# Supplementary material for: Genome sequence and analysis of the tuber crop potato
Source: Springer Nature journal article supplement (doi:10.1038/nature10158), 2011-07-01
Supplement: 41586_2011_BFnature10158_MOESM258_ESM.pdf [file 41586_2011_BFnature10158_MOESM258_ESM.pdf]

## SUPPLEMENTARY TEXT

**1. Additional notes on genome sequencing and assembly**DM Illumina library construction and sequencing:

Libraries with an insert size of 200 and 500 bp were prepared following the manufacturer's instructions (Illumina, San Diego, CA). For construction of 2, 5, and 10 kb insert-size libraries, several steps of DNA circularization, digestion of linear DNA, fragmentation of circularized DNA, and purification of biotinylated DNA were performed before adapter ligation. After library preparation and quality control of DNA samples, template DNA fragments were hybridized to the surface of flow cells on an Illumina Genome Analyzer II sequencer (GA2), amplified to form clusters, and sequenced following the standard Illumina protocol.

DM 454 pyrosequencing library construction and whole genome shotgun sequencing:

The DM DNA shotgun and paired-end (~8 and ~20 kb span) tag libraries were prepared using the GS FLX Titanium Library Preparation kit and protocols as recommended by the manufacturer (Roche Applied Science, Mannheim, Germany). The DM DNA was fragmented by hydrodynamic shearing to generate 8 and 20 kb span paired-end tag libraries by following the manufacturer's procedures (Roche Applied Science, Mannheim, Germany). Quantitated DNA fragments, flanked with proper amplification and sequencing adaptors, from the single-stranded DNA shotgun and paired-end libraries were immobilized onto microspheres (beads) and the entire bead-bound library was then emulsified with the amplification reagents (GS FLX Titanium LV emPCR kit). After the emPCR step, the DNA-carrying beads were cleaned and enriched before loading into the wells of a PicoTiterPlate device (GS FLX Titanium PicoTiterPlate Kit 70 × 75) so that the wells contain no more than a single DNA bead. The loaded PTP device was then inserted into the Genome Sequencer FLX Instrument, and sequencing reagents were sequentially flowed over the plate. The sequencing was done using the GS FLX Titanium Sequencing Kit and the Genome Sequencer FLX Instrument strictly following the recommendations of the manufacturer (Roche Applied Science, Mannheim, Germany). The raw output comprising a set of digital images (PIF files) was processed to obtain the sequence of the DNA library fragments/reads and then subjected to further downstream analysis.

DM BAC and fosmid library construction and end sequencing:

A BAC library (LuSpBAC, 100,224 clones, average insert size > 100 kb) was constructed in the pSMART-BAC vector from sheared DM nuclear DNA (Lucigen, Middleton, WI). Three separate fosmid libraries (POTATO-F-01-40KB, POTATO-F-02-40KB, POTATO-F-03-40KB) were constructed from sheared DM nuclear DNA in the pCC1FOS™ Vector (Epicentre, Madison, WI). Templates for Sanger end sequencing were prepared using a high throughput alkaline lysis method, sequenced on ABI 3730xl sequencers using standard high throughput sequencing methods. Sequences were processed with Paracel Trace Tuner (<http://sourceforge.net/projects/tracetuner>), trimmed to remove vector, low-quality, and *E. coli* sequences using Lucy<sup>1</sup>.

### RH BAC-by-BAC sequencing:

The majority of the BACs were assigned to the corresponding chromosomal location on the basis of Amplified Fragment Length Polymorphism markers from the ultra-high density genetic map, with additional anchor points coming from simple sequence repeat (SSR) mapping, fluorescent *in situ* hybridizations (FISH), or tomato sequences<sup>2,3</sup>.

Consensus base calling errors in the BAC sequences were corrected using custom Python and C scripts using a similar approach described previously<sup>4</sup>. Briefly, 31-mers were extracted from the RH whole-genome Illumina GA2 paired-end data and 31-mers with a frequency lower than three were discarded. These 31-mers were subsequently aligned to the BAC sequences, after which erroneous base-calls in the BAC sequences were detected as positions that were covered by less than ten distinct, overlapping 31-mers. Errors were corrected by changing the nucleotide at that position through substitution, insertion or deletion, such that valid 31-mer coverage was maximized. In total, 17,114 base-calling errors were repaired, corresponding to one corrected error every 12 kb (Supplementary Table 30). Approximately 45% of these involved deletions at contig edges, which is likely the result of incorrect base calls due to low sequence coverage in these regions.

### Additional notes on the DM genome assembly:

The de Bruijn graph method was used to represent all possible sequences assembled by Illumina reads, with a K-mer as a node and the K-1 bases overlap between two K-mers as an edge. To reduce sequencing errors and eliminate branches, tips, and low coverage, K-mers in the graph were excluded. The de Bruijn graph was then converted to a contiging graph by turning a series of linearly connected K-mers to a pre-contig node. Bubbles detected using Dijkstra's algorithm were then merged into a single path given that sequences of branches were sufficiently similar. Following this approach, repeat regions were assembled into consensus sequences.

Paired reads were further used to link contigs to a scaffolding graph. Edges in this graph were connections between contigs and the branch lengths indicated the gap sizes estimated from the insert size of paired-end reads. Subsequently, we used sub-graph linearization to turn interleaving contigs into a linear structure and the repeat masking method to mask the complicated connections of repeat contigs. By this method, contigs in any "non-linear sub-graph" were assumed to be compatible. Paired-end information was then used step by step with increasing insert sizes of 200 and 500 bp, and 2, 5 and 10 kb and the initial Illumina contigs and scaffolds were constructed. To fill gaps inside scaffolds, the majority of which were composed of repeats masked during the scaffold construction, we used the paired-end information to retrieve read pairs that had one read well-aligned on the contigs and another read located in the gap region, and then conducted a local assembly for the collected reads.

The following terms are used to describe the WGS assembly of DM. A contig is a contiguous genomic sequence in which the order of bases is known to a high confidence level and therefore will not contain Ns. A scaffold is a portion of the genome sequence reconstructed from end-sequenced whole genome shotgun clones or fragments and are composed of contigs

with associated gaps. A superscaffold is constructed from two or more scaffolds that are connected using 100 'Ns'. Joining of scaffolds into superscaffolds is supported by BAC and/or fosmid pair end sequences. The nomenclature for scaffolds and superscaffolds is PGSC0003DMS##### and PGSC0003DMB#####, in which PGSC is the short name of potato genome sequencing consortium, 3 represents the third version of the genome assembly, DM is the genotype that was sequenced, and S and B represent scaffolds and superscaffolds, respectively. "#####" is the unique identifier for the scaffold or superscaffold. PGSC0003DMC##### is the identifier for a contig.

## 2. Additional genome assembly quality assessments

### DM fosmid and BAC end sequence comparisons:

Paired-end sequences of BACs (DM and RH) and DM fosmids were used to assess the quality of the v3.0 assembly. End sequences mapping on the scaffolds and super-scaffolds with incorrect orientation (plus-plus and minus-minus) or direction (ends looking outwards rather than inwards) were considered an indicator of potential mis-assembly (Supplementary Table 3). The overall estimated mis-assemblies are less than 0.12% for scaffolds and 0.23% for super-scaffolds using 60 and 300 kb maximal insert sizes for the fosmid and BACs, respectively. This is expected, since generation of both scaffolds and superscaffolds is an error prone process. The data actually indicate that each of the two processes has a very low error rate (below 0.15%). RH BACs gave a significantly higher estimation of mis-assembly (0.24% and 0.37% for scaffolds and superscaffolds, respectively) when mapped on the DM assembly, most likely attributable to rearrangements between the RH and DM genomes.

### DM BAC vs WGS comparisons:

To evaluate the quality of the assembled genome, DM BACs from euchromatic regions as well as randomly selected regions were sequenced using Sanger shotgun sequencing methods<sup>5</sup>. Five DM BACs from chromosome 3 and four DM BACs from chromosome 4 were identified by BLAST-based comparison of the entire DM BAC-end-sequence database against finished tomato BAC sequences (for chromosome 4-derived BACs) or DM scaffolds previously identified as being derived from chromosome 3 (by BLAST-based comparisons with chromosome 3-specific BACs from RH089-039-16). Two further BACs were chosen at random from the DM BAC library to yield a total of 11 BACs that were sequenced to a minimum six-fold coverage using standard Sanger methods. Subclone libraries with insert sizes of 2-3 kb were used and both ends of subclones were sequenced. BACs were assembled to a minimum standard of HTGS Phase II using standard assembly methods. A minimum phred threshold score of 20 was used for inclusion of sequences in the primary assembly. The eleven BACs were submitted to Genbank/EMBL nucleotide sequence databases under the accession numbers: AC243865 – AC243869, FR823285 – FR823289, and FR823512.

Graphical alignments between sequenced BACs and their equivalent scaffold regions (including inserted N-gaps) were prepared in the GenomeComp program<sup>6</sup>. To highlight small sequence differences not visible on the BLAST-based comparison, BAC and scaffold sequences

were aligned using the ClustalW2 and FSA programs<sup>7,8</sup> and the positions of all sequence differences rendered graphically using a PERL script. These outputs were manually merged with the GenomeComp output to produce composite figures (Supplementary Fig. 2a). Coverage plots for the DM scaffolds were created from the alignment of Illumina read pairs from the DM 5 kb insert library to the DM scaffold sequences using Bowtie<sup>9</sup>. Based on all observed insert sizes, an upper and lower boundary for the library insert size was determined. With these boundaries it was possible to assess if each read pair aligns at the expected distance, within the boundaries. The accurately aligning read-pairs were assembled into a pseudo-coverage plot (green, Supplementary Fig. 2b). All read-pairs aligning at a greater distance than the expected range were assembled into the red pseudo coverage plot.

Concatenated Phase 2 BAC contig sequences and the equivalent scaffold sequences were compressed by removing all gaps and unresolved ('N') nucleotides. Compressed BAC and scaffold sequences were aligned using the ClustalW2 program. Alignment lengths and sequence differences were calculated by the *infaalign* and *diffseq* programs of the EMBOSS software suite with the *wordsize=6* and *globaldifferences=N* parameters. Matching regions of the sequence alignments greater than the word-size were considered to calculate values for single nucleotide differences, mismatches and In/Dels presented in Supplementary Table 2 (the value for the latter was adjusted to remove differences associated with artificial contig joins in Phase 2 BACs).

Nine of the BACs were aligned to seven individual superscaffolds and one BAC to two (contiguous) superscaffolds (Supplementary Fig. 2a). In a total alignment length of 1054916 bp, 1031292 bp of superscaffold sequence and 1010040bp of BAC sequence was represented. Alignments showed length differences for equivalent BAC/scaffold regions in all cases. In three cases, the differences were relatively minor (BAC sequences were between 23 and 623 nucleotides longer). In the remaining cases the scaffold exceeded the equivalent BAC region. The majority of the differences (which were under 7 kb) were attributable to the overestimation of gaps inserted into the superscaffold sequences (represented by runs of 'N's in the sequence) during the assembly of the NGS reads. This was supported by mapping read-pairs from the Illumina 5 kb paired-end library back to the DM scaffold sequence (Supplementary Fig. 2b). In a single instance, the superscaffold sequence exceeded the equivalent BAC sequence by 30kb. Contrary to what was observed in all of the other comparisons, almost all of the length difference in this comparison was represented by superscaffold sequence that appeared in regions between the contig breaks in the Phase 2 BAC, implying that the BAC sequence was incomplete in this case.

Taking these factors into account, the comparisons suggest relatively few gross misassembly events in the superscaffolds. One exception was the comparison involving BAC FR823287, where a stretch of misplaced sequence prevented the joining of the two contiguous superscaffolds to which the BAC spans.

At a local alignment level, only relatively minor differences were apparent between the BAC and scaffold sequences (Supplementary Table 2). These differences comprised largely SNP and small In/Del differences, of which 428 and 222, respectively, were observed in a total sequence

alignment length of 1,054,916 bp. Other minor sequence differences such as longer mismatches and differences in the length of mononucleotide repeats were also observed at a very low rate between the sequences (summarised in Supplementary Table 2). Since the DM clone is homozygous, all of the differences are attributable to sequencing or minor assembly errors in one or both sets of sequences. The eleventh DM BAC (which was chosen at random from the DM BAC library) did not exhibit extensive synteny to any single superscaffold, suggesting it represents a region not covered by the Illumina assembly.

### 3. Genome comparison of DM and RH

#### Comparison of DM and RH assemblies:

Superscaffolds of DM and RH were aligned using megablast with a minimum sequence identity of 90% to identify potential collinear segments. Repetitive matches between a single RH superscaffold and multiple DM superscaffolds, and matches spanning less than 20 kb, were discarded using custom Python scripts. The resulting groups of potentially collinear superscaffolds were subjected to a more accurate alignment using Blastz<sup>10</sup> with the “--gfextend --chain --gapped” parameters. These alignments were filtered for a minimum match length of 1000 bp and a minimum sequence identity of 90%, and repetitive matches were discarded using custom Python scripts. Sequence polymorphism and InDel frequencies were derived from the lastz alignments using custom python scripts. To avoid overestimation of small InDels due to sequencing errors, InDels of 1 and 2 bp were not considered if the distance between them was less than 30 bp or the identity of 10 bp of flanking sequence on each side was smaller than 95%. The same methodology was applied to investigate the sequence diversity between the corresponding linkage-specific superscaffolds of RH.

#### K-mer analysis of the genome sequence of RH and DM:

A set of scripts was used to produce and process K-mer data:

- By sliding a K base-pair long window over each read, extracting basic K-mers. K-mers without degenerate nucleotides (e.g., Ns) are retained, normalized (reverse-complementing K-mers with a G or T in the middle position) and counted, producing a K-mer-count table.
- K-mer-count table subsets are produced by applying minimum and maximum count thresholds to a K-mer count table.
- K-mer-count table intersections are produced by comparing two K-mer-count tables, producing four separate K-mer-count tables: 1) with K-mers unique to the first input file, 2) with K-mers unique to the second input file, 3) with common K-mers and corresponding counts from the first input file, and 4) with common K-mers and corresponding counts from the second input file.
- K-mer-count tables are converted into K-mer volume histograms (as shown in Fig. 3b, Supplementary Fig. 9) by computing, for each K-mer frequency, the volume of K-mers in the dataset occurring at that frequency.

Choice of a useful value for K depends on sequencing error rates and uniqueness of K-mers in the underlying genome. In our case we chose K=31. K-mer-count tables denoted ‘DM\_all’ and

'RH\_all' (Fig. 3b) were produced from the complete DM Illumina dataset and the complete RH Illumina paired-end dataset respectively. Sub-selecting (thresholds 10 and infinite) K-mer-counts from 'DM\_all' yielded table 'DM\_proper'. The second output file of the intersection of 'DM\_proper' with 'RH\_all' yields 'RH\_specific' (Supplementary Fig. 12). The complete set of Illumina RNA-sequences yielded K-mer-count table 'RNA\_all', which, intersected with 'RH\_all', yields 'RH\_WGS\_counts\_of\_exome' (fourth output file, Supplementary Table 12).

Because the large volume of erroneous K-mers and putative multi-copy and repetitive K-mers would adversely affect a straightforward automatic fit, overlapping normal distributions were simply fitted manually, with an emphasis on the central part of the bi-modal distribution. The homozygous peak is expected to be located at twice the frequency of the heterozygous peak, with an estimated peak-width of twice the width of the heterozygous peak, leaving 4 parameters to be estimated: one peak position and standard deviation and two peak heights. The volume under the fitted homozygous peak divided by the combined volume under hetero- and homozygous fitted peaks yields a K-mer homozygosity estimate, which can be converted into a nucleotide identity estimate by taking the K-th power root (assuming random distribution of differences).

#### 4. Genome annotation

##### Repetitive sequences:

Long terminal repeats (LTRs) are the most predominant class of TEs in potato, representing 29.4% of the genome, similar to *Arabidopsis thaliana* (28.5%)<sup>11</sup> but much greater than rice (14.7%)<sup>12</sup>, cucumber (10.4%)<sup>13</sup> and grape (11.6%)<sup>14</sup>. The peak divergence rate of TEs, as measured by the percentage of substitutions in well-aligned regions between annotated repeats in potato and consensus sequences in Repbase<sup>15</sup>, was approximately 32% indicating that most of the identified repeats are relatively ancient (Supplementary Fig. 13).

##### Gene prediction:

Solanum species used in EST alignments: *Capsicum annuum*, *Petunia x hybrida*, *Solanum tuberosum*, *Nicotiana benthamiana*, *Nicotiana langsdorffii* x *Nicotiana sanderae*, *Nicotiana sylvestris*, *Nicotiana tabacum*, *Solanum lycopersicum*, *Solanum chacoense*, *Solanum pennellii*, and *Solanum habrochaites*; 163a, corresponding to GenBank Release 163 (27 December 2007). Metrics of the final gene models indicate longer untranslated regions than that of *A. thaliana* (Supplementary Table 31) most likely attributable to the use of deep RNA-seq transcriptome data. Functional annotation of the final gene set was comparable to other angiosperms (Supplementary Table 32).

#### 5. Chloroplast and mitochondrial genomes

Organelle genomes were assembled from the sequence traces. All reads were searched for chloroplast and mitochondrial sequences using Bowtie<sup>9</sup> with *Solanum* and *Nicotiana* query sequences derived from GenBank (DQ386163; DQ231562; Z00044; AM087200; BA000042; FJ374974) and unpublished mitochondrial sequences from potato cv. Spunta small insert

libraries. Traces were assembled using CAP3<sup>16</sup> (<http://seq.cs.iastate.edu/>) and Celera WGA Assembler<sup>17</sup> (<http://sourceforge.net/apps/mediawiki/wgs-assembler/>). The chloroplast genome was 155,251 and 155,483 bp for DM and RH, respectively. Overall nucleotide similarity was 99.84%, including a 241 bp deletion (present in DM and not in RH), previously reported to be restricted to *S. tuberosum*<sup>18</sup>. Annotation of the DM chloroplast genome was performed using Dual Organellar GenoMe Annotator<sup>19</sup> (DOGMA; <http://dogma.cccb.utexas.edu/>). The chloroplast genome codes for 106 genes: 73 proteins, 29 tRNAs and 4 rRNAs.

The dynamic structure of plant mitochondria represented by a family of recombinant circles of different sizes prevented the assembly of sequences in a single molecule. All data retrieved were assembled in 71 and 135 scaffolds for DM and RH, spanning 441,953 and 471,559 bp, respectively. Overall similarity of homologous regions was 98.32%. The consensus mitochondrial genome codes for 137 genes (112 proteins, 23 tRNAs and 2 rRNAs) for DM and 150 genes (125 proteins, 23 tRNAs and 2 rRNAs) for RH, with a high degree of duplication. Mitochondrial gene loss and transfer to nuclear DNA during evolution was previously reported<sup>20,21</sup>. In this respect, 36 genes presented in the published tobacco genome<sup>21</sup> (BA000042) were absent from both DM and RH. However, the high number of genes lost suggests a quantum evolutionary change of the mitochondrial genome in the Solanaceae.

Accession numbers for the DM and RH organellar genomes are JF772170- JF772173.

## 6. Transcriptome sequencing

### DM transcriptome:

Vegetative and reproductive tissues (leaves, stolons, petioles, tubers, whole mature flowers, sepals, petals, stamens, carpels, berries) were taken from greenhouse-grown plants for RNA isolation (Supplementary Table 4). To induce biotic stress, we performed three separate detached leaf assays using *Phytophthora infestans* (Pi isolate US8: Pi02-007) and two chemical inducers, acibenzolar-S-methyl (BTH) and DL- $\beta$ -amino-n-butyric acid (BABA). A mock inoculation with sterile water was conducted in parallel. For each detached leaf test, six fully developed leaves were collected immediately before treatments and placed on top of a plastic mesh in a 29.3 l plastic box containing six layers of wet absorbent paper towels. For *P. infestans* inoculations, sporangia were harvested from 11-13 days old cultures grown on Rye A Agar<sup>22</sup>. Sporangial suspensions of approximately 30,000 sporangia/ml were used for spray inoculations (0.5-0.7 ml). Inoculated leaves were incubated in the dark at room temperature for 8-10 h and then maintained in light at room temperature for seven days. For chemical treatments, BABA (2 mg/ml) and BTH (100 /ml) were dissolved in water and sprayed onto the leaves. Inoculated leaves were incubated in light at room temperature for seven days. Tissue samples from inoculated and mock inoculated leaves were collected at 24, 36, and 72h after inoculation and stored at  $-80^{\circ}\text{C}$  prior to RNA isolation.

For abiotic stress treatments and isolation of shoot and roots from *in vitro* grown plants, DM plants were grown *in vitro* at 22°C day/18°C night with a 16 h photoperiod in three separate media (A, B, C) (Supplementary Table 4). Medium A (4.3 g/l MS salts, 3% sucrose, 0.17 g/l sodium phosphate, 2.5 mg/l thiamine, 0.1 g/l myo-inositol) was used for control and heat

treatment (35°C 24 hr). Medium B (half-strength MS salts with 1.5% sucrose) was used for *in vitro* root and shoot tissues, salt (150 mM NaCl), and mannitol (260  $\mu$ M) treatment. Medium C (half-strength MS salts and vitamins supplemented with 1.5% sucrose) was used for control, abscisic acid (ABA; 50  $\mu$ M), indole-3-acetic acid (IAA; 10  $\mu$ M), gibberellic acid (GA3; 50  $\mu$ M), and 6 benzylaminopurine (BAP; 10  $\mu$ M) treatment. All abiotic stress was for 24 h and roots and shoots were harvested together. Callus was generated from DM leaves and stems on Step I medium (4.4 g/l MS salts, 30 g/l sucrose, 0.9 mg/l thiamine, 0.8 mg/l zeatin riboside, and 2 mg/l 2,4-D; 16 h light/8 h dark at room temperature) with explants transferred to fresh media once a week.

Total RNA was isolated using a phenol method. Samples were treated with DNase in the presence of RNase inhibitor prior to cDNA synthesis. All samples were separated on an Agilent Bioanalyzer 2100 to check for RNA integrity. cDNA was constructed using the Illumina RNA-Seq kit (mRNA-Seq Sample Prep Kit P/N 1004814) and was sequenced on Illumina GA2 sequencers using 36 bp single reads with a subset sequenced using the paired end read module (76/76 and 105/85 bp).

#### RH transcriptome:

RH tubers were planted in soil-filled pots in the greenhouse. After plant emergence and several weeks of growth, non-tuberizing stolons were harvested (RH Stolon). Around one week after the first swellings were observed, small tubers were collected with a maximum size of 1 cm (RH Young tuber). Around the same time, anthesis occurred and both open flowers and developing flower buds were harvested (RH flower).

Around the 12<sup>th</sup> leaf stage (4 weeks after first visible swelling) various tissues were harvested, including leaves (fully expanded), shoot apex, petioles, stem, tubers (RH Mature Tuber) and roots, and immediately frozen in liquid nitrogen. Stamens were collected at the same time from fully opened flowers. All tissue samples were collected from at least five different plants. For the water-stressed leaf tissue sample, a subset of plants was denied water for 2 days after which wilting leaves were harvested (2<sup>nd</sup> – 4<sup>th</sup> fully expanded leaf). For the tuber cross section, plants were left to senescence. Tubers were then collected, and peel, cortex and pith tissues were sampled and immediately frozen in liquid nitrogen. Sprouts of previously harvested RH tubers were harvested after storage at RT in the dark for 3–4 months. RH *in vitro* plants were grown on standard MS medium on 2% sucrose with 16 h of light at 24°C for 2 weeks, after which the whole explant, including roots, was harvested.

A total of 16 tissues was collected (Supplementary Table 4) and RNA was isolated using the RNeasy kit (Qiagen), except for the tuber and root tissues, which were isolated using the hot-phenol method. The latter samples were then purified using the RNeasy columns. For all samples, on-column DNaseI treatment was performed and the quality and integrity of the obtained RNA was checked using the ND-100 spectrophotometer (Nanodrop Technologies) and agarose gel-electrophoresis. cDNA libraries were constructed and sequenced as described for the DM samples without the paired end read module.



### Gene expression visualization:

Complete linkage hierarchical clustering, using uncentred Pearson's correlation as distance measure was performed on both transcripts and samples using the clustering software Cluster 3.0<sup>23</sup>. For visualization purposes, FPKM values were normalized to the total expression of each transcript. A subset of the gene expression data set was selected, omitting samples from whole plant or stressed tissue, and genes with a FPKM value less than 5 were subjected to hierarchical clustering.

## **7. The karyotype of DM potato**

Meiotic pachytene chromosomes were prepared from the flower buds of the DM clone. Individual pachytene chromosomes were identified by fluorescence *in situ* hybridization (FISH) using chromosome-specific BAC clones<sup>2,24</sup>. Chromosome 1 and 10 represent the longest and the shortest pachytene chromosomes, respectively (Supplementary Table 6). The karyotype of DM is generally similar to the RH clone described previously<sup>2</sup>. All potato chromosomes are metacentric or submetacentric, except chromosome 2, the only nucleolus organizer chromosome in the potato genome, which is acrocentric and has a very small short arm (Fig. 1, Supplementary Fig. 5).

Most of the cytologically distinct heterochromatin, which is represented by brightly stained regions by 4',6-diamidino-2-phenylindole (DAPI), is confined to the pericentromeric region of each chromosome (Supplementary Fig. 5). The transition between the heterochromatic and the euchromatic regions was often not sharp and thus difficult to locate on some chromosomes. The heterochromatic domains of chromosome 9 account for ~43% of the chromosomal length, representing the most heterochromatic chromosome in the potato genome. Distinct heterochromatic knobs were associated with the distal ends of most chromosomes. Some heterochromatic knobs or domains observed on the DM chromosomes were not reported in RH, such as a distinct subtelomeric knob on the long arm of chromosome 10 (Supplementary Fig. 5). Thus, the DM and RH clones are polymorphic at the cytological level.

## **8. Carotenoid analyses**

Carotenoids are nutritionally important compounds. To measure carotenoid levels, peeled potato tuber tissues from greenhouse grown plants were ground to a powder in liquid nitrogen and pigments extracted in methanol: chloroform as described<sup>25</sup>. Separation and quantification of carotenoids was performed using reverse phase HPLC using an Ascentis 2.7  $\mu$ m particle 100 x 3 mm column (Supelco, Park Bellefonte, PA) and a gradient system of solvent A, acetonitrile-water (70:30 v/v) and solvent B, acetonitrile-isopropanol (50:50 v/v). The column was equilibrated with 15% buffer B and separations performed with the following gradients: 0–3.5 min, 15 to 44% B; 3.5–6 min, 44 to 81.4% B; 6–10 min 81.4 to 95% B. 95% buffer B was maintained for an additional 1 min at which time the column was re-equilibrated with 15% buffer B. Carotenoids were detected by absorbance using a Shimadzu SPD-M20A Diode Array Detector and quantified at 450 nm relative to a 5 point curve of purified standards. Racemic tocopherol (Matreya Pleasant Gap, PA, USA) was used as an internal standard to correct for recovery during

extraction and was detected by fluorescence at 290 nm excitation and 325 nm emission using a Shimadzu FLX-10AXL fluorometer. Carotenoid levels, as well as the mRNA of several genes in the enzymatic pathway, differed between DM and RH, consistent with the visual pigmentation differences in the tuber flesh (Supplementary Fig. 14, Table 33).

In particular, DM tubers show higher expression than RH of the non-heme beta-carotene hydroxylases *Chy2* and *Chy3* (Supplementary Fig. 14, Table 33); the chromosomal position of these genes corresponds to that of the *yellow* locus, underpinning tuber carotenoid content<sup>26,27</sup> (Supplementary Table 34). Several duplications are observed in carotenoid genes, some more ancient (the *LCYb-CYCb* duplication is found in potato, tomato and grape), others more recent (the *PSY1-PSY2* and *CHY1-CHY2* duplications are found in potato and tomato) (Supplementary Fig. 15). Interestingly, orthologous genes in potato and tomato show a similar pattern of tissue-specific expression: for instance, *PSY1*, *CYCb* and *CHY2* are highly expressed in the flowers of both species (data not shown).

### 9. Kunitz protein invertase analysis methods

In order to identify the Kunitz-type proteinase inhibitor genes in the potato, tomato and *Populus* genomes, we performed a Blast search<sup>28</sup> of the protein sequence (NCBI accession number: AAC49602.1) to the potato, tomato and *Populus* protein sets (potato protein set, tomato protein set: BGI v2.10, *Populus* protein set: JGI v2.0) (Expect Value < 1e-5 and coverage >80%). Following multiple alignment using ClustalW<sup>8</sup>, Neighbor-Joining trees<sup>29</sup> were constructed using the p-distance model and 650 bootstrap replications with the MEGA 4.0<sup>30</sup> software package. Expression pattern heatmaps were drawn using Cluster 3.0<sup>23</sup> with expression levels of each gene in 12 DM and 16 RH transcriptome libraries.

### 10. SP gene analysis methods

To elucidate the dynamic changes of SP gene family in potato and tomato genome, we downloaded the protein sequences of SP genes from NCBI<sup>31</sup> (Accession: SP-U84140, SP2G-AY186734, SP3D-AY186735, SP5G-AY186736, SP6A-AY186737, and SP9D-AY186738). In order to identify all potential SP homologues, we performed an extensive homologue-based search against the proteomes of potato and tomato with the SP sequences using similarity  $\geq 80\%$  and coverage  $\geq 80\%$ . To clarify the extent of synteny erosion for each tomato-potato SP orthologous pair, we plotted the corresponding homologous region plus 100 kb flanking for each SP gene. As seen from Supplementary Fig. 7, while preserved in many cases, slight changes of the number of duplicates occurred in the corresponding orthologous potato-tomato regions, resulting from tandem duplication, transposon activity, and gene gain or loss. In total, 3 duplicates in potato correspond to 2 in tomato in chromosome 1, for chromosome 3: 2 vs. 2, chromosome 5: 2 vs. 2, chromosome 6: 1 vs. 1, chromosome 9: 1 vs. 1, chromosome 11: 2 vs. 1, respectively. Additionally, for SP2G, located on tomato chromosome 2, no homologous counterpart in the potato genome was detected. The potato gene set was obtained from PGSC annotation version 3.2, and the reconstruction of the pseudochromosomes are based on the AGP file version 2.0 and confirmed with v3.4 of the annotation. Tomato genes were based

on BGI annotation of tomato genome assembly version 2.1.

## LITERATURE CITED

- 1 Chou, H. H. and Holmes, M. H., DNA sequence quality trimming and vector removal. *Bioinformatics* **17** (12), 1093 (2001).
- 2 Tang, X. et al., Assignment of genetic linkage maps to diploid *Solanum tuberosum* pachytene chromosomes by BAC-FISH technology. *Chromosome Res.* **17** (7), 899 (2009).
- 3 van Os, H. et al., Construction of a 10,000-marker ultradense genetic recombination map of potato: providing a framework for accelerated gene isolation and a genomewide physical map. *Genetics* **173** (2), 1075 (2006).
- 4 Chaisson, M., Pevzner, P., & Tang, H., Fragment assembly with short reads. *Bioinformatics* **20** (13), 2067 (2004).
- 5 Zhu, W. et al., Analysis of 90 Mb of the potato genome reveals conservation of gene structures and order with tomato but divergence in repetitive sequence composition. *BMC Genomics* **9**, 286 (2008).
- 6 Yang, J. et al., GenomeComp: a visualization tool for microbial genome comparison. *J. Microbiol. Methods* **54** (3), 423 (2003).
- 7 Bradley, R. K. et al., Fast statistical alignment. *PLoS Comp. Biol.* **5** (5), e1000392 (2009).
- 8 Thompson, J. D., Plewniak, F., Thierry, J., and Poch, O., DbClustal: rapid and reliable global multiple alignments of protein sequences detected by database searches. *Nucleic Acids Res.* **28** (15), 2919 (2000).
- 9 Langmead, B., Trapnell, C., Pop, M., & Salzberg, S. L., Ultrafast and memory-efficient alignment of short DNA sequences to the human genome. *Genome Biol.* **10** (3), R25 (2009).
- 10 Schwartz, S. et al., Human-mouse alignments with BLASTZ. *Genome Res.* **13** (1), 103 (2003).
- 11 Arabidopsis Genome Initiative, Analysis of the genome sequence of the flowering plant *Arabidopsis thaliana*. *Nature* **408** (6814), 796 (2000).
- 12 Wang, X. et al., Duplication and DNA segmental loss in the rice genome: implications for diploidization. *New Phytol.* **165** (3), 937 (2005).
- 13 Huang, S. et al., The genome of the cucumber, *Cucumis sativus* L. *Nat. Genet.* **41** (12), 1275 (2009).
- 14 Jaillon, O. et al., The grapevine genome sequence suggests ancestral hexaploidization in major angiosperm phyla. *Nature* **449** (7161), 463 (2007).
- 15 Jurka, J. et al., Repbase Update, a database of eukaryotic repetitive elements. *Cytogenet Genome Res* **110** (1-4), 462 (2005).
- 16 Huang, X. and Madan, A., CAP3: A DNA sequence assembly program. *Genome Res.* **9** (9), 868 (1999).
- 17 Myers, E. W. et al., A whole-genome assembly of *Drosophila*. *Science* **287** (5461), 2196

- (2000).
- 18 Chung, H. J. et al., The complete chloroplast genome sequences of *Solanum tuberosum* and comparative analysis with Solanaceae species identified the presence of a 241-bp deletion in cultivated potato chloroplast DNA sequence. *Plant Cell Rep* **25** (12), 1369 (2006).
- 19 Wyman, S. K., Jansen, R. K., and Boore, J. L., Automatic annotation of organellar genomes with DOGMA. *Bioinformatics* **20** (17), 3252 (2004).
- 20 Adams, K. L., Qiu, Y. L., Stoutemyer, M., and Palmer, J. D., Punctuated evolution of mitochondrial gene content: high and variable rates of mitochondrial gene loss and transfer to the nucleus during angiosperm evolution. *Proc. Natl. Acad. Sci. USA* **99** (15), 9905 (2002).
- 21 Sugiyama, Y. et al., The complete nucleotide sequence and multipartite organization of the tobacco mitochondrial genome: comparative analysis of mitochondrial genomes in higher plants. *Mol Genet Genomics* **272** (6), 603 (2005).
- 22 Kuhl, J. C. et al., Late blight resistance of RB transgenic potato lines. *J. Amer. Soc. Hort. Sci.* **132** (6), 783 (2007).
- 23 de Hoon, M. J. L., Imoto, S., Nolan, J., & Miyano, S., Open source clustering software. *Bioinformatics* **20** (9), 1453 (2004).
- 24 Dong, F. et al., Development and applications of a set of chromosome-specific cytogenetic DNA markers in potato. *Theor. Appl. Genet.* **101**, 1001 (2000).
- 25 Collakova, E. & DellaPenna, D., Homogentisate phytyltransferase activity is limiting for tocopherol biosynthesis in Arabidopsis. *Plant Physiol.* **131** (2), 632 (2003).
- 26 Brown, CR et al., Segregation of total carotenoid in high level potato germplasm and its relationship to beta-carotene hydroxylase polymorphism. *Journal of Potato Research* **83**, 365 (2006).
- 27 Bonierbale, M. W., Plaisted, R. L., & Tanksley, S. D., RFLP maps based on a common set of clones reveal modes of chromosomal evolution in potato and tomato. *Genetics* **120** (4), 1095 (1988).
- 28 Altschul, S. F. et al., Gapped BLAST and PSI-BLAST: a new generation of protein database search programs. *Nucleic Acids Res.* **25** (17), 3389 (1997).
- 29 Pearson, W. R., Robins, G., and Zhang, T., Generalized neighbor-joining: more reliable phylogenetic tree reconstruction. *Mol. Biol. Evol.* **16** (6), 806 (1999).
- 30 Tamura, K., Dudley, J., Nei, M., and Kumar, S., MEGA4: Molecular Evolutionary Genetics Analysis (MEGA) software version 4.0. *Mol. Biol. Evol.* **24** (8), 1596 (2007).
- 31 Carmel-Goren, L., Liu, Y. S., Lifschitz, E., and Zamir, D., The *SELF-PRUNING* gene family in tomato. *Plant Mol. Biol.* **52** (6), 1215 (2003).

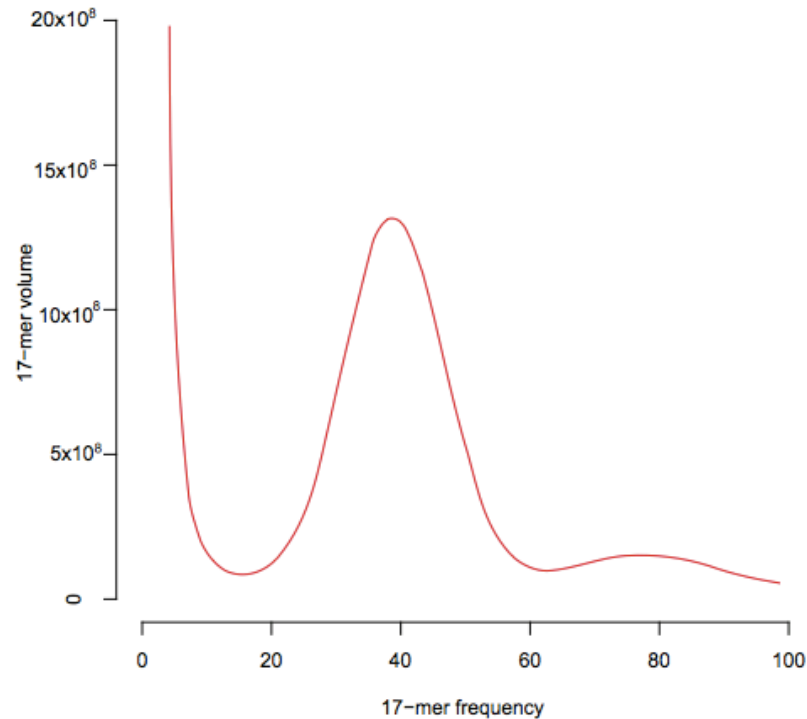

**Supplementary Figure 1.** Illumina 17-mer volume histograms of DM. The volume of K-mers is plotted against the frequency at which they occur. The left-hand, truncated, peak at low frequency and high volume represents K-mers containing essentially random sequencing errors, while the right-hand distribution represents proper (putatively error-free) data. The total K-mer number is 33,761,617,031, and the volume peak is 40. The genome size can be estimated as (total K-mer number)/(the volume peak), which is 844.0 Mb.

a

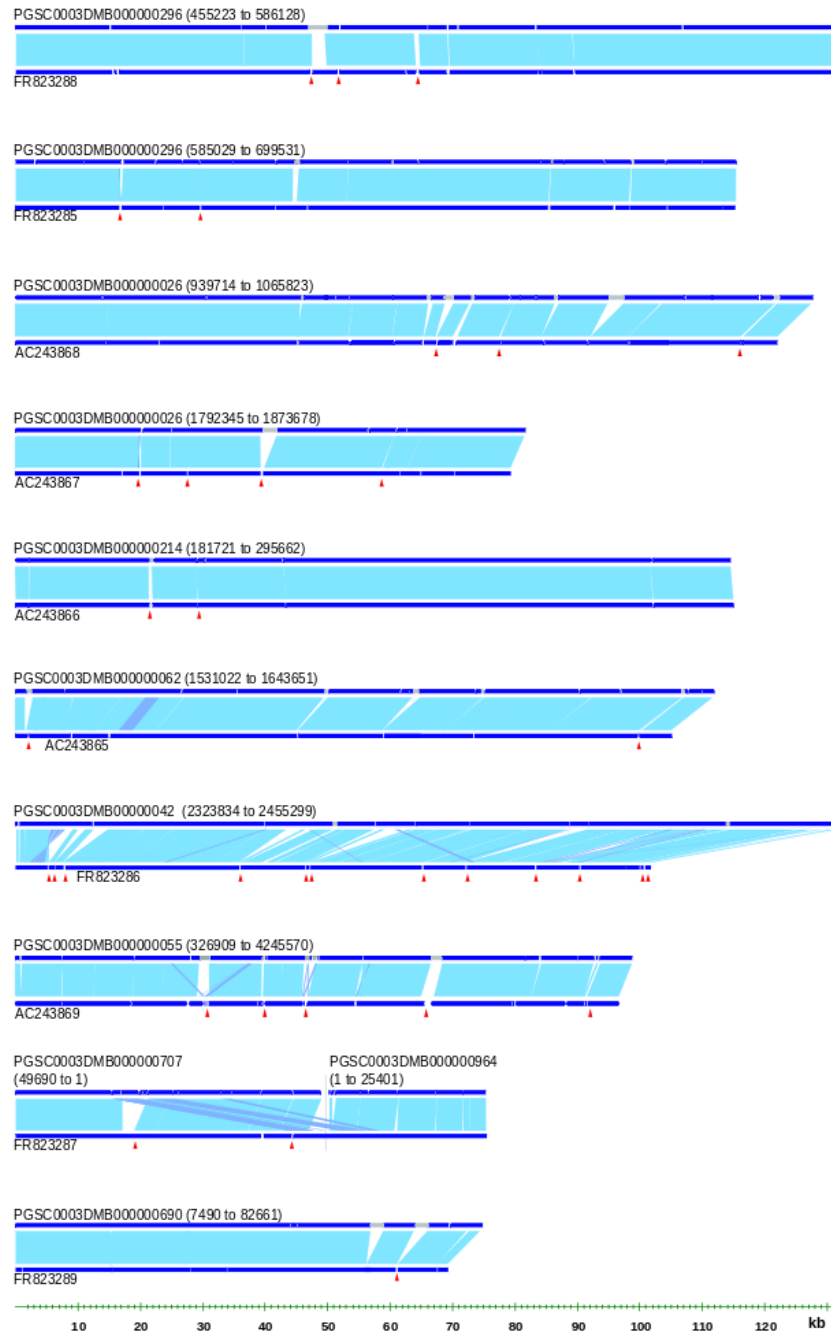

b

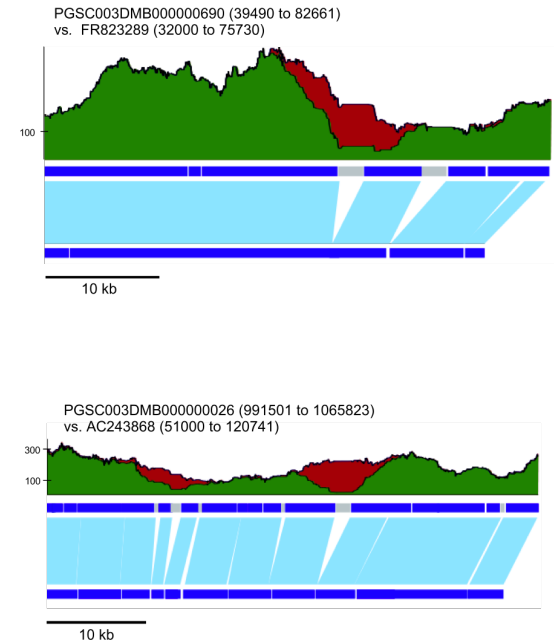

**Supplementary Figure 2. a**, Nucleotide alignments of ten sequenced BACs from DM to their equivalent superscaffold regions in the Illumina assembly. Dark blue tracks represent superscaffolds (top) and BACs (bottom) respectively. Light blue shading between the superscaffold and BAC tracks represents areas of 100% nucleotide identity, with rearrangements indicated by shading. Grey regions on the superscaffold tracks indicate large N runs in the sequence. White gaps on the superscaffold and BAC tracks indicate the position of all nucleotide differences. All BACs were assembled to HTGS Phase 2, and contig ends are indicated by red triangles. **b**, A portion of the alignment of two DM BAC sequences with their corresponding Illumina scaffolds. Several large N-runs inserted into the sequence to indicate a gap in the superscaffold are visible. BAC assemblies suggest that the gap size is generally overestimated. The upper coverage plots show read pairs from the 5kb Illumina paired-end library mapped back to the scaffold sequence. Green areas represent read pairs aligning in the expected range according to library size, red regions represent read pairs aligning at a greater distance than the expected range. Regions in with a large proportion of the latter category (red) are frequently observed to correspond to N-run regions representing gaps and thus supporting the overestimation of gap size.

## Chromosome 7 (53427892 bp)

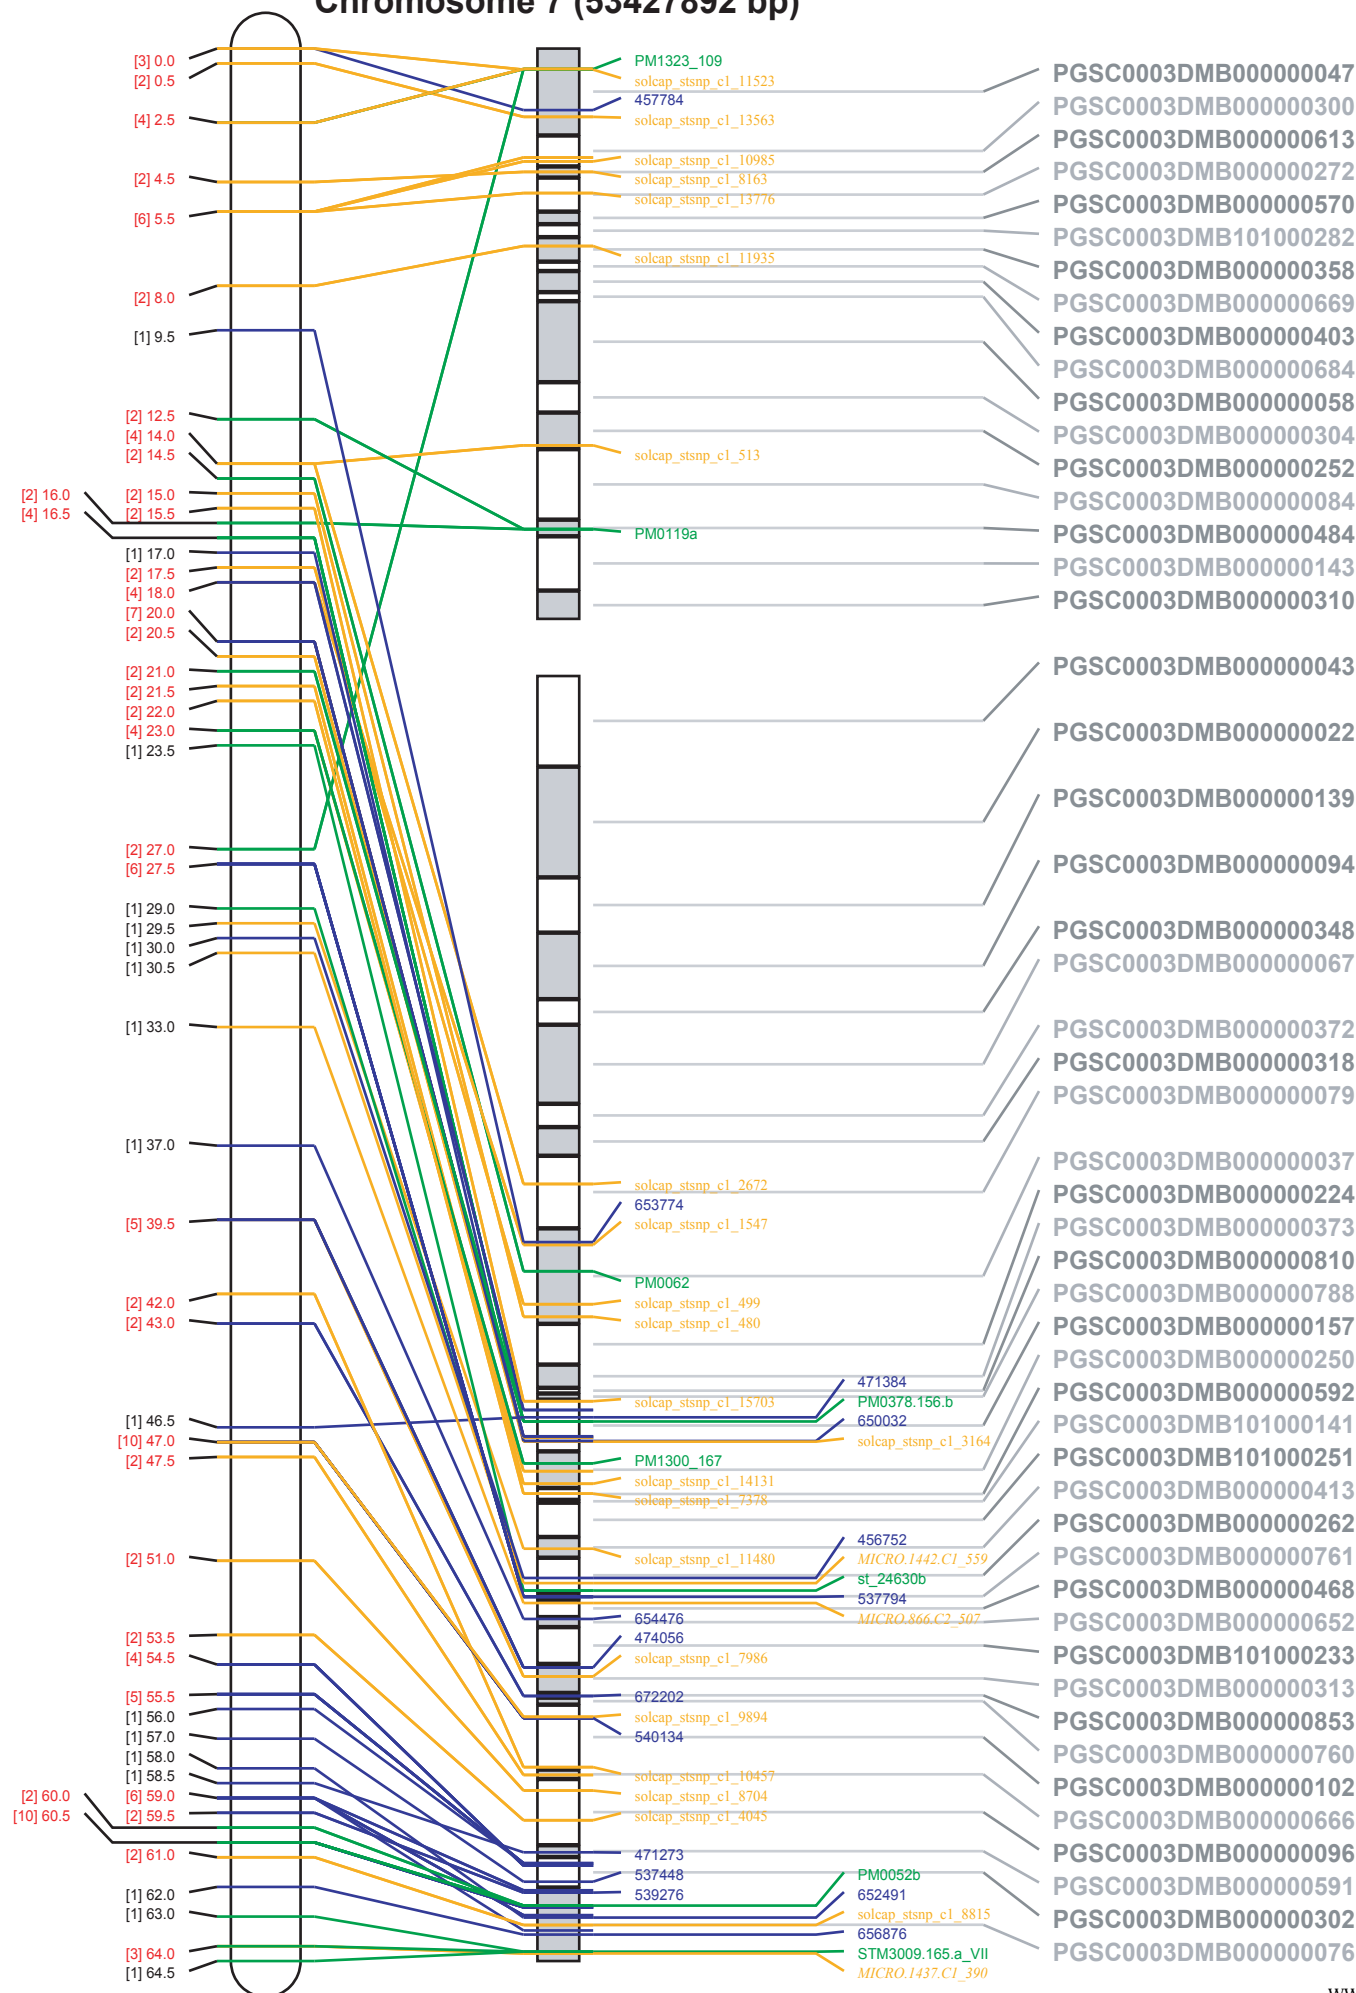**Supplementary Figure 3.**

Comparison of genetic and physical maps of potato chromosome 7 drawn on 180 individuals of the DM/DI//DI progeny and the DM line, respectively. Genetic loci are binned to 0.5 cM and those with multiple marker occupancy are shown in red. All markers are indicated but only one label is shown for each marker type in a bin of ~150kb. Where more than one marker is present in a sequence bin, the number of markers is indicated in parentheses. DArT markers are shown in blue, SSRs in green, and SNPs in orange. This figure was prepared using the DMap software (DMA Martin, manuscript in preparation).

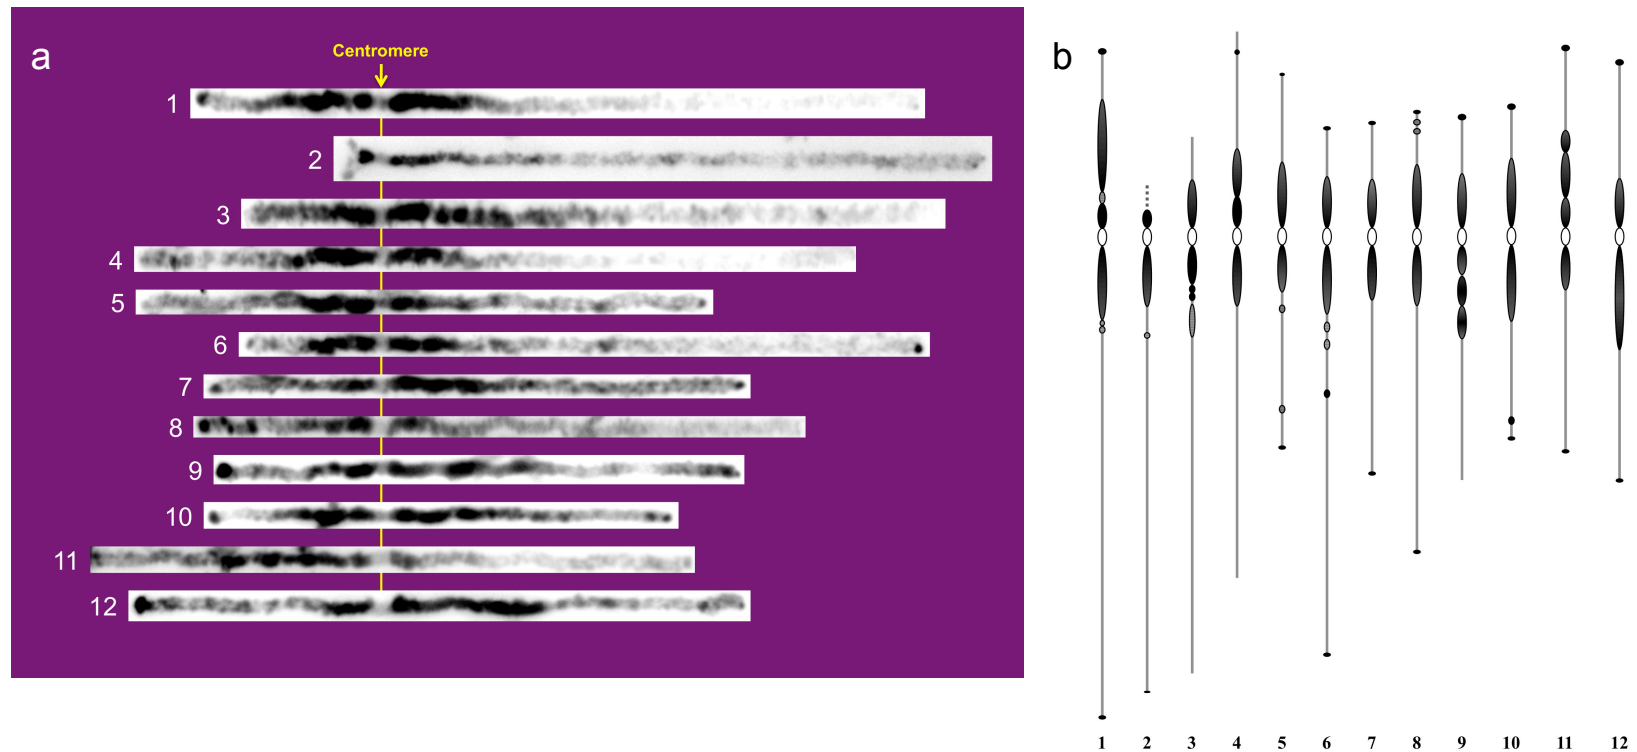

**Supplementary Figure 4.** **a**, Pachytene karyotype of the DM potato. Chromosomes were stained with DAPI and the vertical line is aligned with the centromeres of the chromosomes. **b**, Ideogram of the distribution of heterochromatin on pachytene chromosomes of DM potato. The heterochromatic regions are represented by solid/shaded thickenings based on the staining pattern of DAPI. Shaded thickenings indicate regions that were less stained by DAPI than the regions marked by solid thickenings. Hatched thickenings indicate regions that were not consistently observed in every cell and were sometimes separated into multiple smaller regions on early pachytene chromosomes. Open circles represent the centromeres.



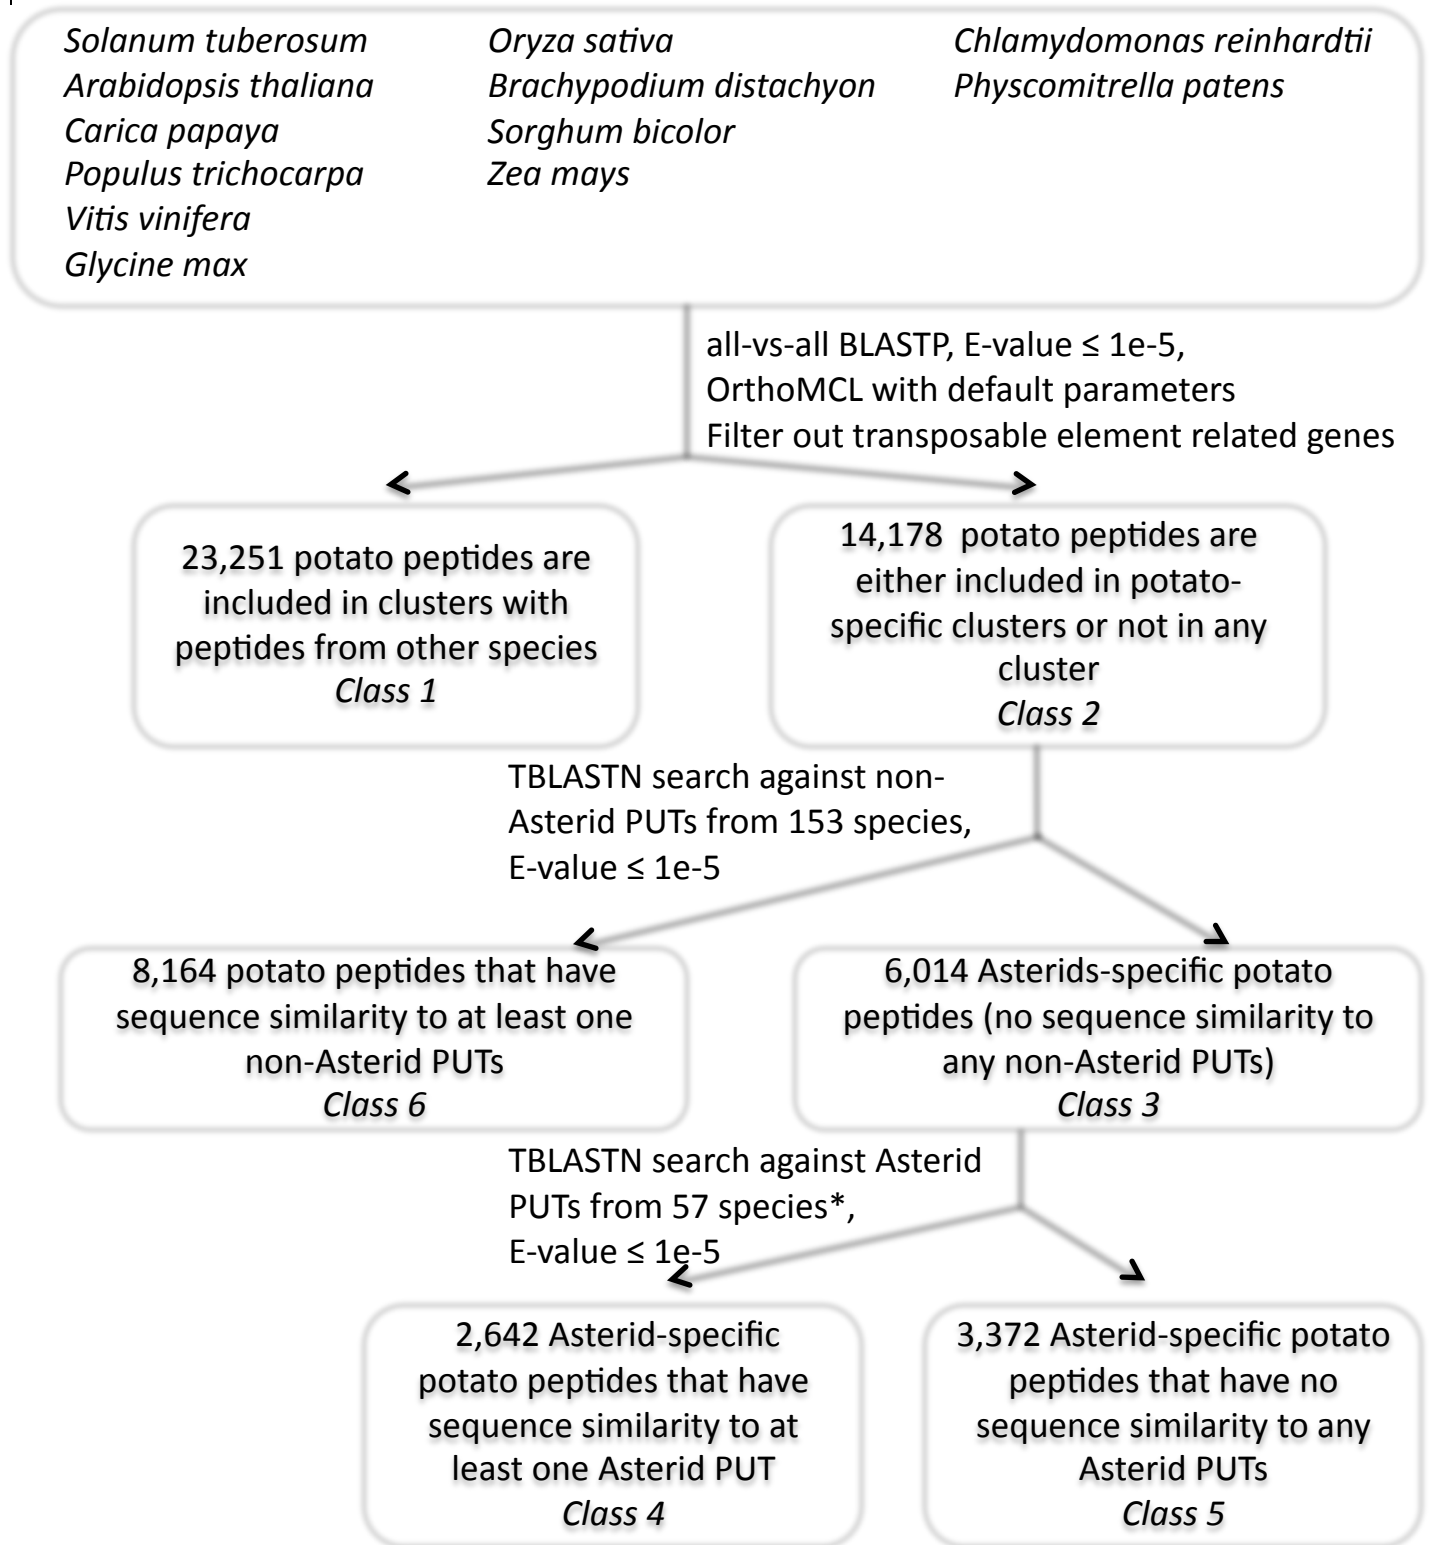

**Supplementary Figure 5. Identification of lineage specific genes.** Potato proteins not clustering with 11 sequenced plant species were filtered for transposable elements and searched against a suite of transcriptome datasets (See Table S32).

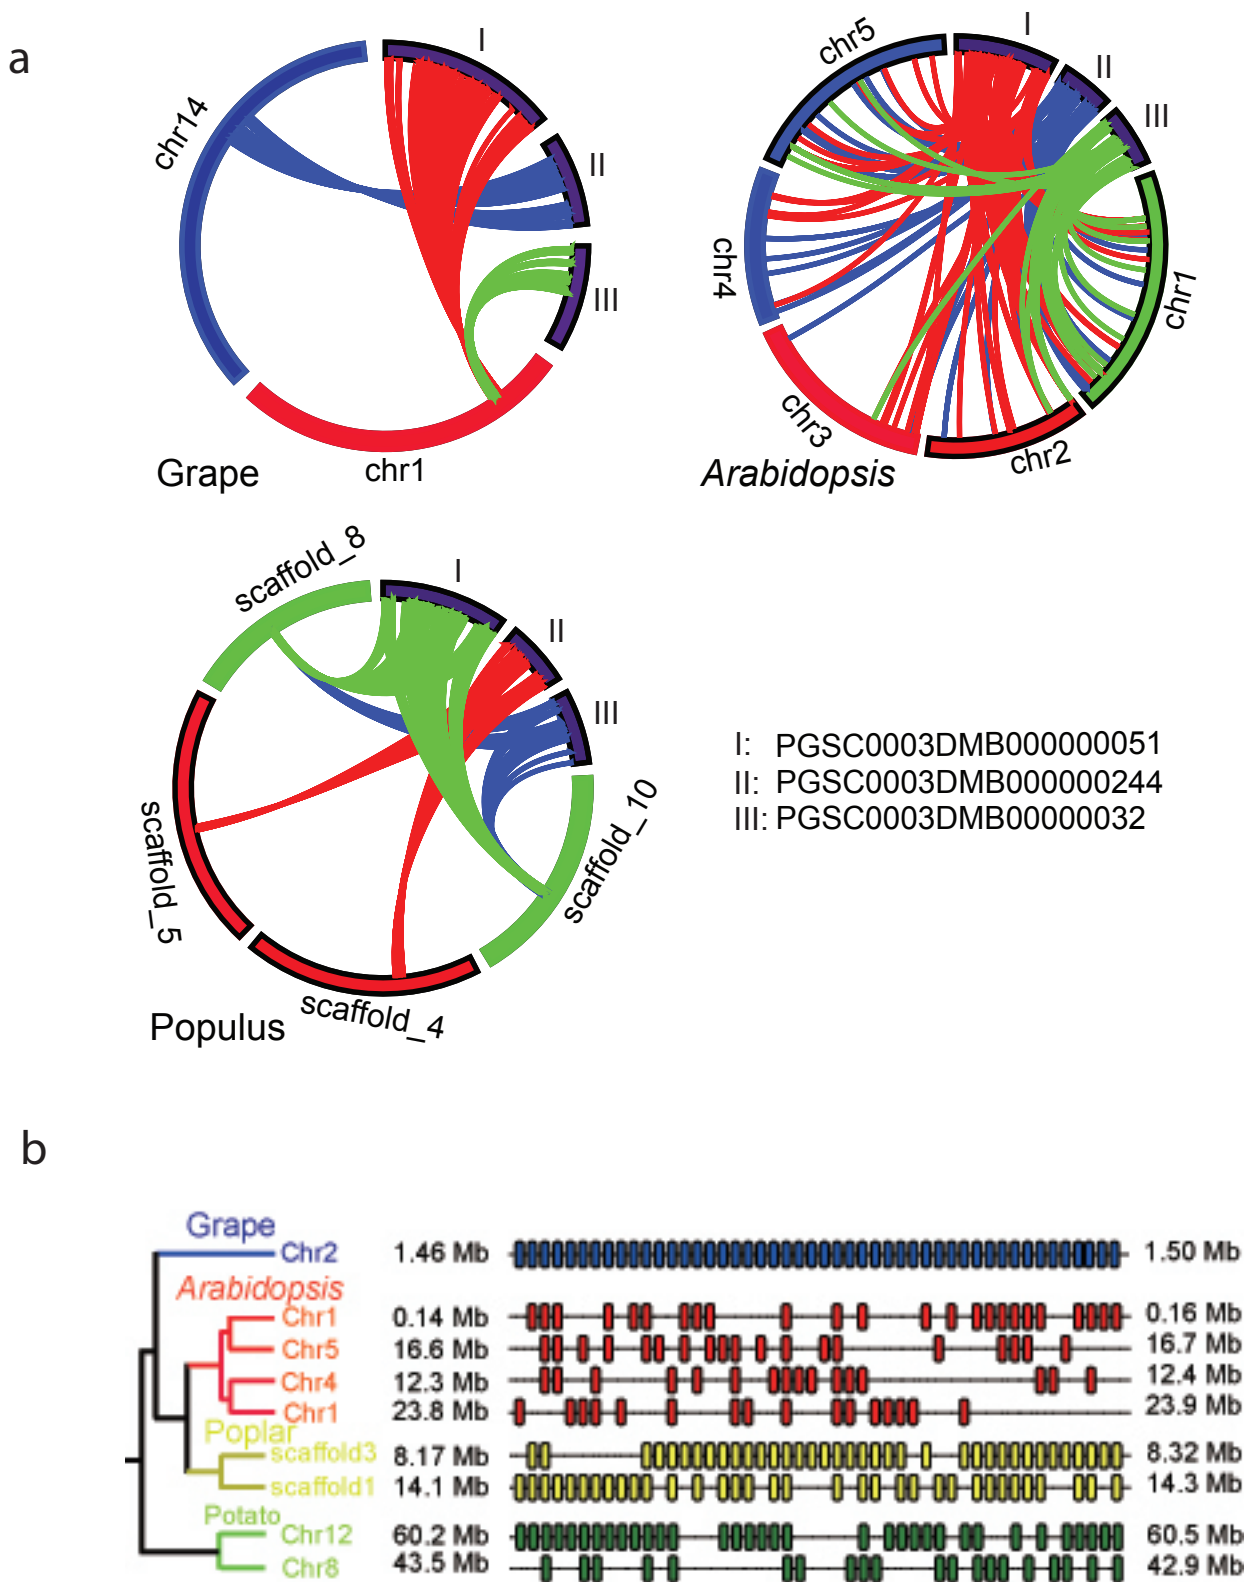

**Supplementary Figure 6. Colinear blocks between potato and three rosid genomes (Grape, Arabidopsis and Populus).** **a**, Colinearity between three paralogous potato genomic regions (I, II, III) and their putative orthologs in rosids genomes. **b**, Two syntenic blocks in potato correspond to one block in grape, two in poplar and four in Arabidopsis

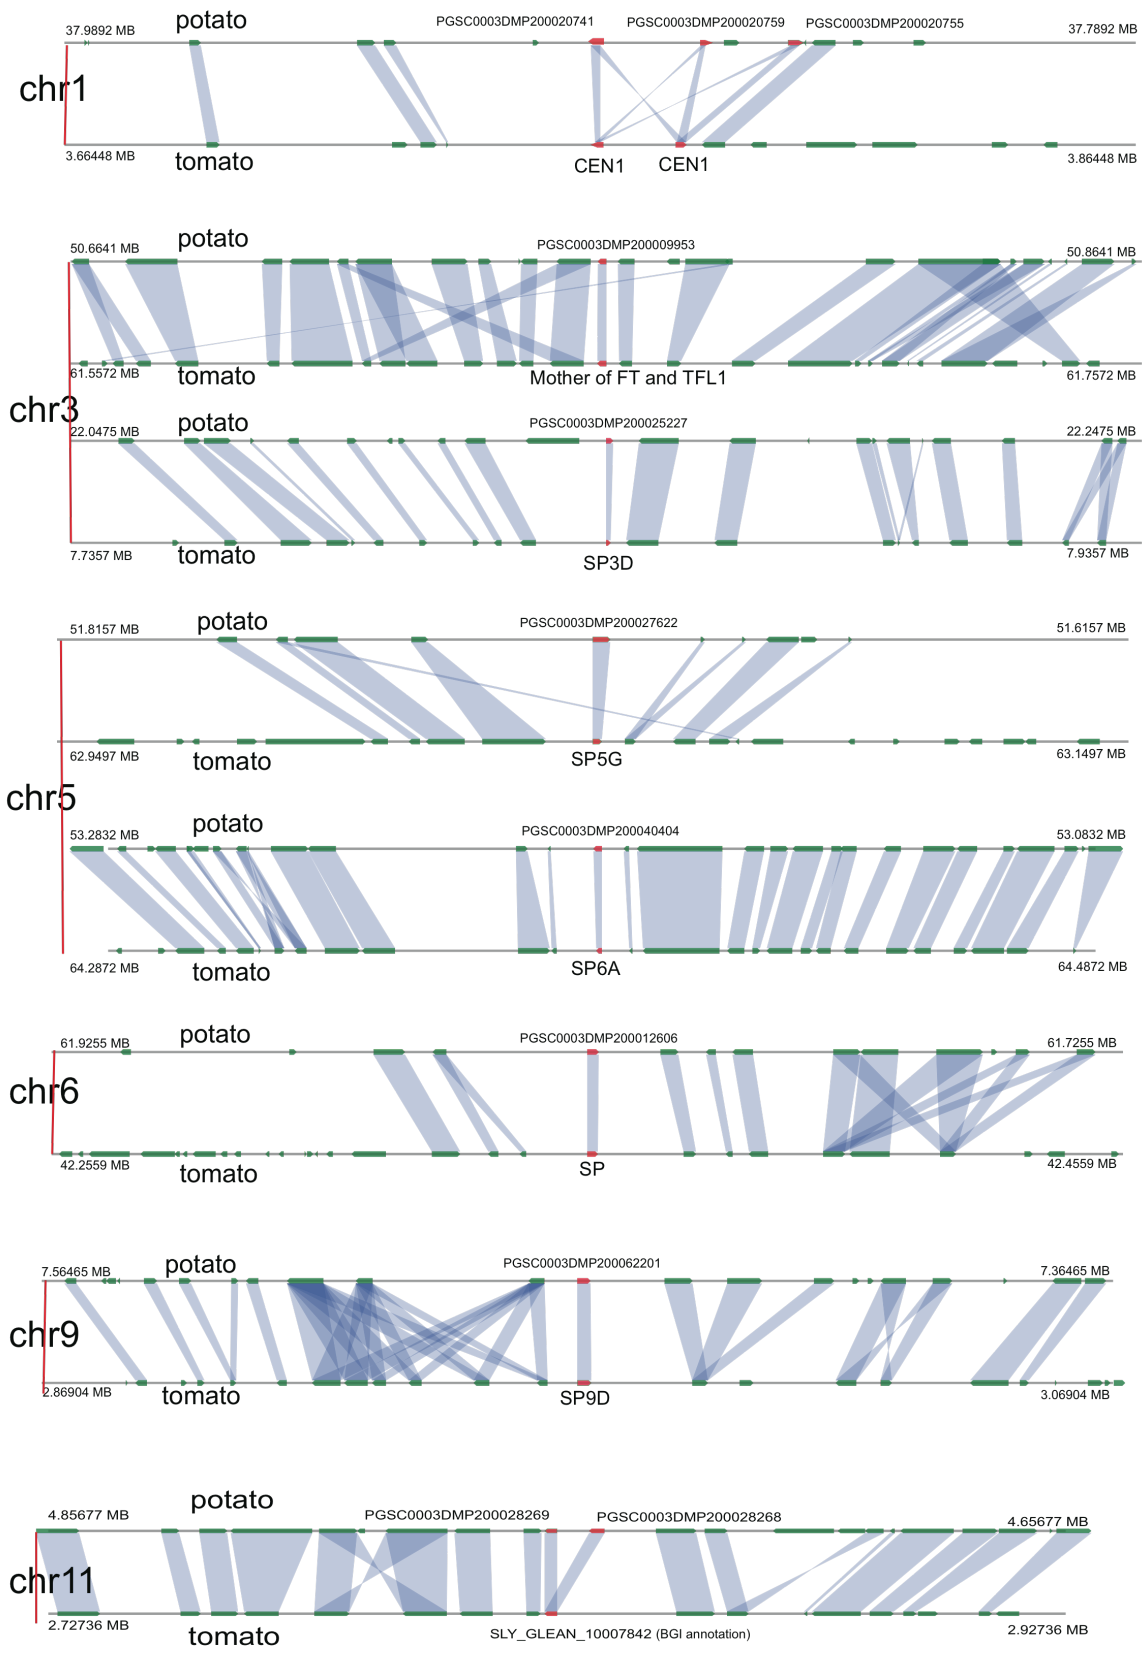

**Supplementary Figure 7.** SP/FT gene family distribution in potato and tomato. Homologous relationships between potato and tomato chromosomes for the SP/FT genes (red) and other protein coding genes (green) are linked by light blue blocks.

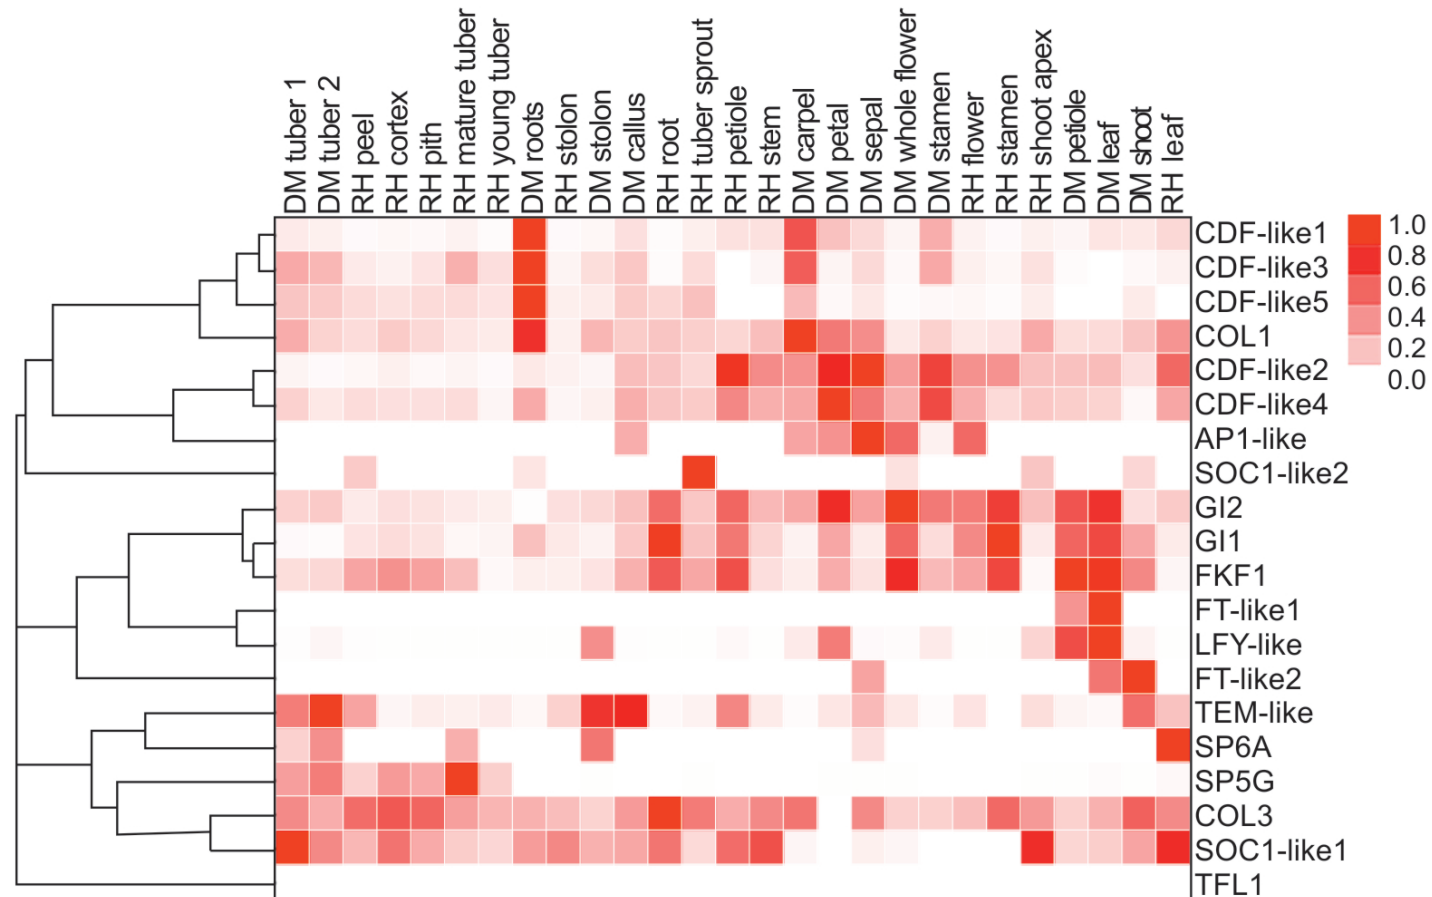

**Supplementary Figure 8.** Expression of selected genes involved in control of tuber formation. A dendrogram of the gene expression clustering is shown on the left and the clustering of tissues is as in Fig. 3. Abbreviation of genes is as follows: CDF-like1: Cycling DOF-like; COL: Constans-like; AP1-like: Apetala 1-like; SOC1 like: Suppressor of Constans 1 like; GI1-2: Gigantea 1-2; FKF1: Flavin-binding, Kelch Repeat, F-box 1; FT-like: Flowering locus T-like; LFY-like; Leafy-like; TEM-like; Tempranillo-like; SP6A: Self-pruning 6A (FT-homologue controlling tuber formation); SP5G: Self-pruning 5G (FT-homologue possibly controlling sprouting); TFL1: Terminal Flower 1.

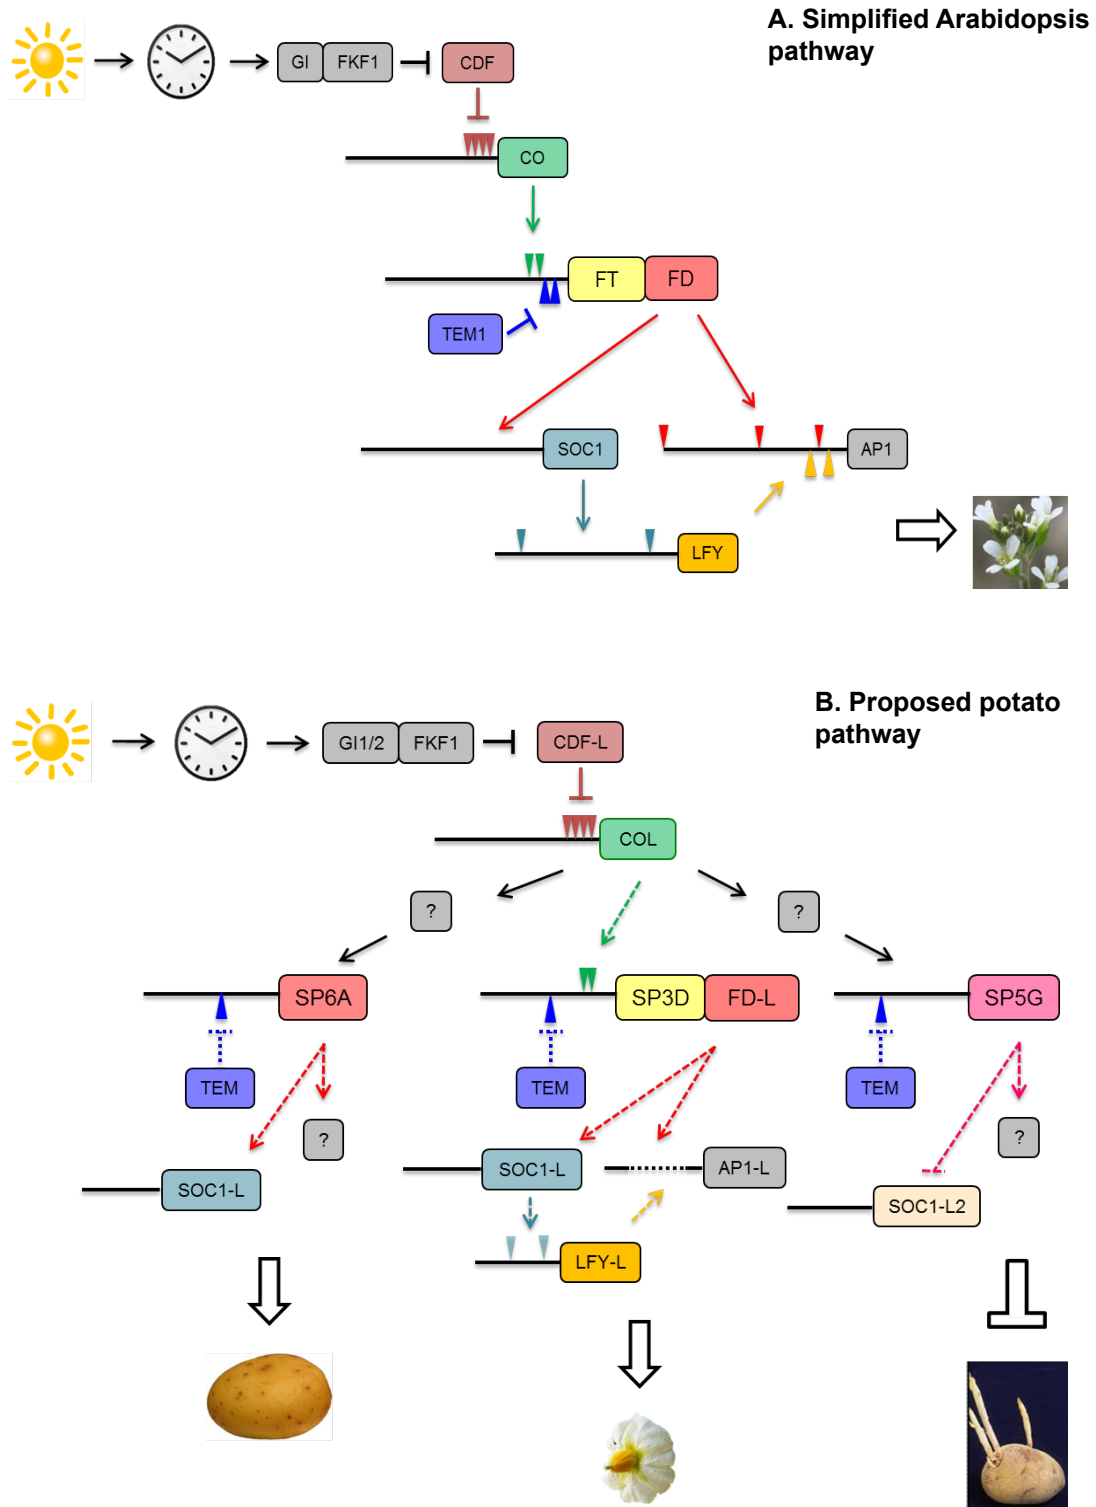

**Supplementary Figure 9. Proposed roles of FT homologues in potato.** A, Simplified Arabidopsis pathway, redrawn according to Michaels (ref. 57 in Supplemental Text). B, Proposed potato pathway. SP3D regulates flowering time, SP6A regulates tuber initiation and SP5G represses sprouting. A functional homolog of FD-L exists in potato (S. Prat, personal communication).

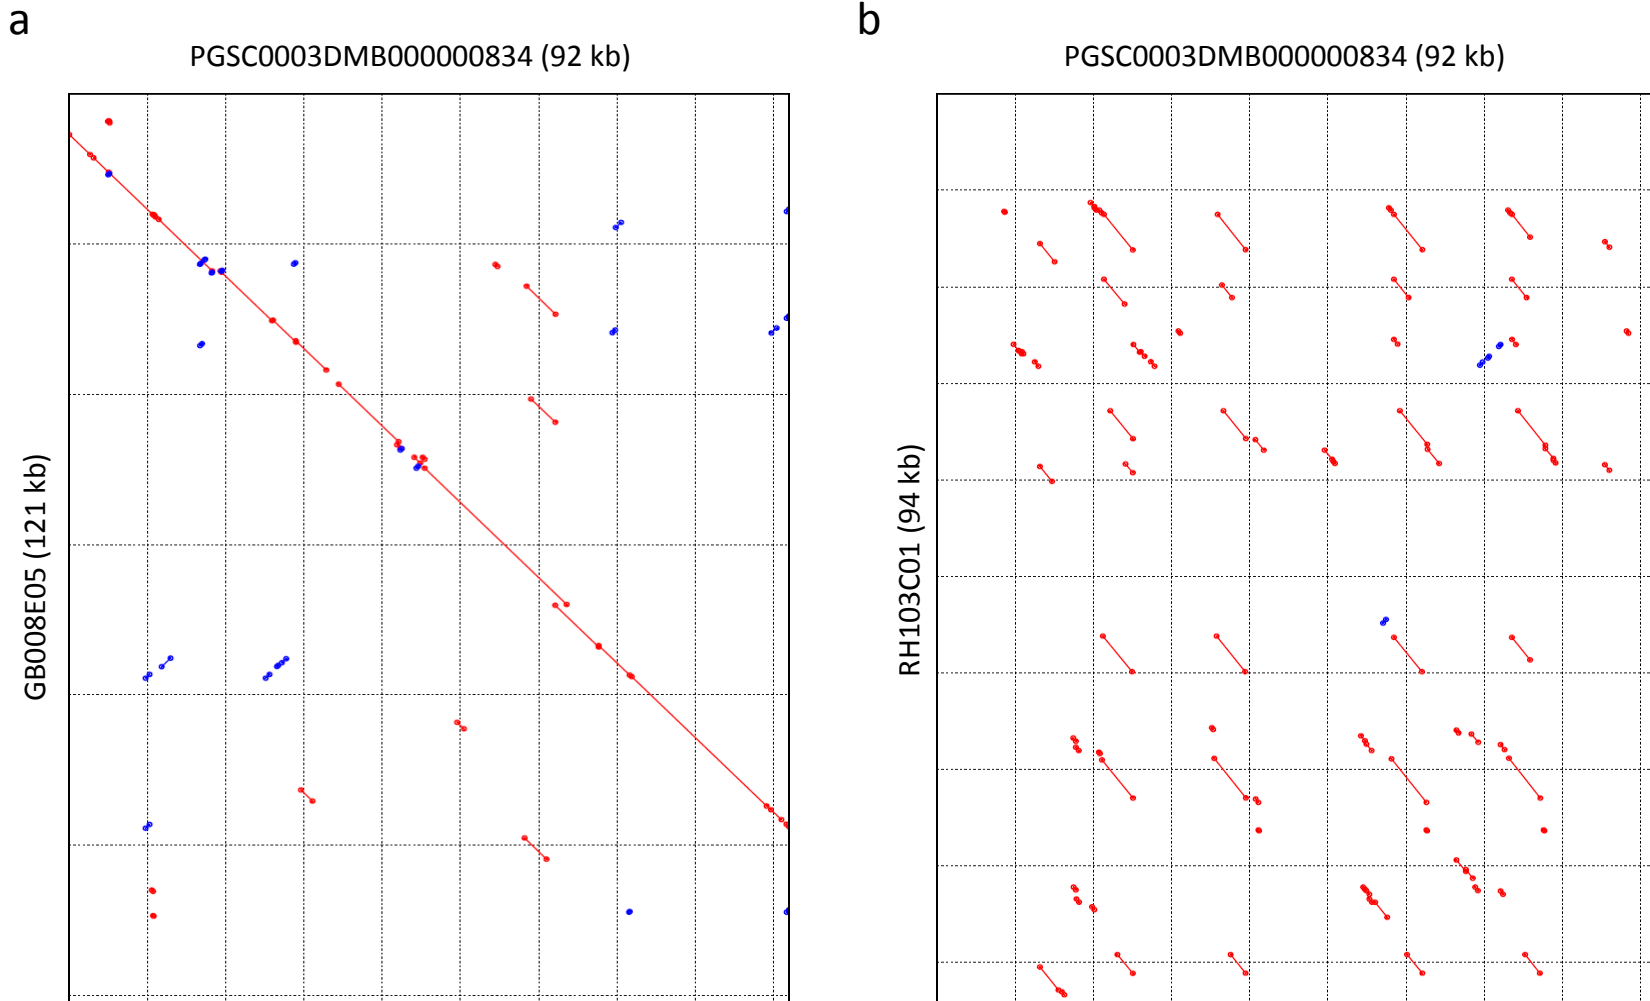

**Supplementary Figure 10:** Sequence alignment plots showing allelic diversity in the R1 disease resistance gene cluster on chromosome 5. **a**, BAC GB008E05 from the {0} haplotype of genotype RH is colinear with DM superscaffold PGSC0003DMB000000834. **b**, BAC RH103C01 from the corresponding {1} haplotype in genotype RH is not colinear with DM superscaffold PGSC0003DMB000000834.

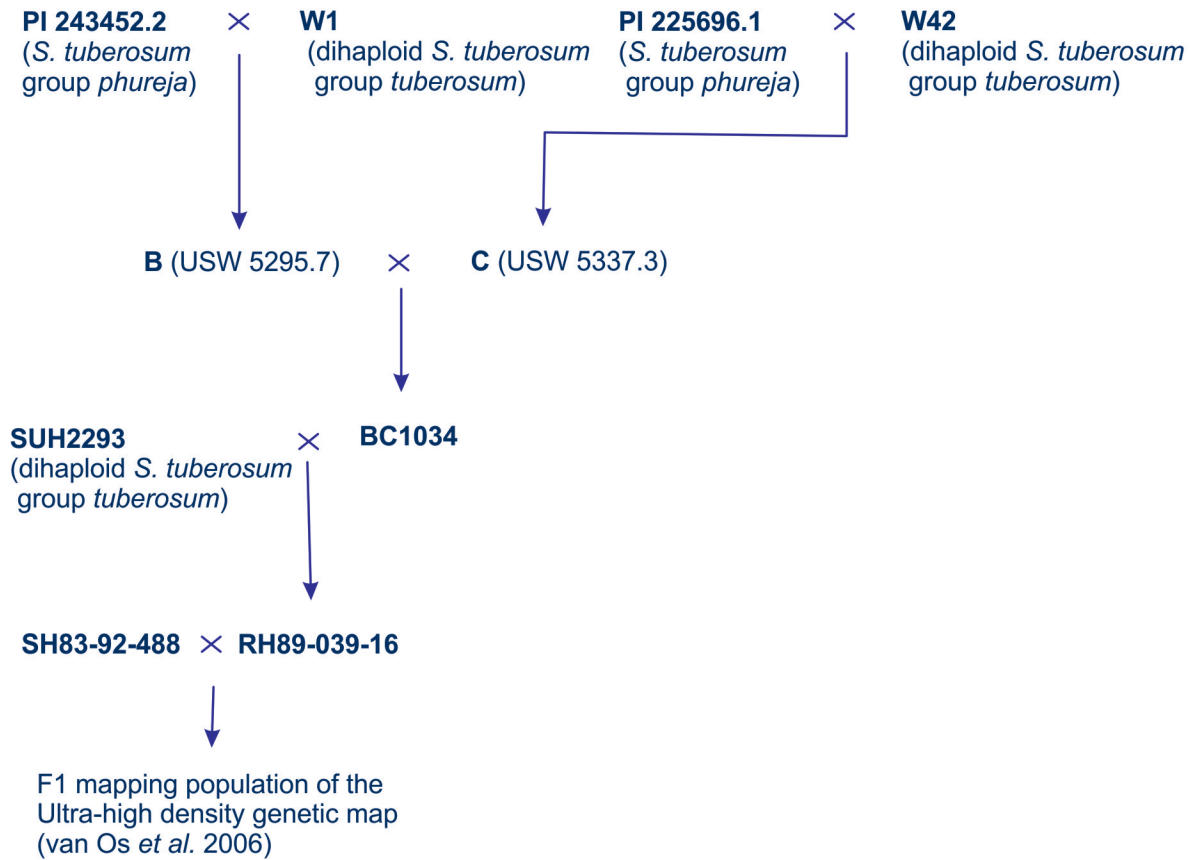

**Supplementary Figure 11. Pedigree of RH89-039-16**





**Supplementary Figure 11. Pedigree of RH89-039-16**

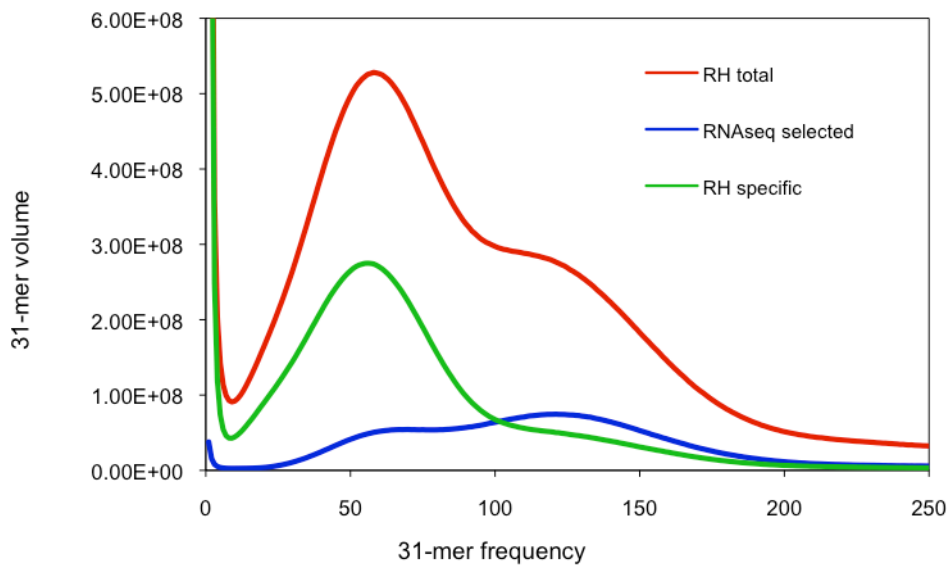

**Supplementary Figure 12.** Illumina K-mer (with  $K=31$ ) volume graphs of the fraction of K-mers unique to RH (green), the RH K-mers selected by the RNASeq data (blue) compared to the total K-mers (red). In these figures, the volume of K-mers in the respective Illumina datasets (Y axis) is plotted against the frequency at which they occur (X axis). The left-hand, truncated, peak at low frequency yet high volume represents K-mers containing essentially random sequencing errors, while the right-hand distribution represents proper (putatively error free) data. The distribution exhibits clear bi-modality caused by heterozygosity. Homozygous K-mers on the right-hand side of the distribution occur at twice the frequency of heterozygous K-mers on the left-hand side. The green graph was obtained by removing all DM K-mers from the RH data, thus resulting in a histogram for K-mers unique to RH. The relatively lower right-hand shoulder in this graph illustrates that sequences differing between DM and RH also have a predisposition to differ between alleles of RH. The blue graph was obtained by using the RNA-seq data to select K-mers from the WGS dataset. The large shift in relative heights of the peaks underlying the bimodal distribution (towards more homozygosity) illustrates that exonic sequences exhibit a much higher level of conservation between alleles in RH.

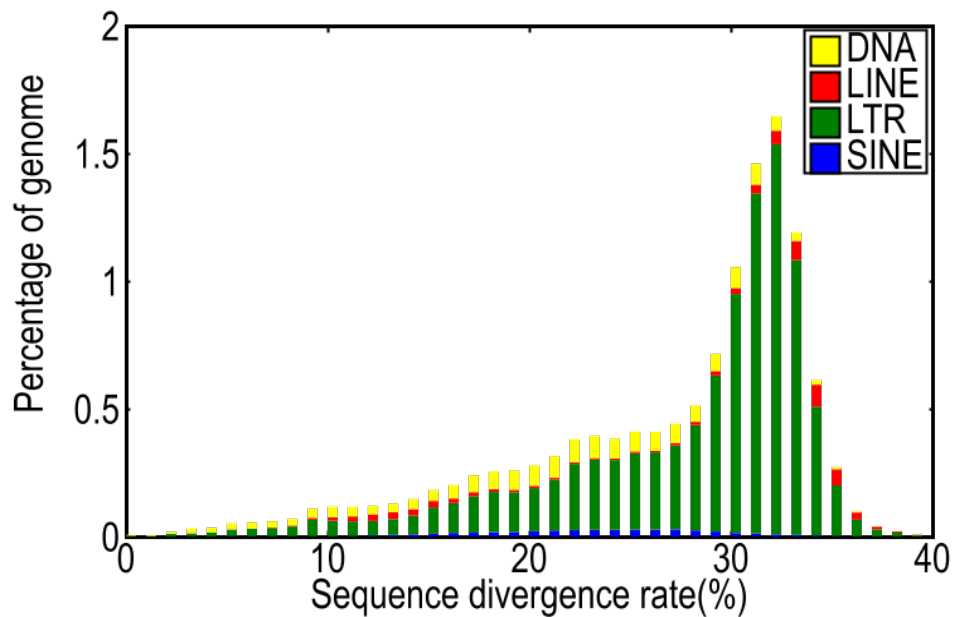

**Supplementary Figure 13.** Distribution of divergence rate for different types of transposable elements generated from alignments of potato transposable elements identified via RepeatMasker against entries in the Repbase library. Divergence rate is shown on the x-axis and the frequency of occurrence in the genome shown on the y-axis. DNA: DNA elements; LINE: Long interspersed nuclear elements; LTR: Long Terminal Repeat transposable element; SINE: Short interspersed nuclear elements.

a

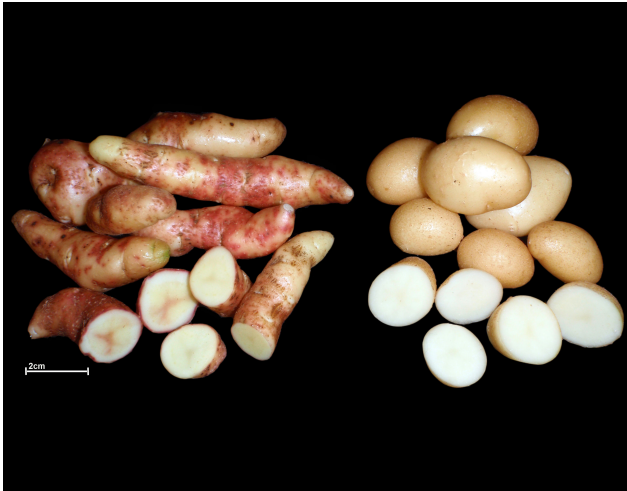

b

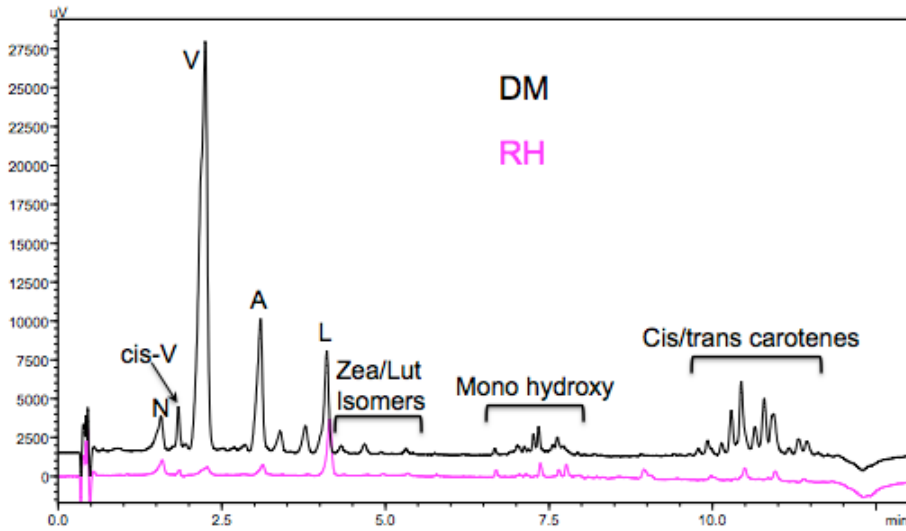

c

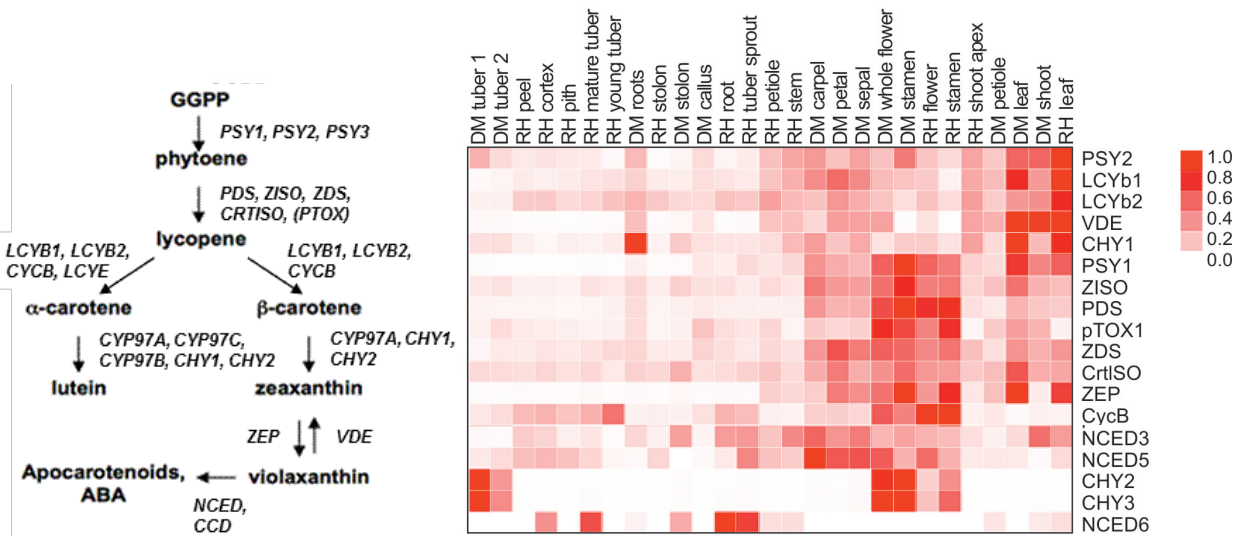

**Supplementary Figure 14 a**, Photograph of tubers from DM (left) and RH (right). **b**, HPLC analysis of tuber carotenoids. Pigments were extracted, separated and identified by spectral characteristics and co-migration with purified standards. The trace shown is at 450nm using equal amounts of tissue from the two lines. N, neoxanthin; cis-V and V, cis- and trans-violaxanthin, respectively; A, antheraxanthin; L, lutein; Zea/Lut isomers, various cis isomers of lutein and zeaxanthin; Mono hydroxy, a complex mixture of alpha, beta and delta-carotene isomers that migrate in a region containing cyclized carotenes with a single hydroxyl group; Cis/trans carotenes, complex mixture of various cyclized isomers (e.g., alpha, beta, delta) carotenes and uncyclized (e.g., zeta-carotene, neurosporene, phytofluene) carotenes. **c**, A simplified carotenoid biosynthesis pathway is shown to the left. Tissue specific expression of genes participating in carotenoid biosynthesis shown as a heat-map on the right. Level of expression is indicated by shades of red, where white indicates no expression. (PSY=phytoene synthases; PDS= phytoene desaturase; ZDS= zeta-carotene desaturase; ZISO= 9,15,9'-tri-cis-zeta-carotene isomerase; CrtISO=7,9,7',9'-tetra-cis-lycopene isomerase; LCYb, CYCb=lycopene beta-cyclases; LCYe=lycopene epsilon-cyclase; CYP=P450 hydroxylases; CHY=non-heme hydroxylases; ZEP=zeaxanthin epoxidase; VDE=violaxanthin deepoxidase; pTOX=alternative oxidase; NCED, CCD=carotenoid cleavage enzymes.

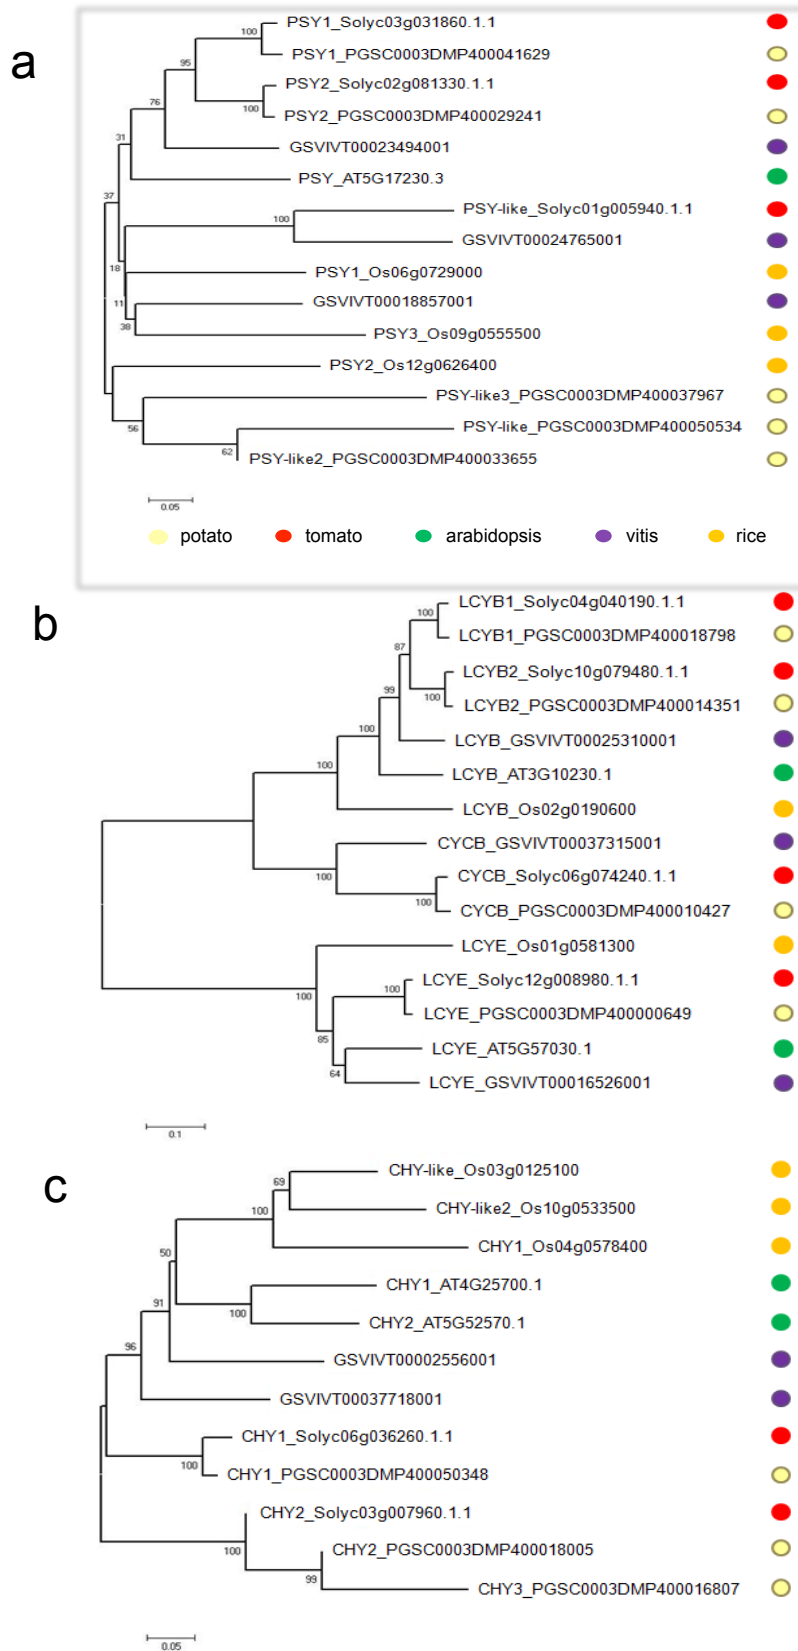

**Supplementary Figure 15.** ClustalW dendrograms of **a**, Phytoene Synthases, **b**, Lycopene Cyclases and **c**, Non-heme hydroxylases, respectively, from different sequenced plant genomes.

**Supplementary Table 1. Statistics of repetitive elements in the DM genome assembly and DM BAC/Fosmid end sequences.****DM Genome Assembly**

| Type    | Rebase TEs  |             | TE proteins |             | De novo     |             | Combined TEs |             |
|---------|-------------|-------------|-------------|-------------|-------------|-------------|--------------|-------------|
|         | Length (Bp) | % in genome | Length (Bp) | % in genome | Length (Bp) | % in genome | Length (Bp)  | % in genome |
| DNA     | 12,361,720  | 1.70        | 2,136,101   | 0.29        | 23,710,499  | 3.26        | 28,651,825   | 3.94        |
| LINE    | 4,672,437   | 0.64        | 2,625,786   | 0.36        | 13,009,895  | 1.79        | 16,363,155   | 2.25        |
| SINE    | 2,891,285   | 0.40        | 0           | 0.00        | 3,388,813   | 0.47        | 4,688,731    | 0.64        |
| LTR     | 70,578,204  | 9.70        | 5,005,519   | 0.69        | 207,479,333 | 28.52       | 214,148,094  | 29.44       |
| Other   | 9,447       | 0.00        | 0           | 0.00        | 0           | 0.00        | 9,447        | 0.00        |
| Unknown | 96,781      | 0.01        | 2,670       | 0.00        | 202,301,562 | 27.81       | 202,374,962  | 27.82       |
| Total   | 89,972,826  | 12.37       | 5,183,930   | 0.71        | 444,197,765 | 61.06       | 452,451,253  | 62.20       |

**DM BAC/Fosmid end sequences**

| Type    | Rebase TEs  |             | TE proteins |             | De novo     |             | Combined TEs |             |
|---------|-------------|-------------|-------------|-------------|-------------|-------------|--------------|-------------|
|         | Length (Bp) | % in genome | Length (Bp) | % in genome | Length (Bp) | % in genome | Length (Bp)  | % in genome |
| DNA     | 1,729,250   | 1.34        | 859,167     | 0.66        | 3,176,051   | 2.45        | 4,507,300    | 3.48        |
| LINE    | 1,034,624   | 0.80        | 1,123,126   | 0.87        | 2,532,620   | 1.96        | 3,830,366    | 2.96        |
| SINE    | 335,073     | 0.26        | 0           | 0.00        | 529,547     | 0.41        | 667,484      | 0.52        |
| LTR     | 13,762,345  | 10.63       | 13,440,745  | 10.39       | 35,941,033  | 27.77       | 49,701,663   | 38.40       |
| Other   | 816         | 0.00        | 0           | 0.00        | 0           | 0.00        | 816          | 0.00        |
| Unknown | 12,625      | 0.01        | 0           | 0.00        | 40,618,757  | 31.38       | 40,627,225   | 31.39       |
| Total   | 16,783,357  | 12.97       | 15,422,760  | 11.92       | 80,883,474  | 62.50       | 96,860,821   | 74.84       |

**Supplementary Table 2. Summary of the differences between the BAC sequences and their equivalent scaffold sequences**

| BAC Accession No. | BAC Length, bp <sup>1</sup> | Superscaffold ID/ Coordinates                                                                    | Equivalent scaff. Length | Nr. of Ns in the equiv. Scaffold length | Alignment length, bp <sup>2</sup> | Covered by BACs, bp <sup>3</sup> | Covered by scaffolds, bp <sup>3</sup> | Indel (>2) <sup>4</sup> | Mismatch (>2) <sup>5</sup> | Single nucleotide changes A>T, A>C, etc. <sup>6</sup> | Mononucleotide Stretch <sup>7</sup> |
|-------------------|-----------------------------|--------------------------------------------------------------------------------------------------|--------------------------|-----------------------------------------|-----------------------------------|----------------------------------|---------------------------------------|-------------------------|----------------------------|-------------------------------------------------------|-------------------------------------|
| FR823288          | 131,182                     | PGSC0003DMB000000296<br>455223 to 586128                                                         | 130,906                  | 2,779                                   | 131,440                           | 131,178                          | 128,127                               | 6                       | 3                          | 19                                                    | 11                                  |
| FR823285          | 114,526                     | PGSC0003DMB000000296<br>585029 to 699531                                                         | 114,503                  | 993                                     | 115,004                           | 114,517                          | 113,510                               | 16                      | 22                         | 47                                                    | 15                                  |
| AC243868          | 120,741                     | PGSC0003DMB000000026<br>939714 to 1065823                                                        | 126,110                  | 6,322                                   | 121,251                           | 120,641                          | 119,788                               | 17                      | 8                          | 45                                                    | 29                                  |
| AC243867          | 79,125                      | PGSC0003DMB000000026<br>1792345 to 1873678                                                       | 81,334                   | 2,665                                   | 79,407                            | 78,917                           | 78,669                                | 11                      | 0                          | 14                                                    | 5                                   |
| AC243866          | 114,565                     | PGSC0003DMB000000214<br>181721 to 295662                                                         | 113,942                  | 407                                     | 114,634                           | 114,464                          | 113,535                               | 7                       | 7                          | 17                                                    | 6                                   |
| AC243865          | 105,923                     | PGSC0003DMB000000062<br>1531022 to 1643651                                                       | 112,630                  | 3,452                                   | 109,966                           | 105,923                          | 109,178                               | 8                       | 7                          | 27                                                    | 6                                   |
| FR823286          | 101,818                     | PGSC0003DMB000000042<br>2323834 to 2455299                                                       | 131,466                  | 1,333                                   | 131,908                           | 101,818                          | 130,133                               | 24                      | 12                         | 31                                                    | 37                                  |
| AC243869          | 95,552                      | PGSC0003DMB000000055<br>326909 to 424557                                                         | 97,649                   | 5,804                                   | 97,217                            | 95,452                           | 91,845                                | 42                      | 3                          | 45                                                    | 16                                  |
| FR823287          | 77,214                      | PGSC0003DMB000000707<br>1 to 49690<br>PGSC0003DMB000000964<br>1 to 25401<br>PGSC0003DMB000000690 | 79,295                   | 4,304                                   | 82,023                            | 77,214                           | 74,991                                | 43                      | 59                         | 178                                                   | 47                                  |
| FR823289          | 69,953                      | 7490 to 82661                                                                                    | 75,172                   | 3,656                                   | 72,066                            | 69,916                           | 71,516                                | 22                      | 2                          | 5                                                     | 17                                  |
| <b>Total</b>      | <b>1,010,599</b>            | -                                                                                                | <b>1,063,007</b>         | <b>31,715</b>                           | <b>1,054,916</b>                  | <b>1,010,040</b>                 | <b>1,031,292</b>                      | <b>196</b>              | <b>123</b>                 | <b>428</b>                                            | <b>189</b>                          |

<sup>1</sup> BAC length as calculated from the final BAC assembly

<sup>2</sup> Alignment length calculated from ClustalW2 alignment of compressed (unresolved nucleotides excluded) BAC and superscaffold sequences.

<sup>3</sup> Unresolved nucleotides (including inserted N-runs) for the scaffold and BAC sequences respectively were subtracted from the alignment length to calculate the coverage values presented in subsequent two columns.

<sup>4</sup> Insertions and Deletions of greater than 2 nucleotides between the two sequences in the alignment. Adjusted for gaps between contigs in PhaseII BACs

<sup>5</sup> Runs of mismatches of 2 or more nucleotides between the sequences in the aligning segments



<sup>6</sup> Discrete single nucleotide differences only. Includes differences due to single nucleotide gaps and ambiguous bases in one sequence relative to the other

<sup>7</sup> Mononucleotide runs of greater than 2 nucleotides which differ by at least one nucleotide between the sequences. Excludes N runs.

\*Figures based on comparison of the BAC to a composite sequence derived from the equivalent regions of two independant superscaffolds.

**Supplementary Table 3. Mapping of BAC and fosmid paired end sequences of the genome assembly**

| <b>On Scaffolds</b>         |                |         |                   |         |                |         |
|-----------------------------|----------------|---------|-------------------|---------|----------------|---------|
|                             | <b>DM BACs</b> |         | <b>DM fosmids</b> |         | <b>RH BACs</b> |         |
| No. matepairs:              | 62,975         | 100.00% | 26,956            | 100.00% | 64,267         | 100.00% |
| on different scaffolds      | 7,762          | 12.33%  | 2,137             | 7.93%   | 5,576          | 8.68%   |
| on same scaffold            | 20,531         | 32.60%  | 12,174            | 45.16%  | 7,656          | 11.91%  |
| incorrect orientation       | 33             | 0.05%   | 9                 | 0.03%   | 53             | 0.08%   |
| incorrect direction         | 33             | 0.05%   | 19                | 0.07%   | 97             | 0.15%   |
| too far*                    | 0              | 0.00%   | 3                 | 0.01%   | 2              | 0.00%   |
| Potential misassemblies     | 66             | 0.10%   | 31                | 0.12%   | 152            | 0.24%   |
| <b>On Superscaffolds</b>    |                |         |                   |         |                |         |
|                             | <b>DM BACs</b> |         | <b>DM fosmids</b> |         | <b>RH BACs</b> |         |
| No. matepairs:              | 62,975         | 100.00% | 26,956            | 100.00% | 64,267         | 100.00% |
| on different superscaffolds | 3,193          | 5.07%   | 813               | 3.02%   | 2,091          | 3.25%   |
| on same superscaffold       | 25,040         | 39.76%  | 13,479            | 50.00%  | 11,065         | 17.22%  |
| incorrect orientation       | 63             | 0.10%   | 10                | 0.04%   | 125            | 0.19%   |
| incorrect direction         | 56             | 0.09%   | 39                | 0.14%   | 102            | 0.16%   |
| too far*                    | 7              | 0.01%   | 14                | 0.05%   | 13             | 0.02%   |
| Potential misassemblies     | 126            | 0.20%   | 63                | 0.23%   | 240            | 0.37%   |

\*Cutoff used were: >300 Kb for BACs and >60 Kb for fosmids.

Ends were cleaned from duplicates and mapped on the assembly using Blastn. Stringent parameters (minimum end length 300bp, identity > 98%, end coverage > 95%, and only one hit/end) were used to obtain unambiguous mapping.

**Supplementary Table 4. List of tissues, genotypes, and read lengths for whole transcriptome sequencing.**

| Genotype      | Tissue Name | Tissue Description                                                      | Single Reads | Paired Reads | Total Reads: Single Reads | Paired Reads | Total Reads: Paired Reads |
|---------------|-------------|-------------------------------------------------------------------------|--------------|--------------|---------------------------|--------------|---------------------------|
| DM1-3 516 R44 | ABA         | Whole plants, treated with 50 uM ABA, 24 hr                             | 36 bp        |              | 16,941,649                |              |                           |
| DM1-3 516 R44 | BABA        | Detached leaves, elicitor (BABA) pooled at 24 h, 48 hr, 72 hr           | 36 bp        |              | 33,733,539                |              |                           |
| DM1-3 516 R44 | BAP         | Whole plants, treated with 10 uM BAP, 24 hr                             | 36 bp        |              | 25,112,442                |              |                           |
| DM1-3 516 R44 | BTH         | Detached leaves, elicitor (BTH) pooled at 24 h, 48 hr, 72 hr            | 36 bp        |              | 28,564,425                |              |                           |
| DM1-3 516 R44 | Callus      | Callus (10 and 11 week old) generated from leaves and stems             | 36 bp        | 105/85 bp    | 15,852,698                | 105/85 bp    | 25,128,520                |
| DM1-3 516 R44 | Carpels     | Carpels                                                                 | 36 bp        |              | 20,723,777                |              |                           |
| DM1-3 516 R44 | Control     | Detached leaves, control for biotic stress pooled at 24 h, 48 hr, 72 hr | 36 bp        |              | 27,792,294                |              |                           |

|               |                             |                                                            |       |           |            |           |            |
|---------------|-----------------------------|------------------------------------------------------------|-------|-----------|------------|-----------|------------|
| DM1-3 516 R44 | Control                     | Whole plants, Control for salt and mannitol treatment      | 36 bp |           | 22,044,484 |           |            |
| DM1-3 516 R44 | Control                     | Whole plants, Control for IAA, GA3, BAP, and ABA treatment | 36 bp |           | 18,874,010 |           |            |
| DM1-3 516 R44 | Control                     | Whole plants, Control for 35 C treatment                   | 36 bp | 105/85 bp | 17,560,056 | 105/85 bp | 39,071,562 |
| DM1-3 516 R44 | Fruit mesocarp and endocarp | DM x A132-238, 4 week mesocarp and endocarp                | 36bp  |           | 37,090,514 |           |            |
| DM1-3 516 R44 | GA3                         | Whole plants, treated with 50 uM GA3, 24 hr                | 36 bp |           | 19,756,489 |           |            |
| DM1-3 516 R44 | Heat                        | Whole plants, heat treated (35 C), 24 hr, dark             | 36 bp |           | 29,974,942 |           |            |
| DM1-3 516 R44 | IAA                         | Whole plants, treated with 10 uM IAA, 24 hr                | 36 bp |           | 20,070,861 |           |            |
| DM1-3 516 R44 | Immature whole fruit        | DM x P055-14, 2.5 week immature whole fruit                | 36bp  |           | 38,285,431 |           |            |

|               |                     |                                                                  |       |            |            |       |            |
|---------------|---------------------|------------------------------------------------------------------|-------|------------|------------|-------|------------|
| DM1-3 516 R44 | Leaves              | No treatment                                                     | 36 bp | 26,157,013 |            |       |            |
| DM1-3 516 R44 | Mannitol            | Whole plants, treated with 260 $\mu$ M Mannitol, 24 hr           | 36 bp | 17,540,271 |            |       |            |
| DM1-3 516 R44 | Mature whole fruit  | DM x S701-2, 6.5 week whole fruit                                | 36bp  | 39,225,431 |            |       |            |
| DM1-3 516 R44 | <i>P. infestans</i> | Detached leaves, pathogen challenge pooled at 24 h, 48 hr, 72 hr | 36 bp | 46,120,230 |            |       |            |
| DM1-3 516 R44 | Petals              | Petals                                                           | 36 bp | 29,066,497 |            |       |            |
| DM1-3 516 R44 | Petioles            | Petioles                                                         | 36 bp | 76 bp      | 22,225,870 | 76 bp | 49,114,314 |
| DM1-3 516 R44 | Roots               | Roots                                                            | 36 bp | 76 bp      | 20,044,161 | 76 bp | 91,723,550 |
| DM1-3 516 R44 | Salt                | Whole plants, treated with 150 mM NaCl, 24 hr                    | 36 bp | 20,536,983 |            |       |            |

|               |                      |                                                  |       |           |            |           |            |
|---------------|----------------------|--------------------------------------------------|-------|-----------|------------|-----------|------------|
| DM1-3 516 R44 | Sepals               | Sepals                                           | 36 bp |           | 16,291,966 |           |            |
| DM1-3 516 R44 | Shoots               | Shoots                                           | 36 bp |           | 25,824,317 |           |            |
| DM1-3 516 R44 | Stamens              | Stamens                                          | 36 bp |           | 20,037,385 |           |            |
| DM1-3 516 R44 | Stolons              | Some stolons were above ground and were green    | 36 bp | 76 bp     | 15,957,004 | 76 bp     | 24,982,942 |
| DM1-3 516 R44 | Tubers, Sample 1     | Whole tubers, Harvested 5-5-09                   | 36 bp |           | 16,004,340 |           |            |
| DM1-3 516 R44 | Tubers, Sample 2     | Whole tubers, Harvested 6-1-09                   | 36 bp | 105/85 bp | 20,025,196 | 105/85 bp | 41,459,674 |
| DM1-3 516 R44 | Whole Mature Flowers | Whole mature flowers                             | 36 bp | 76 bp     | 26,317,607 | 76 bp     | 47,829,268 |
| DM1-3 516 R44 | Wounding, Primary    | Wounded bottom two leaflets, 24 hr post wounding | 36 bp |           | 25,329,361 |           |            |

|               |                     |                                                                                  |       |           |            |           |            |
|---------------|---------------------|----------------------------------------------------------------------------------|-------|-----------|------------|-----------|------------|
| DM1-3 516 R44 | Wounding, secondary | Non-wounded leaflets, 24 hr post wounding                                        | 36 bp | 105/85 bp | 17,019,337 | 105/85 bp | 37,446,274 |
| RH89-039-16   | Flower              | Whole flower buds pre- and post-anthesis                                         | 36 bp |           | 6,133,946  |           |            |
| RH89-039-16   | Leaf                | 1st and 2nd fully expanded leaf                                                  | 36 bp |           | 6,694,818  |           |            |
| RH89-039-16   | Mature Tuber        | Large tuber with average size range between 2.5 and 3.5 cm (tuber filling stage) | 36 bp |           | 6,291,767  |           |            |
| RH89-039-16   | Petiole             | Petiole of 1st, 2nd and 3rd fully expanded leaf                                  | 36 bp |           | 6,548,759  |           |            |
| RH89-039-16   | Root                | Collected Root tissue from soil grown plants                                     | 36 bp |           | 12,209,179 |           |            |
| RH89-039-16   | Shoot apex          | Top part of the shoot with apical meristem and young leafs                       | 36 bp |           | 6,634,548  |           |            |
| RH89-039-16   | Stamen              | Intact stamens collected from fully developed open flowers                       | 36 bp |           | 12,083,841 |           |            |

|             |                             |                                                                                                                            |       |            |
|-------------|-----------------------------|----------------------------------------------------------------------------------------------------------------------------|-------|------------|
| RH89-039-16 | Stem                        | Internodes from the main shoot, young and older internodes                                                                 | 36 bp | 6,276,156  |
| RH89-039-16 | Stolon                      | Non-tuberizing stolon tips (2 - 6 cm in length)                                                                            | 36 bp | 6,345,392  |
| RH89-039-16 | Tuber cortex                | Section of fully matured tubers between vascular tissues and epidermis                                                     | 36 bp | 11,286,464 |
| RH89-039-16 | Tuber peel                  | Outer cell layers (2-4mm) of fully matured tuber including phellem, epidermis and additional cell layers                   | 36 bp | 9,626,503  |
| RH89-039-16 | Tuber pith                  | Central pith of fully matured tubers was collected                                                                         | 36 bp | 12,187,256 |
| RH89-039-16 | Tuber sprout                | Tubers were stored at RT in the dark until significant sprouting was observed (3-4 months)                                 | 36 bp | 11,393,776 |
| RH89-039-16 | Water stressed leaf         | Soil grown plants were denied water for a period of 2 days afterw high samples were collected from 2nd to 4th wilting leaf | 36 bp | 12,281,440 |
| RH89-039-16 | Whole <i>in vitro</i> plant | Plants were grown in MS20 medium, 4 week old plantlets including roots were harvested                                      | 36 bp | 8,315,792  |



|             |             |                                                   |       |           |
|-------------|-------------|---------------------------------------------------|-------|-----------|
| RH89-039-16 | Young Tuber | Small developing tuber with size of<br>around 1cm | 36 bp | 6,066,010 |
|-------------|-------------|---------------------------------------------------|-------|-----------|

---

### Supplementary Table 5. Classification of Prediction at the Transcript and Gene Level

|                                         | Number | Percentage |
|-----------------------------------------|--------|------------|
| Transcripts with:                       |        |            |
| Protein Support <sup>a</sup>            | 45,790 | 81.50%     |
| EST &/or RNA-Seq Support <sup>b,c</sup> | 38,250 | 68.04%     |
| Protein & EST &/or RNA-Seq Support      | 34,637 | 61.61%     |
| Protein OR EST &/or RNA-Seq Support     | 49,403 | 87.88%     |
| Protein Support Only                    | 11,153 | 19.84%     |
| EST &/or RNA-Seq Support Only           | 3,613  | 6.43%      |
| Ab initio                               | 6,815  | 12.12%     |
|                                         | 56,218 |            |
| Genes with:                             |        |            |
| Protein Support                         | 29,901 | 76.61%     |
| EST &/or RNA-Seq Support                | 23,617 | 60.51%     |
| Protein & EST &/or RNA-Seq Support      | 21,036 | 53.90%     |
| Protein OR EST &/or RNA-Seq Support     | 32,403 | 83.02%     |
| Protein Support Only                    | 11,153 | 28.57%     |
| EST &/or RNA-Seq Support Only           | 3,086  | 7.91%      |
| Ab initio                               | 3,765  | 9.65%      |

<sup>a</sup> Protein support criterion : identity  $\geq 30\%$ , e value  $< 1 \times 10^{-20}$  for the protein whose length are greater than 150. While for other proteins, the condition  $\text{Identity} \geq (5 + 480 \times (\text{match\_length} \times (-0.32 \times (1 + \exp(\text{match\_length}/1000))))$  based on the reference (Rost, B. (1999).

"Twilight zone of protein sequence alignments." Protein Engineering 12(2): 85-94.)

<sup>b</sup> EST filtering criterion : identity  $\geq 95\%$ , EST coverage  $\geq 90\%$

<sup>c</sup> RNA-seq support criterion is based on the Cufflinks prediction

**Supplementary Table 6. Absolute length, arm ratio and percentage of heterochromatin of individual pachytene chromosome of DM1-3**

| Chr. | Absolute length ( $\mu\text{m}$ ) | Short arm ( $\mu\text{m}$ ) | Long arm ( $\mu\text{m}$ ) | Arm ratio (L/S) | Centromere index | Het. total (%) | Het. SA %      | Het. LA %      | n |
|------|-----------------------------------|-----------------------------|----------------------------|-----------------|------------------|----------------|----------------|----------------|---|
| 1    | 68.2 $\pm$ 9.9                    | 17.6 $\pm$ 2.7              | 50.6 $\pm$ 7.4             | 2.9 $\pm$ 0.2   | 25.9 $\pm$ 1.3   | 27.6 $\pm$ 0.9 | 53.1 $\pm$ 4.5 | 18.7 $\pm$ 2.2 | 5 |
| 2    | 48.0 $\pm$ 2.6                    | 2.1 $\pm$ 0.1               | 45.9 $\pm$ 2.3             | 23.7 $\pm$ 5.7  | 4.3 $\pm$ 1.1    | 25.7 $\pm$ 3.8 | 100 $\pm$ 0.0  | 22.4 $\pm$ 3.3 | 6 |
| 3    | 56.7 $\pm$ 15.0                   | 9.2 $\pm$ 1.2               | 47.4 $\pm$ 14.2            | 5.1 $\pm$ 1.1   | 16.8 $\pm$ 2.8   | 25.7 $\pm$ 4.9 | 49.5 $\pm$ 6.1 | 21.0 $\pm$ 4.8 | 7 |
| 4    | 55.1 $\pm$ 5.7                    | 19.6 $\pm$ 1.7              | 35.5 $\pm$ 4.2             | 1.8 $\pm$ 0.1   | 35.7 $\pm$ 1.6   | 23.6 $\pm$ 3.6 | 33.3 $\pm$ 3.7 | 18.3 $\pm$ 4.5 | 5 |
| 5    | 37.4 $\pm$ 4.7                    | 16.6 $\pm$ 2.1              | 20.8 $\pm$ 2.9             | 1.2 $\pm$ 0.1   | 44.5 $\pm$ 1.9   | 38.1 $\pm$ 4.4 | 42.4 $\pm$ 5.3 | 34.6 $\pm$ 5.0 | 5 |
| 6    | 53.3 $\pm$ 8.4                    | 10.5 $\pm$ 1.9              | 42.8 $\pm$ 6.9             | 4.1 $\pm$ 0.5   | 19.8 $\pm$ 2.0   | 26.3 $\pm$ 3.3 | 52.5 $\pm$ 6.4 | 20.0 $\pm$ 4.1 | 7 |
| 7    | 34.3 $\pm$ 5.9                    | 10.5 $\pm$ 2.6              | 23.7 $\pm$ 3.5             | 2.3 $\pm$ 0.3   | 30.5 $\pm$ 3.0   | 34.0 $\pm$ 3.5 | 44.5 $\pm$ 7.3 | 29.7 $\pm$ 3.8 | 8 |
| 8    | 43.7 $\pm$ 2.6                    | 12.1 $\pm$ 1.0              | 31.6 $\pm$ 2.2             | 2.6 $\pm$ 0.2   | 27.8 $\pm$ 1.9   | 31.7 $\pm$ 2.6 | 50.0 $\pm$ 2.3 | 24.7 $\pm$ 3.0 | 7 |
| 9    | 36.3 $\pm$ 1.6                    | 11.4 $\pm$ 0.5              | 24.9 $\pm$ 1.5             | 2.2 $\pm$ 0.1   | 31.5 $\pm$ 1.5   | 43.2 $\pm$ 2.8 | 46.2 $\pm$ 5.4 | 41.8 $\pm$ 2.5 | 5 |
| 10   | 31.6 $\pm$ 2.8                    | 11.8 $\pm$ 1.0              | 19.8 $\pm$ 1.9             | 1.7 $\pm$ 0.1   | 37.3 $\pm$ 1.2   | 40.6 $\pm$ 3.7 | 48.1 $\pm$ 2.2 | 36.2 $\pm$ 5.7 | 6 |
| 11   | 40.6 $\pm$ 6.3                    | 19.4 $\pm$ 3.2              | 21.2 $\pm$ 3.2             | 1.1 $\pm$ 0.1   | 47.8 $\pm$ 1.6   | 29.7 $\pm$ 5.6 | 39.7 $\pm$ 8.7 | 20.5 $\pm$ 4.2 | 5 |
| 12   | 42.3 $\pm$ 6.4                    | 17.1 $\pm$ 2.8              | 25.2 $\pm$ 3.8             | 1.5 $\pm$ 0.1   | 40.4 $\pm$ 1.8   | 41.0 $\pm$ 4.0 | 27.4 $\pm$ 7.2 | 50.2 $\pm$ 4.4 | 6 |

Het. SA (LA) %: Heterochromatin of the short (long) arm ( $\mu\text{m}$ ) / Length of the short (long) arm ( $\mu\text{m}$ ).

**Supplementary Table 7. Top 50 Pfam domains in non-Asterid and Asterid-specific gene sets.**

**A. Top 50 Pfam domains in non-Asterid-specific potato genes.**

| Pfam    | Function                                                     | Counts |
|---------|--------------------------------------------------------------|--------|
| PF01535 | Pentatricopeptide repeat                                     | 4135   |
| PF00560 | Leucine-rich repeat                                          | 2446   |
| PF00069 | Serine/threonine-protein kinase-like domain                  | 870    |
| PF00400 | WD40 repeat, subgroup                                        | 788    |
| PF00067 | Cytochrome P450                                              | 514    |
| PF00931 | NB-ARC                                                       | 454    |
| PF00249 | Myb, DNA-binding                                             | 373    |
| PF00076 | RNA recognition motif, RNP-1                                 | 363    |
| PF07714 | Serine-threonine/tyrosine-protein kinase                     | 348    |
| PF00646 | F-box domain, cyclin-like                                    | 318    |
| PF00097 | Zinc finger, C3HC4 RING-type                                 | 296    |
| PF00201 | UDP-glucuronosyl/UDP-glucosyltransferase                     | 275    |
| PF08263 | Leucine-rich repeat-containing N-terminal domain, type 2     | 273    |
| PF00847 | Pathogenesis-related transcriptional factor/ERF, DNA-binding | 233    |
| PF00036 | EF-hand                                                      | 218    |
| PF03171 | Oxoglutarate/iron-dependent oxygenase                        | 191    |
| PF00023 | Ankyrin repeat                                               | 174    |
| PF00153 | Mitochondrial substrate/solute carrier                       | 165    |
| PF00005 | ABC transporter-like                                         | 162    |
| PF02458 | Transferase                                                  | 160    |
| PF00319 | Transcription factor, MADS-box                               | 149    |
| PF00168 | C2 calcium-dependent membrane targeting                      | 143    |
| PF02519 | Auxin responsive SAUR protein                                | 140    |
| PF01554 | Multi antimicrobial extrusion protein MatE                   | 134    |
| PF00141 | Haem peroxidase, plant/fungal/bacterial                      | 128    |
| PF00010 | Helix-loop-helix DNA-binding domain                          | 127    |
| PF00004 | ATPase, AAA-type, core                                       | 115    |
| PF02362 | Transcriptional factor B3                                    | 110    |
| PF02365 | No apical meristem (NAM) protein                             | 107    |
| PF00106 | Short-chain dehydrogenase/reductase SDR                      | 104    |
| PF00226 | Heat shock protein DnaJ, N-terminal                          | 102    |
| PF04043 | Pectinesterase inhibitor                                     | 102    |
| PF00083 | General substrate transporter                                | 100    |
| PF00046 | Homeobox                                                     | 99     |
| PF00657 | Lipase, GDSL                                                 | 98     |
| PF03106 | DNA-binding WRKY                                             | 98     |
| PF00514 | Armadillo                                                    | 96     |
| PF00082 | Peptidase S8/S53, subtilisin/kexin/sedolisin                 | 95     |

|         |                                                                        |    |
|---------|------------------------------------------------------------------------|----|
| PF00515 | Tetratricopeptide TPR-1                                                | 92 |
| PF00234 | lant lipid transfer protein/seed storage/trypsin-alpha amylase inhibit | 90 |
| PF00098 | Zinc finger, CCHC-type                                                 | 89 |
| PF00642 | Zinc finger, CCCH-type                                                 | 87 |
| PF01453 | Curculin-like (mannose-binding) lectin                                 | 87 |
| PF00561 | Alpha/beta hydrolase fold-1                                            | 86 |
| PF00190 | Cupin 1                                                                | 85 |
| PF00240 | Ubiquitin                                                              | 85 |
| PF00854 | Oligopeptide transporter                                               | 85 |
| PF01715 | tRNA isopentenyltransferase                                            | 85 |
| PF07734 | F-box associated domain, type 1                                        | 84 |
| PF00481 | Protein phosphatase 2C, N-terminal                                     | 82 |

### B. Top 50 Pfam domains in Asterid-specific potato genes.

| Pfam    | Function                                           | Counts |
|---------|----------------------------------------------------|--------|
| PF02902 | Peptidase C48, SUMO/Sentrin/Ubl1                   | 30     |
| PF03226 | Yippee-like protein                                | 6      |
| PF10536 | Aminotransferase-like, plant mobile domain         | 6      |
| PF02365 | No apical meristem (NAM) protein                   | 5      |
| PF03058 | Systemic acquired resistance protein SAR           | 4      |
| PF00031 | Proteinase inhibitor I25, cystatin                 | 3      |
| PF00098 | Zinc finger, CCHC-type                             | 3      |
| PF01585 | D111/G-patch                                       | 3      |
| PF05938 | Plant self-incompatibility S1                      | 3      |
| PF00168 | C2 calcium-dependent membrane targeting            | 2      |
| PF06839 | Zinc finger, GRF-type                              | 2      |
| PF07145 | Ataxin-2, C-terminal                               | 2      |
| PF07333 | S locus-related glycoprotein 1 binding pollen coat | 2      |
| PF07714 | Serine-threonine/tyrosine-protein kinase           | 2      |
| PF08387 | FBD                                                | 2      |
| PF09331 | Domain of unknown function DUF1985                 | 2      |
| PF12061 | Late blight resistance protein R1                  | 2      |
| PF00249 | Myb, DNA-binding                                   | 1      |
| PF00407 | Bet v I allergen                                   | 1      |
| PF00560 | Leucine-rich repeat                                | 1      |
| PF00646 | F-box domain, cyclin-like                          | 1      |
| PF00931 | NB-ARC                                             | 1      |
| PF02362 | Transcriptional factor B3                          | 1      |
| PF02458 | Transferase                                        | 1      |
| PF02671 | Paired amphipathic helix                           | 1      |
| PF02797 | Chalcone/stilbene synthase, C-terminal             | 1      |
| PF02977 | Proteinase inhibitor I37, carboxypeptidase A       | 1      |

|         |                                                          |   |
|---------|----------------------------------------------------------|---|
| PF03195 | Lateral organ boundaries, LOB                            | 1 |
| PF04043 | Pectinesterase inhibitor                                 | 1 |
| PF04770 | ZF-HD homeobox protein, Cys/His-rich dimerisation domain | 1 |
| PF05498 | Rapid ALkalinization Factor                              | 1 |
| PF07172 | Glycine rich protein                                     | 1 |
| PF07734 | F-box associated domain, type 1                          | 1 |
| PF08263 | Leucine-rich repeat-containing N-terminal domain, type 2 | 1 |
| PF08646 | Replication factor A, C-terminal                         | 1 |
| PF09668 | Peptidase aspartic, eukaryotic predicted                 | 1 |

---

**Supplementary Table 8. Statistics on syntenic blocks within Arabidopsis, grape and potato.**

| Species     | No. of syntenic blocks |       | No. of gene pairs per block |      | No. of genes involved |        |
|-------------|------------------------|-------|-----------------------------|------|-----------------------|--------|
|             | 10Kb                   | 20Kb  | 10Kb                        | 20Kb | 10Kb                  | 20Kb   |
| Arabidopsis | 6,315                  | 4,613 | 19.9                        | 40.3 | 15,272                | 20,075 |
| Grape       | 457                    | 1,617 | 7.7                         | 10   | 3,674                 | 8,354  |
| Potato      | 284                    | 1,811 | 11.6                        | 16.8 | 3,286                 | 10,046 |

Note: Syntenic blocks within each species were detected by Mcscan software. At least five genes are required to call synteny. The intergenic sizes of 10kb and 20kb were used, respectively. The intergenic size is defined as the distance from the stop codon of the former gene to the start codon of the latter one.

**Supplementary Table 9.** RH sequence data of BACs, organized per chromosome. All BACs not assigned to any chromosome were combined into a virtual chromosome 0.

|                         | Chromosome |           |           |            |            |            |           |           |            |           |           |           |            |             | Total |
|-------------------------|------------|-----------|-----------|------------|------------|------------|-----------|-----------|------------|-----------|-----------|-----------|------------|-------------|-------|
|                         | 1          | 2         | 3         | 4          | 5          | 6          | 7         | 8         | 9          | 10        | 11        | 12        | 0          |             |       |
| Number of sequences     | 3,390      | 174       | 430       | 767        | 5,810      | 2,111      | 313       | 167       | 1,366      | 374       | 600       | 752       | 974        | 17,228      |       |
| Total sequence length   | 39,416,252 | 2,150,289 | 6,033,695 | 10,306,172 | 69,044,492 | 22,536,121 | 7,994,542 | 1,598,666 | 13,583,059 | 3,986,047 | 8,118,603 | 6,598,057 | 11,810,820 | 203,176,815 |       |
| Minimum sequence length | 35         | 507       | 286       | 198        | 112        | 84         | 364       | 528       | 29         | 199       | 3         | 32        | 33         | 3           |       |
| Maximum sequence length | 155,460    | 79,841    | 120,722   | 107,847    | 134,177    | 112,064    | 175,778   | 149,534   | 133,864    | 76,465    | 151,103   | 146,171   | 122,038    | 175,778     |       |
| Average sequence length | 11,627     | 12,358    | 14,032    | 13,437     | 11,884     | 10,676     | 25,542    | 9,573     | 9,944      | 10,658    | 13,531    | 8,774     | 12,126     | 11,793      |       |
| Median sequence length  | 6,382      | 6,691     | 6,960     | 8,519      | 6,884      | 5,103      | 9,781     | 4,698     | 4,299      | 5,968     | 5,052     | 1,718     | 6,285      | 6,128       |       |
| N50 sequence length     | 23,393     | 27,542    | 29,007    | 23,411     | 21,303     | 22,057     | 69,670    | 18,160    | 21,987     | 21,596    | 37,414    | 33,061    | 25,332     | 23,896      |       |
| A content               | 32.08      | 32.46     | 32.84     | 32.64      | 32.27      | 32.41      | 32.41     | 32.23     | 32.54      | 31.13     | 32.70     | 32.66     | 31.62      | 32.28       |       |
| C content               | 18.05      | 17.60     | 17.29     | 17.28      | 17.80      | 17.56      | 17.39     | 17.52     | 17.30      | 18.75     | 17.26     | 17.41     | 18.56      | 17.75       |       |
| G content               | 17.90      | 17.50     | 17.17     | 17.35      | 17.71      | 17.60      | 17.49     | 17.58     | 17.52      | 18.64     | 17.29     | 17.33     | 18.40      | 17.70       |       |
| T content               | 31.97      | 32.43     | 32.67     | 32.74      | 32.21      | 32.41      | 32.71     | 32.68     | 32.64      | 31.49     | 32.75     | 32.21     | 31.34      | 32.24       |       |
| N content               | 0.00       | 0.00      | 0.03      | 0.00       | 0.01       | 0.01       | 0.00      | 0.00      | 0.00       | 0.00      | 0.00      | 0.39      | 0.08       | 0.02        |       |



**Supplementary Table 10.** RH sequence data of the superscaffolds generated from the BACs, organized per chromosome. All superscaffolds consisting of BACs not assigned to any chromosome were combined into a virtual chromosome 0.

|                         | Chromosome |           |           |           |            |            |           |           |            |           |           |           |            |             | Total |
|-------------------------|------------|-----------|-----------|-----------|------------|------------|-----------|-----------|------------|-----------|-----------|-----------|------------|-------------|-------|
|                         | 1          | 2         | 3         | 4         | 5          | 6          | 7         | 8         | 9          | 10        | 11        | 12        | 0          |             |       |
| Number of sequences     | 464        | 55        | 92        | 117       | 1,016      | 508        | 94        | 38        | 442        | 109       | 151       | 387       | 295        | 3,768       |       |
| Total sequence length   | 35,194,823 | 2,146,765 | 6,200,479 | 8,603,066 | 55,297,855 | 21,254,289 | 7,680,957 | 1,634,212 | 12,222,574 | 3,627,202 | 7,617,599 | 5,495,571 | 11,098,484 | 178,073,876 |       |
| Minimum sequence length | 35         | 567       | 286       | 198       | 296        | 84         | 366       | 955       | 29         | 199       | 3         | 32        | 33         | 3           |       |
| Maximum sequence length | 642,579    | 358,478   | 294,220   | 690,852   | 643,428    | 448,350    | 502,327   | 262,308   | 367,793    | 198,610   | 292,582   | 312,227   | 435,238    | 690,852     |       |
| Average sequence length | 75,851     | 39,032    | 67,397    | 73,530    | 54,427     | 41,839     | 81,712    | 43,006    | 27,653     | 33,277    | 50,448    | 14,200    | 37,622     | 47,260      |       |
| Median sequence length  | 28,259     | 5,336     | 37,150    | 30,589    | 13,181     | 5,452      | 58,981    | 22,820    | 1,762      | 9,278     | 14,948    | 1,252     | 11,671     | 9,229       |       |
| N50 sequence length     | 174,853    | 123,371   | 140,403   | 150,765   | 167,097    | 133,651    | 147,381   | 99,089    | 126,089    | 111,174   | 133,018   | 124,670   | 115,411    | 143,991     |       |
| A content               | 30.78      | 31.42     | 31.66     | 31.65     | 31.07      | 31.12      | 31.94     | 29.96     | 31.56      | 30.14     | 31.59     | 31.55     | 30.74      | 31.13       |       |
| C content               | 17.26      | 17.07     | 16.67     | 16.66     | 17.16      | 16.90      | 17.16     | 16.35     | 16.77      | 17.75     | 16.62     | 17.00     | 17.68      | 17.09       |       |
| G content               | 17.25      | 16.86     | 16.71     | 16.83     | 17.06      | 16.83      | 17.27     | 16.41     | 16.85      | 17.39     | 16.61     | 16.81     | 17.60      | 17.05       |       |
| T content               | 30.81      | 31.28     | 31.75     | 31.77     | 31.02      | 31.24      | 32.39     | 30.52     | 31.48      | 30.00     | 31.71     | 31.35     | 30.56      | 31.15       |       |
| N content               | 3.90       | 3.37      | 3.20      | 3.09      | 3.69       | 3.90       | 1.23      | 6.76      | 3.34       | 4.73      | 3.47      | 3.30      | 3.42       | 3.59        |       |

**Supplementary Table 11. GenBank accession numbers for BAC sequences from potato genotype RH (RH89-039-16).**

| Accession | Name     | Base pairs | Sequence fragments | Chromosome |
|-----------|----------|------------|--------------------|------------|
| AC239955  | RH001C14 | 107357     | 9                  | 6          |
| AC238959  | RH001D10 | 90328      | 3                  | 3          |
| AC233343  | RH001E23 | 127212     | 7                  | 5          |
| AC237902  | RH001F12 | 99557      | 8                  | 6          |
| AC239956  | RH001G02 | 95331      | 8                  | 5          |
| AC237903  | RH001H07 | 93791      | 7                  | 5          |
| AC240287  | RH001H20 | 123428     | 2                  | 7          |
| AC243013  | RH001H21 | 134210     | 2                  | 11         |
| AC231993  | RH001K16 | 121667     | 12                 | 1          |
| AC237904  | RH001O10 | 111436     | 9                  | 5          |
| AC237905  | RH002E09 | 110689     | 3                  | 9          |
| AC235607  | RH002F20 | 136570     | 8                  | 9          |
| AC239957  | RH002G12 | 110462     | 10                 | 7          |
| AC237824  | RH002G20 | 103598     | 11                 | 0          |
| AC239958  | RH002J19 | 113338     | 5                  | 0          |
| AC231994  | RH002L01 | 116918     | 6                  | 5          |
| AC231995  | RH002P11 | 178622     | 22                 | 1          |
| AC237906  | RH003B10 | 123432     | 3                  | 11         |
| AC237907  | RH003D20 | 155461     | 1                  | 1          |
| AC239286  | RH003G17 | 51750      | 3                  | 9          |
| AC237908  | RH003H09 | 118677     | 17                 | 5          |
| AC233344  | RH003K20 | 120034     | 9                  | 1          |
| AC237909  | RH004C10 | 93274      | 15                 | 5          |
| AC243014  | RH004D16 |            |                    |            |
| AC215216  | RH004E03 | 132944     | 9                  | 6          |
| AC233345  | RH004H06 | 118815     | 3                  | 5          |
| AC237910  | RH004H24 | 96288      | 9                  | 5          |
| AC237911  | RH004I22 | 105641     | 12                 | 6          |
| AC237912  | RH004I24 | 133586     | 3                  | 5          |
| AC211296  | RH004J06 | 134505     | 20                 | 4          |
| AC233346  | RH004M02 | 116168     | 2                  | 5          |
| AC237913  | RH004P07 | 178639     | 32                 | 5          |
| AC237914  | RH005A19 | 114736     | 6                  | 12         |
| JF317597  | RH005A22 | 99250      | 51                 | 12         |
| AC237915  | RH005E12 | 107184     | 12                 | 5          |
| AC237916  | RH005E20 | 141622     | 15                 | 1          |
| AC237597  | RH005F20 | 131891     | 13                 | 3          |
| AC235608  | RH005G04 | 120514     | 9                  | 9          |

|          |          |        |    |    |
|----------|----------|--------|----|----|
| AC237917 | RH005G22 | 126439 | 15 | 5  |
| AC237918 | RH005I02 | 109211 | 8  | 5  |
| AC225326 | RH005J09 | 34186  | 1  | 6  |
| AC237919 | RH005L02 | 108246 | 11 | 5  |
| AC237825 | RH005N07 | 139171 | 2  | 0  |
| AC239959 | RH005P10 | 135109 | 19 | 0  |
| AC233347 | RH006A03 | 99644  | 6  | 5  |
| AC237920 | RH006D03 | 108890 | 3  | 5  |
| AC233348 | RH006D17 | 114596 | 9  | 1  |
| JF317598 | RH006G03 | 110609 | 4  | 12 |
| AC216947 | RH006L15 | 109684 | 12 | 6  |
| AC237921 | RH006M08 | 109537 | 14 | 5  |
| AC237922 | RH007C01 | 154277 | 32 | 1  |
| AC240288 | RH007D20 | 130424 | 10 | 7  |
| AC233602 | RH007E14 | 105341 | 8  | 4  |
| AC237923 | RH007L17 | 159185 | 11 | 5  |
| AC239960 | RH007L22 | 185706 | 31 | 4  |
| AC237924 | RH007N06 | 106766 | 13 | 5  |
| AC217826 | RH008A10 | 125608 | 9  | 6  |
| AC233349 | RH008K06 | 100620 | 14 | 5  |
| AC237925 | RH008O03 | 126125 | 12 | 5  |
| AC237926 | RH008O14 | 32870  | 2  | 5  |
| AC237927 | RH008P12 | 125692 | 3  | 11 |
| AC233350 | RH009A20 | 79426  | 9  | 5  |
| AC237928 | RH009B21 | 99155  | 10 | 5  |
| AC239287 | RH009D23 | 168763 | 32 | 9  |
| AC239962 | RH009I12 | 101077 | 14 | 0  |
| AC235609 | RH009K01 | 110307 | 19 | 9  |
| AC237929 | RH009N08 | 109728 | 8  | 5  |
| AC233351 | RH009O06 | 114995 | 10 | 1  |
| AC239963 | RH009O14 | 117751 | 11 | 5  |
| AC235610 | RH010D12 | 124726 | 12 | 9  |
| AC239288 | RH010G14 | 234743 | 44 | 9  |
| AC239964 | RH010H08 | 143491 | 10 | 0  |
| AC235611 | RH010H21 | 7452   | 5  | 9  |
| AC237930 | RH010L20 | 120122 | 5  | 6  |
| AC233694 | RH010N18 | 111661 | 17 | 6  |
| AC233352 | RH010P11 | 126730 | 7  | 5  |
| AC239965 | RH010P17 | 113999 | 4  | 11 |
| AC237931 | RH011A10 | 138094 | 3  | 5  |
| AC239966 | RH011D17 | 123062 | 6  | 8  |
| AC233353 | RH011D18 | 119301 | 1  | 5  |
| AC237932 | RH011G06 | 98360  | 42 | 1  |

|          |          |        |    |    |
|----------|----------|--------|----|----|
| AC237933 | RH011K05 | 120917 | 15 | 10 |
| AC243016 | RH011L06 |        |    |    |
| AC237934 | RH011L11 | 72872  | 15 | 5  |
| AC233603 | RH011M18 | 135242 | 8  | 4  |
| AC237935 | RH012A13 | 117652 | 11 | 5  |
| AC237936 | RH012C23 | 114052 | 12 | 5  |
| AC233962 | RH012K20 | 136112 | 14 | 6  |
| AC233354 | RH012O06 | 57581  | 14 | 5  |
| AC239944 | RH013D06 | 100685 | 5  | 10 |
| AC237937 | RH013E08 | 104506 | 12 | 5  |
| AC237938 | RH013E13 | 102872 | 14 | 5  |
| AC237939 | RH013I05 | 126757 | 14 | 1  |
| AC239967 | RH013I15 | 114130 | 11 | 0  |
| AC233604 | RH013K09 | 103551 | 9  | 4  |
| AC237940 | RH013M18 | 106501 | 7  | 5  |
| AC236736 | RH013P20 | 12469  | 1  | 4  |
| AC233781 | RH014B19 | 129189 | 3  | 6  |
| AC237941 | RH014D12 | 111505 | 30 | 5  |
| AC233356 | RH014G04 | 115525 | 8  | 1  |
| AC233357 | RH014L16 | 103753 | 10 | 5  |
| AC237942 | RH014P14 | 52250  | 2  | 1  |
| AC237943 | RH015A16 | 74175  | 67 | 1  |
| AC231996 | RH015A19 | 117551 | 11 | 1  |
| AC240118 | RH015B02 | 115728 | 8  | 5  |
| JF317591 | RH015C06 | 155503 | 10 | 12 |
| AC237826 | RH015F14 | 111839 | 3  | 0  |
| AC212552 | RH015I05 | 132441 | 5  | 4  |
| AC237944 | RH015L03 | 123019 | 8  | 6  |
| AC231997 | RH015O22 | 135684 | 21 | 1  |
| AC237945 | RH015P16 | 90736  | 16 | 5  |
| AC217695 | RH015P17 | 139397 | 3  | 1  |
| AC233605 | RH016A07 | 141262 | 12 | 4  |
| AC233358 | RH016F15 | 127926 | 7  | 1  |
| AC233963 | RH016F22 | 130092 | 15 | 6  |
| AC233359 | RH016H20 | 152864 | 7  | 1  |
| AC233606 | RH016K05 | 151141 | 17 | 4  |
| AC236737 | RH016N01 | 118753 | 6  | 4  |
| AC233360 | RH016N18 | 130122 | 8  | 5  |
| AC236738 | RH016P06 | 91894  | 9  | 4  |
| AC240289 | RH017A01 | 128165 | 5  | 7  |
| AC243017 | RH017H16 |        |    |    |
| AC239968 | RH017H21 | 108240 | 20 | 0  |
| AC237946 | RH017I02 | 136775 | 7  | 5  |

|          |          |        |    |    |
|----------|----------|--------|----|----|
| AC231998 | RH017J12 | 176590 | 5  | 1  |
| AC235612 | RH017K05 | 123925 | 4  | 9  |
| AC231999 | RH017K15 | 115640 | 7  | 5  |
| AC237947 | RH017L14 | 121546 | 7  | 5  |
| AC243375 | RH017N06 | 121609 | 13 | 8  |
| AC237828 | RH017N13 | 39848  | 10 | 0  |
| AC237829 | RH017O12 | 47743  | 1  | 0  |
| AC233361 | RH017O15 | 119592 | 9  | 1  |
| AC237948 | RH017O19 | 90614  | 12 | 5  |
| AC239289 | RH017O22 | 131821 | 5  | 9  |
| AC237949 | RH018C21 | 68890  | 36 | 5  |
| AC239290 | RH018D06 | 130039 | 7  | 9  |
| AC243018 | RH018F07 | 20410  | 1  | 11 |
| AC233362 | RH018F20 | 85826  | 13 | 5  |
| AC237950 | RH018H06 | 100528 | 8  | 5  |
| AC233363 | RH018N24 | 123523 | 5  | 5  |
| AC233607 | RH018P06 | 123435 | 7  | 4  |
| AC237951 | RH019A19 | 143738 | 11 | 5  |
| AC234529 | RH019C05 | 118434 | 8  | 11 |
| AC233364 | RH019C24 | 93356  | 12 | 5  |
| AC232000 | RH019G04 | 113079 | 3  | 1  |
| AC239969 | RH019I02 | 119538 | 12 | 10 |
| AC237952 | RH019I09 | 110167 | 9  | 5  |
| AC237953 | RH020A06 | 136428 | 11 | 6  |
| AC237830 | RH020C15 | 114316 | 2  | 0  |
| AC233608 | RH020C16 | 148323 | 9  | 4  |
| AC235960 | RH020E11 | 111095 | 4  | 6  |
| AC232001 | RH020K24 | 108851 | 2  | 1  |
| AC237954 | RH020L03 | 109489 | 10 | 5  |
| AC237955 | RH021H16 | 127786 | 10 | 5  |
| AC238972 | RH021H18 | 118123 | 1  | 0  |
| AC237956 | RH021I08 | 135789 | 8  | 5  |
| AC239291 | RH021N11 | 10788  | 8  | 9  |
| AC231665 | RH021O18 | 108960 | 1  | 11 |
| JF317592 | RH021P16 | 103628 | 43 | 12 |
| AC235613 | RH022A03 | 117987 | 2  | 9  |
| AC217498 | RH022H02 | 128009 | 8  | 6  |
| AC237958 | RH022H03 | 129687 | 3  | 11 |
| AC232003 | RH022H17 | 120462 | 3  | 5  |
| AC237959 | RH022L24 | 131369 | 9  | 5  |
| AC232004 | RH022O03 | 117412 | 2  | 1  |
| AC233609 | RH023B09 | 141570 | 12 | 4  |
| AC235614 | RH023B10 | 129220 | 13 | 9  |

|          |          |        |    |         |
|----------|----------|--------|----|---------|
| AC239292 | RH023B19 | 133858 | 1  | 9       |
| JF317593 | RH023F23 | 109799 | 5  | 12      |
| AC226882 | RH023J02 | 124441 | 12 | 6       |
| AC239970 | RH023J16 | 120720 | 10 | 2       |
| AC239971 | RH023L12 | 104466 | 9  | 8       |
| AC235615 | RH023N22 | 169255 | 43 | 9       |
| AC237961 | RH023N23 | 104592 | 16 | 5       |
| AC239972 | RH024A19 | 121852 | 16 | 9       |
| AC232005 | RH024E24 | 120627 | 4  | 1       |
| JF317599 | RH024G09 | 113325 | 2  | 12      |
| AC239945 | RH024H06 | 146563 | 13 | 9       |
| AC232006 | RH024I03 | 115259 | 3  | 5       |
| AC237963 | RH024J06 | 146735 | 10 | 5       |
| AC239293 | RH024J13 | 126469 | 9  | 9       |
| AC232007 | RH024N07 | 146137 | 4  | 5       |
| AC237964 | RH024N14 | 72785  | 9  | 5       |
| AC239294 | RH024O14 | 111068 | 3  | 9       |
| AC233365 | RH024P10 | 109875 | 3  | 5       |
| AC237965 | RH025C18 | 131917 | 20 | 5       |
| AC237966 | RH025E12 | 99455  | 7  | 11      |
| AC214286 | RH025H23 | 137529 | 12 | unknown |
| AC217696 | RH025J19 | 111996 | 7  | 1       |
| AC237967 | RH025K17 | 64120  | 1  | 1       |
| AC237831 | RH025K21 | 113780 | 3  | 0       |
| AC237832 | RH025O01 | 111995 | 5  | 0       |
| AC237968 | RH026A02 | 118850 | 14 | 5       |
| AC234637 | RH026E05 | 123897 | 7  | 6       |
| AC233610 | RH026E19 | 139277 | 9  | 4       |
| AC235616 | RH026K06 | 133006 | 5  | 9       |
| AC235617 | RH026O04 | 155222 | 11 | 9       |
| AC233611 | RH026P02 | 118365 | 6  | 4       |
| AC236739 | RH026P14 | 156528 | 7  | 4       |
| AC237969 | RH026P20 | 77424  | 10 | 5       |
| AC238960 | RH027B19 | 135810 | 8  | 3       |
| AC233366 | RH027F15 | 86498  | 14 | 5       |
| AC233367 | RH027O19 | 77712  | 9  | 5       |
| AC233838 | RH028A14 | 129959 | 10 | 6       |
| AC237970 | RH028E12 | 81761  | 18 | 11      |
| AC237971 | RH028E15 | 72829  | 12 | 5       |
| AC238961 | RH028E21 | 144441 | 6  | 3       |
| AC243376 | RH028H04 | 126326 | 22 | 5       |
| AC217697 | RH028I04 | 147695 | 10 | 1       |
| AC237972 | RH028L14 | 108008 | 6  | 5       |

|          |          |        |    |    |
|----------|----------|--------|----|----|
| AC237973 | RH028M02 | 86504  | 18 | 11 |
| AC235618 | RH028N12 | 120542 | 7  | 9  |
| AC237974 | RH029C17 | 121974 | 4  | 5  |
| AC237975 | RH029F07 | 123919 | 12 | 5  |
| AC237976 | RH029G12 | 128105 | 24 | 5  |
| AC232008 | RH029J20 | 114856 | 3  | 1  |
| AC232009 | RH029M09 | 119752 | 6  | 1  |
| AC233368 | RH030B14 | 76660  | 12 | 5  |
| AC233369 | RH030D05 | 129244 | 21 | 5  |
| AC234295 | RH030E18 | 144897 | 4  | 6  |
| AC237977 | RH030F03 | 79791  | 11 | 5  |
| AC237978 | RH030H08 | 154958 | 7  | 5  |
| AC239973 | RH030J05 | 128215 | 22 | 0  |
| AC235619 | RH030O02 | 115759 | 11 | 9  |
| AC237979 | RH031C13 | 106101 | 8  | 5  |
| AC232010 | RH031D14 | 121177 | 6  | 5  |
| AC237980 | RH031D17 | 112745 | 13 | 8  |
| AC237981 | RH031D23 | 130367 | 15 | 5  |
| AC237982 | RH031J23 | 124913 | 12 | 5  |
| AC237983 | RH031N12 | 112498 | 8  | 6  |
| AC233370 | RH031N23 | 101906 | 4  | 1  |
| AC233782 | RH031P08 | 36610  | 1  | 6  |
| AC240290 | RH032K01 | 108037 | 1  | 7  |
| AC235692 | RH032L22 | 120650 | 6  | 6  |
| AC233371 | RH032N01 | 133397 | 8  | 1  |
| AC237984 | RH033A21 | 115621 | 6  | 5  |
| AC233372 | RH033B01 | 137427 | 14 | 1  |
| AC232011 | RH033B06 | 107787 | 3  | 1  |
| AC215653 | RH033B16 | 118202 | 3  | 6  |
| AC233612 | RH033F05 | 133292 | 17 | 4  |
| AC237985 | RH033H03 | 131018 | 11 | 5  |
| AC237986 | RH033J14 | 68884  | 27 | 5  |
| AC237833 | RH033P04 | 170968 | 4  | 0  |
| AC233373 | RH033P07 | 72128  | 13 | 5  |
| AC233374 | RH033P21 | 94130  | 12 | 5  |
| AC233375 | RH034F09 | 130733 | 6  | 5  |
| AC237987 | RH034G24 | 127397 | 10 | 5  |
| AC232691 | RH034J04 | 126486 | 2  | 6  |
| AC239974 | RH034J11 | 103555 | 14 | 5  |
| AC237988 | RH034K06 | 145675 | 15 | 5  |
| AC233376 | RH034K07 | 117364 | 7  | 5  |
| AC237989 | RH034K23 | 139030 | 6  | 1  |
| AC239975 | RH034M10 | 126784 | 11 | 0  |

|          |          |        |    |    |
|----------|----------|--------|----|----|
| AC237990 | RH034M24 | 51455  | 26 | 5  |
| AC237991 | RH034N23 | 116715 | 10 | 5  |
| AC237992 | RH034O22 | 133098 | 8  | 5  |
| AC209514 | RH034P18 | 139450 | 8  | 6  |
| AC235620 | RH035D01 | 33071  | 7  | 9  |
| AC237993 | RH035H22 | 124019 | 5  | 5  |
| AC237994 | RH035J20 | 116166 | 8  | 5  |
| AC239296 | RH035K02 | 122487 | 12 | 9  |
| AC233377 | RH035N16 | 74687  | 13 | 1  |
| AC239976 | RH036B12 | 107654 | 10 | 0  |
| AC237995 | RH036C17 | 104925 | 7  | 5  |
| AC240291 | RH036C20 | 161060 | 16 | 7  |
| AC237996 | RH036D06 | 117877 | 10 | 12 |
| AC243019 | RH036I14 | 22275  | 1  | 11 |
| AC237997 | RH036J12 | 117305 | 4  | 5  |
| AC232012 | RH036O23 | 110194 | 4  | 1  |
| AC237998 | RH037B15 | 67892  | 10 | 1  |
| AC237999 | RH037D18 | 59172  | 2  | 5  |
| AC238000 | RH037E01 | 125839 | 8  | 5  |
| AC238001 | RH037G24 | 110021 | 7  | 5  |
| AC238002 | RH037I15 | 127160 | 10 | 5  |
| AC240292 | RH037I19 | 183490 | 7  | 7  |
| AC238003 | RH037L20 | 87949  | 7  | 5  |
| AC240293 | RH037O18 | 57786  | 1  | 7  |
| AC238004 | RH038B01 | 111041 | 26 | 1  |
| AC238005 | RH038B14 | 106596 | 8  | 5  |
| AC231870 | RH038C08 | 144516 | 18 | 6  |
| AC232013 | RH038H21 | 135590 | 6  | 5  |
| AC238962 | RH038O04 | 135011 | 6  | 3  |
| AC239297 | RH039A20 | 127628 | 20 | 9  |
| AC238007 | RH039C05 | 155001 | 17 | 5  |
| AC235621 | RH039K02 | 169660 | 22 | 9  |
| AC238008 | RH039K08 | 68994  | 21 | 5  |
| AC238009 | RH039K20 | 157475 | 21 | 10 |
| AC238010 | RH039N19 | 161099 | 17 | 5  |
| AC236842 | RH040A20 | 90015  | 8  | 6  |
| AC234530 | RH040C01 | 160911 | 11 | 1  |
| AC233378 | RH040D07 | 157100 | 8  | 5  |
| AC238011 | RH040H22 | 113654 | 7  | 0  |
| AC233379 | RH041A22 | 172031 | 6  | 5  |
| AC238012 | RH041C20 | 126817 | 7  | 5  |
| AC235622 | RH041F06 | 181237 | 43 | 9  |
| AC239978 | RH041F19 | 88364  | 14 | 9  |



|          |          |        |    |    |
|----------|----------|--------|----|----|
| AC233380 | RH041G07 | 63217  | 10 | 1  |
| AC231420 | RH041I24 | 120299 | 10 | 6  |
| AC211135 | RH041K10 | 114699 | 26 | 4  |
| AC233381 | RH041L04 | 169504 | 11 | 5  |
| AC234689 | RH041O10 | 180830 | 19 | 6  |
| AC238013 | RH041P10 | 59886  | 13 | 5  |
| AC243021 | RH042C12 |        |    |    |
| AC238014 | RH042D14 | 171592 | 9  | 5  |
| AC238015 | RH042I10 | 157704 | 9  | 5  |
| AC233382 | RH042N03 | 149061 | 17 | 5  |
| AC237835 | RH042N17 | 153270 | 14 | 0  |
| AC239298 | RH043C21 | 142321 | 8  | 9  |
| AC233383 | RH043C23 | 67532  | 8  | 1  |
| AC234531 | RH043E24 | 120574 | 18 | 5  |
| AC238016 | RH043F10 | 139425 | 10 | 5  |
| JF317600 | RH043F12 | 223918 | 16 | 12 |
| AC237836 | RH043F14 | 112415 | 8  | 0  |
| AC237837 | RH043J22 | 136956 | 8  | 0  |
| AC209515 | RH043K03 | 113014 | 15 | 8  |
| AC238017 | RH043L21 | 121157 | 15 | 5  |
| AC238018 | RH043P04 | 156753 | 17 | 5  |
| AC233384 | RH043P07 | 135186 | 4  | 5  |
| AC238019 | RH044A03 | 64148  | 18 | 5  |
| AC232014 | RH044A21 | 143487 | 8  | 5  |
| AC217098 | RH044B03 | 130609 | 12 | 6  |
| AC239299 | RH044E09 | 121044 | 4  | 9  |
| AC238020 | RH044F20 | 89946  | 12 | 6  |
| AC233385 | RH044F21 | 108549 | 8  | 1  |
| AC238021 | RH044G10 | 101863 | 6  | 4  |
| AC238022 | RH044H02 | 128200 | 9  | 11 |
| AC233386 | RH044J18 | 140939 | 7  | 5  |
| AC238023 | RH044N04 | 118637 | 8  | 5  |
| AC233387 | RH045A03 | 106051 | 11 | 1  |
| JF317601 | RH045A20 | 161402 | 46 | 12 |
| AC240294 | RH045D12 | 175763 | 1  | 7  |
| AC232015 | RH045E17 | 158962 | 18 | 1  |
| AC238024 | RH045I08 | 152401 | 35 | 1  |
| AC240295 | RH045I15 | 110102 | 6  | 7  |
| AC234532 | RH045J07 | 129287 | 12 | 1  |
| AC233388 | RH045L02 | 133343 | 1  | 5  |
| AC239979 | RH045N13 | 110563 | 5  | 5  |
| AC236740 | RH045P23 | 147446 | 11 | 4  |
| AC233389 | RH046D06 | 144380 | 9  | 5  |

|          |          |        |    |         |
|----------|----------|--------|----|---------|
| AC233390 | RH046I02 | 82614  | 14 | 5       |
| AC233391 | RH046N09 | 143790 | 5  | 1       |
| AC233392 | RH046O24 | 111583 | 7  | 1       |
| JF317602 | RH047A09 | 129048 | 2  | 12      |
| AC240296 | RH047B12 | 129732 | 1  | 7       |
| AC239300 | RH047D01 | 175546 | 5  | 9       |
| AC209521 | RH047D21 | 137764 | 17 | 1       |
| AC232016 | RH047F09 | 152899 | 16 | 1       |
| AC239301 | RH047G06 | 154406 | 20 | 9       |
| AC232017 | RH047H09 | 104858 | 3  | 5       |
| AC213585 | RH047K03 | 117020 | 12 | unknown |
| AC232018 | RH047L13 | 157354 | 7  | 1       |
| AC239980 | RH047N06 | 133594 | 9  | 9       |
| JF317603 | RH048C02 | 146271 | 2  | 12      |
| AC235623 | RH048C24 | 131723 | 12 | 9       |
| AC238025 | RH048D11 | 110776 | 12 | 5       |
| AC238026 | RH048E18 | 107968 | 23 | 5       |
| AC232692 | RH048G09 | 84451  | 10 | 6       |
| JF317604 | RH048H18 | 145108 | 29 | 12      |
| AC238027 | RH048I15 | 52999  | 13 | 5       |
| AC232019 | RH048J07 | 123175 | 2  | 5       |
| AC240297 | RH048K01 | 115650 | 1  | 7       |
| AC233393 | RH048M11 | 146670 | 2  | 1       |
| AC232020 | RH049A14 | 144511 | 12 | 5       |
| AC238028 | RH049A20 | 30078  | 7  | 5       |
| AC239174 | RH049B08 | 37003  | 2  | 3       |
| AC233613 | RH049C05 | 154988 | 6  | 4       |
| AC238029 | RH049F18 | 162005 | 14 | 5       |
| AC232021 | RH049G02 | 155022 | 7  | 1       |
| AC243377 | RH049G14 | 110793 | 17 | 5       |
| AC238030 | RH049I19 | 102969 | 4  | 5       |
| AC239981 | RH049J10 | 96287  | 9  | 10      |
| AC232022 | RH049K20 | 133790 | 7  | 5       |
| AC235624 | RH050A04 | 147027 | 7  | 9       |
| AC238031 | RH050F09 | 177280 | 9  | 5       |
| AC238032 | RH050F13 | 154689 | 13 | 1       |
| AC238033 | RH050F22 | 118131 | 20 | 5       |
| AC238034 | RH050H06 | 137062 | 12 | 5       |
| AC232023 | RH050I08 | 113681 | 5  | 5       |
| AC239302 | RH050J01 | 158247 | 13 | 9       |
| AC232707 | RH050K21 | 144197 | 16 | 6       |
| AC238035 | RH050L05 | 110159 | 4  | 5       |
| AC238036 | RH050N09 | 120339 | 2  | 0       |

|          |          |        |    |         |
|----------|----------|--------|----|---------|
| AC217698 | RH050N11 | 135447 | 10 | 1       |
| AC232024 | RH050O06 | 157618 | 9  | 1       |
| AC217827 | RH050P13 | 125652 | 5  | unknown |
| AC215599 | RH051A16 | 162082 | 14 | 6       |
| AC209516 | RH051B02 | 115917 | 15 | 6       |
| AC243378 | RH051B03 | 149040 | 11 | 5       |
| AC238037 | RH051C09 | 24178  | 3  | 5       |
| AC232025 | RH051C18 | 133592 | 5  | 5       |
| AC238038 | RH051E20 | 121937 | 8  | 5       |
| AC233394 | RH051F22 | 137199 | 1  | 1       |
| AC217699 | RH051I12 | 186619 | 17 | 1       |
| AC239982 | RH051N09 | 132508 | 7  | 5       |
| AC238039 | RH051N20 | 119610 | 12 | 5       |
| AC217700 | RH051P18 | 161933 | 13 | 1       |
| JF317605 | RH052B02 | 140280 | 2  | 12      |
| AC238040 | RH052B07 | 144908 | 10 | 0       |
| AC238041 | RH052B16 | 161999 | 11 | 5       |
| AC231666 | RH052D21 | 147784 | 1  | 11      |
| AC233395 | RH052G17 | 110759 | 4  | 5       |
| JF317594 | RH052H02 | 132879 | 37 | 6       |
| AC238042 | RH052H06 | 128025 | 18 | 5       |
| AC238043 | RH052H07 | 152102 | 11 | 5       |
| AC232026 | RH052K15 | 141790 | 7  | 1       |
| AC236709 | RH052L18 | 141662 | 16 | 3       |
| AC233396 | RH052M07 | 158828 | 7  | 5       |
| AC232027 | RH052M23 | 131346 | 15 | 1       |
| AC238044 | RH053A23 | 101589 | 15 | 1       |
| AC238045 | RH053C07 | 173629 | 13 | 5       |
| AC232028 | RH053G11 | 172101 | 11 | 1       |
| AC232029 | RH053G20 | 121809 | 36 | 1       |
| AC238046 | RH053H10 | 137914 | 10 | 5       |
| AC240119 | RH053I02 | 158796 | 25 | 1       |
| AC233397 | RH053I21 | 14260  | 1  | 5       |
| AC236741 | RH053L01 | 174177 | 12 | 4       |
| AC239983 | RH053N17 | 137479 | 8  | 9       |
| AC217701 | RH053N19 | 132657 | 6  | 1       |
| AC238047 | RH054A08 | 120437 | 9  | 5       |
| AC239984 | RH054B09 | 122015 | 7  | 5       |
| AC238048 | RH054B22 | 85202  | 31 | 11      |
| AC233398 | RH054C19 | 116406 | 12 | 1       |
| AC233399 | RH054D06 | 34726  | 4  | 5       |
| AC238049 | RH054F24 | 179053 | 13 | 5       |
| AC235625 | RH054G02 | 120672 | 22 | 9       |

|          |          |        |    |    |
|----------|----------|--------|----|----|
| AC238050 | RH054G08 | 138693 | 12 | 5  |
| AC238051 | RH054G21 | 49694  | 2  | 5  |
| AC238052 | RH054G22 | 144450 | 9  | 5  |
| AC237056 | RH054J22 | 168622 | 15 | 3  |
| AC239985 | RH054L18 | 154886 | 16 | 5  |
| AC233400 | RH054O11 | 128781 | 13 | 5  |
| AC238053 | RH055E24 | 119828 | 6  | 5  |
| JF317606 | RH055F02 | 139523 | 27 | 12 |
| AC238054 | RH055F05 | 119394 | 8  | 5  |
| AC238055 | RH055F06 | 173586 | 16 | 5  |
| AC243024 | RH055G15 | 58565  | 1  | 11 |
| AC233614 | RH055I22 | 30049  | 1  | 4  |
| AC236742 | RH055J05 | 165923 | 6  | 4  |
| AC238056 | RH055L08 | 141947 | 14 | 5  |
| JF317607 | RH055L16 | 128104 | 7  | 12 |
| AC233401 | RH055M13 | 8970   | 2  | 1  |
| AC236710 | RH055M19 | 176168 | 14 | 3  |
| AC217702 | RH055N11 | 160222 | 12 | 1  |
| AC237840 | RH055N16 | 86262  | 3  | 0  |
| AC238057 | RH055N24 | 129655 | 5  | 5  |
| AC238058 | RH055O14 | 130342 | 6  | 5  |
| AC217099 | RH055P12 | 149067 | 8  | 6  |
| AC232030 | RH055P15 | 163218 | 14 | 1  |
| AC237841 | RH056A20 | 32123  | 1  | 0  |
| AC232031 | RH056C07 | 121861 | 7  | 1  |
| AC240120 | RH056C12 | 124285 | 34 | 5  |
| AC234704 | RH056D02 | 148999 | 7  | 6  |
| AC243025 | RH056E01 |        |    |    |
| AC217703 | RH056E15 | 116094 | 5  | 1  |
| AC232032 | RH056E23 | 111567 | 7  | 1  |
| AC232033 | RH056F12 | 168988 | 14 | 5  |
| AC238059 | RH056G03 | 130714 | 11 | 5  |
| AC232034 | RH056G12 | 113388 | 8  | 5  |
| AC232035 | RH056J01 | 135368 | 10 | 5  |
| AC239986 | RH056J10 | 159886 | 7  | 1  |
| AC238060 | RH056K01 | 171135 | 19 | 5  |
| AC238061 | RH056K04 | 136948 | 10 | 5  |
| AC233402 | RH056K06 | 152719 | 12 | 5  |
| AC235626 | RH056K24 | 147869 | 20 | 9  |
| AC232637 | RH056L13 | 122427 | 16 | 6  |
| AC239303 | RH056M12 | 157578 | 27 | 9  |
| AC239304 | RH056M16 | 169790 | 29 | 9  |
| AC233403 | RH056O13 | 76230  | 5  | 5  |

|          |          |        |    |    |
|----------|----------|--------|----|----|
| AC238062 | RH056P12 | 129428 | 10 | 5  |
| AC238063 | RH057B24 | 103596 | 9  | 11 |
| AC232036 | RH057E11 | 125398 | 4  | 1  |
| AC232037 | RH057E14 | 130007 | 4  | 12 |
| AC238064 | RH057E24 | 133927 | 26 | 5  |
| AC233404 | RH057F08 | 86869  | 10 | 1  |
| AC243379 | RH057F24 | 181004 | 13 | 5  |
| AC217704 | RH057G03 | 135761 | 11 | 1  |
| AC209517 | RH057H05 | 143696 | 20 | 6  |
| AC232038 | RH057L12 | 144983 | 8  | 1  |
| AC238065 | RH057M22 | 118893 | 10 | 6  |
| AC238066 | RH057O06 | 100039 | 6  | 5  |
| AC238067 | RH057O12 | 52660  | 11 | 5  |
| AC232039 | RH058A02 | 177713 | 7  | 1  |
| AC236711 | RH058C12 | 49170  | 17 | 3  |
| AC238068 | RH058D12 | 159760 | 10 | 5  |
| AC237842 | RH058D13 | 104575 | 5  | 0  |
| AC231630 | RH058F12 | 140909 | 23 | 6  |
| AC231667 | RH058F17 | 160949 | 2  | 11 |
| AC235627 | RH058G03 | 143726 | 9  | 9  |
| AC233405 | RH058H11 | 102618 | 15 | 5  |
| AC238069 | RH058H20 | 157282 | 9  | 5  |
| AC233406 | RH059A22 | 156949 | 15 | 1  |
| AC243026 | RH059C07 | 37427  | 1  | 11 |
| AC238070 | RH059C16 | 141376 | 10 | 5  |
| AC238071 | RH059F14 | 105366 | 2  | 5  |
| AC233407 | RH059J04 | 165359 | 12 | 1  |
| AC239987 | RH059J13 | 128511 | 10 | 10 |
| AC233408 | RH059K09 | 136794 | 9  | 1  |
| AC217705 | RH059L04 | 115092 | 3  | 1  |
| AC238072 | RH059N06 | 132617 | 8  | 5  |
| AC231631 | RH059P14 | 153767 | 17 | 6  |
| AC239305 | RH060A02 | 187679 | 20 | 9  |
| AC233409 | RH060B17 | 169016 | 8  | 5  |
| AC233410 | RH060D05 | 131037 | 8  | 5  |
| AC243380 | RH060F21 | 109852 | 7  | 5  |
| AC206931 | RH060H14 | 163599 | 7  | 6  |
| AC233615 | RH060H22 | 138129 | 13 | 4  |
| AC206932 | RH060M13 | 164932 | 7  | 6  |
| AC238073 | RH060N18 | 43584  | 10 | 5  |
| AC232040 | RH060N23 | 132026 | 22 | 1  |
| AC209518 | RH060O21 | 134307 | 3  | 2  |
| AC239306 | RH061A13 | 164620 | 9  | 9  |

|          |          |        |    |         |
|----------|----------|--------|----|---------|
| AC235961 | RH061A18 | 140657 | 16 | 6       |
| AC219014 | RH061A19 | 102847 | 1  | 6       |
| AC237843 | RH061D10 | 45637  | 1  | 0       |
| AC233411 | RH061F09 | 106448 | 7  | 1       |
| AC238074 | RH061F13 | 204240 | 7  | 6       |
| AC237844 | RH061F19 | 131374 | 6  | 0       |
| AC233412 | RH061H02 | 136503 | 11 | 5       |
| AC239307 | RH061H16 | 115257 | 25 | 9       |
| AC233413 | RH061J07 | 144877 | 11 | 5       |
| AC217706 | RH061L18 | 151352 | 4  | 1       |
| AC238075 | RH061M07 | 116491 | 45 | 1       |
| AC238076 | RH062B10 | 105308 | 8  | 5       |
| AC233414 | RH062B13 | 126152 | 5  | 1       |
| AC237846 | RH062C02 | 124718 | 3  | 0       |
| AC238077 | RH062C12 | 156694 | 6  | 1       |
| AC238078 | RH062E08 | 140246 | 10 | 5       |
| AC217707 | RH062O06 | 112171 | 2  | 1       |
| AC215633 | RH062P09 | 146752 | 15 | unknown |
| AC239988 | RH063B11 | 117762 | 18 | 11      |
| AC239308 | RH063B15 | 261872 | 85 | 9       |
| JF317608 | RH063B21 | 148259 | 19 | 12      |
| AC238079 | RH063D08 | 124037 | 5  | 5       |
| AC240298 | RH063G21 | 176196 | 6  | 7       |
| AC233053 | RH063H21 | 119541 | 4  | 6       |
| AC240299 | RH063K23 | 159781 | 1  | 7       |
| AC217100 | RH063L11 | 128753 | 9  | 6       |
| AC233415 | RH064A22 | 152529 | 10 | 1       |
| AC238963 | RH064C05 | 169255 | 8  | 3       |
| AC234649 | RH064D14 | 138154 | 11 | 6       |
| AC238964 | RH064D17 | 160852 | 5  | 3       |
| AC238080 | RH064H11 | 174234 | 15 | 5       |
| AC238081 | RH064K24 | 135990 | 9  | 5       |
| AC217708 | RH065A16 | 112510 | 21 | 1       |
| AC238082 | RH065B15 | 134587 | 8  | 5       |
| AC238083 | RH065B22 | 155586 | 11 | 5       |
| AC233213 | RH065C06 | 123239 | 14 | 6       |
| AC239309 | RH065C11 | 120264 | 20 | 9       |
| AC232041 | RH065D17 | 148187 | 5  | 5       |
| AC232042 | RH065F17 | 113119 | 5  | 5       |
| AC235628 | RH065G16 | 156810 | 16 | 9       |
| AC233616 | RH065I03 | 136335 | 17 | 4       |
| AC233416 | RH065I21 | 122053 | 10 | 1       |
| AC238084 | RH065I22 | 127026 | 16 | 1       |

|          |          |        |    |    |
|----------|----------|--------|----|----|
| AC217709 | RH065L05 | 128744 | 12 | 1  |
| AC238085 | RH065N15 | 94906  | 17 | 5  |
| AC239310 | RH065O01 | 100520 | 38 | 9  |
| AC238086 | RH065O22 | 38168  | 10 | 5  |
| HQ896308 | RH066A20 | 159793 | 1  | 0  |
| AC232043 | RH066C24 | 156717 | 13 | 5  |
| AC243381 | RH066D21 | 84390  | 9  | 5  |
| AC235629 | RH066E20 | 292074 | 55 | 9  |
| AC217710 | RH066F01 | 161600 | 7  | 1  |
| AC238087 | RH066F21 | 44934  | 9  | 5  |
| AC233417 | RH066J10 | 173171 | 11 | 1  |
| AC235962 | RH066L07 | 118575 | 16 | 6  |
| AC238088 | RH066M07 | 39429  | 9  | 5  |
| AC217711 | RH066M19 | 144656 | 6  | 1  |
| AC240300 | RH066P11 | 159783 | 1  | 7  |
| AC232044 | RH066P20 | 126800 | 10 | 1  |
| AC238089 | RH067A10 | 112429 | 7  | 5  |
| AC238090 | RH067C21 | 91447  | 7  | 5  |
| JF317609 | RH067F12 | 106928 | 8  | 12 |
| AC233418 | RH067F18 | 150429 | 13 | 1  |
| AC232045 | RH067H11 | 176143 | 15 | 1  |
| AC238091 | RH067H17 | 156097 | 15 | 5  |
| AC240301 | RH067I06 | 176821 | 6  | 7  |
| AC212553 | RH067J23 | 135218 | 9  | 8  |
| AC231668 | RH067L08 | 150112 | 1  | 11 |
| JF317610 | RH067L11 | 126332 | 14 | 10 |
| AC232708 | RH067N14 | 142915 | 10 | 6  |
| AC238092 | RH068A22 | 130437 | 21 | 1  |
| AC239989 | RH068C04 | 186375 | 19 | 9  |
| AC238093 | RH068E06 | 117917 | 7  | 5  |
| AC215773 | RH068I10 | 160546 | 14 | 6  |
| AC204499 | RH069B12 | 144084 | 4  | 6  |
| AC232046 | RH069C09 | 107293 | 14 | 1  |
| AC238094 | RH069C13 | 126075 | 11 | 5  |
| AC235963 | RH069E08 | 109938 | 11 | 6  |
| AC237847 | RH069F21 | 143214 | 8  | 11 |
| AC240302 | RH069K07 | 161144 | 17 | 7  |
| AC232047 | RH069M18 | 130754 | 7  | 1  |
| AC237848 | RH069O02 | 106202 | 2  | 0  |
| AC232048 | RH069O21 | 118031 | 12 | 5  |
| AC238095 | RH070B02 | 114426 | 16 | 5  |
| AC232049 | RH070E16 | 140525 | 9  | 1  |
| AC238096 | RH070F21 | 120109 | 12 | 5  |

|          |          |        |    |    |
|----------|----------|--------|----|----|
| AC239311 | RH070H13 | 304894 | 40 | 9  |
| AC239990 | RH070H22 | 142731 | 6  | 0  |
| AC239175 | RH070L17 | 135770 | 7  | 3  |
| AC238097 | RH070M06 | 154272 | 12 | 5  |
| AC238098 | RH070N18 | 129380 | 14 | 5  |
| AC232050 | RH070P15 | 155465 | 12 | 1  |
| AC238099 | RH071A13 | 128667 | 5  | 11 |
| AC238100 | RH071B04 | 125179 | 8  | 5  |
| AC233419 | RH071B08 | 141619 | 16 | 1  |
| AC238101 | RH071D16 | 125538 | 5  | 5  |
| AC238102 | RH071E22 | 149092 | 5  | 1  |
| AC239946 | RH071F06 | 124247 | 5  | 0  |
| AC240303 | RH071K15 | 130214 | 3  | 7  |
| AC235964 | RH071M01 | 156370 | 14 | 6  |
| AC238104 | RH071N14 | 146911 | 7  | 5  |
| AC233420 | RH071N17 | 127097 | 5  | 5  |
| AC233421 | RH071O06 | 131718 | 8  | 5  |
| AC239991 | RH071O09 | 71257  | 15 | 11 |
| AC233617 | RH072B05 | 133974 | 8  | 4  |
| AC235630 | RH072B14 | 176657 | 14 | 9  |
| AC239992 | RH072C08 | 105537 | 2  | 11 |
| AC232051 | RH072I02 | 140469 | 7  | 1  |
| AC232052 | RH072I03 | 134177 | 1  | 5  |
| AC237664 | RH072M03 | 105472 | 10 | 3  |
| AC240304 | RH072M11 | 176451 | 9  | 7  |
| AC233422 | RH072M12 | 137520 | 6  | 5  |
| AC233423 | RH073B23 | 144702 | 8  | 1  |
| AC236743 | RH073D06 | 188815 | 9  | 4  |
| AC236744 | RH073D11 | 142527 | 8  | 4  |
| AC238105 | RH073E21 | 132274 | 19 | 5  |
| AC217712 | RH073F20 | 135731 | 15 | 1  |
| AC239176 | RH073H08 | 158389 | 8  | 3  |
| AC217713 | RH073J01 | 129699 | 4  | 1  |
| AC238106 | RH073K18 | 115154 | 9  | 5  |
| AC209522 | RH073N03 | 122424 | 9  | 1  |
| AC239993 | RH074E19 | 90720  | 24 | 10 |
| AC237598 | RH074H23 | 111843 | 20 | 3  |
| AC212316 | RH074I20 | 42944  | 1  | 8  |
| AC238107 | RH074J03 | 157821 | 10 | 5  |
| AC239177 | RH074J11 | 154940 | 7  | 3  |
| AC232053 | RH074J16 | 126421 | 4  | 1  |
| AC232054 | RH074K13 | 130395 | 7  | 1  |
| AC239994 | RH074L08 | 64094  | 28 | 10 |



|          |          |        |    |    |
|----------|----------|--------|----|----|
| AC238108 | RH074N01 | 124152 | 16 | 6  |
| AC235631 | RH074P10 | 133686 | 13 | 9  |
| AC238109 | RH075A11 | 135172 | 13 | 5  |
| AC238110 | RH075D14 | 156144 | 14 | 5  |
| AC213586 | RH075F10 | 140754 | 4  | 6  |
| AC212966 | RH075F20 | 155334 | 11 | 2  |
| AC235632 | RH075J01 | 153544 | 10 | 9  |
| AC233424 | RH075J13 | 150162 | 12 | 1  |
| AC235965 | RH075K06 | 99823  | 16 | 6  |
| AC238111 | RH075K07 | 148667 | 9  | 5  |
| AC233425 | RH075K10 | 144683 | 10 | 5  |
| AC238112 | RH075L09 | 133066 | 3  | 5  |
| AC235966 | RH075L14 | 117161 | 17 | 6  |
| AC238965 | RH075L22 | 135352 | 5  | 3  |
| AC232055 | RH075N11 | 160074 | 3  | 5  |
| AC238113 | RH075N21 | 148537 | 8  | 5  |
| AC238114 | RH075P03 | 120620 | 9  | 5  |
| AC233426 | RH076B03 | 127037 | 4  | 1  |
| AC233618 | RH076B17 | 144807 | 8  | 4  |
| AC232056 | RH076C11 | 139134 | 10 | 5  |
| AC234256 | RH076E20 | 131052 | 9  | 6  |
| AC238115 | RH076F16 | 135887 | 16 | 5  |
| AC238116 | RH076G11 | 147197 | 16 | 5  |
| AC236745 | RH076J07 | 158469 | 13 | 4  |
| AC239995 | RH076K12 | 108090 | 20 | 1  |
| AC238117 | RH076L04 | 136642 | 8  | 5  |
| AC237849 | RH076L21 | 149118 | 9  | 0  |
| AC239996 | RH076N20 | 128241 | 28 | 7  |
| AC232057 | RH076O08 | 153722 | 17 | 5  |
| AC217714 | RH077D18 | 126620 | 11 | 1  |
| AC233619 | RH077F11 | 136418 | 11 | 4  |
| AC235693 | RH077L10 | 121390 | 7  | 6  |
| AC217715 | RH077L17 | 133196 | 13 | 1  |
| AC232058 | RH077L21 | 129296 | 6  | 1  |
| AC232059 | RH077L22 | 125563 | 5  | 1  |
| AC206933 | RH077N17 | 143072 | 10 | 6  |
| AC239947 | RH077O20 | 142919 | 20 | 2  |
| AC233427 | RH078B02 | 127577 | 8  | 1  |
| AC239997 | RH078B06 | 179495 | 21 | 10 |
| AC238118 | RH078D07 | 151268 | 10 | 5  |
| AC233620 | RH078E08 | 98134  | 8  | 4  |
| AC238119 | RH078E12 | 134971 | 12 | 5  |
| AC238120 | RH078E16 | 138597 | 11 | 5  |

|          |          |        |    |    |
|----------|----------|--------|----|----|
| AC238121 | RH078E17 | 96080  | 21 | 1  |
| AC238122 | RH078F10 | 155133 | 10 | 4  |
| AC233428 | RH078G12 | 131257 | 12 | 1  |
| AC233429 | RH078I14 | 139197 | 7  | 5  |
| AC238123 | RH078N21 | 69987  | 3  | 5  |
| AC236712 | RH078O14 | 139508 | 26 | 3  |
| AC239948 | RH079B06 | 110232 | 5  | 12 |
| AC233431 | RH079G09 | 153209 | 12 | 1  |
| JF317611 | RH079G17 | 140542 | 3  | 12 |
| AC239312 | RH079H12 | 242455 | 48 | 9  |
| AC232060 | RH079J09 | 150779 | 16 | 5  |
| AC217101 | RH079K17 | 135878 | 6  | 6  |
| AC240305 | RH079M14 | 159783 | 1  | 7  |
| AC239998 | RH079N09 | 123951 | 11 | 5  |
| AC243028 | RH079O03 |        |    |    |
| AC239313 | RH079O06 | 141579 | 7  | 9  |
| AC238124 | RH079O07 | 126721 | 5  | 4  |
| AC233432 | RH079P09 | 122692 | 9  | 5  |
| AC238125 | RH080A10 | 101238 | 4  | 6  |
| AC238126 | RH080B14 | 101906 | 14 | 5  |
| AC238127 | RH080D16 | 145621 | 13 | 1  |
| AC238966 | RH080F02 | 125258 | 8  | 3  |
| AC236843 | RH080H10 | 142026 | 12 | 12 |
| AC233433 | RH080J06 | 133797 | 3  | 1  |
| AC238128 | RH080J12 | 117656 | 10 | 11 |
| AC235633 | RH080L08 | 40610  | 4  | 9  |
| JF317612 | RH080L23 | 140833 | 15 | 12 |
| AC209523 | RH080N13 | 129751 | 3  | 5  |
| AC235634 | RH080N15 | 129057 | 6  | 9  |
| AC243029 | RH081B04 | 151409 | 3  | 11 |
| AC233434 | RH081B09 | 138706 | 5  | 5  |
| AC238129 | RH081D05 | 138615 | 25 | 5  |
| AC239314 | RH081D15 | 127280 | 4  | 9  |
| AC233435 | RH081E07 | 131839 | 7  | 5  |
| AC238130 | RH081H13 | 107874 | 10 | 5  |
| AC232061 | RH081H19 | 142466 | 5  | 5  |
| AC238131 | RH081I04 | 129886 | 28 | 5  |
| AC236844 | RH081J17 | 147234 | 13 | 6  |
| AC233436 | RH081M09 | 147600 | 13 | 5  |
| AC243382 | RH081M11 | 138527 | 14 | 5  |
| AC233621 | RH081P18 | 118051 | 10 | 4  |
| AC238132 | RH082D23 | 127057 | 8  | 4  |
| AC233437 | RH082F01 | 163285 | 11 | 5  |

|          |          |        |    |    |
|----------|----------|--------|----|----|
| AC212037 | RH082H07 | 134992 | 19 | 6  |
| AC235635 | RH082I16 | 171765 | 21 | 9  |
| AC233438 | RH082J06 | 145911 | 3  | 5  |
| AC233439 | RH082L21 | 133712 | 8  | 5  |
| AC238133 | RH082N11 | 118800 | 13 | 5  |
| AC238134 | RH082N16 | 24854  | 12 | 5  |
| AC233440 | RH082N18 | 116792 | 10 | 1  |
| AC238135 | RH082O11 | 137309 | 11 | 5  |
| AC238136 | RH083A24 | 138357 | 12 | 1  |
| AC238137 | RH083B01 | 118343 | 11 | 5  |
| AC206934 | RH083C08 | 144705 | 2  | 6  |
| AC233441 | RH083F10 | 138700 | 7  | 5  |
| AC231669 | RH083G18 | 158606 | 3  | 11 |
| AC237599 | RH083I08 | 139621 | 15 | 3  |
| AC217716 | RH083J12 | 130865 | 2  | 1  |
| AC236713 | RH083M17 | 159150 | 8  | 3  |
| AC238138 | RH083O09 | 146924 | 10 | 5  |
| AC217717 | RH083O20 | 141324 | 3  | 1  |
| AC239949 | RH084E06 | 146300 | 8  | 6  |
| AC232062 | RH084F08 | 141840 | 15 | 1  |
| AC238139 | RH084G22 | 118080 | 9  | 5  |
| AC238140 | RH084I18 | 128737 | 4  | 5  |
| AC232063 | RH084L18 | 147319 | 11 | 1  |
| AC238141 | RH084M03 | 138801 | 15 | 5  |
| AC237665 | RH084M18 | 122792 | 11 | 3  |
| AC237083 | RH084O21 | 136357 | 8  | 3  |
| AC238142 | RH084P19 | 138324 | 14 | 1  |
| AC239315 | RH085A13 | 139517 | 12 | 9  |
| AC238143 | RH085B09 | 130297 | 5  | 5  |
| AC234535 | RH085B11 | 127930 | 9  | 0  |
| AC233443 | RH085B17 | 138784 | 7  | 1  |
| AC238144 | RH085C18 | 115006 | 6  | 5  |
| AC239999 | RH085D23 | 123712 | 8  | 0  |
| AC238145 | RH085E22 | 153296 | 19 | 10 |
| AC232064 | RH085E23 | 141914 | 4  | 1  |
| AC238146 | RH085H23 | 139937 | 5  | 5  |
| AC232065 | RH085N12 | 128863 | 8  | 1  |
| AC233444 | RH085N13 | 145003 | 12 | 1  |
| AC237850 | RH085N22 | 98355  | 14 | 5  |
| AC239950 | RH086A07 | 122312 | 6  | 1  |
| AC238147 | RH086A13 | 138120 | 5  | 5  |
| AC238148 | RH086A15 | 106164 | 23 | 8  |
| AC233214 | RH086B11 | 142440 | 12 | 6  |

|          |          |        |    |    |
|----------|----------|--------|----|----|
| AC240306 | RH086E24 | 175763 | 1  | 7  |
| AC238149 | RH086G01 | 174513 | 18 | 5  |
| AC239316 | RH086I08 | 126906 | 7  | 9  |
| AC238150 | RH086I12 | 141237 | 9  | 5  |
| AC238151 | RH086I23 | 141356 | 6  | 5  |
| AC238152 | RH086K18 | 135947 | 3  | 5  |
| AC233445 | RH086K19 | 117666 | 2  | 5  |
| AC238153 | RH086K21 | 148065 | 7  | 1  |
| AC233446 | RH086L02 | 141591 | 9  | 1  |
| AC232066 | RH086L13 | 117026 | 7  | 5  |
| AC238154 | RH086N05 | 142614 | 9  | 6  |
| AC235636 | RH086P08 | 145470 | 21 | 9  |
| AC238155 | RH087A20 | 123711 | 16 | 5  |
| AC238156 | RH087B01 | 123934 | 14 | 6  |
| AC206935 | RH087B02 | 136627 | 5  | 6  |
| AC243383 | RH087D05 | 135824 | 33 | 1  |
| AC235637 | RH087E21 | 166046 | 18 | 9  |
| AC238157 | RH087G06 | 156024 | 30 | 5  |
| AC238158 | RH087G18 | 125116 | 11 | 5  |
| JF317613 | RH087G24 | 116680 | 28 | 12 |
| AC238159 | RH087J11 | 141104 | 10 | 5  |
| AC240307 | RH087L08 | 123183 | 3  | 7  |
| AC243384 | RH087L19 | 141150 | 22 | 5  |
| AC235638 | RH087M15 | 138667 | 8  | 9  |
| AC243033 | RH087N23 |        |    |    |
| AC233447 | RH087P09 | 98599  | 11 | 1  |
| AC234705 | RH087P14 | 115443 | 22 | 6  |
| AC235639 | RH088A01 | 44413  | 7  | 9  |
| AC235640 | RH088A11 | 89639  | 6  | 9  |
| AC232067 | RH088D06 | 204577 | 36 | 1  |
| AC232068 | RH088F19 | 140748 | 15 | 1  |
| AC233448 | RH088J16 | 163631 | 8  | 1  |
| AC236845 | RH088J22 | 140483 | 17 | 6  |
| AC232069 | RH088K23 | 137104 | 10 | 5  |
| AC238160 | RH088M11 | 150225 | 6  | 5  |
| AC233449 | RH088N09 | 137543 | 14 | 1  |
| AC239317 | RH088N16 | 121514 | 10 | 9  |
| AC240000 | RH088N19 | 121522 | 14 | 10 |
| AC238161 | RH088O14 | 133568 | 4  | 5  |
| AC240001 | RH088P22 | 122529 | 5  | 4  |
| AC232070 | RH089A21 | 140253 | 11 | 5  |
| AC217718 | RH089B02 | 111610 | 4  | 1  |
| AC240002 | RH089B20 | 117755 | 18 | 4  |

|          |          |        |    |    |
|----------|----------|--------|----|----|
| AC238162 | RH089B22 | 104413 | 6  | 5  |
| AC233450 | RH089C21 | 129256 | 7  | 5  |
| AC240308 | RH089E05 | 151676 | 4  | 7  |
| AC233451 | RH089G12 | 136732 | 7  | 5  |
| AC217719 | RH089H04 | 155614 | 14 | 1  |
| AC231677 | RH089H13 | 144730 | 2  | 11 |
| AC233622 | RH089H21 | 162795 | 18 | 4  |
| AC233452 | RH089J24 | 145865 | 5  | 1  |
| AC240309 | RH089M13 | 175933 | 3  | 7  |
| AC232071 | RH089M16 | 112300 | 30 | 5  |
| AC232072 | RH089P15 | 131192 | 12 | 1  |
| JF317595 | RH090A13 | 141218 | 10 | 12 |
| AC233453 | RH090A24 | 132891 | 4  | 5  |
| AC232073 | RH090C13 | 133904 | 7  | 1  |
| AC217720 | RH090C16 | 156463 | 9  | 1  |
| AC238163 | RH090D11 | 135724 | 8  | 5  |
| AC233454 | RH090H19 | 141163 | 8  | 1  |
| AC237852 | RH090I18 | 131388 | 10 | 5  |
| AC232074 | RH090P20 | 130104 | 39 | 1  |
| AC238164 | RH091B19 | 139379 | 9  | 5  |
| AC233623 | RH091C23 | 109101 | 6  | 4  |
| AC216948 | RH091E01 | 131337 | 12 | 6  |
| AC238165 | RH091F11 | 120905 | 4  | 5  |
| AC233455 | RH091I22 | 129138 | 8  | 5  |
| AC238166 | RH091K11 | 132792 | 8  | 5  |
| AC239951 | RH091L21 | 131134 | 8  | 0  |
| AC233624 | RH091N09 | 146735 | 10 | 4  |
| AC239318 | RH091N18 | 111365 | 30 | 9  |
| AC232867 | RH091O16 | 144839 | 8  | 6  |
| AC233456 | RH092A06 | 139131 | 6  | 5  |
| AC233457 | RH092A08 | 128641 | 7  | 5  |
| AC240310 | RH092B19 | 160038 | 4  | 7  |
| AC217721 | RH092C10 | 144204 | 4  | 1  |
| AC233458 | RH092E19 | 124597 | 8  | 5  |
| AC238168 | RH092F02 | 114943 | 32 | 5  |
| AC238169 | RH092F14 | 129128 | 11 | 5  |
| AC233459 | RH092H17 | 129833 | 10 | 5  |
| AC233460 | RH092I02 | 137025 | 4  | 1  |
| AC240003 | RH092I19 | 104065 | 19 | 11 |
| AC236587 | RH092J06 | 124887 | 9  | 3  |
| AC233568 | RH092J23 | 135819 | 15 | 6  |
| AC233461 | RH092K12 | 130478 | 16 | 1  |
| AC232638 | RH092O06 | 129639 | 9  | 6  |

|          |          |        |    |    |
|----------|----------|--------|----|----|
| AC216949 | RH092O16 | 144920 | 10 | 6  |
| AC232075 | RH093C02 | 140494 | 14 | 1  |
| AC240004 | RH093C16 | 132480 | 9  | 10 |
| AC238170 | RH093D09 | 177387 | 14 | 5  |
| AC217881 | RH093D13 | 179598 | 26 | 6  |
| AC233462 | RH093D20 | 142157 | 16 | 5  |
| AC238171 | RH093F04 | 136859 | 8  | 1  |
| AC233463 | RH093J03 | 116570 | 12 | 1  |
| AC234706 | RH093J19 | 148743 | 7  | 6  |
| AC209524 | RH093L18 | 98409  | 9  | 1  |
| AC217722 | RH093M10 | 137300 | 7  | 1  |
| AC243385 | RH093O07 | 125568 | 10 | 5  |
| AC217507 | RH094G20 | 138814 | 28 | 6  |
| AC232076 | RH094I11 | 158298 | 14 | 5  |
| AC216950 | RH094I18 | 142314 | 16 | 6  |
| AC237854 | RH094J12 | 136782 | 5  | 0  |
| AC233464 | RH094O09 | 69955  | 11 | 5  |
| AC235641 | RH094P22 | 136196 | 10 | 9  |
| AC237855 | RH095A10 | 126662 | 11 | 0  |
| AC238172 | RH095B14 | 132203 | 15 | 11 |
| AC238173 | RH095B23 | 130428 | 23 | 5  |
| AC240311 | RH095C01 | 149483 | 4  | 4  |
| AC238174 | RH095F15 | 134265 | 36 | 5  |
| AC238175 | RH095F22 | 145254 | 7  | 1  |
| AC238176 | RH095H07 | 181385 | 9  | 6  |
| AC232077 | RH095H15 | 129511 | 3  | 1  |
| AC233465 | RH095I08 | 131634 | 5  | 5  |
| AC217723 | RH095K20 | 131086 | 6  | 1  |
| AC233466 | RH095M08 | 112246 | 11 | 5  |
| AC233625 | RH095M18 | 149275 | 15 | 4  |
| AC243034 | RH095N07 | 33062  | 1  | 11 |
| AC233467 | RH096A06 | 121932 | 6  | 5  |
| AC233626 | RH096A13 | 152612 | 15 | 4  |
| AC233468 | RH096B09 | 119784 | 9  | 5  |
| AC239319 | RH096B19 | 167537 | 13 | 9  |
| AC234536 | RH096E03 | 140434 | 19 | 5  |
| AC232436 | RH096E19 | 128185 | 7  | 6  |
| AC232078 | RH096G02 | 141171 | 15 | 1  |
| AC232079 | RH096H03 | 137964 | 5  | 1  |
| AC238177 | RH096H07 | 143327 | 5  | 5  |
| AC232080 | RH096J16 | 158318 | 27 | 5  |
| AC238178 | RH096M02 | 138755 | 10 | 5  |
| AC238179 | RH096N20 | 168307 | 7  | 5  |

|          |          |        |    |    |
|----------|----------|--------|----|----|
| AC238180 | RH096P03 | 114607 | 6  | 5  |
| AC243386 | RH097B03 | 130511 | 13 | 5  |
| AC235967 | RH097B09 | 189444 | 17 | 6  |
| AC235642 | RH097C18 | 117443 | 6  | 9  |
| AC234537 | RH097E24 | 79638  | 3  | 1  |
| AC239952 | RH097G09 | 126810 | 14 | 10 |
| AC233469 | RH097G11 | 163021 | 5  | 5  |
| AC238181 | RH097I12 | 125325 | 7  | 5  |
| AC232319 | RH097I18 | 147302 | 6  | 11 |
| AC217102 | RH097I24 | 162763 | 15 | 6  |
| AC238182 | RH097J10 | 26750  | 1  | 5  |
| AC238183 | RH097L03 | 126201 | 15 | 1  |
| AC232390 | RH097M07 | 131738 | 9  | 6  |
| AC234590 | RH097M23 | 140554 | 12 | 1  |
| AC233470 | RH097N21 | 86653  | 13 | 5  |
| AC217724 | RH097O05 | 175520 | 8  | 1  |
| AC232081 | RH097P18 | 192342 | 6  | 5  |
| AC240312 | RH098D24 | 191826 | 2  | 7  |
| AC238184 | RH098O13 | 110870 | 9  | 5  |
| AC217725 | RH099H16 | 188282 | 15 | 1  |
| AC238185 | RH099I02 | 108469 | 9  | 5  |
| AC233471 | RH099I16 | 136200 | 16 | 5  |
| AC238186 | RH099K04 | 216437 | 22 | 5  |
| AC238187 | RH099K20 | 57240  | 11 | 5  |
| AC238188 | RH099L08 | 104894 | 20 | 5  |
| AC240005 | RH099L23 | 129721 | 31 | 11 |
| AC238189 | RH099M20 | 17705  | 4  | 5  |
| AC240313 | RH099M22 | 224047 | 5  | 7  |
| AC235643 | RH099P17 | 197497 | 15 | 9  |
| AC238190 | RH100A18 | 118111 | 10 | 9  |
| AC238191 | RH100B06 | 124249 | 20 | 5  |
| AC238192 | RH100D15 | 110487 | 4  | 5  |
| AC238193 | RH100D22 | 82444  | 13 | 5  |
| AC238194 | RH100F15 | 81711  | 14 | 5  |
| AC240314 | RH100G13 | 117981 | 3  | 7  |
| AC232765 | RH100H14 | 175678 | 22 | 6  |
| AC235694 | RH100K12 | 123810 | 2  | 6  |
| AC240121 | RH101C03 | 152770 | 26 | 5  |
| AC240006 | RH101D04 | 115876 | 12 | 11 |
| AC233472 | RH101E03 | 102526 | 3  | 5  |
| AC238195 | RH101H15 | 103945 | 9  | 5  |
| AC240007 | RH101J08 | 151618 | 8  | 11 |
| AC240315 | RH101K20 | 98600  | 1  | 7  |

|          |          |        |    |    |
|----------|----------|--------|----|----|
| AC233473 | RH101L01 | 164784 | 11 | 1  |
| JF317614 | RH101L19 | 141890 | 48 | 12 |
| AC239320 | RH101N09 | 149125 | 10 | 9  |
| AC236588 | RH101P16 | 95510  | 7  | 3  |
| AC238196 | RH101P23 | 116962 | 5  | 5  |
| AC238197 | RH102C09 | 93558  | 22 | 11 |
| AC235644 | RH102G14 | 137525 | 16 | 9  |
| AC206936 | RH102I10 | 138125 | 2  | 6  |
| AC238198 | RH102K09 | 117017 | 13 | 5  |
| AC233474 | RH102L14 | 142435 | 16 | 5  |
| AC238199 | RH102N08 | 165524 | 15 | 1  |
| AC238200 | RH102N16 | 82277  | 8  | 6  |
| AC235968 | RH102N21 | 119342 | 4  | 6  |
| AC233475 | RH103A20 | 177534 | 19 | 5  |
| AC209519 | RH103A21 | 131657 | 4  | 6  |
| AC233476 | RH103B24 | 119163 | 9  | 5  |
| AC233477 | RH103C01 | 94333  | 8  | 5  |
| AC232082 | RH103F08 | 187199 | 21 | 5  |
| AC233478 | RH103F18 | 110394 | 13 | 1  |
| AC238201 | RH103G12 | 115804 | 19 | 5  |
| AC238202 | RH103J11 | 195871 | 12 | 5  |
| AC238203 | RH103O06 | 106521 | 17 | 5  |
| AC238204 | RH103P14 | 140065 | 9  | 5  |
| AC238205 | RH103P17 | 107722 | 9  | 1  |
| AC243387 | RH103P18 | 125671 | 12 | 5  |
| AC233479 | RH104C09 | 132695 | 9  | 5  |
| AC238206 | RH104E01 | 86653  | 13 | 5  |
| AC238207 | RH104E18 | 86345  | 12 | 5  |
| AC233627 | RH104N24 | 133557 | 12 | 4  |
| AC238208 | RH104O02 | 109695 | 9  | 5  |
| AC232083 | RH105A22 | 136895 | 11 | 1  |
| AC237856 | RH105B16 | 124232 | 10 | 5  |
| AC237857 | RH105D06 | 140971 | 5  | 0  |
| AC238209 | RH105E10 | 150457 | 27 | 5  |
| AC233480 | RH105J02 | 129074 | 6  | 1  |
| AC239953 | RH105L18 | 162495 | 19 | 3  |
| AC238210 | RH105N06 | 211329 | 19 | 5  |
| AC240008 | RH105N09 | 67044  | 11 | 11 |
| AC233482 | RH105N22 | 98760  | 8  | 5  |
| AC233483 | RH105O24 | 248025 | 19 | 2  |
| AC231849 | RH105P10 | 186682 | 30 | 6  |
| AC240009 | RH106C02 | 155047 | 24 | 0  |
| AC238211 | RH106C12 | 147384 | 5  | 6  |



|          |          |        |    |    |
|----------|----------|--------|----|----|
| AC237858 | RH106F19 | 104076 | 2  | 0  |
| AC233484 | RH106G12 | 191562 | 11 | 1  |
| AC243388 | RH106G13 | 149845 | 8  | 5  |
| AC232084 | RH106H24 | 96230  | 6  | 1  |
| AC217726 | RH106J13 | 170217 | 8  | 1  |
| AC238212 | RH106O04 | 112694 | 14 | 5  |
| AC238213 | RH109J16 | 183309 | 19 | 5  |
| AC238214 | RH111D07 | 115145 | 8  | 5  |
| AC238215 | RH115J03 | 109210 | 7  | 5  |
| AC238216 | RH115L20 | 117829 | 12 | 5  |
| AC238217 | RH116P21 | 188843 | 14 | 5  |
| AC243389 | RH118N04 | 122238 | 14 | 5  |
| AC238218 | RH119N02 | 147212 | 12 | 5  |
| AC237859 | RH120B09 | 53184  | 3  | 0  |
| AC243035 | RH120F08 | 157001 | 2  | 11 |
| AC233485 | RH120L06 | 99016  | 4  | 1  |
| JF317615 | RH120P23 | 115714 | 11 | 12 |
| AC217727 | RH121C15 | 112581 | 4  | 1  |
| AC232085 | RH121C16 | 16183  | 1  | 5  |
| AC231670 | RH121D01 | 112395 | 1  | 11 |
| AC233486 | RH121D18 | 128611 | 9  | 1  |
| AC237666 | RH121F22 | 132044 | 3  | 3  |
| AC240316 | RH121H04 | 112113 | 4  | 7  |
| AC238219 | RH121H11 | 124539 | 10 | 5  |
| AC233487 | RH121J02 | 114087 | 2  | 5  |
| AC238220 | RH121L12 | 131147 | 12 | 5  |
| AC237860 | RH122C15 | 121070 | 6  | 0  |
| AC240010 | RH122G20 | 110965 | 27 | 9  |
| JF317616 | RH122I19 | 117095 | 15 | 12 |
| AC239321 | RH122I22 | 139257 | 11 | 9  |
| AC217828 | RH122J04 | 123265 | 10 | 6  |
| AC243036 | RH122L11 | 14283  | 1  | 11 |
| AC235645 | RH122M23 | 111602 | 11 | 9  |
| AC232810 | RH122N23 | 157213 | 15 | 6  |
| AC238221 | RH123D21 | 103877 | 6  | 6  |
| AC233488 | RH123G21 | 112128 | 5  | 1  |
| AC234539 | RH123H06 | 141772 | 8  | 1  |
| AC243037 | RH123I06 |        |    |    |
| AC240317 | RH123I15 | 169262 | 7  | 4  |
| AC233489 | RH123J06 | 139205 | 8  | 5  |
| AC238222 | RH123P09 | 69173  | 72 | 6  |
| AC239322 | RH124C01 | 112342 | 9  | 9  |
| JF317617 | RH124C19 | 99021  | 2  | 6  |

|          |          |        |    |    |
|----------|----------|--------|----|----|
| AC233490 | RH124H11 | 155178 | 3  | 1  |
| AC240011 | RH124N10 | 115537 | 7  | 0  |
| AC233491 | RH124O16 | 129517 | 5  | 1  |
| AC217646 | RH125A20 | 126107 | 9  | 6  |
| AC238223 | RH125C20 | 130992 | 21 | 5  |
| AC233492 | RH125C24 | 117182 | 8  | 1  |
| AC239178 | RH125E03 | 121800 | 6  | 3  |
| AC240012 | RH125E08 | 112587 | 19 | 0  |
| AC240318 | RH125G05 | 113702 | 7  | 7  |
| AC238224 | RH125G09 | 116894 | 19 | 5  |
| AC232086 | RH125H16 | 125710 | 2  | 1  |
| AC238225 | RH125I04 | 115508 | 12 | 5  |
| AC234707 | RH125I21 | 130517 | 20 | 6  |
| AC240013 | RH125J07 | 136617 | 13 | 0  |
| AC238226 | RH125M03 | 100943 | 16 | 5  |
| AC240014 | RH125M10 | 131579 | 6  | 11 |
| AC240319 | RH126B22 | 153442 | 6  | 7  |
| JF317590 | RH126B24 | 92652  | 12 | 12 |
| AC233493 | RH126D06 | 187374 | 17 | 1  |
| AC233494 | RH126H02 | 107063 | 1  | 5  |
| AC238227 | RH126I21 | 121278 | 18 | 6  |
| HQ896309 | RH126J23 | 77110  | 1  | 0  |
| AC240122 | RH126O17 | 113648 | 11 | 5  |
| AC236589 | RH126P10 | 131948 | 8  | 3  |
| AC234708 | RH127B20 | 108720 | 4  | 6  |
| AC234540 | RH127E04 | 116744 | 7  | 5  |
| AC238228 | RH127F09 | 128541 | 10 | 5  |
| AC238229 | RH127I11 | 113616 | 3  | 5  |
| AC243390 | RH127J02 | 159385 | 18 | 8  |
| AC216951 | RH127J15 | 127575 | 4  | 6  |
| AC232087 | RH127K11 | 158801 | 11 | 5  |
| AC237861 | RH127M01 | 114619 | 3  | 0  |
| AC238967 | RH127M02 | 170059 | 11 | 3  |
| AC238230 | RH128A06 | 108270 | 18 | 5  |
| AC234709 | RH128E11 | 136255 | 10 | 6  |
| AC240015 | RH128F11 | 115521 | 9  | 11 |
| AC238231 | RH128F20 | 47967  | 2  | 5  |
| AC209525 | RH128G04 | 55865  | 12 | 1  |
| AC235646 | RH128G19 | 162858 | 25 | 9  |
| AC243038 | RH128H14 | 29576  | 1  | 11 |
| AC238232 | RH128H15 | 130824 | 9  | 5  |
| AC232088 | RH128L19 | 142844 | 8  | 1  |
| AC238233 | RH128L23 | 100401 | 15 | 5  |

|          |          |        |    |    |
|----------|----------|--------|----|----|
| AC240320 | RH128M24 | 124797 | 1  | 7  |
| AC237667 | RH128N23 | 110413 | 10 | 3  |
| AC243039 | RH129024 |        |    |    |
| AC240016 | RH129B02 | 154459 | 13 | 8  |
| AC240017 | RH129G22 | 118739 | 6  | 10 |
| AC239323 | RH129L15 | 89758  | 34 | 9  |
| AC243391 | RH129M17 | 40156  | 5  | 1  |
| AC233495 | RH130E21 | 90031  | 12 | 5  |
| AC233496 | RH130G14 | 144858 | 7  | 1  |
| AC232089 | RH130I12 | 108580 | 9  | 5  |
| AC232318 | RH130I13 | 60790  | 1  | 11 |
| AC234541 | RH130I21 | 125818 | 4  | 1  |
| AC238234 | RH130J23 | 101666 | 17 | 1  |
| AC233497 | RH130L03 | 106774 | 2  | 5  |
| AC237862 | RH130M06 | 42126  | 1  | 0  |
| AC237863 | RH130M21 | 114214 | 6  | 0  |
| AC238235 | RH130O22 | 120500 | 6  | 5  |
| AC213724 | RH130P10 | 144534 | 12 | 6  |
| AC240018 | RH130P11 | 114002 | 6  | 10 |
| AC238236 | RH131F18 | 126713 | 10 | 5  |
| AC238237 | RH131J02 | 99867  | 11 | 5  |
| AC243392 | RH131O15 | 109176 | 20 | 5  |
| AC238238 | RH131P02 | 129196 | 13 | 5  |
| AC238239 | RH132B19 | 111235 | 13 | 5  |
| AC233498 | RH132C18 | 123107 | 10 | 5  |
| AC233499 | RH132D05 | 113427 | 13 | 5  |
| AC233500 | RH132E14 | 129475 | 12 | 1  |
| AC238240 | RH132J19 | 151495 | 9  | 5  |
| AC236590 | RH132M21 | 125317 | 6  | 3  |
| AC238241 | RH132O23 | 134166 | 9  | 5  |
| AC238242 | RH132P09 | 117597 | 7  | 5  |
| AC238243 | RH132P23 | 123378 | 10 | 5  |
| AC240019 | RH133D07 | 124763 | 5  | 10 |
| AC238244 | RH133F12 | 41229  | 5  | 5  |
| AC236626 | RH133G12 | 155945 | 30 | 5  |
| AC240321 | RH133H05 | 127171 | 2  | 7  |
| AC238245 | RH133I18 | 108706 | 7  | 5  |
| AC238246 | RH133N20 | 123430 | 4  | 5  |
| AC235647 | RH134A22 | 129193 | 20 | 9  |
| AC238247 | RH134E14 | 147837 | 11 | 5  |
| AC234697 | RH134F01 | 115623 | 5  | 6  |
| AC232090 | RH134G07 | 127567 | 3  | 5  |
| AC238248 | RH134G11 | 170374 | 7  | 5  |

|          |          |        |    |         |
|----------|----------|--------|----|---------|
| AC236591 | RH134I23 | 133358 | 9  | 3       |
| AC240322 | RH134L03 | 128341 | 7  | 7       |
| AC236746 | RH134M14 | 128790 | 4  | 4       |
| AC233501 | RH134N13 | 130707 | 3  | 1       |
| AC236627 | RH134P05 | 154819 | 6  | 1       |
| AC233628 | RH135G07 | 102676 | 7  | 4       |
| AC235648 | RH135I22 | 121709 | 2  | 9       |
| AC237864 | RH135L11 | 110147 | 3  | 0       |
| AC237865 | RH135M18 | 148586 | 6  | 0       |
| AC238249 | RH135N06 | 125738 | 5  | 5       |
| AC238250 | RH136E22 | 108118 | 4  | 5       |
| AC233502 | RH136G24 | 141561 | 13 | 1       |
| AC234542 | RH136H10 | 110875 | 6  | 1       |
| AC240020 | RH136H12 | 117436 | 7  | 0       |
| AC238251 | RH136H24 | 120208 | 3  | 5       |
| AC233629 | RH136J13 | 157089 | 18 | 4       |
| AC234690 | RH136K02 | 121609 | 11 | 6       |
| AC238252 | RH136K19 | 111906 | 5  | 5       |
| AC238253 | RH136O01 | 115575 | 3  | 5       |
| AC233503 | RH137J18 | 116657 | 8  | 1       |
| AC236846 | RH137K05 | 109491 | 10 | 6       |
| AC237866 | RH137K16 | 50554  | 3  | 0       |
| AC233504 | RH137L15 | 110496 | 2  | 5       |
| AC238254 | RH138C23 | 109709 | 4  | 5       |
| AC232091 | RH138F06 | 132958 | 20 | 1       |
| JF317618 | RH138F16 | 143697 | 2  | 12      |
| AC240356 | RH138I21 | 115369 | 5  | unknown |
| AC238255 | RH138K13 | 60896  | 3  | 5       |
| AC240123 | RH138M23 | 103532 | 14 | 4       |
| AC238256 | RH138N05 | 116871 | 8  | 5       |
| AC239324 | RH138P01 | 146975 | 11 | 9       |
| AC240021 | RH139C15 | 94472  | 16 | 0       |
| AC213863 | RH139E21 | 100286 | 13 | 6       |
| AC240022 | RH139G21 | 97193  | 20 | 11      |
| AC239325 | RH139I09 | 136967 | 13 | 9       |
| AC240023 | RH140F06 | 148677 | 10 | 9       |
| AC235649 | RH140N04 | 119760 | 18 | 9       |
| AC233505 | RH140O18 | 132299 | 8  | 1       |
| AC238257 | RH140O20 | 124246 | 5  | 1       |
| AC232092 | RH141A04 | 42339  | 2  | 0       |
| AC233506 | RH141C04 | 157767 | 10 | 5       |
| AC240024 | RH141E03 | 67479  | 11 | 11      |
| AC240323 | RH141J16 | 49784  | 1  | 7       |

|          |          |        |    |         |
|----------|----------|--------|----|---------|
| AC233507 | RH141L09 | 121354 | 3  | 1       |
| AC237869 | RH141L24 | 154076 | 19 | 5       |
| AC238258 | RH141P08 | 124351 | 5  | 5       |
| AC237870 | RH141P18 | 122053 | 1  | 0       |
| AC240025 | RH142A12 | 129211 | 7  | 7       |
| AC233508 | RH142B11 | 134783 | 2  | 1       |
| AC238259 | RH142B16 | 116618 | 7  | 5       |
| AC235650 | RH142C19 | 112654 | 13 | 9       |
| AC240026 | RH142H10 | 48990  | 24 | 10      |
| AC236747 | RH142I08 | 160103 | 8  | 4       |
| AC232093 | RH142J23 | 137258 | 3  | 1       |
| AC240027 | RH142K09 | 58772  | 17 | 4       |
| AC238260 | RH142L01 | 109862 | 7  | 5       |
| AC233509 | RH142M15 | 115114 | 3  | 5       |
| AC231973 | RH143A24 | 128145 | 12 | 6       |
| AC233510 | RH143C20 | 109345 | 6  | 5       |
| AC232094 | RH143D14 | 123864 | 4  | 0       |
| AC240324 | RH143L23 | 131436 | 4  | 7       |
| AC238261 | RH143M21 | 101642 | 3  | 4       |
| AC233511 | RH144D22 | 150523 | 11 | 1       |
| AC238262 | RH144F10 | 111116 | 6  | 5       |
| AC238263 | RH144F22 | 125635 | 6  | 5       |
| AC240028 | RH144F23 | 67146  | 7  | 0       |
| AC238264 | RH144G18 | 130041 | 5  | 5       |
| AC237668 | RH144I14 | 111698 | 4  | 3       |
| AC238265 | RH144I18 | 134804 | 19 | 5       |
| AC234543 | RH144I22 | 121796 | 11 | 1       |
| AC238266 | RH144J06 | 122846 | 10 | 1       |
| AC243042 | RH144O01 | 50076  | 1  | 11      |
| AC236629 | RH144O02 | 153514 | 15 | 5       |
| AC238267 | RH144O03 | 139457 | 17 | 5       |
| AC240029 | RH144P01 | 125795 | 7  | 11      |
| AC232095 | RH145A24 | 177462 | 17 | 1       |
| AC240124 | RH145B06 | 92215  | 3  | 9       |
| AC232096 | RH145B23 | 97125  | 26 | 1       |
| AC217647 | RH145D12 | 23917  | 3  | unknown |
| AC240030 | RH145E19 | 124429 | 21 | 0       |
| AC218123 | RH145G10 | 126206 | 10 | 6       |
| AC238268 | RH145H03 | 139567 | 9  | 4       |
| AC239326 | RH145H21 | 141031 | 8  | 9       |
| AC239327 | RH145K07 | 65996  | 3  | 9       |
| AC233512 | RH145L13 | 119162 | 4  | 1       |
| AC233513 | RH145M01 | 129980 | 3  | 1       |

|          |          |        |    |    |
|----------|----------|--------|----|----|
| AC240325 | RH146A02 | 128766 | 4  | 7  |
| AC243043 | RH146E08 |        |    |    |
| AC233514 | RH146F20 | 111833 | 7  | 1  |
| JF317619 | RH146H02 | 107907 | 11 | 12 |
| AC240031 | RH147C10 | 118848 | 11 | 0  |
| AC238269 | RH147D22 | 120528 | 6  | 5  |
| AC238270 | RH147E16 | 113145 | 7  | 5  |
| AC234544 | RH147F16 | 123148 | 8  | 1  |
| AC240125 | RH147G23 | 124402 | 17 | 1  |
| AC243393 | RH147I01 | 158168 | 16 | 12 |
| AC238271 | RH147J19 | 112134 | 3  | 3  |
| AC233630 | RH147K10 | 146706 | 9  | 4  |
| AC216952 | RH147M20 | 119959 | 8  | 6  |
| AC238272 | RH147M21 | 132633 | 16 | 5  |
| AC238273 | RH148B08 | 130236 | 11 | 3  |
| AC233515 | RH148B12 | 132098 | 6  | 2  |
| AC239954 | RH148D02 | 125322 | 4  | 11 |
| AC239328 | RH148E07 | 135531 | 12 | 9  |
| AC232097 | RH148K09 | 145288 | 9  | 1  |
| AC238274 | RH148L18 | 64268  | 4  | 6  |
| AC236630 | RH148O06 | 109051 | 19 | 1  |
| AC237873 | RH148O20 | 76225  | 1  | 0  |
| AC232098 | RH149A16 | 143176 | 21 | 1  |
| AC238275 | RH149C08 | 111376 | 13 | 5  |
| AC233516 | RH149C23 | 112767 | 5  | 1  |
| AC236631 | RH149D09 | 95784  | 8  | 1  |
| AC232099 | RH149F06 | 120617 | 13 | 5  |
| AC240326 | RH149F10 | 127995 | 3  | 4  |
| AC237874 | RH149G10 | 108837 | 6  | 0  |
| AC238276 | RH149H18 | 126777 | 10 | 5  |
| AC235651 | RH149J19 | 135531 | 8  | 9  |
| AC232100 | RH149K08 | 146720 | 6  | 5  |
| AC233517 | RH149K17 | 71623  | 2  | 1  |
| AC232101 | RH149L10 | 116280 | 4  | 0  |
| AC243394 | RH149L23 | 122572 | 4  | 5  |
| AC238277 | RH149N09 | 114425 | 1  | 5  |
| AC235652 | RH149P12 | 117414 | 4  | 9  |
| AC238278 | RH150D03 | 111185 | 7  | 5  |
| AC232102 | RH150D18 | 42511  | 1  | 0  |
| AC240327 | RH150F15 | 112382 | 9  | 7  |
| AC238279 | RH150G07 | 119380 | 9  | 5  |
| AC238280 | RH150G14 | 181388 | 18 | 5  |
| AC240032 | RH150H11 | 112825 | 10 | 0  |

|          |          |        |    |    |
|----------|----------|--------|----|----|
| AC231524 | RH150K08 | 109230 | 10 | 6  |
| AC240033 | RH150L02 | 141580 | 6  | 0  |
| AC232878 | RH150M13 | 165649 | 18 | 6  |
| AC232103 | RH150M21 | 47603  | 3  | 0  |
| AC238281 | RH150O10 | 118989 | 5  | 5  |
| AC238282 | RH151B14 | 84888  | 23 | 1  |
| AC238283 | RH151C01 | 111931 | 6  | 6  |
| AC238284 | RH151F02 | 130695 | 2  | 5  |
| AC240034 | RH151J09 | 134225 | 10 | 0  |
| AC240035 | RH151K12 | 101295 | 5  | 0  |
| AC235969 | RH151K19 | 121044 | 10 | 6  |
| AC234546 | RH151M01 | 112928 | 9  | 1  |
| AC234591 | RH151M22 | 133521 | 15 | 5  |
| AC236632 | RH151P03 | 114710 | 9  | 5  |
| AC243044 | RH152E20 |        |    |    |
| AC233518 | RH152G01 | 123093 | 7  | 1  |
| AC232105 | RH152G12 | 52346  | 2  | 0  |
| AC238285 | RH152M02 | 109860 | 13 | 1  |
| AC238974 | RH152M21 | 108736 | 1  | 0  |
| AC238286 | RH153A03 | 122198 | 24 | 1  |
| AC235970 | RH153A08 | 126689 | 10 | 6  |
| AC238287 | RH153B22 | 130431 | 10 | 5  |
| AC235653 | RH153C21 | 118789 | 2  | 9  |
| AC238288 | RH153F16 | 106063 | 2  | 5  |
| AC238289 | RH153F19 | 113547 | 7  | 5  |
| AC238290 | RH153M18 | 104934 | 4  | 5  |
| AC238291 | RH153N17 | 107470 | 7  | 12 |
| AC235654 | RH154D19 | 145972 | 14 | 9  |
| AC243395 | RH154G05 | 122011 | 14 | 5  |
| AC240036 | RH154I16 | 103130 | 7  | 0  |
| AC240037 | RH154J09 | 109560 | 5  | 9  |
| AC238292 | RH155M20 | 130611 | 6  | 11 |
| AC238293 | RH156F04 | 110014 | 6  | 6  |
| AC232106 | RH156I19 | 119226 | 17 | 1  |
| AC240038 | RH156J02 | 81128  | 20 | 11 |
| AC232107 | RH156M09 | 123903 | 7  | 1  |
| AC243396 | RH156N08 | 133931 | 9  | 1  |
| AC233631 | RH157C17 | 128689 | 6  | 4  |
| AC238294 | RH157C24 | 110364 | 10 | 1  |
| AC240039 | RH157I11 | 40190  | 9  | 0  |
| AC240040 | RH157M15 | 94656  | 3  | 0  |
| AC238295 | RH158C09 | 131879 | 19 | 5  |
| AC233519 | RH158F19 | 129776 | 7  | 5  |

|          |          |        |    |    |
|----------|----------|--------|----|----|
| AC238296 | RH158G03 | 113364 | 6  | 5  |
| AC234547 | RH158H10 | 110406 | 10 | 1  |
| AC238297 | RH158J20 | 127796 | 13 | 5  |
| AC238298 | RH158K01 | 101464 | 41 | 1  |
| AC238299 | RH158K09 | 59416  | 23 | 6  |
| AC217728 | RH158N18 | 152248 | 7  | 1  |
| JF317620 | RH158O09 | 87252  | 25 | 12 |
| AC233632 | RH159A24 | 145425 | 12 | 4  |
| AC236633 | RH159C21 | 128394 | 12 | 1  |
| AC238300 | RH159D04 | 82783  | 8  | 1  |
| AC238968 | RH159E15 | 125731 | 2  | 3  |
| AC240328 | RH159J14 | 114575 | 1  | 7  |
| AC234548 | RH159L02 | 121642 | 6  | 1  |
| AC238301 | RH159L13 | 104500 | 4  | 5  |
| AC238302 | RH159M14 | 155360 | 4  | 5  |
| AC238303 | RH159N19 | 110491 | 5  | 5  |
| AC236714 | RH159O01 | 132236 | 10 | 3  |
| AC238304 | RH159P03 | 56898  | 20 | 6  |
| JF317621 | RH159P17 | 70361  | 2  | 12 |
| AC238305 | RH160A07 | 82531  | 5  | 1  |
| AC217729 | RH160B23 | 146900 | 6  | 1  |
| AC204500 | RH160C14 | 137278 | 4  | 6  |
| AC240329 | RH160E03 | 128080 | 4  | 7  |
| AC237669 | RH160E15 | 120723 | 1  | 0  |
| AC235655 | RH160F08 | 115853 | 28 | 9  |
| AC233520 | RH160F18 | 110508 | 6  | 5  |
| AC240041 | RH160G21 | 104759 | 9  | 7  |
| AC240042 | RH160J08 | 111146 | 3  | 0  |
| AC231548 | RH160K03 | 119705 | 4  | 6  |
| AC243397 | RH160L13 | 30199  | 2  | 5  |
| AC238306 | RH160N05 | 107029 | 4  | 12 |
| AC243398 | RH160O21 | 112031 | 3  | 5  |
| AC236847 | RH161M15 | 130871 | 8  | 6  |
| AC217817 | RH161N18 | 114620 | 11 | 6  |
| AC233633 | RH162B09 | 142953 | 7  | 4  |
| AC238307 | RH162D01 | 114237 | 11 | 4  |
| AC238308 | RH162D10 | 123931 | 6  | 5  |
| AC238309 | RH162D21 | 112043 | 6  | 5  |
| AC240330 | RH162E09 | 121686 | 4  | 7  |
| AC238310 | RH162G20 | 53880  | 13 | 5  |
| AC238311 | RH162H12 | 121444 | 20 | 5  |
| AC234549 | RH162L11 | 122555 | 9  | 1  |
| AC238312 | RH162L15 | 160294 | 10 | 5  |



|          |          |        |    |    |
|----------|----------|--------|----|----|
| AC236748 | RH162M08 | 164840 | 9  | 4  |
| AC243046 | RH162O21 |        |    |    |
| AC238313 | RH162P07 | 130722 | 5  | 10 |
| AC232108 | RH163B17 | 112903 | 7  | 1  |
| AC238314 | RH163C24 | 129104 | 5  | 12 |
| AC216953 | RH163H01 | 103198 | 9  | 6  |
| AC240331 | RH163I17 | 136901 | 6  | 4  |
| AC240043 | RH163J17 | 109117 | 12 | 7  |
| AC217730 | RH163K01 | 106002 | 4  | 1  |
| AC238315 | RH163O01 | 85548  | 12 | 5  |
| AC238316 | RH163O08 | 150282 | 12 | 5  |
| AC243399 | RH164A15 | 114323 | 11 | 5  |
| AC232709 | RH164L12 | 104512 | 11 | 6  |
| AC238317 | RH164L24 | 122297 | 6  | 5  |
| AC217731 | RH164M22 | 176933 | 11 | 1  |
| AC236848 | RH164O16 | 105990 | 8  | 6  |
| AC234550 | RH165A17 | 48291  | 3  | 1  |
| AC238318 | RH165C09 | 131010 | 5  | 5  |
| AC238319 | RH165C22 | 118447 | 8  | 5  |
| AC233521 | RH165C24 | 91978  | 1  | 1  |
| AC238320 | RH165G13 | 108116 | 9  | 5  |
| AC235656 | RH165G14 | 127637 | 9  | 9  |
| AC233522 | RH165H04 | 126580 | 7  | 5  |
| AC232109 | RH165I16 | 50682  | 8  | 0  |
| AC239329 | RH165J16 | 110660 | 6  | 9  |
| AC232110 | RH165K04 | 44696  | 2  | 0  |
| AC238321 | RH165M06 | 114723 | 5  | 5  |
| AC240126 | RH165O03 | 115222 | 15 | 5  |
| AC238322 | RH166C13 | 109207 | 15 | 5  |
| AC240127 | RH166D06 | 135815 | 25 | 5  |
| AC238323 | RH166F01 | 121106 | 2  | 5  |
| AC243400 | RH166F13 | 130291 | 12 | 5  |
| AC238324 | RH166G03 | 110982 | 12 | 1  |
| AC236634 | RH166G13 | 122905 | 11 | 5  |
| AC240044 | RH166M24 | 103504 | 15 | 11 |
| AC243047 | RH166M24 |        |    |    |
| AC240045 | RH167A12 | 165060 | 21 | 8  |
| AC238325 | RH167B02 | 113727 | 9  | 5  |
| AC234551 | RH167C13 | 111643 | 9  | 1  |
| AC238326 | RH167C18 | 104155 | 11 | 5  |
| AC238327 | RH167D14 | 114692 | 15 | 5  |
| AC238328 | RH167E24 | 116863 | 11 | 5  |
| AC238329 | RH167G22 | 133079 | 29 | 5  |

|          |          |        |    |    |
|----------|----------|--------|----|----|
| AC238330 | RH167I06 | 108157 | 8  | 5  |
| AC240332 | RH167I20 | 110882 | 6  | 7  |
| AC238331 | RH167J04 | 129864 | 14 | 6  |
| AC238332 | RH167J15 | 130481 | 15 | 1  |
| AC232111 | RH167J23 | 120284 | 1  | 5  |
| AC238333 | RH167M08 | 115248 | 2  | 5  |
| AC233523 | RH167N12 | 133687 | 10 | 1  |
| AC232112 | RH167N13 | 117897 | 6  | 1  |
| AC234552 | RH167O11 | 104396 | 10 | 5  |
| AC243401 | RH167O20 | 108862 | 6  | 5  |
| AC238334 | RH167O23 | 114162 | 14 | 5  |
| AC240333 | RH168B10 | 191915 | 3  | 7  |
| AC237875 | RH168B16 | 39951  | 1  | 0  |
| AC232811 | RH168D09 | 114221 | 10 | 6  |
| AC239330 | RH168F09 | 107795 | 6  | 9  |
| AC243402 | RH168G10 | 153165 | 12 | 5  |
| AC233634 | RH168I03 | 112175 | 6  | 4  |
| AC233524 | RH168I06 | 121813 | 8  | 5  |
| AC240334 | RH168N10 | 128428 | 8  | 7  |
| AC232113 | RH169C15 | 119926 | 5  | 1  |
| AC238335 | RH169D20 | 15285  | 2  | 5  |
| AC238336 | RH169F21 | 160146 | 19 | 6  |
| AC238337 | RH169I18 | 114456 | 3  | 5  |
| AC238338 | RH169K01 | 137150 | 9  | 5  |
| AC240046 | RH169K05 | 140006 | 9  | 10 |
| AC232389 | RH169M08 | 125787 | 6  | 6  |
| AC238339 | RH170A06 | 100095 | 12 | 5  |
| AC234553 | RH170A10 | 130471 | 18 | 1  |
| AC240047 | RH170E13 | 113498 | 16 | 0  |
| AC234554 | RH170G14 | 99200  | 8  | 5  |
| AC233525 | RH170I10 | 141710 | 12 | 5  |
| AC233526 | RH170J20 | 130173 | 5  | 1  |
| AC243049 | RH170L21 |        |    |    |
| AC240335 | RH170M01 | 139517 | 3  | 7  |
| AC238340 | RH170N15 | 103665 | 22 | 11 |
| AC238341 | RH170N19 | 92697  | 3  | 5  |
| AC238342 | RH170O21 | 26477  | 1  | 5  |
| AC238343 | RH171B14 | 108082 | 9  | 0  |
| AC233527 | RH171E23 | 116278 | 6  | 5  |
| AC243403 | RH171H17 | 149452 | 25 | 5  |
| AC234555 | RH171I01 | 108288 | 6  | 5  |
| AC239331 | RH171I16 | 118230 | 4  | 9  |
| AC232114 | RH171N08 | 112720 | 11 | 5  |

|          |          |        |    |    |
|----------|----------|--------|----|----|
| AC240336 | RH171N15 | 136950 | 3  | 7  |
| AC216954 | RH171N20 | 121085 | 2  | 6  |
| AC237101 | RH171P07 | 105998 | 13 | 3  |
| AC237876 | RH171P20 | 56479  | 6  | 0  |
| AC234592 | RH172A11 | 132202 | 10 | 5  |
| AC243404 | RH172A21 | 122071 | 12 | 5  |
| AC238344 | RH172C14 | 113663 | 5  | 6  |
| AC238345 | RH172D24 | 110794 | 16 | 5  |
| AC234593 | RH172E15 | 139641 | 24 | 5  |
| AC238346 | RH172G10 | 103003 | 10 | 5  |
| AC240048 | RH172G12 | 66117  | 31 | 9  |
| AC232115 | RH172J22 | 198263 | 17 | 1  |
| AC236635 | RH172L21 | 106756 | 5  | 1  |
| AC238347 | RH172N06 | 130619 | 3  | 5  |
| AC235971 | RH173B21 | 111037 | 6  | 6  |
| AC238348 | RH173E05 | 127710 | 6  | 5  |
| AC238349 | RH173E21 | 21117  | 2  | 5  |
| AC234556 | RH173F13 | 88193  | 26 | 0  |
| AC233635 | RH173G11 | 116738 | 5  | 4  |
| AC238350 | RH173H12 | 66528  | 7  | 12 |
| AC233528 | RH173I04 | 130153 | 14 | 1  |
| AC238351 | RH173N10 | 116875 | 5  | 5  |
| AC232116 | RH174E07 | 104902 | 8  | 0  |
| AC240049 | RH174G13 | 109324 | 5  | 8  |
| AC238352 | RH174H15 | 107949 | 5  | 0  |
| AC240337 | RH174J15 | 107491 | 2  | 7  |
| AC237877 | RH174K15 | 31065  | 1  | 0  |
| AC216955 | RH174L03 | 165803 | 13 | 6  |
| AC237878 | RH175B04 | 116224 | 12 | 0  |
| AC237879 | RH175D24 | 149315 | 22 | 5  |
| AC240050 | RH175H08 | 126235 | 9  | 0  |
| AC217732 | RH175L13 | 116343 | 5  | 1  |
| AC235657 | RH176B23 | 111569 | 6  | 9  |
| AC237880 | RH176O03 | 78176  | 2  | 0  |
| AC237881 | RH176P20 | 107336 | 13 | 0  |
| AC237882 | RH176P24 | 111048 | 6  | 0  |
| AC238353 | RH177A02 | 107364 | 9  | 5  |
| AC233529 | RH177F15 | 105068 | 10 | 5  |
| AC234557 | RH177G23 | 51443  | 5  | 0  |
| AC237883 | RH177I17 | 111017 | 7  | 0  |
| AC238354 | RH177J01 | 108475 | 14 | 5  |
| AC217039 | RH177L07 | 128278 | 12 | 6  |
| AC237884 | RH177L23 | 140308 | 11 | 0  |

|          |          |        |    |    |
|----------|----------|--------|----|----|
| AC237885 | RH177M24 | 54253  | 6  | 0  |
| AC240338 | RH178C19 | 160127 | 5  | 7  |
| AC238355 | RH178I23 | 127264 | 8  | 1  |
| AC238356 | RH178O02 | 117011 | 3  | 5  |
| AC233530 | RH179B16 | 97964  | 8  | 1  |
| AC238357 | RH179C19 | 100445 | 6  | 4  |
| AC236749 | RH179G04 | 122943 | 9  | 4  |
| AC240339 | RH179H03 | 176194 | 6  | 7  |
| AC234784 | RH179H13 | 230818 | 63 | 6  |
| AC217733 | RH179H19 | 134851 | 3  | 1  |
| AC231671 | RH179O17 | 153913 | 3  | 11 |
| AC240051 | RH180C13 | 109486 | 14 | 10 |
| AC233636 | RH180E04 | 147623 | 12 | 4  |
| AC233531 | RH180G18 | 118531 | 4  | 1  |
| AC240128 | RH180I09 | 121934 | 52 | 1  |
| AC237886 | RH180K14 | 107640 | 4  | 0  |
| AC233532 | RH181C08 | 109583 | 11 | 1  |
| AC238358 | RH181C12 | 144928 | 5  | 5  |
| AC237887 | RH181D06 | 37042  | 1  | 0  |
| AC238359 | RH181E11 | 129389 | 13 | 1  |
| AC238360 | RH181E24 | 137732 | 6  | 5  |
| AC240052 | RH181H24 | 127983 | 11 | 5  |
| AC238361 | RH181J07 | 105886 | 5  | 5  |
| AC234559 | RH181N01 | 137968 | 13 | 1  |
| AC243050 | RH182G13 |        |    |    |
| AC233637 | RH182K13 | 126730 | 8  | 4  |
| AC238362 | RH182N11 | 115260 | 3  | 5  |
| AC240340 | RH182P02 | 124685 | 6  | 7  |
| AC235658 | RH183G07 | 103827 | 12 | 9  |
| AC234594 | RH183K03 | 129183 | 12 | 1  |
| AC237888 | RH183L22 | 31025  | 1  | 0  |
| AC237889 | RH183M06 | 40280  | 2  | 5  |
| AC240053 | RH184A02 | 145593 | 15 | 0  |
| JF317622 | RH184C22 | 97959  | 11 | 12 |
| AC238363 | RH184D14 | 106002 | 8  | 5  |
| AC239333 | RH184G10 | 119006 | 8  | 9  |
| AC240341 | RH184I18 | 151632 | 3  | 7  |
| AC240054 | RH184K12 | 71258  | 16 | 1  |
| AC240129 | RH184K24 | 150930 | 16 | 10 |
| AC238364 | RH184L04 | 106794 | 16 | 5  |
| AC243405 | RH184M23 | 72672  | 3  | 1  |
| AC238365 | RH184N07 | 118276 | 3  | 5  |
| AC238366 | RH185B09 | 115295 | 3  | 0  |

|          |          |        |    |    |
|----------|----------|--------|----|----|
| AC233533 | RH185B10 | 112612 | 9  | 1  |
| AC238367 | RH185C17 | 120768 | 8  | 12 |
| AC240055 | RH185F02 | 116582 | 6  | 11 |
| AC236849 | RH185G09 | 159361 | 23 | 6  |
| AC233534 | RH185H09 | 121350 | 12 | 5  |
| AC238368 | RH185I12 | 123206 | 4  | 1  |
| AC238369 | RH185L11 | 127206 | 15 | 5  |
| AC238370 | RH185O05 | 98444  | 13 | 5  |
| AC238371 | RH185P10 | 114613 | 11 | 5  |
| AC240056 | RH186A15 | 167905 | 14 | 11 |
| AC233535 | RH186C12 | 122327 | 9  | 5  |
| AC240057 | RH186C17 | 102618 | 1  | 9  |
| AC237084 | RH186D16 | 127517 | 12 | 3  |
| AC240058 | RH186E11 | 116598 | 7  | 10 |
| AC236750 | RH186E19 | 136556 | 5  | 4  |
| AC238372 | RH186H09 | 115307 | 8  | 6  |
| AC237890 | RH186I21 | 142401 | 4  | 0  |
| AC239334 | RH186K05 | 89141  | 6  | 9  |
| AC240342 | RH186K23 | 131661 | 2  | 7  |
| AC235972 | RH186L05 | 102160 | 11 | 6  |
| AC231672 | RH186L12 | 124595 | 1  | 11 |
| AC237891 | RH186O03 | 143069 | 8  | 0  |
| AC238373 | RH187A20 | 127429 | 4  | 5  |
| AC236637 | RH187B23 | 107068 | 7  | 1  |
| AC238374 | RH187I08 | 117557 | 7  | 2  |
| AC243051 | RH187J22 |        |    |    |
| AC238375 | RH188A15 | 98645  | 12 | 5  |
| AC237892 | RH188B03 | 134279 | 10 | 0  |
| AC238376 | RH188B06 | 122032 | 7  | 5  |
| AC236638 | RH188C09 | 141707 | 13 | 1  |
| AC237893 | RH188F23 | 108072 | 8  | 0  |
| AC236639 | RH188J06 | 112167 | 7  | 1  |
| AC217734 | RH188J09 | 100373 | 9  | 1  |
| AC234595 | RH188M09 | 128679 | 22 | 1  |
| AC238377 | RH188M18 | 126710 | 21 | 5  |
| AC214037 | RH188N15 | 149623 | 12 | 6  |
| AC239335 | RH188O21 | 130066 | 13 | 9  |
| AC238378 | RH189F04 | 110197 | 3  | 5  |
| AC234560 | RH189H09 | 141379 | 11 | 1  |
| AC238379 | RH189J11 | 121332 | 8  | 5  |
| AC238969 | RH189K17 | 126080 | 8  | 3  |
| AC239336 | RH190A17 | 101734 | 5  | 9  |
| AC238380 | RH190C13 | 104211 | 7  | 5  |

|          |          |        |    |    |
|----------|----------|--------|----|----|
| AC235659 | RH190E04 | 132833 | 15 | 9  |
| AC239337 | RH190G21 | 111567 | 9  | 9  |
| AC240059 | RH190I20 | 107191 | 1  | 7  |
| AC238381 | RH190J05 | 116490 | 6  | 5  |
| AC238382 | RH191A05 | 126422 | 9  | 5  |
| AC237894 | RH191B13 | 142527 | 14 | 0  |
| AC238383 | RH191B23 | 137833 | 4  | 5  |
| AC240060 | RH191E08 | 120385 | 4  | 0  |
| AC238384 | RH191G07 | 122344 | 9  | 5  |
| AC233638 | RH191G20 | 37232  | 2  | 4  |
| AC237895 | RH191I22 | 147670 | 14 | 5  |
| AC237896 | RH191J01 | 112221 | 6  | 0  |
| AC233639 | RH191L17 | 110000 | 8  | 4  |
| AC238385 | RH191M06 | 122692 | 8  | 5  |
| AC239778 | RH191M23 | 95764  | 1  | 0  |
| AC239338 | RH191O06 | 117627 | 1  | 9  |
| AC239339 | RH192C09 | 107014 | 3  | 9  |
| AC238386 | RH192G12 | 133181 | 4  | 12 |
| AC238387 | RH192P22 | 117817 | 10 | 12 |
| AC231673 | RH193D01 | 116204 | 1  | 11 |
| AC238388 | RH193J02 | 85853  | 8  | 5  |
| AC237897 | RH193K01 | 158987 | 11 | 0  |
| AC236640 | RH193L05 | 140321 | 27 | 0  |
| AC238389 | RH193M15 | 132152 | 10 | 5  |
| AC236641 | RH193O04 | 128152 | 21 | 5  |
| AC238390 | RH193O24 | 156653 | 8  | 5  |
| AC238391 | RH194A18 | 143682 | 11 | 5  |
| AC234596 | RH194J03 | 132986 | 17 | 1  |
| AC236642 | RH194L01 | 135411 | 23 | 1  |
| AC209520 | RH194M18 | 136309 | 5  | 6  |
| AC235973 | RH194N01 | 184228 | 18 | 6  |
| AC238392 | RH194O19 | 144468 | 12 | 5  |
| AC234561 | RH195B06 | 147845 | 21 | 1  |
| AC240130 | RH195B16 | 130881 | 11 | 12 |
| AC240061 | RH195B21 | 191856 | 17 | 10 |
| AC232117 | RH195E14 | 163873 | 14 | 1  |
| AC238393 | RH195G24 | 130559 | 4  | 5  |
| AC235974 | RH195H05 | 133527 | 27 | 6  |
| AC232118 | RH195I04 | 201680 | 19 | 1  |
| AC238394 | RH195I08 | 132809 | 19 | 1  |
| AC240062 | RH195I15 | 173634 | 12 | 7  |
| AC231674 | RH195J04 | 142640 | 1  | 11 |
| AC240063 | RH195J15 | 121077 | 8  | 9  |

|          |          |        |    |   |
|----------|----------|--------|----|---|
| AC236643 | RH195K14 | 137014 | 12 | 5 |
| AC232808 | RH195K24 | 168530 | 26 | 6 |
| AC235975 | RH195M17 | 140207 | 9  | 6 |
| AC237898 | RH195O01 | 114057 | 6  | 0 |
| AC238395 | RH196B14 | 154111 | 11 | 1 |
| AC238396 | RH196D19 | 135747 | 5  | 0 |
| AC238397 | RH196E02 | 144542 | 13 | 5 |
| AC238398 | RH196E12 | 144350 | 4  | 5 |
| AC238399 | RH196F10 | 141308 | 6  | 5 |
| AC232710 | RH196G04 | 162095 | 17 | 6 |
| AC236644 | RH196H13 | 160662 | 25 | 5 |
| AC235660 | RH196J08 | 174813 | 7  | 9 |
| AC240064 | RH196L18 | 143829 | 15 | 0 |
| AC238400 | RH197C19 | 131909 | 8  | 1 |
| JF317596 | RH197G21 | 195361 | 16 | 6 |
| AC236645 | RH197J01 | 149794 | 13 | 5 |
| AC234597 | RH197J09 | 141841 | 19 | 1 |
| AC217735 | RH197K20 | 171955 | 13 | 1 |
| AC219015 | RH197N21 | 163447 | 15 | 6 |
| AC236646 | RH197P05 | 125069 | 8  | 1 |
| AC217145 | RH198A04 | 140443 | 19 | 6 |
| AC233580 | RH198A12 | 158592 | 28 | 6 |
| AC235976 | RH198B20 | 171039 | 33 | 6 |
| AC238401 | RH198D19 | 151160 | 15 | 1 |
| AC235661 | RH198G15 | 152276 | 8  | 9 |
| HQ896311 | RH198H19 | 136416 | 1  | 0 |
| AC233536 | RH198J18 | 132077 | 11 | 1 |
| AC238402 | RH198K10 | 142851 | 12 | 5 |
| AC238403 | RH198L17 | 160415 | 7  | 5 |
| AC237900 | RH198L23 | 167586 | 27 | 0 |
| AC233537 | RH199A09 | 148294 | 12 | 5 |
| AC243406 | RH199B23 | 82054  | 45 | 5 |
| AC232119 | RH199E21 | 128935 | 16 | 5 |
| AC233538 | RH199E23 | 155407 | 14 | 5 |
| AC240065 | RH199H05 | 135304 | 5  | 9 |
| AC238404 | RH199H21 | 136024 | 7  | 1 |
| AC238405 | RH199J10 | 30401  | 2  | 5 |
| AC232813 | RH199K09 | 155610 | 30 | 6 |
| AC232120 | RH199K20 | 166439 | 14 | 1 |
| AC238406 | RH199M03 | 55959  | 4  | 5 |
| AC236647 | RH199N09 | 148700 | 21 | 1 |
| AC236648 | RH199O13 | 130236 | 18 | 1 |
| AC240131 | RH199P24 | 107911 | 9  | 1 |

|          |          |        |    |    |
|----------|----------|--------|----|----|
| AC235695 | RH200E03 | 159297 | 13 | 6  |
| AC240066 | RH200E19 | 175455 | 20 | 10 |
| AC240067 | RH200E20 | 153701 | 8  | 7  |
| AC235977 | RH200F13 | 151368 | 12 | 6  |
| AC238407 | RH200I12 | 153845 | 12 | 5  |
| AC217103 | RH200K19 | 158032 | 8  | 6  |
| AC240343 | RH200P15 | 149532 | 1  | 8  |
| AC238408 | RH201A02 | 145943 | 17 | 5  |
| AC238409 | RH201A13 | 139664 | 5  | 5  |
| AC217802 | RH201A18 | 165830 | 14 | 6  |
| AC234563 | RH201B24 | 164170 | 21 | 5  |
| AC238410 | RH201C20 | 143573 | 13 | 5  |
| AC236850 | RH201D07 | 189967 | 25 | 6  |
| AC232121 | RH201F12 | 77584  | 75 | 1  |
| AC236851 | RH201G10 | 149520 | 20 | 6  |
| AC236649 | RH201G17 | 129815 | 16 | 1  |
| AC238411 | RH201H03 | 186966 | 20 | 5  |
| AC236650 | RH201H08 | 163545 | 13 | 1  |
| HQ896310 | RH201H22 | 211591 | 1  | 0  |
| AC233640 | RH201K05 | 160147 | 24 | 4  |
| AC240068 | RH201L15 | 133022 | 7  | 0  |
| AC243052 | RH201N04 |        |    |    |
| AC236651 | RH201O06 | 140568 | 18 | 5  |
| AC234828 | RH201O11 | 142476 | 11 | 6  |
| AC243053 | RH202F21 |        |    |    |
| AC240069 | RH202G21 | 162348 | 22 | 11 |
| AC238412 | RH202H24 | 139301 | 9  | 5  |
| AC236652 | RH202I20 | 155254 | 23 | 5  |
| AC240070 | RH202J02 | 139611 | 18 | 7  |
| AC236653 | RH202M11 | 134796 | 13 | 1  |
| AC240071 | RH202M15 | 132590 | 42 | 11 |
| AC238413 | RH202N02 | 143683 | 13 | 5  |
| AC232122 | RH203D07 | 134457 | 13 | 5  |
| AC238414 | RH203D20 | 143836 | 13 | 5  |
| AC209526 | RH203E21 | 193156 | 11 | 1  |
| AC232123 | RH203H13 | 153330 | 13 | 5  |
| AC238415 | RH203I22 | 143770 | 6  | 5  |
| AC243407 | RH203J04 | 194944 | 9  | 5  |
| AC232124 | RH203J16 | 141241 | 13 | 1  |
| AC232125 | RH203K07 | 165517 | 19 | 5  |
| AC233539 | RH203L23 | 123824 | 37 | 5  |
| AC238416 | RH203M15 | 158911 | 7  | 5  |
| AC238417 | RH204A02 | 143129 | 10 | 5  |



|          |          |        |    |    |
|----------|----------|--------|----|----|
| AC235978 | RH204A17 | 165818 | 17 | 6  |
| AC240072 | RH204B22 | 93818  | 40 | 8  |
| AC238418 | RH204E05 | 128122 | 14 | 5  |
| AC236654 | RH204E19 | 153736 | 7  | 1  |
| AC218090 | RH204G08 | 131164 | 16 | 6  |
| AC232126 | RH204G09 | 141532 | 12 | 5  |
| AC240073 | RH204G21 | 155680 | 23 | 11 |
| AC232127 | RH204H15 | 130262 | 12 | 5  |
| AC237901 | RH204H17 | 89134  | 9  | 0  |
| AC239340 | RH204J10 | 96418  | 18 | 9  |
| AC217736 | RH204M15 | 166966 | 17 | 1  |

**Supplementary Table 12. Kmer counts in RH Illumina datasets.**

|    | RH total   | RNAseq selected | RH specific | DM total   |
|----|------------|-----------------|-------------|------------|
| 1  | 8541574293 | 37796962        | 3982281929  | 4355472029 |
| 2  | 975874984  | 15743270        | 815671370   | 536312390  |
| 3  | 359191824  | 8105544         | 249143043   | 188088036  |
| 4  | 203224196  | 5201664         | 119277676   | 105387412  |
| 5  | 142444400  | 3847845         | 73731445    | 70356700   |
| 6  | 113764548  | 3153966         | 54454746    | 56176644   |
| 7  | 99464057   | 2814819         | 46026820    | 46921483   |
| 8  | 92873176   | 2672568         | 42908864    | 41920712   |
| 9  | 90853182   | 2637621         | 42706359    | 38369430   |
| 10 | 91941670   | 2640510         | 44342840    | 36577500   |
| 11 | 95165114   | 2673979         | 47153733    | 36084840   |
| 12 | 99825096   | 2690928         | 50574000    | 37123248   |
| 13 | 105780311  | 2731859         | 54653404    | 39850135   |
| 14 | 112826994  | 2775206         | 59203046    | 44435650   |
| 15 | 120467310  | 2831970         | 63967245    | 51290970   |
| 16 | 128376368  | 2907360         | 68671936    | 60781408   |
| 17 | 136758149  | 3051687         | 73727079    | 72999020   |
| 18 | 145459854  | 3231342         | 78958566    | 88131186   |
| 19 | 154625648  | 3472383         | 84218336    | 106344615  |
| 20 | 163499540  | 3758360         | 89224940    | 127709540  |
| 21 | 172769499  | 4126311         | 94409427    | 152154135  |
| 22 | 182061066  | 4583898         | 99702900    | 179350908  |
| 23 | 191589931  | 5117845         | 104870961   | 209402810  |
| 24 | 201209808  | 5727720         | 110118288   | 241746504  |
| 25 | 211517700  | 6383775         | 115715250   | 275990950  |
| 26 | 221532896  | 7085728         | 121247048   | 312208650  |
| 27 | 232061247  | 7923690         | 127038483   | 349761159  |
| 28 | 243058788  | 8829828         | 132901104   | 388332364  |
| 29 | 254030169  | 9737446         | 138777383   | 426835224  |
| 30 | 265370820  | 10834680        | 144694950   | 465898350  |
| 31 | 277340880  | 11971735        | 151000659   | 503826787  |
| 32 | 289604128  | 13172160        | 157677984   | 540273056  |
| 33 | 301994187  | 14439942        | 164335644   | 575049717  |
| 34 | 314592582  | 15721566        | 170902428   | 606665706  |
| 35 | 327247655  | 17106705        | 177820930   | 634617165  |
| 36 | 340464996  | 18668304        | 184821768   | 658183176  |
| 37 | 353433953  | 20074017        | 191706324   | 675689930  |
| 38 | 366221238  | 21644002        | 198343774   | 688367948  |
| 39 | 379515942  | 23248485        | 205398882   | 694583214  |
| 40 | 391912240  | 24831760        | 211911320   | 694997520  |
| 41 | 404979140  | 26614125        | 218845618   | 688774539  |

|    |           |          |           |           |
|----|-----------|----------|-----------|-----------|
| 42 | 416858652 | 28236894 | 225131172 | 676647006 |
| 43 | 428715891 | 29877131 | 231429010 | 659636082 |
| 44 | 440382228 | 31613340 | 237157536 | 637498796 |
| 45 | 451515150 | 33305625 | 242704485 | 610676640 |
| 46 | 461391684 | 34982770 | 247889998 | 580824796 |
| 47 | 471374468 | 36598853 | 252846370 | 548683640 |
| 48 | 480674688 | 38200272 | 257321040 | 514400928 |
| 49 | 489104084 | 39855081 | 261365461 | 479282181 |
| 50 | 496878700 | 41248750 | 264858250 | 443659200 |
| 51 | 503920749 | 42592395 | 268213794 | 408463437 |
| 52 | 510335280 | 43999592 | 270740080 | 374206560 |
| 53 | 515037093 | 45371604 | 272560662 | 341825726 |
| 54 | 519378858 | 46531854 | 273751488 | 310701798 |
| 55 | 522721265 | 47607010 | 274717795 | 281739150 |
| 56 | 525706328 | 48609512 | 274977528 | 254785104 |
| 57 | 526825920 | 49462776 | 274660770 | 230131572 |
| 58 | 528227808 | 50467192 | 274017056 | 207998962 |
| 59 | 527510681 | 51126155 | 272229658 | 187645665 |
| 60 | 526491780 | 51783300 | 270034920 | 169540320 |
| 61 | 524972649 | 52314149 | 267397160 | 153744278 |
| 62 | 522069388 | 52847746 | 264111878 | 139568262 |
| 63 | 518921991 | 53145162 | 260557605 | 127194543 |
| 64 | 514874752 | 53667776 | 256311744 | 116539456 |
| 65 | 510000790 | 53822535 | 251764500 | 107267680 |
| 66 | 504691638 | 54030504 | 246891282 | 99109560  |
| 67 | 498968028 | 54146184 | 241800186 | 92280909  |
| 68 | 492257304 | 54061972 | 236138636 | 86518576  |
| 69 | 485430456 | 54203088 | 230050209 | 81728430  |
| 70 | 478178120 | 54294800 | 223914950 | 77465430  |
| 71 | 469670254 | 54032704 | 217256308 | 73982355  |
| 72 | 461795976 | 54096696 | 210528792 | 71059896  |
| 73 | 453305691 | 53910792 | 203930537 | 69002447  |
| 74 | 444566322 | 53856090 | 196789088 | 66929892  |
| 75 | 436513050 | 54024525 | 189992100 | 65336175  |
| 76 | 427779680 | 53769696 | 183009368 | 64086544  |
| 77 | 418999042 | 53758166 | 175729323 | 63096033  |
| 78 | 410100834 | 53744340 | 168593256 | 62141352  |
| 79 | 401762321 | 53745280 | 161761190 | 61163064  |
| 80 | 393859200 | 53806240 | 154917680 | 60577520  |
| 81 | 385750755 | 54015093 | 148434282 | 59904360  |
| 82 | 377845176 | 53983634 | 141782100 | 59189814  |
| 83 | 370327989 | 54377284 | 135588883 | 58592937  |
| 84 | 363154008 | 54568248 | 129501036 | 57921024  |

|     |           |          |           |          |
|-----|-----------|----------|-----------|----------|
| 85  | 356097810 | 54848035 | 123842110 | 57157655 |
| 86  | 349422128 | 55229802 | 118000084 | 56560394 |
| 87  | 343413708 | 55554633 | 112600533 | 55768305 |
| 88  | 337450960 | 56039016 | 107491384 | 54814144 |
| 89  | 331734328 | 56442376 | 102545355 | 53866805 |
| 90  | 326865510 | 56973780 | 98168580  | 52899120 |
| 91  | 322543585 | 57605275 | 93941666  | 51787736 |
| 92  | 317717676 | 57890540 | 89884644  | 50847848 |
| 93  | 314485824 | 58663191 | 86324646  | 49726914 |
| 94  | 310937148 | 59263616 | 82996454  | 48629490 |
| 95  | 307478995 | 59947090 | 79628145  | 47410225 |
| 96  | 305006592 | 60629568 | 76806912  | 46032672 |
| 97  | 302555901 | 61473556 | 74138555  | 44863276 |
| 98  | 300948396 | 62523314 | 71567636  | 43678502 |
| 99  | 299068605 | 63092304 | 69520671  | 42360912 |
| 100 | 297285700 | 63816200 | 67481500  | 41247400 |
| 101 | 295645483 | 64646262 | 65785340  | 40062761 |
| 102 | 294544074 | 65428308 | 64316916  | 38992356 |
| 103 | 293295590 | 66179457 | 62841124  | 37768246 |
| 104 | 292850376 | 67057536 | 61668984  | 36643880 |
| 105 | 291751950 | 67788735 | 60375735  | 35564445 |
| 106 | 290802308 | 68457026 | 59455718  | 34528016 |
| 107 | 290399284 | 69092682 | 58547618  | 33565151 |
| 108 | 289791972 | 69823188 | 57507084  | 32744628 |
| 109 | 289086094 | 70466756 | 56718477  | 31799551 |
| 110 | 288117280 | 70816240 | 55975370  | 31004490 |
| 111 | 287711556 | 71717433 | 55284438  | 30311991 |
| 112 | 286981744 | 72342256 | 54587568  | 29562960 |
| 113 | 285881299 | 72584194 | 54003717  | 28861217 |
| 114 | 285122550 | 72932640 | 53571564  | 28264134 |
| 115 | 284346930 | 73418760 | 53094925  | 27712010 |
| 116 | 283201820 | 73814976 | 52519812  | 27241672 |
| 117 | 282107709 | 74028591 | 52124436  | 26678106 |
| 118 | 281115766 | 74312860 | 51681404  | 26286742 |
| 119 | 279952498 | 74357388 | 51361233  | 25964491 |
| 120 | 278309640 | 74398560 | 50929080  | 25663080 |
| 121 | 276535941 | 74566492 | 50168173  | 25247860 |
| 122 | 274832938 | 74323498 | 50002432  | 24969862 |
| 123 | 272924700 | 74268384 | 49237146  | 24605535 |
| 124 | 271315348 | 74205444 | 48864184  | 24345416 |
| 125 | 268934750 | 73827750 | 48276625  | 24191125 |
| 126 | 266171976 | 73571778 | 47574954  | 23908752 |
| 127 | 264227945 | 73474707 | 47074455  | 23615269 |

|     |           |          |          |          |
|-----|-----------|----------|----------|----------|
| 128 | 261662592 | 73000448 | 46513024 | 23454080 |
| 129 | 259248333 | 72770319 | 46144977 | 23157435 |
| 130 | 256199060 | 72025980 | 45513780 | 22965800 |
| 131 | 253495218 | 71643376 | 44853221 | 22688545 |
| 132 | 250402548 | 70970988 | 44375496 | 22500588 |
| 133 | 247406201 | 70648669 | 43662969 | 22323119 |
| 134 | 244188870 | 69600806 | 43017886 | 22028126 |
| 135 | 240416235 | 68684760 | 42351795 | 21983130 |
| 136 | 237049088 | 67994968 | 41607432 | 21545120 |
| 137 | 233745427 | 67130000 | 40902994 | 21481600 |
| 138 | 230135424 | 66241242 | 40185324 | 21202182 |
| 139 | 226338426 | 65189054 | 39517283 | 21020136 |
| 140 | 222904780 | 64383620 | 38827740 | 20667220 |
| 141 | 218924355 | 63179421 | 38075358 | 20584308 |
| 142 | 215228832 | 62163908 | 37462582 | 20357972 |
| 143 | 211438370 | 61136790 | 36572250 | 19997406 |
| 144 | 207462960 | 60045408 | 35822160 | 19875888 |
| 145 | 203410495 | 58882035 | 35141040 | 19527295 |
| 146 | 199442570 | 57711902 | 34314526 | 19375222 |
| 147 | 195361236 | 56558103 | 33626544 | 19195113 |
| 148 | 191093160 | 55355996 | 32779336 | 18921208 |
| 149 | 187277206 | 54177890 | 31919525 | 18620977 |
| 150 | 182907750 | 52790850 | 31078800 | 18371250 |
| 151 | 178798194 | 51675522 | 30447489 | 18106410 |
| 152 | 174828424 | 50470080 | 29695176 | 17862584 |
| 153 | 171029673 | 49312665 | 29013390 | 17531505 |
| 154 | 166808642 | 47897696 | 28278404 | 17409546 |
| 155 | 162844240 | 46780705 | 27501650 | 17085805 |
| 156 | 159194100 | 45744972 | 26758992 | 17018352 |
| 157 | 155129345 | 44551576 | 26163265 | 16684233 |
| 158 | 150774976 | 43170814 | 25413352 | 16477188 |
| 159 | 147181848 | 42225471 | 24595392 | 16261248 |
| 160 | 143107680 | 41007680 | 24113760 | 16172160 |
| 161 | 139504246 | 39865049 | 23245985 | 15934814 |
| 162 | 135565002 | 38633274 | 22587174 | 15796296 |
| 163 | 132123399 | 37615673 | 21838903 | 15494128 |
| 164 | 128395764 | 36445884 | 21273260 | 15361388 |
| 165 | 125148045 | 35543970 | 20534415 | 15177030 |
| 166 | 121547192 | 34402504 | 19885638 | 15131232 |
| 167 | 117786770 | 33109253 | 19183791 | 14976727 |
| 168 | 114639336 | 32183760 | 18583152 | 14729904 |
| 169 | 111138456 | 31066763 | 17968418 | 14580982 |
| 170 | 108231350 | 30129610 | 17459340 | 14577500 |

|     |           |          |          |          |
|-----|-----------|----------|----------|----------|
| 171 | 105231861 | 29235528 | 16809813 | 14370327 |
| 172 | 102604536 | 28378968 | 16313856 | 14267744 |
| 173 | 99584682  | 27468940 | 15711168 | 14142750 |
| 174 | 96621678  | 26547876 | 15251796 | 13983510 |
| 175 | 93946475  | 25731300 | 14706825 | 13874175 |
| 176 | 91257232  | 24735216 | 14196336 | 13764960 |
| 177 | 88672221  | 24048813 | 13704402 | 13653426 |
| 178 | 86220886  | 23165988 | 13163100 | 13450926 |
| 179 | 83929162  | 22436755 | 12845756 | 13459189 |
| 180 | 81447660  | 21646980 | 12387420 | 13412700 |
| 181 | 79458819  | 21046318 | 11939303 | 13180963 |
| 182 | 77238434  | 20322666 | 11636716 | 13091806 |
| 183 | 75345309  | 19736001 | 11201064 | 12978177 |
| 184 | 73314432  | 18958256 | 10812208 | 12837128 |
| 185 | 71384470  | 18398065 | 10317635 | 12713200 |
| 186 | 69608826  | 17688786 | 10113750 | 12726678 |
| 187 | 67904562  | 17226253 | 9767945  | 12589214 |
| 188 | 66241424  | 16632548 | 9482344  | 12513844 |
| 189 | 64576386  | 16100343 | 9221877  | 12513501 |
| 190 | 63129780  | 15679370 | 8959070  | 12264310 |
| 191 | 61769591  | 15151266 | 8714757  | 12243864 |
| 192 | 60073536  | 14570112 | 8369088  | 12017856 |
| 193 | 59008399  | 14228539 | 8064119  | 11995915 |
| 194 | 57722566  | 13772642 | 7875818  | 11960876 |
| 195 | 56460105  | 13342485 | 7599735  | 11843325 |
| 196 | 55335112  | 12924240 | 7471520  | 11713156 |
| 197 | 54278425  | 12507136 | 7270876  | 11594435 |
| 198 | 53450694  | 12225510 | 7044444  | 11507166 |
| 199 | 52220784  | 11856022 | 6835451  | 11421406 |
| 200 | 51345800  | 11484200 | 6680200  | 11346800 |
| 201 | 50579841  | 11159520 | 6635010  | 11156304 |
| 202 | 49717048  | 10878912 | 6391280  | 11151410 |
| 203 | 48958322  | 10618524 | 6287519  | 11062485 |
| 204 | 48307200  | 10365648 | 6069612  | 10850556 |
| 205 | 47416910  | 10018350 | 5973495  | 10828920 |
| 206 | 46891162  | 9769756  | 5833508  | 10763294 |
| 207 | 46356822  | 9655308  | 5735556  | 10650150 |
| 208 | 45618768  | 9360208  | 5673200  | 10538320 |
| 209 | 44957781  | 9117834  | 5442151  | 10472781 |
| 210 | 44510970  | 8999130  | 5389440  | 10472490 |
| 211 | 43879771  | 8818323  | 5333447  | 10341532 |
| 212 | 43538864  | 8729100  | 5291520  | 10264828 |
| 213 | 43331868  | 8573889  | 5208276  | 10162443 |

|     |          |         |         |          |
|-----|----------|---------|---------|----------|
| 214 | 42706482 | 8375960 | 5078434 | 10118990 |
| 215 | 42230515 | 8177525 | 5067765 | 10053830 |
| 216 | 41756472 | 8039736 | 4965624 | 9928656  |
| 217 | 41394920 | 7919632 | 4934580 | 9933826  |
| 218 | 40975716 | 7816826 | 4763736 | 9711246  |
| 219 | 40719108 | 7745592 | 4724925 | 9671040  |
| 220 | 40358780 | 7611780 | 4668180 | 9718060  |
| 221 | 40011829 | 7513116 | 4650503 | 9571952  |
| 222 | 39726456 | 7414356 | 4564320 | 9596394  |
| 223 | 39309994 | 7310163 | 4530468 | 9321623  |
| 224 | 38984960 | 7116928 | 4482912 | 9376640  |
| 225 | 38666700 | 7062525 | 4405500 | 9302175  |
| 226 | 38515372 | 6986790 | 4350500 | 9307358  |
| 227 | 38232248 | 6973440 | 4313908 | 9151732  |
| 228 | 37910700 | 6918204 | 4201812 | 9047952  |
| 229 | 37663401 | 6846413 | 4201005 | 9072980  |
| 230 | 37391100 | 6798340 | 4106650 | 8960340  |
| 231 | 37113615 | 6754209 | 4114803 | 8882412  |
| 232 | 36731168 | 6647728 | 3993184 | 8874464  |
| 233 | 36542089 | 6616501 | 3919526 | 8917143  |
| 234 | 36155808 | 6388668 | 3929562 | 8732178  |
| 235 | 36092475 | 6409860 | 3899825 | 8648235  |
| 236 | 35738660 | 6289400 | 3822492 | 8661436  |
| 237 | 35508525 | 6310599 | 3784416 | 8623956  |
| 238 | 35198534 | 6218702 | 3709468 | 8571332  |
| 239 | 34963071 | 6150665 | 3688487 | 8511029  |
| 240 | 34458480 | 6105840 | 3655200 | 8414160  |
| 241 | 34505175 | 6164539 | 3631388 | 8393548  |
| 242 | 34034154 | 6090656 | 3529812 | 8389414  |
| 243 | 33751728 | 6007203 | 3462507 | 8274150  |
| 244 | 33820352 | 6033144 | 3535072 | 8231828  |
| 245 | 33365080 | 5924835 | 3445190 | 8152375  |
| 246 | 33186138 | 5976816 | 3402672 | 8166708  |
| 247 | 33038473 | 5965050 | 3389087 | 8158163  |
| 248 | 32702024 | 5907360 | 3315760 | 8027016  |
| 249 | 32617506 | 5809668 | 3384906 | 8022531  |
| 250 | 32381000 | 5855500 | 3306000 | 7934000  |

---

**Supplementary Table 13. Genes with premature stops**

| Premature Stop Code | Category                            | Gene in DM            | Transcript in DM      | Chromosome | RNA-seq Support in DM | RNA-seq support in RH | Functional annotation                                                                                                                                                  |
|---------------------|-------------------------------------|-----------------------|-----------------------|------------|-----------------------|-----------------------|------------------------------------------------------------------------------------------------------------------------------------------------------------------------|
| 1                   | Heterozygous PS in RH, shared by DM | PGSC0003DMG40000 0113 | PGSC0003DMT4000 00335 | chr09      | NO                    | NO                    |                                                                                                                                                                        |
| 2                   | Heterozygous PS in RH, shared by DM | PGSC0003DMG40000 0339 | PGSC0003DMT4000 00899 | chr07      | NO                    | NO                    |                                                                                                                                                                        |
| 3                   | Heterozygous PS in RH, shared by DM | PGSC0003DMG40000 0341 | PGSC0003DMT4000 00908 | chr01      | yes                   | NO                    |                                                                                                                                                                        |
| 4                   | Heterozygous PS in RH, shared by DM | PGSC0003DMG40000 0348 | PGSC0003DMT4000 00930 | chr03      | yes                   | yes                   |                                                                                                                                                                        |
| 5                   | Heterozygous PS in RH, shared by DM | PGSC0003DMG40000 0387 | PGSC0003DMT4000 01035 | chr09      | yes                   | yes                   | GO:0004672; protein kinase activity; Molecular Function GO:0005524; ATP binding; Molecular Function GO:0006468; protein amino acid phosphorylation; Biological Process |
| 6                   | Heterozygous PS in RH, shared by DM | PGSC0003DMG40000 0408 | PGSC0003DMT4000 01076 | chr01      | NO                    | NO                    |                                                                                                                                                                        |
| 7                   | Heterozygous PS in RH, shared by DM | PGSC0003DMG40000 0421 | PGSC0003DMT4000 01109 | chr12      | NO                    | NO                    |                                                                                                                                                                        |
| 8                   | Heterozygous PS in RH, shared by DM | PGSC0003DMG40000 0491 | PGSC0003DMT4000 01292 | chr11      | yes                   | NO                    | GO:0004553; hydrolase activity, hydrolyzing O-glycosyl compounds; Molecular Function GO:0005975; carbohydrate metabolic process; Biological Process                    |
| 9                   | Heterozygous PS in RH, shared by DM | PGSC0003DMG40200 0515 | PGSC0003DMT4000 01383 | chr01      | yes                   | NO                    |                                                                                                                                                                        |



|    |                                           |                          |                          |       |     |     |                                                                                                                                                                                                                               |
|----|-------------------------------------------|--------------------------|--------------------------|-------|-----|-----|-------------------------------------------------------------------------------------------------------------------------------------------------------------------------------------------------------------------------------|
| 10 | Heterozygous<br>PS in RH,<br>shared by DM | PGSC0003DMG40000<br>0690 | PGSC0003DMT4000<br>01836 | chr04 | yes | yes |                                                                                                                                                                                                                               |
| 11 | Heterozygous<br>PS in RH,<br>shared by DM | PGSC0003DMG40000<br>0711 | PGSC0003DMT4000<br>01888 | chr06 | NO  | NO  |                                                                                                                                                                                                                               |
| 12 | Heterozygous<br>PS in RH,<br>shared by DM | PGSC0003DMG40000<br>0724 | PGSC0003DMT4000<br>01912 | chr01 | NO  | NO  |                                                                                                                                                                                                                               |
| 13 | Heterozygous<br>PS in RH,<br>shared by DM | PGSC0003DMG40000<br>0728 | PGSC0003DMT4000<br>01921 | chr09 | NO  | NO  |                                                                                                                                                                                                                               |
| 14 | Heterozygous<br>PS in RH,<br>shared by DM | PGSC0003DMG40000<br>0729 | PGSC0003DMT4000<br>01923 | chr01 | yes | NO  |                                                                                                                                                                                                                               |
| 15 | Heterozygous<br>PS in RH,<br>shared by DM | PGSC0003DMG40000<br>0830 | PGSC0003DMT4000<br>02168 | chr09 | NO  | NO  | GO:0003676; nucleic acid binding;<br>Molecular Function                                                                                                                                                                       |
| 16 | Heterozygous<br>PS in RH,<br>shared by DM | PGSC0003DMG40000<br>1052 | PGSC0003DMT4000<br>02726 | chr12 | yes | NO  | GO:0016747; transferase activity,<br>transferring acyl groups other than amino-<br>acyl groups; Molecular Function                                                                                                            |
| 17 | Heterozygous<br>PS in RH,<br>shared by DM | PGSC0003DMG40000<br>1191 | PGSC0003DMT4000<br>03013 | chr04 | NO  | NO  |                                                                                                                                                                                                                               |
| 18 | Heterozygous<br>PS in RH,<br>shared by DM | PGSC0003DMG40000<br>1257 | PGSC0003DMT4000<br>03176 | chr06 | yes | yes | GO:0004497; monooxygenase activity;<br>Molecular Function GO:0005506; iron ion<br>binding; Molecular Function<br>GO:0009055; electron carrier activity;<br>Molecular Function GO:0020037; heme<br>binding; Molecular Function |
| 19 | Heterozygous<br>PS in RH,<br>shared by DM | PGSC0003DMG40000<br>1290 | PGSC0003DMT4000<br>03257 |       |     |     |                                                                                                                                                                                                                               |
| 20 | Heterozygous<br>PS in RH,<br>shared by DM | PGSC0003DMG40000<br>1294 | PGSC0003DMT4000<br>03264 | chr03 | yes | NO  |                                                                                                                                                                                                                               |

|    |                                           |                          |                          |       |     |     |                                                                                             |
|----|-------------------------------------------|--------------------------|--------------------------|-------|-----|-----|---------------------------------------------------------------------------------------------|
| 21 | Heterozygous<br>PS in RH,<br>shared by DM | PGSC0003DMG40000<br>1386 | PGSC0003DMT4000<br>03515 | chr01 | yes | NO  |                                                                                             |
| 22 | Heterozygous<br>PS in RH,<br>shared by DM | PGSC0003DMG40000<br>1432 | PGSC0003DMT4000<br>03632 | chr11 | yes | yes |                                                                                             |
| 23 | Heterozygous<br>PS in RH,<br>shared by DM | PGSC0003DMG40000<br>1458 | PGSC0003DMT4000<br>03697 | chr06 | yes | NO  | GO:0045454; cell redox homeostasis;<br>Biological Process                                   |
| 24 | Heterozygous<br>PS in RH,<br>shared by DM | PGSC0003DMG40000<br>1475 | PGSC0003DMT4000<br>03744 | chr07 | yes | NO  | GO:0003677; DNA binding; Molecular<br>Function                                              |
| 25 | Heterozygous<br>PS in RH,<br>shared by DM | PGSC0003DMG40000<br>1503 | PGSC0003DMT4000<br>03795 | chr04 | NO  | NO  | GO:0005515; protein binding; Molecular<br>Function                                          |
| 26 | Heterozygous<br>PS in RH,<br>shared by DM | PGSC0003DMG40000<br>1606 | PGSC0003DMT4000<br>04068 | chr12 | yes | NO  | GO:0005524; ATP binding; Molecular<br>Function GO:0006915; apoptosis;<br>Biological Process |
| 27 | Heterozygous<br>PS in RH,<br>shared by DM | PGSC0003DMG40000<br>1711 | PGSC0003DMT4000<br>04314 | chr04 | NO  | NO  |                                                                                             |
| 28 | Heterozygous<br>PS in RH,<br>shared by DM | PGSC0003DMG40000<br>1781 | PGSC0003DMT4000<br>04466 | chr10 | NO  | NO  |                                                                                             |
| 29 | Heterozygous<br>PS in RH,<br>shared by DM | PGSC0003DMG40000<br>1887 | PGSC0003DMT4000<br>04767 | -     | yes | NO  |                                                                                             |
| 30 | Heterozygous<br>PS in RH,<br>shared by DM | PGSC0003DMG40000<br>1890 | PGSC0003DMT4000<br>04770 | -     | yes | NO  |                                                                                             |
| 31 | Heterozygous<br>PS in RH,<br>shared by DM | PGSC0003DMG40000<br>1900 | PGSC0003DMT4000<br>04785 | chr05 | yes | yes |                                                                                             |
| 32 | Heterozygous<br>PS in RH,<br>shared by DM | PGSC0003DMG40000<br>1967 | PGSC0003DMT4000<br>04973 | chr09 | yes | NO  |                                                                                             |

|    |                                           |                          |                          |       |     |     |                                                                                                             |
|----|-------------------------------------------|--------------------------|--------------------------|-------|-----|-----|-------------------------------------------------------------------------------------------------------------|
| 33 | Heterozygous<br>PS in RH,<br>shared by DM | PGSC0003DMG40000<br>2067 | PGSC0003DMT4000<br>05246 | -     | NO  | NO  |                                                                                                             |
| 34 | Heterozygous<br>PS in RH,<br>shared by DM | PGSC0003DMG40000<br>2154 | PGSC0003DMT4000<br>05513 | chr12 | NO  | NO  | GO:0003676; nucleic acid binding;<br>Molecular Function GO:0008270; zinc ion<br>binding; Molecular Function |
| 35 | Heterozygous<br>PS in RH,<br>shared by DM | PGSC0003DMG40000<br>2387 | PGSC0003DMT4000<br>06135 | chr06 | yes | NO  |                                                                                                             |
| 36 | Heterozygous<br>PS in RH,<br>shared by DM | PGSC0003DMG40000<br>2491 | PGSC0003DMT4000<br>06372 | chr07 | yes | NO  |                                                                                                             |
| 37 | Heterozygous<br>PS in RH,<br>shared by DM | PGSC0003DMG40000<br>2547 | PGSC0003DMT4000<br>06532 | chr08 | NO  | NO  |                                                                                                             |
| 38 | Heterozygous<br>PS in RH,<br>shared by DM | PGSC0003DMG40100<br>2553 | PGSC0003DMT4000<br>06564 | chr09 | yes | yes | GO:0016021; integral to membrane;<br>Cellular Component                                                     |
| 39 | Heterozygous<br>PS in RH,<br>shared by DM | PGSC0003DMG40000<br>2585 | PGSC0003DMT4000<br>06642 | chr06 | NO  | NO  |                                                                                                             |
| 40 | Heterozygous<br>PS in RH,<br>shared by DM | PGSC0003DMG40000<br>2608 | PGSC0003DMT4000<br>06709 | chr05 | NO  | NO  |                                                                                                             |
| 41 | Heterozygous<br>PS in RH,<br>shared by DM | PGSC0003DMG40000<br>2612 | PGSC0003DMT4000<br>06726 | chr11 | NO  | NO  |                                                                                                             |
| 42 | Heterozygous<br>PS in RH,<br>shared by DM | PGSC0003DMG40000<br>2641 | PGSC0003DMT4000<br>06812 | chr08 | NO  | NO  |                                                                                                             |
| 43 | Heterozygous<br>PS in RH,<br>shared by DM | PGSC0003DMG40000<br>2650 | PGSC0003DMT4000<br>06827 | chr12 | NO  | NO  |                                                                                                             |
| 44 | Heterozygous<br>PS in RH,<br>shared by DM | PGSC0003DMG40000<br>2808 | PGSC0003DMT4000<br>07294 | chr05 | yes | NO  |                                                                                                             |

|    |                                           |                          |                          |       |     |     |                                                                                             |
|----|-------------------------------------------|--------------------------|--------------------------|-------|-----|-----|---------------------------------------------------------------------------------------------|
| 45 | Heterozygous<br>PS in RH,<br>shared by DM | PGSC0003DMG40000<br>2818 | PGSC0003DMT4000<br>07319 | chr03 | NO  | NO  |                                                                                             |
| 46 | Heterozygous<br>PS in RH,<br>shared by DM | PGSC0003DMG40000<br>2833 | PGSC0003DMT4000<br>07370 | chr06 | yes | yes | GO:0005524; ATP binding; Molecular<br>Function GO:0006915; apoptosis;<br>Biological Process |
| 47 | Heterozygous<br>PS in RH,<br>shared by DM | PGSC0003DMG40100<br>2888 | PGSC0003DMT4000<br>07484 | chr01 | yes | NO  |                                                                                             |
| 48 | Heterozygous<br>PS in RH,<br>shared by DM | PGSC0003DMG40000<br>3109 | PGSC0003DMT4000<br>08044 | chr09 | NO  | NO  |                                                                                             |
| 49 | Heterozygous<br>PS in RH,<br>shared by DM | PGSC0003DMG40000<br>3485 | PGSC0003DMT4000<br>08946 | chr08 | NO  | NO  |                                                                                             |
| 50 | Heterozygous<br>PS in RH,<br>shared by DM | PGSC0003DMG40000<br>3588 | PGSC0003DMT4000<br>09242 | chr06 | NO  | NO  |                                                                                             |
| 51 | Heterozygous<br>PS in RH,<br>shared by DM | PGSC0003DMG40000<br>3596 | PGSC0003DMT4000<br>09269 | chr10 | NO  | NO  |                                                                                             |
| 52 | Heterozygous<br>PS in RH,<br>shared by DM | PGSC0003DMG40000<br>3621 | PGSC0003DMT4000<br>09319 | chr02 | yes | NO  | GO:0005634; nucleus; Cellular<br>Component                                                  |
| 53 | Heterozygous<br>PS in RH,<br>shared by DM | PGSC0003DMG40000<br>3810 | PGSC0003DMT4000<br>09741 | chr07 | yes | yes |                                                                                             |
| 54 | Heterozygous<br>PS in RH,<br>shared by DM | PGSC0003DMG40000<br>3817 | PGSC0003DMT4000<br>09752 | chr10 | NO  | NO  |                                                                                             |
| 55 | Heterozygous<br>PS in RH,<br>shared by DM | PGSC0003DMG40100<br>4079 | PGSC0003DMT4000<br>10443 | chr06 | yes | yes |                                                                                             |
| 56 | Heterozygous<br>PS in RH,<br>shared by DM | PGSC0003DMG40000<br>4182 | PGSC0003DMT4000<br>10721 | chr07 | NO  | NO  |                                                                                             |

|    |                                           |                          |                          |       |     |     |                                                            |
|----|-------------------------------------------|--------------------------|--------------------------|-------|-----|-----|------------------------------------------------------------|
| 57 | Heterozygous<br>PS in RH,<br>shared by DM | PGSC0003DMG40000<br>4235 | PGSC0003DMT4000<br>10827 | chr02 | yes | NO  |                                                            |
| 58 | Heterozygous<br>PS in RH,<br>shared by DM | PGSC0003DMG40100<br>4281 | PGSC0003DMT4000<br>10931 | chr01 | NO  | NO  |                                                            |
| 59 | Heterozygous<br>PS in RH,<br>shared by DM | PGSC0003DMG40200<br>4406 | PGSC0003DMT4000<br>11248 | chr07 | yes | NO  | GO:0008152; metabolic process;<br>Biological Process       |
| 60 | Heterozygous<br>PS in RH,<br>shared by DM | PGSC0003DMG40000<br>4408 | PGSC0003DMT4000<br>11255 | chr02 | yes | NO  | GO:0016491; oxidoreductase activity;<br>Molecular Function |
| 61 | Heterozygous<br>PS in RH,<br>shared by DM | PGSC0003DMG40000<br>4492 | PGSC0003DMT4000<br>11446 | chr10 | NO  | NO  |                                                            |
| 62 | Heterozygous<br>PS in RH,<br>shared by DM | PGSC0003DMG40000<br>4582 | PGSC0003DMT4000<br>11660 | chr03 | yes | NO  |                                                            |
| 63 | Heterozygous<br>PS in RH,<br>shared by DM | PGSC0003DMG40000<br>4723 | PGSC0003DMT4000<br>12041 | chr05 | yes | NO  |                                                            |
| 64 | Heterozygous<br>PS in RH,<br>shared by DM | PGSC0003DMG40200<br>4751 | PGSC0003DMT4000<br>12103 | chr05 | yes | NO  |                                                            |
| 65 | Heterozygous<br>PS in RH,<br>shared by DM | PGSC0003DMG40000<br>4792 | PGSC0003DMT4000<br>12219 | chr05 | NO  | NO  |                                                            |
| 66 | Heterozygous<br>PS in RH,<br>shared by DM | PGSC0003DMG40000<br>4842 | PGSC0003DMT4000<br>12359 | chr09 | yes | yes |                                                            |
| 67 | Heterozygous<br>PS in RH,<br>shared by DM | PGSC0003DMG40000<br>4843 | PGSC0003DMT4000<br>12361 | chr01 | yes | yes |                                                            |
| 68 | Heterozygous<br>PS in RH,<br>shared by DM | PGSC0003DMG40200<br>4862 | PGSC0003DMT4000<br>12418 | chr10 | yes | NO  |                                                            |

|    |                                           |                          |                          |       |     |     |                                                         |
|----|-------------------------------------------|--------------------------|--------------------------|-------|-----|-----|---------------------------------------------------------|
| 69 | Heterozygous<br>PS in RH,<br>shared by DM | PGSC0003DMG40100<br>4870 | PGSC0003DMT4000<br>12446 | chr03 | yes | NO  |                                                         |
| 70 | Heterozygous<br>PS in RH,<br>shared by DM | PGSC0003DMG40000<br>4956 | PGSC0003DMT4000<br>12718 | chr01 | NO  | NO  |                                                         |
| 71 | Heterozygous<br>PS in RH,<br>shared by DM | PGSC0003DMG40000<br>5056 | PGSC0003DMT4000<br>12976 | chr12 | NO  | NO  |                                                         |
| 72 | Heterozygous<br>PS in RH,<br>shared by DM | PGSC0003DMG40000<br>5108 | PGSC0003DMT4000<br>13090 | chr04 | yes | NO  |                                                         |
| 73 | Heterozygous<br>PS in RH,<br>shared by DM | PGSC0003DMG40000<br>5121 | PGSC0003DMT4000<br>13107 | chr04 | yes | NO  |                                                         |
| 74 | Heterozygous<br>PS in RH,<br>shared by DM | PGSC0003DMG40000<br>5128 | PGSC0003DMT4000<br>13130 | chr03 | yes | NO  | GO:0016021; integral to membrane;<br>Cellular Component |
| 75 | Heterozygous<br>PS in RH,<br>shared by DM | PGSC0003DMG40200<br>5139 | PGSC0003DMT4000<br>13159 |       |     |     |                                                         |
| 76 | Heterozygous<br>PS in RH,<br>shared by DM | PGSC0003DMG40000<br>5141 | PGSC0003DMT4000<br>13164 | chr05 | yes | yes | GO:0005525; GTP binding; Molecular<br>Function          |
| 77 | Heterozygous<br>PS in RH,<br>shared by DM | PGSC0003DMG40000<br>5149 | PGSC0003DMT4000<br>13180 | -     | NO  | NO  |                                                         |
| 78 | Heterozygous<br>PS in RH,<br>shared by DM | PGSC0003DMG40000<br>5186 | PGSC0003DMT4000<br>13292 | chr04 | yes | NO  |                                                         |
| 79 | Heterozygous<br>PS in RH,<br>shared by DM | PGSC0003DMG40000<br>5267 | PGSC0003DMT4000<br>13497 | chr08 | NO  | NO  |                                                         |
| 80 | Heterozygous<br>PS in RH,<br>shared by DM | PGSC0003DMG40000<br>5295 | PGSC0003DMT4000<br>13560 | -     | NO  | NO  |                                                         |

|    |                                           |                          |                          |       |     |     |                                                                                                                                                                 |
|----|-------------------------------------------|--------------------------|--------------------------|-------|-----|-----|-----------------------------------------------------------------------------------------------------------------------------------------------------------------|
| 81 | Heterozygous<br>PS in RH,<br>shared by DM | PGSC0003DMG40000<br>5393 | PGSC0003DMT4000<br>13773 | chr03 | NO  | NO  |                                                                                                                                                                 |
| 82 | Heterozygous<br>PS in RH,<br>shared by DM | PGSC0003DMG40000<br>5529 | PGSC0003DMT4000<br>14098 | chr09 | yes | NO  | GO:0004553; hydrolase activity,<br>hydrolyzing O-glycosyl compounds;<br>Molecular Function GO:0005975;<br>carbohydrate metabolic process;<br>Biological Process |
| 83 | Heterozygous<br>PS in RH,<br>shared by DM | PGSC0003DMG40000<br>5742 | PGSC0003DMT4000<br>14732 | chr04 | NO  | NO  |                                                                                                                                                                 |
| 84 | Heterozygous<br>PS in RH,<br>shared by DM | PGSC0003DMG40000<br>5830 | PGSC0003DMT4000<br>14940 | chr08 | NO  | NO  |                                                                                                                                                                 |
| 85 | Heterozygous<br>PS in RH,<br>shared by DM | PGSC0003DMG40000<br>5875 | PGSC0003DMT4000<br>15046 |       |     |     |                                                                                                                                                                 |
| 86 | Heterozygous<br>PS in RH,<br>shared by DM | PGSC0003DMG40000<br>5997 | PGSC0003DMT4000<br>15373 | chr07 | yes | NO  | GO:0047800; cysteamine dioxygenase<br>activity; Molecular Function<br>GO:0055114; oxidation reduction;<br>Biological Process                                    |
| 87 | Heterozygous<br>PS in RH,<br>shared by DM | PGSC0003DMG40000<br>6059 | PGSC0003DMT4000<br>15519 | chr12 | NO  | NO  |                                                                                                                                                                 |
| 88 | Heterozygous<br>PS in RH,<br>shared by DM | PGSC0003DMG40100<br>6099 | PGSC0003DMT4000<br>15627 | chr10 | yes | NO  |                                                                                                                                                                 |
| 89 | Heterozygous<br>PS in RH,<br>shared by DM | PGSC0003DMG40100<br>6284 | PGSC0003DMT4000<br>16072 | chr04 | NO  | NO  |                                                                                                                                                                 |
| 90 | Heterozygous<br>PS in RH,<br>shared by DM | PGSC0003DMG40000<br>6416 | PGSC0003DMT4000<br>16423 | chr05 | yes | NO  |                                                                                                                                                                 |
| 91 | Heterozygous<br>PS in RH,<br>shared by DM | PGSC0003DMG40000<br>6758 | PGSC0003DMT4000<br>17373 | chr04 | yes | yes |                                                                                                                                                                 |

|     |                                           |                          |                          |       |     |     |                                                                                                                                                                                                                                                                               |
|-----|-------------------------------------------|--------------------------|--------------------------|-------|-----|-----|-------------------------------------------------------------------------------------------------------------------------------------------------------------------------------------------------------------------------------------------------------------------------------|
| 92  | Heterozygous<br>PS in RH,<br>shared by DM | PGSC0003DMG40000<br>6769 | PGSC0003DMT4000<br>17408 | chr09 | NO  | NO  |                                                                                                                                                                                                                                                                               |
| 93  | Heterozygous<br>PS in RH,<br>shared by DM | PGSC0003DMG40000<br>6845 | PGSC0003DMT4000<br>17642 | chr01 | yes | NO  |                                                                                                                                                                                                                                                                               |
| 94  | Heterozygous<br>PS in RH,<br>shared by DM | PGSC0003DMG40000<br>6891 | PGSC0003DMT4000<br>17745 | chr07 | NO  | NO  |                                                                                                                                                                                                                                                                               |
| 95  | Heterozygous<br>PS in RH,<br>shared by DM | PGSC0003DMG40000<br>7073 | PGSC0003DMT4000<br>18218 | chr06 | NO  | NO  | GO:0006633; fatty acid biosynthetic process; Biological Process GO:0008415; acyltransferase activity; Molecular Function GO:0016020; membrane; Cellular Component GO:0016747; transferase activity, transferring acyl groups other than amino-acyl groups; Molecular Function |
| 96  | Heterozygous<br>PS in RH,<br>shared by DM | PGSC0003DMG40000<br>7112 | PGSC0003DMT4000<br>18308 | chr03 | yes | yes |                                                                                                                                                                                                                                                                               |
| 97  | Heterozygous<br>PS in RH,<br>shared by DM | PGSC0003DMG40000<br>7405 | PGSC0003DMT4000<br>19126 | chr07 | NO  | NO  |                                                                                                                                                                                                                                                                               |
| 98  | Heterozygous<br>PS in RH,<br>shared by DM | PGSC0003DMG40000<br>7523 | PGSC0003DMT4000<br>19465 | -     | yes | NO  | GO:0000287; magnesium ion binding; Molecular Function GO:0008152; metabolic process; Biological Process GO:0016829; lyase activity; Molecular Function                                                                                                                        |
| 99  | Heterozygous<br>PS in RH,<br>shared by DM | PGSC0003DMG40000<br>7526 | PGSC0003DMT4000<br>19468 | chr06 | yes | NO  |                                                                                                                                                                                                                                                                               |
| 100 | Heterozygous<br>PS in RH,<br>shared by DM | PGSC0003DMG40000<br>7590 | PGSC0003DMT4000<br>19639 | chr07 | NO  | NO  |                                                                                                                                                                                                                                                                               |
| 101 | Heterozygous<br>PS in RH,<br>shared by DM | PGSC0003DMG40200<br>7686 | PGSC0003DMT4000<br>19870 | chr04 | yes | NO  |                                                                                                                                                                                                                                                                               |



|     |                                           |                          |                          |       |     |    |                                                                                                             |
|-----|-------------------------------------------|--------------------------|--------------------------|-------|-----|----|-------------------------------------------------------------------------------------------------------------|
| 102 | Heterozygous<br>PS in RH,<br>shared by DM | PGSC0003DMG40000<br>7825 | PGSC0003DMT4000<br>20238 | chr07 | NO  | NO |                                                                                                             |
| 103 | Heterozygous<br>PS in RH,<br>shared by DM | PGSC0003DMG40000<br>7848 | PGSC0003DMT4000<br>20297 | chr06 | NO  | NO |                                                                                                             |
| 104 | Heterozygous<br>PS in RH,<br>shared by DM | PGSC0003DMG40000<br>7876 | PGSC0003DMT4000<br>20367 | chr10 | NO  | NO |                                                                                                             |
| 105 | Heterozygous<br>PS in RH,<br>shared by DM | PGSC0003DMG40000<br>7925 | PGSC0003DMT4000<br>20492 | chr07 | yes | NO | GO:0003676; nucleic acid binding;<br>Molecular Function                                                     |
| 106 | Heterozygous<br>PS in RH,<br>shared by DM | PGSC0003DMG40000<br>7994 | PGSC0003DMT4000<br>20635 |       |     |    |                                                                                                             |
| 107 | Heterozygous<br>PS in RH,<br>shared by DM | PGSC0003DMG40000<br>8176 | PGSC0003DMT4000<br>21111 | chr01 | NO  | NO |                                                                                                             |
| 108 | Heterozygous<br>PS in RH,<br>shared by DM | PGSC0003DMG40000<br>8323 | PGSC0003DMT4000<br>21449 | chr11 | NO  | NO |                                                                                                             |
| 109 | Heterozygous<br>PS in RH,<br>shared by DM | PGSC0003DMG40000<br>8507 | PGSC0003DMT4000<br>21933 | chr06 | NO  | NO |                                                                                                             |
| 110 | Heterozygous<br>PS in RH,<br>shared by DM | PGSC0003DMG40000<br>8582 | PGSC0003DMT4000<br>22121 | chr01 | yes | NO |                                                                                                             |
| 111 | Heterozygous<br>PS in RH,<br>shared by DM | PGSC0003DMG40000<br>8618 | PGSC0003DMT4000<br>22205 | chr01 | NO  | NO | GO:0003676; nucleic acid binding;<br>Molecular Function GO:0008270; zinc ion<br>binding; Molecular Function |
| 112 | Heterozygous<br>PS in RH,<br>shared by DM | PGSC0003DMG40000<br>8701 | PGSC0003DMT4000<br>22450 | chr11 | NO  | NO |                                                                                                             |
| 113 | Heterozygous<br>PS in RH,<br>shared by DM | PGSC0003DMG40000<br>8842 | PGSC0003DMT4000<br>22793 | chr03 | yes | NO | GO:0008270; zinc ion binding; Molecular<br>Function                                                         |

|     |                                           |                          |                          |       |     |     |                                                                                                                                                                                      |
|-----|-------------------------------------------|--------------------------|--------------------------|-------|-----|-----|--------------------------------------------------------------------------------------------------------------------------------------------------------------------------------------|
| 114 | Heterozygous<br>PS in RH,<br>shared by DM | PGSC0003DMG40000<br>8907 | PGSC0003DMT4000<br>23009 | chr03 | NO  | NO  |                                                                                                                                                                                      |
| 115 | Heterozygous<br>PS in RH,<br>shared by DM | PGSC0003DMG40100<br>8915 | PGSC0003DMT4000<br>23035 | -     | NO  | NO  |                                                                                                                                                                                      |
| 116 | Heterozygous<br>PS in RH,<br>shared by DM | PGSC0003DMG40000<br>8942 | PGSC0003DMT4000<br>23090 | chr08 | yes | NO  |                                                                                                                                                                                      |
| 117 | Heterozygous<br>PS in RH,<br>shared by DM | PGSC0003DMG40000<br>9066 | PGSC0003DMT4000<br>23412 | chr08 | yes | yes |                                                                                                                                                                                      |
| 118 | Heterozygous<br>PS in RH,<br>shared by DM | PGSC0003DMG40000<br>9146 | PGSC0003DMT4000<br>23625 | chr07 | yes | yes | GO:0003723; RNA binding; Molecular Function<br>GO:0003964; RNA-directed DNA polymerase activity; Molecular Function<br>GO:0006278; RNA-dependent DNA replication; Biological Process |
| 119 | Heterozygous<br>PS in RH,<br>shared by DM | PGSC0003DMG40200<br>9171 | PGSC0003DMT4000<br>23711 | chr02 | NO  | NO  |                                                                                                                                                                                      |
| 120 | Heterozygous<br>PS in RH,<br>shared by DM | PGSC0003DMG40000<br>9217 | PGSC0003DMT4000<br>23822 | chr07 | NO  | NO  | GO:0004252; serine-type endopeptidase activity; Molecular Function<br>GO:0006508; proteolysis; Biological Process                                                                    |
| 121 | Heterozygous<br>PS in RH,<br>shared by DM | PGSC0003DMG40000<br>9342 | PGSC0003DMT4000<br>24168 | chr03 | yes | NO  | GO:0005506; iron ion binding; Molecular Function<br>GO:0016226; iron-sulfur cluster assembly; Biological Process<br>GO:0051536; iron-sulfur cluster binding; Molecular Function      |

|     |                                           |                          |                          |       |     |     |                                                                                                                                                                                                                                                                                                                                                                                                                                                                                                                                                          |
|-----|-------------------------------------------|--------------------------|--------------------------|-------|-----|-----|----------------------------------------------------------------------------------------------------------------------------------------------------------------------------------------------------------------------------------------------------------------------------------------------------------------------------------------------------------------------------------------------------------------------------------------------------------------------------------------------------------------------------------------------------------|
| 122 | Heterozygous<br>PS in RH,<br>shared by DM | PGSC0003DMG40100<br>9603 | PGSC0003DMT4000<br>24843 | chr02 | yes | NO  | GO:0003824; catalytic activity; Molecular Function GO:0005524; ATP binding; Molecular Function GO:0006754; ATP biosynthetic process; Biological Process GO:0006812; cation transport; Biological Process GO:0008152; metabolic process; Biological Process GO:0015662; ATPase activity, coupled to transmembrane movement of ions, phosphorylative mechanism; Molecular Function GO:0016020; membrane; Cellular Component GO:0016820; hydrolase activity, acting on acid anhydrides, catalyzing transmembrane movement of substances; Molecular Function |
| 123 | Heterozygous<br>PS in RH,<br>shared by DM | PGSC0003DMG40000<br>9631 | PGSC0003DMT4000<br>24924 | chr04 | yes | NO  | GO:0006629; lipid metabolic process; Biological Process GO:0016788; hydrolase activity, acting on ester bonds; Molecular Function                                                                                                                                                                                                                                                                                                                                                                                                                        |
| 124 | Heterozygous<br>PS in RH,<br>shared by DM | PGSC0003DMG40000<br>9634 | PGSC0003DMT4000<br>24931 | chr11 | yes | yes | GO:0008152; metabolic process; Biological Process GO:0016491; oxidoreductase activity; Molecular Function                                                                                                                                                                                                                                                                                                                                                                                                                                                |
| 125 | Heterozygous<br>PS in RH,<br>shared by DM | PGSC0003DMG40000<br>9685 | PGSC0003DMT4000<br>25083 | chr06 | yes | NO  |                                                                                                                                                                                                                                                                                                                                                                                                                                                                                                                                                          |
| 126 | Heterozygous<br>PS in RH,<br>shared by DM | PGSC0003DMG40000<br>9703 | PGSC0003DMT4000<br>25113 | chr08 | yes | NO  | GO:0004672; protein kinase activity; Molecular Function GO:0005524; ATP binding; Molecular Function GO:0006468; protein amino acid phosphorylation; Biological Process                                                                                                                                                                                                                                                                                                                                                                                   |
| 127 | Heterozygous<br>PS in RH,<br>shared by DM | PGSC0003DMG40000<br>9715 | PGSC0003DMT4000<br>25139 | chr04 | NO  | NO  |                                                                                                                                                                                                                                                                                                                                                                                                                                                                                                                                                          |
| 128 | Heterozygous<br>PS in RH,<br>shared by DM | PGSC0003DMG40000<br>9852 | PGSC0003DMT4000<br>25511 | chr01 | yes | NO  |                                                                                                                                                                                                                                                                                                                                                                                                                                                                                                                                                          |

|     |                                           |                          |                          |       |     |     |                                                                    |
|-----|-------------------------------------------|--------------------------|--------------------------|-------|-----|-----|--------------------------------------------------------------------|
| 129 | Heterozygous<br>PS in RH,<br>shared by DM | PGSC0003DMG40000<br>9901 | PGSC0003DMT4000<br>25634 | chr06 | yes | yes |                                                                    |
| 130 | Heterozygous<br>PS in RH,<br>shared by DM | PGSC0003DMG40000<br>9908 | PGSC0003DMT4000<br>25655 | chr12 | NO  | NO  |                                                                    |
| 131 | Heterozygous<br>PS in RH,<br>shared by DM | PGSC0003DMG40000<br>9966 | PGSC0003DMT4000<br>25807 | chr10 | yes | NO  | GO:0003824; catalytic activity; Molecular<br>Function              |
| 132 | Heterozygous<br>PS in RH,<br>shared by DM | PGSC0003DMG40001<br>0041 | PGSC0003DMT4000<br>26022 | chr12 | yes | NO  | GO:0042318; penicillin biosynthetic<br>process; Biological Process |
| 133 | Heterozygous<br>PS in RH,<br>shared by DM | PGSC0003DMG40001<br>0042 | PGSC0003DMT4000<br>26026 | chr05 | NO  | NO  |                                                                    |
| 134 | Heterozygous<br>PS in RH,<br>shared by DM | PGSC0003DMG40001<br>0086 | PGSC0003DMT4000<br>26172 | chr09 | yes | NO  |                                                                    |
| 135 | Heterozygous<br>PS in RH,<br>shared by DM | PGSC0003DMG40001<br>0159 | PGSC0003DMT4000<br>26319 | chr04 | yes | NO  |                                                                    |
| 136 | Heterozygous<br>PS in RH,<br>shared by DM | PGSC0003DMG40001<br>0299 | PGSC0003DMT4000<br>26654 | chr09 | NO  | NO  |                                                                    |
| 137 | Heterozygous<br>PS in RH,<br>shared by DM | PGSC0003DMG40001<br>0321 | PGSC0003DMT4000<br>26708 | chr09 | yes | yes |                                                                    |
| 138 | Heterozygous<br>PS in RH,<br>shared by DM | PGSC0003DMG40101<br>0456 | PGSC0003DMT4000<br>27098 | chr06 | NO  | NO  |                                                                    |
| 139 | Heterozygous<br>PS in RH,<br>shared by DM | PGSC0003DMG40001<br>0493 | PGSC0003DMT4000<br>27205 | chr02 | yes | NO  |                                                                    |
| 140 | Heterozygous<br>PS in RH,<br>shared by DM | PGSC0003DMG40001<br>0801 | PGSC0003DMT4000<br>28010 | chr10 | yes | NO  |                                                                    |

|     |                                           |                          |                          |       |     |     |                                                                                                                                                                                                                                                                                            |
|-----|-------------------------------------------|--------------------------|--------------------------|-------|-----|-----|--------------------------------------------------------------------------------------------------------------------------------------------------------------------------------------------------------------------------------------------------------------------------------------------|
| 141 | Heterozygous<br>PS in RH,<br>shared by DM | PGSC0003DMG40001<br>0892 | PGSC0003DMT4000<br>28257 | chr07 | yes | NO  | GO:0006897; endocytosis; Biological<br>Process GO:0016020; membrane; Cellular<br>Component                                                                                                                                                                                                 |
| 142 | Heterozygous<br>PS in RH,<br>shared by DM | PGSC0003DMG40001<br>0895 | PGSC0003DMT4000<br>28264 | -     | yes | yes | GO:0005515; protein binding; Molecular<br>Function                                                                                                                                                                                                                                         |
| 143 | Heterozygous<br>PS in RH,<br>shared by DM | PGSC0003DMG40301<br>0943 | PGSC0003DMT4000<br>28400 | chr06 | NO  | NO  | GO:0005507; copper ion binding;<br>Molecular Function GO:0008131; amine<br>oxidase activity; Molecular Function<br>GO:0009308; amine metabolic process;<br>Biological Process GO:0048038; quinone<br>binding; Molecular Function<br>GO:0055114; oxidation reduction;<br>Biological Process |
| 144 | Heterozygous<br>PS in RH,<br>shared by DM | PGSC0003DMG40001<br>1057 | PGSC0003DMT4000<br>28724 | chr11 | yes | yes |                                                                                                                                                                                                                                                                                            |
| 145 | Heterozygous<br>PS in RH,<br>shared by DM | PGSC0003DMG40001<br>1065 | PGSC0003DMT4000<br>28752 | chr12 | yes | NO  | GO:0006855; multidrug transport;<br>Biological Process GO:0015238; drug<br>transporter activity; Molecular Function<br>GO:0015297; antiporter activity;<br>Molecular Function GO:0016020;<br>membrane; Cellular Component<br>GO:0055085; transmembrane transport;<br>Biological Process    |
| 146 | Heterozygous<br>PS in RH,<br>shared by DM | PGSC0003DMG40201<br>1400 | PGSC0003DMT4000<br>29658 | chr04 | NO  | NO  | GO:0016021; integral to membrane;<br>Cellular Component                                                                                                                                                                                                                                    |
| 147 | Heterozygous<br>PS in RH,<br>shared by DM | PGSC0003DMG40001<br>1472 | PGSC0003DMT4000<br>29849 | chr07 | yes | NO  |                                                                                                                                                                                                                                                                                            |
| 148 | Heterozygous<br>PS in RH,<br>shared by DM | PGSC0003DMG40001<br>1477 | PGSC0003DMT4000<br>29866 | chr08 | yes | NO  |                                                                                                                                                                                                                                                                                            |
| 149 | Heterozygous<br>PS in RH,<br>shared by DM | PGSC0003DMG40001<br>1503 | PGSC0003DMT4000<br>29964 | chr05 | yes | NO  | GO:0016787; hydrolase activity;<br>Molecular Function                                                                                                                                                                                                                                      |

|     |                                           |                          |                          |       |     |     |                                                                                                                                                                                                                                                                                                                                                                                                                                                                                                                                                                    |
|-----|-------------------------------------------|--------------------------|--------------------------|-------|-----|-----|--------------------------------------------------------------------------------------------------------------------------------------------------------------------------------------------------------------------------------------------------------------------------------------------------------------------------------------------------------------------------------------------------------------------------------------------------------------------------------------------------------------------------------------------------------------------|
| 150 | Heterozygous<br>PS in RH,<br>shared by DM | PGSC0003DMG40001<br>1508 | PGSC0003DMT4000<br>29984 | chr03 | yes | NO  |                                                                                                                                                                                                                                                                                                                                                                                                                                                                                                                                                                    |
| 151 | Heterozygous<br>PS in RH,<br>shared by DM | PGSC0003DMG40001<br>1513 | PGSC0003DMT4000<br>29999 | chr08 | yes | NO  |                                                                                                                                                                                                                                                                                                                                                                                                                                                                                                                                                                    |
| 152 | Heterozygous<br>PS in RH,<br>shared by DM | PGSC0003DMG40101<br>1522 | PGSC0003DMT4000<br>30027 | chr10 | yes | NO  | GO:0000166; nucleotide binding;<br>Molecular Function GO:0003676; nucleic<br>acid binding; Molecular Function<br>GO:0004812; aminoacyl-tRNA ligase<br>activity; Molecular Function<br>GO:0005524; ATP binding; Molecular<br>Function GO:0005737; cytoplasm;<br>Cellular Component GO:0006412;<br>translation; Biological Process<br>GO:0006418; tRNA aminoacylation for<br>protein translation; Biological Process<br>GO:0008152; metabolic process;<br>Biological Process GO:0016758;<br>transferase activity, transferring hexosyl<br>groups; Molecular Function |
| 153 | Heterozygous<br>PS in RH,<br>shared by DM | PGSC0003DMG40001<br>1670 | PGSC0003DMT4000<br>30473 | chr11 | NO  | NO  | GO:0008152; metabolic process;<br>Biological Process GO:0016758;<br>transferase activity, transferring hexosyl<br>groups; Molecular Function                                                                                                                                                                                                                                                                                                                                                                                                                       |
| 154 | Heterozygous<br>PS in RH,<br>shared by DM | PGSC0003DMG40201<br>1681 | PGSC0003DMT4000<br>30500 | chr06 | yes | yes |                                                                                                                                                                                                                                                                                                                                                                                                                                                                                                                                                                    |
| 155 | Heterozygous<br>PS in RH,<br>shared by DM | PGSC0003DMG40001<br>1835 | PGSC0003DMT4000<br>30892 | chr09 | NO  | NO  | GO:0016491; oxidoreductase activity;<br>Molecular Function                                                                                                                                                                                                                                                                                                                                                                                                                                                                                                         |
| 156 | Heterozygous<br>PS in RH,<br>shared by DM | PGSC0003DMG40001<br>1890 | PGSC0003DMT4000<br>31035 | chr10 | NO  | NO  | GO:0005618; cell wall; Cellular<br>Component GO:0030599; pectinesterase<br>activity; Molecular Function<br>GO:0042545; cell wall modification;<br>Biological Process                                                                                                                                                                                                                                                                                                                                                                                               |
| 157 | Heterozygous<br>PS in RH,<br>shared by DM | PGSC0003DMG40001<br>1977 | PGSC0003DMT4000<br>31252 | chr11 | NO  | NO  |                                                                                                                                                                                                                                                                                                                                                                                                                                                                                                                                                                    |

|     |                                           |                          |                          |       |     |     |                                                                                                                                                                                                                                                                                                                 |
|-----|-------------------------------------------|--------------------------|--------------------------|-------|-----|-----|-----------------------------------------------------------------------------------------------------------------------------------------------------------------------------------------------------------------------------------------------------------------------------------------------------------------|
| 158 | Heterozygous<br>PS in RH,<br>shared by DM | PGSC0003DMG40001<br>2028 | PGSC0003DMT4000<br>31379 | chr07 | yes | NO  | GO:0004252; serine-type endopeptidase activity; Molecular Function<br>GO:0006508; proteolysis; Biological Process                                                                                                                                                                                               |
| 159 | Heterozygous<br>PS in RH,<br>shared by DM | PGSC0003DMG40001<br>2042 | PGSC0003DMT4000<br>31413 | chr03 | yes | NO  |                                                                                                                                                                                                                                                                                                                 |
| 160 | Heterozygous<br>PS in RH,<br>shared by DM | PGSC0003DMG40001<br>2138 | PGSC0003DMT4000<br>31653 | chr04 | NO  | NO  |                                                                                                                                                                                                                                                                                                                 |
| 161 | Heterozygous<br>PS in RH,<br>shared by DM | PGSC0003DMG40001<br>2166 | PGSC0003DMT4000<br>31711 | chr09 | yes | yes | GO:0005515; protein binding; Molecular Function<br>GO:0006886; intracellular protein transport; Biological Process<br>GO:0016192; vesicle-mediated transport; Biological Process<br>GO:0030117; membrane coat; Cellular Component                                                                               |
| 162 | Heterozygous<br>PS in RH,<br>shared by DM | PGSC0003DMG40001<br>2284 | PGSC0003DMT4000<br>32020 | -     | NO  | NO  |                                                                                                                                                                                                                                                                                                                 |
| 163 | Heterozygous<br>PS in RH,<br>shared by DM | PGSC0003DMG40001<br>2371 | PGSC0003DMT4000<br>32198 | chr07 | yes | NO  |                                                                                                                                                                                                                                                                                                                 |
| 164 | Heterozygous<br>PS in RH,<br>shared by DM | PGSC0003DMG40001<br>2425 | PGSC0003DMT4000<br>32346 | chr06 | NO  | NO  |                                                                                                                                                                                                                                                                                                                 |
| 165 | Heterozygous<br>PS in RH,<br>shared by DM | PGSC0003DMG40101<br>2477 | PGSC0003DMT4000<br>32484 | chr06 | yes | NO  | GO:0003677; DNA binding; Molecular Function<br>GO:0003700; transcription factor activity; Molecular Function<br>GO:0006352; transcription initiation; Biological Process<br>GO:0006355; regulation of transcription, DNA-dependent; Biological Process<br>GO:0016987; sigma factor activity; Molecular Function |
| 166 | Heterozygous<br>PS in RH,<br>shared by DM | PGSC0003DMG40001<br>2543 | PGSC0003DMT4000<br>32652 | chr03 | yes | NO  | GO:0004866; endopeptidase inhibitor activity; Molecular Function                                                                                                                                                                                                                                                |

|     |                                           |                          |                          |       |     |     |                                                                                                                                                                                                                                                                                                                          |
|-----|-------------------------------------------|--------------------------|--------------------------|-------|-----|-----|--------------------------------------------------------------------------------------------------------------------------------------------------------------------------------------------------------------------------------------------------------------------------------------------------------------------------|
| 167 | Heterozygous<br>PS in RH,<br>shared by DM | PGSC0003DMG40001<br>2595 | PGSC0003DMT4000<br>32799 | chr04 | yes | NO  |                                                                                                                                                                                                                                                                                                                          |
| 168 | Heterozygous<br>PS in RH,<br>shared by DM | PGSC0003DMG40001<br>2599 | PGSC0003DMT4000<br>32806 | -     | yes | yes |                                                                                                                                                                                                                                                                                                                          |
| 169 | Heterozygous<br>PS in RH,<br>shared by DM | PGSC0003DMG40001<br>2789 | PGSC0003DMT4000<br>33300 | chr10 | yes | yes | GO:0004197; cysteine-type endopeptidase activity; Molecular Function<br>GO:0006508; proteolysis; Biological Process                                                                                                                                                                                                      |
| 170 | Heterozygous<br>PS in RH,<br>shared by DM | PGSC0003DMG40001<br>2860 | PGSC0003DMT4000<br>33477 |       |     |     |                                                                                                                                                                                                                                                                                                                          |
| 171 | Heterozygous<br>PS in RH,<br>shared by DM | PGSC0003DMG40201<br>2874 | PGSC0003DMT4000<br>33514 | chr11 | yes | NO  |                                                                                                                                                                                                                                                                                                                          |
| 172 | Heterozygous<br>PS in RH,<br>shared by DM | PGSC0003DMG40001<br>2880 | PGSC0003DMT4000<br>33530 | chr12 | yes | yes |                                                                                                                                                                                                                                                                                                                          |
| 173 | Heterozygous<br>PS in RH,<br>shared by DM | PGSC0003DMG40001<br>2900 | PGSC0003DMT4000<br>33588 | chr05 | NO  | NO  |                                                                                                                                                                                                                                                                                                                          |
| 174 | Heterozygous<br>PS in RH,<br>shared by DM | PGSC0003DMG40001<br>3016 | PGSC0003DMT4000<br>33876 | chr04 | yes | NO  | GO:0003700; transcription factor activity; Molecular Function<br>GO:0005634; nucleus; Cellular Component<br>GO:0006355; regulation of transcription, DNA-dependent; Biological Process<br>GO:0043565; sequence-specific DNA binding; Molecular Function<br>GO:0046983; protein dimerization activity; Molecular Function |
| 175 | Heterozygous<br>PS in RH,<br>shared by DM | PGSC0003DMG40001<br>3091 | PGSC0003DMT4000<br>34063 | chr08 | NO  | NO  |                                                                                                                                                                                                                                                                                                                          |
| 176 | Heterozygous<br>PS in RH,<br>shared by DM | PGSC0003DMG40001<br>3095 | PGSC0003DMT4000<br>34080 | chr05 | yes | yes | GO:0031072; heat shock protein binding; Molecular Function                                                                                                                                                                                                                                                               |



|     |                                           |                          |                          |       |     |     |                                                                                                                                                                                 |
|-----|-------------------------------------------|--------------------------|--------------------------|-------|-----|-----|---------------------------------------------------------------------------------------------------------------------------------------------------------------------------------|
| 177 | Heterozygous<br>PS in RH,<br>shared by DM | PGSC0003DMG40101<br>3193 | PGSC0003DMT4000<br>34309 | chr07 | NO  | NO  | GO:0016747; transferase activity,<br>transferring acyl groups other than amino-<br>acyl groups; Molecular Function                                                              |
| 178 | Heterozygous<br>PS in RH,<br>shared by DM | PGSC0003DMG40201<br>3193 | PGSC0003DMT4000<br>34311 |       |     |     |                                                                                                                                                                                 |
| 179 | Heterozygous<br>PS in RH,<br>shared by DM | PGSC0003DMG40001<br>3232 | PGSC0003DMT4000<br>34411 | -     | NO  | NO  | GO:0008565; protein transporter activity;<br>Molecular Function GO:0015031; protein<br>transport; Biological Process<br>GO:0016021; integral to membrane;<br>Cellular Component |
| 180 | Heterozygous<br>PS in RH,<br>shared by DM | PGSC0003DMG40001<br>3236 | PGSC0003DMT4000<br>34422 | chr11 | yes | NO  | GO:0006520; cellular amino acid<br>metabolic process; Biological Process                                                                                                        |
| 181 | Heterozygous<br>PS in RH,<br>shared by DM | PGSC0003DMG40001<br>3290 | PGSC0003DMT4000<br>34577 | chr02 | yes | yes |                                                                                                                                                                                 |
| 182 | Heterozygous<br>PS in RH,<br>shared by DM | PGSC0003DMG40001<br>3351 | PGSC0003DMT4000<br>34750 | chr01 | yes | NO  | GO:0006364; rRNA processing;<br>Biological Process GO:0032040; small-<br>subunit processome; Cellular Component                                                                 |
| 183 | Heterozygous<br>PS in RH,<br>shared by DM | PGSC0003DMG40001<br>3507 | PGSC0003DMT4000<br>35135 | chr09 | yes | NO  | GO:0016491; oxidoreductase activity;<br>Molecular Function                                                                                                                      |
| 184 | Heterozygous<br>PS in RH,<br>shared by DM | PGSC0003DMG40101<br>3522 | PGSC0003DMT4000<br>35183 | chr04 | NO  | NO  |                                                                                                                                                                                 |
| 185 | Heterozygous<br>PS in RH,<br>shared by DM | PGSC0003DMG40001<br>3568 | PGSC0003DMT4000<br>35313 | chr06 | yes | NO  |                                                                                                                                                                                 |
| 186 | Heterozygous<br>PS in RH,<br>shared by DM | PGSC0003DMG40001<br>3647 | PGSC0003DMT4000<br>35505 | chr06 | yes | NO  |                                                                                                                                                                                 |
| 187 | Heterozygous<br>PS in RH,<br>shared by DM | PGSC0003DMG40001<br>3649 | PGSC0003DMT4000<br>35511 | chr04 | NO  | NO  | GO:0005524; ATP binding; Molecular<br>Function GO:0006915; apoptosis;<br>Biological Process                                                                                     |
| 188 | Heterozygous<br>PS in RH,<br>shared by DM | PGSC0003DMG40001<br>3662 | PGSC0003DMT4000<br>35535 | chr10 | yes | NO  |                                                                                                                                                                                 |

|     |                                           |                          |                          |       |     |     |                                                                                                                                                                                                                                                                                                                                                                                                                                                                                                                    |
|-----|-------------------------------------------|--------------------------|--------------------------|-------|-----|-----|--------------------------------------------------------------------------------------------------------------------------------------------------------------------------------------------------------------------------------------------------------------------------------------------------------------------------------------------------------------------------------------------------------------------------------------------------------------------------------------------------------------------|
| 189 | Heterozygous<br>PS in RH,<br>shared by DM | PGSC0003DMG40001<br>3680 | PGSC0003DMT4000<br>35576 | -     | NO  | NO  |                                                                                                                                                                                                                                                                                                                                                                                                                                                                                                                    |
| 190 | Heterozygous<br>PS in RH,<br>shared by DM | PGSC0003DMG40001<br>3693 | PGSC0003DMT4000<br>35605 | chr12 | yes | NO  | GO:0004672; protein kinase activity;<br>Molecular Function GO:0005524; ATP<br>binding; Molecular Function<br>GO:0006468; protein amino acid<br>phosphorylation; Biological Process                                                                                                                                                                                                                                                                                                                                 |
| 191 | Heterozygous<br>PS in RH,<br>shared by DM | PGSC0003DMG40001<br>3938 | PGSC0003DMT4000<br>36212 | chr04 | NO  | NO  |                                                                                                                                                                                                                                                                                                                                                                                                                                                                                                                    |
| 192 | Heterozygous<br>PS in RH,<br>shared by DM | PGSC0003DMG40001<br>4047 | PGSC0003DMT4000<br>36467 | chr09 | yes | NO  | GO:0004871; signal transducer activity;<br>Molecular Function GO:0009416;<br>response to light stimulus; Biological<br>Process                                                                                                                                                                                                                                                                                                                                                                                     |
| 193 | Heterozygous<br>PS in RH,<br>shared by DM | PGSC0003DMG40101<br>4048 | PGSC0003DMT4000<br>36468 | chr05 | yes | yes |                                                                                                                                                                                                                                                                                                                                                                                                                                                                                                                    |
| 194 | Heterozygous<br>PS in RH,<br>shared by DM | PGSC0003DMG40101<br>4186 | PGSC0003DMT4000<br>36786 | chr01 | NO  | NO  |                                                                                                                                                                                                                                                                                                                                                                                                                                                                                                                    |
| 195 | Heterozygous<br>PS in RH,<br>shared by DM | PGSC0003DMG40001<br>4399 | PGSC0003DMT4000<br>37315 | chr02 | yes | yes | GO:0004672; protein kinase activity;<br>Molecular Function GO:0005524; ATP<br>binding; Molecular Function<br>GO:0006468; protein amino acid<br>phosphorylation; Biological Process<br>GO:0016998; cell wall macromolecule<br>catabolic process; Biological Process<br>GO:0005524; ATP binding; Molecular<br>Function GO:0016020; membrane;<br>Cellular Component GO:0016887; ATPase<br>activity; Molecular Function<br>GO:0005524; ATP binding; Molecular<br>Function GO:0006915; apoptosis;<br>Biological Process |
| 196 | Heterozygous<br>PS in RH,<br>shared by DM | PGSC0003DMG40101<br>4450 | PGSC0003DMT4000<br>37441 | chr11 | yes | NO  |                                                                                                                                                                                                                                                                                                                                                                                                                                                                                                                    |
| 197 | Heterozygous<br>PS in RH,<br>shared by DM | PGSC0003DMG40001<br>4482 | PGSC0003DMT4000<br>37547 | chr06 | yes | NO  |                                                                                                                                                                                                                                                                                                                                                                                                                                                                                                                    |
| 198 | Heterozygous<br>PS in RH,<br>shared by DM | PGSC0003DMG40001<br>4711 | PGSC0003DMT4000<br>38147 | chr04 | NO  | NO  |                                                                                                                                                                                                                                                                                                                                                                                                                                                                                                                    |

|     |                                           |                          |                          |       |     |    |                                                                                                                                                                            |
|-----|-------------------------------------------|--------------------------|--------------------------|-------|-----|----|----------------------------------------------------------------------------------------------------------------------------------------------------------------------------|
| 199 | Heterozygous<br>PS in RH,<br>shared by DM | PGSC0003DMG40001<br>4717 | PGSC0003DMT4000<br>38163 | chr03 | yes | NO |                                                                                                                                                                            |
| 200 | Heterozygous<br>PS in RH,<br>shared by DM | PGSC0003DMG40001<br>4873 | PGSC0003DMT4000<br>38532 | chr05 | yes | NO | GO:0005524; ATP binding; Molecular<br>Function GO:0006915; apoptosis;<br>Biological Process                                                                                |
| 201 | Heterozygous<br>PS in RH,<br>shared by DM | PGSC0003DMG40001<br>4977 | PGSC0003DMT4000<br>38753 | chr09 | NO  | NO |                                                                                                                                                                            |
| 202 | Heterozygous<br>PS in RH,<br>shared by DM | PGSC0003DMG40001<br>5053 | PGSC0003DMT4000<br>38923 | chr03 | NO  | NO | GO:0005515; protein binding; Molecular<br>Function GO:0005524; ATP binding;<br>Molecular Function GO:0044267; cellular<br>protein metabolic process; Biological<br>Process |
| 203 | Heterozygous<br>PS in RH,<br>shared by DM | PGSC0003DMG40001<br>5215 | PGSC0003DMT4000<br>39341 | chr05 | yes | NO | GO:0005524; ATP binding; Molecular<br>Function GO:0006915; apoptosis;<br>Biological Process                                                                                |
| 204 | Heterozygous<br>PS in RH,<br>shared by DM | PGSC0003DMG40001<br>5231 | PGSC0003DMT4000<br>39387 | chr02 | yes | NO | GO:0003676; nucleic acid binding;<br>Molecular Function                                                                                                                    |
| 205 | Heterozygous<br>PS in RH,<br>shared by DM | PGSC0003DMG40001<br>5281 | PGSC0003DMT4000<br>39522 | chr12 | NO  | NO |                                                                                                                                                                            |
| 206 | Heterozygous<br>PS in RH,<br>shared by DM | PGSC0003DMG40001<br>5443 | PGSC0003DMT4000<br>39923 | chr03 | NO  | NO |                                                                                                                                                                            |
| 207 | Heterozygous<br>PS in RH,<br>shared by DM | PGSC0003DMG40001<br>5491 | PGSC0003DMT4000<br>40046 | chr04 | NO  | NO | GO:0003677; DNA binding; Molecular<br>Function GO:0005634; nucleus; Cellular<br>Component                                                                                  |
| 208 | Heterozygous<br>PS in RH,<br>shared by DM | PGSC0003DMG40001<br>5499 | PGSC0003DMT4000<br>40065 | chr11 | yes | NO |                                                                                                                                                                            |
| 209 | Heterozygous<br>PS in RH,<br>shared by DM | PGSC0003DMG40001<br>5793 | PGSC0003DMT4000<br>40848 | chr05 | yes | NO |                                                                                                                                                                            |
| 210 | Heterozygous<br>PS in RH,<br>shared by DM | PGSC0003DMG40001<br>5854 | PGSC0003DMT4000<br>40979 | chr04 | NO  | NO |                                                                                                                                                                            |

|     |                                           |                          |                          |       |     |    |                                                                                                                                                                                                                                                                                                                    |
|-----|-------------------------------------------|--------------------------|--------------------------|-------|-----|----|--------------------------------------------------------------------------------------------------------------------------------------------------------------------------------------------------------------------------------------------------------------------------------------------------------------------|
| 211 | Heterozygous<br>PS in RH,<br>shared by DM | PGSC0003DMG40201<br>5879 | PGSC0003DMT4000<br>41052 | chr03 | yes | NO |                                                                                                                                                                                                                                                                                                                    |
| 212 | Heterozygous<br>PS in RH,<br>shared by DM | PGSC0003DMG40001<br>5969 | PGSC0003DMT4000<br>41251 | chr01 | yes | NO | GO:0003924; GTPase activity; Molecular Function GO:0005525; GTP binding; Molecular Function                                                                                                                                                                                                                        |
| 213 | Heterozygous<br>PS in RH,<br>shared by DM | PGSC0003DMG40001<br>5970 | PGSC0003DMT4000<br>41253 | chr10 | yes | NO | GO:0003924; GTPase activity; Molecular Function GO:0005525; GTP binding; Molecular Function                                                                                                                                                                                                                        |
| 214 | Heterozygous<br>PS in RH,<br>shared by DM | PGSC0003DMG40001<br>6015 | PGSC0003DMT4000<br>41350 | chr09 | yes | NO |                                                                                                                                                                                                                                                                                                                    |
| 215 | Heterozygous<br>PS in RH,<br>shared by DM | PGSC0003DMG40001<br>6029 | PGSC0003DMT4000<br>41376 | chr01 | yes | NO |                                                                                                                                                                                                                                                                                                                    |
| 216 | Heterozygous<br>PS in RH,<br>shared by DM | PGSC0003DMG40101<br>6070 | PGSC0003DMT4000<br>41460 | chr06 | NO  | NO | GO:0004672; protein kinase activity; Molecular Function GO:0005524; ATP binding; Molecular Function GO:0006468; protein amino acid phosphorylation; Biological Process GO:0005524; ATP binding; Molecular Function GO:0016301; kinase activity; Molecular Function GO:0016310; phosphorylation; Biological Process |
| 217 | Heterozygous<br>PS in RH,<br>shared by DM | PGSC0003DMG40001<br>6091 | PGSC0003DMT4000<br>41513 | chr01 | yes | NO | GO:0003723; RNA binding; Molecular Function GO:0003964; RNA-directed DNA polymerase activity; Molecular Function GO:0006278; RNA-dependent DNA replication; Biological Process                                                                                                                                     |
| 218 | Heterozygous<br>PS in RH,<br>shared by DM | PGSC0003DMG40001<br>6132 | PGSC0003DMT4000<br>41615 | -     | NO  | NO |                                                                                                                                                                                                                                                                                                                    |
| 219 | Heterozygous<br>PS in RH,<br>shared by DM | PGSC0003DMG40001<br>6357 | PGSC0003DMT4000<br>42158 | chr08 | yes | NO |                                                                                                                                                                                                                                                                                                                    |
| 220 | Heterozygous<br>PS in RH,<br>shared by DM | PGSC0003DMG40001<br>6439 | PGSC0003DMT4000<br>42395 | chr05 | yes | NO |                                                                                                                                                                                                                                                                                                                    |

|     |                                           |                          |                          |       |     |     |                                                                                                                                                                              |
|-----|-------------------------------------------|--------------------------|--------------------------|-------|-----|-----|------------------------------------------------------------------------------------------------------------------------------------------------------------------------------|
| 221 | Heterozygous<br>PS in RH,<br>shared by DM | PGSC0003DMG40001<br>6497 | PGSC0003DMT4000<br>42531 | chr03 | yes | yes | GO:0004190; aspartic-type endopeptidase activity; Molecular Function<br>GO:0016021; integral to membrane; Cellular Component                                                 |
| 222 | Heterozygous<br>PS in RH,<br>shared by DM | PGSC0003DMG40001<br>6501 | PGSC0003DMT4000<br>42540 | chr10 | yes | yes |                                                                                                                                                                              |
| 223 | Heterozygous<br>PS in RH,<br>shared by DM | PGSC0003DMG40001<br>6522 | PGSC0003DMT4000<br>42604 | chr11 | NO  | NO  |                                                                                                                                                                              |
| 224 | Heterozygous<br>PS in RH,<br>shared by DM | PGSC0003DMG40201<br>6626 | PGSC0003DMT4000<br>42871 | chr05 | NO  | NO  |                                                                                                                                                                              |
| 225 | Heterozygous<br>PS in RH,<br>shared by DM | PGSC0003DMG40001<br>6644 | PGSC0003DMT4000<br>42928 | -     | yes | NO  |                                                                                                                                                                              |
| 226 | Heterozygous<br>PS in RH,<br>shared by DM | PGSC0003DMG40001<br>6681 | PGSC0003DMT4000<br>43011 | chr09 | yes | NO  | GO:0005618; cell wall; Cellular Component<br>GO:0030599; pectinesterase activity; Molecular Function<br>GO:0042545; cell wall modification; Biological Process               |
| 227 | Heterozygous<br>PS in RH,<br>shared by DM | PGSC0003DMG40001<br>6754 | PGSC0003DMT4000<br>43177 | chr03 | yes | NO  |                                                                                                                                                                              |
| 228 | Heterozygous<br>PS in RH,<br>shared by DM | PGSC0003DMG40001<br>6795 | PGSC0003DMT4000<br>43258 | chr03 | NO  | NO  | GO:0006508; proteolysis; Biological Process<br>GO:0008234; cysteine-type peptidase activity; Molecular Function                                                              |
| 229 | Heterozygous<br>PS in RH,<br>shared by DM | PGSC0003DMG40001<br>6849 | PGSC0003DMT4000<br>43405 | chr03 | NO  | NO  |                                                                                                                                                                              |
| 230 | Heterozygous<br>PS in RH,<br>shared by DM | PGSC0003DMG40001<br>6861 | PGSC0003DMT4000<br>43434 | chr08 | NO  | NO  | GO:0004672; protein kinase activity; Molecular Function<br>GO:0005524; ATP binding; Molecular Function<br>GO:0006468; protein amino acid phosphorylation; Biological Process |
| 231 | Heterozygous<br>PS in RH,<br>shared by DM | PGSC0003DMG40001<br>6886 | PGSC0003DMT4000<br>43490 | chr07 | NO  | NO  |                                                                                                                                                                              |

|     |                                           |                          |                          |       |     |     |                                                                                                                                                                                                                                                                                                                                          |
|-----|-------------------------------------------|--------------------------|--------------------------|-------|-----|-----|------------------------------------------------------------------------------------------------------------------------------------------------------------------------------------------------------------------------------------------------------------------------------------------------------------------------------------------|
| 232 | Heterozygous<br>PS in RH,<br>shared by DM | PGSC0003DMG40001<br>6931 | PGSC0003DMT4000<br>43601 | chr06 | yes | NO  |                                                                                                                                                                                                                                                                                                                                          |
| 233 | Heterozygous<br>PS in RH,<br>shared by DM | PGSC0003DMG40001<br>6968 | PGSC0003DMT4000<br>43689 | chr04 | NO  | NO  |                                                                                                                                                                                                                                                                                                                                          |
| 234 | Heterozygous<br>PS in RH,<br>shared by DM | PGSC0003DMG40301<br>6981 | PGSC0003DMT4000<br>43733 | chr04 | NO  | NO  | GO:0005215; transporter activity;<br>Molecular Function GO:0006810;<br>transport; Biological Process<br>GO:0016021; integral to membrane;<br>Cellular Component GO:0055085;<br>transmembrane transport; Biological<br>Process                                                                                                            |
| 235 | Heterozygous<br>PS in RH,<br>shared by DM | PGSC0003DMG40001<br>7061 | PGSC0003DMT4000<br>43961 | chr07 | yes | NO  | GO:0003723; RNA binding; Molecular<br>Function GO:0003964; RNA-directed<br>DNA polymerase activity; Molecular<br>Function GO:0006278; RNA-dependent<br>DNA replication; Biological Process<br>GO:0006629; lipid metabolic process;<br>Biological Process GO:0016788;<br>hydrolase activity, acting on ester bonds;<br>Molecular Function |
| 236 | Heterozygous<br>PS in RH,<br>shared by DM | PGSC0003DMG40001<br>7069 | PGSC0003DMT4000<br>43981 | chr08 | yes | yes | GO:0005215; transporter activity;<br>Molecular Function GO:0006814; sodium<br>ion transport; Biological Process<br>GO:0016020; membrane; Cellular<br>Component GO:0055085; transmembrane<br>transport; Biological Process                                                                                                                |
| 237 | Heterozygous<br>PS in RH,<br>shared by DM | PGSC0003DMG40001<br>7087 | PGSC0003DMT4000<br>44032 | chr01 | yes | yes |                                                                                                                                                                                                                                                                                                                                          |
| 238 | Heterozygous<br>PS in RH,<br>shared by DM | PGSC0003DMG40001<br>7163 | PGSC0003DMT4000<br>44207 | -     | yes | NO  |                                                                                                                                                                                                                                                                                                                                          |
| 239 | Heterozygous<br>PS in RH,<br>shared by DM | PGSC0003DMG40001<br>7235 | PGSC0003DMT4000<br>44390 | chr12 | NO  | NO  |                                                                                                                                                                                                                                                                                                                                          |
| 240 | Heterozygous<br>PS in RH,<br>shared by DM | PGSC0003DMG40001<br>7447 | PGSC0003DMT4000<br>44985 | -     | NO  | NO  |                                                                                                                                                                                                                                                                                                                                          |

|     |                                           |                          |                          |       |     |     |                                                                                                                                                                                                                                                                                                                                                                                                                                                                                                        |
|-----|-------------------------------------------|--------------------------|--------------------------|-------|-----|-----|--------------------------------------------------------------------------------------------------------------------------------------------------------------------------------------------------------------------------------------------------------------------------------------------------------------------------------------------------------------------------------------------------------------------------------------------------------------------------------------------------------|
| 241 | Heterozygous<br>PS in RH,<br>shared by DM | PGSC0003DMG40001<br>7560 | PGSC0003DMT4000<br>45267 | chr11 | NO  | NO  |                                                                                                                                                                                                                                                                                                                                                                                                                                                                                                        |
| 242 | Heterozygous<br>PS in RH,<br>shared by DM | PGSC0003DMG40001<br>7605 | PGSC0003DMT4000<br>45367 | chr11 | yes | yes |                                                                                                                                                                                                                                                                                                                                                                                                                                                                                                        |
| 243 | Heterozygous<br>PS in RH,<br>shared by DM | PGSC0003DMG40001<br>7620 | PGSC0003DMT4000<br>45412 | chr09 | yes | yes |                                                                                                                                                                                                                                                                                                                                                                                                                                                                                                        |
| 244 | Heterozygous<br>PS in RH,<br>shared by DM | PGSC0003DMG40001<br>7777 | PGSC0003DMT4000<br>45835 |       |     |     |                                                                                                                                                                                                                                                                                                                                                                                                                                                                                                        |
| 245 | Heterozygous<br>PS in RH,<br>shared by DM | PGSC0003DMG40001<br>7789 | PGSC0003DMT4000<br>45859 | chr06 | yes | yes |                                                                                                                                                                                                                                                                                                                                                                                                                                                                                                        |
| 246 | Heterozygous<br>PS in RH,<br>shared by DM | PGSC0003DMG40001<br>8061 | PGSC0003DMT4000<br>46529 | chr06 | yes | yes | GO:0005737; cytoplasm; Cellular Component GO:0005975; carbohydrate metabolic process; Biological Process GO:0016614; oxidoreductase activity, acting on CH-OH group of donors; Molecular Function GO:0016616; oxidoreductase activity, acting on the CH-OH group of donors, NAD or NADP as acceptor; Molecular Function GO:0046168; glycerol-3-phosphate catabolic process; Biological Process GO:0051287; NAD or NADH binding; Molecular Function GO:0055114; oxidation reduction; Biological Process |
| 247 | Heterozygous<br>PS in RH,<br>shared by DM | PGSC0003DMG40001<br>8102 | PGSC0003DMT4000<br>46621 | -     | NO  | NO  |                                                                                                                                                                                                                                                                                                                                                                                                                                                                                                        |
| 248 | Heterozygous<br>PS in RH,<br>shared by DM | PGSC0003DMG40001<br>8195 | PGSC0003DMT4000<br>46853 | chr02 | yes | NO  | GO:0008152; metabolic process; Biological Process GO:0016758; transferase activity, transferring hexosyl groups; Molecular Function                                                                                                                                                                                                                                                                                                                                                                    |

|     |                                           |                          |                          |       |     |     |                                                                                                                                                                                                                                   |
|-----|-------------------------------------------|--------------------------|--------------------------|-------|-----|-----|-----------------------------------------------------------------------------------------------------------------------------------------------------------------------------------------------------------------------------------|
| 249 | Heterozygous<br>PS in RH,<br>shared by DM | PGSC0003DMG40001<br>8261 | PGSC0003DMT4000<br>47018 | chr11 | yes | NO  |                                                                                                                                                                                                                                   |
| 250 | Heterozygous<br>PS in RH,<br>shared by DM | PGSC0003DMG40001<br>8269 | PGSC0003DMT4000<br>47047 | chr11 | yes | NO  | GO:0010181; FMN binding; Molecular Function GO:0016491; oxidoreductase activity; Molecular Function                                                                                                                               |
| 251 | Heterozygous<br>PS in RH,<br>shared by DM | PGSC0003DMG40001<br>8322 | PGSC0003DMT4000<br>47206 | chr03 | yes | yes | GO:0016616; oxidoreductase activity, acting on the CH-OH group of donors, NAD or NADP as acceptor; Molecular Function GO:0051287; NAD or NADH binding; Molecular Function                                                         |
| 252 | Heterozygous<br>PS in RH,<br>shared by DM | PGSC0003DMG40001<br>8337 | PGSC0003DMT4000<br>47231 | chr01 | NO  | NO  |                                                                                                                                                                                                                                   |
| 253 | Heterozygous<br>PS in RH,<br>shared by DM | PGSC0003DMG40101<br>8347 | PGSC0003DMT4000<br>47256 | chr10 | NO  | NO  |                                                                                                                                                                                                                                   |
| 254 | Heterozygous<br>PS in RH,<br>shared by DM | PGSC0003DMG40001<br>8369 | PGSC0003DMT4000<br>47299 | chr12 | NO  | NO  |                                                                                                                                                                                                                                   |
| 255 | Heterozygous<br>PS in RH,<br>shared by DM | PGSC0003DMG40001<br>8411 | PGSC0003DMT4000<br>47378 | chr12 | yes | yes |                                                                                                                                                                                                                                   |
| 256 | Heterozygous<br>PS in RH,<br>shared by DM | PGSC0003DMG40001<br>8489 | PGSC0003DMT4000<br>47576 | chr12 | yes | yes |                                                                                                                                                                                                                                   |
| 257 | Heterozygous<br>PS in RH,<br>shared by DM | PGSC0003DMG40001<br>8491 | PGSC0003DMT4000<br>47580 | chr01 | yes | NO  | GO:0005524; ATP binding; Molecular Function GO:0006915; apoptosis; Biological Process                                                                                                                                             |
| 258 | Heterozygous<br>PS in RH,<br>shared by DM | PGSC0003DMG40001<br>8499 | PGSC0003DMT4000<br>47599 | chr10 | NO  | NO  | GO:0006812; cation transport; Biological Process GO:0015299; solute:hydrogen antiporter activity; Molecular Function GO:0016021; integral to membrane; Cellular Component GO:0055085; transmembrane transport; Biological Process |



|     |                                           |                          |                          |       |     |     |                                                                                                                                                                                                                                                                                          |
|-----|-------------------------------------------|--------------------------|--------------------------|-------|-----|-----|------------------------------------------------------------------------------------------------------------------------------------------------------------------------------------------------------------------------------------------------------------------------------------------|
| 259 | Heterozygous<br>PS in RH,<br>shared by DM | PGSC0003DMG40001<br>8513 | PGSC0003DMT4000<br>47633 | chr12 | NO  | NO  | GO:0003677; DNA binding; Molecular Function GO:0045449; regulation of transcription; Biological Process GO:0006621; protein retention in ER lumen; Biological Process GO:0016021; integral to membrane; Cellular Component GO:0046923; ER retention sequence binding; Molecular Function |
| 260 | Heterozygous<br>PS in RH,<br>shared by DM | PGSC0003DMG40001<br>8591 | PGSC0003DMT4000<br>47836 | chr01 | yes | NO  |                                                                                                                                                                                                                                                                                          |
| 261 | Heterozygous<br>PS in RH,<br>shared by DM | PGSC0003DMG40001<br>8623 | PGSC0003DMT4000<br>47919 | -     | yes | NO  |                                                                                                                                                                                                                                                                                          |
| 262 | Heterozygous<br>PS in RH,<br>shared by DM | PGSC0003DMG40201<br>8643 | PGSC0003DMT4000<br>47980 | chr02 | yes | yes |                                                                                                                                                                                                                                                                                          |
| 263 | Heterozygous<br>PS in RH,<br>shared by DM | PGSC0003DMG40201<br>8748 | PGSC0003DMT4000<br>48258 | chr11 | yes | yes |                                                                                                                                                                                                                                                                                          |
| 264 | Heterozygous<br>PS in RH,<br>shared by DM | PGSC0003DMG40001<br>8755 | PGSC0003DMT4000<br>48272 | chr09 | NO  | NO  |                                                                                                                                                                                                                                                                                          |
| 265 | Heterozygous<br>PS in RH,<br>shared by DM | PGSC0003DMG40001<br>8778 | PGSC0003DMT4000<br>48328 | chr09 | yes | yes |                                                                                                                                                                                                                                                                                          |
| 266 | Heterozygous<br>PS in RH,<br>shared by DM | PGSC0003DMG40101<br>8864 | PGSC0003DMT4000<br>48561 | -     | NO  | NO  |                                                                                                                                                                                                                                                                                          |
| 267 | Heterozygous<br>PS in RH,<br>shared by DM | PGSC0003DMG40001<br>8866 | PGSC0003DMT4000<br>48565 | chr06 | NO  | NO  |                                                                                                                                                                                                                                                                                          |
| 268 | Heterozygous<br>PS in RH,<br>shared by DM | PGSC0003DMG40001<br>8885 | PGSC0003DMT4000<br>48610 | chr12 | NO  | NO  |                                                                                                                                                                                                                                                                                          |
| 269 | Heterozygous<br>PS in RH,<br>shared by DM | PGSC0003DMG40001<br>9145 | PGSC0003DMT4000<br>49243 | chr06 | yes | yes |                                                                                                                                                                                                                                                                                          |
| 270 | Heterozygous<br>PS in RH,<br>shared by DM | PGSC0003DMG40001<br>9210 | PGSC0003DMT4000<br>49445 | chr10 | yes | NO  |                                                                                                                                                                                                                                                                                          |

|     |                                           |                          |                          |       |     |    |                                                                                                                                                                                                                                                                                                                                                                                |
|-----|-------------------------------------------|--------------------------|--------------------------|-------|-----|----|--------------------------------------------------------------------------------------------------------------------------------------------------------------------------------------------------------------------------------------------------------------------------------------------------------------------------------------------------------------------------------|
| 271 | Heterozygous<br>PS in RH,<br>shared by DM | PGSC0003DMG40201<br>9226 | PGSC0003DMT4000<br>49482 | -     | NO  | NO |                                                                                                                                                                                                                                                                                                                                                                                |
| 272 | Heterozygous<br>PS in RH,<br>shared by DM | PGSC0003DMG40001<br>9237 | PGSC0003DMT4000<br>49507 | chr10 | yes | NO | GO:0005524; ATP binding; Molecular<br>Function GO:0006810; transport;<br>Biological Process GO:0016021; integral<br>to membrane; Cellular Component<br>GO:0016887; ATPase activity; Molecular<br>Function GO:0042626; ATPase activity,<br>coupled to transmembrane movement of<br>substances; Molecular Function<br>GO:0055085; transmembrane transport;<br>Biological Process |
| 273 | Heterozygous<br>PS in RH,<br>shared by DM | PGSC0003DMG40001<br>9324 | PGSC0003DMT4000<br>49738 | chr02 | NO  | NO |                                                                                                                                                                                                                                                                                                                                                                                |
| 274 | Heterozygous<br>PS in RH,<br>shared by DM | PGSC0003DMG40001<br>9370 | PGSC0003DMT4000<br>49853 | chr09 | NO  | NO |                                                                                                                                                                                                                                                                                                                                                                                |
| 275 | Heterozygous<br>PS in RH,<br>shared by DM | PGSC0003DMG40001<br>9544 | PGSC0003DMT4000<br>50302 | chr12 | yes | NO |                                                                                                                                                                                                                                                                                                                                                                                |
| 276 | Heterozygous<br>PS in RH,<br>shared by DM | PGSC0003DMG40001<br>9580 | PGSC0003DMT4000<br>50373 | chr06 | yes | NO |                                                                                                                                                                                                                                                                                                                                                                                |
| 277 | Heterozygous<br>PS in RH,<br>shared by DM | PGSC0003DMG40001<br>9655 | PGSC0003DMT4000<br>50574 | chr08 | yes | NO |                                                                                                                                                                                                                                                                                                                                                                                |
| 278 | Heterozygous<br>PS in RH,<br>shared by DM | PGSC0003DMG40002<br>0074 | PGSC0003DMT4000<br>51692 | chr11 | NO  | NO |                                                                                                                                                                                                                                                                                                                                                                                |
| 279 | Heterozygous<br>PS in RH,<br>shared by DM | PGSC0003DMG40102<br>0229 | PGSC0003DMT4000<br>52119 | chr03 | yes | NO |                                                                                                                                                                                                                                                                                                                                                                                |

|     |                                           |                          |                          |       |     |     |                                                                                                                                                                                        |
|-----|-------------------------------------------|--------------------------|--------------------------|-------|-----|-----|----------------------------------------------------------------------------------------------------------------------------------------------------------------------------------------|
| 280 | Heterozygous<br>PS in RH,<br>shared by DM | PGSC0003DMG40302<br>0229 | PGSC0003DMT4000<br>52131 | chr07 | yes | NO  | GO:0005622; intracellular; Cellular<br>Component GO:0006464; protein<br>modification process; Biological Process<br>GO:0016881; acid-amino acid ligase<br>activity; Molecular Function |
| 281 | Heterozygous<br>PS in RH,<br>shared by DM | PGSC0003DMG40002<br>0234 | PGSC0003DMT4000<br>52151 | chr07 | yes | NO  |                                                                                                                                                                                        |
| 282 | Heterozygous<br>PS in RH,<br>shared by DM | PGSC0003DMG40002<br>0249 | PGSC0003DMT4000<br>52209 | chr06 | yes | NO  | GO:0004190; aspartic-type endopeptidase<br>activity; Molecular Function<br>GO:0006508; proteolysis; Biological<br>Process                                                              |
| 283 | Heterozygous<br>PS in RH,<br>shared by DM | PGSC0003DMG40002<br>0316 | PGSC0003DMT4000<br>52337 | chr02 | yes | NO  |                                                                                                                                                                                        |
| 284 | Heterozygous<br>PS in RH,<br>shared by DM | PGSC0003DMG40002<br>0365 | PGSC0003DMT4000<br>52472 | chr01 | yes | NO  |                                                                                                                                                                                        |
| 285 | Heterozygous<br>PS in RH,<br>shared by DM | PGSC0003DMG40002<br>0383 | PGSC0003DMT4000<br>52535 | chr10 | yes | yes |                                                                                                                                                                                        |
| 286 | Heterozygous<br>PS in RH,<br>shared by DM | PGSC0003DMG40002<br>0428 | PGSC0003DMT4000<br>52626 | chr03 | NO  | NO  |                                                                                                                                                                                        |
| 287 | Heterozygous<br>PS in RH,<br>shared by DM | PGSC0003DMG40002<br>0435 | PGSC0003DMT4000<br>52645 | chr10 | yes | NO  | GO:0005622; intracellular; Cellular<br>Component GO:0008270; zinc ion<br>binding; Molecular Function                                                                                   |
| 288 | Heterozygous<br>PS in RH,<br>shared by DM | PGSC0003DMG40002<br>0491 | PGSC0003DMT4000<br>52800 | chr08 | yes | yes | GO:0005524; ATP binding; Molecular<br>Function GO:0016020; membrane;<br>Cellular Component GO:0016887; ATPase<br>activity; Molecular Function                                          |
| 289 | Heterozygous<br>PS in RH,<br>shared by DM | PGSC0003DMG40002<br>0523 | PGSC0003DMT4000<br>52899 | chr02 | NO  | NO  |                                                                                                                                                                                        |
| 290 | Heterozygous<br>PS in RH,<br>shared by DM | PGSC0003DMG40002<br>0671 | PGSC0003DMT4000<br>53258 | chr02 | yes | yes |                                                                                                                                                                                        |

|     |                                           |                          |                          |       |     |     |                                             |
|-----|-------------------------------------------|--------------------------|--------------------------|-------|-----|-----|---------------------------------------------|
| 291 | Heterozygous<br>PS in RH,<br>shared by DM | PGSC0003DMG40002<br>0793 | PGSC0003DMT4000<br>53597 | chr10 | NO  | NO  |                                             |
| 292 | Heterozygous<br>PS in RH,<br>shared by DM | PGSC0003DMG40002<br>0851 | PGSC0003DMT4000<br>53754 | chr09 | NO  | NO  |                                             |
| 293 | Heterozygous<br>PS in RH,<br>shared by DM | PGSC0003DMG40002<br>0878 | PGSC0003DMT4000<br>53823 | chr04 | yes | yes |                                             |
| 294 | Heterozygous<br>PS in RH,<br>shared by DM | PGSC0003DMG40002<br>0989 | PGSC0003DMT4000<br>54119 | chr05 | NO  | NO  |                                             |
| 295 | Heterozygous<br>PS in RH,<br>shared by DM | PGSC0003DMG40002<br>1144 | PGSC0003DMT4000<br>54480 | chr10 | NO  | NO  |                                             |
| 296 | Heterozygous<br>PS in RH,<br>shared by DM | PGSC0003DMG40002<br>1200 | PGSC0003DMT4000<br>54625 | chr07 | NO  | NO  |                                             |
| 297 | Heterozygous<br>PS in RH,<br>shared by DM | PGSC0003DMG40002<br>1203 | PGSC0003DMT4000<br>54636 | chr11 | yes | NO  |                                             |
| 298 | Heterozygous<br>PS in RH,<br>shared by DM | PGSC0003DMG40002<br>1409 | PGSC0003DMT4000<br>55162 | chr04 | yes | NO  | GO:0016020; membrane; Cellular<br>Component |
| 299 | Heterozygous<br>PS in RH,<br>shared by DM | PGSC0003DMG40002<br>1472 | PGSC0003DMT4000<br>55319 | chr11 | yes | yes |                                             |
| 300 | Heterozygous<br>PS in RH,<br>shared by DM | PGSC0003DMG40002<br>1595 | PGSC0003DMT4000<br>55608 | chr08 | NO  | NO  |                                             |
| 301 | Heterozygous<br>PS in RH,<br>shared by DM | PGSC0003DMG40002<br>1644 | PGSC0003DMT4000<br>55739 | chr02 | NO  | NO  |                                             |
| 302 | Heterozygous<br>PS in RH,<br>shared by DM | PGSC0003DMG40002<br>1658 | PGSC0003DMT4000<br>55769 | chr12 | NO  | NO  |                                             |

|     |                                           |                          |                          |       |     |     |                                                                                                                                                                      |
|-----|-------------------------------------------|--------------------------|--------------------------|-------|-----|-----|----------------------------------------------------------------------------------------------------------------------------------------------------------------------|
| 303 | Heterozygous<br>PS in RH,<br>shared by DM | PGSC0003DMG40002<br>1668 | PGSC0003DMT4000<br>55790 | -     | NO  | NO  |                                                                                                                                                                      |
| 304 | Heterozygous<br>PS in RH,<br>shared by DM | PGSC0003DMG40002<br>1795 | PGSC0003DMT4000<br>56108 | chr10 | yes | yes |                                                                                                                                                                      |
| 305 | Heterozygous<br>PS in RH,<br>shared by DM | PGSC0003DMG40002<br>1849 | PGSC0003DMT4000<br>56238 |       |     |     |                                                                                                                                                                      |
| 306 | Heterozygous<br>PS in RH,<br>shared by DM | PGSC0003DMG40002<br>1871 | PGSC0003DMT4000<br>56296 | chr04 | NO  | NO  | GO:0006629; lipid metabolic process;<br>Biological Process GO:0016788;<br>hydrolase activity, acting on ester bonds;<br>Molecular Function                           |
| 307 | Heterozygous<br>PS in RH,<br>shared by DM | PGSC0003DMG40002<br>2033 | PGSC0003DMT4000<br>56658 | -     | NO  | NO  |                                                                                                                                                                      |
| 308 | Heterozygous<br>PS in RH,<br>shared by DM | PGSC0003DMG40002<br>2113 | PGSC0003DMT4000<br>56847 | chr03 | yes | yes |                                                                                                                                                                      |
| 309 | Heterozygous<br>PS in RH,<br>shared by DM | PGSC0003DMG40102<br>2253 | PGSC0003DMT4000<br>57292 | chr09 | yes | yes | GO:0003677; DNA binding; Molecular<br>Function GO:0008270; zinc ion binding;<br>Molecular Function GO:0045449;<br>regulation of transcription; Biological<br>Process |
| 310 | Heterozygous<br>PS in RH,<br>shared by DM | PGSC0003DMG40002<br>2258 | PGSC0003DMT4000<br>57320 | chr06 | yes | yes |                                                                                                                                                                      |
| 311 | Heterozygous<br>PS in RH,<br>shared by DM | PGSC0003DMG40002<br>2294 | PGSC0003DMT4000<br>57418 | chr08 | yes | yes |                                                                                                                                                                      |
| 312 | Heterozygous<br>PS in RH,<br>shared by DM | PGSC0003DMG40002<br>2422 | PGSC0003DMT4000<br>57758 | -     | NO  | NO  |                                                                                                                                                                      |
| 313 | Heterozygous<br>PS in RH,<br>shared by DM | PGSC0003DMG40002<br>2438 | PGSC0003DMT4000<br>57795 | chr03 | yes | NO  |                                                                                                                                                                      |

|     |                                           |                          |                          |       |     |     |                                                                                                                                                                                                                                                                                                                          |
|-----|-------------------------------------------|--------------------------|--------------------------|-------|-----|-----|--------------------------------------------------------------------------------------------------------------------------------------------------------------------------------------------------------------------------------------------------------------------------------------------------------------------------|
| 314 | Heterozygous<br>PS in RH,<br>shared by DM | PGSC0003DMG40002<br>2512 | PGSC0003DMT4000<br>57990 | chr05 | yes | NO  |                                                                                                                                                                                                                                                                                                                          |
| 315 | Heterozygous<br>PS in RH,<br>shared by DM | PGSC0003DMG40002<br>2517 | PGSC0003DMT4000<br>57997 | chr06 | yes | NO  | GO:0000276; mitochondrial proton-transporting ATP synthase complex, coupling factor F(o); Cellular Component GO:0015078; hydrogen ion transmembrane transporter activity; Molecular Function GO:0015986; ATP synthesis coupled proton transport; Biological Process GO:0003676; nucleic acid binding; Molecular Function |
| 316 | Heterozygous<br>PS in RH,<br>shared by DM | PGSC0003DMG40002<br>2532 | PGSC0003DMT4000<br>58039 | chr06 | yes | NO  | GO:0003676; nucleic acid binding; Molecular Function                                                                                                                                                                                                                                                                     |
| 317 | Heterozygous<br>PS in RH,<br>shared by DM | PGSC0003DMG40002<br>2558 | PGSC0003DMT4000<br>58116 | -     | yes | yes |                                                                                                                                                                                                                                                                                                                          |
| 318 | Heterozygous<br>PS in RH,<br>shared by DM | PGSC0003DMG40002<br>2609 | PGSC0003DMT4000<br>58225 | -     | yes | NO  | GO:0008270; zinc ion binding; Molecular Function                                                                                                                                                                                                                                                                         |
| 319 | Heterozygous<br>PS in RH,<br>shared by DM | PGSC0003DMG40002<br>2753 | PGSC0003DMT4000<br>58574 | chr01 | yes | NO  |                                                                                                                                                                                                                                                                                                                          |
| 320 | Heterozygous<br>PS in RH,<br>shared by DM | PGSC0003DMG40002<br>2787 | PGSC0003DMT4000<br>58657 | chr04 | NO  | NO  |                                                                                                                                                                                                                                                                                                                          |
| 321 | Heterozygous<br>PS in RH,<br>shared by DM | PGSC0003DMG40002<br>2790 | PGSC0003DMT4000<br>58668 | chr09 | yes | NO  | GO:0004553; hydrolase activity, hydrolyzing O-glycosyl compounds; Molecular Function GO:0005975; carbohydrate metabolic process; Biological Process                                                                                                                                                                      |
| 322 | Heterozygous<br>PS in RH,<br>shared by DM | PGSC0003DMG40002<br>2891 | PGSC0003DMT4000<br>58923 | chr09 | NO  | NO  | GO:0004497; monooxygenase activity; Molecular Function GO:0005506; iron ion binding; Molecular Function GO:0009055; electron carrier activity; Molecular Function GO:0020037; heme binding; Molecular Function                                                                                                           |

|     |                                           |                          |                          |       |     |     |                                                                                                                                                                                                   |
|-----|-------------------------------------------|--------------------------|--------------------------|-------|-----|-----|---------------------------------------------------------------------------------------------------------------------------------------------------------------------------------------------------|
| 323 | Heterozygous<br>PS in RH,<br>shared by DM | PGSC0003DMG40102<br>3052 | PGSC0003DMT4000<br>59327 | chr11 | yes | NO  | GO:0003677; DNA binding; Molecular<br>Function GO:0045449; regulation of<br>transcription; Biological Process                                                                                     |
| 324 | Heterozygous<br>PS in RH,<br>shared by DM | PGSC0003DMG40002<br>3053 | PGSC0003DMT4000<br>59330 | chr04 | yes | yes | GO:0003677; DNA binding; Molecular<br>Function GO:0005634; nucleus; Cellular<br>Component                                                                                                         |
| 325 | Heterozygous<br>PS in RH,<br>shared by DM | PGSC0003DMG40002<br>3385 | PGSC0003DMT4000<br>60114 | chr08 | NO  | NO  | GO:0003824; catalytic activity; Molecular<br>Function GO:0005992; trehalose<br>biosynthetic process; Biological Process                                                                           |
| 326 | Heterozygous<br>PS in RH,<br>shared by DM | PGSC0003DMG40102<br>3433 | PGSC0003DMT4000<br>60236 | chr05 | yes | yes | GO:0005524; ATP binding; Molecular<br>Function GO:0006915; apoptosis;<br>Biological Process                                                                                                       |
| 327 | Heterozygous<br>PS in RH,<br>shared by DM | PGSC0003DMG40002<br>3537 | PGSC0003DMT4000<br>60513 | chr09 | yes | NO  | GO:0004568; chitinase activity;<br>Molecular Function GO:0006032; chitin<br>catabolic process; Biological Process<br>GO:0016998; cell wall macromolecule<br>catabolic process; Biological Process |
| 328 | Heterozygous<br>PS in RH,<br>shared by DM | PGSC0003DMG40002<br>3663 | PGSC0003DMT4000<br>60833 | chr05 | NO  | NO  |                                                                                                                                                                                                   |
| 329 | Heterozygous<br>PS in RH,<br>shared by DM | PGSC0003DMG40002<br>3750 | PGSC0003DMT4000<br>61035 | chr09 | yes | yes |                                                                                                                                                                                                   |
| 330 | Heterozygous<br>PS in RH,<br>shared by DM | PGSC0003DMG40002<br>3800 | PGSC0003DMT4000<br>61161 | chr04 | yes | yes |                                                                                                                                                                                                   |
| 331 | Heterozygous<br>PS in RH,<br>shared by DM | PGSC0003DMG40002<br>3819 | PGSC0003DMT4000<br>61190 |       |     |     |                                                                                                                                                                                                   |
| 332 | Heterozygous<br>PS in RH,<br>shared by DM | PGSC0003DMG40002<br>3914 | PGSC0003DMT4000<br>61444 | chr11 | NO  | NO  |                                                                                                                                                                                                   |
| 333 | Heterozygous<br>PS in RH,<br>shared by DM | PGSC0003DMG40002<br>3957 | PGSC0003DMT4000<br>61553 | chr04 | NO  | NO  |                                                                                                                                                                                                   |

|     |                                           |                          |                          |       |     |     |                                                                                                                                                                              |
|-----|-------------------------------------------|--------------------------|--------------------------|-------|-----|-----|------------------------------------------------------------------------------------------------------------------------------------------------------------------------------|
| 334 | Heterozygous<br>PS in RH,<br>shared by DM | PGSC0003DMG40002<br>4117 | PGSC0003DMT4000<br>61965 | chr01 | NO  | NO  |                                                                                                                                                                              |
| 335 | Heterozygous<br>PS in RH,<br>shared by DM | PGSC0003DMG40002<br>4209 | PGSC0003DMT4000<br>62205 | chr01 | yes | yes | GO:0006886; intracellular protein transport; Biological Process<br>GO:0008565; protein transporter activity; Molecular Function                                              |
| 336 | Heterozygous<br>PS in RH,<br>shared by DM | PGSC0003DMG40002<br>4277 | PGSC0003DMT4000<br>62379 | chr08 | yes | yes | GO:0015671; oxygen transport; Biological Process<br>GO:0019825; oxygen binding; Molecular Function                                                                           |
| 337 | Heterozygous<br>PS in RH,<br>shared by DM | PGSC0003DMG40002<br>4356 | PGSC0003DMT4000<br>62593 | chr03 | yes | NO  | GO:0004867; serine-type endopeptidase inhibitor activity; Molecular Function                                                                                                 |
| 338 | Heterozygous<br>PS in RH,<br>shared by DM | PGSC0003DMG40202<br>4473 | PGSC0003DMT4000<br>62874 | -     | NO  | NO  |                                                                                                                                                                              |
| 339 | Heterozygous<br>PS in RH,<br>shared by DM | PGSC0003DMG40002<br>4474 | PGSC0003DMT4000<br>62877 | chr01 | yes | NO  |                                                                                                                                                                              |
| 340 | Heterozygous<br>PS in RH,<br>shared by DM | PGSC0003DMG40002<br>4608 | PGSC0003DMT4000<br>63270 | chr10 | NO  | NO  |                                                                                                                                                                              |
| 341 | Heterozygous<br>PS in RH,<br>shared by DM | PGSC0003DMG40002<br>4655 | PGSC0003DMT4000<br>63385 | chr08 | NO  | NO  |                                                                                                                                                                              |
| 342 | Heterozygous<br>PS in RH,<br>shared by DM | PGSC0003DMG40202<br>4817 | PGSC0003DMT4000<br>63848 | chr06 | yes | NO  | GO:0004640; phosphoribosylanthranilate isomerase activity; Molecular Function<br>GO:0006568; tryptophan metabolic process; Biological Process                                |
| 343 | Heterozygous<br>PS in RH,<br>shared by DM | PGSC0003DMG40002<br>4823 | PGSC0003DMT4000<br>63864 | -     | yes | yes | GO:0004672; protein kinase activity; Molecular Function<br>GO:0005524; ATP binding; Molecular Function<br>GO:0006468; protein amino acid phosphorylation; Biological Process |
| 344 | Heterozygous<br>PS in RH,<br>shared by DM | PGSC0003DMG40002<br>4989 | PGSC0003DMT4000<br>64322 | chr03 | yes | NO  | GO:0005622; intracellular; Cellular Component<br>GO:0008270; zinc ion binding; Molecular Function                                                                            |



|     |                                           |                          |                          |       |     |     |                                                                                                                                                                                                                                                                 |
|-----|-------------------------------------------|--------------------------|--------------------------|-------|-----|-----|-----------------------------------------------------------------------------------------------------------------------------------------------------------------------------------------------------------------------------------------------------------------|
| 345 | Heterozygous<br>PS in RH,<br>shared by DM | PGSC0003DMG40002<br>5054 | PGSC0003DMT4000<br>64478 | chr01 | yes | NO  | GO:0000160; two-component signal transduction system (phosphorelay); Biological Process GO:0004871; signal transducer activity; Molecular Function GO:0016021; integral to membrane; Cellular Component GO:0055085; transmembrane transport; Biological Process |
| 346 | Heterozygous<br>PS in RH,<br>shared by DM | PGSC0003DMG40002<br>5122 | PGSC0003DMT4000<br>64673 | chr02 | yes | yes |                                                                                                                                                                                                                                                                 |
| 347 | Heterozygous<br>PS in RH,<br>shared by DM | PGSC0003DMG40002<br>5175 | PGSC0003DMT4000<br>64824 | chr06 | NO  | NO  |                                                                                                                                                                                                                                                                 |
| 348 | Heterozygous<br>PS in RH,<br>shared by DM | PGSC0003DMG40002<br>5227 | PGSC0003DMT4000<br>64957 | chr10 | NO  | NO  |                                                                                                                                                                                                                                                                 |
| 349 | Heterozygous<br>PS in RH,<br>shared by DM | PGSC0003DMG40002<br>5283 | PGSC0003DMT4000<br>65069 | chr02 | yes | NO  |                                                                                                                                                                                                                                                                 |
| 350 | Heterozygous<br>PS in RH,<br>shared by DM | PGSC0003DMG40002<br>5331 | PGSC0003DMT4000<br>65176 | chr06 | yes | NO  |                                                                                                                                                                                                                                                                 |
| 351 | Heterozygous<br>PS in RH,<br>shared by DM | PGSC0003DMG40002<br>5373 | PGSC0003DMT4000<br>65273 | chr12 | NO  | NO  | GO:0004857; enzyme inhibitor activity; Molecular Function GO:0030599; pectinesterase activity; Molecular Function                                                                                                                                               |
| 352 | Heterozygous<br>PS in RH,<br>shared by DM | PGSC0003DMG40002<br>5379 | PGSC0003DMT4000<br>65290 | chr07 | yes | yes |                                                                                                                                                                                                                                                                 |
| 353 | Heterozygous<br>PS in RH,<br>shared by DM | PGSC0003DMG40102<br>5391 | PGSC0003DMT4000<br>65314 | chr10 | yes | NO  |                                                                                                                                                                                                                                                                 |
| 354 | Heterozygous<br>PS in RH,<br>shared by DM | PGSC0003DMG40002<br>5448 | PGSC0003DMT4000<br>65440 | chr11 | NO  | NO  | GO:0005622; intracellular; Cellular Component GO:0006464; protein modification process; Biological Process GO:0016881; acid-amino acid ligase activity; Molecular Function                                                                                      |
| 355 | Heterozygous<br>PS in RH,<br>shared by DM | PGSC0003DMG40002<br>5487 | PGSC0003DMT4000<br>65512 | -     | NO  | NO  |                                                                                                                                                                                                                                                                 |

|     |                                           |                          |                          |       |     |    |                                                                                                                                                                                                                                                             |
|-----|-------------------------------------------|--------------------------|--------------------------|-------|-----|----|-------------------------------------------------------------------------------------------------------------------------------------------------------------------------------------------------------------------------------------------------------------|
| 356 | Heterozygous<br>PS in RH,<br>shared by DM | PGSC0003DMG40002<br>5489 | PGSC0003DMT4000<br>65515 | -     | NO  | NO |                                                                                                                                                                                                                                                             |
| 357 | Heterozygous<br>PS in RH,<br>shared by DM | PGSC0003DMG40002<br>5491 | PGSC0003DMT4000<br>65517 | chr04 | NO  | NO |                                                                                                                                                                                                                                                             |
| 358 | Heterozygous<br>PS in RH,<br>shared by DM | PGSC0003DMG40002<br>5586 | PGSC0003DMT4000<br>65742 | chr03 | yes | NO |                                                                                                                                                                                                                                                             |
| 359 | Heterozygous<br>PS in RH,<br>shared by DM | PGSC0003DMG40002<br>5721 | PGSC0003DMT4000<br>66070 | chr08 | yes | NO | GO:0004252; serine-type endopeptidase activity; Molecular Function<br>GO:0006508; proteolysis; Biological Process<br>GO:0042802; identical protein binding; Molecular Function<br>GO:0043086; negative regulation of catalytic activity; Biological Process |
| 360 | Heterozygous<br>PS in RH,<br>shared by DM | PGSC0003DMG40002<br>5795 | PGSC0003DMT4000<br>66337 | chr06 | yes | NO |                                                                                                                                                                                                                                                             |
| 361 | Heterozygous<br>PS in RH,<br>shared by DM | PGSC0003DMG40002<br>6188 | PGSC0003DMT4000<br>67356 | chr12 | NO  | NO |                                                                                                                                                                                                                                                             |
| 362 | Heterozygous<br>PS in RH,<br>shared by DM | PGSC0003DMG40002<br>6305 | PGSC0003DMT4000<br>67641 | chr10 | yes | NO |                                                                                                                                                                                                                                                             |
| 363 | Heterozygous<br>PS in RH,<br>shared by DM | PGSC0003DMG40002<br>6313 | PGSC0003DMT4000<br>67663 | chr08 | NO  | NO |                                                                                                                                                                                                                                                             |
| 364 | Heterozygous<br>PS in RH,<br>shared by DM | PGSC0003DMG40202<br>6387 | PGSC0003DMT4000<br>67846 | chr07 | NO  | NO | GO:0003676; nucleic acid binding; Molecular Function                                                                                                                                                                                                        |
| 365 | Heterozygous<br>PS in RH,<br>shared by DM | PGSC0003DMG40202<br>6407 | PGSC0003DMT4000<br>67900 | chr04 | NO  | NO | GO:0003676; nucleic acid binding; Molecular Function<br>GO:0008270; zinc ion binding; Molecular Function                                                                                                                                                    |
| 366 | Heterozygous<br>PS in RH,<br>shared by DM | PGSC0003DMG40002<br>6426 | PGSC0003DMT4000<br>67940 | chr11 | NO  | NO |                                                                                                                                                                                                                                                             |

|     |                                           |                          |                          |       |     |     |                                                                                                                                                         |
|-----|-------------------------------------------|--------------------------|--------------------------|-------|-----|-----|---------------------------------------------------------------------------------------------------------------------------------------------------------|
| 367 | Heterozygous<br>PS in RH,<br>shared by DM | PGSC0003DMG40002<br>6499 | PGSC0003DMT4000<br>68128 | chr05 | yes | NO  |                                                                                                                                                         |
| 368 | Heterozygous<br>PS in RH,<br>shared by DM | PGSC0003DMG40102<br>6514 | PGSC0003DMT4000<br>68174 | -     | yes | NO  | GO:0004221; ubiquitin thiolesterase<br>activity; Molecular Function<br>GO:0006511; ubiquitin-dependent protein<br>catabolic process; Biological Process |
| 369 | Heterozygous<br>PS in RH,<br>shared by DM | PGSC0003DMG40202<br>6514 | PGSC0003DMT4000<br>68172 | chr01 | yes | NO  |                                                                                                                                                         |
| 370 | Heterozygous<br>PS in RH,<br>shared by DM | PGSC0003DMG40102<br>6519 | PGSC0003DMT4000<br>68189 | chr04 | NO  | NO  |                                                                                                                                                         |
| 371 | Heterozygous<br>PS in RH,<br>shared by DM | PGSC0003DMG40002<br>6736 | PGSC0003DMT4000<br>68752 | chr10 | yes | NO  |                                                                                                                                                         |
| 372 | Heterozygous<br>PS in RH,<br>shared by DM | PGSC0003DMG40002<br>6782 | PGSC0003DMT4000<br>68861 | chr04 | NO  | NO  |                                                                                                                                                         |
| 373 | Heterozygous<br>PS in RH,<br>shared by DM | PGSC0003DMG40002<br>6819 | PGSC0003DMT4000<br>68951 | chr08 | yes | NO  |                                                                                                                                                         |
| 374 | Heterozygous<br>PS in RH,<br>shared by DM | PGSC0003DMG40002<br>6829 | PGSC0003DMT4000<br>68977 | chr06 | yes | yes | GO:0005515; protein binding; Molecular<br>Function                                                                                                      |
| 375 | Heterozygous<br>PS in RH,<br>shared by DM | PGSC0003DMG40002<br>6864 | PGSC0003DMT4000<br>69062 | chr07 | yes | yes |                                                                                                                                                         |
| 376 | Heterozygous<br>PS in RH,<br>shared by DM | PGSC0003DMG40002<br>6899 | PGSC0003DMT4000<br>69145 | chr09 | yes | yes |                                                                                                                                                         |
| 377 | Heterozygous<br>PS in RH,<br>shared by DM | PGSC0003DMG40002<br>6908 | PGSC0003DMT4000<br>69175 | chr08 | yes | NO  |                                                                                                                                                         |
| 378 | Heterozygous<br>PS in RH,<br>shared by DM | PGSC0003DMG40102<br>6931 | PGSC0003DMT4000<br>69232 | chr01 | yes | NO  |                                                                                                                                                         |

|     |                                           |                          |                          |       |     |    |                                                                                                                                                                                                                                                                                                                                                                                                                        |
|-----|-------------------------------------------|--------------------------|--------------------------|-------|-----|----|------------------------------------------------------------------------------------------------------------------------------------------------------------------------------------------------------------------------------------------------------------------------------------------------------------------------------------------------------------------------------------------------------------------------|
| 379 | Heterozygous<br>PS in RH,<br>shared by DM | PGSC0003DMG40002<br>7022 | PGSC0003DMT4000<br>69507 | chr10 | yes | NO | GO:0004672; protein kinase activity;<br>Molecular Function GO:0005515; protein<br>binding; Molecular Function<br>GO:0005524; ATP binding; Molecular<br>Function GO:0006468; protein amino acid<br>phosphorylation; Biological Process                                                                                                                                                                                  |
| 380 | Heterozygous<br>PS in RH,<br>shared by DM | PGSC0003DMG40002<br>7149 | PGSC0003DMT4000<br>69822 | chr07 | NO  | NO |                                                                                                                                                                                                                                                                                                                                                                                                                        |
| 381 | Heterozygous<br>PS in RH,<br>shared by DM | PGSC0003DMG40002<br>7183 | PGSC0003DMT4000<br>69901 | chr11 | NO  | NO |                                                                                                                                                                                                                                                                                                                                                                                                                        |
| 382 | Heterozygous<br>PS in RH,<br>shared by DM | PGSC0003DMG40002<br>7384 | PGSC0003DMT4000<br>70437 | chr07 | NO  | NO |                                                                                                                                                                                                                                                                                                                                                                                                                        |
| 383 | Heterozygous<br>PS in RH,<br>shared by DM | PGSC0003DMG40002<br>7464 | PGSC0003DMT4000<br>70649 | -     | yes | NO | GO:0004553; hydrolase activity,<br>hydrolyzing O-glycosyl compounds;<br>Molecular Function GO:0005618; cell<br>wall; Cellular Component GO:0005975;<br>carbohydrate metabolic process;<br>Biological Process GO:0006073; cellular<br>glucan metabolic process; Biological<br>Process GO:0016762;<br>xyloglucan:xyloglucosyl transferase<br>activity; Molecular Function<br>GO:0048046; apoplast; Cellular<br>Component |
| 384 | Heterozygous<br>PS in RH,<br>shared by DM | PGSC0003DMG40002<br>7465 | PGSC0003DMT4000<br>70650 | chr11 | yes | NO | GO:0004672; protein kinase activity;<br>Molecular Function GO:0005524; ATP<br>binding; Molecular Function<br>GO:0006468; protein amino acid<br>phosphorylation; Biological Process                                                                                                                                                                                                                                     |
| 385 | Heterozygous<br>PS in RH,<br>shared by DM | PGSC0003DMG40202<br>7687 | PGSC0003DMT4000<br>71195 | chr04 | NO  | NO |                                                                                                                                                                                                                                                                                                                                                                                                                        |
| 386 | Heterozygous<br>PS in RH,<br>shared by DM | PGSC0003DMG40002<br>7783 | PGSC0003DMT4000<br>71406 | chr03 | yes | NO |                                                                                                                                                                                                                                                                                                                                                                                                                        |

|     |                                           |                          |                          |       |     |     |                                                                                                                                                                                                                                                                                                                                                                                     |
|-----|-------------------------------------------|--------------------------|--------------------------|-------|-----|-----|-------------------------------------------------------------------------------------------------------------------------------------------------------------------------------------------------------------------------------------------------------------------------------------------------------------------------------------------------------------------------------------|
| 387 | Heterozygous<br>PS in RH,<br>shared by DM | PGSC0003DMG40002<br>7809 | PGSC0003DMT4000<br>71473 | chr05 | yes | yes | GO:0005634; nucleus; Cellular<br>Component                                                                                                                                                                                                                                                                                                                                          |
| 388 | Heterozygous<br>PS in RH,<br>shared by DM | PGSC0003DMG40002<br>8054 | PGSC0003DMT4000<br>72105 | chr11 | yes | NO  |                                                                                                                                                                                                                                                                                                                                                                                     |
| 389 | Heterozygous<br>PS in RH,<br>shared by DM | PGSC0003DMG40002<br>8165 | PGSC0003DMT4000<br>72375 | chr01 | yes | NO  |                                                                                                                                                                                                                                                                                                                                                                                     |
| 390 | Heterozygous<br>PS in RH,<br>shared by DM | PGSC0003DMG40002<br>8221 | PGSC0003DMT4000<br>72533 |       |     |     |                                                                                                                                                                                                                                                                                                                                                                                     |
| 391 | Heterozygous<br>PS in RH,<br>shared by DM | PGSC0003DMG40002<br>8271 | PGSC0003DMT4000<br>72655 | chr11 | yes | NO  | GO:0004497; monooxygenase activity;<br>Molecular Function GO:0005506; iron ion<br>binding; Molecular Function<br>GO:0009055; electron carrier activity;<br>Molecular Function GO:0020037; heme<br>binding; Molecular Function                                                                                                                                                       |
| 392 | Heterozygous<br>PS in RH,<br>shared by DM | PGSC0003DMG40002<br>8311 | PGSC0003DMT4000<br>72750 | chr10 | yes | yes | GO:0005643; nuclear pore; Cellular<br>Component GO:0016973; poly(A)+<br>mRNA export from nucleus; Biological<br>Process                                                                                                                                                                                                                                                             |
| 393 | Heterozygous<br>PS in RH,<br>shared by DM | PGSC0003DMG40002<br>8343 | PGSC0003DMT4000<br>72858 | chr02 | NO  | NO  | GO:0000151; ubiquitin ligase complex;<br>Cellular Component GO:0004672; protein<br>kinase activity; Molecular Function<br>GO:0004842; ubiquitin-protein ligase<br>activity; Molecular Function<br>GO:0005524; ATP binding; Molecular<br>Function GO:0006468; protein amino acid<br>phosphorylation; Biological Process<br>GO:0016567; protein ubiquitination;<br>Biological Process |
| 394 | Heterozygous<br>PS in RH,<br>shared by DM | PGSC0003DMG40002<br>8366 | PGSC0003DMT4000<br>72910 | chr01 | yes | NO  |                                                                                                                                                                                                                                                                                                                                                                                     |

|     |                                           |                          |                          |       |     |     |                                                                                                                                                                                                                               |
|-----|-------------------------------------------|--------------------------|--------------------------|-------|-----|-----|-------------------------------------------------------------------------------------------------------------------------------------------------------------------------------------------------------------------------------|
| 395 | Heterozygous<br>PS in RH,<br>shared by DM | PGSC0003DMG40002<br>8373 | PGSC0003DMT4000<br>72928 | chr11 | yes | NO  | GO:0004497; monooxygenase activity;<br>Molecular Function GO:0005506; iron ion<br>binding; Molecular Function<br>GO:0009055; electron carrier activity;<br>Molecular Function GO:0020037; heme<br>binding; Molecular Function |
| 396 | Heterozygous<br>PS in RH,<br>shared by DM | PGSC0003DMG40002<br>8405 | PGSC0003DMT4000<br>73019 | chr06 | NO  | NO  |                                                                                                                                                                                                                               |
| 397 | Heterozygous<br>PS in RH,<br>shared by DM | PGSC0003DMG40002<br>8473 | PGSC0003DMT4000<br>73277 | chr04 | yes | NO  |                                                                                                                                                                                                                               |
| 398 | Heterozygous<br>PS in RH,<br>shared by DM | PGSC0003DMG40002<br>8493 | PGSC0003DMT4000<br>73320 | chr02 | yes | NO  |                                                                                                                                                                                                                               |
| 399 | Heterozygous<br>PS in RH,<br>shared by DM | PGSC0003DMG40002<br>8706 | PGSC0003DMT4000<br>73876 | -     | yes | yes |                                                                                                                                                                                                                               |
| 400 | Heterozygous<br>PS in RH,<br>shared by DM | PGSC0003DMG40002<br>8825 | PGSC0003DMT4000<br>74161 | chr08 | NO  | NO  |                                                                                                                                                                                                                               |
| 401 | Heterozygous<br>PS in RH,<br>shared by DM | PGSC0003DMG40002<br>8833 | PGSC0003DMT4000<br>74187 | chr02 | yes | NO  |                                                                                                                                                                                                                               |
| 402 | Heterozygous<br>PS in RH,<br>shared by DM | PGSC0003DMG40002<br>8846 | PGSC0003DMT4000<br>74230 | chr02 | NO  | NO  |                                                                                                                                                                                                                               |
| 403 | Heterozygous<br>PS in RH,<br>shared by DM | PGSC0003DMG40002<br>8898 | PGSC0003DMT4000<br>74348 | -     | NO  | NO  |                                                                                                                                                                                                                               |
| 404 | Heterozygous<br>PS in RH,<br>shared by DM | PGSC0003DMG40002<br>8958 | PGSC0003DMT4000<br>74506 | chr04 | NO  | NO  |                                                                                                                                                                                                                               |
| 405 | Heterozygous<br>PS in RH,<br>shared by DM | PGSC0003DMG40002<br>9178 | PGSC0003DMT4000<br>75018 | chr06 | NO  | NO  |                                                                                                                                                                                                                               |

|     |                                           |                          |                          |       |     |     |                                                                                                                                                                            |
|-----|-------------------------------------------|--------------------------|--------------------------|-------|-----|-----|----------------------------------------------------------------------------------------------------------------------------------------------------------------------------|
| 406 | Heterozygous<br>PS in RH,<br>shared by DM | PGSC0003DMG40002<br>9192 | PGSC0003DMT4000<br>75052 | chr07 | yes | NO  |                                                                                                                                                                            |
| 407 | Heterozygous<br>PS in RH,<br>shared by DM | PGSC0003DMG40002<br>9193 | PGSC0003DMT4000<br>75055 | chr06 | NO  | NO  |                                                                                                                                                                            |
| 408 | Heterozygous<br>PS in RH,<br>shared by DM | PGSC0003DMG40002<br>9301 | PGSC0003DMT4000<br>75342 | chr05 | NO  | NO  |                                                                                                                                                                            |
| 409 | Heterozygous<br>PS in RH,<br>shared by DM | PGSC0003DMG40002<br>9342 | PGSC0003DMT4000<br>75431 | chr08 | yes | NO  |                                                                                                                                                                            |
| 410 | Heterozygous<br>PS in RH,<br>shared by DM | PGSC0003DMG40002<br>9360 | PGSC0003DMT4000<br>75504 | chr12 | yes | NO  |                                                                                                                                                                            |
| 411 | Heterozygous<br>PS in RH,<br>shared by DM | PGSC0003DMG40002<br>9382 | PGSC0003DMT4000<br>75558 | chr06 | NO  | NO  | GO:0005622; intracellular; Cellular Component GO:0006464; protein modification process; Biological Process GO:0016881; acid-amino acid ligase activity; Molecular Function |
| 412 | Heterozygous<br>PS in RH,<br>shared by DM | PGSC0003DMG40002<br>9495 | PGSC0003DMT4000<br>75862 | -     | yes | yes | GO:0005515; protein binding; Molecular Function                                                                                                                            |
| 413 | Heterozygous<br>PS in RH,<br>shared by DM | PGSC0003DMG40002<br>9584 | PGSC0003DMT4000<br>76080 | chr01 | yes | NO  | GO:0004857; enzyme inhibitor activity; Molecular Function GO:0030599; pectinesterase activity; Molecular Function                                                          |
| 414 | Heterozygous<br>PS in RH,<br>shared by DM | PGSC0003DMG40002<br>9819 | PGSC0003DMT4000<br>76675 | -     | yes | NO  |                                                                                                                                                                            |
| 415 | Heterozygous<br>PS in RH,<br>shared by DM | PGSC0003DMG40003<br>0041 | PGSC0003DMT4000<br>77234 | chr05 | yes | NO  | GO:0004672; protein kinase activity; Molecular Function GO:0005524; ATP binding; Molecular Function GO:0006468; protein amino acid phosphorylation; Biological Process     |
| 416 | Heterozygous<br>PS in RH,<br>shared by DM | PGSC0003DMG40003<br>0092 | PGSC0003DMT4000<br>77364 | chr01 | yes | NO  |                                                                                                                                                                            |

|     |                                           |                          |                          |       |     |     |                                                                                                                                                                                    |
|-----|-------------------------------------------|--------------------------|--------------------------|-------|-----|-----|------------------------------------------------------------------------------------------------------------------------------------------------------------------------------------|
| 417 | Heterozygous<br>PS in RH,<br>shared by DM | PGSC0003DMG40003<br>0219 | PGSC0003DMT4000<br>77668 | chr08 | yes | NO  |                                                                                                                                                                                    |
| 418 | Heterozygous<br>PS in RH,<br>shared by DM | PGSC0003DMG40003<br>0267 | PGSC0003DMT4000<br>77806 | chr06 | yes | yes |                                                                                                                                                                                    |
| 419 | Heterozygous<br>PS in RH,<br>shared by DM | PGSC0003DMG40003<br>0314 | PGSC0003DMT4000<br>77944 | chr01 | yes | NO  |                                                                                                                                                                                    |
| 420 | Heterozygous<br>PS in RH,<br>shared by DM | PGSC0003DMG40003<br>0335 | PGSC0003DMT4000<br>77996 | chr08 | NO  | NO  | GO:0006355; regulation of transcription,<br>DNA-dependent; Biological Process                                                                                                      |
| 421 | Heterozygous<br>PS in RH,<br>shared by DM | PGSC0003DMG40003<br>0367 | PGSC0003DMT4000<br>78071 | chr10 | NO  | NO  |                                                                                                                                                                                    |
| 422 | Heterozygous<br>PS in RH,<br>shared by DM | PGSC0003DMG40003<br>0371 | PGSC0003DMT4000<br>78084 | chr08 | NO  | NO  |                                                                                                                                                                                    |
| 423 | Heterozygous<br>PS in RH,<br>shared by DM | PGSC0003DMG40003<br>0411 | PGSC0003DMT4000<br>78175 | chr08 | yes | NO  | GO:0005515; protein binding; Molecular<br>Function GO:0005524; ATP binding;<br>Molecular Function GO:0006915;<br>apoptosis; Biological Process                                     |
| 424 | Heterozygous<br>PS in RH,<br>shared by DM | PGSC0003DMG40003<br>0413 | PGSC0003DMT4000<br>78178 | chr05 | yes | yes | GO:0004672; protein kinase activity;<br>Molecular Function GO:0005524; ATP<br>binding; Molecular Function<br>GO:0006468; protein amino acid<br>phosphorylation; Biological Process |
| 425 | Heterozygous<br>PS in RH,<br>shared by DM | PGSC0003DMG40003<br>0465 | PGSC0003DMT4000<br>78274 | chr07 | yes | NO  |                                                                                                                                                                                    |
| 426 | Heterozygous<br>PS in RH,<br>shared by DM | PGSC0003DMG40003<br>0508 | PGSC0003DMT4000<br>78357 | chr09 | yes | yes | GO:0004553; hydrolase activity,<br>hydrolyzing O-glycosyl compounds;<br>Molecular Function GO:0005975;<br>carbohydrate metabolic process;<br>Biological Process                    |



|     |                                           |                          |                          |       |     |     |                                                                                                                                                                                                                                                                                                                                                                                                                        |
|-----|-------------------------------------------|--------------------------|--------------------------|-------|-----|-----|------------------------------------------------------------------------------------------------------------------------------------------------------------------------------------------------------------------------------------------------------------------------------------------------------------------------------------------------------------------------------------------------------------------------|
| 427 | Heterozygous<br>PS in RH,<br>shared by DM | PGSC0003DMG40003<br>0542 | PGSC0003DMT4000<br>78463 | chr04 | yes | NO  | GO:0004497; monooxygenase activity;<br>Molecular Function GO:0005506; iron ion<br>binding; Molecular Function<br>GO:0009055; electron carrier activity;<br>Molecular Function GO:0020037; heme<br>binding; Molecular Function                                                                                                                                                                                          |
| 428 | Heterozygous<br>PS in RH,<br>shared by DM | PGSC0003DMG40003<br>0558 | PGSC0003DMT4000<br>78502 | chr06 | yes | NO  |                                                                                                                                                                                                                                                                                                                                                                                                                        |
| 429 | Heterozygous<br>PS in RH,<br>shared by DM | PGSC0003DMG40003<br>0622 | PGSC0003DMT4000<br>78698 | chr11 | yes | yes | GO:0004553; hydrolase activity,<br>hydrolyzing O-glycosyl compounds;<br>Molecular Function GO:0005618; cell<br>wall; Cellular Component GO:0005975;<br>carbohydrate metabolic process;<br>Biological Process GO:0006073; cellular<br>glucan metabolic process; Biological<br>Process GO:0016762;<br>xyloglucan:xyloglucosyl transferase<br>activity; Molecular Function<br>GO:0048046; apoplast; Cellular<br>Component |
| 430 | Heterozygous<br>PS in RH,<br>shared by DM | PGSC0003DMG40003<br>0745 | PGSC0003DMT4000<br>79001 | chr12 | yes | NO  |                                                                                                                                                                                                                                                                                                                                                                                                                        |
| 431 | Heterozygous<br>PS in RH,<br>shared by DM | PGSC0003DMG40003<br>0794 | PGSC0003DMT4000<br>79121 | -     | yes | yes |                                                                                                                                                                                                                                                                                                                                                                                                                        |
| 432 | Heterozygous<br>PS in RH,<br>shared by DM | PGSC0003DMG40003<br>0801 | PGSC0003DMT4000<br>79138 | chr12 | NO  | NO  |                                                                                                                                                                                                                                                                                                                                                                                                                        |
| 433 | Heterozygous<br>PS in RH,<br>shared by DM | PGSC0003DMG40003<br>0855 | PGSC0003DMT4000<br>79272 | chr04 | yes | yes |                                                                                                                                                                                                                                                                                                                                                                                                                        |
| 434 | Heterozygous<br>PS in RH,<br>shared by DM | PGSC0003DMG40003<br>0904 | PGSC0003DMT4000<br>79392 | chr02 | yes | NO  |                                                                                                                                                                                                                                                                                                                                                                                                                        |

|     |                                           |                          |                          |       |     |     |                                                                                                                                                                                                                                                                                                       |
|-----|-------------------------------------------|--------------------------|--------------------------|-------|-----|-----|-------------------------------------------------------------------------------------------------------------------------------------------------------------------------------------------------------------------------------------------------------------------------------------------------------|
| 435 | Heterozygous<br>PS in RH,<br>shared by DM | PGSC0003DMG40203<br>0921 | PGSC0003DMT4000<br>79432 | chr09 | yes | NO  |                                                                                                                                                                                                                                                                                                       |
| 436 | Heterozygous<br>PS in RH,<br>shared by DM | PGSC0003DMG40003<br>0968 | PGSC0003DMT4000<br>79535 | chr09 | yes | yes |                                                                                                                                                                                                                                                                                                       |
| 437 | Heterozygous<br>PS in RH,<br>shared by DM | PGSC0003DMG40003<br>1039 | PGSC0003DMT4000<br>79690 | chr05 | NO  | NO  |                                                                                                                                                                                                                                                                                                       |
| 438 | Heterozygous<br>PS in RH,<br>shared by DM | PGSC0003DMG40003<br>1087 | PGSC0003DMT4000<br>79832 | -     | yes | NO  |                                                                                                                                                                                                                                                                                                       |
| 439 | Heterozygous<br>PS in RH,<br>shared by DM | PGSC0003DMG40103<br>1089 | PGSC0003DMT4000<br>79836 | chr09 | yes | NO  | GO:0004672; protein kinase activity;<br>Molecular Function GO:0005524; ATP<br>binding; Molecular Function<br>GO:0006468; protein amino acid<br>phosphorylation; Biological Process                                                                                                                    |
| 440 | Heterozygous<br>PS in RH,<br>shared by DM | PGSC0003DMG40003<br>1095 | PGSC0003DMT4000<br>79843 | -     | yes | yes | GO:0004888; transmembrane receptor<br>activity; Molecular Function<br>GO:0005515; protein binding; Molecular<br>Function GO:0007165; signal<br>transduction; Biological Process<br>GO:0031224; intrinsic to membrane;<br>Cellular Component GO:0045087; innate<br>immune response; Biological Process |
| 441 | Heterozygous<br>PS in RH,<br>shared by DM | PGSC0003DMG40003<br>1153 | PGSC0003DMT4000<br>80005 | -     | NO  | NO  |                                                                                                                                                                                                                                                                                                       |
| 442 | Heterozygous<br>PS in RH,<br>shared by DM | PGSC0003DMG40003<br>1184 | PGSC0003DMT4000<br>80083 | -     | yes | NO  | GO:0004221; ubiquitin thiolesterase<br>activity; Molecular Function<br>GO:0006511; ubiquitin-dependent protein<br>catabolic process; Biological Process                                                                                                                                               |
| 443 | Heterozygous<br>PS in RH,<br>shared by DM | PGSC0003DMG40003<br>1190 | PGSC0003DMT4000<br>80102 | chr05 | yes | NO  | GO:0004672; protein kinase activity;<br>Molecular Function GO:0005524; ATP<br>binding; Molecular Function<br>GO:0006468; protein amino acid<br>phosphorylation; Biological Process                                                                                                                    |

|     |                                           |                          |                          |       |     |     |                                                                                                                                                                                                                                                                                                                                                                                                                 |
|-----|-------------------------------------------|--------------------------|--------------------------|-------|-----|-----|-----------------------------------------------------------------------------------------------------------------------------------------------------------------------------------------------------------------------------------------------------------------------------------------------------------------------------------------------------------------------------------------------------------------|
| 444 | Heterozygous<br>PS in RH,<br>shared by DM | PGSC0003DMG40003<br>1214 | PGSC0003DMT4000<br>80182 | chr02 | yes | NO  | GO:0003676; nucleic acid binding;<br>Molecular Function                                                                                                                                                                                                                                                                                                                                                         |
| 445 | Heterozygous<br>PS in RH,<br>shared by DM | PGSC0003DMG40203<br>1251 | PGSC0003DMT4000<br>80283 | chr02 | NO  | NO  |                                                                                                                                                                                                                                                                                                                                                                                                                 |
| 446 | Heterozygous<br>PS in RH,<br>shared by DM | PGSC0003DMG40003<br>1320 | PGSC0003DMT4000<br>80445 | -     | NO  | NO  |                                                                                                                                                                                                                                                                                                                                                                                                                 |
| 447 | Heterozygous<br>PS in RH,<br>shared by DM | PGSC0003DMG40003<br>1333 | PGSC0003DMT4000<br>80479 | chr03 | NO  | NO  |                                                                                                                                                                                                                                                                                                                                                                                                                 |
| 448 | Heterozygous<br>PS in RH,<br>shared by DM | PGSC0003DMG40003<br>1437 | PGSC0003DMT4000<br>80723 | chr07 | yes | yes |                                                                                                                                                                                                                                                                                                                                                                                                                 |
| 449 | Heterozygous<br>PS in RH,<br>shared by DM | PGSC0003DMG40003<br>1491 | PGSC0003DMT4000<br>80864 | chr07 | NO  | NO  |                                                                                                                                                                                                                                                                                                                                                                                                                 |
| 450 | Heterozygous<br>PS in RH,<br>shared by DM | PGSC0003DMG40003<br>1746 | PGSC0003DMT4000<br>81216 | chr10 | yes | NO  |                                                                                                                                                                                                                                                                                                                                                                                                                 |
| 451 | Heterozygous<br>PS in RH,<br>shared by DM | PGSC0003DMG40003<br>1896 | PGSC0003DMT4000<br>81515 | chr12 | yes | NO  | GO:0009772; photosynthetic electron<br>transport in photosystem II; Biological<br>Process GO:0019684; photosynthesis,<br>light reaction; Biological Process<br>GO:0030077; plasma membrane light-<br>harvesting complex; Cellular Component<br>GO:0045156; electron transporter,<br>transferring electrons within the cyclic<br>electron transport pathway of<br>photosynthesis activity; Molecular<br>Function |
| 452 | Heterozygous<br>PS in RH,<br>shared by DM | PGSC0003DMG40103<br>2161 | PGSC0003DMT4000<br>81926 |       |     |     |                                                                                                                                                                                                                                                                                                                                                                                                                 |
| 453 | Heterozygous<br>PS in RH,<br>shared by DM | PGSC0003DMG40003<br>2554 | PGSC0003DMT4000<br>82469 | chr06 | NO  | NO  | GO:0005525; GTP binding; Molecular<br>Function                                                                                                                                                                                                                                                                                                                                                                  |

|     |                                           |                          |                          |       |     |     |                                                                                                                                                                                                                                                                      |
|-----|-------------------------------------------|--------------------------|--------------------------|-------|-----|-----|----------------------------------------------------------------------------------------------------------------------------------------------------------------------------------------------------------------------------------------------------------------------|
| 454 | Heterozygous<br>PS in RH,<br>shared by DM | PGSC0003DMG40003<br>2573 | PGSC0003DMT4000<br>82496 | chr10 | NO  | NO  |                                                                                                                                                                                                                                                                      |
| 455 | Heterozygous<br>PS in RH,<br>shared by DM | PGSC0003DMG40003<br>2773 | PGSC0003DMT4000<br>82703 | chr02 | yes | NO  |                                                                                                                                                                                                                                                                      |
| 456 | Heterozygous<br>PS in RH,<br>shared by DM | PGSC0003DMG40003<br>2817 | PGSC0003DMT4000<br>82789 | chr01 | yes | NO  |                                                                                                                                                                                                                                                                      |
| 457 | Heterozygous<br>PS in RH,<br>shared by DM | PGSC0003DMG40003<br>3056 | PGSC0003DMT4000<br>83108 | chr08 | yes | NO  |                                                                                                                                                                                                                                                                      |
| 458 | Heterozygous<br>PS in RH,<br>shared by DM | PGSC0003DMG40003<br>3567 | PGSC0003DMT4000<br>83733 | chr04 | yes | NO  | GO:0005215; transporter activity;<br>Molecular Function GO:0006810;<br>transport; Biological Process<br>GO:0016020; membrane; Cellular<br>Component GO:0055085; transmembrane<br>transport; Biological Process                                                       |
| 459 | Heterozygous<br>PS in RH,<br>shared by DM | PGSC0003DMG40103<br>4311 | PGSC0003DMT4000<br>84735 | chr06 | NO  | NO  |                                                                                                                                                                                                                                                                      |
| 460 | Heterozygous<br>PS in RH,<br>shared by DM | PGSC0003DMG40003<br>4328 | PGSC0003DMT4000<br>84757 | chr12 | yes | yes |                                                                                                                                                                                                                                                                      |
| 461 | Heterozygous<br>PS in RH,<br>shared by DM | PGSC0003DMG40003<br>4440 | PGSC0003DMT4000<br>84869 | chr08 | yes | yes | GO:0004252; serine-type endopeptidase<br>activity; Molecular Function<br>GO:0006508; proteolysis; Biological<br>Process GO:0042802; identical protein<br>binding; Molecular Function<br>GO:0043086; negative regulation of<br>catalytic activity; Biological Process |
| 462 | Heterozygous<br>PS in RH,<br>shared by DM | PGSC0003DMG40003<br>4479 | PGSC0003DMT4000<br>84908 | chr11 | yes | yes |                                                                                                                                                                                                                                                                      |

|     |                                           |                          |                          |       |     |    |                                                                                                                                                                                                                                                                                                                                       |
|-----|-------------------------------------------|--------------------------|--------------------------|-------|-----|----|---------------------------------------------------------------------------------------------------------------------------------------------------------------------------------------------------------------------------------------------------------------------------------------------------------------------------------------|
| 463 | Heterozygous<br>PS in RH,<br>shared by DM | PGSC0003DMG40003<br>4550 | PGSC0003DMT4000<br>84979 | chr03 | NO  | NO | GO:0000166; nucleotide binding;<br>Molecular Function GO:0004813; alanine-<br>tRNA ligase activity; Molecular Function<br>GO:0005524; ATP binding; Molecular<br>Function GO:0005737; cytoplasm;<br>Cellular Component GO:0006412;<br>translation; Biological Process<br>GO:0006419; alanyl-tRNA<br>aminoacylation; Biological Process |
| 464 | Heterozygous<br>PS in RH,<br>shared by DM | PGSC0003DMG40003<br>4551 | PGSC0003DMT4000<br>84980 | chr09 | yes | NO |                                                                                                                                                                                                                                                                                                                                       |
| 465 | Heterozygous<br>PS in RH,<br>shared by DM | PGSC0003DMG40003<br>4552 | PGSC0003DMT4000<br>84981 | chr06 | NO  | NO | GO:0004497; monooxygenase activity;<br>Molecular Function GO:0005506; iron ion<br>binding; Molecular Function<br>GO:0009055; electron carrier activity;<br>Molecular Function GO:0020037; heme<br>binding; Molecular Function                                                                                                         |
| 466 | Heterozygous<br>PS in RH,<br>shared by DM | PGSC0003DMG40003<br>4599 | PGSC0003DMT4000<br>85028 | chr11 | yes | NO |                                                                                                                                                                                                                                                                                                                                       |
| 467 | Heterozygous<br>PS in RH,<br>shared by DM | PGSC0003DMG40003<br>4600 | PGSC0003DMT4000<br>85029 | chr09 | NO  | NO |                                                                                                                                                                                                                                                                                                                                       |
| 468 | Heterozygous<br>PS in RH,<br>shared by DM | PGSC0003DMG40003<br>4646 | PGSC0003DMT4000<br>85075 | chr11 | yes | NO |                                                                                                                                                                                                                                                                                                                                       |
| 469 | Heterozygous<br>PS in RH,<br>shared by DM | PGSC0003DMG40003<br>4693 | PGSC0003DMT4000<br>85122 | chr06 | NO  | NO | GO:0004497; monooxygenase activity;<br>Molecular Function GO:0005506; iron ion<br>binding; Molecular Function<br>GO:0009055; electron carrier activity;<br>Molecular Function GO:0020037; heme<br>binding; Molecular Function                                                                                                         |
| 470 | Heterozygous<br>PS in RH,<br>shared by DM | PGSC0003DMG40003<br>4716 | PGSC0003DMT4000<br>85145 | chr04 | NO  | NO |                                                                                                                                                                                                                                                                                                                                       |

|     |                                           |                          |                          |       |     |     |                                                                                                                                                                                                                       |
|-----|-------------------------------------------|--------------------------|--------------------------|-------|-----|-----|-----------------------------------------------------------------------------------------------------------------------------------------------------------------------------------------------------------------------|
| 471 | Heterozygous<br>PS in RH,<br>shared by DM | PGSC0003DMG40003<br>4729 | PGSC0003DMT4000<br>85158 | -     | NO  | NO  | GO:0009058; biosynthetic process;<br>Biological Process GO:0016769;<br>transferase activity, transferring<br>nitrogenous groups; Molecular Function<br>GO:0030170; pyridoxal phosphate<br>binding; Molecular Function |
| 472 | Heterozygous<br>PS in RH,<br>shared by DM | PGSC0003DMG40003<br>4956 | PGSC0003DMT4000<br>85385 | chr09 | NO  | NO  | GO:0005097; Rab GTPase activator<br>activity; Molecular Function<br>GO:0005622; intracellular; Cellular<br>Component GO:0032313; regulation of<br>Rab GTPase activity; Biological Process                             |
| 473 | Heterozygous<br>PS in RH,<br>shared by DM | PGSC0003DMG40003<br>5099 | PGSC0003DMT4000<br>85528 | chr12 | NO  | NO  |                                                                                                                                                                                                                       |
| 474 | Heterozygous<br>PS in RH,<br>shared by DM | PGSC0003DMG40003<br>5120 | PGSC0003DMT4000<br>85549 | chr03 | yes | NO  | GO:0003735; structural constituent of<br>ribosome; Molecular Function<br>GO:0005622; intracellular; Cellular<br>Component GO:0005840; ribosome;<br>Cellular Component GO:0006412;<br>translation; Biological Process  |
| 475 | Heterozygous<br>PS in RH,<br>shared by DM | PGSC0003DMG40003<br>5390 | PGSC0003DMT4000<br>85819 | chr12 | NO  | NO  |                                                                                                                                                                                                                       |
| 476 | Heterozygous<br>PS in RH,<br>shared by DM | PGSC0003DMG40003<br>5433 | PGSC0003DMT4000<br>85862 | chr07 | yes | NO  | GO:0003723; RNA binding; Molecular<br>Function GO:0033897; ribonuclease T2<br>activity; Molecular Function                                                                                                            |
| 477 | Heterozygous<br>PS in RH,<br>shared by DM | PGSC0003DMG40003<br>5452 | PGSC0003DMT4000<br>85881 | chr08 | NO  | NO  |                                                                                                                                                                                                                       |
| 478 | Heterozygous<br>PS in RH,<br>shared by DM | PGSC0003DMG40003<br>5508 | PGSC0003DMT4000<br>85937 | chr07 | yes | NO  |                                                                                                                                                                                                                       |
| 479 | Heterozygous<br>PS in RH,<br>shared by DM | PGSC0003DMG40003<br>5534 | PGSC0003DMT4000<br>85963 | chr10 | yes | yes |                                                                                                                                                                                                                       |

|     |                                           |                          |                          |       |     |     |                                                                                                                                                                                                                                                  |
|-----|-------------------------------------------|--------------------------|--------------------------|-------|-----|-----|--------------------------------------------------------------------------------------------------------------------------------------------------------------------------------------------------------------------------------------------------|
| 480 | Heterozygous<br>PS in RH,<br>shared by DM | PGSC0003DMG40003<br>5552 | PGSC0003DMT4000<br>85981 | chr12 | yes | yes | GO:0003723; RNA binding; Molecular Function GO:0003964; RNA-directed DNA polymerase activity; Molecular Function GO:0006278; RNA-dependent DNA replication; Biological Process                                                                   |
| 481 | Heterozygous<br>PS in RH,<br>shared by DM | PGSC0003DMG40003<br>5668 | PGSC0003DMT4000<br>86097 | -     | NO  | NO  |                                                                                                                                                                                                                                                  |
| 482 | Heterozygous<br>PS in RH,<br>shared by DM | PGSC0003DMG40003<br>5669 | PGSC0003DMT4000<br>86098 | chr12 | NO  | NO  |                                                                                                                                                                                                                                                  |
| 483 | Heterozygous<br>PS in RH,<br>shared by DM | PGSC0003DMG40003<br>5682 | PGSC0003DMT4000<br>86111 | chr07 | yes | NO  | GO:0000148; 1,3-beta-glucan synthase complex; Cellular Component GO:0003843; 1,3-beta-glucan synthase activity; Molecular Function GO:0006075; 1,3-beta-glucan biosynthetic process; Biological Process GO:0016020; membrane; Cellular Component |
| 484 | Heterozygous<br>PS in RH,<br>shared by DM | PGSC0003DMG40003<br>5713 | PGSC0003DMT4000<br>86142 | chr01 | yes | yes | GO:0004713; protein tyrosine kinase activity; Molecular Function GO:0005515; protein binding; Molecular Function GO:0005524; ATP binding; Molecular Function GO:0006468; protein amino acid phosphorylation; Biological Process                  |
| 485 | Heterozygous<br>PS in RH,<br>shared by DM | PGSC0003DMG40003<br>5714 | PGSC0003DMT4000<br>86143 | chr11 | yes | NO  |                                                                                                                                                                                                                                                  |
| 486 | Heterozygous<br>PS in RH,<br>shared by DM | PGSC0003DMG40003<br>5810 | PGSC0003DMT4000<br>86239 | chr08 | NO  | NO  | GO:0003676; nucleic acid binding; Molecular Function GO:0008270; zinc ion binding; Molecular Function                                                                                                                                            |
| 487 | Heterozygous<br>PS in RH,<br>shared by DM | PGSC0003DMG40003<br>6064 | PGSC0003DMT4000<br>86493 |       |     |     |                                                                                                                                                                                                                                                  |
| 488 | Heterozygous<br>PS in RH,<br>shared by DM | PGSC0003DMG40003<br>6133 | PGSC0003DMT4000<br>86562 | chr06 | yes | yes |                                                                                                                                                                                                                                                  |

|     |                                           |                          |                          |       |     |     |                                                                                                                             |
|-----|-------------------------------------------|--------------------------|--------------------------|-------|-----|-----|-----------------------------------------------------------------------------------------------------------------------------|
| 489 | Heterozygous<br>PS in RH,<br>shared by DM | PGSC0003DMG40003<br>6165 | PGSC0003DMT4000<br>86594 | chr01 | yes | NO  |                                                                                                                             |
| 490 | Heterozygous<br>PS in RH,<br>shared by DM | PGSC0003DMG40003<br>6305 | PGSC0003DMT4000<br>86734 | chr08 | NO  | NO  |                                                                                                                             |
| 491 | Heterozygous<br>PS in RH,<br>shared by DM | PGSC0003DMG40003<br>6369 | PGSC0003DMT4000<br>86798 | chr12 | yes | NO  | GO:0005515; protein binding; Molecular<br>Function                                                                          |
| 492 | Heterozygous<br>PS in RH,<br>shared by DM | PGSC0003DMG40003<br>6554 | PGSC0003DMT4000<br>86983 | chr01 | yes | NO  | GO:0005515; protein binding; Molecular<br>Function                                                                          |
| 493 | Heterozygous<br>PS in RH,<br>shared by DM | PGSC0003DMG40003<br>6575 | PGSC0003DMT4000<br>87004 | chr12 | yes | NO  |                                                                                                                             |
| 494 | Heterozygous<br>PS in RH,<br>shared by DM | PGSC0003DMG40003<br>6743 | PGSC0003DMT4000<br>87172 | chr11 | yes | NO  |                                                                                                                             |
| 495 | Heterozygous<br>PS in RH,<br>shared by DM | PGSC0003DMG40003<br>6747 | PGSC0003DMT4000<br>87176 | chr01 | yes | NO  | GO:0003677; DNA binding; Molecular<br>Function GO:0046983; protein<br>dimerization activity; Molecular Function             |
| 496 | Heterozygous<br>PS in RH,<br>shared by DM | PGSC0003DMG40003<br>7031 | PGSC0003DMT4000<br>87460 | chr02 | NO  | NO  |                                                                                                                             |
| 497 | Heterozygous<br>PS in RH,<br>shared by DM | PGSC0003DMG40003<br>7103 | PGSC0003DMT4000<br>87532 | chr10 | yes | yes | GO:0005634; nucleus; Cellular<br>Component                                                                                  |
| 498 | Heterozygous<br>PS in RH,<br>shared by DM | PGSC0003DMG40003<br>7161 | PGSC0003DMT4000<br>87590 |       |     |     |                                                                                                                             |
| 499 | Heterozygous<br>PS in RH,<br>shared by DM | PGSC0003DMG40003<br>7398 | PGSC0003DMT4000<br>87827 | chr06 | yes | NO  |                                                                                                                             |
| 500 | Heterozygous<br>PS in RH,<br>shared by DM | PGSC0003DMG40003<br>7517 | PGSC0003DMT4000<br>87946 | chr10 | NO  | NO  | GO:0005634; nucleus; Cellular<br>Component GO:0006355; regulation of<br>transcription, DNA-dependent; Biological<br>Process |



|     |                                           |                          |                          |       |     |     |                                                                                                                                                                                    |
|-----|-------------------------------------------|--------------------------|--------------------------|-------|-----|-----|------------------------------------------------------------------------------------------------------------------------------------------------------------------------------------|
| 501 | Heterozygous<br>PS in RH,<br>shared by DM | PGSC0003DMG40003<br>7571 | PGSC0003DMT4000<br>88000 | chr03 | yes | yes |                                                                                                                                                                                    |
| 502 | Heterozygous<br>PS in RH,<br>shared by DM | PGSC0003DMG40003<br>7583 | PGSC0003DMT4000<br>88012 | chr02 | NO  | NO  |                                                                                                                                                                                    |
| 503 | Heterozygous<br>PS in RH,<br>shared by DM | PGSC0003DMG40003<br>7616 | PGSC0003DMT4000<br>88045 | chr12 | yes | NO  |                                                                                                                                                                                    |
| 504 | Heterozygous<br>PS in RH,<br>shared by DM | PGSC0003DMG40003<br>7735 | PGSC0003DMT4000<br>88164 | chr03 | yes | NO  | GO:0016787; hydrolase activity;<br>Molecular Function                                                                                                                              |
| 505 | Heterozygous<br>PS in RH,<br>shared by DM | PGSC0003DMG40003<br>7910 | PGSC0003DMT4000<br>88339 | -     | NO  | NO  |                                                                                                                                                                                    |
| 506 | Heterozygous<br>PS in RH,<br>shared by DM | PGSC0003DMG40003<br>8095 | PGSC0003DMT4000<br>88524 | chr05 | NO  | NO  |                                                                                                                                                                                    |
| 507 | Heterozygous<br>PS in RH,<br>shared by DM | PGSC0003DMG40003<br>8218 | PGSC0003DMT4000<br>88647 | chr07 | NO  | NO  |                                                                                                                                                                                    |
| 508 | Heterozygous<br>PS in RH,<br>shared by DM | PGSC0003DMG40003<br>8416 | PGSC0003DMT4000<br>88845 | chr11 | yes | NO  |                                                                                                                                                                                    |
| 509 | Heterozygous<br>PS in RH,<br>shared by DM | PGSC0003DMG40003<br>8427 | PGSC0003DMT4000<br>88856 | chr04 | NO  | NO  |                                                                                                                                                                                    |
| 510 | Heterozygous<br>PS in RH,<br>shared by DM | PGSC0003DMG40003<br>8523 | PGSC0003DMT4000<br>88952 | chr05 | yes | NO  |                                                                                                                                                                                    |
| 511 | Heterozygous<br>PS in RH,<br>shared by DM | PGSC0003DMG40003<br>8582 | PGSC0003DMT4000<br>89011 | chr06 | yes | NO  | GO:0004672; protein kinase activity;<br>Molecular Function GO:0005524; ATP<br>binding; Molecular Function<br>GO:0006468; protein amino acid<br>phosphorylation; Biological Process |
| 512 | Heterozygous<br>PS in RH,<br>shared by DM | PGSC0003DMG40003<br>8650 | PGSC0003DMT4000<br>89079 | chr12 | yes | NO  |                                                                                                                                                                                    |

|     |                                           |                          |                          |       |     |     |                                                                                                                                                               |
|-----|-------------------------------------------|--------------------------|--------------------------|-------|-----|-----|---------------------------------------------------------------------------------------------------------------------------------------------------------------|
| 513 | Heterozygous<br>PS in RH,<br>shared by DM | PGSC0003DMG40003<br>8651 | PGSC0003DMT4000<br>89080 | chr06 | NO  | NO  |                                                                                                                                                               |
| 514 | Heterozygous<br>PS in RH,<br>shared by DM | PGSC0003DMG40003<br>8758 | PGSC0003DMT4000<br>89187 | chr01 | yes | NO  | GO:0016747; transferase activity,<br>transferring acyl groups other than amino-<br>acyl groups; Molecular Function                                            |
| 515 | Heterozygous<br>PS in RH,<br>shared by DM | PGSC0003DMG40003<br>8842 | PGSC0003DMT4000<br>89271 |       |     |     |                                                                                                                                                               |
| 516 | Heterozygous<br>PS in RH,<br>shared by DM | PGSC0003DMG40003<br>8843 | PGSC0003DMT4000<br>89272 |       |     |     |                                                                                                                                                               |
| 517 | Heterozygous<br>PS in RH,<br>shared by DM | PGSC0003DMG40003<br>9007 | PGSC0003DMT4000<br>89436 | chr12 | yes | NO  |                                                                                                                                                               |
| 518 | Heterozygous<br>PS in RH,<br>shared by DM | PGSC0003DMG40003<br>9067 | PGSC0003DMT4000<br>89496 | chr01 | NO  | NO  | GO:0004177; aminopeptidase activity;<br>Molecular Function GO:0005622;<br>intracellular; Cellular Component<br>GO:0006508; proteolysis; Biological<br>Process |
| 519 | Heterozygous<br>PS in RH,<br>shared by DM | PGSC0003DMG40003<br>9155 | PGSC0003DMT4000<br>89584 | chr05 | NO  | NO  |                                                                                                                                                               |
| 520 | Heterozygous<br>PS in RH,<br>shared by DM | PGSC0003DMG40003<br>9340 | PGSC0003DMT4000<br>89769 |       |     |     |                                                                                                                                                               |
| 521 | Heterozygous<br>PS in RH,<br>shared by DM | PGSC0003DMG40003<br>9347 | PGSC0003DMT4000<br>89776 | chr06 | yes | yes | GO:0008270; zinc ion binding; Molecular<br>Function                                                                                                           |
| 522 | Heterozygous<br>PS in RH,<br>shared by DM | PGSC0003DMG40003<br>9355 | PGSC0003DMT4000<br>89784 | chr01 | yes | NO  |                                                                                                                                                               |
| 523 | Heterozygous<br>PS in RH,<br>shared by DM | PGSC0003DMG40003<br>9361 | PGSC0003DMT4000<br>89790 | chr05 | NO  | NO  |                                                                                                                                                               |
| 524 | Heterozygous<br>PS in RH,<br>shared by DM | PGSC0003DMG40003<br>9446 | PGSC0003DMT4000<br>89875 | chr10 | yes | yes |                                                                                                                                                               |

|     |                                           |                          |                          |       |     |     |                                                                                                                                                                                                                                       |
|-----|-------------------------------------------|--------------------------|--------------------------|-------|-----|-----|---------------------------------------------------------------------------------------------------------------------------------------------------------------------------------------------------------------------------------------|
| 525 | Heterozygous<br>PS in RH,<br>shared by DM | PGSC0003DMG40003<br>9474 | PGSC0003DMT4000<br>89903 | chr04 | NO  | NO  |                                                                                                                                                                                                                                       |
| 526 | Heterozygous<br>PS in RH,<br>shared by DM | PGSC0003DMG40003<br>9525 | PGSC0003DMT4000<br>89954 | chr06 | yes | yes |                                                                                                                                                                                                                                       |
| 527 | Heterozygous<br>PS in RH,<br>shared by DM | PGSC0003DMG40003<br>9542 | PGSC0003DMT4000<br>89971 | -     | yes | NO  | GO:0004672; protein kinase activity;<br>Molecular Function GO:0005515; protein<br>binding; Molecular Function<br>GO:0005524; ATP binding; Molecular<br>Function GO:0006468; protein amino acid<br>phosphorylation; Biological Process |
| 528 | Heterozygous<br>PS in RH,<br>shared by DM | PGSC0003DMG40003<br>9590 | PGSC0003DMT4000<br>90019 | chr05 | NO  | NO  |                                                                                                                                                                                                                                       |
| 529 | Heterozygous<br>PS in RH,<br>shared by DM | PGSC0003DMG40004<br>0029 | PGSC0003DMT4000<br>90458 | chr02 | yes | NO  | GO:0003677; DNA binding; Molecular<br>Function GO:0005634; nucleus; Cellular<br>Component                                                                                                                                             |
| 530 | Heterozygous<br>PS in RH,<br>shared by DM | PGSC0003DMG40004<br>0069 | PGSC0003DMT4000<br>90498 | chr09 | NO  | NO  |                                                                                                                                                                                                                                       |
| 531 | Heterozygous<br>PS in RH,<br>shared by DM | PGSC0003DMG40004<br>0071 | PGSC0003DMT4000<br>90500 | chr08 | NO  | NO  | GO:0004190; aspartic-type endopeptidase<br>activity; Molecular Function<br>GO:0006508; proteolysis; Biological<br>Process                                                                                                             |
| 532 | Heterozygous<br>PS in RH,<br>shared by DM | PGSC0003DMG40004<br>0207 | PGSC0003DMT4000<br>90636 | chr11 | NO  | NO  |                                                                                                                                                                                                                                       |
| 533 | Heterozygous<br>PS in RH,<br>shared by DM | PGSC0003DMG40004<br>0234 | PGSC0003DMT4000<br>90663 | -     | NO  | NO  |                                                                                                                                                                                                                                       |
| 534 | Heterozygous<br>PS in RH,<br>shared by DM | PGSC0003DMG40004<br>0271 | PGSC0003DMT4000<br>90700 | chr06 | yes | yes |                                                                                                                                                                                                                                       |
| 535 | Heterozygous<br>PS in RH,<br>shared by DM | PGSC0003DMG40004<br>0327 | PGSC0003DMT4000<br>90756 | chr11 | NO  | NO  |                                                                                                                                                                                                                                       |

|     |                                           |                          |                          |       |     |     |                                                                                                                                                                                                                                                               |
|-----|-------------------------------------------|--------------------------|--------------------------|-------|-----|-----|---------------------------------------------------------------------------------------------------------------------------------------------------------------------------------------------------------------------------------------------------------------|
| 536 | Heterozygous<br>PS in RH,<br>shared by DM | PGSC0003DMG40004<br>0427 | PGSC0003DMT4000<br>90856 | chr10 | NO  | NO  | GO:0003824; catalytic activity; Molecular<br>Function GO:0004356; glutamate-<br>ammonia ligase activity; Molecular<br>Function GO:0006807; nitrogen<br>compound metabolic process; Biological<br>Process GO:0008152; metabolic process;<br>Biological Process |
| 537 | Heterozygous<br>PS in RH,<br>shared by DM | PGSC0003DMG40004<br>0439 | PGSC0003DMT4000<br>90868 | -     | yes | NO  |                                                                                                                                                                                                                                                               |
| 538 | Heterozygous<br>PS in RH,<br>shared by DM | PGSC0003DMG40004<br>0510 | PGSC0003DMT4000<br>90939 | chr01 | yes | yes | GO:0003677; DNA binding; Molecular<br>Function GO:0005524; ATP binding;<br>Molecular Function GO:0006260; DNA<br>replication; Biological Process<br>GO:0005622; intracellular; Cellular<br>Component GO:0007165; signal<br>transduction; Biological Process   |
| 539 | Heterozygous<br>PS in RH,<br>shared by DM | PGSC0003DMG40004<br>0593 | PGSC0003DMT4000<br>91022 | chr06 | NO  | NO  |                                                                                                                                                                                                                                                               |
| 540 | Heterozygous<br>PS in RH,<br>shared by DM | PGSC0003DMG40004<br>0614 | PGSC0003DMT4000<br>91043 | chr06 | yes | NO  |                                                                                                                                                                                                                                                               |
| 541 | Heterozygous<br>PS in RH,<br>shared by DM | PGSC0003DMG40004<br>0684 | PGSC0003DMT4000<br>91113 | chr01 | yes | NO  |                                                                                                                                                                                                                                                               |
| 542 | Heterozygous<br>PS in RH,<br>shared by DM | PGSC0003DMG40004<br>0707 | PGSC0003DMT4000<br>91136 | chr12 | yes | NO  | GO:0005515; protein binding; Molecular<br>Function                                                                                                                                                                                                            |
| 543 | Heterozygous<br>PS in RH,<br>shared by DM | PGSC0003DMG40004<br>0891 | PGSC0003DMT4000<br>91320 | chr12 | NO  | NO  |                                                                                                                                                                                                                                                               |
| 544 | Heterozygous<br>PS in RH,<br>shared by DM | PGSC0003DMG40004<br>0977 | PGSC0003DMT4000<br>91406 |       |     |     |                                                                                                                                                                                                                                                               |
| 545 | Heterozygous<br>PS in RH,<br>shared by DM | PGSC0003DMG40004<br>1099 | PGSC0003DMT4000<br>91528 | -     | yes | NO  |                                                                                                                                                                                                                                                               |
| 546 | Heterozygous<br>PS in RH,<br>shared by DM | PGSC0003DMG40004<br>1123 | PGSC0003DMT4000<br>91552 | chr11 | yes | NO  |                                                                                                                                                                                                                                                               |

|     |                                           |                          |                          |       |     |    |                                                                                                                                                                                    |
|-----|-------------------------------------------|--------------------------|--------------------------|-------|-----|----|------------------------------------------------------------------------------------------------------------------------------------------------------------------------------------|
| 547 | Heterozygous<br>PS in RH,<br>shared by DM | PGSC0003DMG40004<br>1312 | PGSC0003DMT4000<br>91741 | chr03 | NO  | NO | GO:0006508; proteolysis; Biological<br>Process GO:0008234; cysteine-type<br>peptidase activity; Molecular Function                                                                 |
| 548 | Heterozygous<br>PS in RH,<br>shared by DM | PGSC0003DMG40004<br>1319 | PGSC0003DMT4000<br>91748 | chr06 | NO  | NO |                                                                                                                                                                                    |
| 549 | Heterozygous<br>PS in RH,<br>shared by DM | PGSC0003DMG40004<br>1327 | PGSC0003DMT4000<br>91756 | chr04 | NO  | NO |                                                                                                                                                                                    |
| 550 | Heterozygous<br>PS in RH,<br>shared by DM | PGSC0003DMG40004<br>1334 | PGSC0003DMT4000<br>91763 | chr09 | NO  | NO |                                                                                                                                                                                    |
| 551 | Heterozygous<br>PS in RH,<br>shared by DM | PGSC0003DMG40004<br>1484 | PGSC0003DMT4000<br>91913 | chr06 | yes | NO | GO:0003743; translation initiation factor<br>activity; Molecular Function<br>GO:0006413; translational initiation;<br>Biological Process                                           |
| 552 | Heterozygous<br>PS in RH,<br>shared by DM | PGSC0003DMG40004<br>1510 | PGSC0003DMT4000<br>91939 | chr07 | NO  | NO |                                                                                                                                                                                    |
| 553 | Heterozygous<br>PS in RH,<br>shared by DM | PGSC0003DMG40004<br>1521 | PGSC0003DMT4000<br>91950 | -     | NO  | NO |                                                                                                                                                                                    |
| 554 | Heterozygous<br>PS in RH,<br>shared by DM | PGSC0003DMG40004<br>1620 | PGSC0003DMT4000<br>92049 | chr01 | yes | NO | GO:0004672; protein kinase activity;<br>Molecular Function GO:0005524; ATP<br>binding; Molecular Function<br>GO:0006468; protein amino acid<br>phosphorylation; Biological Process |
| 555 | Heterozygous<br>PS in RH,<br>shared by DM | PGSC0003DMG40004<br>1685 | PGSC0003DMT4000<br>92114 | chr04 | NO  | NO |                                                                                                                                                                                    |
| 556 | Heterozygous<br>PS in RH,<br>shared by DM | PGSC0003DMG40004<br>1690 | PGSC0003DMT4000<br>92119 | chr05 | yes | NO |                                                                                                                                                                                    |
| 557 | Heterozygous<br>PS in RH,<br>shared by DM | PGSC0003DMG40004<br>1698 | PGSC0003DMT4000<br>92127 | chr04 | yes | NO | GO:0043234; protein complex; Cellular<br>Component GO:0051258; protein<br>polymerization; Biological Process                                                                       |

|     |                                           |                          |                          |       |     |     |                                                                                                                                                                                                                               |
|-----|-------------------------------------------|--------------------------|--------------------------|-------|-----|-----|-------------------------------------------------------------------------------------------------------------------------------------------------------------------------------------------------------------------------------|
| 558 | Heterozygous<br>PS in RH,<br>shared by DM | PGSC0003DMG40004<br>1790 | PGSC0003DMT4000<br>92219 | chr01 | yes | NO  | GO:0005215; transporter activity;<br>Molecular Function GO:0006810;<br>transport; Biological Process<br>GO:0016021; integral to membrane;<br>Cellular Component GO:0055085;<br>transmembrane transport; Biological<br>Process |
| 559 | Heterozygous<br>PS in RH,<br>shared by DM | PGSC0003DMG40004<br>1868 | PGSC0003DMT4000<br>92297 | chr03 | NO  | NO  | GO:0000287; magnesium ion binding;<br>Molecular Function GO:0008152;<br>metabolic process; Biological Process<br>GO:0016829; lyase activity; Molecular<br>Function                                                            |
| 560 | Heterozygous<br>PS in RH,<br>shared by DM | PGSC0003DMG40004<br>1913 | PGSC0003DMT4000<br>92342 | chr09 | NO  | NO  |                                                                                                                                                                                                                               |
| 561 | Heterozygous<br>PS in RH,<br>shared by DM | PGSC0003DMG40004<br>2114 | PGSC0003DMT4000<br>92543 | chr01 | yes | yes | GO:0016491; oxidoreductase activity;<br>Molecular Function                                                                                                                                                                    |
| 562 | Heterozygous<br>PS in RH,<br>shared by DM | PGSC0003DMG40004<br>2168 | PGSC0003DMT4000<br>92597 | chr10 | NO  | NO  |                                                                                                                                                                                                                               |
| 563 | Heterozygous<br>PS in RH,<br>shared by DM | PGSC0003DMG40004<br>2224 | PGSC0003DMT4000<br>92653 | chr06 | yes | NO  |                                                                                                                                                                                                                               |
| 564 | Heterozygous<br>PS in RH,<br>shared by DM | PGSC0003DMG40004<br>2228 | PGSC0003DMT4000<br>92657 | chr03 | yes | yes | GO:0004143; diacylglycerol kinase<br>activity; Molecular Function<br>GO:0007205; activation of protein kinase<br>C activity by G-protein coupled receptor<br>protein signaling pathway; Biological<br>Process                 |
| 565 | Heterozygous<br>PS in RH,<br>shared by DM | PGSC0003DMG40004<br>2232 | PGSC0003DMT4000<br>92661 | chr07 | NO  | NO  |                                                                                                                                                                                                                               |
| 566 | Heterozygous<br>PS in RH,<br>shared by DM | PGSC0003DMG40004<br>2286 | PGSC0003DMT4000<br>92715 | chr03 | yes | yes |                                                                                                                                                                                                                               |

|     |                                           |                          |                          |       |     |     |                                                                                                                                                                                                                                                             |
|-----|-------------------------------------------|--------------------------|--------------------------|-------|-----|-----|-------------------------------------------------------------------------------------------------------------------------------------------------------------------------------------------------------------------------------------------------------------|
| 567 | Heterozygous<br>PS in RH,<br>shared by DM | PGSC0003DMG40004<br>2351 | PGSC0003DMT4000<br>92780 | chr09 | NO  | NO  |                                                                                                                                                                                                                                                             |
| 568 | Heterozygous<br>PS in RH,<br>shared by DM | PGSC0003DMG40004<br>2402 | PGSC0003DMT4000<br>92831 | chr10 | NO  | NO  |                                                                                                                                                                                                                                                             |
| 569 | Heterozygous<br>PS in RH,<br>shared by DM | PGSC0003DMG40004<br>2441 | PGSC0003DMT4000<br>92870 | chr03 | yes | yes | GO:0004252; serine-type endopeptidase activity; Molecular Function<br>GO:0006508; proteolysis; Biological Process<br>GO:0042802; identical protein binding; Molecular Function<br>GO:0043086; negative regulation of catalytic activity; Biological Process |
| 570 | Heterozygous<br>PS in RH,<br>shared by DM | PGSC0003DMG40004<br>2468 | PGSC0003DMT4000<br>92897 | chr09 | yes | NO  | GO:0003824; catalytic activity; Molecular Function<br>GO:0006631; fatty acid metabolic process; Biological Process<br>GO:0008152; metabolic process; Biological Process<br>GO:0016491; oxidoreductase activity; Molecular Function                          |
| 571 | Heterozygous<br>PS in RH,<br>shared by DM | PGSC0003DMG40004<br>2476 | PGSC0003DMT4000<br>92905 | chr07 | NO  | NO  | GO:0005515; protein binding; Molecular Function                                                                                                                                                                                                             |
| 572 | Heterozygous<br>PS in RH,<br>shared by DM | PGSC0003DMG40004<br>2480 | PGSC0003DMT4000<br>92909 | chr02 | NO  | NO  |                                                                                                                                                                                                                                                             |
| 573 | Heterozygous<br>PS in RH,<br>shared by DM | PGSC0003DMG40004<br>2484 | PGSC0003DMT4000<br>92913 | chr06 | yes | yes |                                                                                                                                                                                                                                                             |
| 574 | Heterozygous<br>PS in RH,<br>shared by DM | PGSC0003DMG40004<br>2520 | PGSC0003DMT4000<br>92949 | chr05 | NO  | NO  |                                                                                                                                                                                                                                                             |
| 575 | Heterozygous<br>PS in RH,<br>shared by DM | PGSC0003DMG40004<br>2536 | PGSC0003DMT4000<br>92965 | -     | yes | NO  | GO:0003723; RNA binding; Molecular Function<br>GO:0003964; RNA-directed DNA polymerase activity; Molecular Function<br>GO:0006278; RNA-dependent DNA replication; Biological Process                                                                        |

|     |                                           |                          |                          |       |     |     |                                                                                                                                                                                    |
|-----|-------------------------------------------|--------------------------|--------------------------|-------|-----|-----|------------------------------------------------------------------------------------------------------------------------------------------------------------------------------------|
| 576 | Heterozygous<br>PS in RH,<br>shared by DM | PGSC0003DMG40004<br>2633 | PGSC0003DMT4000<br>93062 | chr04 | yes | NO  | GO:0005515; protein binding; Molecular<br>Function GO:0005524; ATP binding;<br>Molecular Function GO:0044267; cellular<br>protein metabolic process; Biological<br>Process         |
| 577 | Heterozygous<br>PS in RH,<br>shared by DM | PGSC0003DMG40004<br>2661 | PGSC0003DMT4000<br>93090 | chr01 | yes | NO  |                                                                                                                                                                                    |
| 578 | Heterozygous<br>PS in RH,<br>shared by DM | PGSC0003DMG40004<br>2762 | PGSC0003DMT4000<br>93191 | -     | yes | yes | GO:0016747; transferase activity,<br>transferring acyl groups other than amino-<br>acyl groups; Molecular Function<br>GO:0008146; sulfotransferase activity;<br>Molecular Function |
| 579 | Heterozygous<br>PS in RH,<br>shared by DM | PGSC0003DMG40004<br>2819 | PGSC0003DMT4000<br>93248 | chr05 | yes | NO  |                                                                                                                                                                                    |
| 580 | Heterozygous<br>PS in RH,<br>shared by DM | PGSC0003DMG40004<br>2877 | PGSC0003DMT4000<br>93306 | chr03 | NO  | NO  |                                                                                                                                                                                    |
| 581 | Heterozygous<br>PS in RH,<br>shared by DM | PGSC0003DMG40004<br>2892 | PGSC0003DMT4000<br>93321 | chr05 | yes | NO  |                                                                                                                                                                                    |
| 582 | Heterozygous<br>PS in RH,<br>shared by DM | PGSC0003DMG40004<br>2894 | PGSC0003DMT4000<br>93323 | chr10 | NO  | NO  |                                                                                                                                                                                    |
| 583 | Heterozygous<br>PS in RH,<br>shared by DM | PGSC0003DMG40004<br>2975 | PGSC0003DMT4000<br>93404 | chr11 | NO  | NO  |                                                                                                                                                                                    |
| 584 | Heterozygous<br>PS in RH,<br>shared by DM | PGSC0003DMG40004<br>2981 | PGSC0003DMT4000<br>93410 | chr09 | NO  | NO  |                                                                                                                                                                                    |
| 585 | Heterozygous<br>PS in RH,<br>shared by DM | PGSC0003DMG40004<br>3090 | PGSC0003DMT4000<br>93519 | chr06 | yes | yes | GO:0008270; zinc ion binding; Molecular<br>Function GO:0016491; oxidoreductase<br>activity; Molecular Function GO:0055114;<br>oxidation reduction; Biological Process              |
| 586 | Heterozygous<br>PS in RH,<br>shared by DM | PGSC0003DMG40004<br>3110 | PGSC0003DMT4000<br>93539 | chr01 | yes | NO  |                                                                                                                                                                                    |



|     |                                           |                          |                          |       |     |     |                                                                                                                                                                                                                                              |
|-----|-------------------------------------------|--------------------------|--------------------------|-------|-----|-----|----------------------------------------------------------------------------------------------------------------------------------------------------------------------------------------------------------------------------------------------|
| 587 | Heterozygous<br>PS in RH,<br>shared by DM | PGSC0003DMG40004<br>3294 | PGSC0003DMT4000<br>93723 | chr12 | NO  | NO  | GO:0004672; protein kinase activity;<br>Molecular Function GO:0005524; ATP<br>binding; Molecular Function<br>GO:0006468; protein amino acid<br>phosphorylation; Biological Process                                                           |
| 588 | Heterozygous<br>PS in RH,<br>shared by DM | PGSC0003DMG40004<br>3378 | PGSC0003DMT4000<br>93807 | chr03 | yes | yes |                                                                                                                                                                                                                                              |
| 589 | Heterozygous<br>PS in RH,<br>shared by DM | PGSC0003DMG40004<br>3408 | PGSC0003DMT4000<br>93837 | chr04 | yes | NO  | GO:0004672; protein kinase activity;<br>Molecular Function GO:0005524; ATP<br>binding; Molecular Function<br>GO:0006468; protein amino acid<br>phosphorylation; Biological Process<br>GO:0007165; signal transduction;<br>Biological Process |
| 590 | Heterozygous<br>PS in RH,<br>shared by DM | PGSC0003DMG40004<br>3481 | PGSC0003DMT4000<br>93910 | chr08 | yes | yes |                                                                                                                                                                                                                                              |
| 591 | Heterozygous<br>PS in RH,<br>shared by DM | PGSC0003DMG40004<br>3606 | PGSC0003DMT4000<br>94035 | chr11 | NO  | NO  |                                                                                                                                                                                                                                              |
| 592 | Heterozygous<br>PS in RH,<br>shared by DM | PGSC0003DMG40004<br>3689 | PGSC0003DMT4000<br>94118 | chr11 | yes | NO  |                                                                                                                                                                                                                                              |
| 593 | Heterozygous<br>PS in RH,<br>shared by DM | PGSC0003DMG40004<br>3749 | PGSC0003DMT4000<br>94178 | -     | NO  | NO  |                                                                                                                                                                                                                                              |
| 594 | Heterozygous<br>PS in RH,<br>shared by DM | PGSC0003DMG40004<br>3752 | PGSC0003DMT4000<br>94181 | chr09 | yes | yes | GO:0004672; protein kinase activity;<br>Molecular Function GO:0005524; ATP<br>binding; Molecular Function<br>GO:0006468; protein amino acid<br>phosphorylation; Biological Process                                                           |
| 595 | Heterozygous<br>PS in RH,<br>shared by DM | PGSC0003DMG40004<br>3868 | PGSC0003DMT4000<br>94297 | chr04 | yes | yes |                                                                                                                                                                                                                                              |
| 596 | Heterozygous<br>PS in RH,<br>shared by DM | PGSC0003DMG40004<br>3890 | PGSC0003DMT4000<br>94319 | chr01 | yes | NO  |                                                                                                                                                                                                                                              |

|     |                                           |                          |                          |       |     |     |                                                                                                                                                                                                                                                                                     |
|-----|-------------------------------------------|--------------------------|--------------------------|-------|-----|-----|-------------------------------------------------------------------------------------------------------------------------------------------------------------------------------------------------------------------------------------------------------------------------------------|
| 597 | Heterozygous<br>PS in RH,<br>shared by DM | PGSC0003DMG40004<br>3955 | PGSC0003DMT4000<br>94384 | chr04 | yes | NO  | GO:0004497; monooxygenase activity;<br>Molecular Function GO:0005506; iron ion<br>binding; Molecular Function<br>GO:0009055; electron carrier activity;<br>Molecular Function GO:0020037; heme<br>binding; Molecular Function<br>GO:0005515; protein binding; Molecular<br>Function |
| 598 | Heterozygous<br>PS in RH,<br>shared by DM | PGSC0003DMG40004<br>4045 | PGSC0003DMT4000<br>94474 | -     | yes | NO  |                                                                                                                                                                                                                                                                                     |
| 599 | Heterozygous<br>PS in RH,<br>shared by DM | PGSC0003DMG40004<br>4048 | PGSC0003DMT4000<br>94477 | chr02 | NO  | NO  |                                                                                                                                                                                                                                                                                     |
| 600 | Heterozygous<br>PS in RH,<br>shared by DM | PGSC0003DMG40004<br>4137 | PGSC0003DMT4000<br>94566 | chr12 | NO  | NO  |                                                                                                                                                                                                                                                                                     |
| 601 | Heterozygous<br>PS in RH,<br>shared by DM | PGSC0003DMG40004<br>4146 | PGSC0003DMT4000<br>94575 | chr02 | yes | NO  |                                                                                                                                                                                                                                                                                     |
| 602 | Heterozygous<br>PS in RH,<br>shared by DM | PGSC0003DMG40004<br>4187 | PGSC0003DMT4000<br>94616 | chr06 | yes | yes |                                                                                                                                                                                                                                                                                     |
| 603 | Heterozygous<br>PS in RH,<br>shared by DM | PGSC0003DMG40004<br>4188 | PGSC0003DMT4000<br>94617 | -     | NO  | NO  |                                                                                                                                                                                                                                                                                     |
| 604 | Heterozygous<br>PS in RH,<br>shared by DM | PGSC0003DMG40004<br>4203 | PGSC0003DMT4000<br>94632 | chr01 | NO  | NO  |                                                                                                                                                                                                                                                                                     |
| 605 | Heterozygous<br>PS in RH,<br>shared by DM | PGSC0003DMG40004<br>4323 | PGSC0003DMT4000<br>94752 | chr02 | yes | yes | GO:0004672; protein kinase activity;<br>Molecular Function GO:0005524; ATP<br>binding; Molecular Function<br>GO:0006468; protein amino acid<br>phosphorylation; Biological Process                                                                                                  |
| 606 | Heterozygous<br>PS in RH,<br>shared by DM | PGSC0003DMG40004<br>4412 | PGSC0003DMT4000<br>94841 | chr04 | yes | NO  | GO:0004672; protein kinase activity;<br>Molecular Function GO:0005515; protein<br>binding; Molecular Function<br>GO:0005524; ATP binding; Molecular<br>Function GO:0006468; protein amino acid<br>phosphorylation; Biological Process                                               |

|     |                                           |                          |                          |       |     |     |                                                                                                                                                                                                                                       |
|-----|-------------------------------------------|--------------------------|--------------------------|-------|-----|-----|---------------------------------------------------------------------------------------------------------------------------------------------------------------------------------------------------------------------------------------|
| 607 | Heterozygous<br>PS in RH,<br>shared by DM | PGSC0003DMG40004<br>4438 | PGSC0003DMT4000<br>94867 | chr07 | NO  | NO  |                                                                                                                                                                                                                                       |
| 608 | Heterozygous<br>PS in RH,<br>shared by DM | PGSC0003DMG40004<br>4481 | PGSC0003DMT4000<br>94910 | -     | NO  | NO  |                                                                                                                                                                                                                                       |
| 609 | Heterozygous<br>PS in RH,<br>shared by DM | PGSC0003DMG40004<br>4484 | PGSC0003DMT4000<br>94913 | chr09 | yes | NO  |                                                                                                                                                                                                                                       |
| 610 | Heterozygous<br>PS in RH,<br>shared by DM | PGSC0003DMG40004<br>4747 | PGSC0003DMT4000<br>95176 | chr04 | yes | yes |                                                                                                                                                                                                                                       |
| 611 | Heterozygous<br>PS in RH,<br>shared by DM | PGSC0003DMG40004<br>4843 | PGSC0003DMT4000<br>95272 | chr01 | yes | yes |                                                                                                                                                                                                                                       |
| 612 | Heterozygous<br>PS in RH,<br>shared by DM | PGSC0003DMG40004<br>4863 | PGSC0003DMT4000<br>95292 | chr04 | yes | NO  | GO:0005215; transporter activity;<br>Molecular Function GO:0006857;<br>oligopeptide transport; Biological Process<br>GO:0016020; membrane; Cellular<br>Component                                                                      |
| 613 | Heterozygous<br>PS in RH,<br>shared by DM | PGSC0003DMG40004<br>4871 | PGSC0003DMT4000<br>95300 | -     | NO  | NO  |                                                                                                                                                                                                                                       |
| 614 | Heterozygous<br>PS in RH,<br>shared by DM | PGSC0003DMG40004<br>4939 | PGSC0003DMT4000<br>95368 | chr01 | yes | NO  |                                                                                                                                                                                                                                       |
| 615 | Heterozygous<br>PS in RH,<br>shared by DM | PGSC0003DMG40004<br>5119 | PGSC0003DMT4000<br>95548 | chr09 | NO  | NO  |                                                                                                                                                                                                                                       |
| 616 | Heterozygous<br>PS in RH,<br>shared by DM | PGSC0003DMG40004<br>5166 | PGSC0003DMT4000<br>95595 | chr02 | yes | NO  | GO:0004672; protein kinase activity;<br>Molecular Function GO:0005515; protein<br>binding; Molecular Function<br>GO:0005524; ATP binding; Molecular<br>Function GO:0006468; protein amino acid<br>phosphorylation; Biological Process |
| 617 | Heterozygous<br>PS in RH,<br>shared by DM | PGSC0003DMG40004<br>5185 | PGSC0003DMT4000<br>95614 | -     | yes | yes |                                                                                                                                                                                                                                       |

|     |                                           |                          |                          |       |     |     |                                                                                                                                                                                                                                     |
|-----|-------------------------------------------|--------------------------|--------------------------|-------|-----|-----|-------------------------------------------------------------------------------------------------------------------------------------------------------------------------------------------------------------------------------------|
| 618 | Heterozygous<br>PS in RH,<br>shared by DM | PGSC0003DMG40004<br>5186 | PGSC0003DMT4000<br>95615 | chr01 | yes | NO  |                                                                                                                                                                                                                                     |
| 619 | Heterozygous<br>PS in RH,<br>shared by DM | PGSC0003DMG40004<br>5217 | PGSC0003DMT4000<br>95646 | chr01 | NO  | NO  |                                                                                                                                                                                                                                     |
| 620 | Heterozygous<br>PS in RH,<br>shared by DM | PGSC0003DMG40004<br>5226 | PGSC0003DMT4000<br>95655 | chr05 | yes | yes |                                                                                                                                                                                                                                     |
| 621 | Heterozygous<br>PS in RH,<br>shared by DM | PGSC0003DMG40004<br>5246 | PGSC0003DMT4000<br>95675 | -     | NO  | NO  |                                                                                                                                                                                                                                     |
| 622 | Heterozygous<br>PS in RH,<br>shared by DM | PGSC0003DMG40004<br>5267 | PGSC0003DMT4000<br>95696 | chr12 | yes | NO  |                                                                                                                                                                                                                                     |
| 623 | Heterozygous<br>PS in RH,<br>shared by DM | PGSC0003DMG40004<br>5394 | PGSC0003DMT4000<br>95823 | chr07 | yes | NO  | GO:0004672; protein kinase activity;<br>Molecular Function GO:0005524; ATP<br>binding; Molecular Function<br>GO:0005529; sugar binding; Molecular<br>Function GO:0006468; protein amino acid<br>phosphorylation; Biological Process |
| 624 | Heterozygous<br>PS in RH,<br>shared by DM | PGSC0003DMG40004<br>5804 | PGSC0003DMT4000<br>96233 | chr06 | yes | yes |                                                                                                                                                                                                                                     |
| 625 | Heterozygous<br>PS in RH,<br>shared by DM | PGSC0003DMG40004<br>5810 | PGSC0003DMT4000<br>96239 | chr02 | yes | NO  | GO:0005515; protein binding; Molecular<br>Function                                                                                                                                                                                  |
| 626 | Heterozygous<br>PS in RH,<br>shared by DM | PGSC0003DMG40004<br>5968 | PGSC0003DMT4000<br>96397 | chr02 | yes | NO  |                                                                                                                                                                                                                                     |
| 627 | Heterozygous<br>PS in RH,<br>shared by DM | PGSC0003DMG40004<br>6018 | PGSC0003DMT4000<br>96447 |       |     |     |                                                                                                                                                                                                                                     |
| 628 | Heterozygous<br>PS in RH,<br>shared by DM | PGSC0003DMG40004<br>6080 | PGSC0003DMT4000<br>96509 | chr02 | yes | yes |                                                                                                                                                                                                                                     |

|     |                                           |                          |                          |       |     |    |                                                                                                                                                                                                                                          |
|-----|-------------------------------------------|--------------------------|--------------------------|-------|-----|----|------------------------------------------------------------------------------------------------------------------------------------------------------------------------------------------------------------------------------------------|
| 629 | Heterozygous<br>PS in RH,<br>shared by DM | PGSC0003DMG40004<br>6151 | PGSC0003DMT4000<br>96580 | chr04 | yes | NO |                                                                                                                                                                                                                                          |
| 630 | Heterozygous<br>PS in RH,<br>shared by DM | PGSC0003DMG40004<br>6172 | PGSC0003DMT4000<br>96601 | chr11 | NO  | NO |                                                                                                                                                                                                                                          |
| 631 | Heterozygous<br>PS in RH,<br>shared by DM | PGSC0003DMG40004<br>6297 | PGSC0003DMT4000<br>96726 | chr03 | NO  | NO |                                                                                                                                                                                                                                          |
| 632 | Heterozygous<br>PS in RH,<br>shared by DM | PGSC0003DMG40004<br>6427 | PGSC0003DMT4000<br>96856 | chr03 | yes | NO |                                                                                                                                                                                                                                          |
| 633 | Heterozygous<br>PS in RH,<br>shared by DM | PGSC0003DMG40004<br>6437 | PGSC0003DMT4000<br>96866 | -     | NO  | NO |                                                                                                                                                                                                                                          |
| 634 | Heterozygous<br>PS in RH,<br>shared by DM | PGSC0003DMG40004<br>6464 | PGSC0003DMT4000<br>96893 | chr12 | NO  | NO |                                                                                                                                                                                                                                          |
| 635 | Heterozygous<br>PS in RH,<br>shared by DM | PGSC0003DMG40004<br>6470 | PGSC0003DMT4000<br>96899 |       |     |    |                                                                                                                                                                                                                                          |
| 636 | Heterozygous<br>PS in RH,<br>shared by DM | PGSC0003DMG40004<br>6512 | PGSC0003DMT4000<br>96941 | chr05 | yes | NO | GO:0004713; protein tyrosine kinase activity; Molecular Function<br>GO:0005515; protein binding; Molecular Function<br>GO:0005524; ATP binding; Molecular Function<br>GO:0006468; protein amino acid phosphorylation; Biological Process |
| 637 | Heterozygous<br>PS in RH,<br>shared by DM | PGSC0003DMG40004<br>6549 | PGSC0003DMT4000<br>96978 | chr10 | yes | NO |                                                                                                                                                                                                                                          |
| 638 | Heterozygous<br>PS in RH,<br>shared by DM | PGSC0003DMG40004<br>6621 | PGSC0003DMT4000<br>97050 | chr08 | NO  | NO | GO:0004497; monooxygenase activity; Molecular Function<br>GO:0005506; iron ion binding; Molecular Function<br>GO:0009055; electron carrier activity; Molecular Function<br>GO:0020037; heme binding; Molecular Function                  |

|     |                                           |                          |                          |       |     |     |                                                                                                                                                                                                                                        |
|-----|-------------------------------------------|--------------------------|--------------------------|-------|-----|-----|----------------------------------------------------------------------------------------------------------------------------------------------------------------------------------------------------------------------------------------|
| 639 | Heterozygous<br>PS in RH,<br>shared by DM | PGSC0003DMG40004<br>6625 | PGSC0003DMT4000<br>97054 | chr07 | yes | NO  |                                                                                                                                                                                                                                        |
| 640 | Heterozygous<br>PS in RH,<br>shared by DM | PGSC0003DMG40004<br>6780 | PGSC0003DMT4000<br>97209 | chr12 | NO  | NO  |                                                                                                                                                                                                                                        |
| 641 | Heterozygous<br>PS in RH,<br>shared by DM | PGSC0003DMG40004<br>6791 | PGSC0003DMT4000<br>97220 | chr04 | NO  | NO  |                                                                                                                                                                                                                                        |
| 642 | Heterozygous<br>PS in RH,<br>shared by DM | PGSC0003DMG40004<br>6847 | PGSC0003DMT4000<br>97276 | chr11 | NO  | NO  |                                                                                                                                                                                                                                        |
| 643 | Heterozygous<br>PS in RH,<br>shared by DM | PGSC0003DMG40004<br>6877 | PGSC0003DMT4000<br>97306 | chr04 | NO  | NO  | GO:0003723; RNA binding; Molecular Function GO:0003964; RNA-directed DNA polymerase activity; Molecular Function GO:0006278; RNA-dependent DNA replication; Biological Process GO:0005515; protein binding; Molecular Function         |
| 644 | Heterozygous<br>PS in RH,<br>shared by DM | PGSC0003DMG40004<br>6907 | PGSC0003DMT4000<br>97336 | -     | yes | NO  | GO:0005515; protein binding; Molecular Function                                                                                                                                                                                        |
| 645 | Heterozygous<br>PS in RH,<br>shared by DM | PGSC0003DMG40004<br>7005 | PGSC0003DMT4000<br>97434 | chr03 | yes | NO  | GO:0016491; oxidoreductase activity; Molecular Function                                                                                                                                                                                |
| 646 | Heterozygous<br>PS in RH,<br>shared by DM | PGSC0003DMG40004<br>7036 | PGSC0003DMT4000<br>97465 | chr09 | yes | yes | GO:0016884; carbon-nitrogen ligase activity, with glutamine as amido-N-donor; Molecular Function                                                                                                                                       |
| 647 | Heterozygous<br>PS in RH,<br>shared by DM | PGSC0003DMG40004<br>7079 | PGSC0003DMT4000<br>97508 | chr08 | yes | NO  |                                                                                                                                                                                                                                        |
| 648 | Heterozygous<br>PS in RH,<br>shared by DM | PGSC0003DMG40004<br>7103 | PGSC0003DMT4000<br>97532 | -     | yes | NO  | GO:0003677; DNA binding; Molecular Function GO:0005634; nucleus; Cellular Component GO:0006511; ubiquitin-dependent protein catabolic process; Biological Process GO:0007275; multicellular organismal development; Biological Process |

|     |                                           |                          |                          |       |     |     |                                                                                                                                                                                                                      |
|-----|-------------------------------------------|--------------------------|--------------------------|-------|-----|-----|----------------------------------------------------------------------------------------------------------------------------------------------------------------------------------------------------------------------|
| 649 | Heterozygous<br>PS in RH,<br>shared by DM | PGSC0003DMG40004<br>7112 | PGSC0003DMT4000<br>97541 | chr09 | NO  | NO  | GO:0003700; transcription factor activity;<br>Molecular Function GO:0005667;<br>transcription factor complex; Cellular<br>Component GO:0006355; regulation of<br>transcription, DNA-dependent; Biological<br>Process |
| 650 | Heterozygous<br>PS in RH,<br>shared by DM | PGSC0003DMG40004<br>7184 | PGSC0003DMT4000<br>97613 | chr12 | NO  | NO  |                                                                                                                                                                                                                      |
| 651 | Heterozygous<br>PS in RH,<br>shared by DM | PGSC0003DMG40004<br>7275 | PGSC0003DMT4000<br>97704 | -     | NO  | NO  |                                                                                                                                                                                                                      |
| 652 | Heterozygous<br>PS in RH,<br>shared by DM | PGSC0003DMG40004<br>7346 | PGSC0003DMT4000<br>97775 | chr01 | yes | NO  | GO:0004553; hydrolase activity,<br>hydrolyzing O-glycosyl compounds;<br>Molecular Function GO:0005975;<br>carbohydrate metabolic process;<br>Biological Process                                                      |
| 653 | PS in DM only                             | PGSC0003DMG40000<br>0214 | PGSC0003DMT4000<br>00605 | chr09 | yes | NO  |                                                                                                                                                                                                                      |
| 654 | PS in DM only                             | PGSC0003DMG40100<br>0479 | PGSC0003DMT4000<br>01251 | chr05 | NO  | NO  | GO:0008152; metabolic process;<br>Biological Process GO:0016491;<br>oxidoreductase activity; Molecular<br>Function GO:0055114; oxidation<br>reduction; Biological Process                                            |
| 655 | PS in DM only                             | PGSC0003DMG40000<br>0483 | PGSC0003DMT4000<br>01270 | chr08 | NO  | NO  |                                                                                                                                                                                                                      |
| 656 | PS in DM only                             | PGSC0003DMG40000<br>0637 | PGSC0003DMT4000<br>01705 | -     | NO  | NO  |                                                                                                                                                                                                                      |
| 657 | PS in DM only                             | PGSC0003DMG40000<br>0682 | PGSC0003DMT4000<br>01821 | chr12 | yes | NO  |                                                                                                                                                                                                                      |
| 658 | PS in DM only                             | PGSC0003DMG40000<br>0815 | PGSC0003DMT4000<br>02131 | chr03 | yes | yes |                                                                                                                                                                                                                      |
| 659 | PS in DM only                             | PGSC0003DMG40000<br>0905 | PGSC0003DMT4000<br>02367 | chr06 | yes | NO  | GO:0003735; structural constituent of<br>ribosome; Molecular Function<br>GO:0005622; intracellular; Cellular<br>Component GO:0005840; ribosome;<br>Cellular Component GO:0006412;<br>translation; Biological Process |

|     |               |                          |                          |       |     |     |                                                                                                                                                                                                                                                                                                                                                     |
|-----|---------------|--------------------------|--------------------------|-------|-----|-----|-----------------------------------------------------------------------------------------------------------------------------------------------------------------------------------------------------------------------------------------------------------------------------------------------------------------------------------------------------|
| 660 | PS in DM only | PGSC0003DMG40000<br>0971 | PGSC0003DMT4000<br>02545 | chr03 | yes | NO  | GO:0005524; ATP binding; Molecular Function GO:0006810; transport; Biological Process GO:0016021; integral to membrane; Cellular Component GO:0016887; ATPase activity; Molecular Function GO:0042626; ATPase activity, coupled to transmembrane movement of substances; Molecular Function GO:0055085; transmembrane transport; Biological Process |
| 661 | PS in DM only | PGSC0003DMG40000<br>1286 | PGSC0003DMT4000<br>03249 | chr10 | yes | NO  | GO:0004672; protein kinase activity; Molecular Function GO:0005515; protein binding; Molecular Function GO:0005524; ATP binding; Molecular Function GO:0006468; protein amino acid phosphorylation; Biological Process                                                                                                                              |
| 662 | PS in DM only | PGSC0003DMG40000<br>2019 | PGSC0003DMT4000<br>05106 | chr12 | NO  | NO  |                                                                                                                                                                                                                                                                                                                                                     |
| 663 | PS in DM only | PGSC0003DMG40000<br>2693 | PGSC0003DMT4000<br>06951 | chr01 | yes | NO  | GO:0016020; membrane; Cellular Component                                                                                                                                                                                                                                                                                                            |
| 664 | PS in DM only | PGSC0003DMG40000<br>2730 | PGSC0003DMT4000<br>07068 |       |     |     |                                                                                                                                                                                                                                                                                                                                                     |
| 665 | PS in DM only | PGSC0003DMG40000<br>2740 | PGSC0003DMT4000<br>07079 | chr07 | yes | NO  |                                                                                                                                                                                                                                                                                                                                                     |
| 666 | PS in DM only | PGSC0003DMG40000<br>3097 | PGSC0003DMT4000<br>08016 | chr12 | yes | NO  |                                                                                                                                                                                                                                                                                                                                                     |
| 667 | PS in DM only | PGSC0003DMG40000<br>3158 | PGSC0003DMT4000<br>08191 | chr07 | yes | yes |                                                                                                                                                                                                                                                                                                                                                     |
| 668 | PS in DM only | PGSC0003DMG40000<br>3198 | PGSC0003DMT4000<br>08300 | chr10 | yes | NO  | GO:0004672; protein kinase activity; Molecular Function GO:0005524; ATP binding; Molecular Function GO:0006468; protein amino acid phosphorylation; Biological Process                                                                                                                                                                              |



|     |               |                          |                          |       |     |     |                                                                                                                                                                                                                               |
|-----|---------------|--------------------------|--------------------------|-------|-----|-----|-------------------------------------------------------------------------------------------------------------------------------------------------------------------------------------------------------------------------------|
| 669 | PS in DM only | PGSC0003DMG40000<br>3332 | PGSC0003DMT4000<br>08607 | chr10 | NO  | NO  | GO:0005215; transporter activity;<br>Molecular Function GO:0006810;<br>transport; Biological Process<br>GO:0016021; integral to membrane;<br>Cellular Component GO:0055085;<br>transmembrane transport; Biological<br>Process |
| 670 | PS in DM only | PGSC0003DMG40000<br>3405 | PGSC0003DMT4000<br>08765 | chr10 | NO  | NO  |                                                                                                                                                                                                                               |
| 671 | PS in DM only | PGSC0003DMG40100<br>3479 | PGSC0003DMT4000<br>08933 | -     | NO  | NO  |                                                                                                                                                                                                                               |
| 672 | PS in DM only | PGSC0003DMG40000<br>3587 | PGSC0003DMT4000<br>09240 | -     | NO  | NO  |                                                                                                                                                                                                                               |
| 673 | PS in DM only | PGSC0003DMG40000<br>3813 | PGSC0003DMT4000<br>09745 | chr12 | yes | NO  | GO:0004553; hydrolase activity,<br>hydrolyzing O-glycosyl compounds;<br>Molecular Function GO:0005975;<br>carbohydrate metabolic process;<br>Biological Process                                                               |
| 674 | PS in DM only | PGSC0003DMG40000<br>3836 | PGSC0003DMT4000<br>09801 | chr04 | NO  | NO  |                                                                                                                                                                                                                               |
| 675 | PS in DM only | PGSC0003DMG40200<br>4079 | PGSC0003DMT4000<br>10448 | -     | NO  | NO  |                                                                                                                                                                                                                               |
| 676 | PS in DM only | PGSC0003DMG40000<br>4447 | PGSC0003DMT4000<br>11355 | chr05 | NO  | NO  |                                                                                                                                                                                                                               |
| 677 | PS in DM only | PGSC0003DMG40000<br>4669 | PGSC0003DMT4000<br>11895 | chr09 | yes | yes | GO:0003676; nucleic acid binding;<br>Molecular Function GO:0008168;<br>methyltransferase activity; Molecular<br>Function GO:0032259; methylation;<br>Biological Process                                                       |

|     |               |                          |                          |       |     |    |                                                                                                                                                                                                                                                                                                                                             |
|-----|---------------|--------------------------|--------------------------|-------|-----|----|---------------------------------------------------------------------------------------------------------------------------------------------------------------------------------------------------------------------------------------------------------------------------------------------------------------------------------------------|
| 678 | PS in DM only | PGSC0003DMG40000<br>4714 | PGSC0003DMT4000<br>12008 | chr01 | yes | NO | GO:0004506; squalene monooxygenase activity; Molecular Function<br>GO:0008033; tRNA processing; Biological Process<br>GO:0016021; integral to membrane; Cellular Component<br>GO:0016491; oxidoreductase activity; Molecular Function<br>GO:0050660; FAD binding; Molecular Function<br>GO:0055114; oxidation reduction; Biological Process |
| 679 | PS in DM only | PGSC0003DMG40000<br>4930 | PGSC0003DMT4000<br>12612 | -     | yes | NO | GO:0003676; nucleic acid binding; Molecular Function                                                                                                                                                                                                                                                                                        |
| 680 | PS in DM only | PGSC0003DMG40000<br>5236 | PGSC0003DMT4000<br>13426 | chr11 | yes | NO | GO:0005524; ATP binding; Molecular Function<br>GO:0006139; nucleobase, nucleoside, nucleotide and nucleic acid metabolic process; Biological Process<br>GO:0019205; nucleobase, nucleoside, nucleotide kinase activity; Molecular Function                                                                                                  |
| 681 | PS in DM only | PGSC0003DMG40000<br>5262 | PGSC0003DMT4000<br>13490 | chr04 | NO  | NO |                                                                                                                                                                                                                                                                                                                                             |
| 682 | PS in DM only | PGSC0003DMG40000<br>5347 | PGSC0003DMT4000<br>13679 | chr12 | NO  | NO |                                                                                                                                                                                                                                                                                                                                             |
| 683 | PS in DM only | PGSC0003DMG40000<br>5480 | PGSC0003DMT4000<br>13979 | chr04 | yes | NO |                                                                                                                                                                                                                                                                                                                                             |
| 684 | PS in DM only | PGSC0003DMG40000<br>5566 | PGSC0003DMT4000<br>14199 | -     | yes | NO |                                                                                                                                                                                                                                                                                                                                             |
| 685 | PS in DM only | PGSC0003DMG40300<br>5658 | PGSC0003DMT4000<br>14423 | chr01 | yes | NO |                                                                                                                                                                                                                                                                                                                                             |
| 686 | PS in DM only | PGSC0003DMG40000<br>5689 | PGSC0003DMT4000<br>14530 | chr02 | yes | NO | GO:0016702; oxidoreductase activity, acting on single donors with incorporation of molecular oxygen, incorporation of two atoms of oxygen; Molecular Function<br>GO:0046872; metal ion binding; Molecular Function<br>GO:0055114; oxidation reduction; Biological Process                                                                   |

|     |               |                          |                          |       |     |     |                                                                                                                                                                                                                |
|-----|---------------|--------------------------|--------------------------|-------|-----|-----|----------------------------------------------------------------------------------------------------------------------------------------------------------------------------------------------------------------|
| 687 | PS in DM only | PGSC0003DMG40000<br>6292 | PGSC0003DMT4000<br>16096 | chr07 | yes | NO  | GO:0004497; monooxygenase activity; Molecular Function GO:0005506; iron ion binding; Molecular Function GO:0009055; electron carrier activity; Molecular Function GO:0020037; heme binding; Molecular Function |
| 688 | PS in DM only | PGSC0003DMG40000<br>6297 | PGSC0003DMT4000<br>16107 | chr03 | yes | NO  |                                                                                                                                                                                                                |
| 689 | PS in DM only | PGSC0003DMG40000<br>6318 | PGSC0003DMT4000<br>16166 | chr07 | NO  | NO  |                                                                                                                                                                                                                |
| 690 | PS in DM only | PGSC0003DMG40000<br>6556 | PGSC0003DMT4000<br>16766 | chr06 | yes | NO  |                                                                                                                                                                                                                |
| 691 | PS in DM only | PGSC0003DMG40000<br>6760 | PGSC0003DMT4000<br>17381 | chr02 | yes | NO  | GO:0006508; proteolysis; Biological Process GO:0008234; cysteine-type peptidase activity; Molecular Function GO:0010181; FMN binding; Molecular Function                                                       |
| 692 | PS in DM only | PGSC0003DMG40000<br>6804 | PGSC0003DMT4000<br>17547 | chr06 | yes | yes |                                                                                                                                                                                                                |
| 693 | PS in DM only | PGSC0003DMG40000<br>7341 | PGSC0003DMT4000<br>18933 | chr07 | NO  | NO  |                                                                                                                                                                                                                |
| 694 | PS in DM only | PGSC0003DMG40000<br>7687 | PGSC0003DMT4000<br>19872 | chr05 | NO  | NO  |                                                                                                                                                                                                                |
| 695 | PS in DM only | PGSC0003DMG40000<br>8914 | PGSC0003DMT4000<br>23033 | chr04 | yes | yes | GO:0005622; intracellular; Cellular Component GO:0008270; zinc ion binding; Molecular Function                                                                                                                 |
| 696 | PS in DM only | PGSC0003DMG40200<br>8955 | PGSC0003DMT4000<br>23129 | chr05 | NO  | NO  | GO:0016758; transferase activity, transferring hexosyl groups; Molecular Function GO:0031227; intrinsic to endoplasmic reticulum membrane; Cellular Component                                                  |
| 697 | PS in DM only | PGSC0003DMG40000<br>9059 | PGSC0003DMT4000<br>23388 | chr03 | NO  | NO  |                                                                                                                                                                                                                |
| 698 | PS in DM only | PGSC0003DMG40000<br>9156 | PGSC0003DMT4000<br>23666 | chr01 | NO  | NO  |                                                                                                                                                                                                                |
| 699 | PS in DM only | PGSC0003DMG40000<br>9294 | PGSC0003DMT4000<br>24024 | -     | yes | NO  |                                                                                                                                                                                                                |
| 700 | PS in DM only | PGSC0003DMG40200<br>9322 | PGSC0003DMT4000<br>24106 | chr10 | NO  | NO  |                                                                                                                                                                                                                |

|     |               |                  |                 |       |     |     |                                                                                                                                                                                                                |
|-----|---------------|------------------|-----------------|-------|-----|-----|----------------------------------------------------------------------------------------------------------------------------------------------------------------------------------------------------------------|
| 701 | PS in DM only | PGSC0003DMG40000 | PGSC0003DMT4000 | chr10 | yes | NO  |                                                                                                                                                                                                                |
|     |               | 9747             | 25228           |       |     |     |                                                                                                                                                                                                                |
| 702 | PS in DM only | PGSC0003DMG40001 | PGSC0003DMT4000 | -     | NO  | NO  |                                                                                                                                                                                                                |
|     |               | 0043             | 26030           |       |     |     |                                                                                                                                                                                                                |
| 703 | PS in DM only | PGSC0003DMG40001 | PGSC0003DMT4000 | chr05 | yes | NO  | GO:0005524; ATP binding; Molecular Function                                                                                                                                                                    |
|     |               | 0336             | 26752           |       |     |     |                                                                                                                                                                                                                |
| 704 | PS in DM only | PGSC0003DMG40001 | PGSC0003DMT4000 | chr06 | yes | yes |                                                                                                                                                                                                                |
|     |               | 0546             | 27345           |       |     |     |                                                                                                                                                                                                                |
| 705 | PS in DM only | PGSC0003DMG40001 | PGSC0003DMT4000 | chr07 | yes | NO  | GO:0004497; monooxygenase activity; Molecular Function GO:0005506; iron ion binding; Molecular Function GO:0009055; electron carrier activity; Molecular Function GO:0020037; heme binding; Molecular Function |
|     |               | 0559             | 27382           |       |     |     |                                                                                                                                                                                                                |
| 706 | PS in DM only | PGSC0003DMG40001 | PGSC0003DMT4000 | chr06 | yes | NO  |                                                                                                                                                                                                                |
|     |               | 0604             | 27512           |       |     |     |                                                                                                                                                                                                                |
| 707 | PS in DM only | PGSC0003DMG40001 | PGSC0003DMT4000 | chr05 | yes | NO  |                                                                                                                                                                                                                |
|     |               | 0648             | 27611           |       |     |     |                                                                                                                                                                                                                |
| 708 | PS in DM only | PGSC0003DMG40001 | PGSC0003DMT4000 | chr07 | NO  | NO  |                                                                                                                                                                                                                |
|     |               | 0720             | 27841           |       |     |     |                                                                                                                                                                                                                |
| 709 | PS in DM only | PGSC0003DMG40001 | PGSC0003DMT4000 | chr01 | yes | NO  |                                                                                                                                                                                                                |
|     |               | 0741             | 27905           |       |     |     |                                                                                                                                                                                                                |
| 710 | PS in DM only | PGSC0003DMG40001 | PGSC0003DMT4000 | chr08 | yes | yes |                                                                                                                                                                                                                |
|     |               | 0813             | 28038           |       |     |     |                                                                                                                                                                                                                |
| 711 | PS in DM only | PGSC0003DMG40001 | PGSC0003DMT4000 | chr11 | NO  | NO  |                                                                                                                                                                                                                |
|     |               | 0946             | 28423           |       |     |     |                                                                                                                                                                                                                |
| 712 | PS in DM only | PGSC0003DMG40001 | PGSC0003DMT4000 | chr01 | yes | yes |                                                                                                                                                                                                                |
|     |               | 1035             | 28660           |       |     |     |                                                                                                                                                                                                                |
| 713 | PS in DM only | PGSC0003DMG40001 | PGSC0003DMT4000 | chr07 | NO  | NO  |                                                                                                                                                                                                                |
|     |               | 1236             | 29207           |       |     |     |                                                                                                                                                                                                                |
| 714 | PS in DM only | PGSC0003DMG40001 | PGSC0003DMT4000 | chr04 | NO  | NO  |                                                                                                                                                                                                                |
|     |               | 1623             | 30375           |       |     |     |                                                                                                                                                                                                                |
| 715 | PS in DM only | PGSC0003DMG40001 | PGSC0003DMT4000 | chr08 | yes | NO  |                                                                                                                                                                                                                |
|     |               | 2208             | 31822           |       |     |     |                                                                                                                                                                                                                |
| 716 | PS in DM only | PGSC0003DMG40001 | PGSC0003DMT4000 | chr04 | yes | yes |                                                                                                                                                                                                                |
|     |               | 2424             | 32345           |       |     |     |                                                                                                                                                                                                                |
| 717 | PS in DM only | PGSC0003DMG40001 | PGSC0003DMT4000 | chr01 | NO  | NO  |                                                                                                                                                                                                                |
|     |               | 2721             | 33129           |       |     |     |                                                                                                                                                                                                                |

|     |               |                          |                          |       |     |     |                                                                                                                                                                                                                                                                                                                                                                                                                                                                                       |
|-----|---------------|--------------------------|--------------------------|-------|-----|-----|---------------------------------------------------------------------------------------------------------------------------------------------------------------------------------------------------------------------------------------------------------------------------------------------------------------------------------------------------------------------------------------------------------------------------------------------------------------------------------------|
| 718 | PS in DM only | PGSC0003DMG40001<br>2863 | PGSC0003DMT4000<br>33485 | chr05 | yes | NO  |                                                                                                                                                                                                                                                                                                                                                                                                                                                                                       |
| 719 | PS in DM only | PGSC0003DMG40001<br>3428 | PGSC0003DMT4000<br>34931 | chr06 | yes | NO  | GO:0004601; peroxidase activity; Molecular Function GO:0005506; iron ion binding; Molecular Function GO:0009055; electron carrier activity; Molecular Function GO:0016021; integral to membrane; Cellular Component GO:0016491; oxidoreductase activity; Molecular Function GO:0050660; FAD binding; Molecular Function GO:0050664; oxidoreductase activity, acting on NADH or NADPH, with oxygen as acceptor; Molecular Function GO:0055114; oxidation reduction; Biological Process |
| 720 | PS in DM only | PGSC0003DMG40001<br>3498 | PGSC0003DMT4000<br>35105 | chr07 | NO  | NO  |                                                                                                                                                                                                                                                                                                                                                                                                                                                                                       |
| 721 | PS in DM only | PGSC0003DMG40001<br>3516 | PGSC0003DMT4000<br>35162 | chr07 | yes | NO  | GO:0005215; transporter activity; Molecular Function GO:0006857; oligopeptide transport; Biological Process GO:0016020; membrane; Cellular Component                                                                                                                                                                                                                                                                                                                                  |
| 722 | PS in DM only | PGSC0003DMG40001<br>3899 | PGSC0003DMT4000<br>36088 | chr02 | NO  | NO  |                                                                                                                                                                                                                                                                                                                                                                                                                                                                                       |
| 723 | PS in DM only | PGSC0003DMG40001<br>4132 | PGSC0003DMT4000<br>36640 | chr01 | yes | yes | GO:0006508; proteolysis; Biological Process GO:0008237; metallopeptidase activity; Molecular Function                                                                                                                                                                                                                                                                                                                                                                                 |
| 724 | PS in DM only | PGSC0003DMG40001<br>4137 | PGSC0003DMT4000<br>36646 | -     | NO  | NO  |                                                                                                                                                                                                                                                                                                                                                                                                                                                                                       |
| 725 | PS in DM only | PGSC0003DMG40201<br>4139 | PGSC0003DMT4000<br>36657 | chr02 | yes | NO  |                                                                                                                                                                                                                                                                                                                                                                                                                                                                                       |
| 726 | PS in DM only | PGSC0003DMG40001<br>4153 | PGSC0003DMT4000<br>36697 | chr03 | yes | NO  | GO:0004497; monooxygenase activity; Molecular Function GO:0005506; iron ion binding; Molecular Function GO:0009055; electron carrier activity; Molecular Function GO:0020037; heme binding; Molecular Function                                                                                                                                                                                                                                                                        |

|     |               |                  |                 |       |     |     |                                                                                                                                                                                                                                  |
|-----|---------------|------------------|-----------------|-------|-----|-----|----------------------------------------------------------------------------------------------------------------------------------------------------------------------------------------------------------------------------------|
| 727 | PS in DM only | PGSC0003DMG40001 | PGSC0003DMT4000 | chr09 | yes | NO  |                                                                                                                                                                                                                                  |
|     |               | 4231             | 36919           |       |     |     |                                                                                                                                                                                                                                  |
| 728 | PS in DM only | PGSC0003DMG40001 | PGSC0003DMT4000 | chr10 | yes | yes |                                                                                                                                                                                                                                  |
|     |               | 4314             | 37130           |       |     |     |                                                                                                                                                                                                                                  |
| 729 | PS in DM only | PGSC0003DMG40001 | PGSC0003DMT4000 | -     | NO  | NO  |                                                                                                                                                                                                                                  |
|     |               | 4382             | 37280           |       |     |     |                                                                                                                                                                                                                                  |
| 730 | PS in DM only | PGSC0003DMG40001 | PGSC0003DMT4000 | chr12 | NO  | NO  |                                                                                                                                                                                                                                  |
|     |               | 4492             | 37569           |       |     |     |                                                                                                                                                                                                                                  |
| 731 | PS in DM only | PGSC0003DMG40001 | PGSC0003DMT4000 | chr03 | yes | NO  | GO:0004672; protein kinase activity; Molecular Function GO:0005488; binding; Molecular Function GO:0005524; ATP binding; Molecular Function GO:0006468; protein amino acid phosphorylation; Biological Process                   |
|     |               | 4562             | 37748           |       |     |     |                                                                                                                                                                                                                                  |
| 732 | PS in DM only | PGSC0003DMG40001 | PGSC0003DMT4000 | chr08 | yes | yes |                                                                                                                                                                                                                                  |
|     |               | 4693             | 38105           |       |     |     |                                                                                                                                                                                                                                  |
| 733 | PS in DM only | PGSC0003DMG40001 | PGSC0003DMT4000 | -     | yes | yes | GO:0004888; transmembrane receptor activity; Molecular Function GO:0007165; signal transduction; Biological Process GO:0031224; intrinsic to membrane; Cellular Component GO:0045087; innate immune response; Biological Process |
|     |               | 5646             | 40413           |       |     |     |                                                                                                                                                                                                                                  |
| 734 | PS in DM only | PGSC0003DMG40201 | PGSC0003DMT4000 | -     | NO  | NO  |                                                                                                                                                                                                                                  |
|     |               | 5717             | 40654           |       |     |     |                                                                                                                                                                                                                                  |
| 735 | PS in DM only | PGSC0003DMG40001 | PGSC0003DMT4000 | chr10 | NO  | NO  |                                                                                                                                                                                                                                  |
|     |               | 5784             | 40816           |       |     |     |                                                                                                                                                                                                                                  |
| 736 | PS in DM only | PGSC0003DMG40001 | PGSC0003DMT4000 | chr07 | NO  | NO  |                                                                                                                                                                                                                                  |
|     |               | 5801             | 40868           |       |     |     |                                                                                                                                                                                                                                  |
| 737 | PS in DM only | PGSC0003DMG40001 | PGSC0003DMT4000 | -     | yes | NO  |                                                                                                                                                                                                                                  |
|     |               | 6372             | 42194           |       |     |     |                                                                                                                                                                                                                                  |
| 738 | PS in DM only | PGSC0003DMG40001 | PGSC0003DMT4000 | chr05 | yes | NO  | GO:0003700; transcription factor activity; Molecular Function GO:0043565; sequence-specific DNA binding; Molecular Function GO:0045449; regulation of transcription; Biological Process                                          |
|     |               | 6524             | 42609           |       |     |     |                                                                                                                                                                                                                                  |

|     |               |                          |                          |       |     |     |                                                                                                                                                                                                                                                                                                   |
|-----|---------------|--------------------------|--------------------------|-------|-----|-----|---------------------------------------------------------------------------------------------------------------------------------------------------------------------------------------------------------------------------------------------------------------------------------------------------|
| 739 | PS in DM only | PGSC0003DMG40001<br>6827 | PGSC0003DMT4000<br>43339 | chr01 | NO  | NO  |                                                                                                                                                                                                                                                                                                   |
| 740 | PS in DM only | PGSC0003DMG40001<br>6844 | PGSC0003DMT4000<br>43395 | chr10 | NO  | NO  | GO:0008152; metabolic process;<br>Biological Process GO:0016491;<br>oxidoreductase activity; Molecular<br>Function                                                                                                                                                                                |
| 741 | PS in DM only | PGSC0003DMG40101<br>6929 | PGSC0003DMT4000<br>43597 | chr12 | yes | yes |                                                                                                                                                                                                                                                                                                   |
| 742 | PS in DM only | PGSC0003DMG40001<br>7272 | PGSC0003DMT4000<br>44497 | chr11 | yes | yes |                                                                                                                                                                                                                                                                                                   |
| 743 | PS in DM only | PGSC0003DMG40001<br>7528 | PGSC0003DMT4000<br>45191 | chr11 | NO  | NO  | GO:0003824; catalytic activity; Molecular<br>Function GO:0009252; peptidoglycan<br>biosynthetic process; Biological Process<br>GO:0009274; peptidoglycan-based cell<br>wall; Cellular Component                                                                                                   |
| 744 | PS in DM only | PGSC0003DMG40001<br>7628 | PGSC0003DMT4000<br>45443 | chr09 | yes | NO  | GO:0015205; nucleobase transmembrane<br>transporter activity; Molecular Function<br>GO:0015931; nucleobase, nucleoside,<br>nucleotide and nucleic acid transport;<br>Biological Process GO:0016020;<br>membrane; Cellular Component<br>GO:0055085; transmembrane transport;<br>Biological Process |
| 745 | PS in DM only | PGSC0003DMG40001<br>7785 | PGSC0003DMT4000<br>45850 | chr06 | NO  | NO  |                                                                                                                                                                                                                                                                                                   |
| 746 | PS in DM only | PGSC0003DMG40001<br>7883 | PGSC0003DMT4000<br>46080 | -     | yes | NO  | GO:0005515; protein binding; Molecular<br>Function                                                                                                                                                                                                                                                |
| 747 | PS in DM only | PGSC0003DMG40001<br>7916 | PGSC0003DMT4000<br>46156 | chr08 | yes | NO  |                                                                                                                                                                                                                                                                                                   |
| 748 | PS in DM only | PGSC0003DMG40001<br>8527 | PGSC0003DMT4000<br>47665 | chr11 | NO  | NO  |                                                                                                                                                                                                                                                                                                   |
| 749 | PS in DM only | PGSC0003DMG40001<br>8565 | PGSC0003DMT4000<br>47760 | chr01 | NO  | NO  | GO:0045735; nutrient reservoir activity;<br>Molecular Function                                                                                                                                                                                                                                    |
| 750 | PS in DM only | PGSC0003DMG40101<br>8603 | PGSC0003DMT4000<br>47866 | chr12 | NO  | NO  |                                                                                                                                                                                                                                                                                                   |
| 751 | PS in DM only | PGSC0003DMG40001<br>8820 | PGSC0003DMT4000<br>48455 | chr04 | yes | yes |                                                                                                                                                                                                                                                                                                   |

|     |               |                          |                          |       |     |    |                                                                                                                                                                                                                                                                                                                                                                                          |
|-----|---------------|--------------------------|--------------------------|-------|-----|----|------------------------------------------------------------------------------------------------------------------------------------------------------------------------------------------------------------------------------------------------------------------------------------------------------------------------------------------------------------------------------------------|
| 752 | PS in DM only | PGSC0003DMG40001<br>9113 | PGSC0003DMT4000<br>49172 | chr12 | NO  | NO | GO:0016747; transferase activity, transferring acyl groups other than amino-acyl groups; Molecular Function                                                                                                                                                                                                                                                                              |
| 753 | PS in DM only | PGSC0003DMG40001<br>9578 | PGSC0003DMT4000<br>50367 | chr01 | yes | NO | GO:0004888; transmembrane receptor activity; Molecular Function<br>GO:0005515; protein binding; Molecular Function<br>GO:0005524; ATP binding; Molecular Function<br>GO:0006915; apoptosis; Biological Process<br>GO:0007165; signal transduction; Biological Process<br>GO:0031224; intrinsic to membrane; Cellular Component<br>GO:0045087; innate immune response; Biological Process |
| 754 | PS in DM only | PGSC0003DMG40001<br>9800 | PGSC0003DMT4000<br>50984 | -     | NO  | NO |                                                                                                                                                                                                                                                                                                                                                                                          |
| 755 | PS in DM only | PGSC0003DMG40001<br>9943 | PGSC0003DMT4000<br>51347 | chr08 | yes | NO |                                                                                                                                                                                                                                                                                                                                                                                          |
| 756 | PS in DM only | PGSC0003DMG40001<br>9953 | PGSC0003DMT4000<br>51368 | chr10 | NO  | NO |                                                                                                                                                                                                                                                                                                                                                                                          |
| 757 | PS in DM only | PGSC0003DMG40002<br>0045 | PGSC0003DMT4000<br>51614 | chr03 | NO  | NO |                                                                                                                                                                                                                                                                                                                                                                                          |
| 758 | PS in DM only | PGSC0003DMG40302<br>0339 | PGSC0003DMT4000<br>52398 | chr08 | yes | NO |                                                                                                                                                                                                                                                                                                                                                                                          |
| 759 | PS in DM only | PGSC0003DMG40002<br>0833 | PGSC0003DMT4000<br>53696 | chr03 | NO  | NO |                                                                                                                                                                                                                                                                                                                                                                                          |
| 760 | PS in DM only | PGSC0003DMG40002<br>1000 | PGSC0003DMT4000<br>54146 | chr06 | NO  | NO |                                                                                                                                                                                                                                                                                                                                                                                          |
| 761 | PS in DM only | PGSC0003DMG40002<br>1135 | PGSC0003DMT4000<br>54453 | chr05 | yes | NO | GO:0008152; metabolic process; Biological Process<br>GO:0016758; transferase activity, transferring hexosyl groups; Molecular Function                                                                                                                                                                                                                                                   |
| 762 | PS in DM only | PGSC0003DMG40002<br>1238 | PGSC0003DMT4000<br>54695 | -     | NO  | NO |                                                                                                                                                                                                                                                                                                                                                                                          |
| 763 | PS in DM only | PGSC0003DMG40002<br>1244 | PGSC0003DMT4000<br>54721 | chr01 | yes | NO |                                                                                                                                                                                                                                                                                                                                                                                          |



|     |               |                          |                          |       |     |     |                                                                                                                                                                                        |
|-----|---------------|--------------------------|--------------------------|-------|-----|-----|----------------------------------------------------------------------------------------------------------------------------------------------------------------------------------------|
| 764 | PS in DM only | PGSC0003DMG40002<br>1314 | PGSC0003DMT4000<br>54929 | -     | yes | NO  | GO:0008152; metabolic process;<br>Biological Process GO:0016758;<br>transferase activity, transferring hexosyl<br>groups; Molecular Function                                           |
| 765 | PS in DM only | PGSC0003DMG40002<br>1343 | PGSC0003DMT4000<br>54994 | chr04 | yes | yes |                                                                                                                                                                                        |
| 766 | PS in DM only | PGSC0003DMG40102<br>1412 | PGSC0003DMT4000<br>55168 | chr09 | yes | NO  |                                                                                                                                                                                        |
| 767 | PS in DM only | PGSC0003DMG40002<br>1433 | PGSC0003DMT4000<br>55216 | chr05 | yes | NO  | GO:0005622; intracellular; Cellular<br>Component GO:0006464; protein<br>modification process; Biological Process<br>GO:0016881; acid-amino acid ligase<br>activity; Molecular Function |
| 768 | PS in DM only | PGSC0003DMG40202<br>1491 | PGSC0003DMT4000<br>55358 | chr02 | NO  | NO  | GO:0004806; triacylglycerol lipase<br>activity; Molecular Function<br>GO:0006629; lipid metabolic process;<br>Biological Process                                                       |
| 769 | PS in DM only | PGSC0003DMG40002<br>1541 | PGSC0003DMT4000<br>55477 | chr06 | NO  | NO  |                                                                                                                                                                                        |
| 770 | PS in DM only | PGSC0003DMG40002<br>1560 | PGSC0003DMT4000<br>55522 | chr12 | NO  | NO  |                                                                                                                                                                                        |
| 771 | PS in DM only | PGSC0003DMG40002<br>1688 | PGSC0003DMT4000<br>55839 | chr08 | yes | NO  |                                                                                                                                                                                        |
| 772 | PS in DM only | PGSC0003DMG40002<br>1863 | PGSC0003DMT4000<br>56268 | -     | yes | NO  | GO:0004672; protein kinase activity;<br>Molecular Function GO:0005524; ATP<br>binding; Molecular Function<br>GO:0006468; protein amino acid<br>phosphorylation; Biological Process     |
| 773 | PS in DM only | PGSC0003DMG40002<br>2141 | PGSC0003DMT4000<br>56940 | chr01 | yes | NO  |                                                                                                                                                                                        |
| 774 | PS in DM only | PGSC0003DMG40002<br>2217 | PGSC0003DMT4000<br>57197 | chr08 | yes | yes |                                                                                                                                                                                        |
| 775 | PS in DM only | PGSC0003DMG40002<br>2221 | PGSC0003DMT4000<br>57204 | chr12 | NO  | NO  |                                                                                                                                                                                        |
| 776 | PS in DM only | PGSC0003DMG40002<br>2359 | PGSC0003DMT4000<br>57581 | -     | yes | NO  |                                                                                                                                                                                        |
| 777 | PS in DM only | PGSC0003DMG40202<br>2539 | PGSC0003DMT4000<br>58058 | chr06 | NO  | NO  |                                                                                                                                                                                        |

|     |               |                  |                 |       |     |     |                                                                                                                                                                                                                                           |
|-----|---------------|------------------|-----------------|-------|-----|-----|-------------------------------------------------------------------------------------------------------------------------------------------------------------------------------------------------------------------------------------------|
| 778 | PS in DM only | PGSC0003DMG40002 | PGSC0003DMT4000 | chr04 | NO  | NO  |                                                                                                                                                                                                                                           |
|     |               | 2562             | 58126           |       |     |     |                                                                                                                                                                                                                                           |
| 779 | PS in DM only | PGSC0003DMG40002 | PGSC0003DMT4000 | -     | NO  | NO  |                                                                                                                                                                                                                                           |
|     |               | 2574             | 58159           |       |     |     |                                                                                                                                                                                                                                           |
| 780 | PS in DM only | PGSC0003DMG40002 | PGSC0003DMT4000 | chr08 | yes | yes |                                                                                                                                                                                                                                           |
|     |               | 2730             | 58520           |       |     |     |                                                                                                                                                                                                                                           |
| 781 | PS in DM only | PGSC0003DMG40002 | PGSC0003DMT4000 | chr01 | yes | yes | GO:0005515; protein binding; Molecular Function                                                                                                                                                                                           |
|     |               | 2750             | 58564           |       |     |     |                                                                                                                                                                                                                                           |
| 782 | PS in DM only | PGSC0003DMG40002 | PGSC0003DMT4000 | chr09 | yes | NO  | GO:0008146; sulfotransferase activity; Molecular Function                                                                                                                                                                                 |
|     |               | 2977             | 59155           |       |     |     |                                                                                                                                                                                                                                           |
| 783 | PS in DM only | PGSC0003DMG40002 | PGSC0003DMT4000 | chr05 | NO  | NO  |                                                                                                                                                                                                                                           |
|     |               | 3210             | 59701           |       |     |     |                                                                                                                                                                                                                                           |
| 784 | PS in DM only | PGSC0003DMG40002 | PGSC0003DMT4000 | chr03 | NO  | NO  |                                                                                                                                                                                                                                           |
|     |               | 3556             | 60553           |       |     |     |                                                                                                                                                                                                                                           |
| 785 | PS in DM only | PGSC0003DMG40002 | PGSC0003DMT4000 | chr02 | yes | NO  |                                                                                                                                                                                                                                           |
|     |               | 3712             | 60959           |       |     |     |                                                                                                                                                                                                                                           |
| 786 | PS in DM only | PGSC0003DMG40002 | PGSC0003DMT4000 | -     | yes | NO  | GO:0004888; transmembrane receptor activity; Molecular Function<br>GO:0007165; signal transduction;<br>Biological Process GO:0031224; intrinsic to membrane; Cellular Component<br>GO:0045087; innate immune response; Biological Process |
|     |               | 3736             | 61007           |       |     |     |                                                                                                                                                                                                                                           |
| 787 | PS in DM only | PGSC0003DMG40002 | PGSC0003DMT4000 | -     | NO  | NO  |                                                                                                                                                                                                                                           |
|     |               | 3766             | 61082           |       |     |     |                                                                                                                                                                                                                                           |
| 788 | PS in DM only | PGSC0003DMG40002 | PGSC0003DMT4000 | chr08 | NO  | NO  |                                                                                                                                                                                                                                           |
|     |               | 4021             | 61719           |       |     |     |                                                                                                                                                                                                                                           |
| 789 | PS in DM only | PGSC0003DMG40002 | PGSC0003DMT4000 | chr05 | yes | NO  |                                                                                                                                                                                                                                           |
|     |               | 4036             | 61760           |       |     |     |                                                                                                                                                                                                                                           |
| 790 | PS in DM only | PGSC0003DMG40002 | PGSC0003DMT4000 | chr02 | yes | NO  |                                                                                                                                                                                                                                           |
|     |               | 4037             | 61767           |       |     |     |                                                                                                                                                                                                                                           |

|     |               |                          |                          |       |     |     |                                                                                                                                                                                                                                                                                                                                                     |
|-----|---------------|--------------------------|--------------------------|-------|-----|-----|-----------------------------------------------------------------------------------------------------------------------------------------------------------------------------------------------------------------------------------------------------------------------------------------------------------------------------------------------------|
| 791 | PS in DM only | PGSC0003DMG40002<br>4061 | PGSC0003DMT4000<br>61842 | chr09 | NO  | NO  | GO:0003700; transcription factor activity; Molecular Function GO:0005634; nucleus; Cellular Component GO:0006355; regulation of transcription, DNA-dependent; Biological Process GO:0043565; sequence-specific DNA binding; Molecular Function                                                                                                      |
| 792 | PS in DM only | PGSC0003DMG40002<br>4075 | PGSC0003DMT4000<br>61875 | chr01 | NO  | NO  |                                                                                                                                                                                                                                                                                                                                                     |
| 793 | PS in DM only | PGSC0003DMG40202<br>4077 | PGSC0003DMT4000<br>61881 | chr09 | NO  | NO  |                                                                                                                                                                                                                                                                                                                                                     |
| 794 | PS in DM only | PGSC0003DMG40002<br>4273 | PGSC0003DMT4000<br>62366 | chr11 | NO  | NO  | GO:0005524; ATP binding; Molecular Function GO:0006810; transport; Biological Process GO:0016021; integral to membrane; Cellular Component GO:0016887; ATPase activity; Molecular Function GO:0042626; ATPase activity, coupled to transmembrane movement of substances; Molecular Function GO:0055085; transmembrane transport; Biological Process |
| 795 | PS in DM only | PGSC0003DMG40002<br>4646 | PGSC0003DMT4000<br>63357 | chr05 | NO  | NO  |                                                                                                                                                                                                                                                                                                                                                     |
| 796 | PS in DM only | PGSC0003DMG40002<br>4682 | PGSC0003DMT4000<br>63430 | chr05 | yes | yes | GO:0005086; ARF guanyl-nucleotide exchange factor activity; Molecular Function GO:0005622; intracellular; Cellular Component GO:0032012; regulation of ARF protein signal transduction; Biological Process                                                                                                                                          |
| 797 | PS in DM only | PGSC0003DMG40002<br>4835 | PGSC0003DMT4000<br>63898 | chr12 | yes | NO  |                                                                                                                                                                                                                                                                                                                                                     |
| 798 | PS in DM only | PGSC0003DMG40002<br>4880 | PGSC0003DMT4000<br>64010 | chr07 | NO  | NO  |                                                                                                                                                                                                                                                                                                                                                     |
| 799 | PS in DM only | PGSC0003DMG40002<br>4952 | PGSC0003DMT4000<br>64226 | chr05 | yes | NO  |                                                                                                                                                                                                                                                                                                                                                     |
| 800 | PS in DM only | PGSC0003DMG40002<br>4994 | PGSC0003DMT4000<br>64329 | chr09 | NO  | NO  | GO:0003676; nucleic acid binding; Molecular Function                                                                                                                                                                                                                                                                                                |

|     |               |                  |                 |       |     |     |                                                                                                                                     |
|-----|---------------|------------------|-----------------|-------|-----|-----|-------------------------------------------------------------------------------------------------------------------------------------|
| 801 | PS in DM only | PGSC0003DMG40002 | PGSC0003DMT4000 | chr07 | yes | NO  |                                                                                                                                     |
|     |               | 5100             | 64590           |       |     |     |                                                                                                                                     |
| 802 | PS in DM only | PGSC0003DMG40002 | PGSC0003DMT4000 | chr12 | yes | NO  |                                                                                                                                     |
|     |               | 5113             | 64635           |       |     |     |                                                                                                                                     |
| 803 | PS in DM only | PGSC0003DMG40002 | PGSC0003DMT4000 | chr04 | NO  | NO  |                                                                                                                                     |
|     |               | 5267             | 65035           |       |     |     |                                                                                                                                     |
| 804 | PS in DM only | PGSC0003DMG40002 | PGSC0003DMT4000 | chr09 | NO  | NO  |                                                                                                                                     |
|     |               | 5584             | 65736           |       |     |     |                                                                                                                                     |
| 805 | PS in DM only | PGSC0003DMG40202 | PGSC0003DMT4000 | chr11 | NO  | NO  |                                                                                                                                     |
|     |               | 5828             | 66424           |       |     |     |                                                                                                                                     |
| 806 | PS in DM only | PGSC0003DMG40002 | PGSC0003DMT4000 | chr05 | yes | NO  | GO:0005524; ATP binding; Molecular Function GO:0006915; apoptosis; Biological Process                                               |
|     |               | 5864             | 66550           |       |     |     |                                                                                                                                     |
| 807 | PS in DM only | PGSC0003DMG40102 | PGSC0003DMT4000 |       |     |     |                                                                                                                                     |
|     |               | 5908             | 66676           |       |     |     |                                                                                                                                     |
| 808 | PS in DM only | PGSC0003DMG40002 | PGSC0003DMT4000 | chr04 | yes | NO  |                                                                                                                                     |
|     |               | 5940             | 66745           |       |     |     |                                                                                                                                     |
| 809 | PS in DM only | PGSC0003DMG40002 | PGSC0003DMT4000 | chr01 | yes | NO  | GO:0016747; transferase activity, transferring acyl groups other than amino-acyl groups; Molecular Function                         |
|     |               | 6167             | 67292           |       |     |     |                                                                                                                                     |
| 810 | PS in DM only | PGSC0003DMG40002 | PGSC0003DMT4000 | chr08 | NO  | NO  | GO:0004252; serine-type endopeptidase activity; Molecular Function                                                                  |
|     |               | 6243             | 67496           |       |     |     | GO:0006508; proteolysis; Biological Process GO:0042802; identical protein binding; Molecular Function                               |
|     |               |                  |                 |       |     |     | GO:0043086; negative regulation of catalytic activity; Biological Process                                                           |
| 811 | PS in DM only | PGSC0003DMG40002 | PGSC0003DMT4000 | chr12 | yes | yes |                                                                                                                                     |
|     |               | 6475             | 68074           |       |     |     |                                                                                                                                     |
| 812 | PS in DM only | PGSC0003DMG40002 | PGSC0003DMT4000 | chr05 | yes | NO  | GO:0008152; metabolic process; Biological Process GO:0016758; transferase activity, transferring hexosyl groups; Molecular Function |
|     |               | 6491             | 68109           |       |     |     |                                                                                                                                     |
| 813 | PS in DM only | PGSC0003DMG40002 | PGSC0003DMT4000 | chr03 | NO  | NO  |                                                                                                                                     |
|     |               | 6711             | 68698           |       |     |     |                                                                                                                                     |
| 814 | PS in DM only | PGSC0003DMG40002 | PGSC0003DMT4000 | chr06 | NO  | NO  |                                                                                                                                     |
|     |               | 6990             | 69420           |       |     |     |                                                                                                                                     |

|     |               |                  |                 |       |     |     |                                                                                                                                                                                                                                                                        |  |
|-----|---------------|------------------|-----------------|-------|-----|-----|------------------------------------------------------------------------------------------------------------------------------------------------------------------------------------------------------------------------------------------------------------------------|--|
| 815 | PS in DM only | PGSC0003DMG40002 | PGSC0003DMT4000 |       |     |     |                                                                                                                                                                                                                                                                        |  |
|     |               | 7075             | 69641           |       |     |     |                                                                                                                                                                                                                                                                        |  |
| 816 | PS in DM only | PGSC0003DMG40102 | PGSC0003DMT4000 | -     | yes | NO  |                                                                                                                                                                                                                                                                        |  |
|     |               | 7084             | 69666           |       |     |     |                                                                                                                                                                                                                                                                        |  |
| 817 | PS in DM only | PGSC0003DMG40002 | PGSC0003DMT4000 | chr01 | yes | NO  |                                                                                                                                                                                                                                                                        |  |
|     |               | 7162             | 69848           |       |     |     |                                                                                                                                                                                                                                                                        |  |
| 818 | PS in DM only | PGSC0003DMG40102 | PGSC0003DMT4000 | chr06 | NO  | NO  |                                                                                                                                                                                                                                                                        |  |
|     |               | 7210             | 69970           |       |     |     |                                                                                                                                                                                                                                                                        |  |
| 819 | PS in DM only | PGSC0003DMG40002 | PGSC0003DMT4000 | chr07 | yes | NO  | GO:0004497; monooxygenase activity; Molecular Function GO:0005506; iron ion binding; Molecular Function GO:0009055; electron carrier activity; Molecular Function GO:0020037; heme binding; Molecular Function GO:0016491; oxidoreductase activity; Molecular Function |  |
|     |               | 7339             | 70314           |       |     |     |                                                                                                                                                                                                                                                                        |  |
| 820 | PS in DM only | PGSC0003DMG40002 | PGSC0003DMT4000 | chr09 | yes | NO  | GO:0003700; transcription factor activity; Molecular Function GO:0043565; sequence-specific DNA binding; Molecular Function GO:0045449; regulation of transcription; Biological Process                                                                                |  |
|     |               | 7572             | 70909           |       |     |     |                                                                                                                                                                                                                                                                        |  |
| 821 | PS in DM only | PGSC0003DMG40002 | PGSC0003DMT4000 | -     | NO  | NO  |                                                                                                                                                                                                                                                                        |  |
|     |               | 7862             | 71626           |       |     |     |                                                                                                                                                                                                                                                                        |  |
| 822 | PS in DM only | PGSC0003DMG40002 | PGSC0003DMT4000 | chr10 | NO  | NO  |                                                                                                                                                                                                                                                                        |  |
|     |               | 7962             | 71865           |       |     |     |                                                                                                                                                                                                                                                                        |  |
| 823 | PS in DM only | PGSC0003DMG40002 | PGSC0003DMT4000 | chr07 | yes | NO  |                                                                                                                                                                                                                                                                        |  |
|     |               | 8194             | 72467           |       |     |     |                                                                                                                                                                                                                                                                        |  |
| 824 | PS in DM only | PGSC0003DMG40002 | PGSC0003DMT4000 | chr02 | NO  | NO  |                                                                                                                                                                                                                                                                        |  |
|     |               | 8401             | 73015           |       |     |     |                                                                                                                                                                                                                                                                        |  |
| 825 | PS in DM only | PGSC0003DMG40202 | PGSC0003DMT4000 | chr06 | yes | NO  |                                                                                                                                                                                                                                                                        |  |
|     |               | 8496             | 73327           |       |     |     |                                                                                                                                                                                                                                                                        |  |
| 826 | PS in DM only | PGSC0003DMG40302 | PGSC0003DMT4000 | chr01 | NO  | NO  | GO:0016747; transferase activity, transferring acyl groups other than amino-acyl groups; Molecular Function                                                                                                                                                            |  |
|     |               | 8522             | 73404           |       |     |     |                                                                                                                                                                                                                                                                        |  |
| 827 | PS in DM only | PGSC0003DMG40102 | PGSC0003DMT4000 | chr09 | NO  | NO  |                                                                                                                                                                                                                                                                        |  |
|     |               | 8731             | 73934           |       |     |     |                                                                                                                                                                                                                                                                        |  |
| 828 | PS in DM only | PGSC0003DMG40002 | PGSC0003DMT4000 | -     | yes | yes |                                                                                                                                                                                                                                                                        |  |
|     |               | 8742             | 73963           |       |     |     |                                                                                                                                                                                                                                                                        |  |

|     |               |                          |                          |       |     |     |                                                                                                                                                                                                                          |
|-----|---------------|--------------------------|--------------------------|-------|-----|-----|--------------------------------------------------------------------------------------------------------------------------------------------------------------------------------------------------------------------------|
| 829 | PS in DM only | PGSC0003DMG40002<br>9229 | PGSC0003DMT4000<br>75135 | chr03 | yes | NO  | GO:0003924; GTPase activity; Molecular Function GO:0005525; GTP binding; Molecular Function                                                                                                                              |
| 830 | PS in DM only | PGSC0003DMG40002<br>9276 | PGSC0003DMT4000<br>75273 | -     | yes | yes |                                                                                                                                                                                                                          |
| 831 | PS in DM only | PGSC0003DMG40002<br>9297 | PGSC0003DMT4000<br>75333 | -     | NO  | NO  |                                                                                                                                                                                                                          |
| 832 | PS in DM only | PGSC0003DMG40002<br>9350 | PGSC0003DMT4000<br>75463 | chr05 | NO  | NO  |                                                                                                                                                                                                                          |
| 833 | PS in DM only | PGSC0003DMG40002<br>9376 | PGSC0003DMT4000<br>75540 | chr08 | yes | NO  |                                                                                                                                                                                                                          |
| 834 | PS in DM only | PGSC0003DMG40002<br>9574 | PGSC0003DMT4000<br>76052 | chr08 | NO  | NO  |                                                                                                                                                                                                                          |
| 835 | PS in DM only | PGSC0003DMG40002<br>9606 | PGSC0003DMT4000<br>76145 | chr09 | yes | yes |                                                                                                                                                                                                                          |
| 836 | PS in DM only | PGSC0003DMG40002<br>9872 | PGSC0003DMT4000<br>76803 | chr10 | yes | NO  | GO:0005215; transporter activity; Molecular Function GO:0006857; oligopeptide transport; Biological Process GO:0016020; membrane; Cellular Component                                                                     |
| 837 | PS in DM only | PGSC0003DMG40002<br>9922 | PGSC0003DMT4000<br>76933 | chr06 | yes | yes |                                                                                                                                                                                                                          |
| 838 | PS in DM only | PGSC0003DMG40003<br>0079 | PGSC0003DMT4000<br>77337 | chr02 | NO  | NO  | GO:0005634; nucleus; Cellular Component GO:0006334; nucleosome assembly; Biological Process                                                                                                                              |
| 839 | PS in DM only | PGSC0003DMG40003<br>0441 | PGSC0003DMT4000<br>78227 | chr11 | yes | NO  |                                                                                                                                                                                                                          |
| 840 | PS in DM only | PGSC0003DMG40003<br>0985 | PGSC0003DMT4000<br>79573 | chr04 | yes | NO  |                                                                                                                                                                                                                          |
| 841 | PS in DM only | PGSC0003DMG40003<br>1236 | PGSC0003DMT4000<br>80247 | chr02 | NO  | NO  | GO:0004298; threonine-type endopeptidase activity; Molecular Function GO:0005839; proteasome core complex; Cellular Component GO:0051603; proteolysis involved in cellular protein catabolic process; Biological Process |

|     |               |                          |                          |       |     |    |                                                                                                                                                                                                                                                |
|-----|---------------|--------------------------|--------------------------|-------|-----|----|------------------------------------------------------------------------------------------------------------------------------------------------------------------------------------------------------------------------------------------------|
| 842 | PS in DM only | PGSC0003DMG40003<br>2496 | PGSC0003DMT4000<br>82356 | chr07 | yes | NO | GO:0003824; catalytic activity; Molecular Function GO:0008152; metabolic process; Biological Process                                                                                                                                           |
| 843 | PS in DM only | PGSC0003DMG40003<br>3645 | PGSC0003DMT4000<br>83893 | chr12 | yes | NO | GO:0003677; DNA binding; Molecular Function GO:0004518; nuclease activity; Molecular Function GO:0006289; nucleotide-excision repair; Biological Process                                                                                       |
| 844 | PS in DM only | PGSC0003DMG40003<br>3673 | PGSC0003DMT4000<br>83948 | chr03 | NO  | NO | GO:0003700; transcription factor activity; Molecular Function GO:0005634; nucleus; Cellular Component GO:0006355; regulation of transcription, DNA-dependent; Biological Process GO:0043565; sequence-specific DNA binding; Molecular Function |
| 845 | PS in DM only | PGSC0003DMG40003<br>3681 | PGSC0003DMT4000<br>83956 | chr04 | NO  | NO |                                                                                                                                                                                                                                                |
| 846 | PS in DM only | PGSC0003DMG40003<br>4493 | PGSC0003DMT4000<br>84922 | chr02 | yes | NO | GO:0003677; DNA binding; Molecular Function GO:0005524; ATP binding; Molecular Function GO:0006260; DNA replication; Biological Process                                                                                                        |
| 847 | PS in DM only | PGSC0003DMG40003<br>4577 | PGSC0003DMT4000<br>85006 | chr10 | NO  | NO |                                                                                                                                                                                                                                                |
| 848 | PS in DM only | PGSC0003DMG40003<br>4851 | PGSC0003DMT4000<br>85280 | chr06 | NO  | NO | GO:0004497; monooxygenase activity; Molecular Function GO:0005506; iron ion binding; Molecular Function GO:0009055; electron carrier activity; Molecular Function GO:0020037; heme binding; Molecular Function                                 |
| 849 | PS in DM only | PGSC0003DMG40003<br>5004 | PGSC0003DMT4000<br>85433 | chr01 | yes | NO | GO:0005515; protein binding; Molecular Function GO:0005524; ATP binding; Molecular Function GO:0006915; apoptosis; Biological Process                                                                                                          |
| 850 | PS in DM only | PGSC0003DMG40003<br>5355 | PGSC0003DMT4000<br>85784 | chr10 | NO  | NO |                                                                                                                                                                                                                                                |

|     |               |                          |                          |       |     |    |                                                                                                                                                                                                                                |
|-----|---------------|--------------------------|--------------------------|-------|-----|----|--------------------------------------------------------------------------------------------------------------------------------------------------------------------------------------------------------------------------------|
| 851 | PS in DM only | PGSC0003DMG40003<br>5363 | PGSC0003DMT4000<br>85792 | chr06 | yes | NO | GO:0004221; ubiquitin thiolesterase activity; Molecular Function<br>GO:0006511; ubiquitin-dependent protein catabolic process; Biological Process                                                                              |
| 852 | PS in DM only | PGSC0003DMG40003<br>5379 | PGSC0003DMT4000<br>85808 | chr01 | yes | NO |                                                                                                                                                                                                                                |
| 853 | PS in DM only | PGSC0003DMG40003<br>5398 | PGSC0003DMT4000<br>85827 | chr06 | NO  | NO | GO:0006621; protein retention in ER lumen; Biological Process GO:0016021; integral to membrane; Cellular Component GO:0046923; ER retention sequence binding; Molecular Function                                               |
| 854 | PS in DM only | PGSC0003DMG40003<br>5449 | PGSC0003DMT4000<br>85878 | chr05 | NO  | NO |                                                                                                                                                                                                                                |
| 855 | PS in DM only | PGSC0003DMG40003<br>5451 | PGSC0003DMT4000<br>85880 | chr07 | NO  | NO |                                                                                                                                                                                                                                |
| 856 | PS in DM only | PGSC0003DMG40003<br>5809 | PGSC0003DMT4000<br>86238 | chr01 | yes | NO |                                                                                                                                                                                                                                |
| 857 | PS in DM only | PGSC0003DMG40003<br>5813 | PGSC0003DMT4000<br>86242 | chr11 | NO  | NO |                                                                                                                                                                                                                                |
| 858 | PS in DM only | PGSC0003DMG40003<br>5869 | PGSC0003DMT4000<br>86298 | chr03 | yes | NO | GO:0005634; nucleus; Cellular Component GO:0008270; zinc ion binding; Molecular Function<br>GO:0016568; chromatin modification; Biological Process GO:0018024; histone-lysine N-methyltransferase activity; Molecular Function |
| 859 | PS in DM only | PGSC0003DMG40003<br>5909 | PGSC0003DMT4000<br>86338 | chr01 | yes | NO |                                                                                                                                                                                                                                |
| 860 | PS in DM only | PGSC0003DMG40003<br>6076 | PGSC0003DMT4000<br>86505 | chr04 | NO  | NO | GO:0005215; transporter activity; Molecular Function GO:0006810; transport; Biological Process<br>GO:0016021; integral to membrane; Cellular Component GO:0055085; transmembrane transport; Biological Process                 |
| 861 | PS in DM only | PGSC0003DMG40003<br>6137 | PGSC0003DMT4000<br>86566 | chr06 | NO  | NO |                                                                                                                                                                                                                                |



|     |               |                          |                          |       |     |     |                                                                                                                                                                                                                                                                  |
|-----|---------------|--------------------------|--------------------------|-------|-----|-----|------------------------------------------------------------------------------------------------------------------------------------------------------------------------------------------------------------------------------------------------------------------|
| 862 | PS in DM only | PGSC0003DMG40003<br>6207 | PGSC0003DMT4000<br>86636 | chr09 | yes | NO  | GO:0016491; oxidoreductase activity;<br>Molecular Function                                                                                                                                                                                                       |
| 863 | PS in DM only | PGSC0003DMG40003<br>6462 | PGSC0003DMT4000<br>86891 | chr10 | yes | NO  |                                                                                                                                                                                                                                                                  |
| 864 | PS in DM only | PGSC0003DMG40003<br>6768 | PGSC0003DMT4000<br>87197 | chr12 | NO  | NO  |                                                                                                                                                                                                                                                                  |
| 865 | PS in DM only | PGSC0003DMG40003<br>6842 | PGSC0003DMT4000<br>87271 | chr03 | yes | NO  | GO:0030528; transcription regulator<br>activity; Molecular Function<br>GO:0045449; regulation of transcription;<br>Biological Process                                                                                                                            |
| 866 | PS in DM only | PGSC0003DMG40003<br>6909 | PGSC0003DMT4000<br>87338 | chr12 | yes | yes | GO:0005515; protein binding; Molecular<br>Function                                                                                                                                                                                                               |
| 867 | PS in DM only | PGSC0003DMG40003<br>6982 | PGSC0003DMT4000<br>87411 | chr04 | yes | NO  | GO:0005737; cytoplasm; Cellular<br>Component                                                                                                                                                                                                                     |
| 868 | PS in DM only | PGSC0003DMG40003<br>7147 | PGSC0003DMT4000<br>87576 | chr05 | yes | NO  |                                                                                                                                                                                                                                                                  |
| 869 | PS in DM only | PGSC0003DMG40003<br>7445 | PGSC0003DMT4000<br>87874 | chr12 | yes | NO  | GO:0003824; catalytic activity; Molecular<br>Function GO:0008152; metabolic process;<br>Biological Process                                                                                                                                                       |
| 870 | PS in DM only | PGSC0003DMG40003<br>7447 | PGSC0003DMT4000<br>87876 | chr01 | NO  | NO  |                                                                                                                                                                                                                                                                  |
| 871 | PS in DM only | PGSC0003DMG40003<br>7498 | PGSC0003DMT4000<br>87927 | chr06 | yes | NO  |                                                                                                                                                                                                                                                                  |
| 872 | PS in DM only | PGSC0003DMG40003<br>7782 | PGSC0003DMT4000<br>88211 | -     | NO  | NO  |                                                                                                                                                                                                                                                                  |
| 873 | PS in DM only | PGSC0003DMG40003<br>7906 | PGSC0003DMT4000<br>88335 | chr06 | NO  | NO  |                                                                                                                                                                                                                                                                  |
| 874 | PS in DM only | PGSC0003DMG40003<br>8026 | PGSC0003DMT4000<br>88455 | chr09 | NO  | NO  | GO:0003700; transcription factor activity;<br>Molecular Function GO:0005634;<br>nucleus; Cellular Component<br>GO:0006355; regulation of transcription,<br>DNA-dependent; Biological Process<br>GO:0043565; sequence-specific DNA<br>binding; Molecular Function |
| 875 | PS in DM only | PGSC0003DMG40003<br>8159 | PGSC0003DMT4000<br>88588 | chr07 | NO  | NO  |                                                                                                                                                                                                                                                                  |

|     |               |                          |                          |       |     |     |                                                                                                                                                                                                                                                      |
|-----|---------------|--------------------------|--------------------------|-------|-----|-----|------------------------------------------------------------------------------------------------------------------------------------------------------------------------------------------------------------------------------------------------------|
| 876 | PS in DM only | PGSC0003DMG40003<br>8223 | PGSC0003DMT4000<br>88652 | -     | yes | NO  |                                                                                                                                                                                                                                                      |
| 877 | PS in DM only | PGSC0003DMG40003<br>8271 | PGSC0003DMT4000<br>88700 | chr12 | NO  | NO  | GO:0003700; transcription factor activity; Molecular Function GO:0006355; regulation of transcription, DNA-dependent; Biological Process GO:0016747; transferase activity, transferring acyl groups other than amino-acyl groups; Molecular Function |
| 878 | PS in DM only | PGSC0003DMG40003<br>8282 | PGSC0003DMT4000<br>88711 | chr12 | yes | yes |                                                                                                                                                                                                                                                      |
| 879 | PS in DM only | PGSC0003DMG40003<br>8429 | PGSC0003DMT4000<br>88858 | chr01 | NO  | NO  |                                                                                                                                                                                                                                                      |
| 880 | PS in DM only | PGSC0003DMG40003<br>8452 | PGSC0003DMT4000<br>88881 | chr12 | NO  | NO  |                                                                                                                                                                                                                                                      |
| 881 | PS in DM only | PGSC0003DMG40003<br>8993 | PGSC0003DMT4000<br>89422 | chr01 | NO  | NO  |                                                                                                                                                                                                                                                      |
| 882 | PS in DM only | PGSC0003DMG40003<br>9002 | PGSC0003DMT4000<br>89431 | chr02 | yes | NO  | GO:0000228; nuclear chromosome; Cellular Component                                                                                                                                                                                                   |
| 883 | PS in DM only | PGSC0003DMG40003<br>9028 | PGSC0003DMT4000<br>89457 | chr10 | NO  | NO  |                                                                                                                                                                                                                                                      |
| 884 | PS in DM only | PGSC0003DMG40003<br>9182 | PGSC0003DMT4000<br>89611 | chr03 | NO  | NO  |                                                                                                                                                                                                                                                      |
| 885 | PS in DM only | PGSC0003DMG40003<br>9327 | PGSC0003DMT4000<br>89756 | chr01 | yes | NO  |                                                                                                                                                                                                                                                      |
| 886 | PS in DM only | PGSC0003DMG40003<br>9637 | PGSC0003DMT4000<br>90066 | chr02 | yes | NO  |                                                                                                                                                                                                                                                      |
| 887 | PS in DM only | PGSC0003DMG40003<br>9701 | PGSC0003DMT4000<br>90130 | chr04 | NO  | NO  |                                                                                                                                                                                                                                                      |
| 888 | PS in DM only | PGSC0003DMG40003<br>9739 | PGSC0003DMT4000<br>90168 | chr10 | yes | NO  |                                                                                                                                                                                                                                                      |
| 889 | PS in DM only | PGSC0003DMG40004<br>0017 | PGSC0003DMT4000<br>90446 | chr09 | NO  | NO  |                                                                                                                                                                                                                                                      |
| 890 | PS in DM only | PGSC0003DMG40004<br>0099 | PGSC0003DMT4000<br>90528 | chr02 | yes | yes |                                                                                                                                                                                                                                                      |
| 891 | PS in DM only | PGSC0003DMG40004<br>0214 | PGSC0003DMT4000<br>90643 | chr05 | yes | NO  |                                                                                                                                                                                                                                                      |
| 892 | PS in DM only | PGSC0003DMG40004<br>0326 | PGSC0003DMT4000<br>90755 | -     | NO  | NO  | GO:0003824; catalytic activity; Molecular Function GO:0008152; metabolic process; Biological Process                                                                                                                                                 |

|     |               |                          |                          |       |     |     |                                                                                                                                                                                    |
|-----|---------------|--------------------------|--------------------------|-------|-----|-----|------------------------------------------------------------------------------------------------------------------------------------------------------------------------------------|
| 893 | PS in DM only | PGSC0003DMG40004<br>0381 | PGSC0003DMT4000<br>90810 | chr11 | NO  | NO  |                                                                                                                                                                                    |
| 894 | PS in DM only | PGSC0003DMG40004<br>0440 | PGSC0003DMT4000<br>90869 | chr10 | NO  | NO  |                                                                                                                                                                                    |
| 895 | PS in DM only | PGSC0003DMG40004<br>0694 | PGSC0003DMT4000<br>91123 | chr04 | yes | yes |                                                                                                                                                                                    |
| 896 | PS in DM only | PGSC0003DMG40004<br>0959 | PGSC0003DMT4000<br>91388 | chr10 | yes | NO  |                                                                                                                                                                                    |
| 897 | PS in DM only | PGSC0003DMG40004<br>1112 | PGSC0003DMT4000<br>91541 | chr07 | yes | NO  |                                                                                                                                                                                    |
| 898 | PS in DM only | PGSC0003DMG40004<br>1212 | PGSC0003DMT4000<br>91641 | chr10 | NO  | NO  |                                                                                                                                                                                    |
| 899 | PS in DM only | PGSC0003DMG40004<br>1399 | PGSC0003DMT4000<br>91828 | chr05 | yes | NO  |                                                                                                                                                                                    |
| 900 | PS in DM only | PGSC0003DMG40004<br>1617 | PGSC0003DMT4000<br>92046 |       |     |     |                                                                                                                                                                                    |
| 901 | PS in DM only | PGSC0003DMG40004<br>1862 | PGSC0003DMT4000<br>92291 | chr08 | NO  | NO  |                                                                                                                                                                                    |
| 902 | PS in DM only | PGSC0003DMG40004<br>1954 | PGSC0003DMT4000<br>92383 | chr11 | NO  | NO  |                                                                                                                                                                                    |
| 903 | PS in DM only | PGSC0003DMG40004<br>2106 | PGSC0003DMT4000<br>92535 | chr10 | NO  | NO  |                                                                                                                                                                                    |
| 904 | PS in DM only | PGSC0003DMG40004<br>2118 | PGSC0003DMT4000<br>92547 | chr10 | NO  | NO  |                                                                                                                                                                                    |
| 905 | PS in DM only | PGSC0003DMG40004<br>2161 | PGSC0003DMT4000<br>92590 | chr10 | yes | NO  |                                                                                                                                                                                    |
| 906 | PS in DM only | PGSC0003DMG40004<br>2259 | PGSC0003DMT4000<br>92688 | chr03 | yes | NO  |                                                                                                                                                                                    |
| 907 | PS in DM only | PGSC0003DMG40004<br>2310 | PGSC0003DMT4000<br>92739 | chr03 | yes | NO  | GO:0004672; protein kinase activity;<br>Molecular Function GO:0005524; ATP<br>binding; Molecular Function<br>GO:0006468; protein amino acid<br>phosphorylation; Biological Process |
| 908 | PS in DM only | PGSC0003DMG40004<br>2672 | PGSC0003DMT4000<br>93101 | chr07 | yes | yes |                                                                                                                                                                                    |
| 909 | PS in DM only | PGSC0003DMG40004<br>2781 | PGSC0003DMT4000<br>93210 | chr12 | yes | NO  | GO:0005515; protein binding; Molecular<br>Function                                                                                                                                 |

|     |               |                  |                 |       |     |     |                                                                                                                                                                                                                           |
|-----|---------------|------------------|-----------------|-------|-----|-----|---------------------------------------------------------------------------------------------------------------------------------------------------------------------------------------------------------------------------|
| 910 | PS in DM only | PGSC0003DMG40004 | PGSC0003DMT4000 | chr04 | yes | NO  |                                                                                                                                                                                                                           |
|     |               | 2926             | 93355           |       |     |     |                                                                                                                                                                                                                           |
| 911 | PS in DM only | PGSC0003DMG40004 | PGSC0003DMT4000 | chr09 | NO  | NO  |                                                                                                                                                                                                                           |
|     |               | 3167             | 93596           |       |     |     |                                                                                                                                                                                                                           |
| 912 | PS in DM only | PGSC0003DMG40004 | PGSC0003DMT4000 | chr06 | NO  | NO  |                                                                                                                                                                                                                           |
|     |               | 3388             | 93817           |       |     |     |                                                                                                                                                                                                                           |
| 913 | PS in DM only | PGSC0003DMG40004 | PGSC0003DMT4000 | chr03 | yes | NO  |                                                                                                                                                                                                                           |
|     |               | 3392             | 93821           |       |     |     |                                                                                                                                                                                                                           |
| 914 | PS in DM only | PGSC0003DMG40004 | PGSC0003DMT4000 | chr02 | yes | yes |                                                                                                                                                                                                                           |
|     |               | 3626             | 94055           |       |     |     |                                                                                                                                                                                                                           |
| 915 | PS in DM only | PGSC0003DMG40004 | PGSC0003DMT4000 | chr11 | NO  | NO  |                                                                                                                                                                                                                           |
|     |               | 3948             | 94377           |       |     |     |                                                                                                                                                                                                                           |
| 916 | PS in DM only | PGSC0003DMG40004 | PGSC0003DMT4000 | -     | NO  | NO  |                                                                                                                                                                                                                           |
|     |               | 4174             | 94603           |       |     |     |                                                                                                                                                                                                                           |
| 917 | PS in DM only | PGSC0003DMG40004 | PGSC0003DMT4000 | chr03 | yes | NO  |                                                                                                                                                                                                                           |
|     |               | 4211             | 94640           |       |     |     |                                                                                                                                                                                                                           |
| 918 | PS in DM only | PGSC0003DMG40004 | PGSC0003DMT4000 | chr06 | NO  | NO  | GO:0003824; catalytic activity; Molecular Function                                                                                                                                                                        |
|     |               | 4216             | 94645           |       |     |     |                                                                                                                                                                                                                           |
| 919 | PS in DM only | PGSC0003DMG40004 | PGSC0003DMT4000 | chr07 | yes | yes |                                                                                                                                                                                                                           |
|     |               | 4616             | 95045           |       |     |     |                                                                                                                                                                                                                           |
| 920 | PS in DM only | PGSC0003DMG40004 | PGSC0003DMT4000 | chr05 | yes | yes | GO:0031072; heat shock protein binding; Molecular Function                                                                                                                                                                |
|     |               | 4699             | 95128           |       |     |     |                                                                                                                                                                                                                           |
| 921 | PS in DM only | PGSC0003DMG40004 | PGSC0003DMT4000 | chr10 | NO  | NO  | GO:0006511; ubiquitin-dependent protein catabolic process; Biological Process<br>GO:0031461; cullin-RING ubiquitin ligase complex; Cellular Component<br>GO:0031625; ubiquitin protein ligase binding; Molecular Function |
|     |               | 4900             | 95329           |       |     |     |                                                                                                                                                                                                                           |
| 922 | PS in DM only | PGSC0003DMG40004 | PGSC0003DMT4000 | -     | yes | NO  |                                                                                                                                                                                                                           |
|     |               | 5171             | 95600           |       |     |     |                                                                                                                                                                                                                           |
| 923 | PS in DM only | PGSC0003DMG40004 | PGSC0003DMT4000 | chr07 | yes | NO  |                                                                                                                                                                                                                           |
|     |               | 5216             | 95645           |       |     |     |                                                                                                                                                                                                                           |
| 924 | PS in DM only | PGSC0003DMG40004 | PGSC0003DMT4000 | chr12 | NO  | NO  |                                                                                                                                                                                                                           |
|     |               | 5259             | 95688           |       |     |     |                                                                                                                                                                                                                           |
| 925 | PS in DM only | PGSC0003DMG40004 | PGSC0003DMT4000 | chr06 | yes | yes |                                                                                                                                                                                                                           |
|     |               | 5261             | 95690           |       |     |     |                                                                                                                                                                                                                           |

|     |               |                          |                          |       |     |    |                                                                                                                                                                                                                |
|-----|---------------|--------------------------|--------------------------|-------|-----|----|----------------------------------------------------------------------------------------------------------------------------------------------------------------------------------------------------------------|
| 926 | PS in DM only | PGSC0003DMG40004<br>5499 | PGSC0003DMT4000<br>95928 | chr03 | NO  | NO |                                                                                                                                                                                                                |
| 927 | PS in DM only | PGSC0003DMG40004<br>5522 | PGSC0003DMT4000<br>95951 | chr06 | NO  | NO | GO:0006621; protein retention in ER lumen; Biological Process GO:0016021; integral to membrane; Cellular Component GO:0046923; ER retention sequence binding; Molecular Function                               |
| 928 | PS in DM only | PGSC0003DMG40004<br>5640 | PGSC0003DMT4000<br>96069 | chr07 | NO  | NO |                                                                                                                                                                                                                |
| 929 | PS in DM only | PGSC0003DMG40004<br>5723 | PGSC0003DMT4000<br>96152 | chr06 | yes | NO |                                                                                                                                                                                                                |
| 930 | PS in DM only | PGSC0003DMG40004<br>5817 | PGSC0003DMT4000<br>96246 | chr01 | NO  | NO | GO:0005543; phospholipid binding; Molecular Function                                                                                                                                                           |
| 931 | PS in DM only | PGSC0003DMG40004<br>5819 | PGSC0003DMT4000<br>96248 | chr11 | NO  | NO |                                                                                                                                                                                                                |
| 932 | PS in DM only | PGSC0003DMG40004<br>6073 | PGSC0003DMT4000<br>96502 | chr06 | yes | NO | GO:0004497; monooxygenase activity; Molecular Function GO:0005506; iron ion binding; Molecular Function GO:0009055; electron carrier activity; Molecular Function GO:0020037; heme binding; Molecular Function |
| 933 | PS in DM only | PGSC0003DMG40004<br>6096 | PGSC0003DMT4000<br>96525 | chr10 | NO  | NO |                                                                                                                                                                                                                |
| 934 | PS in DM only | PGSC0003DMG40004<br>6189 | PGSC0003DMT4000<br>96618 | -     | yes | NO |                                                                                                                                                                                                                |
| 935 | PS in DM only | PGSC0003DMG40004<br>6374 | PGSC0003DMT4000<br>96803 | chr03 | NO  | NO |                                                                                                                                                                                                                |
| 936 | PS in DM only | PGSC0003DMG40004<br>6515 | PGSC0003DMT4000<br>96944 | chr06 | NO  | NO |                                                                                                                                                                                                                |
| 937 | PS in DM only | PGSC0003DMG40004<br>6659 | PGSC0003DMT4000<br>97088 | chr04 | yes | NO | GO:0003824; catalytic activity; Molecular Function GO:0008152; metabolic process; Biological Process                                                                                                           |
| 938 | PS in DM only | PGSC0003DMG40004<br>6996 | PGSC0003DMT4000<br>97425 | chr03 | NO  | NO |                                                                                                                                                                                                                |
| 939 | PS in DM only | PGSC0003DMG40004<br>7035 | PGSC0003DMT4000<br>97464 | chr12 | NO  | NO |                                                                                                                                                                                                                |

|     |                                         |                          |                          |       |     |     |                                                                                                                                                              |
|-----|-----------------------------------------|--------------------------|--------------------------|-------|-----|-----|--------------------------------------------------------------------------------------------------------------------------------------------------------------|
| 940 | PS in DM only                           | PGSC0003DMG40004<br>7299 | PGSC0003DMT4000<br>97728 | chr10 | yes | NO  | GO:0004252; serine-type endopeptidase activity; Molecular Function<br>GO:0006508; proteolysis; Biological Process                                            |
| 941 | Heterozygous PS in RH, not shared by DM | PGSC0003DMG40200<br>0020 | PGSC0003DMT4000<br>00067 | chr01 | yes | NO  |                                                                                                                                                              |
| 942 | Heterozygous PS in RH, not shared by DM | PGSC0003DMG40000<br>0043 | PGSC0003DMT4000<br>00146 | chr08 | NO  | NO  |                                                                                                                                                              |
| 943 | Heterozygous PS in RH, not shared by DM | PGSC0003DMG40100<br>0100 | PGSC0003DMT4000<br>00296 | chr06 | yes | NO  |                                                                                                                                                              |
| 944 | Heterozygous PS in RH, not shared by DM | PGSC0003DMG40000<br>0118 | PGSC0003DMT4000<br>00345 | chr06 | NO  | NO  |                                                                                                                                                              |
| 945 | Heterozygous PS in RH, not shared by DM | PGSC0003DMG40000<br>0136 | PGSC0003DMT4000<br>00383 | chr09 | yes | NO  | GO:0008270; zinc ion binding; Molecular Function GO:0016491; oxidoreductase activity; Molecular Function GO:0055114; oxidation reduction; Biological Process |
| 946 | Heterozygous PS in RH, not shared by DM | PGSC0003DMG40000<br>0149 | PGSC0003DMT4000<br>00436 | chr09 | yes | yes |                                                                                                                                                              |
| 947 | Heterozygous PS in RH, not shared by DM | PGSC0003DMG40000<br>0239 | PGSC0003DMT4000<br>00674 | chr09 | yes | NO  | GO:0016747; transferase activity, transferring acyl groups other than amino-acyl groups; Molecular Function                                                  |
| 948 | Heterozygous PS in RH, not shared by DM | PGSC0003DMG40000<br>0280 | PGSC0003DMT4000<br>00761 | chr06 | yes | NO  |                                                                                                                                                              |
| 949 | Heterozygous PS in RH, not shared by DM | PGSC0003DMG40000<br>0286 | PGSC0003DMT4000<br>00776 | chr01 | NO  | NO  |                                                                                                                                                              |
| 950 | Heterozygous PS in RH, not shared by DM | PGSC0003DMG40000<br>0295 | PGSC0003DMT4000<br>00795 | chr04 | yes | NO  |                                                                                                                                                              |

|     |                                               |                          |                          |       |     |     |                                                         |
|-----|-----------------------------------------------|--------------------------|--------------------------|-------|-----|-----|---------------------------------------------------------|
| 951 | Heterozygous<br>PS in RH, not<br>shared by DM | PGSC0003DMG40000<br>0296 | PGSC0003DMT4000<br>00798 | chr07 | yes | NO  |                                                         |
| 952 | Heterozygous<br>PS in RH, not<br>shared by DM | PGSC0003DMG40100<br>0299 | PGSC0003DMT4000<br>00806 | chr07 | yes | yes |                                                         |
| 953 | Heterozygous<br>PS in RH, not<br>shared by DM | PGSC0003DMG40200<br>0299 | PGSC0003DMT4000<br>00808 | chr12 | yes | yes | GO:0003723; RNA binding; Molecular<br>Function          |
| 954 | Heterozygous<br>PS in RH, not<br>shared by DM | PGSC0003DMG40000<br>0339 | PGSC0003DMT4000<br>00899 | chr03 | yes | NO  | GO:0003676; nucleic acid binding;<br>Molecular Function |
| 955 | Heterozygous<br>PS in RH, not<br>shared by DM | PGSC0003DMG40000<br>0341 | PGSC0003DMT4000<br>00908 | -     | yes | yes | GO:0003676; nucleic acid binding;<br>Molecular Function |
| 956 | Heterozygous<br>PS in RH, not<br>shared by DM | PGSC0003DMG40000<br>0348 | PGSC0003DMT4000<br>00930 | chr12 | NO  | NO  |                                                         |
| 957 | Heterozygous<br>PS in RH, not<br>shared by DM | PGSC0003DMG40000<br>0355 | PGSC0003DMT4000<br>00946 | chr03 | yes | NO  |                                                         |
| 958 | Heterozygous<br>PS in RH, not<br>shared by DM | PGSC0003DMG40000<br>0370 | PGSC0003DMT4000<br>00995 | chr03 | yes | NO  |                                                         |
| 959 | Heterozygous<br>PS in RH, not<br>shared by DM | PGSC0003DMG40000<br>0408 | PGSC0003DMT4000<br>01076 | chr05 | yes | yes |                                                         |
| 960 | Heterozygous<br>PS in RH, not<br>shared by DM | PGSC0003DMG40000<br>0421 | PGSC0003DMT4000<br>01109 | chr07 | NO  | NO  |                                                         |
| 961 | Heterozygous<br>PS in RH, not<br>shared by DM | PGSC0003DMG40000<br>0468 | PGSC0003DMT4000<br>01238 | -     | NO  | NO  |                                                         |
| 962 | Heterozygous<br>PS in RH, not<br>shared by DM | PGSC0003DMG40000<br>0505 | PGSC0003DMT4000<br>01350 | chr12 | yes | NO  |                                                         |

|     |                                               |                          |                          |       |     |     |                                                                                                                                                                                                                                          |
|-----|-----------------------------------------------|--------------------------|--------------------------|-------|-----|-----|------------------------------------------------------------------------------------------------------------------------------------------------------------------------------------------------------------------------------------------|
| 963 | Heterozygous<br>PS in RH, not<br>shared by DM | PGSC0003DMG40000<br>0509 | PGSC0003DMT4000<br>01369 | chr11 | yes | NO  |                                                                                                                                                                                                                                          |
| 964 | Heterozygous<br>PS in RH, not<br>shared by DM | PGSC0003DMG40200<br>0515 | PGSC0003DMT4000<br>01383 | chr06 | yes | NO  | GO:0005529; sugar binding; Molecular<br>Function GO:0006486; protein amino acid<br>glycosylation; Biological Process<br>GO:0008378; galactosyltransferase<br>activity; Molecular Function<br>GO:0016020; membrane; Cellular<br>Component |
| 965 | Heterozygous<br>PS in RH, not<br>shared by DM | PGSC0003DMG40000<br>0516 | PGSC0003DMT4000<br>01389 | chr09 | yes | NO  | GO:0004672; protein kinase activity;<br>Molecular Function GO:0005524; ATP<br>binding; Molecular Function<br>GO:0006468; protein amino acid<br>phosphorylation; Biological Process                                                       |
| 966 | Heterozygous<br>PS in RH, not<br>shared by DM | PGSC0003DMG40000<br>0534 | PGSC0003DMT4000<br>01446 | chr05 | yes | yes |                                                                                                                                                                                                                                          |
| 967 | Heterozygous<br>PS in RH, not<br>shared by DM | PGSC0003DMG40000<br>0565 | PGSC0003DMT4000<br>01522 | chr06 | yes | NO  |                                                                                                                                                                                                                                          |
| 968 | Heterozygous<br>PS in RH, not<br>shared by DM | PGSC0003DMG40100<br>0594 | PGSC0003DMT4000<br>01596 | chr05 | yes | NO  | GO:0005215; transporter activity;<br>Molecular Function GO:0006857;<br>oligopeptide transport; Biological Process<br>GO:0016020; membrane; Cellular<br>Component                                                                         |
| 969 | Heterozygous<br>PS in RH, not<br>shared by DM | PGSC0003DMG40000<br>0632 | PGSC0003DMT4000<br>01691 | chr03 | yes | NO  | GO:0005215; transporter activity;<br>Molecular Function GO:0006857;<br>oligopeptide transport; Biological Process<br>GO:0016020; membrane; Cellular<br>Component                                                                         |
| 970 | Heterozygous<br>PS in RH, not<br>shared by DM | PGSC0003DMG40000<br>0655 | PGSC0003DMT4000<br>01750 | chr01 | yes | yes |                                                                                                                                                                                                                                          |
| 971 | Heterozygous<br>PS in RH, not<br>shared by DM | PGSC0003DMG40000<br>0710 | PGSC0003DMT4000<br>01885 | chr09 | NO  | NO  |                                                                                                                                                                                                                                          |



|     |                                               |                          |                          |       |     |     |                                                                                                                                                                                                                  |
|-----|-----------------------------------------------|--------------------------|--------------------------|-------|-----|-----|------------------------------------------------------------------------------------------------------------------------------------------------------------------------------------------------------------------|
| 972 | Heterozygous<br>PS in RH, not<br>shared by DM | PGSC0003DMG40000<br>0719 | PGSC0003DMT4000<br>01903 | chr10 | NO  | NO  | GO:0006629; lipid metabolic process;<br>Biological Process GO:0016788;<br>hydrolase activity, acting on ester bonds;<br>Molecular Function                                                                       |
| 973 | Heterozygous<br>PS in RH, not<br>shared by DM | PGSC0003DMG40000<br>0724 | PGSC0003DMT4000<br>01912 | chr02 | yes | NO  | GO:0009059; macromolecule biosynthetic<br>process; Biological Process GO:0030176;<br>integral to endoplasmic reticulum<br>membrane; Cellular Component                                                           |
| 974 | Heterozygous<br>PS in RH, not<br>shared by DM | PGSC0003DMG40000<br>0728 | PGSC0003DMT4000<br>01921 | chr01 | NO  | NO  | GO:0003677; DNA binding; Molecular<br>Function GO:0005634; nucleus; Cellular<br>Component GO:0006352; transcription<br>initiation; Biological Process<br>GO:0016570; histone modification;<br>Biological Process |
| 975 | Heterozygous<br>PS in RH, not<br>shared by DM | PGSC0003DMG40000<br>0729 | PGSC0003DMT4000<br>01923 | chr10 | yes | NO  |                                                                                                                                                                                                                  |
| 976 | Heterozygous<br>PS in RH, not<br>shared by DM | PGSC0003DMG40000<br>0784 | PGSC0003DMT4000<br>02055 | chr08 | yes | NO  | GO:0005515; protein binding; Molecular<br>Function GO:0005524; ATP binding;<br>Molecular Function GO:0006915;<br>apoptosis; Biological Process                                                                   |
| 977 | Heterozygous<br>PS in RH, not<br>shared by DM | PGSC0003DMG40000<br>0830 | PGSC0003DMT4000<br>02168 | chr02 | yes | NO  | GO:0008168; methyltransferase activity;<br>Molecular Function                                                                                                                                                    |
| 978 | Heterozygous<br>PS in RH, not<br>shared by DM | PGSC0003DMG40000<br>0836 | PGSC0003DMT4000<br>02184 | chr04 | yes | yes | GO:0004721; phosphoprotein phosphatase<br>activity; Molecular Function                                                                                                                                           |
| 979 | Heterozygous<br>PS in RH, not<br>shared by DM | PGSC0003DMG40000<br>0867 | PGSC0003DMT4000<br>02268 | chr02 | NO  | NO  |                                                                                                                                                                                                                  |
| 980 | Heterozygous<br>PS in RH, not<br>shared by DM | PGSC0003DMG40000<br>0869 | PGSC0003DMT4000<br>02273 | chr06 | yes | yes | GO:0004672; protein kinase activity;<br>Molecular Function GO:0005524; ATP<br>binding; Molecular Function<br>GO:0006468; protein amino acid<br>phosphorylation; Biological Process                               |

|     |                                               |                          |                          |       |     |     |                                                                                                                                                                                                                                                                                                         |
|-----|-----------------------------------------------|--------------------------|--------------------------|-------|-----|-----|---------------------------------------------------------------------------------------------------------------------------------------------------------------------------------------------------------------------------------------------------------------------------------------------------------|
| 981 | Heterozygous<br>PS in RH, not<br>shared by DM | PGSC0003DMG40000<br>0879 | PGSC0003DMT4000<br>02293 | -     | NO  | NO  |                                                                                                                                                                                                                                                                                                         |
| 982 | Heterozygous<br>PS in RH, not<br>shared by DM | PGSC0003DMG40000<br>1016 | PGSC0003DMT4000<br>02647 | chr04 | yes | NO  |                                                                                                                                                                                                                                                                                                         |
| 983 | Heterozygous<br>PS in RH, not<br>shared by DM | PGSC0003DMG40000<br>1052 | PGSC0003DMT4000<br>02726 | chr06 | NO  | NO  |                                                                                                                                                                                                                                                                                                         |
| 984 | Heterozygous<br>PS in RH, not<br>shared by DM | PGSC0003DMG40000<br>1093 | PGSC0003DMT4000<br>02809 | -     | yes | NO  | GO:0004497; monooxygenase activity;<br>Molecular Function GO:0005506; iron ion<br>binding; Molecular Function<br>GO:0009055; electron carrier activity;<br>Molecular Function GO:0020037; heme<br>binding; Molecular Function<br>GO:0005529; sugar binding; Molecular<br>Function                       |
| 985 | Heterozygous<br>PS in RH, not<br>shared by DM | PGSC0003DMG40000<br>1117 | PGSC0003DMT4000<br>02866 | chr07 | yes | yes |                                                                                                                                                                                                                                                                                                         |
| 986 | Heterozygous<br>PS in RH, not<br>shared by DM | PGSC0003DMG40000<br>1143 | PGSC0003DMT4000<br>02920 | chr08 | yes | NO  | GO:0003995; acyl-CoA dehydrogenase<br>activity; Molecular Function<br>GO:0003997; acyl-CoA oxidase activity;<br>Molecular Function GO:0005777;<br>peroxisome; Cellular Component<br>GO:0006635; fatty acid beta-oxidation;<br>Biological Process GO:0055114;<br>oxidation reduction; Biological Process |
| 987 | Heterozygous<br>PS in RH, not<br>shared by DM | PGSC0003DMG40000<br>1191 | PGSC0003DMT4000<br>03013 | chr02 | yes | NO  |                                                                                                                                                                                                                                                                                                         |
| 988 | Heterozygous<br>PS in RH, not<br>shared by DM | PGSC0003DMG40000<br>1211 | PGSC0003DMT4000<br>03054 | chr06 | yes | NO  | GO:0003723; RNA binding; Molecular<br>Function                                                                                                                                                                                                                                                          |
| 989 | Heterozygous<br>PS in RH, not<br>shared by DM | PGSC0003DMG40000<br>1259 | PGSC0003DMT4000<br>03185 | chr06 | yes | NO  |                                                                                                                                                                                                                                                                                                         |
| 990 | Heterozygous<br>PS in RH, not<br>shared by DM | PGSC0003DMG40000<br>1294 | PGSC0003DMT4000<br>03264 | chr02 | yes | NO  |                                                                                                                                                                                                                                                                                                         |

|      |                                               |                          |                          |       |     |    |                                                                                                                                                                                                                                                                                                                                                                                                      |
|------|-----------------------------------------------|--------------------------|--------------------------|-------|-----|----|------------------------------------------------------------------------------------------------------------------------------------------------------------------------------------------------------------------------------------------------------------------------------------------------------------------------------------------------------------------------------------------------------|
| 991  | Heterozygous<br>PS in RH, not<br>shared by DM | PGSC0003DMG40300<br>1309 | PGSC0003DMT4000<br>03302 | chr06 | NO  | NO |                                                                                                                                                                                                                                                                                                                                                                                                      |
| 992  | Heterozygous<br>PS in RH, not<br>shared by DM | PGSC0003DMG40000<br>1386 | PGSC0003DMT4000<br>03515 | chr01 | NO  | NO |                                                                                                                                                                                                                                                                                                                                                                                                      |
| 993  | Heterozygous<br>PS in RH, not<br>shared by DM | PGSC0003DMG40000<br>1413 | PGSC0003DMT4000<br>03573 | chr01 | yes | NO | GO:0004888; transmembrane receptor<br>activity; Molecular Function<br>GO:0005515; protein binding; Molecular<br>Function GO:0005524; ATP binding;<br>Molecular Function GO:0006915;<br>apoptosis; Biological Process<br>GO:0007165; signal transduction;<br>Biological Process GO:0031224; intrinsic<br>to membrane; Cellular Component<br>GO:0045087; innate immune response;<br>Biological Process |
| 994  | Heterozygous<br>PS in RH, not<br>shared by DM | PGSC0003DMG40000<br>1425 | PGSC0003DMT4000<br>03602 | chr12 | yes | NO |                                                                                                                                                                                                                                                                                                                                                                                                      |
| 995  | Heterozygous<br>PS in RH, not<br>shared by DM | PGSC0003DMG40000<br>1432 | PGSC0003DMT4000<br>03632 | chr12 | yes | NO |                                                                                                                                                                                                                                                                                                                                                                                                      |
| 996  | Heterozygous<br>PS in RH, not<br>shared by DM | PGSC0003DMG40000<br>1458 | PGSC0003DMT4000<br>03697 | chr03 | NO  | NO |                                                                                                                                                                                                                                                                                                                                                                                                      |
| 997  | Heterozygous<br>PS in RH, not<br>shared by DM | PGSC0003DMG40000<br>1492 | PGSC0003DMT4000<br>03765 | chr07 | NO  | NO |                                                                                                                                                                                                                                                                                                                                                                                                      |
| 998  | Heterozygous<br>PS in RH, not<br>shared by DM | PGSC0003DMG40000<br>1503 | PGSC0003DMT4000<br>03795 | chr09 | NO  | NO |                                                                                                                                                                                                                                                                                                                                                                                                      |
| 999  | Heterozygous<br>PS in RH, not<br>shared by DM | PGSC0003DMG40000<br>1529 | PGSC0003DMT4000<br>03878 | chr08 | NO  | NO |                                                                                                                                                                                                                                                                                                                                                                                                      |
| 1000 | Heterozygous<br>PS in RH, not<br>shared by DM | PGSC0003DMG40000<br>1546 | PGSC0003DMT4000<br>03919 | chr01 | NO  | NO |                                                                                                                                                                                                                                                                                                                                                                                                      |

|      |                                               |                          |                          |       |     |    |                                                                                                                                                                                                                                                                      |
|------|-----------------------------------------------|--------------------------|--------------------------|-------|-----|----|----------------------------------------------------------------------------------------------------------------------------------------------------------------------------------------------------------------------------------------------------------------------|
| 1001 | Heterozygous<br>PS in RH, not<br>shared by DM | PGSC0003DMG40000<br>1682 | PGSC0003DMT4000<br>04228 | chr04 | yes | NO |                                                                                                                                                                                                                                                                      |
| 1002 | Heterozygous<br>PS in RH, not<br>shared by DM | PGSC0003DMG40000<br>1711 | PGSC0003DMT4000<br>04314 | chr01 | yes | NO | GO:0004252; serine-type endopeptidase<br>activity; Molecular Function<br>GO:0006508; proteolysis; Biological<br>Process GO:0042802; identical protein<br>binding; Molecular Function<br>GO:0043086; negative regulation of<br>catalytic activity; Biological Process |
| 1003 | Heterozygous<br>PS in RH, not<br>shared by DM | PGSC0003DMG40000<br>1730 | PGSC0003DMT4000<br>04359 | chr07 | yes | NO |                                                                                                                                                                                                                                                                      |
| 1004 | Heterozygous<br>PS in RH, not<br>shared by DM | PGSC0003DMG40000<br>1751 | PGSC0003DMT4000<br>04396 | chr07 | yes | NO |                                                                                                                                                                                                                                                                      |
| 1005 | Heterozygous<br>PS in RH, not<br>shared by DM | PGSC0003DMG40000<br>1752 | PGSC0003DMT4000<br>04399 | chr11 | yes | NO | GO:0004252; serine-type endopeptidase<br>activity; Molecular Function<br>GO:0006508; proteolysis; Biological<br>Process                                                                                                                                              |
| 1006 | Heterozygous<br>PS in RH, not<br>shared by DM | PGSC0003DMG40000<br>1781 | PGSC0003DMT4000<br>04466 | chr05 | NO  | NO |                                                                                                                                                                                                                                                                      |
| 1007 | Heterozygous<br>PS in RH, not<br>shared by DM | PGSC0003DMG40000<br>1863 | PGSC0003DMT4000<br>04712 | -     | NO  | NO |                                                                                                                                                                                                                                                                      |
| 1008 | Heterozygous<br>PS in RH, not<br>shared by DM | PGSC0003DMG40000<br>1866 | PGSC0003DMT4000<br>04720 | chr09 | NO  | NO |                                                                                                                                                                                                                                                                      |
| 1009 | Heterozygous<br>PS in RH, not<br>shared by DM | PGSC0003DMG40000<br>1890 | PGSC0003DMT4000<br>04770 | chr05 | yes | NO | GO:0005515; protein binding; Molecular<br>Function GO:0005524; ATP binding;<br>Molecular Function GO:0006915;<br>apoptosis; Biological Process                                                                                                                       |

|      |                                               |                          |                          |       |     |     |                                                                                                                                                                                                                                                                 |
|------|-----------------------------------------------|--------------------------|--------------------------|-------|-----|-----|-----------------------------------------------------------------------------------------------------------------------------------------------------------------------------------------------------------------------------------------------------------------|
| 1010 | Heterozygous<br>PS in RH, not<br>shared by DM | PGSC0003DMG40000<br>1900 | PGSC0003DMT4000<br>04785 | chr03 | yes | NO  | GO:0004497; monooxygenase activity;<br>Molecular Function GO:0005506; iron ion<br>binding; Molecular Function<br>GO:0009055; electron carrier activity;<br>Molecular Function GO:0020037; heme<br>binding; Molecular Function                                   |
| 1011 | Heterozygous<br>PS in RH, not<br>shared by DM | PGSC0003DMG40000<br>1967 | PGSC0003DMT4000<br>04973 | chr01 | NO  | NO  |                                                                                                                                                                                                                                                                 |
| 1012 | Heterozygous<br>PS in RH, not<br>shared by DM | PGSC0003DMG40000<br>1996 | PGSC0003DMT4000<br>05052 | chr10 | yes | NO  |                                                                                                                                                                                                                                                                 |
| 1013 | Heterozygous<br>PS in RH, not<br>shared by DM | PGSC0003DMG40000<br>2019 | PGSC0003DMT4000<br>05106 | chr05 | yes | NO  | GO:0000156; two-component response<br>regulator activity; Molecular Function<br>GO:0000160; two-component signal<br>transduction system (phosphorelay);<br>Biological Process GO:0006355;<br>regulation of transcription, DNA-<br>dependent; Biological Process |
| 1014 | Heterozygous<br>PS in RH, not<br>shared by DM | PGSC0003DMG40200<br>2024 | PGSC0003DMT4000<br>05127 | chr09 | NO  | NO  |                                                                                                                                                                                                                                                                 |
| 1015 | Heterozygous<br>PS in RH, not<br>shared by DM | PGSC0003DMG40000<br>2030 | PGSC0003DMT4000<br>05137 | -     | NO  | NO  |                                                                                                                                                                                                                                                                 |
| 1016 | Heterozygous<br>PS in RH, not<br>shared by DM | PGSC0003DMG40000<br>2054 | PGSC0003DMT4000<br>05207 | chr12 | NO  | NO  |                                                                                                                                                                                                                                                                 |
| 1017 | Heterozygous<br>PS in RH, not<br>shared by DM | PGSC0003DMG40000<br>2067 | PGSC0003DMT4000<br>05246 | chr05 | yes | yes |                                                                                                                                                                                                                                                                 |
| 1018 | Heterozygous<br>PS in RH, not<br>shared by DM | PGSC0003DMG40000<br>2082 | PGSC0003DMT4000<br>05337 | chr09 | NO  | NO  |                                                                                                                                                                                                                                                                 |
| 1019 | Heterozygous<br>PS in RH, not<br>shared by DM | PGSC0003DMG40000<br>2129 | PGSC0003DMT4000<br>05455 | chr09 | yes | NO  |                                                                                                                                                                                                                                                                 |

|      |                                               |                          |                          |       |     |     |                                                                                                                                                                    |
|------|-----------------------------------------------|--------------------------|--------------------------|-------|-----|-----|--------------------------------------------------------------------------------------------------------------------------------------------------------------------|
| 1020 | Heterozygous<br>PS in RH, not<br>shared by DM | PGSC0003DMG40000<br>2136 | PGSC0003DMT4000<br>05473 | chr01 | yes | NO  |                                                                                                                                                                    |
| 1021 | Heterozygous<br>PS in RH, not<br>shared by DM | PGSC0003DMG40000<br>2154 | PGSC0003DMT4000<br>05513 | chr12 | yes | yes |                                                                                                                                                                    |
| 1022 | Heterozygous<br>PS in RH, not<br>shared by DM | PGSC0003DMG40000<br>2228 | PGSC0003DMT4000<br>05682 | chr07 | yes | NO  |                                                                                                                                                                    |
| 1023 | Heterozygous<br>PS in RH, not<br>shared by DM | PGSC0003DMG40000<br>2338 | PGSC0003DMT4000<br>06012 | chr12 | yes | NO  | GO:0000287; magnesium ion binding;<br>Molecular Function GO:0008152;<br>metabolic process; Biological Process<br>GO:0016829; lyase activity; Molecular<br>Function |
| 1024 | Heterozygous<br>PS in RH, not<br>shared by DM | PGSC0003DMG40000<br>2381 | PGSC0003DMT4000<br>06124 | chr06 | yes | yes | GO:0004869; cysteine-type endopeptidase<br>inhibitor activity; Molecular Function                                                                                  |
| 1025 | Heterozygous<br>PS in RH, not<br>shared by DM | PGSC0003DMG40000<br>2382 | PGSC0003DMT4000<br>06125 | chr03 | yes | NO  |                                                                                                                                                                    |
| 1026 | Heterozygous<br>PS in RH, not<br>shared by DM | PGSC0003DMG40000<br>2387 | PGSC0003DMT4000<br>06135 | chr08 | NO  | NO  |                                                                                                                                                                    |
| 1027 | Heterozygous<br>PS in RH, not<br>shared by DM | PGSC0003DMG40000<br>2415 | PGSC0003DMT4000<br>06209 | -     | NO  | NO  |                                                                                                                                                                    |
| 1028 | Heterozygous<br>PS in RH, not<br>shared by DM | PGSC0003DMG40000<br>2423 | PGSC0003DMT4000<br>06222 | chr03 | NO  | NO  |                                                                                                                                                                    |
| 1029 | Heterozygous<br>PS in RH, not<br>shared by DM | PGSC0003DMG40000<br>2470 | PGSC0003DMT4000<br>06323 | chr01 | yes | NO  |                                                                                                                                                                    |
| 1030 | Heterozygous<br>PS in RH, not<br>shared by DM | PGSC0003DMG40000<br>2491 | PGSC0003DMT4000<br>06372 | chr05 | yes | NO  |                                                                                                                                                                    |
| 1031 | Heterozygous<br>PS in RH, not<br>shared by DM | PGSC0003DMG40000<br>2544 | PGSC0003DMT4000<br>06523 | chr06 | yes | NO  |                                                                                                                                                                    |

|      |                                         |                          |                          |       |     |     |                                                                                                                                                                     |
|------|-----------------------------------------|--------------------------|--------------------------|-------|-----|-----|---------------------------------------------------------------------------------------------------------------------------------------------------------------------|
| 1032 | Heterozygous PS in RH, not shared by DM | PGSC0003DMG40000<br>2547 | PGSC0003DMT4000<br>06532 | chr01 | yes | NO  | GO:0005622; intracellular; Cellular Component                                                                                                                       |
| 1033 | Heterozygous PS in RH, not shared by DM | PGSC0003DMG40000<br>2580 | PGSC0003DMT4000<br>06632 | chr08 | yes | yes |                                                                                                                                                                     |
| 1034 | Heterozygous PS in RH, not shared by DM | PGSC0003DMG40000<br>2581 | PGSC0003DMT4000<br>06633 | chr05 | yes | yes |                                                                                                                                                                     |
| 1035 | Heterozygous PS in RH, not shared by DM | PGSC0003DMG40000<br>2590 | PGSC0003DMT4000<br>06654 | chr09 | yes | NO  | GO:0016021; integral to membrane; Cellular Component GO:0016758; transferase activity, transferring hexosyl groups; Molecular Function                              |
| 1036 | Heterozygous PS in RH, not shared by DM | PGSC0003DMG40000<br>2608 | PGSC0003DMT4000<br>06709 | chr05 | yes | NO  | GO:0016209; antioxidant activity; Molecular Function GO:0016491; oxidoreductase activity; Molecular Function GO:0045454; cell redox homeostasis; Biological Process |
| 1037 | Heterozygous PS in RH, not shared by DM | PGSC0003DMG40000<br>2646 | PGSC0003DMT4000<br>06823 | chr08 | yes | NO  | GO:0005515; protein binding; Molecular Function GO:0005524; ATP binding; Molecular Function GO:0006915; apoptosis; Biological Process                               |
| 1038 | Heterozygous PS in RH, not shared by DM | PGSC0003DMG40000<br>2678 | PGSC0003DMT4000<br>06901 | chr08 | yes | NO  |                                                                                                                                                                     |
| 1039 | Heterozygous PS in RH, not shared by DM | PGSC0003DMG40100<br>2721 | PGSC0003DMT4000<br>07046 | chr10 | NO  | NO  |                                                                                                                                                                     |
| 1040 | Heterozygous PS in RH, not shared by DM | PGSC0003DMG40000<br>2750 | PGSC0003DMT4000<br>07105 | chr06 | yes | NO  |                                                                                                                                                                     |
| 1041 | Heterozygous PS in RH, not shared by DM | PGSC0003DMG40000<br>2818 | PGSC0003DMT4000<br>07319 | chr09 | NO  | NO  |                                                                                                                                                                     |
| 1042 | Heterozygous PS in RH, not shared by DM | PGSC0003DMG40000<br>2833 | PGSC0003DMT4000<br>07370 | chr12 | yes | NO  |                                                                                                                                                                     |

|      |                                               |                          |                          |       |     |     |                                                                                                                                                                                                                                                                            |
|------|-----------------------------------------------|--------------------------|--------------------------|-------|-----|-----|----------------------------------------------------------------------------------------------------------------------------------------------------------------------------------------------------------------------------------------------------------------------------|
| 1043 | Heterozygous<br>PS in RH, not<br>shared by DM | PGSC0003DMG40000<br>2920 | PGSC0003DMT4000<br>07570 | chr03 | yes | NO  | GO:0005515; protein binding; Molecular<br>Function GO:0005524; ATP binding;<br>Molecular Function GO:0006915;<br>apoptosis; Biological Process                                                                                                                             |
| 1044 | Heterozygous<br>PS in RH, not<br>shared by DM | PGSC0003DMG40000<br>3072 | PGSC0003DMT4000<br>07944 | chr04 | NO  | NO  |                                                                                                                                                                                                                                                                            |
| 1045 | Heterozygous<br>PS in RH, not<br>shared by DM | PGSC0003DMG40000<br>3090 | PGSC0003DMT4000<br>07990 | chr05 | yes | yes |                                                                                                                                                                                                                                                                            |
| 1046 | Heterozygous<br>PS in RH, not<br>shared by DM | PGSC0003DMG40000<br>3109 | PGSC0003DMT4000<br>08044 | chr09 | yes | NO  |                                                                                                                                                                                                                                                                            |
| 1047 | Heterozygous<br>PS in RH, not<br>shared by DM | PGSC0003DMG40000<br>3117 | PGSC0003DMT4000<br>08083 | chr08 | yes | yes | GO:0003700; transcription factor activity;<br>Molecular Function GO:0006355;<br>regulation of transcription, DNA-<br>dependent; Biological Process<br>GO:0008270; zinc ion binding; Molecular<br>Function GO:0043565; sequence-specific<br>DNA binding; Molecular Function |
| 1048 | Heterozygous<br>PS in RH, not<br>shared by DM | PGSC0003DMG40000<br>3236 | PGSC0003DMT4000<br>08383 | chr09 | yes | NO  |                                                                                                                                                                                                                                                                            |
| 1049 | Heterozygous<br>PS in RH, not<br>shared by DM | PGSC0003DMG40000<br>3257 | PGSC0003DMT4000<br>08432 | chr11 | yes | NO  | GO:0008152; metabolic process;<br>Biological Process                                                                                                                                                                                                                       |
| 1050 | Heterozygous<br>PS in RH, not<br>shared by DM | PGSC0003DMG40000<br>3269 | PGSC0003DMT4000<br>08457 | chr01 | NO  | NO  |                                                                                                                                                                                                                                                                            |



|      |                                               |                          |                          |       |     |     |                                                                                                                                                                                                                                                                                                                                                                                                                 |
|------|-----------------------------------------------|--------------------------|--------------------------|-------|-----|-----|-----------------------------------------------------------------------------------------------------------------------------------------------------------------------------------------------------------------------------------------------------------------------------------------------------------------------------------------------------------------------------------------------------------------|
| 1051 | Heterozygous<br>PS in RH, not<br>shared by DM | PGSC0003DMG40000<br>3340 | PGSC0003DMT4000<br>08622 | chr02 | yes | yes | GO:0003824; catalytic activity; Molecular<br>Function GO:0005524; ATP binding;<br>Molecular Function GO:0006754; ATP<br>biosynthetic process; Biological Process<br>GO:0008152; metabolic process;<br>Biological Process GO:0016020;<br>membrane; Cellular Component<br>GO:0016820; hydrolase activity, acting on<br>acid anhydrides, catalyzing<br>transmembrane movement of substances;<br>Molecular Function |
| 1052 | Heterozygous<br>PS in RH, not<br>shared by DM | PGSC0003DMG40000<br>3377 | PGSC0003DMT4000<br>08704 | chr09 | NO  | NO  |                                                                                                                                                                                                                                                                                                                                                                                                                 |
| 1053 | Heterozygous<br>PS in RH, not<br>shared by DM | PGSC0003DMG40000<br>3380 | PGSC0003DMT4000<br>08721 | chr05 | NO  | NO  |                                                                                                                                                                                                                                                                                                                                                                                                                 |
| 1054 | Heterozygous<br>PS in RH, not<br>shared by DM | PGSC0003DMG40000<br>3446 | PGSC0003DMT4000<br>08875 | -     | yes | NO  | GO:0004497; monooxygenase activity;<br>Molecular Function GO:0005506; iron ion<br>binding; Molecular Function<br>GO:0009055; electron carrier activity;<br>Molecular Function GO:0020037; heme<br>binding; Molecular Function                                                                                                                                                                                   |
| 1055 | Heterozygous<br>PS in RH, not<br>shared by DM | PGSC0003DMG40000<br>3485 | PGSC0003DMT4000<br>08946 | chr07 | NO  | NO  |                                                                                                                                                                                                                                                                                                                                                                                                                 |
| 1056 | Heterozygous<br>PS in RH, not<br>shared by DM | PGSC0003DMG40100<br>3570 | PGSC0003DMT4000<br>09199 | chr12 | yes | yes |                                                                                                                                                                                                                                                                                                                                                                                                                 |
| 1057 | Heterozygous<br>PS in RH, not<br>shared by DM | PGSC0003DMG40000<br>3588 | PGSC0003DMT4000<br>09242 | chr01 | NO  | NO  |                                                                                                                                                                                                                                                                                                                                                                                                                 |
| 1058 | Heterozygous<br>PS in RH, not<br>shared by DM | PGSC0003DMG40000<br>3596 | PGSC0003DMT4000<br>09269 | chr07 | yes | NO  |                                                                                                                                                                                                                                                                                                                                                                                                                 |
| 1059 | Heterozygous<br>PS in RH, not<br>shared by DM | PGSC0003DMG40000<br>3621 | PGSC0003DMT4000<br>09319 | chr10 | NO  | NO  |                                                                                                                                                                                                                                                                                                                                                                                                                 |

|      |                                               |                          |                          |       |     |     |                                                                                                                                                                                                     |
|------|-----------------------------------------------|--------------------------|--------------------------|-------|-----|-----|-----------------------------------------------------------------------------------------------------------------------------------------------------------------------------------------------------|
| 1060 | Heterozygous<br>PS in RH, not<br>shared by DM | PGSC0003DMG40000<br>3623 | PGSC0003DMT4000<br>09324 | chr05 | yes | NO  |                                                                                                                                                                                                     |
| 1061 | Heterozygous<br>PS in RH, not<br>shared by DM | PGSC0003DMG40100<br>3636 | PGSC0003DMT4000<br>09351 | chr07 | yes | yes |                                                                                                                                                                                                     |
| 1062 | Heterozygous<br>PS in RH, not<br>shared by DM | PGSC0003DMG40200<br>3636 | PGSC0003DMT4000<br>09355 | chr10 | yes | NO  |                                                                                                                                                                                                     |
| 1063 | Heterozygous<br>PS in RH, not<br>shared by DM | PGSC0003DMG40000<br>3724 | PGSC0003DMT4000<br>09548 | -     | NO  | NO  |                                                                                                                                                                                                     |
| 1064 | Heterozygous<br>PS in RH, not<br>shared by DM | PGSC0003DMG40000<br>3739 | PGSC0003DMT4000<br>09587 | chr01 | yes | NO  |                                                                                                                                                                                                     |
| 1065 | Heterozygous<br>PS in RH, not<br>shared by DM | PGSC0003DMG40000<br>3760 | PGSC0003DMT4000<br>09634 | chr03 | yes | NO  | GO:0004571; mannosyl-oligosaccharide<br>1,2-alpha-mannosidase activity; Molecular<br>Function GO:0005509; calcium ion<br>binding; Molecular Function<br>GO:0016020; membrane; Cellular<br>Component |
| 1066 | Heterozygous<br>PS in RH, not<br>shared by DM | PGSC0003DMG40000<br>3781 | PGSC0003DMT4000<br>09686 | chr04 | NO  | NO  |                                                                                                                                                                                                     |
| 1067 | Heterozygous<br>PS in RH, not<br>shared by DM | PGSC0003DMG40000<br>3810 | PGSC0003DMT4000<br>09741 | chr12 | NO  | NO  |                                                                                                                                                                                                     |
| 1068 | Heterozygous<br>PS in RH, not<br>shared by DM | PGSC0003DMG40000<br>3817 | PGSC0003DMT4000<br>09752 | chr05 | NO  | NO  |                                                                                                                                                                                                     |
| 1069 | Heterozygous<br>PS in RH, not<br>shared by DM | PGSC0003DMG40000<br>3829 | PGSC0003DMT4000<br>09781 | chr04 | yes | yes | GO:0005524; ATP binding; Molecular<br>Function GO:0006915; apoptosis;<br>Biological Process                                                                                                         |
| 1070 | Heterozygous<br>PS in RH, not<br>shared by DM | PGSC0003DMG40000<br>3853 | PGSC0003DMT4000<br>09835 | -     | NO  | NO  |                                                                                                                                                                                                     |

|      |                                               |                          |                          |       |     |     |                                                                                                                                                                                                                               |
|------|-----------------------------------------------|--------------------------|--------------------------|-------|-----|-----|-------------------------------------------------------------------------------------------------------------------------------------------------------------------------------------------------------------------------------|
| 1071 | Heterozygous<br>PS in RH, not<br>shared by DM | PGSC0003DMG40000<br>3885 | PGSC0003DMT4000<br>09913 | chr02 | yes | NO  |                                                                                                                                                                                                                               |
| 1072 | Heterozygous<br>PS in RH, not<br>shared by DM | PGSC0003DMG40000<br>3906 | PGSC0003DMT4000<br>09982 | chr07 | NO  | NO  |                                                                                                                                                                                                                               |
| 1073 | Heterozygous<br>PS in RH, not<br>shared by DM | PGSC0003DMG40000<br>3912 | PGSC0003DMT4000<br>09990 | -     | NO  | NO  |                                                                                                                                                                                                                               |
| 1074 | Heterozygous<br>PS in RH, not<br>shared by DM | PGSC0003DMG40000<br>3919 | PGSC0003DMT4000<br>10002 | chr11 | yes | yes |                                                                                                                                                                                                                               |
| 1075 | Heterozygous<br>PS in RH, not<br>shared by DM | PGSC0003DMG40000<br>3932 | PGSC0003DMT4000<br>10033 | chr05 | yes | yes | GO:0004871; signal transducer activity;<br>Molecular Function GO:0009416;<br>response to light stimulus; Biological<br>Process                                                                                                |
| 1076 | Heterozygous<br>PS in RH, not<br>shared by DM | PGSC0003DMG40000<br>3942 | PGSC0003DMT4000<br>10069 | -     | yes | yes |                                                                                                                                                                                                                               |
| 1077 | Heterozygous<br>PS in RH, not<br>shared by DM | PGSC0003DMG40000<br>3950 | PGSC0003DMT4000<br>10087 | chr06 | NO  | NO  |                                                                                                                                                                                                                               |
| 1078 | Heterozygous<br>PS in RH, not<br>shared by DM | PGSC0003DMG40100<br>3979 | PGSC0003DMT4000<br>10155 | chr04 | yes | NO  | GO:0004497; monooxygenase activity;<br>Molecular Function GO:0005506; iron ion<br>binding; Molecular Function<br>GO:0009055; electron carrier activity;<br>Molecular Function GO:0020037; heme<br>binding; Molecular Function |
| 1079 | Heterozygous<br>PS in RH, not<br>shared by DM | PGSC0003DMG40000<br>4014 | PGSC0003DMT4000<br>10265 | chr11 | NO  | NO  |                                                                                                                                                                                                                               |
| 1080 | Heterozygous<br>PS in RH, not<br>shared by DM | PGSC0003DMG40000<br>4039 | PGSC0003DMT4000<br>10344 | chr02 | yes | NO  |                                                                                                                                                                                                                               |
| 1081 | Heterozygous<br>PS in RH, not<br>shared by DM | PGSC0003DMG40000<br>4046 | PGSC0003DMT4000<br>10363 | chr05 | NO  | NO  |                                                                                                                                                                                                                               |

|      |                                               |                          |                          |       |     |    |                                                                                                                                                                                                                                                                                                                                                                     |
|------|-----------------------------------------------|--------------------------|--------------------------|-------|-----|----|---------------------------------------------------------------------------------------------------------------------------------------------------------------------------------------------------------------------------------------------------------------------------------------------------------------------------------------------------------------------|
| 1082 | Heterozygous<br>PS in RH, not<br>shared by DM | PGSC0003DMG40200<br>4125 | PGSC0003DMT4000<br>10556 | chr03 | yes | NO |                                                                                                                                                                                                                                                                                                                                                                     |
| 1083 | Heterozygous<br>PS in RH, not<br>shared by DM | PGSC0003DMG40000<br>4182 | PGSC0003DMT4000<br>10721 | chr08 | yes | NO | GO:0004672; protein kinase activity;<br>Molecular Function GO:0005515; protein<br>binding; Molecular Function<br>GO:0005524; ATP binding; Molecular<br>Function GO:0006468; protein amino acid<br>phosphorylation; Biological Process                                                                                                                               |
| 1084 | Heterozygous<br>PS in RH, not<br>shared by DM | PGSC0003DMG40000<br>4204 | PGSC0003DMT4000<br>10758 | chr04 | NO  | NO |                                                                                                                                                                                                                                                                                                                                                                     |
| 1085 | Heterozygous<br>PS in RH, not<br>shared by DM | PGSC0003DMG40000<br>4205 | PGSC0003DMT4000<br>10761 | chr08 | NO  | NO | GO:0000184; nuclear-transcribed mRNA<br>catabolic process, nonsense-mediated<br>decay; Biological Process GO:0003677;<br>DNA binding; Molecular Function<br>GO:0004386; helicase activity; Molecular<br>Function GO:0005524; ATP binding;<br>Molecular Function GO:0005737;<br>cytoplasm; Cellular Component<br>GO:0008270; zinc ion binding; Molecular<br>Function |
| 1086 | Heterozygous<br>PS in RH, not<br>shared by DM | PGSC0003DMG40000<br>4211 | PGSC0003DMT4000<br>10772 | chr09 | yes | NO |                                                                                                                                                                                                                                                                                                                                                                     |
| 1087 | Heterozygous<br>PS in RH, not<br>shared by DM | PGSC0003DMG40000<br>4235 | PGSC0003DMT4000<br>10827 | chr10 | NO  | NO |                                                                                                                                                                                                                                                                                                                                                                     |
| 1088 | Heterozygous<br>PS in RH, not<br>shared by DM | PGSC0003DMG40100<br>4281 | PGSC0003DMT4000<br>10931 | chr07 | NO  | NO |                                                                                                                                                                                                                                                                                                                                                                     |
| 1089 | Heterozygous<br>PS in RH, not<br>shared by DM | PGSC0003DMG40000<br>4296 | PGSC0003DMT4000<br>10970 | chr01 | NO  | NO |                                                                                                                                                                                                                                                                                                                                                                     |
| 1090 | Heterozygous<br>PS in RH, not<br>shared by DM | PGSC0003DMG40000<br>4309 | PGSC0003DMT4000<br>11000 | chr02 | NO  | NO |                                                                                                                                                                                                                                                                                                                                                                     |

|      |                                               |                          |                          |       |     |    |                                                                                                                                                                                                                                                                                                                                                                                                            |
|------|-----------------------------------------------|--------------------------|--------------------------|-------|-----|----|------------------------------------------------------------------------------------------------------------------------------------------------------------------------------------------------------------------------------------------------------------------------------------------------------------------------------------------------------------------------------------------------------------|
| 1091 | Heterozygous<br>PS in RH, not<br>shared by DM | PGSC0003DMG40000<br>4361 | PGSC0003DMT4000<br>11145 | chr09 | yes | NO |                                                                                                                                                                                                                                                                                                                                                                                                            |
| 1092 | Heterozygous<br>PS in RH, not<br>shared by DM | PGSC0003DMG40200<br>4406 | PGSC0003DMT4000<br>11248 | chr01 | NO  | NO |                                                                                                                                                                                                                                                                                                                                                                                                            |
| 1093 | Heterozygous<br>PS in RH, not<br>shared by DM | PGSC0003DMG40000<br>4408 | PGSC0003DMT4000<br>11255 | chr10 | NO  | NO |                                                                                                                                                                                                                                                                                                                                                                                                            |
| 1094 | Heterozygous<br>PS in RH, not<br>shared by DM | PGSC0003DMG40000<br>4446 | PGSC0003DMT4000<br>11353 | chr11 | NO  | NO | GO:0003700; transcription factor activity;<br>Molecular Function GO:0005634;<br>nucleus; Cellular Component<br>GO:0006355; regulation of transcription,<br>DNA-dependent; Biological Process<br>GO:0043565; sequence-specific DNA<br>binding; Molecular Function                                                                                                                                           |
| 1095 | Heterozygous<br>PS in RH, not<br>shared by DM | PGSC0003DMG40000<br>4448 | PGSC0003DMT4000<br>11357 | chr03 | yes | NO |                                                                                                                                                                                                                                                                                                                                                                                                            |
| 1096 | Heterozygous<br>PS in RH, not<br>shared by DM | PGSC0003DMG40000<br>4492 | PGSC0003DMT4000<br>11446 | chr07 | yes | NO | GO:0004672; protein kinase activity;<br>Molecular Function GO:0005524; ATP<br>binding; Molecular Function<br>GO:0006468; protein amino acid<br>phosphorylation; Biological Process<br>GO:0003735; structural constituent of<br>ribosome; Molecular Function<br>GO:0005622; intracellular; Cellular<br>Component GO:0005840; ribosome;<br>Cellular Component GO:0006412;<br>translation; Biological Process |
| 1097 | Heterozygous<br>PS in RH, not<br>shared by DM | PGSC0003DMG40000<br>4494 | PGSC0003DMT4000<br>11451 | chr12 | yes | NO |                                                                                                                                                                                                                                                                                                                                                                                                            |
| 1098 | Heterozygous<br>PS in RH, not<br>shared by DM | PGSC0003DMG40000<br>4511 | PGSC0003DMT4000<br>11487 | chr09 | NO  | NO |                                                                                                                                                                                                                                                                                                                                                                                                            |
| 1099 | Heterozygous<br>PS in RH, not<br>shared by DM | PGSC0003DMG40000<br>4534 | PGSC0003DMT4000<br>11524 | chr06 | NO  | NO |                                                                                                                                                                                                                                                                                                                                                                                                            |

|      |                                               |                          |                          |       |     |     |                                                                                                                                                                                      |
|------|-----------------------------------------------|--------------------------|--------------------------|-------|-----|-----|--------------------------------------------------------------------------------------------------------------------------------------------------------------------------------------|
| 1100 | Heterozygous<br>PS in RH, not<br>shared by DM | PGSC0003DMG40000<br>4548 | PGSC0003DMT4000<br>11563 | chr01 | yes | NO  | GO:0006629; lipid metabolic process;<br>Biological Process GO:0016788;<br>hydrolase activity, acting on ester bonds;<br>Molecular Function                                           |
| 1101 | Heterozygous<br>PS in RH, not<br>shared by DM | PGSC0003DMG40200<br>4603 | PGSC0003DMT4000<br>11733 | chr01 | yes | NO  |                                                                                                                                                                                      |
| 1102 | Heterozygous<br>PS in RH, not<br>shared by DM | PGSC0003DMG40000<br>4641 | PGSC0003DMT4000<br>11815 | -     | yes | NO  | GO:0005515; protein binding; Molecular<br>Function GO:0005524; ATP binding;<br>Molecular Function GO:0006915;<br>apoptosis; Biological Process                                       |
| 1103 | Heterozygous<br>PS in RH, not<br>shared by DM | PGSC0003DMG40000<br>4723 | PGSC0003DMT4000<br>12041 | chr05 | yes | yes |                                                                                                                                                                                      |
| 1104 | Heterozygous<br>PS in RH, not<br>shared by DM | PGSC0003DMG40000<br>4725 | PGSC0003DMT4000<br>12045 | chr10 | NO  | NO  |                                                                                                                                                                                      |
| 1105 | Heterozygous<br>PS in RH, not<br>shared by DM | PGSC0003DMG40000<br>4737 | PGSC0003DMT4000<br>12075 | chr04 | NO  | NO  |                                                                                                                                                                                      |
| 1106 | Heterozygous<br>PS in RH, not<br>shared by DM | PGSC0003DMG40200<br>4755 | PGSC0003DMT4000<br>12120 | chr03 | yes | NO  |                                                                                                                                                                                      |
| 1107 | Heterozygous<br>PS in RH, not<br>shared by DM | PGSC0003DMG40000<br>4776 | PGSC0003DMT4000<br>12185 | chr05 | yes | NO  | GO:0004594; pantothenate kinase<br>activity; Molecular Function<br>GO:0005524; ATP binding; Molecular<br>Function GO:0015937; coenzyme A<br>biosynthetic process; Biological Process |
| 1108 | Heterozygous<br>PS in RH, not<br>shared by DM | PGSC0003DMG40000<br>4792 | PGSC0003DMT4000<br>12219 | chr04 | yes | NO  |                                                                                                                                                                                      |
| 1109 | Heterozygous<br>PS in RH, not<br>shared by DM | PGSC0003DMG40000<br>4811 | PGSC0003DMT4000<br>12260 | chr03 | NO  | NO  | GO:0006820; anion transport; Biological<br>Process GO:0015380; anion exchanger<br>activity; Molecular Function<br>GO:0016021; integral to membrane;<br>Cellular Component            |

|      |                                               |                          |                          |       |     |    |                                                                                                                                                                                                                               |
|------|-----------------------------------------------|--------------------------|--------------------------|-------|-----|----|-------------------------------------------------------------------------------------------------------------------------------------------------------------------------------------------------------------------------------|
| 1110 | Heterozygous<br>PS in RH, not<br>shared by DM | PGSC0003DMG40100<br>4813 | PGSC0003DMT4000<br>12263 | chr07 | NO  | NO |                                                                                                                                                                                                                               |
| 1111 | Heterozygous<br>PS in RH, not<br>shared by DM | PGSC0003DMG40000<br>4842 | PGSC0003DMT4000<br>12359 | chr01 | yes | NO |                                                                                                                                                                                                                               |
| 1112 | Heterozygous<br>PS in RH, not<br>shared by DM | PGSC0003DMG40000<br>4843 | PGSC0003DMT4000<br>12361 | chr02 | yes | NO | GO:0004497; monooxygenase activity;<br>Molecular Function GO:0005506; iron ion<br>binding; Molecular Function<br>GO:0009055; electron carrier activity;<br>Molecular Function GO:0020037; heme<br>binding; Molecular Function |
| 1113 | Heterozygous<br>PS in RH, not<br>shared by DM | PGSC0003DMG40100<br>4850 | PGSC0003DMT4000<br>12375 | chr11 | yes | NO |                                                                                                                                                                                                                               |
| 1114 | Heterozygous<br>PS in RH, not<br>shared by DM | PGSC0003DMG40200<br>4858 | PGSC0003DMT4000<br>12405 | chr08 | yes | NO |                                                                                                                                                                                                                               |
| 1115 | Heterozygous<br>PS in RH, not<br>shared by DM | PGSC0003DMG40000<br>4859 | PGSC0003DMT4000<br>12409 | chr07 | NO  | NO |                                                                                                                                                                                                                               |
| 1116 | Heterozygous<br>PS in RH, not<br>shared by DM | PGSC0003DMG40100<br>4870 | PGSC0003DMT4000<br>12446 | chr04 | NO  | NO |                                                                                                                                                                                                                               |
| 1117 | Heterozygous<br>PS in RH, not<br>shared by DM | PGSC0003DMG40000<br>4873 | PGSC0003DMT4000<br>12479 | chr12 | yes | NO | GO:0005524; ATP binding; Molecular<br>Function GO:0006915; apoptosis;<br>Biological Process                                                                                                                                   |
| 1118 | Heterozygous<br>PS in RH, not<br>shared by DM | PGSC0003DMG40000<br>4879 | PGSC0003DMT4000<br>12496 | chr01 | NO  | NO |                                                                                                                                                                                                                               |

|      |                                               |                          |                          |       |     |     |                                                                                                                                                                                                                                                                                                             |
|------|-----------------------------------------------|--------------------------|--------------------------|-------|-----|-----|-------------------------------------------------------------------------------------------------------------------------------------------------------------------------------------------------------------------------------------------------------------------------------------------------------------|
| 1119 | Heterozygous<br>PS in RH, not<br>shared by DM | PGSC0003DMG40000<br>4962 | PGSC0003DMT4000<br>12732 | chr10 | NO  | NO  | GO:0004497; monooxygenase activity;<br>Molecular Function GO:0004499; flavin-<br>containing monooxygenase activity;<br>Molecular Function GO:0050660; FAD<br>binding; Molecular Function<br>GO:0050661; NADP or NADPH binding;<br>Molecular Function GO:0055114;<br>oxidation reduction; Biological Process |
| 1120 | Heterozygous<br>PS in RH, not<br>shared by DM | PGSC0003DMG40000<br>4984 | PGSC0003DMT4000<br>12791 | chr12 | NO  | NO  |                                                                                                                                                                                                                                                                                                             |
| 1121 | Heterozygous<br>PS in RH, not<br>shared by DM | PGSC0003DMG40000<br>5020 | PGSC0003DMT4000<br>12897 | chr01 | yes | NO  |                                                                                                                                                                                                                                                                                                             |
| 1122 | Heterozygous<br>PS in RH, not<br>shared by DM | PGSC0003DMG40000<br>5021 | PGSC0003DMT4000<br>12898 | chr01 | yes | yes | GO:0005524; ATP binding; Molecular<br>Function GO:0016020; membrane;<br>Cellular Component GO:0016887; ATPase<br>activity; Molecular Function<br>GO:0004190; aspartic-type endopeptidase<br>activity; Molecular Function<br>GO:0006508; proteolysis; Biological<br>Process                                  |
| 1123 | Heterozygous<br>PS in RH, not<br>shared by DM | PGSC0003DMG40000<br>5033 | PGSC0003DMT4000<br>12912 | chr01 | NO  | NO  |                                                                                                                                                                                                                                                                                                             |
| 1124 | Heterozygous<br>PS in RH, not<br>shared by DM | PGSC0003DMG40000<br>5037 | PGSC0003DMT4000<br>12926 | chr05 | NO  | NO  |                                                                                                                                                                                                                                                                                                             |
| 1125 | Heterozygous<br>PS in RH, not<br>shared by DM | PGSC0003DMG40000<br>5090 | PGSC0003DMT4000<br>13050 | chr02 | yes | NO  |                                                                                                                                                                                                                                                                                                             |
| 1126 | Heterozygous<br>PS in RH, not<br>shared by DM | PGSC0003DMG40000<br>5094 | PGSC0003DMT4000<br>13059 | chr11 | yes | yes |                                                                                                                                                                                                                                                                                                             |
| 1127 | Heterozygous<br>PS in RH, not<br>shared by DM | PGSC0003DMG40000<br>5105 | PGSC0003DMT4000<br>13082 | chr11 | yes | NO  |                                                                                                                                                                                                                                                                                                             |
| 1128 | Heterozygous<br>PS in RH, not<br>shared by DM | PGSC0003DMG40000<br>5108 | PGSC0003DMT4000<br>13090 | chr08 | NO  | NO  |                                                                                                                                                                                                                                                                                                             |



|      |                                               |                          |                          |       |     |     |                                                                                                                                                                                                                               |
|------|-----------------------------------------------|--------------------------|--------------------------|-------|-----|-----|-------------------------------------------------------------------------------------------------------------------------------------------------------------------------------------------------------------------------------|
| 1129 | Heterozygous<br>PS in RH, not<br>shared by DM | PGSC0003DMG40000<br>5121 | PGSC0003DMT4000<br>13107 | chr01 | yes | NO  |                                                                                                                                                                                                                               |
| 1130 | Heterozygous<br>PS in RH, not<br>shared by DM | PGSC0003DMG40200<br>5139 | PGSC0003DMT4000<br>13159 | chr02 | NO  | NO  | GO:0005215; transporter activity;<br>Molecular Function GO:0006810;<br>transport; Biological Process<br>GO:0016021; integral to membrane;<br>Cellular Component GO:0055085;<br>transmembrane transport; Biological<br>Process |
| 1131 | Heterozygous<br>PS in RH, not<br>shared by DM | PGSC0003DMG40000<br>5174 | PGSC0003DMT4000<br>13242 | chr10 | NO  | NO  |                                                                                                                                                                                                                               |
| 1132 | Heterozygous<br>PS in RH, not<br>shared by DM | PGSC0003DMG40000<br>5177 | PGSC0003DMT4000<br>13249 | -     | NO  | NO  |                                                                                                                                                                                                                               |
| 1133 | Heterozygous<br>PS in RH, not<br>shared by DM | PGSC0003DMG40000<br>5178 | PGSC0003DMT4000<br>13254 | chr08 | NO  | NO  |                                                                                                                                                                                                                               |
| 1134 | Heterozygous<br>PS in RH, not<br>shared by DM | PGSC0003DMG40200<br>5180 | PGSC0003DMT4000<br>13266 | chr08 | yes | NO  |                                                                                                                                                                                                                               |
| 1135 | Heterozygous<br>PS in RH, not<br>shared by DM | PGSC0003DMG40000<br>5186 | PGSC0003DMT4000<br>13292 | chr04 | yes | NO  | GO:0003700; transcription factor activity;<br>Molecular Function GO:0043565;<br>sequence-specific DNA binding;<br>Molecular Function GO:0045449;<br>regulation of transcription; Biological<br>Process                        |
| 1136 | Heterozygous<br>PS in RH, not<br>shared by DM | PGSC0003DMG40000<br>5200 | PGSC0003DMT4000<br>13327 | chr02 | yes | NO  | GO:0016491; oxidoreductase activity;<br>Molecular Function GO:0055114;<br>oxidation reduction; Biological Process                                                                                                             |
| 1137 | Heterozygous<br>PS in RH, not<br>shared by DM | PGSC0003DMG40000<br>5213 | PGSC0003DMT4000<br>13370 | chr01 | yes | yes | GO:0030528; transcription regulator<br>activity; Molecular Function<br>GO:0045449; regulation of transcription;<br>Biological Process                                                                                         |
| 1138 | Heterozygous<br>PS in RH, not<br>shared by DM | PGSC0003DMG40000<br>5267 | PGSC0003DMT4000<br>13497 | chr11 | NO  | NO  |                                                                                                                                                                                                                               |

|      |                                               |                          |                          |       |     |     |                                                                                                                                                                                                                                                    |
|------|-----------------------------------------------|--------------------------|--------------------------|-------|-----|-----|----------------------------------------------------------------------------------------------------------------------------------------------------------------------------------------------------------------------------------------------------|
| 1139 | Heterozygous<br>PS in RH, not<br>shared by DM | PGSC0003DMG40000<br>5298 | PGSC0003DMT4000<br>13565 | chr01 | yes | NO  |                                                                                                                                                                                                                                                    |
| 1140 | Heterozygous<br>PS in RH, not<br>shared by DM | PGSC0003DMG40000<br>5335 | PGSC0003DMT4000<br>13650 | chr06 | yes | NO  | GO:0004888; transmembrane receptor<br>activity; Molecular Function<br>GO:0007165; signal transduction;<br>Biological Process GO:0031224; intrinsic<br>to membrane; Cellular Component<br>GO:0045087; innate immune response;<br>Biological Process |
| 1141 | Heterozygous<br>PS in RH, not<br>shared by DM | PGSC0003DMG40000<br>5359 | PGSC0003DMT4000<br>13704 | chr09 | NO  | NO  |                                                                                                                                                                                                                                                    |
| 1142 | Heterozygous<br>PS in RH, not<br>shared by DM | PGSC0003DMG40000<br>5369 | PGSC0003DMT4000<br>13725 | chr01 | NO  | NO  |                                                                                                                                                                                                                                                    |
| 1143 | Heterozygous<br>PS in RH, not<br>shared by DM | PGSC0003DMG40000<br>5385 | PGSC0003DMT4000<br>13757 | chr02 | NO  | NO  |                                                                                                                                                                                                                                                    |
| 1144 | Heterozygous<br>PS in RH, not<br>shared by DM | PGSC0003DMG40000<br>5410 | PGSC0003DMT4000<br>13831 | chr03 | NO  | NO  |                                                                                                                                                                                                                                                    |
| 1145 | Heterozygous<br>PS in RH, not<br>shared by DM | PGSC0003DMG40000<br>5441 | PGSC0003DMT4000<br>13902 | chr06 | yes | yes |                                                                                                                                                                                                                                                    |
| 1146 | Heterozygous<br>PS in RH, not<br>shared by DM | PGSC0003DMG40200<br>5482 | PGSC0003DMT4000<br>13987 | chr09 | NO  | NO  |                                                                                                                                                                                                                                                    |
| 1147 | Heterozygous<br>PS in RH, not<br>shared by DM | PGSC0003DMG40000<br>5498 | PGSC0003DMT4000<br>14020 | chr07 | yes | NO  | GO:0004672; protein kinase activity;<br>Molecular Function GO:0005524; ATP<br>binding; Molecular Function<br>GO:0006468; protein amino acid<br>phosphorylation; Biological Process                                                                 |

|      |                                               |                          |                          |       |     |     |                                                                                                                                                                                                                                                                                         |
|------|-----------------------------------------------|--------------------------|--------------------------|-------|-----|-----|-----------------------------------------------------------------------------------------------------------------------------------------------------------------------------------------------------------------------------------------------------------------------------------------|
| 1148 | Heterozygous<br>PS in RH, not<br>shared by DM | PGSC0003DMG40000<br>5529 | PGSC0003DMT4000<br>14098 | chr08 | yes | NO  | GO:0006855; multidrug transport;<br>Biological Process GO:0015238; drug<br>transporter activity; Molecular Function<br>GO:0015297; antiporter activity;<br>Molecular Function GO:0016020;<br>membrane; Cellular Component<br>GO:0055085; transmembrane transport;<br>Biological Process |
| 1149 | Heterozygous<br>PS in RH, not<br>shared by DM | PGSC0003DMG40000<br>5597 | PGSC0003DMT4000<br>14271 | chr12 | NO  | NO  |                                                                                                                                                                                                                                                                                         |
| 1150 | Heterozygous<br>PS in RH, not<br>shared by DM | PGSC0003DMG40000<br>5610 | PGSC0003DMT4000<br>14301 | chr04 | NO  | NO  |                                                                                                                                                                                                                                                                                         |
| 1151 | Heterozygous<br>PS in RH, not<br>shared by DM | PGSC0003DMG40000<br>5660 | PGSC0003DMT4000<br>14425 | chr03 | NO  | NO  |                                                                                                                                                                                                                                                                                         |
| 1152 | Heterozygous<br>PS in RH, not<br>shared by DM | PGSC0003DMG40000<br>5673 | PGSC0003DMT4000<br>14472 | -     | NO  | NO  | GO:0003676; nucleic acid binding;<br>Molecular Function                                                                                                                                                                                                                                 |
| 1153 | Heterozygous<br>PS in RH, not<br>shared by DM | PGSC0003DMG40000<br>5676 | PGSC0003DMT4000<br>14488 | chr05 | NO  | NO  | GO:0008152; metabolic process;<br>Biological Process GO:0016787;<br>hydrolase activity; Molecular Function                                                                                                                                                                              |
| 1154 | Heterozygous<br>PS in RH, not<br>shared by DM | PGSC0003DMG40000<br>5695 | PGSC0003DMT4000<br>14548 | chr06 | yes | NO  |                                                                                                                                                                                                                                                                                         |
| 1155 | Heterozygous<br>PS in RH, not<br>shared by DM | PGSC0003DMG40000<br>5758 | PGSC0003DMT4000<br>14772 | chr10 | yes | NO  | GO:0004497; monooxygenase activity;<br>Molecular Function GO:0005506; iron ion<br>binding; Molecular Function<br>GO:0009055; electron carrier activity;<br>Molecular Function GO:0020037; heme<br>binding; Molecular Function                                                           |
| 1156 | Heterozygous<br>PS in RH, not<br>shared by DM | PGSC0003DMG40000<br>5799 | PGSC0003DMT4000<br>14846 | chr04 | yes | yes |                                                                                                                                                                                                                                                                                         |
| 1157 | Heterozygous<br>PS in RH, not<br>shared by DM | PGSC0003DMG40000<br>5820 | PGSC0003DMT4000<br>14918 | chr04 | NO  | NO  |                                                                                                                                                                                                                                                                                         |

|      |                                               |                          |                          |       |     |    |                                                                                                                                                                                                                                       |
|------|-----------------------------------------------|--------------------------|--------------------------|-------|-----|----|---------------------------------------------------------------------------------------------------------------------------------------------------------------------------------------------------------------------------------------|
| 1158 | Heterozygous<br>PS in RH, not<br>shared by DM | PGSC0003DMG40400<br>5966 | PGSC0003DMT4000<br>15295 | chr12 | yes | NO | GO:0008152; metabolic process;<br>Biological Process GO:0016491;<br>oxidoreductase activity; Molecular<br>Function                                                                                                                    |
| 1159 | Heterozygous<br>PS in RH, not<br>shared by DM | PGSC0003DMG40000<br>5967 | PGSC0003DMT4000<br>15301 | chr09 | NO  | NO | GO:0016787; hydrolase activity;<br>Molecular Function                                                                                                                                                                                 |
| 1160 | Heterozygous<br>PS in RH, not<br>shared by DM | PGSC0003DMG40000<br>6058 | PGSC0003DMT4000<br>15517 | chr11 | NO  | NO |                                                                                                                                                                                                                                       |
| 1161 | Heterozygous<br>PS in RH, not<br>shared by DM | PGSC0003DMG40000<br>6077 | PGSC0003DMT4000<br>15568 | chr09 | yes | NO | GO:0005515; protein binding; Molecular<br>Function                                                                                                                                                                                    |
| 1162 | Heterozygous<br>PS in RH, not<br>shared by DM | PGSC0003DMG40000<br>6113 | PGSC0003DMT4000<br>15664 | -     | NO  | NO |                                                                                                                                                                                                                                       |
| 1163 | Heterozygous<br>PS in RH, not<br>shared by DM | PGSC0003DMG40000<br>6119 | PGSC0003DMT4000<br>15670 | chr09 | yes | NO |                                                                                                                                                                                                                                       |
| 1164 | Heterozygous<br>PS in RH, not<br>shared by DM | PGSC0003DMG40000<br>6210 | PGSC0003DMT4000<br>15887 | chr11 | yes | NO | GO:0008152; metabolic process;<br>Biological Process GO:0016758;<br>transferase activity, transferring hexosyl<br>groups; Molecular Function                                                                                          |
| 1165 | Heterozygous<br>PS in RH, not<br>shared by DM | PGSC0003DMG40000<br>6239 | PGSC0003DMT4000<br>15945 | chr08 | yes | NO |                                                                                                                                                                                                                                       |
| 1166 | Heterozygous<br>PS in RH, not<br>shared by DM | PGSC0003DMG40000<br>6247 | PGSC0003DMT4000<br>15969 | chr06 | yes | NO |                                                                                                                                                                                                                                       |
| 1167 | Heterozygous<br>PS in RH, not<br>shared by DM | PGSC0003DMG40000<br>6248 | PGSC0003DMT4000<br>15974 | chr05 | NO  | NO |                                                                                                                                                                                                                                       |
| 1168 | Heterozygous<br>PS in RH, not<br>shared by DM | PGSC0003DMG40100<br>6258 | PGSC0003DMT4000<br>15998 | chr11 | yes | NO | GO:0004672; protein kinase activity;<br>Molecular Function GO:0005515; protein<br>binding; Molecular Function<br>GO:0005524; ATP binding; Molecular<br>Function GO:0006468; protein amino acid<br>phosphorylation; Biological Process |

|      |                                               |                          |                          |       |     |    |                                                                                                                                                                                   |
|------|-----------------------------------------------|--------------------------|--------------------------|-------|-----|----|-----------------------------------------------------------------------------------------------------------------------------------------------------------------------------------|
| 1169 | Heterozygous<br>PS in RH, not<br>shared by DM | PGSC0003DMG40000<br>6268 | PGSC0003DMT4000<br>16034 | chr12 | NO  | NO |                                                                                                                                                                                   |
| 1170 | Heterozygous<br>PS in RH, not<br>shared by DM | PGSC0003DMG40000<br>6269 | PGSC0003DMT4000<br>16035 | chr01 | NO  | NO |                                                                                                                                                                                   |
| 1171 | Heterozygous<br>PS in RH, not<br>shared by DM | PGSC0003DMG40000<br>6278 | PGSC0003DMT4000<br>16058 | chr12 | yes | NO | GO:0055085; transmembrane transport;<br>Biological Process                                                                                                                        |
| 1172 | Heterozygous<br>PS in RH, not<br>shared by DM | PGSC0003DMG40100<br>6284 | PGSC0003DMT4000<br>16072 | chr12 | NO  | NO |                                                                                                                                                                                   |
| 1173 | Heterozygous<br>PS in RH, not<br>shared by DM | PGSC0003DMG40000<br>6292 | PGSC0003DMT4000<br>16096 | chr09 | yes | NO | GO:0016757; transferase activity,<br>transferring glycosyl groups; Molecular<br>Function                                                                                          |
| 1174 | Heterozygous<br>PS in RH, not<br>shared by DM | PGSC0003DMG40000<br>6294 | PGSC0003DMT4000<br>16102 | chr05 | yes | NO |                                                                                                                                                                                   |
| 1175 | Heterozygous<br>PS in RH, not<br>shared by DM | PGSC0003DMG40000<br>6296 | PGSC0003DMT4000<br>16105 | chr12 | yes | NO |                                                                                                                                                                                   |
| 1176 | Heterozygous<br>PS in RH, not<br>shared by DM | PGSC0003DMG40000<br>6297 | PGSC0003DMT4000<br>16107 | chr05 | NO  | NO |                                                                                                                                                                                   |
| 1177 | Heterozygous<br>PS in RH, not<br>shared by DM | PGSC0003DMG40000<br>6304 | PGSC0003DMT4000<br>16127 | chr08 | NO  | NO |                                                                                                                                                                                   |
| 1178 | Heterozygous<br>PS in RH, not<br>shared by DM | PGSC0003DMG40000<br>6344 | PGSC0003DMT4000<br>16233 | chr10 | yes | NO | GO:0016021; integral to membrane;<br>Cellular Component                                                                                                                           |
| 1179 | Heterozygous<br>PS in RH, not<br>shared by DM | PGSC0003DMG40000<br>6399 | PGSC0003DMT4000<br>16369 | chr02 | yes | NO | GO:0004871; signal transducer activity;<br>Molecular Function GO:0005515; protein<br>binding; Molecular Function<br>GO:0009416; response to light stimulus;<br>Biological Process |
| 1180 | Heterozygous<br>PS in RH, not<br>shared by DM | PGSC0003DMG40000<br>6416 | PGSC0003DMT4000<br>16423 | chr09 | NO  | NO |                                                                                                                                                                                   |

|      |                                               |                          |                          |       |     |     |                                                                                                                                              |
|------|-----------------------------------------------|--------------------------|--------------------------|-------|-----|-----|----------------------------------------------------------------------------------------------------------------------------------------------|
| 1181 | Heterozygous<br>PS in RH, not<br>shared by DM | PGSC0003DMG40000<br>6488 | PGSC0003DMT4000<br>16599 | chr12 | NO  | NO  |                                                                                                                                              |
| 1182 | Heterozygous<br>PS in RH, not<br>shared by DM | PGSC0003DMG40000<br>6527 | PGSC0003DMT4000<br>16697 | chr01 | NO  | NO  |                                                                                                                                              |
| 1183 | Heterozygous<br>PS in RH, not<br>shared by DM | PGSC0003DMG40000<br>6528 | PGSC0003DMT4000<br>16703 | chr10 | yes | NO  |                                                                                                                                              |
| 1184 | Heterozygous<br>PS in RH, not<br>shared by DM | PGSC0003DMG40000<br>6594 | PGSC0003DMT4000<br>16849 | chr05 | yes | yes |                                                                                                                                              |
| 1185 | Heterozygous<br>PS in RH, not<br>shared by DM | PGSC0003DMG40000<br>6605 | PGSC0003DMT4000<br>16886 | chr10 | yes | NO  |                                                                                                                                              |
| 1186 | Heterozygous<br>PS in RH, not<br>shared by DM | PGSC0003DMG40000<br>6635 | PGSC0003DMT4000<br>16981 | chr12 | NO  | NO  |                                                                                                                                              |
| 1187 | Heterozygous<br>PS in RH, not<br>shared by DM | PGSC0003DMG40000<br>6644 | PGSC0003DMT4000<br>17006 | chr06 | NO  | NO  |                                                                                                                                              |
| 1188 | Heterozygous<br>PS in RH, not<br>shared by DM | PGSC0003DMG40000<br>6661 | PGSC0003DMT4000<br>17057 | chr05 | yes | yes |                                                                                                                                              |
| 1189 | Heterozygous<br>PS in RH, not<br>shared by DM | PGSC0003DMG40000<br>6672 | PGSC0003DMT4000<br>17087 | chr06 | yes | yes |                                                                                                                                              |
| 1190 | Heterozygous<br>PS in RH, not<br>shared by DM | PGSC0003DMG40000<br>6698 | PGSC0003DMT4000<br>17163 | chr01 | yes | NO  | GO:0008152; metabolic process;<br>Biological Process GO:0016758;<br>transferase activity, transferring hexosyl<br>groups; Molecular Function |
| 1191 | Heterozygous<br>PS in RH, not<br>shared by DM | PGSC0003DMG40000<br>6705 | PGSC0003DMT4000<br>17187 | chr12 | NO  | NO  |                                                                                                                                              |
| 1192 | Heterozygous<br>PS in RH, not<br>shared by DM | PGSC0003DMG40000<br>6733 | PGSC0003DMT4000<br>17277 | chr04 | NO  | NO  |                                                                                                                                              |

|      |                                               |                          |                          |       |     |     |                                                                                                                                                                                                                               |
|------|-----------------------------------------------|--------------------------|--------------------------|-------|-----|-----|-------------------------------------------------------------------------------------------------------------------------------------------------------------------------------------------------------------------------------|
| 1193 | Heterozygous<br>PS in RH, not<br>shared by DM | PGSC0003DMG40000<br>6759 | PGSC0003DMT4000<br>17379 | chr12 | yes | yes |                                                                                                                                                                                                                               |
| 1194 | Heterozygous<br>PS in RH, not<br>shared by DM | PGSC0003DMG40000<br>6762 | PGSC0003DMT4000<br>17386 | chr12 | yes | NO  | GO:0016747; transferase activity,<br>transferring acyl groups other than amino-<br>acyl groups; Molecular Function                                                                                                            |
| 1195 | Heterozygous<br>PS in RH, not<br>shared by DM | PGSC0003DMG40000<br>6765 | PGSC0003DMT4000<br>17392 | chr07 | yes | NO  | GO:0004497; monooxygenase activity;<br>Molecular Function GO:0005506; iron ion<br>binding; Molecular Function<br>GO:0009055; electron carrier activity;<br>Molecular Function GO:0020037; heme<br>binding; Molecular Function |
| 1196 | Heterozygous<br>PS in RH, not<br>shared by DM | PGSC0003DMG40000<br>6769 | PGSC0003DMT4000<br>17408 | chr06 | yes | NO  | GO:0009055; electron carrier activity;<br>Molecular Function GO:0015035; protein<br>disulfide oxidoreductase activity;<br>Molecular Function GO:0045454; cell<br>redox homeostasis; Biological Process                        |
| 1197 | Heterozygous<br>PS in RH, not<br>shared by DM | PGSC0003DMG40000<br>6784 | PGSC0003DMT4000<br>17459 | -     | NO  | NO  |                                                                                                                                                                                                                               |
| 1198 | Heterozygous<br>PS in RH, not<br>shared by DM | PGSC0003DMG40000<br>6785 | PGSC0003DMT4000<br>17461 | chr11 | NO  | NO  | GO:0016747; transferase activity,<br>transferring acyl groups other than amino-<br>acyl groups; Molecular Function                                                                                                            |
| 1199 | Heterozygous<br>PS in RH, not<br>shared by DM | PGSC0003DMG40000<br>6815 | PGSC0003DMT4000<br>17572 | chr01 | NO  | NO  | GO:0003824; catalytic activity; Molecular<br>Function GO:0008152; metabolic process;<br>Biological Process                                                                                                                    |
| 1200 | Heterozygous<br>PS in RH, not<br>shared by DM | PGSC0003DMG40100<br>6826 | PGSC0003DMT4000<br>17592 | chr04 | yes | NO  |                                                                                                                                                                                                                               |
| 1201 | Heterozygous<br>PS in RH, not<br>shared by DM | PGSC0003DMG40000<br>6835 | PGSC0003DMT4000<br>17624 | -     | NO  | NO  |                                                                                                                                                                                                                               |
| 1202 | Heterozygous<br>PS in RH, not<br>shared by DM | PGSC0003DMG40000<br>6851 | PGSC0003DMT4000<br>17657 | chr01 | yes | NO  | GO:0003677; DNA binding; Molecular<br>Function GO:0005634; nucleus; Cellular<br>Component GO:0006352; transcription<br>initiation; Biological Process<br>GO:0016570; histone modification;<br>Biological Process              |

|      |                                         |                          |                          |       |     |     |                                                                                                                                                                                                                        |
|------|-----------------------------------------|--------------------------|--------------------------|-------|-----|-----|------------------------------------------------------------------------------------------------------------------------------------------------------------------------------------------------------------------------|
| 1203 | Heterozygous PS in RH, not shared by DM | PGSC0003DMG40000<br>6877 | PGSC0003DMT4000<br>17726 | -     | yes | yes | GO:0008483; transaminase activity; Molecular Function GO:0030170; pyridoxal phosphate binding; Molecular Function                                                                                                      |
| 1204 | Heterozygous PS in RH, not shared by DM | PGSC0003DMG40000<br>7005 | PGSC0003DMT4000<br>18033 | chr03 | yes | NO  | GO:0016491; oxidoreductase activity; Molecular Function GO:0055114; oxidation reduction; Biological Process                                                                                                            |
| 1205 | Heterozygous PS in RH, not shared by DM | PGSC0003DMG40000<br>7073 | PGSC0003DMT4000<br>18218 | chr05 | yes | NO  |                                                                                                                                                                                                                        |
| 1206 | Heterozygous PS in RH, not shared by DM | PGSC0003DMG40000<br>7076 | PGSC0003DMT4000<br>18230 | chr10 | yes | NO  | GO:0004672; protein kinase activity; Molecular Function GO:0005524; ATP binding; Molecular Function GO:0006468; protein amino acid phosphorylation; Biological Process                                                 |
| 1207 | Heterozygous PS in RH, not shared by DM | PGSC0003DMG40000<br>7109 | PGSC0003DMT4000<br>18304 | chr07 | yes | yes |                                                                                                                                                                                                                        |
| 1208 | Heterozygous PS in RH, not shared by DM | PGSC0003DMG40000<br>7112 | PGSC0003DMT4000<br>18308 | chr12 | NO  | NO  |                                                                                                                                                                                                                        |
| 1209 | Heterozygous PS in RH, not shared by DM | PGSC0003DMG40000<br>7115 | PGSC0003DMT4000<br>18321 | chr09 | yes | NO  | GO:0004672; protein kinase activity; Molecular Function GO:0005515; protein binding; Molecular Function GO:0005524; ATP binding; Molecular Function GO:0006468; protein amino acid phosphorylation; Biological Process |
| 1210 | Heterozygous PS in RH, not shared by DM | PGSC0003DMG40000<br>7150 | PGSC0003DMT4000<br>18425 | chr04 | yes | NO  |                                                                                                                                                                                                                        |
| 1211 | Heterozygous PS in RH, not shared by DM | PGSC0003DMG40000<br>7157 | PGSC0003DMT4000<br>18447 | chr03 | NO  | NO  |                                                                                                                                                                                                                        |
| 1212 | Heterozygous PS in RH, not shared by DM | PGSC0003DMG40000<br>7218 | PGSC0003DMT4000<br>18602 | -     | NO  | NO  |                                                                                                                                                                                                                        |



|      |                                               |                          |                          |       |     |     |                                                                                                                                                                                                                                                                                                                                                                                |
|------|-----------------------------------------------|--------------------------|--------------------------|-------|-----|-----|--------------------------------------------------------------------------------------------------------------------------------------------------------------------------------------------------------------------------------------------------------------------------------------------------------------------------------------------------------------------------------|
| 1213 | Heterozygous<br>PS in RH, not<br>shared by DM | PGSC0003DMG40000<br>7239 | PGSC0003DMT4000<br>18688 | chr11 | NO  | NO  |                                                                                                                                                                                                                                                                                                                                                                                |
| 1214 | Heterozygous<br>PS in RH, not<br>shared by DM | PGSC0003DMG40000<br>7250 | PGSC0003DMT4000<br>18717 | -     | yes | NO  |                                                                                                                                                                                                                                                                                                                                                                                |
| 1215 | Heterozygous<br>PS in RH, not<br>shared by DM | PGSC0003DMG40000<br>7251 | PGSC0003DMT4000<br>18718 | chr12 | NO  | NO  | GO:0005249; voltage-gated potassium channel activity; Molecular Function GO:0006813; potassium ion transport; Biological Process GO:0008076; voltage-gated potassium channel complex; Cellular Component GO:0016020; membrane; Cellular Component GO:0006904; vesicle docking during exocytosis; Biological Process GO:0016192; vesicle-mediated transport; Biological Process |
| 1216 | Heterozygous<br>PS in RH, not<br>shared by DM | PGSC0003DMG40000<br>7270 | PGSC0003DMT4000<br>18758 | chr10 | yes | yes |                                                                                                                                                                                                                                                                                                                                                                                |
| 1217 | Heterozygous<br>PS in RH, not<br>shared by DM | PGSC0003DMG40000<br>7271 | PGSC0003DMT4000<br>18760 | chr04 | yes | NO  |                                                                                                                                                                                                                                                                                                                                                                                |
| 1218 | Heterozygous<br>PS in RH, not<br>shared by DM | PGSC0003DMG40000<br>7310 | PGSC0003DMT4000<br>18854 | chr08 | yes | NO  |                                                                                                                                                                                                                                                                                                                                                                                |
| 1219 | Heterozygous<br>PS in RH, not<br>shared by DM | PGSC0003DMG40000<br>7351 | PGSC0003DMT4000<br>18961 | chr12 | yes | NO  |                                                                                                                                                                                                                                                                                                                                                                                |
| 1220 | Heterozygous<br>PS in RH, not<br>shared by DM | PGSC0003DMG40000<br>7412 | PGSC0003DMT4000<br>19156 | chr04 | NO  | NO  |                                                                                                                                                                                                                                                                                                                                                                                |
| 1221 | Heterozygous<br>PS in RH, not<br>shared by DM | PGSC0003DMG40000<br>7445 | PGSC0003DMT4000<br>19250 | chr02 | yes | NO  | GO:0004672; protein kinase activity; Molecular Function GO:0005515; protein binding; Molecular Function GO:0005524; ATP binding; Molecular Function GO:0006468; protein amino acid phosphorylation; Biological Process                                                                                                                                                         |
| 1222 | Heterozygous<br>PS in RH, not<br>shared by DM | PGSC0003DMG40000<br>7504 | PGSC0003DMT4000<br>19412 | chr07 | NO  | NO  |                                                                                                                                                                                                                                                                                                                                                                                |

|      |                                               |                          |                          |       |     |     |                                                                                                                                                                                                                               |
|------|-----------------------------------------------|--------------------------|--------------------------|-------|-----|-----|-------------------------------------------------------------------------------------------------------------------------------------------------------------------------------------------------------------------------------|
| 1223 | Heterozygous<br>PS in RH, not<br>shared by DM | PGSC0003DMG40000<br>7523 | PGSC0003DMT4000<br>19465 | chr02 | NO  | NO  |                                                                                                                                                                                                                               |
| 1224 | Heterozygous<br>PS in RH, not<br>shared by DM | PGSC0003DMG40000<br>7526 | PGSC0003DMT4000<br>19468 | chr06 | yes | NO  |                                                                                                                                                                                                                               |
| 1225 | Heterozygous<br>PS in RH, not<br>shared by DM | PGSC0003DMG40000<br>7566 | PGSC0003DMT4000<br>19562 | chr12 | yes | NO  | GO:0005507; copper ion binding;<br>Molecular Function GO:0016491;<br>oxidoreductase activity; Molecular<br>Function GO:0055114; oxidation<br>reduction; Biological Process                                                    |
| 1226 | Heterozygous<br>PS in RH, not<br>shared by DM | PGSC0003DMG40000<br>7590 | PGSC0003DMT4000<br>19639 | chr09 | yes | NO  | GO:0005576; extracellular region;<br>Cellular Component GO:0008083; growth<br>factor activity; Molecular Function<br>GO:0008283; cell proliferation; Biological<br>Process                                                    |
| 1227 | Heterozygous<br>PS in RH, not<br>shared by DM | PGSC0003DMG40200<br>7604 | PGSC0003DMT4000<br>19672 | chr12 | NO  | NO  |                                                                                                                                                                                                                               |
| 1228 | Heterozygous<br>PS in RH, not<br>shared by DM | PGSC0003DMG40000<br>7622 | PGSC0003DMT4000<br>19727 | chr01 | yes | yes |                                                                                                                                                                                                                               |
| 1229 | Heterozygous<br>PS in RH, not<br>shared by DM | PGSC0003DMG40000<br>7639 | PGSC0003DMT4000<br>19769 | chr03 | NO  | NO  |                                                                                                                                                                                                                               |
| 1230 | Heterozygous<br>PS in RH, not<br>shared by DM | PGSC0003DMG40200<br>7748 | PGSC0003DMT4000<br>20029 | chr04 | yes | NO  | GO:0004497; monooxygenase activity;<br>Molecular Function GO:0005506; iron ion<br>binding; Molecular Function<br>GO:0009055; electron carrier activity;<br>Molecular Function GO:0020037; heme<br>binding; Molecular Function |
| 1231 | Heterozygous<br>PS in RH, not<br>shared by DM | PGSC0003DMG40000<br>7769 | PGSC0003DMT4000<br>20068 | chr06 | yes | NO  |                                                                                                                                                                                                                               |

|      |                                               |                          |                          |       |     |     |                                                                                                                                                                                                                       |
|------|-----------------------------------------------|--------------------------|--------------------------|-------|-----|-----|-----------------------------------------------------------------------------------------------------------------------------------------------------------------------------------------------------------------------|
| 1232 | Heterozygous<br>PS in RH, not<br>shared by DM | PGSC0003DMG40000<br>7770 | PGSC0003DMT4000<br>20072 | chr03 | yes | NO  | GO:0004616; phosphogluconate<br>dehydrogenase (decarboxylating) activity;<br>Molecular Function GO:0006098; pentose-<br>phosphate shunt; Biological Process<br>GO:0055114; oxidation reduction;<br>Biological Process |
| 1233 | Heterozygous<br>PS in RH, not<br>shared by DM | PGSC0003DMG40000<br>7848 | PGSC0003DMT4000<br>20297 | chr12 | NO  | NO  |                                                                                                                                                                                                                       |
| 1234 | Heterozygous<br>PS in RH, not<br>shared by DM | PGSC0003DMG40000<br>7908 | PGSC0003DMT4000<br>20466 | chr07 | NO  | NO  |                                                                                                                                                                                                                       |
| 1235 | Heterozygous<br>PS in RH, not<br>shared by DM | PGSC0003DMG40000<br>7994 | PGSC0003DMT4000<br>20635 | chr12 | NO  | NO  |                                                                                                                                                                                                                       |
| 1236 | Heterozygous<br>PS in RH, not<br>shared by DM | PGSC0003DMG40000<br>7995 | PGSC0003DMT4000<br>20637 | chr04 | NO  | NO  |                                                                                                                                                                                                                       |
| 1237 | Heterozygous<br>PS in RH, not<br>shared by DM | PGSC0003DMG40000<br>8030 | PGSC0003DMT4000<br>20749 | chr04 | NO  | NO  |                                                                                                                                                                                                                       |
| 1238 | Heterozygous<br>PS in RH, not<br>shared by DM | PGSC0003DMG40200<br>8054 | PGSC0003DMT4000<br>20808 | chr03 | NO  | NO  |                                                                                                                                                                                                                       |
| 1239 | Heterozygous<br>PS in RH, not<br>shared by DM | PGSC0003DMG40000<br>8148 | PGSC0003DMT4000<br>21053 | chr05 | yes | NO  |                                                                                                                                                                                                                       |
| 1240 | Heterozygous<br>PS in RH, not<br>shared by DM | PGSC0003DMG40000<br>8176 | PGSC0003DMT4000<br>21111 | chr07 | yes | yes |                                                                                                                                                                                                                       |
| 1241 | Heterozygous<br>PS in RH, not<br>shared by DM | PGSC0003DMG40000<br>8267 | PGSC0003DMT4000<br>21318 | chr07 | yes | NO  |                                                                                                                                                                                                                       |
| 1242 | Heterozygous<br>PS in RH, not<br>shared by DM | PGSC0003DMG40000<br>8306 | PGSC0003DMT4000<br>21403 | chr07 | yes | NO  | GO:0004672; protein kinase activity;<br>Molecular Function GO:0005524; ATP<br>binding; Molecular Function<br>GO:0006468; protein amino acid<br>phosphorylation; Biological Process                                    |

|      |                                               |                          |                          |       |     |     |                                                                                                                                              |
|------|-----------------------------------------------|--------------------------|--------------------------|-------|-----|-----|----------------------------------------------------------------------------------------------------------------------------------------------|
| 1243 | Heterozygous<br>PS in RH, not<br>shared by DM | PGSC0003DMG40000<br>8308 | PGSC0003DMT4000<br>21420 | -     | yes | NO  | GO:0008152; metabolic process;<br>Biological Process GO:0016758;<br>transferase activity, transferring hexosyl<br>groups; Molecular Function |
| 1244 | Heterozygous<br>PS in RH, not<br>shared by DM | PGSC0003DMG40000<br>8323 | PGSC0003DMT4000<br>21449 | chr05 | NO  | NO  |                                                                                                                                              |
| 1245 | Heterozygous<br>PS in RH, not<br>shared by DM | PGSC0003DMG40000<br>8384 | PGSC0003DMT4000<br>21612 | chr01 | NO  | NO  |                                                                                                                                              |
| 1246 | Heterozygous<br>PS in RH, not<br>shared by DM | PGSC0003DMG40000<br>8394 | PGSC0003DMT4000<br>21634 | chr12 | NO  | NO  |                                                                                                                                              |
| 1247 | Heterozygous<br>PS in RH, not<br>shared by DM | PGSC0003DMG40000<br>8403 | PGSC0003DMT4000<br>21662 | chr04 | yes | NO  | GO:0005524; ATP binding; Molecular<br>Function GO:0006915; apoptosis;<br>Biological Process                                                  |
| 1248 | Heterozygous<br>PS in RH, not<br>shared by DM | PGSC0003DMG40000<br>8408 | PGSC0003DMT4000<br>21673 | chr03 | yes | yes |                                                                                                                                              |
| 1249 | Heterozygous<br>PS in RH, not<br>shared by DM | PGSC0003DMG40000<br>8410 | PGSC0003DMT4000<br>21675 | chr06 | NO  | NO  | GO:0005525; GTP binding; Molecular<br>Function                                                                                               |
| 1250 | Heterozygous<br>PS in RH, not<br>shared by DM | PGSC0003DMG40000<br>8411 | PGSC0003DMT4000<br>21679 | chr12 | NO  | NO  |                                                                                                                                              |
| 1251 | Heterozygous<br>PS in RH, not<br>shared by DM | PGSC0003DMG40000<br>8431 | PGSC0003DMT4000<br>21726 | chr04 | NO  | NO  |                                                                                                                                              |
| 1252 | Heterozygous<br>PS in RH, not<br>shared by DM | PGSC0003DMG40000<br>8432 | PGSC0003DMT4000<br>21731 | chr09 | yes | yes |                                                                                                                                              |
| 1253 | Heterozygous<br>PS in RH, not<br>shared by DM | PGSC0003DMG40000<br>8462 | PGSC0003DMT4000<br>21802 | chr05 | yes | NO  |                                                                                                                                              |

|      |                                               |                          |                          |       |     |     |                                                                                                                                                                                                                      |
|------|-----------------------------------------------|--------------------------|--------------------------|-------|-----|-----|----------------------------------------------------------------------------------------------------------------------------------------------------------------------------------------------------------------------|
| 1254 | Heterozygous<br>PS in RH, not<br>shared by DM | PGSC0003DMG40100<br>8474 | PGSC0003DMT4000<br>21832 | chr01 | yes | NO  | GO:0003700; transcription factor activity;<br>Molecular Function GO:0005667;<br>transcription factor complex; Cellular<br>Component GO:0006355; regulation of<br>transcription, DNA-dependent; Biological<br>Process |
| 1255 | Heterozygous<br>PS in RH, not<br>shared by DM | PGSC0003DMG40000<br>8519 | PGSC0003DMT4000<br>21970 | chr02 | yes | NO  |                                                                                                                                                                                                                      |
| 1256 | Heterozygous<br>PS in RH, not<br>shared by DM | PGSC0003DMG40000<br>8524 | PGSC0003DMT4000<br>21985 | chr06 | yes | yes |                                                                                                                                                                                                                      |
| 1257 | Heterozygous<br>PS in RH, not<br>shared by DM | PGSC0003DMG40000<br>8527 | PGSC0003DMT4000<br>21991 | chr12 | yes | NO  | GO:0003746; translation elongation factor<br>activity; Molecular Function<br>GO:0005622; intracellular; Cellular<br>Component GO:0006414; translational<br>elongation; Biological Process                            |
| 1258 | Heterozygous<br>PS in RH, not<br>shared by DM | PGSC0003DMG40000<br>8591 | PGSC0003DMT4000<br>22143 | chr03 | yes | NO  | GO:0047800; cysteamine dioxygenase<br>activity; Molecular Function<br>GO:0055114; oxidation reduction;<br>Biological Process                                                                                         |
| 1259 | Heterozygous<br>PS in RH, not<br>shared by DM | PGSC0003DMG40000<br>8597 | PGSC0003DMT4000<br>22163 |       |     |     |                                                                                                                                                                                                                      |
| 1260 | Heterozygous<br>PS in RH, not<br>shared by DM | PGSC0003DMG40000<br>8606 | PGSC0003DMT4000<br>22182 | chr05 | yes | NO  | GO:0004672; protein kinase activity;<br>Molecular Function GO:0005524; ATP<br>binding; Molecular Function<br>GO:0006468; protein amino acid<br>phosphorylation; Biological Process                                   |
| 1261 | Heterozygous<br>PS in RH, not<br>shared by DM | PGSC0003DMG40000<br>8614 | PGSC0003DMT4000<br>22195 | chr09 | yes | yes | GO:0016021; integral to membrane;<br>Cellular Component                                                                                                                                                              |
| 1262 | Heterozygous<br>PS in RH, not<br>shared by DM | PGSC0003DMG40000<br>8628 | PGSC0003DMT4000<br>22247 | chr03 | yes | NO  |                                                                                                                                                                                                                      |
| 1263 | Heterozygous<br>PS in RH, not<br>shared by DM | PGSC0003DMG40000<br>8633 | PGSC0003DMT4000<br>22255 | chr11 | yes | NO  |                                                                                                                                                                                                                      |

|      |                                               |                          |                          |       |     |     |                                                                                                                                                                                                                                                                      |
|------|-----------------------------------------------|--------------------------|--------------------------|-------|-----|-----|----------------------------------------------------------------------------------------------------------------------------------------------------------------------------------------------------------------------------------------------------------------------|
| 1264 | Heterozygous<br>PS in RH, not<br>shared by DM | PGSC0003DMG40000<br>8688 | PGSC0003DMT4000<br>22405 | chr01 | yes | yes |                                                                                                                                                                                                                                                                      |
| 1265 | Heterozygous<br>PS in RH, not<br>shared by DM | PGSC0003DMG40000<br>8733 | PGSC0003DMT4000<br>22527 | chr12 | NO  | NO  |                                                                                                                                                                                                                                                                      |
| 1266 | Heterozygous<br>PS in RH, not<br>shared by DM | PGSC0003DMG40000<br>8750 | PGSC0003DMT4000<br>22570 | chr04 | NO  | NO  | GO:0004811; tRNA<br>isopentenyltransferase activity; Molecular<br>Function GO:0005524; ATP binding;<br>Molecular Function GO:0008033; tRNA<br>processing; Biological Process                                                                                         |
| 1267 | Heterozygous<br>PS in RH, not<br>shared by DM | PGSC0003DMG40000<br>8806 | PGSC0003DMT4000<br>22705 | chr05 | yes | NO  |                                                                                                                                                                                                                                                                      |
| 1268 | Heterozygous<br>PS in RH, not<br>shared by DM | PGSC0003DMG40000<br>8845 | PGSC0003DMT4000<br>22798 | chr08 | yes | NO  | GO:0004252; serine-type endopeptidase<br>activity; Molecular Function<br>GO:0006508; proteolysis; Biological<br>Process GO:0042802; identical protein<br>binding; Molecular Function<br>GO:0043086; negative regulation of<br>catalytic activity; Biological Process |
| 1269 | Heterozygous<br>PS in RH, not<br>shared by DM | PGSC0003DMG40100<br>8856 | PGSC0003DMT4000<br>22843 | chr09 | yes | NO  |                                                                                                                                                                                                                                                                      |
| 1270 | Heterozygous<br>PS in RH, not<br>shared by DM | PGSC0003DMG40000<br>8887 | PGSC0003DMT4000<br>22937 | chr12 | NO  | NO  |                                                                                                                                                                                                                                                                      |
| 1271 | Heterozygous<br>PS in RH, not<br>shared by DM | PGSC0003DMG40000<br>8905 | PGSC0003DMT4000<br>23000 | chr12 | yes | NO  | GO:0005524; ATP binding; Molecular<br>Function GO:0006915; apoptosis;<br>Biological Process GO:0008168;<br>methyltransferase activity; Molecular<br>Function                                                                                                         |
| 1272 | Heterozygous<br>PS in RH, not<br>shared by DM | PGSC0003DMG40000<br>8907 | PGSC0003DMT4000<br>23009 | chr08 | yes | NO  | GO:0004713; protein tyrosine kinase<br>activity; Molecular Function<br>GO:0005524; ATP binding; Molecular<br>Function GO:0006468; protein amino acid<br>phosphorylation; Biological Process                                                                          |

|      |                                               |                          |                          |       |     |    |                                                                                                                                                                                                                                                                                                                                                                                                                                                                                                  |
|------|-----------------------------------------------|--------------------------|--------------------------|-------|-----|----|--------------------------------------------------------------------------------------------------------------------------------------------------------------------------------------------------------------------------------------------------------------------------------------------------------------------------------------------------------------------------------------------------------------------------------------------------------------------------------------------------|
| 1273 | Heterozygous<br>PS in RH, not<br>shared by DM | PGSC0003DMG40000<br>8911 | PGSC0003DMT4000<br>23024 | chr11 | NO  | NO |                                                                                                                                                                                                                                                                                                                                                                                                                                                                                                  |
| 1274 | Heterozygous<br>PS in RH, not<br>shared by DM | PGSC0003DMG40000<br>8939 | PGSC0003DMT4000<br>23083 | chr10 | NO  | NO |                                                                                                                                                                                                                                                                                                                                                                                                                                                                                                  |
| 1275 | Heterozygous<br>PS in RH, not<br>shared by DM | PGSC0003DMG40000<br>8942 | PGSC0003DMT4000<br>23090 | chr12 | yes | NO |                                                                                                                                                                                                                                                                                                                                                                                                                                                                                                  |
| 1276 | Heterozygous<br>PS in RH, not<br>shared by DM | PGSC0003DMG40200<br>8946 | PGSC0003DMT4000<br>23099 | chr06 | NO  | NO |                                                                                                                                                                                                                                                                                                                                                                                                                                                                                                  |
| 1277 | Heterozygous<br>PS in RH, not<br>shared by DM | PGSC0003DMG40000<br>9024 | PGSC0003DMT4000<br>23297 | chr07 | NO  | NO | GO:0004497; monooxygenase activity;<br>Molecular Function GO:0005506; iron ion<br>binding; Molecular Function<br>GO:0009055; electron carrier activity;<br>Molecular Function GO:0020037; heme<br>binding; Molecular Function<br>GO:0000156; two-component response<br>regulator activity; Molecular Function<br>GO:0000160; two-component signal<br>transduction system (phosphorelay);<br>Biological Process GO:0006355;<br>regulation of transcription, DNA-<br>dependent; Biological Process |
| 1278 | Heterozygous<br>PS in RH, not<br>shared by DM | PGSC0003DMG40000<br>9066 | PGSC0003DMT4000<br>23412 | chr12 | NO  | NO |                                                                                                                                                                                                                                                                                                                                                                                                                                                                                                  |
| 1279 | Heterozygous<br>PS in RH, not<br>shared by DM | PGSC0003DMG40000<br>9146 | PGSC0003DMT4000<br>23625 | chr03 | yes | NO |                                                                                                                                                                                                                                                                                                                                                                                                                                                                                                  |
| 1280 | Heterozygous<br>PS in RH, not<br>shared by DM | PGSC0003DMG40000<br>9149 | PGSC0003DMT4000<br>23639 | chr02 | NO  | NO |                                                                                                                                                                                                                                                                                                                                                                                                                                                                                                  |
| 1281 | Heterozygous<br>PS in RH, not<br>shared by DM | PGSC0003DMG40000<br>9160 | PGSC0003DMT4000<br>23680 | chr10 | yes | NO |                                                                                                                                                                                                                                                                                                                                                                                                                                                                                                  |
| 1282 | Heterozygous<br>PS in RH, not<br>shared by DM | PGSC0003DMG40000<br>9235 | PGSC0003DMT4000<br>23883 | chr11 | yes | NO |                                                                                                                                                                                                                                                                                                                                                                                                                                                                                                  |

|      |                                               |                          |                          |       |     |     |                                                                                                                                                                                                                                                                                                                                                                                                      |
|------|-----------------------------------------------|--------------------------|--------------------------|-------|-----|-----|------------------------------------------------------------------------------------------------------------------------------------------------------------------------------------------------------------------------------------------------------------------------------------------------------------------------------------------------------------------------------------------------------|
| 1283 | Heterozygous<br>PS in RH, not<br>shared by DM | PGSC0003DMG40000<br>9241 | PGSC0003DMT4000<br>23901 | chr06 | NO  | NO  |                                                                                                                                                                                                                                                                                                                                                                                                      |
| 1284 | Heterozygous<br>PS in RH, not<br>shared by DM | PGSC0003DMG40100<br>9270 | PGSC0003DMT4000<br>23968 | chr11 | NO  | NO  |                                                                                                                                                                                                                                                                                                                                                                                                      |
| 1285 | Heterozygous<br>PS in RH, not<br>shared by DM | PGSC0003DMG40200<br>9270 | PGSC0003DMT4000<br>23971 | chr04 | yes | yes |                                                                                                                                                                                                                                                                                                                                                                                                      |
| 1286 | Heterozygous<br>PS in RH, not<br>shared by DM | PGSC0003DMG40000<br>9284 | PGSC0003DMT4000<br>24004 | chr04 | NO  | NO  |                                                                                                                                                                                                                                                                                                                                                                                                      |
| 1287 | Heterozygous<br>PS in RH, not<br>shared by DM | PGSC0003DMG40100<br>9306 | PGSC0003DMT4000<br>24061 | -     | NO  | NO  | GO:0004672; protein kinase activity;<br>Molecular Function GO:0005524; ATP<br>binding; Molecular Function<br>GO:0006468; protein amino acid<br>phosphorylation; Biological Process                                                                                                                                                                                                                   |
| 1288 | Heterozygous<br>PS in RH, not<br>shared by DM | PGSC0003DMG40100<br>9323 | PGSC0003DMT4000<br>24108 | chr05 | yes | NO  |                                                                                                                                                                                                                                                                                                                                                                                                      |
| 1289 | Heterozygous<br>PS in RH, not<br>shared by DM | PGSC0003DMG40000<br>9339 | PGSC0003DMT4000<br>24161 | chr11 | yes | NO  | GO:0004888; transmembrane receptor<br>activity; Molecular Function<br>GO:0005515; protein binding; Molecular<br>Function GO:0005524; ATP binding;<br>Molecular Function GO:0006915;<br>apoptosis; Biological Process<br>GO:0007165; signal transduction;<br>Biological Process GO:0031224; intrinsic<br>to membrane; Cellular Component<br>GO:0045087; innate immune response;<br>Biological Process |
| 1290 | Heterozygous<br>PS in RH, not<br>shared by DM | PGSC0003DMG40000<br>9351 | PGSC0003DMT4000<br>24197 | -     | NO  | NO  |                                                                                                                                                                                                                                                                                                                                                                                                      |
| 1291 | Heterozygous<br>PS in RH, not<br>shared by DM | PGSC0003DMG40000<br>9352 | PGSC0003DMT4000<br>24201 | chr08 | yes | NO  |                                                                                                                                                                                                                                                                                                                                                                                                      |



|      |                                               |                          |                          |       |     |     |                                                                                                                                                                            |
|------|-----------------------------------------------|--------------------------|--------------------------|-------|-----|-----|----------------------------------------------------------------------------------------------------------------------------------------------------------------------------|
| 1292 | Heterozygous<br>PS in RH, not<br>shared by DM | PGSC0003DMG40200<br>9389 | PGSC0003DMT4000<br>24292 | chr09 | NO  | NO  |                                                                                                                                                                            |
| 1293 | Heterozygous<br>PS in RH, not<br>shared by DM | PGSC0003DMG40000<br>9462 | PGSC0003DMT4000<br>24475 | chr06 | yes | NO  |                                                                                                                                                                            |
| 1294 | Heterozygous<br>PS in RH, not<br>shared by DM | PGSC0003DMG40000<br>9532 | PGSC0003DMT4000<br>24635 | chr12 | NO  | NO  |                                                                                                                                                                            |
| 1295 | Heterozygous<br>PS in RH, not<br>shared by DM | PGSC0003DMG40000<br>9556 | PGSC0003DMT4000<br>24713 | chr02 | NO  | NO  | GO:0005622; intracellular; Cellular<br>Component GO:0008270; zinc ion<br>binding; Molecular Function                                                                       |
| 1296 | Heterozygous<br>PS in RH, not<br>shared by DM | PGSC0003DMG40000<br>9574 | PGSC0003DMT4000<br>24766 | chr12 | NO  | NO  |                                                                                                                                                                            |
| 1297 | Heterozygous<br>PS in RH, not<br>shared by DM | PGSC0003DMG40300<br>9595 | PGSC0003DMT4000<br>24816 | chr07 | yes | yes |                                                                                                                                                                            |
| 1298 | Heterozygous<br>PS in RH, not<br>shared by DM | PGSC0003DMG40000<br>9614 | PGSC0003DMT4000<br>24866 | chr08 | yes | NO  |                                                                                                                                                                            |
| 1299 | Heterozygous<br>PS in RH, not<br>shared by DM | PGSC0003DMG40000<br>9623 | PGSC0003DMT4000<br>24897 | chr10 | yes | NO  | GO:0003677; DNA binding; Molecular<br>Function GO:0003899; DNA-directed<br>RNA polymerase activity; Molecular<br>Function GO:0006350; transcription;<br>Biological Process |
| 1300 | Heterozygous<br>PS in RH, not<br>shared by DM | PGSC0003DMG40200<br>9628 | PGSC0003DMT4000<br>24909 | chr10 | yes | yes |                                                                                                                                                                            |
| 1301 | Heterozygous<br>PS in RH, not<br>shared by DM | PGSC0003DMG40000<br>9703 | PGSC0003DMT4000<br>25113 | chr12 | NO  | NO  | GO:0005515; protein binding; Molecular<br>Function                                                                                                                         |
| 1302 | Heterozygous<br>PS in RH, not<br>shared by DM | PGSC0003DMG40000<br>9715 | PGSC0003DMT4000<br>25139 | chr04 | yes | NO  | GO:0005515; protein binding; Molecular<br>Function                                                                                                                         |
| 1303 | Heterozygous<br>PS in RH, not<br>shared by DM | PGSC0003DMG40000<br>9721 | PGSC0003DMT4000<br>25155 | chr11 | yes | NO  |                                                                                                                                                                            |

|      |                                               |                          |                          |       |     |     |                                                                                                                    |
|------|-----------------------------------------------|--------------------------|--------------------------|-------|-----|-----|--------------------------------------------------------------------------------------------------------------------|
| 1304 | Heterozygous<br>PS in RH, not<br>shared by DM | PGSC0003DMG40000<br>9730 | PGSC0003DMT4000<br>25178 | chr12 | NO  | NO  |                                                                                                                    |
| 1305 | Heterozygous<br>PS in RH, not<br>shared by DM | PGSC0003DMG40100<br>9756 | PGSC0003DMT4000<br>25253 | chr01 | yes | NO  | GO:0005622; intracellular; Cellular<br>Component                                                                   |
| 1306 | Heterozygous<br>PS in RH, not<br>shared by DM | PGSC0003DMG40000<br>9785 | PGSC0003DMT4000<br>25346 | chr01 | yes | NO  | GO:0016747; transferase activity,<br>transferring acyl groups other than amino-<br>acyl groups; Molecular Function |
| 1307 | Heterozygous<br>PS in RH, not<br>shared by DM | PGSC0003DMG40000<br>9810 | PGSC0003DMT4000<br>25411 | -     | yes | NO  |                                                                                                                    |
| 1308 | Heterozygous<br>PS in RH, not<br>shared by DM | PGSC0003DMG40000<br>9848 | PGSC0003DMT4000<br>25502 | chr07 | yes | NO  |                                                                                                                    |
| 1309 | Heterozygous<br>PS in RH, not<br>shared by DM | PGSC0003DMG40000<br>9851 | PGSC0003DMT4000<br>25510 | chr07 | yes | yes |                                                                                                                    |
| 1310 | Heterozygous<br>PS in RH, not<br>shared by DM | PGSC0003DMG40000<br>9853 | PGSC0003DMT4000<br>25512 | chr09 | NO  | NO  |                                                                                                                    |
| 1311 | Heterozygous<br>PS in RH, not<br>shared by DM | PGSC0003DMG40000<br>9883 | PGSC0003DMT4000<br>25581 | chr12 | NO  | NO  |                                                                                                                    |
| 1312 | Heterozygous<br>PS in RH, not<br>shared by DM | PGSC0003DMG40000<br>9899 | PGSC0003DMT4000<br>25631 |       |     |     |                                                                                                                    |
| 1313 | Heterozygous<br>PS in RH, not<br>shared by DM | PGSC0003DMG40000<br>9901 | PGSC0003DMT4000<br>25634 | chr12 | yes | NO  |                                                                                                                    |
| 1314 | Heterozygous<br>PS in RH, not<br>shared by DM | PGSC0003DMG40000<br>9913 | PGSC0003DMT4000<br>25673 | chr07 | yes | NO  |                                                                                                                    |
| 1315 | Heterozygous<br>PS in RH, not<br>shared by DM | PGSC0003DMG40000<br>9944 | PGSC0003DMT4000<br>25759 | -     | NO  | NO  |                                                                                                                    |

|      |                                               |                          |                          |       |     |     |                                                                                                                                                                                                                                   |
|------|-----------------------------------------------|--------------------------|--------------------------|-------|-----|-----|-----------------------------------------------------------------------------------------------------------------------------------------------------------------------------------------------------------------------------------|
| 1316 | Heterozygous<br>PS in RH, not<br>shared by DM | PGSC0003DMG40001<br>0041 | PGSC0003DMT4000<br>26022 | -     | yes | yes | GO:0004672; protein kinase activity;<br>Molecular Function GO:0005524; ATP<br>binding; Molecular Function<br>GO:0006468; protein amino acid<br>phosphorylation; Biological Process                                                |
| 1317 | Heterozygous<br>PS in RH, not<br>shared by DM | PGSC0003DMG40001<br>0043 | PGSC0003DMT4000<br>26030 | chr12 | NO  | NO  |                                                                                                                                                                                                                                   |
| 1318 | Heterozygous<br>PS in RH, not<br>shared by DM | PGSC0003DMG40001<br>0055 | PGSC0003DMT4000<br>26062 | chr05 | yes | NO  |                                                                                                                                                                                                                                   |
| 1319 | Heterozygous<br>PS in RH, not<br>shared by DM | PGSC0003DMG40001<br>0082 | PGSC0003DMT4000<br>26154 | chr05 | yes | NO  |                                                                                                                                                                                                                                   |
| 1320 | Heterozygous<br>PS in RH, not<br>shared by DM | PGSC0003DMG40001<br>0086 | PGSC0003DMT4000<br>26172 | chr12 | yes | NO  |                                                                                                                                                                                                                                   |
| 1321 | Heterozygous<br>PS in RH, not<br>shared by DM | PGSC0003DMG40001<br>0094 | PGSC0003DMT4000<br>26194 | chr03 | NO  | NO  |                                                                                                                                                                                                                                   |
| 1322 | Heterozygous<br>PS in RH, not<br>shared by DM | PGSC0003DMG40001<br>0096 | PGSC0003DMT4000<br>26200 | chr03 | yes | yes |                                                                                                                                                                                                                                   |
| 1323 | Heterozygous<br>PS in RH, not<br>shared by DM | PGSC0003DMG40001<br>0137 | PGSC0003DMT4000<br>26272 | chr11 | yes | NO  | GO:0005524; ATP binding; Molecular<br>Function GO:0016020; membrane;<br>Cellular Component GO:0016887; ATPase<br>activity; Molecular Function                                                                                     |
| 1324 | Heterozygous<br>PS in RH, not<br>shared by DM | PGSC0003DMG40001<br>0150 | PGSC0003DMT4000<br>26296 | chr05 | NO  | NO  |                                                                                                                                                                                                                                   |
| 1325 | Heterozygous<br>PS in RH, not<br>shared by DM | PGSC0003DMG40001<br>0159 | PGSC0003DMT4000<br>26319 | chr02 | NO  | NO  | GO:0003676; nucleic acid binding;<br>Molecular Function GO:0004386; helicase<br>activity; Molecular Function<br>GO:0005524; ATP binding; Molecular<br>Function GO:0008026; ATP-dependent<br>helicase activity; Molecular Function |

|      |                                               |                          |                          |       |     |     |                                                                                                                                                                       |
|------|-----------------------------------------------|--------------------------|--------------------------|-------|-----|-----|-----------------------------------------------------------------------------------------------------------------------------------------------------------------------|
| 1326 | Heterozygous<br>PS in RH, not<br>shared by DM | PGSC0003DMG40001<br>0161 | PGSC0003DMT4000<br>26324 | chr09 | yes | NO  | GO:0031072; heat shock protein binding;<br>Molecular Function                                                                                                         |
| 1327 | Heterozygous<br>PS in RH, not<br>shared by DM | PGSC0003DMG40001<br>0180 | PGSC0003DMT4000<br>26391 | chr06 | yes | yes |                                                                                                                                                                       |
| 1328 | Heterozygous<br>PS in RH, not<br>shared by DM | PGSC0003DMG40001<br>0212 | PGSC0003DMT4000<br>26457 | chr07 | yes | NO  |                                                                                                                                                                       |
| 1329 | Heterozygous<br>PS in RH, not<br>shared by DM | PGSC0003DMG40001<br>0219 | PGSC0003DMT4000<br>26480 | chr09 | NO  | NO  |                                                                                                                                                                       |
| 1330 | Heterozygous<br>PS in RH, not<br>shared by DM | PGSC0003DMG40001<br>0253 | PGSC0003DMT4000<br>26556 | chr07 | NO  | NO  |                                                                                                                                                                       |
| 1331 | Heterozygous<br>PS in RH, not<br>shared by DM | PGSC0003DMG40001<br>0293 | PGSC0003DMT4000<br>26643 | chr10 | yes | NO  | GO:0019867; outer membrane; Cellular<br>Component                                                                                                                     |
| 1332 | Heterozygous<br>PS in RH, not<br>shared by DM | PGSC0003DMG40001<br>0299 | PGSC0003DMT4000<br>26654 | chr04 | NO  | NO  |                                                                                                                                                                       |
| 1333 | Heterozygous<br>PS in RH, not<br>shared by DM | PGSC0003DMG40001<br>0322 | PGSC0003DMT4000<br>26710 | chr02 | yes | NO  | GO:0000175; 3'-5'-exoribonuclease<br>activity; Molecular Function<br>GO:0003723; RNA binding; Molecular<br>Function GO:0006396; RNA processing;<br>Biological Process |
| 1334 | Heterozygous<br>PS in RH, not<br>shared by DM | PGSC0003DMG40001<br>0336 | PGSC0003DMT4000<br>26752 | chr04 | yes | NO  | GO:0005524; ATP binding; Molecular<br>Function GO:0006915; apoptosis;<br>Biological Process                                                                           |
| 1335 | Heterozygous<br>PS in RH, not<br>shared by DM | PGSC0003DMG40001<br>0353 | PGSC0003DMT4000<br>26828 | chr02 | yes | NO  | GO:0003993; acid phosphatase activity;<br>Molecular Function                                                                                                          |
| 1336 | Heterozygous<br>PS in RH, not<br>shared by DM | PGSC0003DMG40001<br>0372 | PGSC0003DMT4000<br>26882 | chr12 | yes | NO  |                                                                                                                                                                       |

|      |                                               |                          |                          |       |     |     |                                                                                                                                                                                                                                                                                            |
|------|-----------------------------------------------|--------------------------|--------------------------|-------|-----|-----|--------------------------------------------------------------------------------------------------------------------------------------------------------------------------------------------------------------------------------------------------------------------------------------------|
| 1337 | Heterozygous<br>PS in RH, not<br>shared by DM | PGSC0003DMG40001<br>0387 | PGSC0003DMT4000<br>26935 | chr06 | NO  | NO  | GO:0003700; transcription factor activity;<br>Molecular Function GO:0006355;<br>regulation of transcription, DNA-<br>dependent; Biological Process<br>GO:0043565; sequence-specific DNA<br>binding; Molecular Function<br>GO:0046983; protein dimerization<br>activity; Molecular Function |
| 1338 | Heterozygous<br>PS in RH, not<br>shared by DM | PGSC0003DMG40001<br>0461 | PGSC0003DMT4000<br>27122 | chr10 | yes | yes |                                                                                                                                                                                                                                                                                            |
| 1339 | Heterozygous<br>PS in RH, not<br>shared by DM | PGSC0003DMG40001<br>0467 | PGSC0003DMT4000<br>27134 | chr02 | NO  | NO  |                                                                                                                                                                                                                                                                                            |
| 1340 | Heterozygous<br>PS in RH, not<br>shared by DM | PGSC0003DMG40001<br>0493 | PGSC0003DMT4000<br>27205 | chr04 | NO  | NO  |                                                                                                                                                                                                                                                                                            |
| 1341 | Heterozygous<br>PS in RH, not<br>shared by DM | PGSC0003DMG40001<br>0548 | PGSC0003DMT4000<br>27351 | chr10 | yes | yes |                                                                                                                                                                                                                                                                                            |
| 1342 | Heterozygous<br>PS in RH, not<br>shared by DM | PGSC0003DMG40001<br>0611 | PGSC0003DMT4000<br>27525 | chr07 | yes | NO  | GO:0004672; protein kinase activity;<br>Molecular Function GO:0005515; protein<br>binding; Molecular Function<br>GO:0005524; ATP binding; Molecular<br>Function GO:0006468; protein amino acid<br>phosphorylation; Biological Process                                                      |
| 1343 | Heterozygous<br>PS in RH, not<br>shared by DM | PGSC0003DMG40001<br>0612 | PGSC0003DMT4000<br>27529 | chr09 | NO  | NO  |                                                                                                                                                                                                                                                                                            |
| 1344 | Heterozygous<br>PS in RH, not<br>shared by DM | PGSC0003DMG40201<br>0614 | PGSC0003DMT4000<br>27538 | chr06 | yes | NO  | GO:0004553; hydrolase activity,<br>hydrolyzing O-glycosyl compounds;<br>Molecular Function GO:0005529; sugar<br>binding; Molecular Function<br>GO:0005975; carbohydrate metabolic<br>process; Biological Process                                                                           |
| 1345 | Heterozygous<br>PS in RH, not<br>shared by DM | PGSC0003DMG40001<br>0678 | PGSC0003DMT4000<br>27709 | chr06 | NO  | NO  |                                                                                                                                                                                                                                                                                            |

|      |                                               |                          |                          |       |     |     |                                                                                                                                                                                                                                     |
|------|-----------------------------------------------|--------------------------|--------------------------|-------|-----|-----|-------------------------------------------------------------------------------------------------------------------------------------------------------------------------------------------------------------------------------------|
| 1346 | Heterozygous<br>PS in RH, not<br>shared by DM | PGSC0003DMG40001<br>0688 | PGSC0003DMT4000<br>27760 | chr11 | yes | yes |                                                                                                                                                                                                                                     |
| 1347 | Heterozygous<br>PS in RH, not<br>shared by DM | PGSC0003DMG40001<br>0700 | PGSC0003DMT4000<br>27792 | chr12 | yes | NO  | GO:0004650; polygalacturonase activity;<br>Molecular Function GO:0005975;<br>carbohydrate metabolic process;<br>Biological Process                                                                                                  |
| 1348 | Heterozygous<br>PS in RH, not<br>shared by DM | PGSC0003DMG40001<br>0703 | PGSC0003DMT4000<br>27805 | chr07 | yes | NO  |                                                                                                                                                                                                                                     |
| 1349 | Heterozygous<br>PS in RH, not<br>shared by DM | PGSC0003DMG40001<br>0717 | PGSC0003DMT4000<br>27835 | chr02 | yes | NO  | GO:0004806; triacylglycerol lipase<br>activity; Molecular Function<br>GO:0006629; lipid metabolic process;<br>Biological Process                                                                                                    |
| 1350 | Heterozygous<br>PS in RH, not<br>shared by DM | PGSC0003DMG40001<br>0801 | PGSC0003DMT4000<br>28010 | chr08 | yes | NO  | GO:0004672; protein kinase activity;<br>Molecular Function GO:0005524; ATP<br>binding; Molecular Function<br>GO:0005529; sugar binding; Molecular<br>Function GO:0006468; protein amino acid<br>phosphorylation; Biological Process |
| 1351 | Heterozygous<br>PS in RH, not<br>shared by DM | PGSC0003DMG40001<br>0857 | PGSC0003DMT4000<br>28148 | chr05 | yes | yes |                                                                                                                                                                                                                                     |
| 1352 | Heterozygous<br>PS in RH, not<br>shared by DM | PGSC0003DMG40001<br>0891 | PGSC0003DMT4000<br>28253 | chr12 | yes | NO  |                                                                                                                                                                                                                                     |
| 1353 | Heterozygous<br>PS in RH, not<br>shared by DM | PGSC0003DMG40001<br>0892 | PGSC0003DMT4000<br>28257 | chr01 | NO  | NO  |                                                                                                                                                                                                                                     |
| 1354 | Heterozygous<br>PS in RH, not<br>shared by DM | PGSC0003DMG40101<br>0896 | PGSC0003DMT4000<br>28272 | chr04 | NO  | NO  |                                                                                                                                                                                                                                     |
| 1355 | Heterozygous<br>PS in RH, not<br>shared by DM | PGSC0003DMG40001<br>0901 | PGSC0003DMT4000<br>28291 | -     | yes | NO  |                                                                                                                                                                                                                                     |

|      |                                         |                          |                          |       |     |     |                                                                                                                                                                                                                      |
|------|-----------------------------------------|--------------------------|--------------------------|-------|-----|-----|----------------------------------------------------------------------------------------------------------------------------------------------------------------------------------------------------------------------|
| 1356 | Heterozygous PS in RH, not shared by DM | PGSC0003DMG40001<br>0912 | PGSC0003DMT4000<br>28306 | chr11 | yes | yes | GO:0004497; monooxygenase activity; Molecular Function GO:0005506; iron ion binding; Molecular Function GO:0009055; electron carrier activity; Molecular Function GO:0020037; heme binding; Molecular Function       |
| 1357 | Heterozygous PS in RH, not shared by DM | PGSC0003DMG40001<br>0939 | PGSC0003DMT4000<br>28382 | chr06 | yes | NO  | GO:0005524; ATP binding; Molecular Function GO:0006915; apoptosis; Biological Process                                                                                                                                |
| 1358 | Heterozygous PS in RH, not shared by DM | PGSC0003DMG40301<br>0943 | PGSC0003DMT4000<br>28400 | chr06 | NO  | NO  |                                                                                                                                                                                                                      |
| 1359 | Heterozygous PS in RH, not shared by DM | PGSC0003DMG40001<br>0977 | PGSC0003DMT4000<br>28508 | chr03 | NO  | NO  | GO:0005789; endoplasmic reticulum membrane; Cellular Component GO:0006506; GPI anchor biosynthetic process; Biological Process GO:0016021; integral to membrane; Cellular Component                                  |
| 1360 | Heterozygous PS in RH, not shared by DM | PGSC0003DMG40101<br>0991 | PGSC0003DMT4000<br>28537 | chr08 | NO  | NO  |                                                                                                                                                                                                                      |
| 1361 | Heterozygous PS in RH, not shared by DM | PGSC0003DMG40001<br>1011 | PGSC0003DMT4000<br>28617 | chr03 | yes | NO  |                                                                                                                                                                                                                      |
| 1362 | Heterozygous PS in RH, not shared by DM | PGSC0003DMG40001<br>1065 | PGSC0003DMT4000<br>28752 | chr07 | yes | NO  | GO:0004672; protein kinase activity; Molecular Function GO:0005524; ATP binding; Molecular Function GO:0005529; sugar binding; Molecular Function GO:0006468; protein amino acid phosphorylation; Biological Process |
| 1363 | Heterozygous PS in RH, not shared by DM | PGSC0003DMG40001<br>1080 | PGSC0003DMT4000<br>28782 | chr04 | yes | yes |                                                                                                                                                                                                                      |
| 1364 | Heterozygous PS in RH, not shared by DM | PGSC0003DMG40001<br>1085 | PGSC0003DMT4000<br>28797 | chr06 | yes | NO  |                                                                                                                                                                                                                      |

|      |                                               |                          |                          |       |     |     |                                                                                                                                                                                                                                                                  |
|------|-----------------------------------------------|--------------------------|--------------------------|-------|-----|-----|------------------------------------------------------------------------------------------------------------------------------------------------------------------------------------------------------------------------------------------------------------------|
| 1365 | Heterozygous<br>PS in RH, not<br>shared by DM | PGSC0003DMG40001<br>1129 | PGSC0003DMT4000<br>28912 | chr10 | NO  | NO  |                                                                                                                                                                                                                                                                  |
| 1366 | Heterozygous<br>PS in RH, not<br>shared by DM | PGSC0003DMG40001<br>1142 | PGSC0003DMT4000<br>28944 | chr03 | yes | NO  | GO:0008565; protein transporter activity;<br>Molecular Function GO:0015031; protein<br>transport; Biological Process                                                                                                                                             |
| 1367 | Heterozygous<br>PS in RH, not<br>shared by DM | PGSC0003DMG40001<br>1219 | PGSC0003DMT4000<br>29173 | -     | NO  | NO  |                                                                                                                                                                                                                                                                  |
| 1368 | Heterozygous<br>PS in RH, not<br>shared by DM | PGSC0003DMG40001<br>1277 | PGSC0003DMT4000<br>29351 | chr10 | yes | NO  | GO:0016020; membrane; Cellular<br>Component                                                                                                                                                                                                                      |
| 1369 | Heterozygous<br>PS in RH, not<br>shared by DM | PGSC0003DMG40101<br>1400 | PGSC0003DMT4000<br>29652 | chr10 | NO  | NO  | GO:0003700; transcription factor activity;<br>Molecular Function GO:0005634;<br>nucleus; Cellular Component<br>GO:0006355; regulation of transcription,<br>DNA-dependent; Biological Process<br>GO:0043565; sequence-specific DNA<br>binding; Molecular Function |
| 1370 | Heterozygous<br>PS in RH, not<br>shared by DM | PGSC0003DMG40001<br>1445 | PGSC0003DMT4000<br>29782 | chr12 | NO  | NO  | GO:0016757; transferase activity,<br>transferring glycosyl groups; Molecular<br>Function                                                                                                                                                                         |
| 1371 | Heterozygous<br>PS in RH, not<br>shared by DM | PGSC0003DMG40001<br>1472 | PGSC0003DMT4000<br>29849 | chr12 | NO  | NO  | GO:0003700; transcription factor activity;<br>Molecular Function GO:0006355;<br>regulation of transcription, DNA-<br>dependent; Biological Process                                                                                                               |
| 1372 | Heterozygous<br>PS in RH, not<br>shared by DM | PGSC0003DMG40001<br>1477 | PGSC0003DMT4000<br>29866 | chr07 | yes | yes | GO:0004553; hydrolase activity,<br>hydrolyzing O-glycosyl compounds;<br>Molecular Function GO:0005975;<br>carbohydrate metabolic process;<br>Biological Process                                                                                                  |
| 1373 | Heterozygous<br>PS in RH, not<br>shared by DM | PGSC0003DMG40001<br>1518 | PGSC0003DMT4000<br>30012 | chr12 | NO  | NO  |                                                                                                                                                                                                                                                                  |
| 1374 | Heterozygous<br>PS in RH, not<br>shared by DM | PGSC0003DMG40201<br>1540 | PGSC0003DMT4000<br>30118 | chr07 | yes | NO  |                                                                                                                                                                                                                                                                  |



|      |                                               |                          |                          |       |     |     |                                                                                                                                                                                                                               |
|------|-----------------------------------------------|--------------------------|--------------------------|-------|-----|-----|-------------------------------------------------------------------------------------------------------------------------------------------------------------------------------------------------------------------------------|
| 1375 | Heterozygous<br>PS in RH, not<br>shared by DM | PGSC0003DMG40001<br>1542 | PGSC0003DMT4000<br>30126 | chr04 | yes | yes | GO:0004497; monooxygenase activity;<br>Molecular Function GO:0005506; iron ion<br>binding; Molecular Function<br>GO:0009055; electron carrier activity;<br>Molecular Function GO:0020037; heme<br>binding; Molecular Function |
| 1376 | Heterozygous<br>PS in RH, not<br>shared by DM | PGSC0003DMG40101<br>1559 | PGSC0003DMT4000<br>30207 | -     | yes | yes |                                                                                                                                                                                                                               |
| 1377 | Heterozygous<br>PS in RH, not<br>shared by DM | PGSC0003DMG40001<br>1562 | PGSC0003DMT4000<br>30219 | chr11 | yes | yes | GO:0003723; RNA binding; Molecular<br>Function GO:0004540; ribonuclease<br>activity; Molecular Function                                                                                                                       |
| 1378 | Heterozygous<br>PS in RH, not<br>shared by DM | PGSC0003DMG40001<br>1612 | PGSC0003DMT4000<br>30342 | chr09 | NO  | NO  |                                                                                                                                                                                                                               |
| 1379 | Heterozygous<br>PS in RH, not<br>shared by DM | PGSC0003DMG40001<br>1616 | PGSC0003DMT4000<br>30358 | chr03 | yes | NO  |                                                                                                                                                                                                                               |
| 1380 | Heterozygous<br>PS in RH, not<br>shared by DM | PGSC0003DMG40001<br>1629 | PGSC0003DMT4000<br>30383 | chr05 | yes | NO  | GO:0008152; metabolic process;<br>Biological Process GO:0016758;<br>transferase activity, transferring hexosyl<br>groups; Molecular Function                                                                                  |
| 1381 | Heterozygous<br>PS in RH, not<br>shared by DM | PGSC0003DMG40001<br>1633 | PGSC0003DMT4000<br>30388 | chr06 | NO  | NO  |                                                                                                                                                                                                                               |
| 1382 | Heterozygous<br>PS in RH, not<br>shared by DM | PGSC0003DMG40001<br>1670 | PGSC0003DMT4000<br>30473 | chr12 | yes | NO  |                                                                                                                                                                                                                               |
| 1383 | Heterozygous<br>PS in RH, not<br>shared by DM | PGSC0003DMG40001<br>1678 | PGSC0003DMT4000<br>30484 | -     | yes | NO  | GO:0016765; transferase activity,<br>transferring alkyl or aryl (other than<br>methyl) groups; Molecular Function                                                                                                             |
| 1384 | Heterozygous<br>PS in RH, not<br>shared by DM | PGSC0003DMG40301<br>1681 | PGSC0003DMT4000<br>30502 | chr01 | yes | NO  |                                                                                                                                                                                                                               |
| 1385 | Heterozygous<br>PS in RH, not<br>shared by DM | PGSC0003DMG40001<br>1683 | PGSC0003DMT4000<br>30505 | chr10 | yes | NO  |                                                                                                                                                                                                                               |

|      |                                               |                          |                          |       |     |     |                                                                                                                                                                                                                        |
|------|-----------------------------------------------|--------------------------|--------------------------|-------|-----|-----|------------------------------------------------------------------------------------------------------------------------------------------------------------------------------------------------------------------------|
| 1386 | Heterozygous<br>PS in RH, not<br>shared by DM | PGSC0003DMG40001<br>1691 | PGSC0003DMT4000<br>30530 | chr12 | yes | NO  | GO:0016020; membrane; Cellular<br>Component                                                                                                                                                                            |
| 1387 | Heterozygous<br>PS in RH, not<br>shared by DM | PGSC0003DMG40001<br>1723 | PGSC0003DMT4000<br>30611 | chr08 | yes | yes |                                                                                                                                                                                                                        |
| 1388 | Heterozygous<br>PS in RH, not<br>shared by DM | PGSC0003DMG40001<br>1729 | PGSC0003DMT4000<br>30624 | chr11 | yes | NO  |                                                                                                                                                                                                                        |
| 1389 | Heterozygous<br>PS in RH, not<br>shared by DM | PGSC0003DMG40001<br>1764 | PGSC0003DMT4000<br>30707 | chr02 | yes | NO  |                                                                                                                                                                                                                        |
| 1390 | Heterozygous<br>PS in RH, not<br>shared by DM | PGSC0003DMG40001<br>1786 | PGSC0003DMT4000<br>30769 | chr02 | yes | yes | GO:0003700; transcription factor activity;<br>Molecular Function GO:0006355;<br>regulation of transcription, DNA-<br>dependent; Biological Process<br>GO:0043565; sequence-specific DNA<br>binding; Molecular Function |
| 1391 | Heterozygous<br>PS in RH, not<br>shared by DM | PGSC0003DMG40001<br>1793 | PGSC0003DMT4000<br>30787 | chr06 | NO  | NO  |                                                                                                                                                                                                                        |
| 1392 | Heterozygous<br>PS in RH, not<br>shared by DM | PGSC0003DMG40201<br>1794 | PGSC0003DMT4000<br>30789 | chr10 | yes | NO  | GO:0006457; protein folding; Biological<br>Process                                                                                                                                                                     |
| 1393 | Heterozygous<br>PS in RH, not<br>shared by DM | PGSC0003DMG40001<br>1829 | PGSC0003DMT4000<br>30871 | chr08 | yes | NO  |                                                                                                                                                                                                                        |
| 1394 | Heterozygous<br>PS in RH, not<br>shared by DM | PGSC0003DMG40001<br>1892 | PGSC0003DMT4000<br>31047 | chr06 | yes | yes |                                                                                                                                                                                                                        |
| 1395 | Heterozygous<br>PS in RH, not<br>shared by DM | PGSC0003DMG40001<br>1907 | PGSC0003DMT4000<br>31082 | chr11 | NO  | NO  |                                                                                                                                                                                                                        |
| 1396 | Heterozygous<br>PS in RH, not<br>shared by DM | PGSC0003DMG40001<br>1977 | PGSC0003DMT4000<br>31252 | chr04 | NO  | NO  |                                                                                                                                                                                                                        |

|      |                                               |                          |                          |       |     |     |                                                                                                                                                                                                                                                                                                                                                |
|------|-----------------------------------------------|--------------------------|--------------------------|-------|-----|-----|------------------------------------------------------------------------------------------------------------------------------------------------------------------------------------------------------------------------------------------------------------------------------------------------------------------------------------------------|
| 1397 | Heterozygous<br>PS in RH, not<br>shared by DM | PGSC0003DMG40001<br>1978 | PGSC0003DMT4000<br>31254 | chr11 | yes | NO  | GO:0004888; transmembrane receptor<br>activity; Molecular Function<br>GO:0007165; signal transduction;<br>Biological Process GO:0031224; intrinsic<br>to membrane; Cellular Component<br>GO:0045087; innate immune response;<br>Biological Process                                                                                             |
| 1398 | Heterozygous<br>PS in RH, not<br>shared by DM | PGSC0003DMG40001<br>2042 | PGSC0003DMT4000<br>31413 | chr04 | yes | NO  | GO:0004553; hydrolase activity,<br>hydrolyzing O-glycosyl compounds;<br>Molecular Function GO:0005975;<br>carbohydrate metabolic process;<br>Biological Process                                                                                                                                                                                |
| 1399 | Heterozygous<br>PS in RH, not<br>shared by DM | PGSC0003DMG40001<br>2053 | PGSC0003DMT4000<br>31434 | chr11 | yes | NO  | GO:0004888; transmembrane receptor<br>activity; Molecular Function<br>GO:0005524; ATP binding; Molecular<br>Function GO:0006915; apoptosis;<br>Biological Process GO:0007165; signal<br>transduction; Biological Process<br>GO:0031224; intrinsic to membrane;<br>Cellular Component GO:0045087; innate<br>immune response; Biological Process |
| 1400 | Heterozygous<br>PS in RH, not<br>shared by DM | PGSC0003DMG40001<br>2068 | PGSC0003DMT4000<br>31469 | chr02 | yes | yes |                                                                                                                                                                                                                                                                                                                                                |
| 1401 | Heterozygous<br>PS in RH, not<br>shared by DM | PGSC0003DMG40001<br>2083 | PGSC0003DMT4000<br>31515 | chr12 | NO  | NO  | GO:0003676; nucleic acid binding;<br>Molecular Function GO:0008270; zinc ion<br>binding; Molecular Function                                                                                                                                                                                                                                    |
| 1402 | Heterozygous<br>PS in RH, not<br>shared by DM | PGSC0003DMG40001<br>2134 | PGSC0003DMT4000<br>31636 | chr04 | yes | yes |                                                                                                                                                                                                                                                                                                                                                |
| 1403 | Heterozygous<br>PS in RH, not<br>shared by DM | PGSC0003DMG40001<br>2166 | PGSC0003DMT4000<br>31711 | chr10 | NO  | NO  | GO:0005525; GTP binding; Molecular<br>Function                                                                                                                                                                                                                                                                                                 |
| 1404 | Heterozygous<br>PS in RH, not<br>shared by DM | PGSC0003DMG40001<br>2208 | PGSC0003DMT4000<br>31822 | chr09 | yes | NO  | GO:0004672; protein kinase activity;<br>Molecular Function GO:0005524; ATP<br>binding; Molecular Function<br>GO:0006468; protein amino acid<br>phosphorylation; Biological Process                                                                                                                                                             |

|      |                                               |                          |                          |       |     |     |                                                                                                                                                                                                                                                                                            |
|------|-----------------------------------------------|--------------------------|--------------------------|-------|-----|-----|--------------------------------------------------------------------------------------------------------------------------------------------------------------------------------------------------------------------------------------------------------------------------------------------|
| 1405 | Heterozygous<br>PS in RH, not<br>shared by DM | PGSC0003DMG40001<br>2213 | PGSC0003DMT4000<br>31836 | chr09 | NO  | NO  |                                                                                                                                                                                                                                                                                            |
| 1406 | Heterozygous<br>PS in RH, not<br>shared by DM | PGSC0003DMG40101<br>2256 | PGSC0003DMT4000<br>31941 | chr06 | NO  | NO  |                                                                                                                                                                                                                                                                                            |
| 1407 | Heterozygous<br>PS in RH, not<br>shared by DM | PGSC0003DMG40001<br>2265 | PGSC0003DMT4000<br>31974 | -     | yes | NO  | GO:0045735; nutrient reservoir activity;<br>Molecular Function                                                                                                                                                                                                                             |
| 1408 | Heterozygous<br>PS in RH, not<br>shared by DM | PGSC0003DMG40001<br>2277 | PGSC0003DMT4000<br>32002 | chr09 | NO  | NO  |                                                                                                                                                                                                                                                                                            |
| 1409 | Heterozygous<br>PS in RH, not<br>shared by DM | PGSC0003DMG40001<br>2284 | PGSC0003DMT4000<br>32020 | chr12 | NO  | NO  |                                                                                                                                                                                                                                                                                            |
| 1410 | Heterozygous<br>PS in RH, not<br>shared by DM | PGSC0003DMG40001<br>2288 | PGSC0003DMT4000<br>32028 | chr10 | NO  | NO  | GO:0004601; peroxidase activity;<br>Molecular Function GO:0006979;<br>response to oxidative stress; Biological<br>Process GO:0020037; heme binding;<br>Molecular Function GO:0055114;<br>oxidation reduction; Biological Process                                                           |
| 1411 | Heterozygous<br>PS in RH, not<br>shared by DM | PGSC0003DMG40001<br>2311 | PGSC0003DMT4000<br>32077 | chr07 | yes | yes |                                                                                                                                                                                                                                                                                            |
| 1412 | Heterozygous<br>PS in RH, not<br>shared by DM | PGSC0003DMG40001<br>2320 | PGSC0003DMT4000<br>32094 | chr02 | yes | NO  |                                                                                                                                                                                                                                                                                            |
| 1413 | Heterozygous<br>PS in RH, not<br>shared by DM | PGSC0003DMG40101<br>2324 | PGSC0003DMT4000<br>32102 | chr04 | NO  | NO  | GO:0003700; transcription factor activity;<br>Molecular Function GO:0006355;<br>regulation of transcription, DNA-<br>dependent; Biological Process<br>GO:0043565; sequence-specific DNA<br>binding; Molecular Function<br>GO:0046983; protein dimerization<br>activity; Molecular Function |
| 1414 | Heterozygous<br>PS in RH, not<br>shared by DM | PGSC0003DMG40001<br>2326 | PGSC0003DMT4000<br>32107 | chr01 | NO  | NO  |                                                                                                                                                                                                                                                                                            |

|      |                                               |                          |                          |       |     |     |                                                                                                                                                                                    |
|------|-----------------------------------------------|--------------------------|--------------------------|-------|-----|-----|------------------------------------------------------------------------------------------------------------------------------------------------------------------------------------|
| 1415 | Heterozygous<br>PS in RH, not<br>shared by DM | PGSC0003DMG40001<br>2408 | PGSC0003DMT4000<br>32307 | chr11 | NO  | NO  |                                                                                                                                                                                    |
| 1416 | Heterozygous<br>PS in RH, not<br>shared by DM | PGSC0003DMG40001<br>2417 | PGSC0003DMT4000<br>32327 | chr06 | NO  | NO  | GO:0016747; transferase activity,<br>transferring acyl groups other than amino-<br>acyl groups; Molecular Function                                                                 |
| 1417 | Heterozygous<br>PS in RH, not<br>shared by DM | PGSC0003DMG40001<br>2466 | PGSC0003DMT4000<br>32442 | chr09 | yes | yes |                                                                                                                                                                                    |
| 1418 | Heterozygous<br>PS in RH, not<br>shared by DM | PGSC0003DMG40001<br>2470 | PGSC0003DMT4000<br>32453 | chr12 | yes | NO  | GO:0005524; ATP binding; Molecular<br>Function                                                                                                                                     |
| 1419 | Heterozygous<br>PS in RH, not<br>shared by DM | PGSC0003DMG40001<br>2471 | PGSC0003DMT4000<br>32454 | chr03 | NO  | NO  | GO:0008152; metabolic process;<br>Biological Process GO:0016491;<br>oxidoreductase activity; Molecular<br>Function                                                                 |
| 1420 | Heterozygous<br>PS in RH, not<br>shared by DM | PGSC0003DMG40101<br>2477 | PGSC0003DMT4000<br>32484 | chr09 | yes | NO  |                                                                                                                                                                                    |
| 1421 | Heterozygous<br>PS in RH, not<br>shared by DM | PGSC0003DMG40001<br>2488 | PGSC0003DMT4000<br>32512 | -     | yes | NO  |                                                                                                                                                                                    |
| 1422 | Heterozygous<br>PS in RH, not<br>shared by DM | PGSC0003DMG40001<br>2489 | PGSC0003DMT4000<br>32514 | chr09 | NO  | NO  |                                                                                                                                                                                    |
| 1423 | Heterozygous<br>PS in RH, not<br>shared by DM | PGSC0003DMG40001<br>2514 | PGSC0003DMT4000<br>32577 | chr07 | yes | yes | GO:0005515; protein binding; Molecular<br>Function                                                                                                                                 |
| 1424 | Heterozygous<br>PS in RH, not<br>shared by DM | PGSC0003DMG40001<br>2539 | PGSC0003DMT4000<br>32641 | chr05 | yes | NO  | GO:0004672; protein kinase activity;<br>Molecular Function GO:0005524; ATP<br>binding; Molecular Function<br>GO:0006468; protein amino acid<br>phosphorylation; Biological Process |
| 1425 | Heterozygous<br>PS in RH, not<br>shared by DM | PGSC0003DMG40001<br>2540 | PGSC0003DMT4000<br>32643 | chr12 | yes | NO  |                                                                                                                                                                                    |

|      |                                               |                          |                          |       |     |     |                                                                                                                                                                                              |
|------|-----------------------------------------------|--------------------------|--------------------------|-------|-----|-----|----------------------------------------------------------------------------------------------------------------------------------------------------------------------------------------------|
| 1426 | Heterozygous<br>PS in RH, not<br>shared by DM | PGSC0003DMG40001<br>2541 | PGSC0003DMT4000<br>32646 | chr03 | yes | NO  | GO:0016491; oxidoreductase activity;<br>Molecular Function                                                                                                                                   |
| 1427 | Heterozygous<br>PS in RH, not<br>shared by DM | PGSC0003DMG40001<br>2543 | PGSC0003DMT4000<br>32652 | chr12 | yes | NO  |                                                                                                                                                                                              |
| 1428 | Heterozygous<br>PS in RH, not<br>shared by DM | PGSC0003DMG40001<br>2599 | PGSC0003DMT4000<br>32806 | chr07 | NO  | NO  |                                                                                                                                                                                              |
| 1429 | Heterozygous<br>PS in RH, not<br>shared by DM | PGSC0003DMG40001<br>2605 | PGSC0003DMT4000<br>32823 | chr09 | NO  | NO  |                                                                                                                                                                                              |
| 1430 | Heterozygous<br>PS in RH, not<br>shared by DM | PGSC0003DMG40001<br>2634 | PGSC0003DMT4000<br>32889 | chr01 | yes | yes |                                                                                                                                                                                              |
| 1431 | Heterozygous<br>PS in RH, not<br>shared by DM | PGSC0003DMG40001<br>2689 | PGSC0003DMT4000<br>33049 | chr11 | yes | NO  |                                                                                                                                                                                              |
| 1432 | Heterozygous<br>PS in RH, not<br>shared by DM | PGSC0003DMG40001<br>2757 | PGSC0003DMT4000<br>33221 | chr05 | yes | NO  |                                                                                                                                                                                              |
| 1433 | Heterozygous<br>PS in RH, not<br>shared by DM | PGSC0003DMG40001<br>2762 | PGSC0003DMT4000<br>33232 | chr04 | yes | yes |                                                                                                                                                                                              |
| 1434 | Heterozygous<br>PS in RH, not<br>shared by DM | PGSC0003DMG40001<br>2780 | PGSC0003DMT4000<br>33273 | chr07 | yes | yes | GO:0009538; photosystem I reaction<br>center; Cellular Component GO:0015979;<br>photosynthesis; Biological Process                                                                           |
| 1435 | Heterozygous<br>PS in RH, not<br>shared by DM | PGSC0003DMG40001<br>2789 | PGSC0003DMT4000<br>33300 | chr11 | NO  | NO  |                                                                                                                                                                                              |
| 1436 | Heterozygous<br>PS in RH, not<br>shared by DM | PGSC0003DMG40001<br>2793 | PGSC0003DMT4000<br>33309 | chr08 | NO  | NO  | GO:0008060; ARF GTPase activator<br>activity; Molecular Function<br>GO:0008270; zinc ion binding; Molecular<br>Function GO:0032312; regulation of ARF<br>GTPase activity; Biological Process |

|      |                                               |                          |                          |       |     |     |                                                                                                                                                                                                                                                                                                                          |
|------|-----------------------------------------------|--------------------------|--------------------------|-------|-----|-----|--------------------------------------------------------------------------------------------------------------------------------------------------------------------------------------------------------------------------------------------------------------------------------------------------------------------------|
| 1437 | Heterozygous<br>PS in RH, not<br>shared by DM | PGSC0003DMG40001<br>2799 | PGSC0003DMT4000<br>33322 | chr01 | NO  | NO  |                                                                                                                                                                                                                                                                                                                          |
| 1438 | Heterozygous<br>PS in RH, not<br>shared by DM | PGSC0003DMG40001<br>2860 | PGSC0003DMT4000<br>33477 | chr10 | NO  | NO  | GO:0003824; catalytic activity; Molecular<br>Function GO:0004794; L-threonine<br>ammonia-lyase activity; Molecular<br>Function GO:0008152; metabolic process;<br>Biological Process GO:0009097;<br>isoleucine biosynthetic process; Biological<br>Process GO:0030170; pyridoxal<br>phosphate binding; Molecular Function |
| 1439 | Heterozygous<br>PS in RH, not<br>shared by DM | PGSC0003DMG40001<br>2917 | PGSC0003DMT4000<br>33632 | chr01 | yes | NO  | GO:0004185; serine-type<br>carboxypeptidase activity; Molecular<br>Function GO:0006508; proteolysis;<br>Biological Process                                                                                                                                                                                               |
| 1440 | Heterozygous<br>PS in RH, not<br>shared by DM | PGSC0003DMG40301<br>2981 | PGSC0003DMT4000<br>33790 | chr07 | yes | NO  |                                                                                                                                                                                                                                                                                                                          |
| 1441 | Heterozygous<br>PS in RH, not<br>shared by DM | PGSC0003DMG40001<br>2993 | PGSC0003DMT4000<br>33818 | chr07 | yes | yes | GO:0016491; oxidoreductase activity;<br>Molecular Function GO:0050660; FAD<br>binding; Molecular Function                                                                                                                                                                                                                |
| 1442 | Heterozygous<br>PS in RH, not<br>shared by DM | PGSC0003DMG40201<br>3075 | PGSC0003DMT4000<br>34013 | -     | NO  | NO  |                                                                                                                                                                                                                                                                                                                          |
| 1443 | Heterozygous<br>PS in RH, not<br>shared by DM | PGSC0003DMG40001<br>3091 | PGSC0003DMT4000<br>34063 | chr09 | yes | yes | GO:0004713; protein tyrosine kinase<br>activity; Molecular Function<br>GO:0005524; ATP binding; Molecular<br>Function GO:0006468; protein amino acid<br>phosphorylation; Biological Process                                                                                                                              |
| 1444 | Heterozygous<br>PS in RH, not<br>shared by DM | PGSC0003DMG40001<br>3164 | PGSC0003DMT4000<br>34241 | chr01 | NO  | NO  |                                                                                                                                                                                                                                                                                                                          |
| 1445 | Heterozygous<br>PS in RH, not<br>shared by DM | PGSC0003DMG40001<br>3171 | PGSC0003DMT4000<br>34262 | chr11 | yes | NO  |                                                                                                                                                                                                                                                                                                                          |

|      |                                               |                          |                          |       |     |     |                                                                                                                                                                                                                                                                                                                                                                                                      |
|------|-----------------------------------------------|--------------------------|--------------------------|-------|-----|-----|------------------------------------------------------------------------------------------------------------------------------------------------------------------------------------------------------------------------------------------------------------------------------------------------------------------------------------------------------------------------------------------------------|
| 1446 | Heterozygous<br>PS in RH, not<br>shared by DM | PGSC0003DMG40101<br>3193 | PGSC0003DMT4000<br>34309 | chr12 | yes | NO  | GO:0004888; transmembrane receptor<br>activity; Molecular Function<br>GO:0005515; protein binding; Molecular<br>Function GO:0005524; ATP binding;<br>Molecular Function GO:0006915;<br>apoptosis; Biological Process<br>GO:0007165; signal transduction;<br>Biological Process GO:0031224; intrinsic<br>to membrane; Cellular Component<br>GO:0045087; innate immune response;<br>Biological Process |
| 1447 | Heterozygous<br>PS in RH, not<br>shared by DM | PGSC0003DMG40201<br>3193 | PGSC0003DMT4000<br>34311 | chr10 | yes | yes |                                                                                                                                                                                                                                                                                                                                                                                                      |
| 1448 | Heterozygous<br>PS in RH, not<br>shared by DM | PGSC0003DMG40201<br>3284 | PGSC0003DMT4000<br>34560 | chr06 | NO  | NO  |                                                                                                                                                                                                                                                                                                                                                                                                      |
| 1449 | Heterozygous<br>PS in RH, not<br>shared by DM | PGSC0003DMG40001<br>3286 | PGSC0003DMT4000<br>34564 | -     | yes | NO  |                                                                                                                                                                                                                                                                                                                                                                                                      |
| 1450 | Heterozygous<br>PS in RH, not<br>shared by DM | PGSC0003DMG40001<br>3355 | PGSC0003DMT4000<br>34759 | chr07 | yes | yes | GO:0008152; metabolic process;<br>Biological Process GO:0016758;<br>transferase activity, transferring hexosyl<br>groups; Molecular Function                                                                                                                                                                                                                                                         |
| 1451 | Heterozygous<br>PS in RH, not<br>shared by DM | PGSC0003DMG40001<br>3376 | PGSC0003DMT4000<br>34800 | -     | yes | NO  |                                                                                                                                                                                                                                                                                                                                                                                                      |
| 1452 | Heterozygous<br>PS in RH, not<br>shared by DM | PGSC0003DMG40001<br>3378 | PGSC0003DMT4000<br>34805 | chr10 | yes | NO  |                                                                                                                                                                                                                                                                                                                                                                                                      |
| 1453 | Heterozygous<br>PS in RH, not<br>shared by DM | PGSC0003DMG40001<br>3424 | PGSC0003DMT4000<br>34923 | chr09 | NO  | NO  |                                                                                                                                                                                                                                                                                                                                                                                                      |
| 1454 | Heterozygous<br>PS in RH, not<br>shared by DM | PGSC0003DMG40001<br>3435 | PGSC0003DMT4000<br>34955 | chr12 | NO  | NO  |                                                                                                                                                                                                                                                                                                                                                                                                      |



|      |                                               |                          |                          |       |     |     |                                                                                                                                                                                                                                          |
|------|-----------------------------------------------|--------------------------|--------------------------|-------|-----|-----|------------------------------------------------------------------------------------------------------------------------------------------------------------------------------------------------------------------------------------------|
| 1455 | Heterozygous<br>PS in RH, not<br>shared by DM | PGSC0003DMG40001<br>3462 | PGSC0003DMT4000<br>35008 | chr12 | yes | yes | GO:0008152; metabolic process;<br>Biological Process GO:0016758;<br>transferase activity, transferring hexosyl<br>groups; Molecular Function                                                                                             |
| 1456 | Heterozygous<br>PS in RH, not<br>shared by DM | PGSC0003DMG40001<br>3490 | PGSC0003DMT4000<br>35090 | chr09 | NO  | NO  |                                                                                                                                                                                                                                          |
| 1457 | Heterozygous<br>PS in RH, not<br>shared by DM | PGSC0003DMG40001<br>3495 | PGSC0003DMT4000<br>35099 | chr11 | NO  | NO  |                                                                                                                                                                                                                                          |
| 1458 | Heterozygous<br>PS in RH, not<br>shared by DM | PGSC0003DMG40201<br>3517 | PGSC0003DMT4000<br>35167 | chr04 | NO  | NO  |                                                                                                                                                                                                                                          |
| 1459 | Heterozygous<br>PS in RH, not<br>shared by DM | PGSC0003DMG40001<br>3520 | PGSC0003DMT4000<br>35180 | chr12 | yes | yes | GO:0016740; transferase activity;<br>Molecular Function                                                                                                                                                                                  |
| 1460 | Heterozygous<br>PS in RH, not<br>shared by DM | PGSC0003DMG40101<br>3522 | PGSC0003DMT4000<br>35183 | chr11 | yes | NO  |                                                                                                                                                                                                                                          |
| 1461 | Heterozygous<br>PS in RH, not<br>shared by DM | PGSC0003DMG40001<br>3567 | PGSC0003DMT4000<br>35311 | chr08 | yes | NO  |                                                                                                                                                                                                                                          |
| 1462 | Heterozygous<br>PS in RH, not<br>shared by DM | PGSC0003DMG40001<br>3568 | PGSC0003DMT4000<br>35313 | chr10 | yes | NO  | GO:0019787; small conjugating protein<br>ligase activity; Molecular Function<br>GO:0043687; post-translational protein<br>modification; Biological Process<br>GO:0051246; regulation of protein<br>metabolic process; Biological Process |
| 1463 | Heterozygous<br>PS in RH, not<br>shared by DM | PGSC0003DMG40001<br>3573 | PGSC0003DMT4000<br>35325 | chr10 | yes | NO  |                                                                                                                                                                                                                                          |
| 1464 | Heterozygous<br>PS in RH, not<br>shared by DM | PGSC0003DMG40001<br>3586 | PGSC0003DMT4000<br>35352 | chr10 | NO  | NO  |                                                                                                                                                                                                                                          |
| 1465 | Heterozygous<br>PS in RH, not<br>shared by DM | PGSC0003DMG40001<br>3608 | PGSC0003DMT4000<br>35406 | chr05 | yes | NO  |                                                                                                                                                                                                                                          |

|      |                                               |                          |                          |       |     |     |                                                                                                                                                                  |
|------|-----------------------------------------------|--------------------------|--------------------------|-------|-----|-----|------------------------------------------------------------------------------------------------------------------------------------------------------------------|
| 1466 | Heterozygous<br>PS in RH, not<br>shared by DM | PGSC0003DMG40001<br>3646 | PGSC0003DMT4000<br>35502 | chr01 | NO  | NO  |                                                                                                                                                                  |
| 1467 | Heterozygous<br>PS in RH, not<br>shared by DM | PGSC0003DMG40001<br>3647 | PGSC0003DMT4000<br>35505 | chr12 | yes | NO  | GO:0004185; serine-type<br>carboxypeptidase activity; Molecular<br>Function GO:0006508; proteolysis;<br>Biological Process                                       |
| 1468 | Heterozygous<br>PS in RH, not<br>shared by DM | PGSC0003DMG40001<br>3673 | PGSC0003DMT4000<br>35558 | chr04 | yes | NO  | GO:0005215; transporter activity;<br>Molecular Function GO:0006857;<br>oligopeptide transport; Biological Process<br>GO:0016020; membrane; Cellular<br>Component |
| 1469 | Heterozygous<br>PS in RH, not<br>shared by DM | PGSC0003DMG40001<br>3693 | PGSC0003DMT4000<br>35605 | chr12 | yes | NO  |                                                                                                                                                                  |
| 1470 | Heterozygous<br>PS in RH, not<br>shared by DM | PGSC0003DMG40001<br>3702 | PGSC0003DMT4000<br>35624 | chr06 | yes | NO  |                                                                                                                                                                  |
| 1471 | Heterozygous<br>PS in RH, not<br>shared by DM | PGSC0003DMG40001<br>3713 | PGSC0003DMT4000<br>35647 | chr04 | NO  | NO  |                                                                                                                                                                  |
| 1472 | Heterozygous<br>PS in RH, not<br>shared by DM | PGSC0003DMG40001<br>3726 | PGSC0003DMT4000<br>35679 | chr12 | NO  | NO  |                                                                                                                                                                  |
| 1473 | Heterozygous<br>PS in RH, not<br>shared by DM | PGSC0003DMG40101<br>3731 | PGSC0003DMT4000<br>35699 | chr09 | NO  | NO  |                                                                                                                                                                  |
| 1474 | Heterozygous<br>PS in RH, not<br>shared by DM | PGSC0003DMG40001<br>3732 | PGSC0003DMT4000<br>35702 | chr06 | yes | yes |                                                                                                                                                                  |
| 1475 | Heterozygous<br>PS in RH, not<br>shared by DM | PGSC0003DMG40001<br>3816 | PGSC0003DMT4000<br>35884 | chr01 | yes | NO  |                                                                                                                                                                  |
| 1476 | Heterozygous<br>PS in RH, not<br>shared by DM | PGSC0003DMG40001<br>3887 | PGSC0003DMT4000<br>36055 | chr12 | NO  | NO  |                                                                                                                                                                  |

|      |                                               |                          |                          |       |     |     |                                                                                                                                                                                                                                                                                                                                      |
|------|-----------------------------------------------|--------------------------|--------------------------|-------|-----|-----|--------------------------------------------------------------------------------------------------------------------------------------------------------------------------------------------------------------------------------------------------------------------------------------------------------------------------------------|
| 1477 | Heterozygous<br>PS in RH, not<br>shared by DM | PGSC0003DMG40001<br>3898 | PGSC0003DMT4000<br>36087 | chr10 | NO  | NO  |                                                                                                                                                                                                                                                                                                                                      |
| 1478 | Heterozygous<br>PS in RH, not<br>shared by DM | PGSC0003DMG40001<br>3904 | PGSC0003DMT4000<br>36104 | chr03 | yes | NO  |                                                                                                                                                                                                                                                                                                                                      |
| 1479 | Heterozygous<br>PS in RH, not<br>shared by DM | PGSC0003DMG40201<br>3921 | PGSC0003DMT4000<br>36154 | chr08 | yes | NO  | GO:0003700; transcription factor activity;<br>Molecular Function GO:0005634;<br>nucleus; Cellular Component<br>GO:0006355; regulation of transcription,<br>DNA-dependent; Biological Process<br>GO:0043565; sequence-specific DNA<br>binding; Molecular Function<br>GO:0046983; protein dimerization<br>activity; Molecular Function |
| 1480 | Heterozygous<br>PS in RH, not<br>shared by DM | PGSC0003DMG40001<br>3929 | PGSC0003DMT4000<br>36189 | chr04 | NO  | NO  |                                                                                                                                                                                                                                                                                                                                      |
| 1481 | Heterozygous<br>PS in RH, not<br>shared by DM | PGSC0003DMG40001<br>3933 | PGSC0003DMT4000<br>36200 | chr08 | yes | NO  |                                                                                                                                                                                                                                                                                                                                      |
| 1482 | Heterozygous<br>PS in RH, not<br>shared by DM | PGSC0003DMG40001<br>3973 | PGSC0003DMT4000<br>36326 | chr01 | yes | NO  | GO:0004497; monooxygenase activity;<br>Molecular Function GO:0005506; iron ion<br>binding; Molecular Function<br>GO:0009055; electron carrier activity;<br>Molecular Function GO:0020037; heme<br>binding; Molecular Function                                                                                                        |
| 1483 | Heterozygous<br>PS in RH, not<br>shared by DM | PGSC0003DMG40001<br>4014 | PGSC0003DMT4000<br>36401 | chr02 | yes | yes | GO:0005524; ATP binding; Molecular<br>Function GO:0006915; apoptosis;<br>Biological Process                                                                                                                                                                                                                                          |
| 1484 | Heterozygous<br>PS in RH, not<br>shared by DM | PGSC0003DMG40001<br>4023 | PGSC0003DMT4000<br>36417 | chr04 | yes | yes | GO:0008171; O-methyltransferase<br>activity; Molecular Function                                                                                                                                                                                                                                                                      |

|      |                                               |                          |                          |       |     |    |                                                                                                                                                                                                                                                |
|------|-----------------------------------------------|--------------------------|--------------------------|-------|-----|----|------------------------------------------------------------------------------------------------------------------------------------------------------------------------------------------------------------------------------------------------|
| 1485 | Heterozygous<br>PS in RH, not<br>shared by DM | PGSC0003DMG40001<br>4094 | PGSC0003DMT4000<br>36566 | chr05 | yes | NO | GO:0003700; transcription factor activity;<br>Molecular Function GO:0043565;<br>sequence-specific DNA binding;<br>Molecular Function GO:0045449;<br>regulation of transcription; Biological<br>Process                                         |
| 1486 | Heterozygous<br>PS in RH, not<br>shared by DM | PGSC0003DMG40101<br>4186 | PGSC0003DMT4000<br>36786 | chr05 | yes | NO |                                                                                                                                                                                                                                                |
| 1487 | Heterozygous<br>PS in RH, not<br>shared by DM | PGSC0003DMG40001<br>4236 | PGSC0003DMT4000<br>36927 | chr06 | NO  | NO |                                                                                                                                                                                                                                                |
| 1488 | Heterozygous<br>PS in RH, not<br>shared by DM | PGSC0003DMG40001<br>4258 | PGSC0003DMT4000<br>36991 | chr03 | yes | NO | GO:0005634; nucleus; Cellular<br>Component GO:0008270; zinc ion<br>binding; Molecular Function<br>GO:0016568; chromatin modification;<br>Biological Process GO:0018024; histone-<br>lysine N-methyltransferase activity;<br>Molecular Function |
| 1489 | Heterozygous<br>PS in RH, not<br>shared by DM | PGSC0003DMG40001<br>4286 | PGSC0003DMT4000<br>37068 | chr02 | NO  | NO |                                                                                                                                                                                                                                                |
| 1490 | Heterozygous<br>PS in RH, not<br>shared by DM | PGSC0003DMG40001<br>4300 | PGSC0003DMT4000<br>37101 | chr10 | NO  | NO |                                                                                                                                                                                                                                                |
| 1491 | Heterozygous<br>PS in RH, not<br>shared by DM | PGSC0003DMG40201<br>4350 | PGSC0003DMT4000<br>37214 | chr05 | NO  | NO |                                                                                                                                                                                                                                                |
| 1492 | Heterozygous<br>PS in RH, not<br>shared by DM | PGSC0003DMG40001<br>4509 | PGSC0003DMT4000<br>37627 | chr07 | NO  | NO |                                                                                                                                                                                                                                                |
| 1493 | Heterozygous<br>PS in RH, not<br>shared by DM | PGSC0003DMG40001<br>4528 | PGSC0003DMT4000<br>37667 | chr04 | NO  | NO |                                                                                                                                                                                                                                                |
| 1494 | Heterozygous<br>PS in RH, not<br>shared by DM | PGSC0003DMG40001<br>4535 | PGSC0003DMT4000<br>37682 | chr06 | NO  | NO |                                                                                                                                                                                                                                                |

|      |                                               |                          |                          |       |     |     |                                                                                                                                                                                                                                                                                                                                                                                                                                                                                                                                                                                                                                                                                                                                                   |
|------|-----------------------------------------------|--------------------------|--------------------------|-------|-----|-----|---------------------------------------------------------------------------------------------------------------------------------------------------------------------------------------------------------------------------------------------------------------------------------------------------------------------------------------------------------------------------------------------------------------------------------------------------------------------------------------------------------------------------------------------------------------------------------------------------------------------------------------------------------------------------------------------------------------------------------------------------|
| 1495 | Heterozygous<br>PS in RH, not<br>shared by DM | PGSC0003DMG40001<br>4711 | PGSC0003DMT4000<br>38147 | chr01 | yes | NO  |                                                                                                                                                                                                                                                                                                                                                                                                                                                                                                                                                                                                                                                                                                                                                   |
| 1496 | Heterozygous<br>PS in RH, not<br>shared by DM | PGSC0003DMG40001<br>4756 | PGSC0003DMT4000<br>38242 | chr09 | NO  | NO  |                                                                                                                                                                                                                                                                                                                                                                                                                                                                                                                                                                                                                                                                                                                                                   |
| 1497 | Heterozygous<br>PS in RH, not<br>shared by DM | PGSC0003DMG40001<br>4776 | PGSC0003DMT4000<br>38291 | chr02 | yes | NO  | GO:0015986; ATP synthesis coupled<br>proton transport; Biological Process<br>GO:0015992; proton transport; Biological<br>Process GO:0016469; proton-transporting<br>two-sector ATPase complex; Cellular<br>Component GO:0016820; hydrolase<br>activity, acting on acid anhydrides,<br>catalyzing transmembrane movement of<br>substances; Molecular Function<br>GO:0033178; proton-transporting two-<br>sector ATPase complex, catalytic domain;<br>Cellular Component GO:0046034; ATP<br>metabolic process; Biological Process<br>GO:0046933; hydrogen ion transporting<br>ATP synthase activity, rotational<br>mechanism; Molecular Function<br>GO:0046961; proton-transporting ATPase<br>activity, rotational mechanism; Molecular<br>Function |
| 1498 | Heterozygous<br>PS in RH, not<br>shared by DM | PGSC0003DMG40001<br>4782 | PGSC0003DMT4000<br>38307 | chr11 | yes | NO  | GO:0016020; membrane; Cellular<br>Component                                                                                                                                                                                                                                                                                                                                                                                                                                                                                                                                                                                                                                                                                                       |
| 1499 | Heterozygous<br>PS in RH, not<br>shared by DM | PGSC0003DMG40101<br>4852 | PGSC0003DMT4000<br>38482 | chr12 | yes | yes |                                                                                                                                                                                                                                                                                                                                                                                                                                                                                                                                                                                                                                                                                                                                                   |
| 1500 | Heterozygous<br>PS in RH, not<br>shared by DM | PGSC0003DMG40001<br>4873 | PGSC0003DMT4000<br>38532 | chr06 | NO  | NO  |                                                                                                                                                                                                                                                                                                                                                                                                                                                                                                                                                                                                                                                                                                                                                   |
| 1501 | Heterozygous<br>PS in RH, not<br>shared by DM | PGSC0003DMG40001<br>4962 | PGSC0003DMT4000<br>38714 | chr09 | NO  | NO  | GO:0016491; oxidoreductase activity;<br>Molecular Function                                                                                                                                                                                                                                                                                                                                                                                                                                                                                                                                                                                                                                                                                        |

|      |                                               |                          |                          |       |     |     |                                                                                                                                                                                                                               |
|------|-----------------------------------------------|--------------------------|--------------------------|-------|-----|-----|-------------------------------------------------------------------------------------------------------------------------------------------------------------------------------------------------------------------------------|
| 1502 | Heterozygous<br>PS in RH, not<br>shared by DM | PGSC0003DMG40001<br>5002 | PGSC0003DMT4000<br>38820 | chr12 | yes | NO  |                                                                                                                                                                                                                               |
| 1503 | Heterozygous<br>PS in RH, not<br>shared by DM | PGSC0003DMG40001<br>5004 | PGSC0003DMT4000<br>38827 | -     | yes | yes |                                                                                                                                                                                                                               |
| 1504 | Heterozygous<br>PS in RH, not<br>shared by DM | PGSC0003DMG40001<br>5053 | PGSC0003DMT4000<br>38923 | chr07 | yes | NO  |                                                                                                                                                                                                                               |
| 1505 | Heterozygous<br>PS in RH, not<br>shared by DM | PGSC0003DMG40001<br>5070 | PGSC0003DMT4000<br>38948 | chr06 | NO  | NO  |                                                                                                                                                                                                                               |
| 1506 | Heterozygous<br>PS in RH, not<br>shared by DM | PGSC0003DMG40001<br>5079 | PGSC0003DMT4000<br>38995 | -     | NO  | NO  |                                                                                                                                                                                                                               |
| 1507 | Heterozygous<br>PS in RH, not<br>shared by DM | PGSC0003DMG40001<br>5087 | PGSC0003DMT4000<br>39029 | chr04 | yes | NO  |                                                                                                                                                                                                                               |
| 1508 | Heterozygous<br>PS in RH, not<br>shared by DM | PGSC0003DMG40001<br>5094 | PGSC0003DMT4000<br>39042 | chr08 | yes | NO  |                                                                                                                                                                                                                               |
| 1509 | Heterozygous<br>PS in RH, not<br>shared by DM | PGSC0003DMG40001<br>5128 | PGSC0003DMT4000<br>39125 | chr03 | yes | NO  |                                                                                                                                                                                                                               |
| 1510 | Heterozygous<br>PS in RH, not<br>shared by DM | PGSC0003DMG40001<br>5231 | PGSC0003DMT4000<br>39387 | chr03 | yes | yes |                                                                                                                                                                                                                               |
| 1511 | Heterozygous<br>PS in RH, not<br>shared by DM | PGSC0003DMG40001<br>5281 | PGSC0003DMT4000<br>39522 | chr01 | yes | yes | GO:0004497; monooxygenase activity;<br>Molecular Function GO:0005506; iron ion<br>binding; Molecular Function<br>GO:0009055; electron carrier activity;<br>Molecular Function GO:0020037; heme<br>binding; Molecular Function |

|      |                                               |                          |                          |       |     |     |                                                                                                                                                                                                                                                                                                                                                                                                      |
|------|-----------------------------------------------|--------------------------|--------------------------|-------|-----|-----|------------------------------------------------------------------------------------------------------------------------------------------------------------------------------------------------------------------------------------------------------------------------------------------------------------------------------------------------------------------------------------------------------|
| 1512 | Heterozygous<br>PS in RH, not<br>shared by DM | PGSC0003DMG40001<br>5283 | PGSC0003DMT4000<br>39527 | chr07 | yes | NO  | GO:0004888; transmembrane receptor<br>activity; Molecular Function<br>GO:0005515; protein binding; Molecular<br>Function GO:0005524; ATP binding;<br>Molecular Function GO:0006915;<br>apoptosis; Biological Process<br>GO:0007165; signal transduction;<br>Biological Process GO:0031224; intrinsic<br>to membrane; Cellular Component<br>GO:0045087; innate immune response;<br>Biological Process |
| 1513 | Heterozygous<br>PS in RH, not<br>shared by DM | PGSC0003DMG40201<br>5329 | PGSC0003DMT4000<br>39638 | -     | yes | yes |                                                                                                                                                                                                                                                                                                                                                                                                      |
| 1514 | Heterozygous<br>PS in RH, not<br>shared by DM | PGSC0003DMG40001<br>5468 | PGSC0003DMT4000<br>39994 |       |     |     |                                                                                                                                                                                                                                                                                                                                                                                                      |
| 1515 | Heterozygous<br>PS in RH, not<br>shared by DM | PGSC0003DMG40001<br>5491 | PGSC0003DMT4000<br>40046 | chr11 | yes | NO  |                                                                                                                                                                                                                                                                                                                                                                                                      |
| 1516 | Heterozygous<br>PS in RH, not<br>shared by DM | PGSC0003DMG40001<br>5503 | PGSC0003DMT4000<br>40075 | chr06 | NO  | NO  | GO:0003993; acid phosphatase activity;<br>Molecular Function                                                                                                                                                                                                                                                                                                                                         |
| 1517 | Heterozygous<br>PS in RH, not<br>shared by DM | PGSC0003DMG40001<br>5642 | PGSC0003DMT4000<br>40393 | chr08 | yes | NO  |                                                                                                                                                                                                                                                                                                                                                                                                      |
| 1518 | Heterozygous<br>PS in RH, not<br>shared by DM | PGSC0003DMG40001<br>5653 | PGSC0003DMT4000<br>40433 | chr12 | NO  | NO  |                                                                                                                                                                                                                                                                                                                                                                                                      |
| 1519 | Heterozygous<br>PS in RH, not<br>shared by DM | PGSC0003DMG40001<br>5660 | PGSC0003DMT4000<br>40449 | chr08 | yes | NO  | GO:0005524; ATP binding; Molecular<br>Function GO:0006915; apoptosis;<br>Biological Process                                                                                                                                                                                                                                                                                                          |
| 1520 | Heterozygous<br>PS in RH, not<br>shared by DM | PGSC0003DMG40001<br>5668 | PGSC0003DMT4000<br>40462 | chr05 | NO  | NO  |                                                                                                                                                                                                                                                                                                                                                                                                      |
| 1521 | Heterozygous<br>PS in RH, not<br>shared by DM | PGSC0003DMG40101<br>5669 | PGSC0003DMT4000<br>40463 | chr06 | yes | yes | GO:0005524; ATP binding; Molecular<br>Function                                                                                                                                                                                                                                                                                                                                                       |

|      |                                               |                          |                          |       |     |     |                                                                                                                                                                                                                                                                          |
|------|-----------------------------------------------|--------------------------|--------------------------|-------|-----|-----|--------------------------------------------------------------------------------------------------------------------------------------------------------------------------------------------------------------------------------------------------------------------------|
| 1522 | Heterozygous<br>PS in RH, not<br>shared by DM | PGSC0003DMG40001<br>5675 | PGSC0003DMT4000<br>40488 | chr08 | yes | NO  |                                                                                                                                                                                                                                                                          |
| 1523 | Heterozygous<br>PS in RH, not<br>shared by DM | PGSC0003DMG40001<br>5705 | PGSC0003DMT4000<br>40616 | chr05 | NO  | NO  | GO:0003700; transcription factor activity;<br>Molecular Function GO:0006355;<br>regulation of transcription, DNA-<br>dependent; Biological Process<br>GO:0043565; sequence-specific DNA<br>binding; Molecular Function<br>GO:0003723; RNA binding; Molecular<br>Function |
| 1524 | Heterozygous<br>PS in RH, not<br>shared by DM | PGSC0003DMG40001<br>5793 | PGSC0003DMT4000<br>40848 | chr03 | yes | yes |                                                                                                                                                                                                                                                                          |
| 1525 | Heterozygous<br>PS in RH, not<br>shared by DM | PGSC0003DMG40001<br>5824 | PGSC0003DMT4000<br>40909 | chr03 | NO  | NO  |                                                                                                                                                                                                                                                                          |
| 1526 | Heterozygous<br>PS in RH, not<br>shared by DM | PGSC0003DMG40001<br>5831 | PGSC0003DMT4000<br>40927 | chr06 | yes | NO  |                                                                                                                                                                                                                                                                          |
| 1527 | Heterozygous<br>PS in RH, not<br>shared by DM | PGSC0003DMG40001<br>5835 | PGSC0003DMT4000<br>40940 | chr04 | yes | yes |                                                                                                                                                                                                                                                                          |
| 1528 | Heterozygous<br>PS in RH, not<br>shared by DM | PGSC0003DMG40001<br>5841 | PGSC0003DMT4000<br>40947 | chr06 | yes | NO  | GO:0003676; nucleic acid binding;<br>Molecular Function GO:0004386; helicase<br>activity; Molecular Function<br>GO:0005524; ATP binding; Molecular<br>Function                                                                                                           |
| 1529 | Heterozygous<br>PS in RH, not<br>shared by DM | PGSC0003DMG40001<br>5852 | PGSC0003DMT4000<br>40974 | chr03 | yes | yes | GO:0005515; protein binding; Molecular<br>Function                                                                                                                                                                                                                       |
| 1530 | Heterozygous<br>PS in RH, not<br>shared by DM | PGSC0003DMG40001<br>5857 | PGSC0003DMT4000<br>40993 | chr05 | yes | yes | GO:0004650; polygalacturonase activity;<br>Molecular Function GO:0005975;<br>carbohydrate metabolic process;<br>Biological Process                                                                                                                                       |
| 1531 | Heterozygous<br>PS in RH, not<br>shared by DM | PGSC0003DMG40101<br>5867 | PGSC0003DMT4000<br>41014 | chr07 | NO  | NO  |                                                                                                                                                                                                                                                                          |



|      |                                               |                          |                          |       |     |     |                                                                                                                                                                                                                                                                                                 |
|------|-----------------------------------------------|--------------------------|--------------------------|-------|-----|-----|-------------------------------------------------------------------------------------------------------------------------------------------------------------------------------------------------------------------------------------------------------------------------------------------------|
| 1532 | Heterozygous<br>PS in RH, not<br>shared by DM | PGSC0003DMG40001<br>5872 | PGSC0003DMT4000<br>41023 | chr04 | yes | NO  |                                                                                                                                                                                                                                                                                                 |
| 1533 | Heterozygous<br>PS in RH, not<br>shared by DM | PGSC0003DMG40101<br>5879 | PGSC0003DMT4000<br>41049 | chr03 | yes | NO  | GO:0004871; signal transducer activity;<br>Molecular Function GO:0009416;<br>response to light stimulus; Biological<br>Process                                                                                                                                                                  |
| 1534 | Heterozygous<br>PS in RH, not<br>shared by DM | PGSC0003DMG40201<br>5879 | PGSC0003DMT4000<br>41052 | chr02 | yes | NO  |                                                                                                                                                                                                                                                                                                 |
| 1535 | Heterozygous<br>PS in RH, not<br>shared by DM | PGSC0003DMG40001<br>5917 | PGSC0003DMT4000<br>41120 | chr01 | yes | yes | GO:0003676; nucleic acid binding;<br>Molecular Function GO:0008270; zinc ion<br>binding; Molecular Function                                                                                                                                                                                     |
| 1536 | Heterozygous<br>PS in RH, not<br>shared by DM | PGSC0003DMG40201<br>5935 | PGSC0003DMT4000<br>41184 | chr11 | NO  | NO  |                                                                                                                                                                                                                                                                                                 |
| 1537 | Heterozygous<br>PS in RH, not<br>shared by DM | PGSC0003DMG40001<br>5955 | PGSC0003DMT4000<br>41222 | chr07 | yes | yes | GO:0004672; protein kinase activity;<br>Molecular Function GO:0005524; ATP<br>binding; Molecular Function<br>GO:0005529; sugar binding; Molecular<br>Function GO:0006468; protein amino acid<br>phosphorylation; Biological Process<br>GO:0048544; recognition of pollen;<br>Biological Process |
| 1538 | Heterozygous<br>PS in RH, not<br>shared by DM | PGSC0003DMG40001<br>5991 | PGSC0003DMT4000<br>41310 | chr02 | yes | NO  |                                                                                                                                                                                                                                                                                                 |
| 1539 | Heterozygous<br>PS in RH, not<br>shared by DM | PGSC0003DMG40001<br>6008 | PGSC0003DMT4000<br>41333 | chr01 | NO  | NO  |                                                                                                                                                                                                                                                                                                 |
| 1540 | Heterozygous<br>PS in RH, not<br>shared by DM | PGSC0003DMG40001<br>6015 | PGSC0003DMT4000<br>41350 | chr04 | yes | yes |                                                                                                                                                                                                                                                                                                 |
| 1541 | Heterozygous<br>PS in RH, not<br>shared by DM | PGSC0003DMG40001<br>6031 | PGSC0003DMT4000<br>41379 | chr04 | yes | yes |                                                                                                                                                                                                                                                                                                 |

|      |                                               |                          |                          |       |     |     |                                                                                                                                                                                                                                                                            |
|------|-----------------------------------------------|--------------------------|--------------------------|-------|-----|-----|----------------------------------------------------------------------------------------------------------------------------------------------------------------------------------------------------------------------------------------------------------------------------|
| 1542 | Heterozygous<br>PS in RH, not<br>shared by DM | PGSC0003DMG40001<br>6035 | PGSC0003DMT4000<br>41383 | chr10 | yes | NO  | GO:0008152; metabolic process;<br>Biological Process GO:0016787;<br>hydrolase activity; Molecular Function                                                                                                                                                                 |
| 1543 | Heterozygous<br>PS in RH, not<br>shared by DM | PGSC0003DMG40101<br>6070 | PGSC0003DMT4000<br>41460 | chr07 | NO  | NO  |                                                                                                                                                                                                                                                                            |
| 1544 | Heterozygous<br>PS in RH, not<br>shared by DM | PGSC0003DMG40001<br>6123 | PGSC0003DMT4000<br>41595 | chr03 | yes | NO  |                                                                                                                                                                                                                                                                            |
| 1545 | Heterozygous<br>PS in RH, not<br>shared by DM | PGSC0003DMG40001<br>6125 | PGSC0003DMT4000<br>41600 | chr05 | yes | NO  | GO:0003700; transcription factor activity;<br>Molecular Function GO:0043565;<br>sequence-specific DNA binding;<br>Molecular Function GO:0045449;<br>regulation of transcription; Biological<br>Process                                                                     |
| 1546 | Heterozygous<br>PS in RH, not<br>shared by DM | PGSC0003DMG40001<br>6132 | PGSC0003DMT4000<br>41615 | chr11 | yes | NO  | GO:0000151; ubiquitin ligase complex;<br>Cellular Component GO:0004842;<br>ubiquitin-protein ligase activity;<br>Molecular Function GO:0016567; protein<br>ubiquitination; Biological Process                                                                              |
| 1547 | Heterozygous<br>PS in RH, not<br>shared by DM | PGSC0003DMG40101<br>6141 | PGSC0003DMT4000<br>41634 | chr06 | yes | NO  |                                                                                                                                                                                                                                                                            |
| 1548 | Heterozygous<br>PS in RH, not<br>shared by DM | PGSC0003DMG40001<br>6156 | PGSC0003DMT4000<br>41670 | chr04 | yes | yes |                                                                                                                                                                                                                                                                            |
| 1549 | Heterozygous<br>PS in RH, not<br>shared by DM | PGSC0003DMG40001<br>6207 | PGSC0003DMT4000<br>41783 | chr12 | yes | NO  | GO:0003700; transcription factor activity;<br>Molecular Function GO:0006355;<br>regulation of transcription, DNA-<br>dependent; Biological Process<br>GO:0008270; zinc ion binding; Molecular<br>Function GO:0043565; sequence-specific<br>DNA binding; Molecular Function |
| 1550 | Heterozygous<br>PS in RH, not<br>shared by DM | PGSC0003DMG40001<br>6263 | PGSC0003DMT4000<br>41926 | chr01 | NO  | NO  | GO:0005515; protein binding; Molecular<br>Function                                                                                                                                                                                                                         |

|      |                                               |                          |                          |       |     |     |                                                                                                                                                                                                                                   |
|------|-----------------------------------------------|--------------------------|--------------------------|-------|-----|-----|-----------------------------------------------------------------------------------------------------------------------------------------------------------------------------------------------------------------------------------|
| 1551 | Heterozygous<br>PS in RH, not<br>shared by DM | PGSC0003DMG40001<br>6276 | PGSC0003DMT4000<br>41960 |       |     |     |                                                                                                                                                                                                                                   |
| 1552 | Heterozygous<br>PS in RH, not<br>shared by DM | PGSC0003DMG40001<br>6287 | PGSC0003DMT4000<br>41989 | chr01 | NO  | NO  |                                                                                                                                                                                                                                   |
| 1553 | Heterozygous<br>PS in RH, not<br>shared by DM | PGSC0003DMG40001<br>6352 | PGSC0003DMT4000<br>42153 | chr03 | NO  | NO  |                                                                                                                                                                                                                                   |
| 1554 | Heterozygous<br>PS in RH, not<br>shared by DM | PGSC0003DMG40001<br>6392 | PGSC0003DMT4000<br>42232 | chr11 | yes | yes |                                                                                                                                                                                                                                   |
| 1555 | Heterozygous<br>PS in RH, not<br>shared by DM | PGSC0003DMG40101<br>6399 | PGSC0003DMT4000<br>42251 | chr03 | yes | NO  | GO:0006457; protein folding; Biological<br>Process GO:0031072; heat shock protein<br>binding; Molecular Function<br>GO:0051082; unfolded protein binding;<br>Molecular Function                                                   |
| 1556 | Heterozygous<br>PS in RH, not<br>shared by DM | PGSC0003DMG40001<br>6410 | PGSC0003DMT4000<br>42324 | chr02 | yes | NO  |                                                                                                                                                                                                                                   |
| 1557 | Heterozygous<br>PS in RH, not<br>shared by DM | PGSC0003DMG40001<br>6418 | PGSC0003DMT4000<br>42347 | chr02 | NO  | NO  | GO:0016747; transferase activity,<br>transferring acyl groups other than amino-<br>acyl groups; Molecular Function                                                                                                                |
| 1558 | Heterozygous<br>PS in RH, not<br>shared by DM | PGSC0003DMG40001<br>6447 | PGSC0003DMT4000<br>42415 | -     | yes | NO  |                                                                                                                                                                                                                                   |
| 1559 | Heterozygous<br>PS in RH, not<br>shared by DM | PGSC0003DMG40001<br>6462 | PGSC0003DMT4000<br>42454 | chr05 | yes | yes | GO:0004857; enzyme inhibitor activity;<br>Molecular Function GO:0005618; cell<br>wall; Cellular Component GO:0030599;<br>pectinesterase activity; Molecular<br>Function GO:0042545; cell wall<br>modification; Biological Process |
| 1560 | Heterozygous<br>PS in RH, not<br>shared by DM | PGSC0003DMG40001<br>6494 | PGSC0003DMT4000<br>42523 | chr12 | NO  | NO  |                                                                                                                                                                                                                                   |
| 1561 | Heterozygous<br>PS in RH, not<br>shared by DM | PGSC0003DMG40001<br>6497 | PGSC0003DMT4000<br>42531 | chr08 | yes | NO  |                                                                                                                                                                                                                                   |

|      |                                               |                          |                          |       |     |     |                                                                                                                                                                                                                    |
|------|-----------------------------------------------|--------------------------|--------------------------|-------|-----|-----|--------------------------------------------------------------------------------------------------------------------------------------------------------------------------------------------------------------------|
| 1562 | Heterozygous<br>PS in RH, not<br>shared by DM | PGSC0003DMG40001<br>6580 | PGSC0003DMT4000<br>42719 | chr10 | NO  | NO  |                                                                                                                                                                                                                    |
| 1563 | Heterozygous<br>PS in RH, not<br>shared by DM | PGSC0003DMG40001<br>6581 | PGSC0003DMT4000<br>42721 | -     | yes | yes |                                                                                                                                                                                                                    |
| 1564 | Heterozygous<br>PS in RH, not<br>shared by DM | PGSC0003DMG40001<br>6616 | PGSC0003DMT4000<br>42825 | chr09 | yes | NO  |                                                                                                                                                                                                                    |
| 1565 | Heterozygous<br>PS in RH, not<br>shared by DM | PGSC0003DMG40101<br>6617 | PGSC0003DMT4000<br>42826 | chr01 | yes | NO  |                                                                                                                                                                                                                    |
| 1566 | Heterozygous<br>PS in RH, not<br>shared by DM | PGSC0003DMG40201<br>6626 | PGSC0003DMT4000<br>42871 | chr04 | yes | NO  | GO:0004867; serine-type endopeptidase<br>inhibitor activity; Molecular Function                                                                                                                                    |
| 1567 | Heterozygous<br>PS in RH, not<br>shared by DM | PGSC0003DMG40001<br>6635 | PGSC0003DMT4000<br>42903 | -     | NO  | NO  |                                                                                                                                                                                                                    |
| 1568 | Heterozygous<br>PS in RH, not<br>shared by DM | PGSC0003DMG40001<br>6644 | PGSC0003DMT4000<br>42928 | -     | yes | NO  |                                                                                                                                                                                                                    |
| 1569 | Heterozygous<br>PS in RH, not<br>shared by DM | PGSC0003DMG40001<br>6653 | PGSC0003DMT4000<br>42949 | chr01 | yes | NO  | GO:0003824; catalytic activity; Molecular<br>Function GO:0008152; metabolic process;<br>Biological Process                                                                                                         |
| 1570 | Heterozygous<br>PS in RH, not<br>shared by DM | PGSC0003DMG40001<br>6741 | PGSC0003DMT4000<br>43143 | chr07 | NO  | NO  |                                                                                                                                                                                                                    |
| 1571 | Heterozygous<br>PS in RH, not<br>shared by DM | PGSC0003DMG40001<br>6742 | PGSC0003DMT4000<br>43146 | chr05 | yes | yes | GO:0004970; ionotropic glutamate<br>receptor activity; Molecular Function<br>GO:0005234; extracellular-glutamate-<br>gated ion channel activity; Molecular<br>Function GO:0016020; membrane;<br>Cellular Component |
| 1572 | Heterozygous<br>PS in RH, not<br>shared by DM | PGSC0003DMG40001<br>6751 | PGSC0003DMT4000<br>43168 |       |     |     |                                                                                                                                                                                                                    |

|      |                                               |                          |                          |       |     |    |                                                                                                                                                                                                                                                                                  |
|------|-----------------------------------------------|--------------------------|--------------------------|-------|-----|----|----------------------------------------------------------------------------------------------------------------------------------------------------------------------------------------------------------------------------------------------------------------------------------|
| 1573 | Heterozygous<br>PS in RH, not<br>shared by DM | PGSC0003DMG40001<br>6754 | PGSC0003DMT4000<br>43177 | chr11 | NO  | NO |                                                                                                                                                                                                                                                                                  |
| 1574 | Heterozygous<br>PS in RH, not<br>shared by DM | PGSC0003DMG40001<br>6808 | PGSC0003DMT4000<br>43301 | -     | NO  | NO |                                                                                                                                                                                                                                                                                  |
| 1575 | Heterozygous<br>PS in RH, not<br>shared by DM | PGSC0003DMG40001<br>6822 | PGSC0003DMT4000<br>43326 | chr10 | yes | NO | GO:0004765; shikimate kinase activity;<br>Molecular Function GO:0005524; ATP<br>binding; Molecular Function                                                                                                                                                                      |
| 1576 | Heterozygous<br>PS in RH, not<br>shared by DM | PGSC0003DMG40001<br>6830 | PGSC0003DMT4000<br>43345 | chr05 | yes | NO | GO:0004252; serine-type endopeptidase<br>activity; Molecular Function<br>GO:0006508; proteolysis; Biological<br>Process GO:0042802; identical protein<br>binding; Molecular Function<br>GO:0043086; negative regulation of<br>catalytic activity; Biological Process             |
| 1577 | Heterozygous<br>PS in RH, not<br>shared by DM | PGSC0003DMG40001<br>6861 | PGSC0003DMT4000<br>43434 | chr11 | NO  | NO |                                                                                                                                                                                                                                                                                  |
| 1578 | Heterozygous<br>PS in RH, not<br>shared by DM | PGSC0003DMG40001<br>6886 | PGSC0003DMT4000<br>43490 | chr10 | yes | NO | GO:0003747; translation release factor<br>activity; Molecular Function<br>GO:0005737; cytoplasm; Cellular<br>Component GO:0006415; translational<br>termination; Biological Process<br>GO:0016149; translation release factor<br>activity, codon specific; Molecular<br>Function |
| 1579 | Heterozygous<br>PS in RH, not<br>shared by DM | PGSC0003DMG40001<br>6900 | PGSC0003DMT4000<br>43528 | chr05 | yes | NO | GO:0005215; transporter activity;<br>Molecular Function GO:0006857;<br>oligopeptide transport; Biological Process<br>GO:0016020; membrane; Cellular<br>Component                                                                                                                 |
| 1580 | Heterozygous<br>PS in RH, not<br>shared by DM | PGSC0003DMG40101<br>6926 | PGSC0003DMT4000<br>43585 | -     | yes | NO |                                                                                                                                                                                                                                                                                  |
| 1581 | Heterozygous<br>PS in RH, not<br>shared by DM | PGSC0003DMG40001<br>6931 | PGSC0003DMT4000<br>43601 | chr12 | yes | NO |                                                                                                                                                                                                                                                                                  |

|      |                                               |                          |                          |       |     |    |                                                                                                                                                                                             |
|------|-----------------------------------------------|--------------------------|--------------------------|-------|-----|----|---------------------------------------------------------------------------------------------------------------------------------------------------------------------------------------------|
| 1582 | Heterozygous<br>PS in RH, not<br>shared by DM | PGSC0003DMG40001<br>6968 | PGSC0003DMT4000<br>43689 | chr01 | yes | NO |                                                                                                                                                                                             |
| 1583 | Heterozygous<br>PS in RH, not<br>shared by DM | PGSC0003DMG40201<br>6979 | PGSC0003DMT4000<br>43719 | chr04 | yes | NO | GO:0008152; metabolic process;<br>Biological Process GO:0016758;<br>transferase activity, transferring hexosyl<br>groups; Molecular Function                                                |
| 1584 | Heterozygous<br>PS in RH, not<br>shared by DM | PGSC0003DMG40301<br>6979 | PGSC0003DMT4000<br>43725 | -     | NO  | NO |                                                                                                                                                                                             |
| 1585 | Heterozygous<br>PS in RH, not<br>shared by DM | PGSC0003DMG40101<br>6981 | PGSC0003DMT4000<br>43731 | chr06 | NO  | NO |                                                                                                                                                                                             |
| 1586 | Heterozygous<br>PS in RH, not<br>shared by DM | PGSC0003DMG40301<br>6981 | PGSC0003DMT4000<br>43733 | chr07 | yes | NO | GO:0004672; protein kinase activity;<br>Molecular Function GO:0005524; ATP<br>binding; Molecular Function<br>GO:0006468; protein amino acid<br>phosphorylation; Biological Process          |
| 1587 | Heterozygous<br>PS in RH, not<br>shared by DM | PGSC0003DMG40001<br>6983 | PGSC0003DMT4000<br>43751 | chr02 | NO  | NO |                                                                                                                                                                                             |
| 1588 | Heterozygous<br>PS in RH, not<br>shared by DM | PGSC0003DMG40001<br>7017 | PGSC0003DMT4000<br>43844 | chr09 | yes | NO | GO:0004713; protein tyrosine kinase<br>activity; Molecular Function<br>GO:0005524; ATP binding; Molecular<br>Function GO:0006468; protein amino acid<br>phosphorylation; Biological Process |
| 1589 | Heterozygous<br>PS in RH, not<br>shared by DM | PGSC0003DMG40001<br>7033 | PGSC0003DMT4000<br>43891 | chr07 | yes | NO | GO:0004672; protein kinase activity;<br>Molecular Function GO:0005524; ATP<br>binding; Molecular Function<br>GO:0006468; protein amino acid<br>phosphorylation; Biological Process          |
| 1590 | Heterozygous<br>PS in RH, not<br>shared by DM | PGSC0003DMG40101<br>7076 | PGSC0003DMT4000<br>43995 | chr06 | yes | NO |                                                                                                                                                                                             |

|      |                                               |                          |                          |       |     |     |                                                                                                                                                                                                                                       |
|------|-----------------------------------------------|--------------------------|--------------------------|-------|-----|-----|---------------------------------------------------------------------------------------------------------------------------------------------------------------------------------------------------------------------------------------|
| 1591 | Heterozygous<br>PS in RH, not<br>shared by DM | PGSC0003DMG40101<br>7077 | PGSC0003DMT4000<br>44015 | chr05 | yes | NO  | GO:0004672; protein kinase activity;<br>Molecular Function GO:0005524; ATP<br>binding; Molecular Function<br>GO:0006468; protein amino acid<br>phosphorylation; Biological Process                                                    |
| 1592 | Heterozygous<br>PS in RH, not<br>shared by DM | PGSC0003DMG40201<br>7077 | PGSC0003DMT4000<br>44014 | chr01 | NO  | NO  | GO:0000151; ubiquitin ligase complex;<br>Cellular Component GO:0004842;<br>ubiquitin-protein ligase activity;<br>Molecular Function GO:0016567; protein<br>ubiquitination; Biological Process                                         |
| 1593 | Heterozygous<br>PS in RH, not<br>shared by DM | PGSC0003DMG40001<br>7111 | PGSC0003DMT4000<br>44099 | chr02 | NO  | NO  |                                                                                                                                                                                                                                       |
| 1594 | Heterozygous<br>PS in RH, not<br>shared by DM | PGSC0003DMG40001<br>7124 | PGSC0003DMT4000<br>44122 | chr04 | yes | NO  |                                                                                                                                                                                                                                       |
| 1595 | Heterozygous<br>PS in RH, not<br>shared by DM | PGSC0003DMG40001<br>7136 | PGSC0003DMT4000<br>44145 | chr11 | yes | NO  | GO:0005515; protein binding; Molecular<br>Function GO:0005524; ATP binding;<br>Molecular Function GO:0006915;<br>apoptosis; Biological Process                                                                                        |
| 1596 | Heterozygous<br>PS in RH, not<br>shared by DM | PGSC0003DMG40001<br>7235 | PGSC0003DMT4000<br>44390 | chr03 | NO  | NO  |                                                                                                                                                                                                                                       |
| 1597 | Heterozygous<br>PS in RH, not<br>shared by DM | PGSC0003DMG40001<br>7243 | PGSC0003DMT4000<br>44425 | chr10 | NO  | NO  |                                                                                                                                                                                                                                       |
| 1598 | Heterozygous<br>PS in RH, not<br>shared by DM | PGSC0003DMG40001<br>7247 | PGSC0003DMT4000<br>44441 | chr04 | yes | yes |                                                                                                                                                                                                                                       |
| 1599 | Heterozygous<br>PS in RH, not<br>shared by DM | PGSC0003DMG40001<br>7300 | PGSC0003DMT4000<br>44564 | chr12 | yes | NO  | GO:0004672; protein kinase activity;<br>Molecular Function GO:0005515; protein<br>binding; Molecular Function<br>GO:0005524; ATP binding; Molecular<br>Function GO:0006468; protein amino acid<br>phosphorylation; Biological Process |

|      |                                               |                          |                          |       |     |    |                                                                                                                                                                                                                                                                                                                                                                                                                                                                                                |
|------|-----------------------------------------------|--------------------------|--------------------------|-------|-----|----|------------------------------------------------------------------------------------------------------------------------------------------------------------------------------------------------------------------------------------------------------------------------------------------------------------------------------------------------------------------------------------------------------------------------------------------------------------------------------------------------|
| 1600 | Heterozygous<br>PS in RH, not<br>shared by DM | PGSC0003DMG40001<br>7315 | PGSC0003DMT4000<br>44608 | chr02 | yes | NO | GO:0005789; endoplasmic reticulum<br>membrane; Cellular Component<br>GO:0006506; GPI anchor biosynthetic<br>process; Biological Process GO:0016740;<br>transferase activity; Molecular Function                                                                                                                                                                                                                                                                                                |
| 1601 | Heterozygous<br>PS in RH, not<br>shared by DM | PGSC0003DMG40001<br>7317 | PGSC0003DMT4000<br>44611 | chr11 | yes | NO | GO:0003824; catalytic activity; Molecular<br>Function GO:0009451; RNA<br>modification; Biological Process<br>GO:0051536; iron-sulfur cluster binding;<br>Molecular Function GO:0051539; 4 iron,<br>4 sulfur cluster binding; Molecular<br>Function                                                                                                                                                                                                                                             |
| 1602 | Heterozygous<br>PS in RH, not<br>shared by DM | PGSC0003DMG40001<br>7318 | PGSC0003DMT4000<br>44620 | -     | yes | NO |                                                                                                                                                                                                                                                                                                                                                                                                                                                                                                |
| 1603 | Heterozygous<br>PS in RH, not<br>shared by DM | PGSC0003DMG40001<br>7321 | PGSC0003DMT4000<br>44650 | chr02 | NO  | NO |                                                                                                                                                                                                                                                                                                                                                                                                                                                                                                |
| 1604 | Heterozygous<br>PS in RH, not<br>shared by DM | PGSC0003DMG40001<br>7322 | PGSC0003DMT4000<br>44652 | chr06 | NO  | NO |                                                                                                                                                                                                                                                                                                                                                                                                                                                                                                |
| 1605 | Heterozygous<br>PS in RH, not<br>shared by DM | PGSC0003DMG40001<br>7327 | PGSC0003DMT4000<br>44668 | chr07 | yes | NO | GO:0005515; protein binding; Molecular<br>Function GO:0005789; endoplasmic<br>reticulum membrane; Cellular Component<br>GO:0006467; protein thiol-disulfide<br>exchange; Biological Process<br>GO:0009055; electron carrier activity;<br>Molecular Function GO:0016671;<br>oxidoreductase activity, acting on sulfur<br>group of donors, disulfide as acceptor;<br>Molecular Function GO:0050660; FAD<br>binding; Molecular Function<br>GO:0055114; oxidation reduction;<br>Biological Process |
| 1606 | Heterozygous<br>PS in RH, not<br>shared by DM | PGSC0003DMG40001<br>7358 | PGSC0003DMT4000<br>44735 | chr09 | yes | NO |                                                                                                                                                                                                                                                                                                                                                                                                                                                                                                |



|      |                                               |                          |                          |       |     |    |                                                                                                                                                                                                                                                                                                          |
|------|-----------------------------------------------|--------------------------|--------------------------|-------|-----|----|----------------------------------------------------------------------------------------------------------------------------------------------------------------------------------------------------------------------------------------------------------------------------------------------------------|
| 1607 | Heterozygous<br>PS in RH, not<br>shared by DM | PGSC0003DMG40001<br>7432 | PGSC0003DMT4000<br>44938 | chr10 | NO  | NO |                                                                                                                                                                                                                                                                                                          |
| 1608 | Heterozygous<br>PS in RH, not<br>shared by DM | PGSC0003DMG40001<br>7444 | PGSC0003DMT4000<br>44981 | chr12 | yes | NO | GO:0004888; transmembrane receptor<br>activity; Molecular Function<br>GO:0007165; signal transduction;<br>Biological Process GO:0031224; intrinsic<br>to membrane; Cellular Component<br>GO:0045087; innate immune response;<br>Biological Process                                                       |
| 1609 | Heterozygous<br>PS in RH, not<br>shared by DM | PGSC0003DMG40001<br>7456 | PGSC0003DMT4000<br>45009 | chr09 | yes | NO |                                                                                                                                                                                                                                                                                                          |
| 1610 | Heterozygous<br>PS in RH, not<br>shared by DM | PGSC0003DMG40101<br>7464 | PGSC0003DMT4000<br>45039 | -     | yes | NO |                                                                                                                                                                                                                                                                                                          |
| 1611 | Heterozygous<br>PS in RH, not<br>shared by DM | PGSC0003DMG40001<br>7466 | PGSC0003DMT4000<br>45052 | chr07 | yes | NO |                                                                                                                                                                                                                                                                                                          |
| 1612 | Heterozygous<br>PS in RH, not<br>shared by DM | PGSC0003DMG40001<br>7527 | PGSC0003DMT4000<br>45189 | chr12 | yes | NO | GO:0005524; ATP binding; Molecular<br>Function GO:0005975; carbohydrate<br>metabolic process; Biological Process<br>GO:0016773; phosphotransferase activity,<br>alcohol group as acceptor; Molecular<br>Function                                                                                         |
| 1613 | Heterozygous<br>PS in RH, not<br>shared by DM | PGSC0003DMG40001<br>7569 | PGSC0003DMT4000<br>45299 | chr02 | yes | NO | GO:0004713; protein tyrosine kinase<br>activity; Molecular Function<br>GO:0005524; ATP binding; Molecular<br>Function GO:0005529; sugar binding;<br>Molecular Function GO:0006468; protein<br>amino acid phosphorylation; Biological<br>Process GO:0048544; recognition of<br>pollen; Biological Process |

|      |                                               |                          |                          |       |     |     |                                                                                                                                                                                                                                                                      |
|------|-----------------------------------------------|--------------------------|--------------------------|-------|-----|-----|----------------------------------------------------------------------------------------------------------------------------------------------------------------------------------------------------------------------------------------------------------------------|
| 1614 | Heterozygous<br>PS in RH, not<br>shared by DM | PGSC0003DMG40001<br>7592 | PGSC0003DMT4000<br>45336 | chr01 | yes | yes | GO:0004252; serine-type endopeptidase<br>activity; Molecular Function<br>GO:0006508; proteolysis; Biological<br>Process GO:0042802; identical protein<br>binding; Molecular Function<br>GO:0043086; negative regulation of<br>catalytic activity; Biological Process |
| 1615 | Heterozygous<br>PS in RH, not<br>shared by DM | PGSC0003DMG40001<br>7600 | PGSC0003DMT4000<br>45355 | chr02 | yes | NO  |                                                                                                                                                                                                                                                                      |
| 1616 | Heterozygous<br>PS in RH, not<br>shared by DM | PGSC0003DMG40001<br>7620 | PGSC0003DMT4000<br>45412 | chr04 | yes | NO  | GO:0004672; protein kinase activity;<br>Molecular Function GO:0005524; ATP<br>binding; Molecular Function<br>GO:0006468; protein amino acid<br>phosphorylation; Biological Process                                                                                   |
| 1617 | Heterozygous<br>PS in RH, not<br>shared by DM | PGSC0003DMG40001<br>7667 | PGSC0003DMT4000<br>45556 | chr10 | yes | yes |                                                                                                                                                                                                                                                                      |
| 1618 | Heterozygous<br>PS in RH, not<br>shared by DM | PGSC0003DMG40001<br>7680 | PGSC0003DMT4000<br>45580 | chr06 | NO  | NO  |                                                                                                                                                                                                                                                                      |
| 1619 | Heterozygous<br>PS in RH, not<br>shared by DM | PGSC0003DMG40001<br>7681 | PGSC0003DMT4000<br>45587 | chr03 | NO  | NO  |                                                                                                                                                                                                                                                                      |
| 1620 | Heterozygous<br>PS in RH, not<br>shared by DM | PGSC0003DMG40001<br>7687 | PGSC0003DMT4000<br>45600 | chr08 | yes | NO  |                                                                                                                                                                                                                                                                      |
| 1621 | Heterozygous<br>PS in RH, not<br>shared by DM | PGSC0003DMG40001<br>7697 | PGSC0003DMT4000<br>45630 | chr04 | NO  | NO  |                                                                                                                                                                                                                                                                      |
| 1622 | Heterozygous<br>PS in RH, not<br>shared by DM | PGSC0003DMG40001<br>7707 | PGSC0003DMT4000<br>45647 | chr06 | NO  | NO  | GO:0005375; copper ion transmembrane<br>transporter activity; Molecular Function<br>GO:0006825; copper ion transport;<br>Biological Process GO:0016021; integral<br>to membrane; Cellular Component                                                                  |
| 1623 | Heterozygous<br>PS in RH, not<br>shared by DM | PGSC0003DMG40001<br>7734 | PGSC0003DMT4000<br>45733 | chr02 | NO  | NO  |                                                                                                                                                                                                                                                                      |

|      |                                               |                          |                          |       |     |     |                                                                                                                                                                                                                                                                                                                                                                                |
|------|-----------------------------------------------|--------------------------|--------------------------|-------|-----|-----|--------------------------------------------------------------------------------------------------------------------------------------------------------------------------------------------------------------------------------------------------------------------------------------------------------------------------------------------------------------------------------|
| 1624 | Heterozygous<br>PS in RH, not<br>shared by DM | PGSC0003DMG40001<br>7739 | PGSC0003DMT4000<br>45745 | chr12 | NO  | NO  |                                                                                                                                                                                                                                                                                                                                                                                |
| 1625 | Heterozygous<br>PS in RH, not<br>shared by DM | PGSC0003DMG40001<br>7749 | PGSC0003DMT4000<br>45769 | chr09 | NO  | NO  |                                                                                                                                                                                                                                                                                                                                                                                |
| 1626 | Heterozygous<br>PS in RH, not<br>shared by DM | PGSC0003DMG40201<br>7754 | PGSC0003DMT4000<br>45787 | chr08 | NO  | NO  |                                                                                                                                                                                                                                                                                                                                                                                |
| 1627 | Heterozygous<br>PS in RH, not<br>shared by DM | PGSC0003DMG40001<br>7777 | PGSC0003DMT4000<br>45835 | chr10 | yes | NO  |                                                                                                                                                                                                                                                                                                                                                                                |
| 1628 | Heterozygous<br>PS in RH, not<br>shared by DM | PGSC0003DMG40001<br>7792 | PGSC0003DMT4000<br>45865 | chr01 | yes | NO  |                                                                                                                                                                                                                                                                                                                                                                                |
| 1629 | Heterozygous<br>PS in RH, not<br>shared by DM | PGSC0003DMG40001<br>7844 | PGSC0003DMT4000<br>45993 | chr10 | yes | NO  | GO:0005524; ATP binding; Molecular<br>Function GO:0006810; transport;<br>Biological Process GO:0016021; integral<br>to membrane; Cellular Component<br>GO:0016887; ATPase activity; Molecular<br>Function GO:0042626; ATPase activity,<br>coupled to transmembrane movement of<br>substances; Molecular Function<br>GO:0055085; transmembrane transport;<br>Biological Process |
| 1630 | Heterozygous<br>PS in RH, not<br>shared by DM | PGSC0003DMG40001<br>7845 | PGSC0003DMT4000<br>45998 | chr02 | yes | yes | GO:0003824; catalytic activity; Molecular<br>Function GO:0044237; cellular metabolic<br>process; Biological Process GO:0050662;<br>coenzyme binding; Molecular Function                                                                                                                                                                                                        |
| 1631 | Heterozygous<br>PS in RH, not<br>shared by DM | PGSC0003DMG40001<br>7850 | PGSC0003DMT4000<br>46008 | chr10 | NO  | NO  | GO:0003676; nucleic acid binding;<br>Molecular Function GO:0004523;<br>ribonuclease H activity; Molecular<br>Function                                                                                                                                                                                                                                                          |
| 1632 | Heterozygous<br>PS in RH, not<br>shared by DM | PGSC0003DMG40001<br>7926 | PGSC0003DMT4000<br>46189 | chr01 | yes | yes |                                                                                                                                                                                                                                                                                                                                                                                |

|      |                                               |                          |                          |       |     |     |                                                                                                            |
|------|-----------------------------------------------|--------------------------|--------------------------|-------|-----|-----|------------------------------------------------------------------------------------------------------------|
| 1633 | Heterozygous<br>PS in RH, not<br>shared by DM | PGSC0003DMG40201<br>7944 | PGSC0003DMT4000<br>46228 | chr07 | NO  | NO  | GO:0016021; integral to membrane;<br>Cellular Component                                                    |
| 1634 | Heterozygous<br>PS in RH, not<br>shared by DM | PGSC0003DMG40001<br>7946 | PGSC0003DMT4000<br>46233 | chr03 | yes | yes | GO:0005634; nucleus; Cellular<br>Component GO:0045449; regulation of<br>transcription; Biological Process  |
| 1635 | Heterozygous<br>PS in RH, not<br>shared by DM | PGSC0003DMG40001<br>7971 | PGSC0003DMT4000<br>46298 | chr09 | yes | NO  |                                                                                                            |
| 1636 | Heterozygous<br>PS in RH, not<br>shared by DM | PGSC0003DMG40001<br>7992 | PGSC0003DMT4000<br>46356 | chr08 | yes | NO  |                                                                                                            |
| 1637 | Heterozygous<br>PS in RH, not<br>shared by DM | PGSC0003DMG40201<br>8005 | PGSC0003DMT4000<br>46387 | chr02 | yes | NO  |                                                                                                            |
| 1638 | Heterozygous<br>PS in RH, not<br>shared by DM | PGSC0003DMG40101<br>8040 | PGSC0003DMT4000<br>46470 | chr06 | NO  | NO  |                                                                                                            |
| 1639 | Heterozygous<br>PS in RH, not<br>shared by DM | PGSC0003DMG40001<br>8050 | PGSC0003DMT4000<br>46505 | chr08 | NO  | NO  |                                                                                                            |
| 1640 | Heterozygous<br>PS in RH, not<br>shared by DM | PGSC0003DMG40001<br>8055 | PGSC0003DMT4000<br>46517 | -     | yes | NO  |                                                                                                            |
| 1641 | Heterozygous<br>PS in RH, not<br>shared by DM | PGSC0003DMG40001<br>8061 | PGSC0003DMT4000<br>46529 | chr08 | yes | NO  |                                                                                                            |
| 1642 | Heterozygous<br>PS in RH, not<br>shared by DM | PGSC0003DMG40001<br>8132 | PGSC0003DMT4000<br>46701 | chr12 | NO  | NO  | GO:0003824; catalytic activity; Molecular<br>Function GO:0008152; metabolic process;<br>Biological Process |
| 1643 | Heterozygous<br>PS in RH, not<br>shared by DM | PGSC0003DMG40001<br>8197 | PGSC0003DMT4000<br>46857 | chr08 | NO  | NO  |                                                                                                            |
| 1644 | Heterozygous<br>PS in RH, not<br>shared by DM | PGSC0003DMG40001<br>8236 | PGSC0003DMT4000<br>46953 | chr06 | yes | yes |                                                                                                            |

|      |                                               |                          |                          |       |     |     |                                                                                                                                                                                              |
|------|-----------------------------------------------|--------------------------|--------------------------|-------|-----|-----|----------------------------------------------------------------------------------------------------------------------------------------------------------------------------------------------|
| 1645 | Heterozygous<br>PS in RH, not<br>shared by DM | PGSC0003DMG40001<br>8253 | PGSC0003DMT4000<br>46993 | chr10 | yes | yes |                                                                                                                                                                                              |
| 1646 | Heterozygous<br>PS in RH, not<br>shared by DM | PGSC0003DMG40001<br>8256 | PGSC0003DMT4000<br>47001 | chr11 | yes | yes | GO:0008270; zinc ion binding; Molecular<br>Function GO:0016491; oxidoreductase<br>activity; Molecular Function GO:0055114;<br>oxidation reduction; Biological Process                        |
| 1647 | Heterozygous<br>PS in RH, not<br>shared by DM | PGSC0003DMG40001<br>8261 | PGSC0003DMT4000<br>47018 | chr09 | yes | yes | GO:0005215; transporter activity;<br>Molecular Function GO:0006810;<br>transport; Biological Process<br>GO:0016020; membrane; Cellular<br>Component                                          |
| 1648 | Heterozygous<br>PS in RH, not<br>shared by DM | PGSC0003DMG40001<br>8269 | PGSC0003DMT4000<br>47047 | chr08 | NO  | NO  | GO:0008060; ARF GTPase activator<br>activity; Molecular Function<br>GO:0008270; zinc ion binding; Molecular<br>Function GO:0032312; regulation of ARF<br>GTPase activity; Biological Process |
| 1649 | Heterozygous<br>PS in RH, not<br>shared by DM | PGSC0003DMG40001<br>8281 | PGSC0003DMT4000<br>47082 | chr10 | yes | yes |                                                                                                                                                                                              |
| 1650 | Heterozygous<br>PS in RH, not<br>shared by DM | PGSC0003DMG40001<br>8337 | PGSC0003DMT4000<br>47231 | chr04 | yes | NO  |                                                                                                                                                                                              |
| 1651 | Heterozygous<br>PS in RH, not<br>shared by DM | PGSC0003DMG40001<br>8367 | PGSC0003DMT4000<br>47295 | chr01 | yes | NO  | GO:0016884; carbon-nitrogen ligase<br>activity, with glutamine as amido-N-<br>donor; Molecular Function                                                                                      |
| 1652 | Heterozygous<br>PS in RH, not<br>shared by DM | PGSC0003DMG40001<br>8473 | PGSC0003DMT4000<br>47533 | chr12 | NO  | NO  |                                                                                                                                                                                              |
| 1653 | Heterozygous<br>PS in RH, not<br>shared by DM | PGSC0003DMG40001<br>8477 | PGSC0003DMT4000<br>47541 | chr05 | yes | NO  | GO:0005524; ATP binding; Molecular<br>Function GO:0006915; apoptosis;<br>Biological Process                                                                                                  |
| 1654 | Heterozygous<br>PS in RH, not<br>shared by DM | PGSC0003DMG40001<br>8491 | PGSC0003DMT4000<br>47580 | chr06 | yes | NO  | GO:0016491; oxidoreductase activity;<br>Molecular Function                                                                                                                                   |

|      |                                         |                          |                          |       |     |     |                                                                                                                                                                                                                |
|------|-----------------------------------------|--------------------------|--------------------------|-------|-----|-----|----------------------------------------------------------------------------------------------------------------------------------------------------------------------------------------------------------------|
| 1655 | Heterozygous PS in RH, not shared by DM | PGSC0003DMG40001<br>8513 | PGSC0003DMT4000<br>47633 | -     | NO  | NO  |                                                                                                                                                                                                                |
| 1656 | Heterozygous PS in RH, not shared by DM | PGSC0003DMG40001<br>8527 | PGSC0003DMT4000<br>47665 | chr09 | yes | NO  |                                                                                                                                                                                                                |
| 1657 | Heterozygous PS in RH, not shared by DM | PGSC0003DMG40001<br>8550 | PGSC0003DMT4000<br>47726 | chr03 | yes | NO  | GO:0004553; hydrolase activity, hydrolyzing O-glycosyl compounds; Molecular Function GO:0005529; sugar binding; Molecular Function GO:0005975; carbohydrate metabolic process; Biological Process              |
| 1658 | Heterozygous PS in RH, not shared by DM | PGSC0003DMG40001<br>8598 | PGSC0003DMT4000<br>47847 | -     | NO  | NO  | GO:0004672; protein kinase activity; Molecular Function GO:0005524; ATP binding; Molecular Function GO:0006468; protein amino acid phosphorylation; Biological Process                                         |
| 1659 | Heterozygous PS in RH, not shared by DM | PGSC0003DMG40101<br>8599 | PGSC0003DMT4000<br>47855 | chr05 | yes | NO  |                                                                                                                                                                                                                |
| 1660 | Heterozygous PS in RH, not shared by DM | PGSC0003DMG40001<br>8612 | PGSC0003DMT4000<br>47882 | chr04 | yes | NO  |                                                                                                                                                                                                                |
| 1661 | Heterozygous PS in RH, not shared by DM | PGSC0003DMG40001<br>8619 | PGSC0003DMT4000<br>47907 | chr04 | yes | yes | GO:0003824; catalytic activity; Molecular Function GO:0006464; protein modification process; Biological Process                                                                                                |
| 1662 | Heterozygous PS in RH, not shared by DM | PGSC0003DMG40001<br>8629 | PGSC0003DMT4000<br>47926 | -     | yes | NO  | GO:0004497; monooxygenase activity; Molecular Function GO:0005506; iron ion binding; Molecular Function GO:0009055; electron carrier activity; Molecular Function GO:0020037; heme binding; Molecular Function |
| 1663 | Heterozygous PS in RH, not shared by DM | PGSC0003DMG40101<br>8705 | PGSC0003DMT4000<br>48139 | chr12 | NO  | NO  |                                                                                                                                                                                                                |

|      |                                               |                          |                          |       |     |     |                                                                                                          |
|------|-----------------------------------------------|--------------------------|--------------------------|-------|-----|-----|----------------------------------------------------------------------------------------------------------|
| 1664 | Heterozygous<br>PS in RH, not<br>shared by DM | PGSC0003DMG40001<br>8727 | PGSC0003DMT4000<br>48208 | chr12 | yes | NO  |                                                                                                          |
| 1665 | Heterozygous<br>PS in RH, not<br>shared by DM | PGSC0003DMG40001<br>8731 | PGSC0003DMT4000<br>48219 | chr10 | NO  | NO  |                                                                                                          |
| 1666 | Heterozygous<br>PS in RH, not<br>shared by DM | PGSC0003DMG40001<br>8733 | PGSC0003DMT4000<br>48223 | chr08 | yes | NO  | GO:0003913; DNA photolyase activity;<br>Molecular Function GO:0006281; DNA<br>repair; Biological Process |
| 1667 | Heterozygous<br>PS in RH, not<br>shared by DM | PGSC0003DMG40201<br>8748 | PGSC0003DMT4000<br>48258 | chr09 | yes | yes |                                                                                                          |
| 1668 | Heterozygous<br>PS in RH, not<br>shared by DM | PGSC0003DMG40001<br>8756 | PGSC0003DMT4000<br>48275 | chr08 | yes | NO  |                                                                                                          |
| 1669 | Heterozygous<br>PS in RH, not<br>shared by DM | PGSC0003DMG40001<br>8779 | PGSC0003DMT4000<br>48331 | -     | NO  | NO  |                                                                                                          |
| 1670 | Heterozygous<br>PS in RH, not<br>shared by DM | PGSC0003DMG40001<br>8780 | PGSC0003DMT4000<br>48335 | chr02 | NO  | NO  |                                                                                                          |
| 1671 | Heterozygous<br>PS in RH, not<br>shared by DM | PGSC0003DMG40001<br>8866 | PGSC0003DMT4000<br>48565 | chr12 | NO  | NO  |                                                                                                          |
| 1672 | Heterozygous<br>PS in RH, not<br>shared by DM | PGSC0003DMG40001<br>8888 | PGSC0003DMT4000<br>48615 | chr02 | NO  | NO  |                                                                                                          |
| 1673 | Heterozygous<br>PS in RH, not<br>shared by DM | PGSC0003DMG40001<br>9019 | PGSC0003DMT4000<br>48945 | chr04 | NO  | NO  |                                                                                                          |
| 1674 | Heterozygous<br>PS in RH, not<br>shared by DM | PGSC0003DMG40001<br>9084 | PGSC0003DMT4000<br>49098 | chr12 | NO  | NO  |                                                                                                          |

|      |                                               |                          |                          |       |     |     |                                                                                                                                                                                                                               |
|------|-----------------------------------------------|--------------------------|--------------------------|-------|-----|-----|-------------------------------------------------------------------------------------------------------------------------------------------------------------------------------------------------------------------------------|
| 1675 | Heterozygous<br>PS in RH, not<br>shared by DM | PGSC0003DMG40001<br>9141 | PGSC0003DMT4000<br>49234 | chr08 | NO  | NO  | GO:0004497; monooxygenase activity;<br>Molecular Function GO:0005506; iron ion<br>binding; Molecular Function<br>GO:0009055; electron carrier activity;<br>Molecular Function GO:0020037; heme<br>binding; Molecular Function |
| 1676 | Heterozygous<br>PS in RH, not<br>shared by DM | PGSC0003DMG40001<br>9145 | PGSC0003DMT4000<br>49243 | chr11 | NO  | NO  |                                                                                                                                                                                                                               |
| 1677 | Heterozygous<br>PS in RH, not<br>shared by DM | PGSC0003DMG40001<br>9146 | PGSC0003DMT4000<br>49246 | -     | yes | NO  | GO:0016021; integral to membrane;<br>Cellular Component                                                                                                                                                                       |
| 1678 | Heterozygous<br>PS in RH, not<br>shared by DM | PGSC0003DMG40001<br>9158 | PGSC0003DMT4000<br>49292 | chr07 | yes | yes |                                                                                                                                                                                                                               |
| 1679 | Heterozygous<br>PS in RH, not<br>shared by DM | PGSC0003DMG40201<br>9176 | PGSC0003DMT4000<br>49361 | chr10 | yes | NO  |                                                                                                                                                                                                                               |
| 1680 | Heterozygous<br>PS in RH, not<br>shared by DM | PGSC0003DMG40001<br>9210 | PGSC0003DMT4000<br>49445 | chr03 | NO  | NO  |                                                                                                                                                                                                                               |
| 1681 | Heterozygous<br>PS in RH, not<br>shared by DM | PGSC0003DMG40001<br>9221 | PGSC0003DMT4000<br>49465 | chr01 | yes | yes | GO:0005515; protein binding; Molecular<br>Function                                                                                                                                                                            |
| 1682 | Heterozygous<br>PS in RH, not<br>shared by DM | PGSC0003DMG40201<br>9226 | PGSC0003DMT4000<br>49482 | chr09 | NO  | NO  |                                                                                                                                                                                                                               |
| 1683 | Heterozygous<br>PS in RH, not<br>shared by DM | PGSC0003DMG40001<br>9234 | PGSC0003DMT4000<br>49496 | chr09 | NO  | NO  | GO:0008219; cell death; Biological<br>Process GO:0016021; integral to<br>membrane; Cellular Component                                                                                                                         |
| 1684 | Heterozygous<br>PS in RH, not<br>shared by DM | PGSC0003DMG40001<br>9237 | PGSC0003DMT4000<br>49507 | chr04 | NO  | NO  |                                                                                                                                                                                                                               |
| 1685 | Heterozygous<br>PS in RH, not<br>shared by DM | PGSC0003DMG40001<br>9312 | PGSC0003DMT4000<br>49701 | chr11 | NO  | NO  |                                                                                                                                                                                                                               |



|      |                                               |                          |                          |       |     |     |                                                                                                                                                                                                                               |
|------|-----------------------------------------------|--------------------------|--------------------------|-------|-----|-----|-------------------------------------------------------------------------------------------------------------------------------------------------------------------------------------------------------------------------------|
| 1686 | Heterozygous<br>PS in RH, not<br>shared by DM | PGSC0003DMG40001<br>9367 | PGSC0003DMT4000<br>49845 | chr09 | yes | NO  | GO:0004497; monooxygenase activity;<br>Molecular Function GO:0005506; iron ion<br>binding; Molecular Function<br>GO:0009055; electron carrier activity;<br>Molecular Function GO:0020037; heme<br>binding; Molecular Function |
| 1687 | Heterozygous<br>PS in RH, not<br>shared by DM | PGSC0003DMG40001<br>9372 | PGSC0003DMT4000<br>49859 | chr10 | yes | NO  |                                                                                                                                                                                                                               |
| 1688 | Heterozygous<br>PS in RH, not<br>shared by DM | PGSC0003DMG40001<br>9373 | PGSC0003DMT4000<br>49861 | chr04 | yes | yes |                                                                                                                                                                                                                               |
| 1689 | Heterozygous<br>PS in RH, not<br>shared by DM | PGSC0003DMG40001<br>9381 | PGSC0003DMT4000<br>49877 | chr09 | NO  | NO  |                                                                                                                                                                                                                               |
| 1690 | Heterozygous<br>PS in RH, not<br>shared by DM | PGSC0003DMG40001<br>9544 | PGSC0003DMT4000<br>50302 | chr12 | yes | NO  | GO:0005515; protein binding; Molecular<br>Function                                                                                                                                                                            |
| 1691 | Heterozygous<br>PS in RH, not<br>shared by DM | PGSC0003DMG40001<br>9553 | PGSC0003DMT4000<br>50321 | chr06 | NO  | NO  |                                                                                                                                                                                                                               |
| 1692 | Heterozygous<br>PS in RH, not<br>shared by DM | PGSC0003DMG40001<br>9580 | PGSC0003DMT4000<br>50373 | -     | NO  | NO  |                                                                                                                                                                                                                               |
| 1693 | Heterozygous<br>PS in RH, not<br>shared by DM | PGSC0003DMG40201<br>9589 | PGSC0003DMT4000<br>50399 | chr10 | NO  | NO  | GO:0003676; nucleic acid binding;<br>Molecular Function GO:0003723; RNA<br>binding; Molecular Function                                                                                                                        |
| 1694 | Heterozygous<br>PS in RH, not<br>shared by DM | PGSC0003DMG40101<br>9602 | PGSC0003DMT4000<br>50432 | chr03 | NO  | NO  | GO:0005524; ATP binding; Molecular<br>Function                                                                                                                                                                                |
| 1695 | Heterozygous<br>PS in RH, not<br>shared by DM | PGSC0003DMG40101<br>9640 | PGSC0003DMT4000<br>50540 | chr03 | yes | NO  |                                                                                                                                                                                                                               |
| 1696 | Heterozygous<br>PS in RH, not<br>shared by DM | PGSC0003DMG40001<br>9644 | PGSC0003DMT4000<br>50551 | chr10 | NO  | NO  |                                                                                                                                                                                                                               |

|      |                                               |                          |                          |       |     |     |                                                                                                                                                                                                        |
|------|-----------------------------------------------|--------------------------|--------------------------|-------|-----|-----|--------------------------------------------------------------------------------------------------------------------------------------------------------------------------------------------------------|
| 1697 | Heterozygous<br>PS in RH, not<br>shared by DM | PGSC0003DMG40001<br>9657 | PGSC0003DMT4000<br>50580 | chr11 | NO  | NO  |                                                                                                                                                                                                        |
| 1698 | Heterozygous<br>PS in RH, not<br>shared by DM | PGSC0003DMG40101<br>9682 | PGSC0003DMT4000<br>50678 | chr04 | NO  | NO  | GO:0003700; transcription factor activity;<br>Molecular Function GO:0043565;<br>sequence-specific DNA binding;<br>Molecular Function GO:0045449;<br>regulation of transcription; Biological<br>Process |
| 1699 | Heterozygous<br>PS in RH, not<br>shared by DM | PGSC0003DMG40001<br>9711 | PGSC0003DMT4000<br>50750 | -     | yes | yes |                                                                                                                                                                                                        |
| 1700 | Heterozygous<br>PS in RH, not<br>shared by DM | PGSC0003DMG40101<br>9736 | PGSC0003DMT4000<br>50813 | chr09 | yes | NO  | GO:0000287; magnesium ion binding;<br>Molecular Function GO:0008152;<br>metabolic process; Biological Process<br>GO:0016829; lyase activity; Molecular<br>Function                                     |
| 1701 | Heterozygous<br>PS in RH, not<br>shared by DM | PGSC0003DMG40001<br>9844 | PGSC0003DMT4000<br>51098 | chr04 | NO  | NO  |                                                                                                                                                                                                        |
| 1702 | Heterozygous<br>PS in RH, not<br>shared by DM | PGSC0003DMG40001<br>9912 | PGSC0003DMT4000<br>51268 | -     | NO  | NO  |                                                                                                                                                                                                        |
| 1703 | Heterozygous<br>PS in RH, not<br>shared by DM | PGSC0003DMG40001<br>9997 | PGSC0003DMT4000<br>51479 | chr03 | NO  | NO  |                                                                                                                                                                                                        |
| 1704 | Heterozygous<br>PS in RH, not<br>shared by DM | PGSC0003DMG40002<br>0023 | PGSC0003DMT4000<br>51546 | -     | NO  | NO  |                                                                                                                                                                                                        |
| 1705 | Heterozygous<br>PS in RH, not<br>shared by DM | PGSC0003DMG40002<br>0050 | PGSC0003DMT4000<br>51632 | chr12 | NO  | NO  |                                                                                                                                                                                                        |

|      |                                               |                          |                          |       |     |     |                                                                                                                                                                                                                                       |
|------|-----------------------------------------------|--------------------------|--------------------------|-------|-----|-----|---------------------------------------------------------------------------------------------------------------------------------------------------------------------------------------------------------------------------------------|
| 1706 | Heterozygous<br>PS in RH, not<br>shared by DM | PGSC0003DMG40002<br>0074 | PGSC0003DMT4000<br>51692 | chr03 | NO  | NO  | GO:0005215; transporter activity;<br>Molecular Function GO:0006810;<br>transport; Biological Process<br>GO:0016021; integral to membrane;<br>Cellular Component GO:0055085;<br>transmembrane transport; Biological<br>Process         |
| 1707 | Heterozygous<br>PS in RH, not<br>shared by DM | PGSC0003DMG40202<br>0085 | PGSC0003DMT4000<br>51740 | chr03 | NO  | NO  |                                                                                                                                                                                                                                       |
| 1708 | Heterozygous<br>PS in RH, not<br>shared by DM | PGSC0003DMG40102<br>0115 | PGSC0003DMT4000<br>51829 | chr04 | yes | yes |                                                                                                                                                                                                                                       |
| 1709 | Heterozygous<br>PS in RH, not<br>shared by DM | PGSC0003DMG40002<br>0220 | PGSC0003DMT4000<br>52092 | chr04 | yes | NO  | GO:0004672; protein kinase activity;<br>Molecular Function GO:0005515; protein<br>binding; Molecular Function<br>GO:0005524; ATP binding; Molecular<br>Function GO:0006468; protein amino acid<br>phosphorylation; Biological Process |
| 1710 | Heterozygous<br>PS in RH, not<br>shared by DM | PGSC0003DMG40102<br>0221 | PGSC0003DMT4000<br>52097 | chr12 | NO  | NO  |                                                                                                                                                                                                                                       |
| 1711 | Heterozygous<br>PS in RH, not<br>shared by DM | PGSC0003DMG40102<br>0229 | PGSC0003DMT4000<br>52119 | chr04 | yes | NO  | GO:0005515; protein binding; Molecular<br>Function                                                                                                                                                                                    |
| 1712 | Heterozygous<br>PS in RH, not<br>shared by DM | PGSC0003DMG40302<br>0229 | PGSC0003DMT4000<br>52131 | chr10 | NO  | NO  |                                                                                                                                                                                                                                       |
| 1713 | Heterozygous<br>PS in RH, not<br>shared by DM | PGSC0003DMG40002<br>0359 | PGSC0003DMT4000<br>52453 | chr08 | yes | yes | GO:0008152; metabolic process;<br>Biological Process GO:0008415;<br>acyltransferase activity; Molecular<br>Function                                                                                                                   |
| 1714 | Heterozygous<br>PS in RH, not<br>shared by DM | PGSC0003DMG40002<br>0360 | PGSC0003DMT4000<br>52458 | chr02 | yes | NO  |                                                                                                                                                                                                                                       |
| 1715 | Heterozygous<br>PS in RH, not<br>shared by DM | PGSC0003DMG40002<br>0365 | PGSC0003DMT4000<br>52472 | chr03 | yes | yes | GO:0046907; intracellular transport;<br>Biological Process                                                                                                                                                                            |

|      |                                               |                          |                          |       |     |     |                                                                                                                                                                                    |
|------|-----------------------------------------------|--------------------------|--------------------------|-------|-----|-----|------------------------------------------------------------------------------------------------------------------------------------------------------------------------------------|
| 1716 | Heterozygous<br>PS in RH, not<br>shared by DM | PGSC0003DMG40002<br>0372 | PGSC0003DMT4000<br>52492 | chr01 | NO  | NO  |                                                                                                                                                                                    |
| 1717 | Heterozygous<br>PS in RH, not<br>shared by DM | PGSC0003DMG40002<br>0391 | PGSC0003DMT4000<br>52553 | chr01 | yes | NO  | GO:0004672; protein kinase activity;<br>Molecular Function GO:0005524; ATP<br>binding; Molecular Function<br>GO:0006468; protein amino acid<br>phosphorylation; Biological Process |
| 1718 | Heterozygous<br>PS in RH, not<br>shared by DM | PGSC0003DMG40002<br>0418 | PGSC0003DMT4000<br>52600 | -     | yes | NO  |                                                                                                                                                                                    |
| 1719 | Heterozygous<br>PS in RH, not<br>shared by DM | PGSC0003DMG40002<br>0424 | PGSC0003DMT4000<br>52613 | chr08 | yes | NO  | GO:0008152; metabolic process;<br>Biological Process GO:0016491;<br>oxidoreductase activity; Molecular<br>Function                                                                 |
| 1720 | Heterozygous<br>PS in RH, not<br>shared by DM | PGSC0003DMG40002<br>0426 | PGSC0003DMT4000<br>52621 | chr04 | NO  | NO  |                                                                                                                                                                                    |
| 1721 | Heterozygous<br>PS in RH, not<br>shared by DM | PGSC0003DMG40002<br>0428 | PGSC0003DMT4000<br>52626 | chr06 | NO  | NO  | GO:0005778; peroxisomal membrane;<br>Cellular Component GO:0007031;<br>peroxisome organization; Biological<br>Process                                                              |
| 1722 | Heterozygous<br>PS in RH, not<br>shared by DM | PGSC0003DMG40002<br>0435 | PGSC0003DMT4000<br>52645 | chr01 | NO  | NO  |                                                                                                                                                                                    |
| 1723 | Heterozygous<br>PS in RH, not<br>shared by DM | PGSC0003DMG40102<br>0444 | PGSC0003DMT4000<br>52663 | -     | yes | yes |                                                                                                                                                                                    |
| 1724 | Heterozygous<br>PS in RH, not<br>shared by DM | PGSC0003DMG40002<br>0467 | PGSC0003DMT4000<br>52739 | chr06 | yes | NO  | GO:0006629; lipid metabolic process;<br>Biological Process GO:0016788;<br>hydrolase activity, acting on ester bonds;<br>Molecular Function                                         |
| 1725 | Heterozygous<br>PS in RH, not<br>shared by DM | PGSC0003DMG40002<br>0578 | PGSC0003DMT4000<br>53021 | chr04 | yes | NO  | GO:0004807; triose-phosphate isomerase<br>activity; Molecular Function<br>GO:0008152; metabolic process;<br>Biological Process                                                     |

|      |                                               |                          |                          |       |     |    |                                                                                                                                                                                                                                         |
|------|-----------------------------------------------|--------------------------|--------------------------|-------|-----|----|-----------------------------------------------------------------------------------------------------------------------------------------------------------------------------------------------------------------------------------------|
| 1726 | Heterozygous<br>PS in RH, not<br>shared by DM | PGSC0003DMG40102<br>0596 | PGSC0003DMT4000<br>53095 | chr03 | yes | NO | GO:0005634; nucleus; Cellular<br>Component GO:0008270; zinc ion<br>binding; Molecular Function<br>GO:0030528; transcription regulator<br>activity; Molecular Function<br>GO:0045449; regulation of transcription;<br>Biological Process |
| 1727 | Heterozygous<br>PS in RH, not<br>shared by DM | PGSC0003DMG40002<br>0646 | PGSC0003DMT4000<br>53192 | chr05 | NO  | NO |                                                                                                                                                                                                                                         |
| 1728 | Heterozygous<br>PS in RH, not<br>shared by DM | PGSC0003DMG40002<br>0671 | PGSC0003DMT4000<br>53258 | chr04 | NO  | NO |                                                                                                                                                                                                                                         |
| 1729 | Heterozygous<br>PS in RH, not<br>shared by DM | PGSC0003DMG40002<br>0680 | PGSC0003DMT4000<br>53285 | -     | NO  | NO |                                                                                                                                                                                                                                         |
| 1730 | Heterozygous<br>PS in RH, not<br>shared by DM | PGSC0003DMG40002<br>0690 | PGSC0003DMT4000<br>53311 | chr05 | yes | NO | GO:0005524; ATP binding; Molecular<br>Function GO:0006915; apoptosis;<br>Biological Process                                                                                                                                             |
| 1731 | Heterozygous<br>PS in RH, not<br>shared by DM | PGSC0003DMG40202<br>0702 | PGSC0003DMT4000<br>53351 | chr04 | yes | NO | GO:0005515; protein binding; Molecular<br>Function                                                                                                                                                                                      |
| 1732 | Heterozygous<br>PS in RH, not<br>shared by DM | PGSC0003DMG40002<br>0759 | PGSC0003DMT4000<br>53517 | chr12 | NO  | NO |                                                                                                                                                                                                                                         |
| 1733 | Heterozygous<br>PS in RH, not<br>shared by DM | PGSC0003DMG40002<br>0791 | PGSC0003DMT4000<br>53593 | chr06 | yes | NO |                                                                                                                                                                                                                                         |
| 1734 | Heterozygous<br>PS in RH, not<br>shared by DM | PGSC0003DMG40002<br>0851 | PGSC0003DMT4000<br>53754 | chr10 | NO  | NO |                                                                                                                                                                                                                                         |
| 1735 | Heterozygous<br>PS in RH, not<br>shared by DM | PGSC0003DMG40002<br>0880 | PGSC0003DMT4000<br>53830 | chr11 | NO  | NO |                                                                                                                                                                                                                                         |
| 1736 | Heterozygous<br>PS in RH, not<br>shared by DM | PGSC0003DMG40002<br>0917 | PGSC0003DMT4000<br>53916 | chr03 | yes | NO |                                                                                                                                                                                                                                         |

|      |                                               |                          |                          |       |     |     |                                                                                                                                                                                                                                                                                                                                                                                           |
|------|-----------------------------------------------|--------------------------|--------------------------|-------|-----|-----|-------------------------------------------------------------------------------------------------------------------------------------------------------------------------------------------------------------------------------------------------------------------------------------------------------------------------------------------------------------------------------------------|
| 1737 | Heterozygous<br>PS in RH, not<br>shared by DM | PGSC0003DMG40002<br>0925 | PGSC0003DMT4000<br>53934 | chr08 | NO  | NO  | GO:0003676; nucleic acid binding;<br>Molecular Function                                                                                                                                                                                                                                                                                                                                   |
| 1738 | Heterozygous<br>PS in RH, not<br>shared by DM | PGSC0003DMG40002<br>0956 | PGSC0003DMT4000<br>54011 | chr04 | NO  | NO  | GO:0006508; proteolysis; Biological<br>Process GO:0008234; cysteine-type<br>peptidase activity; Molecular Function                                                                                                                                                                                                                                                                        |
| 1739 | Heterozygous<br>PS in RH, not<br>shared by DM | PGSC0003DMG40002<br>0968 | PGSC0003DMT4000<br>54066 | chr01 | yes | yes | GO:0003676; nucleic acid binding;<br>Molecular Function                                                                                                                                                                                                                                                                                                                                   |
| 1740 | Heterozygous<br>PS in RH, not<br>shared by DM | PGSC0003DMG40002<br>0989 | PGSC0003DMT4000<br>54119 | -     | NO  | NO  |                                                                                                                                                                                                                                                                                                                                                                                           |
| 1741 | Heterozygous<br>PS in RH, not<br>shared by DM | PGSC0003DMG40102<br>1049 | PGSC0003DMT4000<br>54259 | chr04 | NO  | NO  |                                                                                                                                                                                                                                                                                                                                                                                           |
| 1742 | Heterozygous<br>PS in RH, not<br>shared by DM | PGSC0003DMG40002<br>1072 | PGSC0003DMT4000<br>54304 | -     | yes | NO  | GO:0008415; acyltransferase activity;<br>Molecular Function GO:0009058;<br>biosynthetic process; Biological Process                                                                                                                                                                                                                                                                       |
| 1743 | Heterozygous<br>PS in RH, not<br>shared by DM | PGSC0003DMG40002<br>1074 | PGSC0003DMT4000<br>54308 | chr06 | yes | NO  |                                                                                                                                                                                                                                                                                                                                                                                           |
| 1744 | Heterozygous<br>PS in RH, not<br>shared by DM | PGSC0003DMG40002<br>1087 | PGSC0003DMT4000<br>54334 | chr10 | yes | NO  | GO:0004175; endopeptidase activity;<br>Molecular Function GO:0004298;<br>threonine-type endopeptidase activity;<br>Molecular Function GO:0005839;<br>proteasome core complex; Cellular<br>Component GO:0006511; ubiquitin-<br>dependent protein catabolic process;<br>Biological Process GO:0051603;<br>proteolysis involved in cellular protein<br>catabolic process; Biological Process |
| 1745 | Heterozygous<br>PS in RH, not<br>shared by DM | PGSC0003DMG40002<br>1118 | PGSC0003DMT4000<br>54405 | chr01 | yes | NO  | GO:0004497; monooxygenase activity;<br>Molecular Function GO:0005506; iron ion<br>binding; Molecular Function<br>GO:0009055; electron carrier activity;<br>Molecular Function GO:0020037; heme<br>binding; Molecular Function                                                                                                                                                             |

|      |                                               |                          |                          |       |     |    |                                                                                                                                                                                    |
|------|-----------------------------------------------|--------------------------|--------------------------|-------|-----|----|------------------------------------------------------------------------------------------------------------------------------------------------------------------------------------|
| 1746 | Heterozygous<br>PS in RH, not<br>shared by DM | PGSC0003DMG40002<br>1144 | PGSC0003DMT4000<br>54480 | chr04 | NO  | NO |                                                                                                                                                                                    |
| 1747 | Heterozygous<br>PS in RH, not<br>shared by DM | PGSC0003DMG40202<br>1183 | PGSC0003DMT4000<br>54593 | chr07 | yes | NO |                                                                                                                                                                                    |
| 1748 | Heterozygous<br>PS in RH, not<br>shared by DM | PGSC0003DMG40002<br>1194 | PGSC0003DMT4000<br>54613 | chr12 | NO  | NO |                                                                                                                                                                                    |
| 1749 | Heterozygous<br>PS in RH, not<br>shared by DM | PGSC0003DMG40002<br>1203 | PGSC0003DMT4000<br>54636 | chr12 | NO  | NO | GO:0042256; mature ribosome assembly;<br>Biological Process GO:0043022;<br>ribosome binding; Molecular Function                                                                    |
| 1750 | Heterozygous<br>PS in RH, not<br>shared by DM | PGSC0003DMG40002<br>1212 | PGSC0003DMT4000<br>54667 | chr09 | NO  | NO |                                                                                                                                                                                    |
| 1751 | Heterozygous<br>PS in RH, not<br>shared by DM | PGSC0003DMG40002<br>1241 | PGSC0003DMT4000<br>54712 | chr06 | yes | NO | GO:0005634; nucleus; Cellular<br>Component                                                                                                                                         |
| 1752 | Heterozygous<br>PS in RH, not<br>shared by DM | PGSC0003DMG40002<br>1262 | PGSC0003DMT4000<br>54786 | -     | yes | NO | GO:0004672; protein kinase activity;<br>Molecular Function GO:0005524; ATP<br>binding; Molecular Function<br>GO:0006468; protein amino acid<br>phosphorylation; Biological Process |
| 1753 | Heterozygous<br>PS in RH, not<br>shared by DM | PGSC0003DMG40002<br>1339 | PGSC0003DMT4000<br>54985 | chr02 | yes | NO |                                                                                                                                                                                    |
| 1754 | Heterozygous<br>PS in RH, not<br>shared by DM | PGSC0003DMG40002<br>1355 | PGSC0003DMT4000<br>55044 | chr12 | yes | NO |                                                                                                                                                                                    |
| 1755 | Heterozygous<br>PS in RH, not<br>shared by DM | PGSC0003DMG40002<br>1405 | PGSC0003DMT4000<br>55155 | chr02 | NO  | NO |                                                                                                                                                                                    |
| 1756 | Heterozygous<br>PS in RH, not<br>shared by DM | PGSC0003DMG40002<br>1472 | PGSC0003DMT4000<br>55319 | chr09 | NO  | NO |                                                                                                                                                                                    |

|      |                                               |                          |                          |       |     |     |                                                                                                                                                                         |
|------|-----------------------------------------------|--------------------------|--------------------------|-------|-----|-----|-------------------------------------------------------------------------------------------------------------------------------------------------------------------------|
| 1757 | Heterozygous<br>PS in RH, not<br>shared by DM | PGSC0003DMG40102<br>1491 | PGSC0003DMT4000<br>55353 | chr02 | yes | yes | GO:0008270; zinc ion binding; Molecular<br>Function                                                                                                                     |
| 1758 | Heterozygous<br>PS in RH, not<br>shared by DM | PGSC0003DMG40202<br>1491 | PGSC0003DMT4000<br>55358 | chr06 | yes | yes |                                                                                                                                                                         |
| 1759 | Heterozygous<br>PS in RH, not<br>shared by DM | PGSC0003DMG40002<br>1502 | PGSC0003DMT4000<br>55381 | chr12 | NO  | NO  | GO:0008152; metabolic process;<br>Biological Process GO:0016758;<br>transferase activity, transferring hexosyl<br>groups; Molecular Function                            |
| 1760 | Heterozygous<br>PS in RH, not<br>shared by DM | PGSC0003DMG40002<br>1637 | PGSC0003DMT4000<br>55726 | chr06 | yes | NO  |                                                                                                                                                                         |
| 1761 | Heterozygous<br>PS in RH, not<br>shared by DM | PGSC0003DMG40002<br>1644 | PGSC0003DMT4000<br>55739 | chr09 | yes | NO  |                                                                                                                                                                         |
| 1762 | Heterozygous<br>PS in RH, not<br>shared by DM | PGSC0003DMG40002<br>1733 | PGSC0003DMT4000<br>55953 | chr12 | NO  | NO  |                                                                                                                                                                         |
| 1763 | Heterozygous<br>PS in RH, not<br>shared by DM | PGSC0003DMG40002<br>1743 | PGSC0003DMT4000<br>55971 | -     | NO  | NO  |                                                                                                                                                                         |
| 1764 | Heterozygous<br>PS in RH, not<br>shared by DM | PGSC0003DMG40002<br>1779 | PGSC0003DMT4000<br>56053 | chr12 | NO  | NO  |                                                                                                                                                                         |
| 1765 | Heterozygous<br>PS in RH, not<br>shared by DM | PGSC0003DMG40002<br>1800 | PGSC0003DMT4000<br>56118 | chr11 | yes | NO  |                                                                                                                                                                         |
| 1766 | Heterozygous<br>PS in RH, not<br>shared by DM | PGSC0003DMG40002<br>1827 | PGSC0003DMT4000<br>56178 | chr12 | yes | yes | GO:0006470; protein amino acid<br>dephosphorylation; Biological Process<br>GO:0008138; protein<br>tyrosine/serine/threonine phosphatase<br>activity; Molecular Function |



|      |                                               |                          |                          |       |     |     |                                                                                                                                                                                                                           |
|------|-----------------------------------------------|--------------------------|--------------------------|-------|-----|-----|---------------------------------------------------------------------------------------------------------------------------------------------------------------------------------------------------------------------------|
| 1767 | Heterozygous<br>PS in RH, not<br>shared by DM | PGSC0003DMG40002<br>1848 | PGSC0003DMT4000<br>56235 | chr03 | yes | yes | GO:0004871; signal transducer activity;<br>Molecular Function GO:0007186; G-<br>protein coupled receptor protein signaling<br>pathway; Biological Process GO:0019001;<br>guanyl nucleotide binding; Molecular<br>Function |
| 1768 | Heterozygous<br>PS in RH, not<br>shared by DM | PGSC0003DMG40002<br>1861 | PGSC0003DMT4000<br>56265 | chr01 | NO  | NO  |                                                                                                                                                                                                                           |
| 1769 | Heterozygous<br>PS in RH, not<br>shared by DM | PGSC0003DMG40102<br>1870 | PGSC0003DMT4000<br>56290 | chr05 | yes | yes | GO:0005215; transporter activity;<br>Molecular Function GO:0006857;<br>oligopeptide transport; Biological Process<br>GO:0016020; membrane; Cellular<br>Component                                                          |
| 1770 | Heterozygous<br>PS in RH, not<br>shared by DM | PGSC0003DMG40002<br>1878 | PGSC0003DMT4000<br>56317 | chr11 | yes | NO  |                                                                                                                                                                                                                           |
| 1771 | Heterozygous<br>PS in RH, not<br>shared by DM | PGSC0003DMG40002<br>1952 | PGSC0003DMT4000<br>56494 | -     | yes | NO  |                                                                                                                                                                                                                           |
| 1772 | Heterozygous<br>PS in RH, not<br>shared by DM | PGSC0003DMG40002<br>1985 | PGSC0003DMT4000<br>56551 | -     | yes | NO  | GO:0005985; sucrose metabolic process;<br>Biological Process                                                                                                                                                              |
| 1773 | Heterozygous<br>PS in RH, not<br>shared by DM | PGSC0003DMG40002<br>2004 | PGSC0003DMT4000<br>56602 | chr06 | yes | NO  | GO:0003993; acid phosphatase activity;<br>Molecular Function                                                                                                                                                              |
| 1774 | Heterozygous<br>PS in RH, not<br>shared by DM | PGSC0003DMG40002<br>2096 | PGSC0003DMT4000<br>56814 | chr11 | yes | NO  | GO:0019904; protein domain specific<br>binding; Molecular Function                                                                                                                                                        |
| 1775 | Heterozygous<br>PS in RH, not<br>shared by DM | PGSC0003DMG40002<br>2113 | PGSC0003DMT4000<br>56847 | chr09 | NO  | NO  |                                                                                                                                                                                                                           |
| 1776 | Heterozygous<br>PS in RH, not<br>shared by DM | PGSC0003DMG40002<br>2185 | PGSC0003DMT4000<br>57108 | chr12 | yes | yes |                                                                                                                                                                                                                           |
| 1777 | Heterozygous<br>PS in RH, not<br>shared by DM | PGSC0003DMG40202<br>2215 | PGSC0003DMT4000<br>57191 | chr09 | yes | yes |                                                                                                                                                                                                                           |

|      |                                               |                          |                          |       |     |     |                                                                                                                                                                                    |
|------|-----------------------------------------------|--------------------------|--------------------------|-------|-----|-----|------------------------------------------------------------------------------------------------------------------------------------------------------------------------------------|
| 1778 | Heterozygous<br>PS in RH, not<br>shared by DM | PGSC0003DMG40002<br>2223 | PGSC0003DMT4000<br>57210 | chr10 | yes | yes |                                                                                                                                                                                    |
| 1779 | Heterozygous<br>PS in RH, not<br>shared by DM | PGSC0003DMG40002<br>2417 | PGSC0003DMT4000<br>57740 | chr10 | NO  | NO  |                                                                                                                                                                                    |
| 1780 | Heterozygous<br>PS in RH, not<br>shared by DM | PGSC0003DMG40002<br>2422 | PGSC0003DMT4000<br>57758 | -     | yes | NO  | GO:0055085; transmembrane transport;<br>Biological Process                                                                                                                         |
| 1781 | Heterozygous<br>PS in RH, not<br>shared by DM | PGSC0003DMG40002<br>2438 | PGSC0003DMT4000<br>57795 | chr07 | yes | NO  |                                                                                                                                                                                    |
| 1782 | Heterozygous<br>PS in RH, not<br>shared by DM | PGSC0003DMG40002<br>2453 | PGSC0003DMT4000<br>57824 | -     | NO  | NO  |                                                                                                                                                                                    |
| 1783 | Heterozygous<br>PS in RH, not<br>shared by DM | PGSC0003DMG40002<br>2512 | PGSC0003DMT4000<br>57990 | chr07 | NO  | NO  |                                                                                                                                                                                    |
| 1784 | Heterozygous<br>PS in RH, not<br>shared by DM | PGSC0003DMG40002<br>2532 | PGSC0003DMT4000<br>58039 | chr06 | NO  | NO  |                                                                                                                                                                                    |
| 1785 | Heterozygous<br>PS in RH, not<br>shared by DM | PGSC0003DMG40002<br>2592 | PGSC0003DMT4000<br>58190 | chr08 | NO  | NO  |                                                                                                                                                                                    |
| 1786 | Heterozygous<br>PS in RH, not<br>shared by DM | PGSC0003DMG40002<br>2699 | PGSC0003DMT4000<br>58450 | chr07 | yes | yes | GO:0004672; protein kinase activity;<br>Molecular Function GO:0005524; ATP<br>binding; Molecular Function<br>GO:0006468; protein amino acid<br>phosphorylation; Biological Process |
| 1787 | Heterozygous<br>PS in RH, not<br>shared by DM | PGSC0003DMG40202<br>2702 | PGSC0003DMT4000<br>58458 | chr08 | NO  | NO  |                                                                                                                                                                                    |
| 1788 | Heterozygous<br>PS in RH, not<br>shared by DM | PGSC0003DMG40002<br>2703 | PGSC0003DMT4000<br>58461 | chr06 | yes | yes |                                                                                                                                                                                    |
| 1789 | Heterozygous<br>PS in RH, not<br>shared by DM | PGSC0003DMG40202<br>2708 | PGSC0003DMT4000<br>58473 | chr03 | NO  | NO  |                                                                                                                                                                                    |

|      |                                               |                          |                          |       |     |     |                                                                                                                                                                              |
|------|-----------------------------------------------|--------------------------|--------------------------|-------|-----|-----|------------------------------------------------------------------------------------------------------------------------------------------------------------------------------|
| 1790 | Heterozygous<br>PS in RH, not<br>shared by DM | PGSC0003DMG40002<br>2712 | PGSC0003DMT4000<br>58484 | chr04 | NO  | NO  |                                                                                                                                                                              |
| 1791 | Heterozygous<br>PS in RH, not<br>shared by DM | PGSC0003DMG40002<br>2740 | PGSC0003DMT4000<br>58538 | chr08 | yes | NO  | GO:0003824; catalytic activity; Molecular<br>Function GO:0008152; metabolic process;<br>Biological Process GO:0030170;<br>pyridoxal phosphate binding; Molecular<br>Function |
| 1792 | Heterozygous<br>PS in RH, not<br>shared by DM | PGSC0003DMG40002<br>2753 | PGSC0003DMT4000<br>58574 | chr07 | yes | NO  |                                                                                                                                                                              |
| 1793 | Heterozygous<br>PS in RH, not<br>shared by DM | PGSC0003DMG40002<br>2865 | PGSC0003DMT4000<br>58851 |       |     |     |                                                                                                                                                                              |
| 1794 | Heterozygous<br>PS in RH, not<br>shared by DM | PGSC0003DMG40002<br>2956 | PGSC0003DMT4000<br>59103 | chr07 | yes | yes |                                                                                                                                                                              |
| 1795 | Heterozygous<br>PS in RH, not<br>shared by DM | PGSC0003DMG40002<br>2977 | PGSC0003DMT4000<br>59155 | chr04 | NO  | NO  |                                                                                                                                                                              |
| 1796 | Heterozygous<br>PS in RH, not<br>shared by DM | PGSC0003DMG40002<br>3022 | PGSC0003DMT4000<br>59259 | -     | yes | NO  |                                                                                                                                                                              |
| 1797 | Heterozygous<br>PS in RH, not<br>shared by DM | PGSC0003DMG40002<br>3040 | PGSC0003DMT4000<br>59297 | chr08 | yes | NO  |                                                                                                                                                                              |
| 1798 | Heterozygous<br>PS in RH, not<br>shared by DM | PGSC0003DMG40202<br>3109 | PGSC0003DMT4000<br>59483 | chr12 | NO  | NO  |                                                                                                                                                                              |
| 1799 | Heterozygous<br>PS in RH, not<br>shared by DM | PGSC0003DMG40002<br>3203 | PGSC0003DMT4000<br>59686 | chr09 | yes | NO  | GO:0005524; ATP binding; Molecular<br>Function GO:0006915; apoptosis;<br>Biological Process                                                                                  |
| 1800 | Heterozygous<br>PS in RH, not<br>shared by DM | PGSC0003DMG40002<br>3213 | PGSC0003DMT4000<br>59708 | chr12 | NO  | NO  |                                                                                                                                                                              |

|      |                                               |                          |                          |       |     |     |                                                                                                                                                                                    |
|------|-----------------------------------------------|--------------------------|--------------------------|-------|-----|-----|------------------------------------------------------------------------------------------------------------------------------------------------------------------------------------|
| 1801 | Heterozygous<br>PS in RH, not<br>shared by DM | PGSC0003DMG40002<br>3349 | PGSC0003DMT4000<br>60008 | chr06 | yes | NO  | GO:0004185; serine-type<br>carboxypeptidase activity; Molecular<br>Function GO:0006508; proteolysis;<br>Biological Process                                                         |
| 1802 | Heterozygous<br>PS in RH, not<br>shared by DM | PGSC0003DMG40202<br>3369 | PGSC0003DMT4000<br>60080 | chr11 | NO  | NO  |                                                                                                                                                                                    |
| 1803 | Heterozygous<br>PS in RH, not<br>shared by DM | PGSC0003DMG40002<br>3377 | PGSC0003DMT4000<br>60099 | chr12 | yes | NO  |                                                                                                                                                                                    |
| 1804 | Heterozygous<br>PS in RH, not<br>shared by DM | PGSC0003DMG40002<br>3537 | PGSC0003DMT4000<br>60513 | chr04 | NO  | NO  |                                                                                                                                                                                    |
| 1805 | Heterozygous<br>PS in RH, not<br>shared by DM | PGSC0003DMG40002<br>3577 | PGSC0003DMT4000<br>60615 | chr11 | yes | yes | GO:0004672; protein kinase activity;<br>Molecular Function GO:0005524; ATP<br>binding; Molecular Function<br>GO:0006468; protein amino acid<br>phosphorylation; Biological Process |
| 1806 | Heterozygous<br>PS in RH, not<br>shared by DM | PGSC0003DMG40202<br>3595 | PGSC0003DMT4000<br>60663 | chr04 | yes | NO  |                                                                                                                                                                                    |
| 1807 | Heterozygous<br>PS in RH, not<br>shared by DM | PGSC0003DMG40002<br>3629 | PGSC0003DMT4000<br>60748 | chr03 | yes | NO  | GO:0045454; cell redox homeostasis;<br>Biological Process                                                                                                                          |
| 1808 | Heterozygous<br>PS in RH, not<br>shared by DM | PGSC0003DMG40002<br>3641 | PGSC0003DMT4000<br>60788 |       |     |     |                                                                                                                                                                                    |
| 1809 | Heterozygous<br>PS in RH, not<br>shared by DM | PGSC0003DMG40002<br>3681 | PGSC0003DMT4000<br>60876 | chr12 | yes | NO  |                                                                                                                                                                                    |
| 1810 | Heterozygous<br>PS in RH, not<br>shared by DM | PGSC0003DMG40002<br>3682 | PGSC0003DMT4000<br>60882 | chr06 | yes | NO  | GO:0005524; ATP binding; Molecular<br>Function GO:0006915; apoptosis;<br>Biological Process                                                                                        |
| 1811 | Heterozygous<br>PS in RH, not<br>shared by DM | PGSC0003DMG40002<br>3702 | PGSC0003DMT4000<br>60938 | chr09 | NO  | NO  |                                                                                                                                                                                    |

|      |                                               |                          |                          |       |     |     |                                                                                                                                                                                                       |
|------|-----------------------------------------------|--------------------------|--------------------------|-------|-----|-----|-------------------------------------------------------------------------------------------------------------------------------------------------------------------------------------------------------|
| 1812 | Heterozygous<br>PS in RH, not<br>shared by DM | PGSC0003DMG40002<br>3800 | PGSC0003DMT4000<br>61161 | chr06 | yes | NO  |                                                                                                                                                                                                       |
| 1813 | Heterozygous<br>PS in RH, not<br>shared by DM | PGSC0003DMG40002<br>3819 | PGSC0003DMT4000<br>61190 | -     | NO  | NO  |                                                                                                                                                                                                       |
| 1814 | Heterozygous<br>PS in RH, not<br>shared by DM | PGSC0003DMG40102<br>3866 | PGSC0003DMT4000<br>61316 | chr07 | yes | yes |                                                                                                                                                                                                       |
| 1815 | Heterozygous<br>PS in RH, not<br>shared by DM | PGSC0003DMG40002<br>3914 | PGSC0003DMT4000<br>61444 | chr04 | yes | NO  |                                                                                                                                                                                                       |
| 1816 | Heterozygous<br>PS in RH, not<br>shared by DM | PGSC0003DMG40102<br>3991 | PGSC0003DMT4000<br>61630 | chr04 | yes | yes |                                                                                                                                                                                                       |
| 1817 | Heterozygous<br>PS in RH, not<br>shared by DM | PGSC0003DMG40002<br>4021 | PGSC0003DMT4000<br>61719 | chr12 | NO  | NO  |                                                                                                                                                                                                       |
| 1818 | Heterozygous<br>PS in RH, not<br>shared by DM | PGSC0003DMG40002<br>4030 | PGSC0003DMT4000<br>61738 | chr05 | yes | yes |                                                                                                                                                                                                       |
| 1819 | Heterozygous<br>PS in RH, not<br>shared by DM | PGSC0003DMG40202<br>4077 | PGSC0003DMT4000<br>61881 | chr10 | yes | yes | GO:0003735; structural constituent of ribosome; Molecular Function GO:0005622; intracellular; Cellular Component GO:0005840; ribosome; Cellular Component GO:0006412; translation; Biological Process |
| 1820 | Heterozygous<br>PS in RH, not<br>shared by DM | PGSC0003DMG40002<br>4080 | PGSC0003DMT4000<br>61888 | chr04 | NO  | NO  |                                                                                                                                                                                                       |
| 1821 | Heterozygous<br>PS in RH, not<br>shared by DM | PGSC0003DMG40102<br>4096 | PGSC0003DMT4000<br>61916 | chr12 | yes | NO  | GO:0003824; catalytic activity; Molecular Function GO:0008152; metabolic process; Biological Process                                                                                                  |
| 1822 | Heterozygous<br>PS in RH, not<br>shared by DM | PGSC0003DMG40002<br>4125 | PGSC0003DMT4000<br>61991 | chr04 | yes | NO  |                                                                                                                                                                                                       |

|      |                                               |                          |                          |       |     |    |                                                                                                                                                                                                                                                                                                                                                                                                                                                                                                                                                |
|------|-----------------------------------------------|--------------------------|--------------------------|-------|-----|----|------------------------------------------------------------------------------------------------------------------------------------------------------------------------------------------------------------------------------------------------------------------------------------------------------------------------------------------------------------------------------------------------------------------------------------------------------------------------------------------------------------------------------------------------|
| 1823 | Heterozygous<br>PS in RH, not<br>shared by DM | PGSC0003DMG40002<br>4127 | PGSC0003DMT4000<br>61998 | chr10 | yes | NO |                                                                                                                                                                                                                                                                                                                                                                                                                                                                                                                                                |
| 1824 | Heterozygous<br>PS in RH, not<br>shared by DM | PGSC0003DMG40002<br>4207 | PGSC0003DMT4000<br>62197 | chr12 | NO  | NO |                                                                                                                                                                                                                                                                                                                                                                                                                                                                                                                                                |
| 1825 | Heterozygous<br>PS in RH, not<br>shared by DM | PGSC0003DMG40202<br>4222 | PGSC0003DMT4000<br>62256 | chr11 | NO  | NO |                                                                                                                                                                                                                                                                                                                                                                                                                                                                                                                                                |
| 1826 | Heterozygous<br>PS in RH, not<br>shared by DM | PGSC0003DMG40002<br>4279 | PGSC0003DMT4000<br>62383 | chr05 | yes | NO |                                                                                                                                                                                                                                                                                                                                                                                                                                                                                                                                                |
| 1827 | Heterozygous<br>PS in RH, not<br>shared by DM | PGSC0003DMG40002<br>4295 | PGSC0003DMT4000<br>62427 | chr01 | yes | NO | GO:0005737; cytoplasm; Cellular<br>Component GO:0005975; carbohydrate<br>metabolic process; Biological Process<br>GO:0016614; oxidoreductase activity,<br>acting on CH-OH group of donors;<br>Molecular Function GO:0016616;<br>oxidoreductase activity, acting on the CH-<br>OH group of donors, NAD or NADP as<br>acceptor; Molecular Function<br>GO:0046168; glycerol-3-phosphate<br>catabolic process; Biological Process<br>GO:0051287; NAD or NADH binding;<br>Molecular Function GO:0055114;<br>oxidation reduction; Biological Process |
| 1828 | Heterozygous<br>PS in RH, not<br>shared by DM | PGSC0003DMG40002<br>4353 | PGSC0003DMT4000<br>62588 | chr08 | yes | NO | GO:0003824; catalytic activity; Molecular<br>Function GO:0044237; cellular metabolic<br>process; Biological Process GO:0050662;<br>coenzyme binding; Molecular Function                                                                                                                                                                                                                                                                                                                                                                        |
| 1829 | Heterozygous<br>PS in RH, not<br>shared by DM | PGSC0003DMG40002<br>4385 | PGSC0003DMT4000<br>62659 | chr11 | NO  | NO |                                                                                                                                                                                                                                                                                                                                                                                                                                                                                                                                                |

|      |                                               |                          |                          |       |     |     |                                                                                                                                                                                                  |
|------|-----------------------------------------------|--------------------------|--------------------------|-------|-----|-----|--------------------------------------------------------------------------------------------------------------------------------------------------------------------------------------------------|
| 1830 | Heterozygous<br>PS in RH, not<br>shared by DM | PGSC0003DMG40002<br>4438 | PGSC0003DMT4000<br>62785 | chr09 | yes | NO  | GO:0004478; methionine<br>adenosyltransferase activity; Molecular<br>Function GO:0005524; ATP binding;<br>Molecular Function GO:0006730; one-<br>carbon metabolic process; Biological<br>Process |
| 1831 | Heterozygous<br>PS in RH, not<br>shared by DM | PGSC0003DMG40002<br>4453 | PGSC0003DMT4000<br>62819 | chr11 | NO  | NO  |                                                                                                                                                                                                  |
| 1832 | Heterozygous<br>PS in RH, not<br>shared by DM | PGSC0003DMG40002<br>4457 | PGSC0003DMT4000<br>62828 | chr09 | NO  | NO  |                                                                                                                                                                                                  |
| 1833 | Heterozygous<br>PS in RH, not<br>shared by DM | PGSC0003DMG40202<br>4473 | PGSC0003DMT4000<br>62874 | chr05 | NO  | NO  | GO:0008146; sulfotransferase activity;<br>Molecular Function                                                                                                                                     |
| 1834 | Heterozygous<br>PS in RH, not<br>shared by DM | PGSC0003DMG40002<br>4474 | PGSC0003DMT4000<br>62877 | chr11 | NO  | NO  |                                                                                                                                                                                                  |
| 1835 | Heterozygous<br>PS in RH, not<br>shared by DM | PGSC0003DMG40002<br>4518 | PGSC0003DMT4000<br>63011 | chr07 | yes | yes |                                                                                                                                                                                                  |
| 1836 | Heterozygous<br>PS in RH, not<br>shared by DM | PGSC0003DMG40002<br>4609 | PGSC0003DMT4000<br>63273 | chr10 | yes | NO  | GO:0006508; proteolysis; Biological<br>Process GO:0008234; cysteine-type<br>peptidase activity; Molecular Function                                                                               |
| 1837 | Heterozygous<br>PS in RH, not<br>shared by DM | PGSC0003DMG40002<br>4657 | PGSC0003DMT4000<br>63388 | chr04 | yes | NO  |                                                                                                                                                                                                  |
| 1838 | Heterozygous<br>PS in RH, not<br>shared by DM | PGSC0003DMG40002<br>4690 | PGSC0003DMT4000<br>63452 | chr05 | NO  | NO  |                                                                                                                                                                                                  |
| 1839 | Heterozygous<br>PS in RH, not<br>shared by DM | PGSC0003DMG40002<br>4713 | PGSC0003DMT4000<br>63561 | chr01 | yes | NO  | GO:0004553; hydrolase activity,<br>hydrolyzing O-glycosyl compounds;<br>Molecular Function GO:0005975;<br>carbohydrate metabolic process;<br>Biological Process                                  |
| 1840 | Heterozygous<br>PS in RH, not<br>shared by DM | PGSC0003DMG40002<br>4807 | PGSC0003DMT4000<br>63816 | chr10 | NO  | NO  |                                                                                                                                                                                                  |

|      |                                               |                          |                          |       |     |    |                                                                                                             |
|------|-----------------------------------------------|--------------------------|--------------------------|-------|-----|----|-------------------------------------------------------------------------------------------------------------|
| 1841 | Heterozygous<br>PS in RH, not<br>shared by DM | PGSC0003DMG40002<br>4809 | PGSC0003DMT4000<br>63818 | -     | yes | NO |                                                                                                             |
| 1842 | Heterozygous<br>PS in RH, not<br>shared by DM | PGSC0003DMG40002<br>4814 | PGSC0003DMT4000<br>63833 | chr12 | yes | NO |                                                                                                             |
| 1843 | Heterozygous<br>PS in RH, not<br>shared by DM | PGSC0003DMG40202<br>4817 | PGSC0003DMT4000<br>63848 | chr07 | yes | NO |                                                                                                             |
| 1844 | Heterozygous<br>PS in RH, not<br>shared by DM | PGSC0003DMG40002<br>4823 | PGSC0003DMT4000<br>63864 | chr03 | NO  | NO |                                                                                                             |
| 1845 | Heterozygous<br>PS in RH, not<br>shared by DM | PGSC0003DMG40002<br>4827 | PGSC0003DMT4000<br>63870 | chr04 | yes | NO |                                                                                                             |
| 1846 | Heterozygous<br>PS in RH, not<br>shared by DM | PGSC0003DMG40002<br>4829 | PGSC0003DMT4000<br>63876 | chr04 | yes | NO | GO:0016787; hydrolase activity;<br>Molecular Function                                                       |
| 1847 | Heterozygous<br>PS in RH, not<br>shared by DM | PGSC0003DMG40002<br>4881 | PGSC0003DMT4000<br>64014 | chr04 | yes | NO |                                                                                                             |
| 1848 | Heterozygous<br>PS in RH, not<br>shared by DM | PGSC0003DMG40002<br>4883 | PGSC0003DMT4000<br>64020 | chr06 | NO  | NO | GO:0003676; nucleic acid binding;<br>Molecular Function GO:0008270; zinc ion<br>binding; Molecular Function |
| 1849 | Heterozygous<br>PS in RH, not<br>shared by DM | PGSC0003DMG40002<br>4891 | PGSC0003DMT4000<br>64041 | chr05 | NO  | NO |                                                                                                             |
| 1850 | Heterozygous<br>PS in RH, not<br>shared by DM | PGSC0003DMG40302<br>4894 | PGSC0003DMT4000<br>64050 | -     | NO  | NO |                                                                                                             |
| 1851 | Heterozygous<br>PS in RH, not<br>shared by DM | PGSC0003DMG40002<br>4906 | PGSC0003DMT4000<br>64096 | chr07 | NO  | NO |                                                                                                             |
| 1852 | Heterozygous<br>PS in RH, not<br>shared by DM | PGSC0003DMG40002<br>4908 | PGSC0003DMT4000<br>64100 | chr06 | NO  | NO |                                                                                                             |



|      |                                               |                          |                          |       |     |     |                                                                                                                                                                       |
|------|-----------------------------------------------|--------------------------|--------------------------|-------|-----|-----|-----------------------------------------------------------------------------------------------------------------------------------------------------------------------|
| 1853 | Heterozygous<br>PS in RH, not<br>shared by DM | PGSC0003DMG40002<br>4922 | PGSC0003DMT4000<br>64148 | chr11 | NO  | NO  |                                                                                                                                                                       |
| 1854 | Heterozygous<br>PS in RH, not<br>shared by DM | PGSC0003DMG40002<br>4951 | PGSC0003DMT4000<br>64225 | chr04 | NO  | NO  | GO:0003676; nucleic acid binding;<br>Molecular Function GO:0005622;<br>intracellular; Cellular Component<br>GO:0008270; zinc ion binding; Molecular<br>Function       |
| 1855 | Heterozygous<br>PS in RH, not<br>shared by DM | PGSC0003DMG40002<br>4987 | PGSC0003DMT4000<br>64314 | chr07 | NO  | NO  |                                                                                                                                                                       |
| 1856 | Heterozygous<br>PS in RH, not<br>shared by DM | PGSC0003DMG40002<br>4989 | PGSC0003DMT4000<br>64322 | -     | NO  | NO  | GO:0005618; cell wall; Cellular<br>Component GO:0030599; pectinesterase<br>activity; Molecular Function<br>GO:0042545; cell wall modification;<br>Biological Process  |
| 1857 | Heterozygous<br>PS in RH, not<br>shared by DM | PGSC0003DMG40002<br>4993 | PGSC0003DMT4000<br>64326 | chr01 | NO  | NO  |                                                                                                                                                                       |
| 1858 | Heterozygous<br>PS in RH, not<br>shared by DM | PGSC0003DMG40002<br>4995 | PGSC0003DMT4000<br>64337 | -     | yes | NO  | GO:0004497; monooxygenase activity;<br>Molecular Function GO:0055114;<br>oxidation reduction; Biological Process                                                      |
| 1859 | Heterozygous<br>PS in RH, not<br>shared by DM | PGSC0003DMG40002<br>5108 | PGSC0003DMT4000<br>64620 | chr06 | yes | NO  | GO:0000175; 3'-5'-exoribonuclease<br>activity; Molecular Function<br>GO:0003723; RNA binding; Molecular<br>Function GO:0006396; RNA processing;<br>Biological Process |
| 1860 | Heterozygous<br>PS in RH, not<br>shared by DM | PGSC0003DMG40002<br>5122 | PGSC0003DMT4000<br>64673 | chr12 | NO  | NO  |                                                                                                                                                                       |
| 1861 | Heterozygous<br>PS in RH, not<br>shared by DM | PGSC0003DMG40002<br>5124 | PGSC0003DMT4000<br>64681 | chr12 | yes | yes |                                                                                                                                                                       |

|      |                                               |                          |                          |       |     |     |                                                                                                                                                                                                                                                                                                 |
|------|-----------------------------------------------|--------------------------|--------------------------|-------|-----|-----|-------------------------------------------------------------------------------------------------------------------------------------------------------------------------------------------------------------------------------------------------------------------------------------------------|
| 1862 | Heterozygous<br>PS in RH, not<br>shared by DM | PGSC0003DMG40002<br>5148 | PGSC0003DMT4000<br>64740 | chr02 | yes | NO  | GO:0004672; protein kinase activity;<br>Molecular Function GO:0005524; ATP<br>binding; Molecular Function<br>GO:0005529; sugar binding; Molecular<br>Function GO:0006468; protein amino acid<br>phosphorylation; Biological Process<br>GO:0048544; recognition of pollen;<br>Biological Process |
| 1863 | Heterozygous<br>PS in RH, not<br>shared by DM | PGSC0003DMG40002<br>5175 | PGSC0003DMT4000<br>64824 | chr11 | yes | NO  |                                                                                                                                                                                                                                                                                                 |
| 1864 | Heterozygous<br>PS in RH, not<br>shared by DM | PGSC0003DMG40002<br>5182 | PGSC0003DMT4000<br>64854 | chr04 | yes | yes | GO:0005524; ATP binding; Molecular<br>Function GO:0006915; apoptosis;<br>Biological Process                                                                                                                                                                                                     |
| 1865 | Heterozygous<br>PS in RH, not<br>shared by DM | PGSC0003DMG40002<br>5195 | PGSC0003DMT4000<br>64882 | -     | NO  | NO  |                                                                                                                                                                                                                                                                                                 |
| 1866 | Heterozygous<br>PS in RH, not<br>shared by DM | PGSC0003DMG40002<br>5276 | PGSC0003DMT4000<br>65051 | chr10 | yes | NO  | GO:0003700; transcription factor activity;<br>Molecular Function GO:0005634;<br>nucleus; Cellular Component<br>GO:0006355; regulation of transcription,<br>DNA-dependent; Biological Process                                                                                                    |
| 1867 | Heterozygous<br>PS in RH, not<br>shared by DM | PGSC0003DMG40002<br>5283 | PGSC0003DMT4000<br>65069 | chr04 | yes | yes |                                                                                                                                                                                                                                                                                                 |
| 1868 | Heterozygous<br>PS in RH, not<br>shared by DM | PGSC0003DMG40002<br>5373 | PGSC0003DMT4000<br>65273 | chr05 | yes | NO  |                                                                                                                                                                                                                                                                                                 |
| 1869 | Heterozygous<br>PS in RH, not<br>shared by DM | PGSC0003DMG40002<br>5383 | PGSC0003DMT4000<br>65295 | chr04 | NO  | NO  |                                                                                                                                                                                                                                                                                                 |
| 1870 | Heterozygous<br>PS in RH, not<br>shared by DM | PGSC0003DMG40002<br>5384 | PGSC0003DMT4000<br>65297 | chr05 | NO  | NO  |                                                                                                                                                                                                                                                                                                 |
| 1871 | Heterozygous<br>PS in RH, not<br>shared by DM | PGSC0003DMG40002<br>5454 | PGSC0003DMT4000<br>65446 | chr08 | NO  | NO  |                                                                                                                                                                                                                                                                                                 |

|      |                                               |                          |                          |       |     |     |                                                                                                                                                                                                                               |
|------|-----------------------------------------------|--------------------------|--------------------------|-------|-----|-----|-------------------------------------------------------------------------------------------------------------------------------------------------------------------------------------------------------------------------------|
| 1872 | Heterozygous<br>PS in RH, not<br>shared by DM | PGSC0003DMG40002<br>5487 | PGSC0003DMT4000<br>65512 | chr08 | NO  | NO  |                                                                                                                                                                                                                               |
| 1873 | Heterozygous<br>PS in RH, not<br>shared by DM | PGSC0003DMG40002<br>5489 | PGSC0003DMT4000<br>65515 | chr05 | yes | NO  | GO:0004615; phosphomannomutase<br>activity; Molecular Function<br>GO:0005737; cytoplasm; Cellular<br>Component GO:0019307; mannose<br>biosynthetic process; Biological Process                                                |
| 1874 | Heterozygous<br>PS in RH, not<br>shared by DM | PGSC0003DMG40002<br>5504 | PGSC0003DMT4000<br>65555 | -     | NO  | NO  |                                                                                                                                                                                                                               |
| 1875 | Heterozygous<br>PS in RH, not<br>shared by DM | PGSC0003DMG40002<br>5540 | PGSC0003DMT4000<br>65650 | chr10 | yes | yes | GO:0005524; ATP binding; Molecular<br>Function GO:0006915; apoptosis;<br>Biological Process                                                                                                                                   |
| 1876 | Heterozygous<br>PS in RH, not<br>shared by DM | PGSC0003DMG40002<br>5553 | PGSC0003DMT4000<br>65687 | chr08 | yes | NO  | GO:0008654; phospholipid biosynthetic<br>process; Biological Process GO:0016020;<br>membrane; Cellular Component<br>GO:0016780; phosphotransferase activity,<br>for other substituted phosphate groups;<br>Molecular Function |
| 1877 | Heterozygous<br>PS in RH, not<br>shared by DM | PGSC0003DMG40002<br>5582 | PGSC0003DMT4000<br>65732 | chr09 | NO  | NO  |                                                                                                                                                                                                                               |
| 1878 | Heterozygous<br>PS in RH, not<br>shared by DM | PGSC0003DMG40002<br>5599 | PGSC0003DMT4000<br>65769 | chr05 | yes | NO  |                                                                                                                                                                                                                               |
| 1879 | Heterozygous<br>PS in RH, not<br>shared by DM | PGSC0003DMG40002<br>5611 | PGSC0003DMT4000<br>65792 | chr10 | yes | yes | GO:0005524; ATP binding; Molecular<br>Function GO:0006915; apoptosis;<br>Biological Process                                                                                                                                   |
| 1880 | Heterozygous<br>PS in RH, not<br>shared by DM | PGSC0003DMG40002<br>5613 | PGSC0003DMT4000<br>65801 | chr04 | yes | NO  |                                                                                                                                                                                                                               |
| 1881 | Heterozygous<br>PS in RH, not<br>shared by DM | PGSC0003DMG40002<br>5635 | PGSC0003DMT4000<br>65855 | chr06 | yes | NO  |                                                                                                                                                                                                                               |

|      |                                               |                          |                          |       |     |     |                                                                                                                                                                                                                                     |
|------|-----------------------------------------------|--------------------------|--------------------------|-------|-----|-----|-------------------------------------------------------------------------------------------------------------------------------------------------------------------------------------------------------------------------------------|
| 1882 | Heterozygous<br>PS in RH, not<br>shared by DM | PGSC0003DMG40002<br>5652 | PGSC0003DMT4000<br>65899 | chr09 | NO  | NO  |                                                                                                                                                                                                                                     |
| 1883 | Heterozygous<br>PS in RH, not<br>shared by DM | PGSC0003DMG40002<br>5686 | PGSC0003DMT4000<br>65984 | chr12 | NO  | NO  |                                                                                                                                                                                                                                     |
| 1884 | Heterozygous<br>PS in RH, not<br>shared by DM | PGSC0003DMG40002<br>5695 | PGSC0003DMT4000<br>66004 | -     | yes | NO  |                                                                                                                                                                                                                                     |
| 1885 | Heterozygous<br>PS in RH, not<br>shared by DM | PGSC0003DMG40302<br>5788 | PGSC0003DMT4000<br>66304 | chr01 | NO  | NO  |                                                                                                                                                                                                                                     |
| 1886 | Heterozygous<br>PS in RH, not<br>shared by DM | PGSC0003DMG40002<br>5795 | PGSC0003DMT4000<br>66337 | -     | NO  | NO  |                                                                                                                                                                                                                                     |
| 1887 | Heterozygous<br>PS in RH, not<br>shared by DM | PGSC0003DMG40002<br>5800 | PGSC0003DMT4000<br>66349 | chr08 | yes | NO  |                                                                                                                                                                                                                                     |
| 1888 | Heterozygous<br>PS in RH, not<br>shared by DM | PGSC0003DMG40002<br>5827 | PGSC0003DMT4000<br>66414 | chr10 | yes | yes | GO:0005515; protein binding; Molecular<br>Function                                                                                                                                                                                  |
| 1889 | Heterozygous<br>PS in RH, not<br>shared by DM | PGSC0003DMG40102<br>5828 | PGSC0003DMT4000<br>66419 | chr09 | NO  | NO  |                                                                                                                                                                                                                                     |
| 1890 | Heterozygous<br>PS in RH, not<br>shared by DM | PGSC0003DMG40002<br>5878 | PGSC0003DMT4000<br>66576 | chr03 | yes | yes | GO:0004672; protein kinase activity;<br>Molecular Function GO:0005524; ATP<br>binding; Molecular Function<br>GO:0005529; sugar binding; Molecular<br>Function GO:0006468; protein amino acid<br>phosphorylation; Biological Process |
| 1891 | Heterozygous<br>PS in RH, not<br>shared by DM | PGSC0003DMG40102<br>5898 | PGSC0003DMT4000<br>66626 | chr01 | yes | NO  | GO:0004601; peroxidase activity;<br>Molecular Function GO:0006979;<br>response to oxidative stress; Biological<br>Process GO:0020037; heme binding;<br>Molecular Function GO:0055114;<br>oxidation reduction; Biological Process    |

|      |                                               |                          |                          |       |     |     |                                                                                                                                                                                                                       |
|------|-----------------------------------------------|--------------------------|--------------------------|-------|-----|-----|-----------------------------------------------------------------------------------------------------------------------------------------------------------------------------------------------------------------------|
| 1892 | Heterozygous<br>PS in RH, not<br>shared by DM | PGSC0003DMG40002<br>5951 | PGSC0003DMT4000<br>66756 | chr06 | NO  | NO  | GO:0009058; biosynthetic process;<br>Biological Process GO:0016769;<br>transferase activity, transferring<br>nitrogenous groups; Molecular Function<br>GO:0030170; pyridoxal phosphate<br>binding; Molecular Function |
| 1893 | Heterozygous<br>PS in RH, not<br>shared by DM | PGSC0003DMG40002<br>6089 | PGSC0003DMT4000<br>67114 | chr01 | yes | NO  |                                                                                                                                                                                                                       |
| 1894 | Heterozygous<br>PS in RH, not<br>shared by DM | PGSC0003DMG40002<br>6188 | PGSC0003DMT4000<br>67356 | chr03 | yes | NO  |                                                                                                                                                                                                                       |
| 1895 | Heterozygous<br>PS in RH, not<br>shared by DM | PGSC0003DMG40002<br>6251 | PGSC0003DMT4000<br>67513 | chr07 | NO  | NO  | GO:0016787; hydrolase activity;<br>Molecular Function                                                                                                                                                                 |
| 1896 | Heterozygous<br>PS in RH, not<br>shared by DM | PGSC0003DMG40002<br>6271 | PGSC0003DMT4000<br>67568 | chr01 | yes | NO  |                                                                                                                                                                                                                       |
| 1897 | Heterozygous<br>PS in RH, not<br>shared by DM | PGSC0003DMG40002<br>6305 | PGSC0003DMT4000<br>67641 | chr01 | yes | yes |                                                                                                                                                                                                                       |
| 1898 | Heterozygous<br>PS in RH, not<br>shared by DM | PGSC0003DMG40102<br>6387 | PGSC0003DMT4000<br>67845 | chr07 | yes | NO  | GO:0003777; microtubule motor activity;<br>Molecular Function GO:0005524; ATP<br>binding; Molecular Function<br>GO:0007018; microtubule-based<br>movement; Biological Process                                         |
| 1899 | Heterozygous<br>PS in RH, not<br>shared by DM | PGSC0003DMG40202<br>6387 | PGSC0003DMT4000<br>67846 | chr07 | yes | NO  |                                                                                                                                                                                                                       |
| 1900 | Heterozygous<br>PS in RH, not<br>shared by DM | PGSC0003DMG40202<br>6407 | PGSC0003DMT4000<br>67900 | chr09 | NO  | NO  |                                                                                                                                                                                                                       |

|      |                                               |                          |                          |       |     |     |                                                                                                                                                                                                                                                     |
|------|-----------------------------------------------|--------------------------|--------------------------|-------|-----|-----|-----------------------------------------------------------------------------------------------------------------------------------------------------------------------------------------------------------------------------------------------------|
| 1901 | Heterozygous<br>PS in RH, not<br>shared by DM | PGSC0003DMG40002<br>6410 | PGSC0003DMT4000<br>67908 | chr05 | NO  | NO  | GO:0016020; membrane; Cellular<br>Component GO:0030001; metal ion<br>transport; Biological Process<br>GO:0046873; metal ion transmembrane<br>transporter activity; Molecular Function<br>GO:0055085; transmembrane transport;<br>Biological Process |
| 1902 | Heterozygous<br>PS in RH, not<br>shared by DM | PGSC0003DMG40002<br>6459 | PGSC0003DMT4000<br>68033 | chr05 | NO  | NO  |                                                                                                                                                                                                                                                     |
| 1903 | Heterozygous<br>PS in RH, not<br>shared by DM | PGSC0003DMG40002<br>6506 | PGSC0003DMT4000<br>68155 | chr08 | yes | NO  | GO:0008080; N-acetyltransferase activity;<br>Molecular Function GO:0008152;<br>metabolic process; Biological Process                                                                                                                                |
| 1904 | Heterozygous<br>PS in RH, not<br>shared by DM | PGSC0003DMG40102<br>6514 | PGSC0003DMT4000<br>68174 | chr02 | yes | NO  | GO:0016998; cell wall macromolecule<br>catabolic process; Biological Process<br>GO:0033903; endo-1,3(4)-beta-glucanase<br>activity; Molecular Function                                                                                              |
| 1905 | Heterozygous<br>PS in RH, not<br>shared by DM | PGSC0003DMG40202<br>6514 | PGSC0003DMT4000<br>68172 | chr01 | yes | NO  |                                                                                                                                                                                                                                                     |
| 1906 | Heterozygous<br>PS in RH, not<br>shared by DM | PGSC0003DMG40102<br>6519 | PGSC0003DMT4000<br>68189 | chr08 | yes | NO  |                                                                                                                                                                                                                                                     |
| 1907 | Heterozygous<br>PS in RH, not<br>shared by DM | PGSC0003DMG40002<br>6520 | PGSC0003DMT4000<br>68212 | chr08 | NO  | NO  |                                                                                                                                                                                                                                                     |
| 1908 | Heterozygous<br>PS in RH, not<br>shared by DM | PGSC0003DMG40002<br>6547 | PGSC0003DMT4000<br>68290 | chr07 | yes | NO  | GO:0003676; nucleic acid binding;<br>Molecular Function GO:0008270; zinc ion<br>binding; Molecular Function                                                                                                                                         |
| 1909 | Heterozygous<br>PS in RH, not<br>shared by DM | PGSC0003DMG40202<br>6624 | PGSC0003DMT4000<br>68473 | chr08 | yes | NO  |                                                                                                                                                                                                                                                     |
| 1910 | Heterozygous<br>PS in RH, not<br>shared by DM | PGSC0003DMG40002<br>6640 | PGSC0003DMT4000<br>68503 | chr03 | yes | yes |                                                                                                                                                                                                                                                     |

|      |                                               |                          |                          |       |     |     |                                                                                                                                                                                                                                                                                                                                                                                                                                                                                                                                                                                                                               |
|------|-----------------------------------------------|--------------------------|--------------------------|-------|-----|-----|-------------------------------------------------------------------------------------------------------------------------------------------------------------------------------------------------------------------------------------------------------------------------------------------------------------------------------------------------------------------------------------------------------------------------------------------------------------------------------------------------------------------------------------------------------------------------------------------------------------------------------|
| 1911 | Heterozygous<br>PS in RH, not<br>shared by DM | PGSC0003DMG40102<br>6661 | PGSC0003DMT4000<br>68536 | chr03 | yes | NO  |                                                                                                                                                                                                                                                                                                                                                                                                                                                                                                                                                                                                                               |
| 1912 | Heterozygous<br>PS in RH, not<br>shared by DM | PGSC0003DMG40002<br>6666 | PGSC0003DMT4000<br>68569 | chr06 | yes | NO  |                                                                                                                                                                                                                                                                                                                                                                                                                                                                                                                                                                                                                               |
| 1913 | Heterozygous<br>PS in RH, not<br>shared by DM | PGSC0003DMG40002<br>6690 | PGSC0003DMT4000<br>68637 | chr09 | yes | yes | GO:0004713; protein tyrosine kinase activity; Molecular Function GO:0005524; ATP binding; Molecular Function GO:0006468; protein amino acid phosphorylation; Biological Process GO:0004601; peroxidase activity; Molecular Function GO:0006979; response to oxidative stress; Biological Process GO:0020037; heme binding; Molecular Function GO:0055114; oxidation reduction; Biological Process GO:0006812; cation transport; Biological Process GO:0008324; cation transmembrane transporter activity; Molecular Function GO:0016020; membrane; Cellular Component GO:0055085; transmembrane transport; Biological Process |
| 1914 | Heterozygous<br>PS in RH, not<br>shared by DM | PGSC0003DMG40002<br>6698 | PGSC0003DMT4000<br>68662 | chr03 | yes | yes | GO:0004601; peroxidase activity; Molecular Function GO:0006979; response to oxidative stress; Biological Process GO:0020037; heme binding; Molecular Function GO:0055114; oxidation reduction; Biological Process GO:0006812; cation transport; Biological Process GO:0008324; cation transmembrane transporter activity; Molecular Function GO:0016020; membrane; Cellular Component GO:0055085; transmembrane transport; Biological Process                                                                                                                                                                                 |
| 1915 | Heterozygous<br>PS in RH, not<br>shared by DM | PGSC0003DMG40002<br>6749 | PGSC0003DMT4000<br>68787 | chr06 | yes | NO  | GO:0003735; structural constituent of ribosome; Molecular Function GO:0005507; copper ion binding; Molecular Function GO:0005622; intracellular; Cellular Component GO:0005840; ribosome; Cellular Component GO:0006412; translation; Biological Process GO:0016491; oxidoreductase activity; Molecular Function GO:0055114; oxidation reduction; Biological Process                                                                                                                                                                                                                                                          |
| 1916 | Heterozygous<br>PS in RH, not<br>shared by DM | PGSC0003DMG40002<br>6760 | PGSC0003DMT4000<br>68804 | chr04 | yes | NO  | GO:0003735; structural constituent of ribosome; Molecular Function GO:0005507; copper ion binding; Molecular Function GO:0005622; intracellular; Cellular Component GO:0005840; ribosome; Cellular Component GO:0006412; translation; Biological Process GO:0016491; oxidoreductase activity; Molecular Function GO:0055114; oxidation reduction; Biological Process                                                                                                                                                                                                                                                          |
| 1917 | Heterozygous<br>PS in RH, not<br>shared by DM | PGSC0003DMG40002<br>6829 | PGSC0003DMT4000<br>68977 | chr05 | yes | yes |                                                                                                                                                                                                                                                                                                                                                                                                                                                                                                                                                                                                                               |

|      |                                               |                          |                          |       |     |     |                                                                                                                                                                                                                                                                                                 |
|------|-----------------------------------------------|--------------------------|--------------------------|-------|-----|-----|-------------------------------------------------------------------------------------------------------------------------------------------------------------------------------------------------------------------------------------------------------------------------------------------------|
| 1918 | Heterozygous<br>PS in RH, not<br>shared by DM | PGSC0003DMG40002<br>6860 | PGSC0003DMT4000<br>69046 | chr03 | NO  | NO  | GO:0008270; zinc ion binding; Molecular<br>Function                                                                                                                                                                                                                                             |
| 1919 | Heterozygous<br>PS in RH, not<br>shared by DM | PGSC0003DMG40002<br>6863 | PGSC0003DMT4000<br>69059 | chr08 | NO  | NO  | GO:0000151; ubiquitin ligase complex;<br>Cellular Component GO:0004842;<br>ubiquitin-protein ligase activity;<br>Molecular Function GO:0005634;<br>nucleus; Cellular Component<br>GO:0008270; zinc ion binding; Molecular<br>Function GO:0016567; protein<br>ubiquitination; Biological Process |
| 1920 | Heterozygous<br>PS in RH, not<br>shared by DM | PGSC0003DMG40002<br>6864 | PGSC0003DMT4000<br>69062 | chr04 | yes | yes |                                                                                                                                                                                                                                                                                                 |
| 1921 | Heterozygous<br>PS in RH, not<br>shared by DM | PGSC0003DMG40002<br>6867 | PGSC0003DMT4000<br>69067 | chr06 | NO  | NO  |                                                                                                                                                                                                                                                                                                 |
| 1922 | Heterozygous<br>PS in RH, not<br>shared by DM | PGSC0003DMG40002<br>6869 | PGSC0003DMT4000<br>69076 | chr02 | yes | NO  |                                                                                                                                                                                                                                                                                                 |
| 1923 | Heterozygous<br>PS in RH, not<br>shared by DM | PGSC0003DMG40002<br>6879 | PGSC0003DMT4000<br>69104 | chr01 | yes | yes | GO:0005622; intracellular; Cellular<br>Component GO:0008270; zinc ion<br>binding; Molecular Function                                                                                                                                                                                            |
| 1924 | Heterozygous<br>PS in RH, not<br>shared by DM | PGSC0003DMG40002<br>6913 | PGSC0003DMT4000<br>69189 | chr06 | NO  | NO  | GO:0004866; endopeptidase inhibitor<br>activity; Molecular Function                                                                                                                                                                                                                             |
| 1925 | Heterozygous<br>PS in RH, not<br>shared by DM | PGSC0003DMG40002<br>6927 | PGSC0003DMT4000<br>69225 | chr04 | yes | NO  | GO:0030528; transcription regulator<br>activity; Molecular Function<br>GO:0045449; regulation of transcription;<br>Biological Process                                                                                                                                                           |
| 1926 | Heterozygous<br>PS in RH, not<br>shared by DM | PGSC0003DMG40002<br>6955 | PGSC0003DMT4000<br>69293 | chr04 | yes | NO  |                                                                                                                                                                                                                                                                                                 |
| 1927 | Heterozygous<br>PS in RH, not<br>shared by DM | PGSC0003DMG40002<br>6966 | PGSC0003DMT4000<br>69321 | chr10 | yes | NO  | GO:0008152; metabolic process;<br>Biological Process GO:0016491;<br>oxidoreductase activity; Molecular<br>Function                                                                                                                                                                              |



|      |                                               |                          |                          |       |     |     |                                                                                                                                                                                                      |
|------|-----------------------------------------------|--------------------------|--------------------------|-------|-----|-----|------------------------------------------------------------------------------------------------------------------------------------------------------------------------------------------------------|
| 1928 | Heterozygous<br>PS in RH, not<br>shared by DM | PGSC0003DMG40102<br>7016 | PGSC0003DMT4000<br>69493 | chr10 | yes | yes |                                                                                                                                                                                                      |
| 1929 | Heterozygous<br>PS in RH, not<br>shared by DM | PGSC0003DMG40002<br>7038 | PGSC0003DMT4000<br>69555 | chr04 | yes | NO  |                                                                                                                                                                                                      |
| 1930 | Heterozygous<br>PS in RH, not<br>shared by DM | PGSC0003DMG40002<br>7057 | PGSC0003DMT4000<br>69593 | chr03 | yes | NO  | GO:0008270; zinc ion binding; Molecular<br>Function                                                                                                                                                  |
| 1931 | Heterozygous<br>PS in RH, not<br>shared by DM | PGSC0003DMG40002<br>7149 | PGSC0003DMT4000<br>69822 | chr01 | NO  | NO  |                                                                                                                                                                                                      |
| 1932 | Heterozygous<br>PS in RH, not<br>shared by DM | PGSC0003DMG40002<br>7183 | PGSC0003DMT4000<br>69901 | chr01 | yes | yes |                                                                                                                                                                                                      |
| 1933 | Heterozygous<br>PS in RH, not<br>shared by DM | PGSC0003DMG40002<br>7246 | PGSC0003DMT4000<br>70067 | chr08 | yes | NO  |                                                                                                                                                                                                      |
| 1934 | Heterozygous<br>PS in RH, not<br>shared by DM | PGSC0003DMG40002<br>7289 | PGSC0003DMT4000<br>70214 | chr12 | NO  | NO  |                                                                                                                                                                                                      |
| 1935 | Heterozygous<br>PS in RH, not<br>shared by DM | PGSC0003DMG40002<br>7306 | PGSC0003DMT4000<br>70235 | chr02 | yes | NO  | GO:0004345; glucose-6-phosphate<br>dehydrogenase activity; Molecular<br>Function GO:0006006; glucose metabolic<br>process; Biological Process GO:0055114;<br>oxidation reduction; Biological Process |
| 1936 | Heterozygous<br>PS in RH, not<br>shared by DM | PGSC0003DMG40302<br>7324 | PGSC0003DMT4000<br>70283 | -     | yes | NO  |                                                                                                                                                                                                      |
| 1937 | Heterozygous<br>PS in RH, not<br>shared by DM | PGSC0003DMG40002<br>7336 | PGSC0003DMT4000<br>70308 | chr03 | yes | NO  |                                                                                                                                                                                                      |

|      |                                               |                          |                          |       |     |     |                                                                                                                                                                                                                               |
|------|-----------------------------------------------|--------------------------|--------------------------|-------|-----|-----|-------------------------------------------------------------------------------------------------------------------------------------------------------------------------------------------------------------------------------|
| 1938 | Heterozygous<br>PS in RH, not<br>shared by DM | PGSC0003DMG40002<br>7343 | PGSC0003DMT4000<br>70323 | chr04 | yes | NO  | GO:0004497; monooxygenase activity;<br>Molecular Function GO:0005506; iron ion<br>binding; Molecular Function<br>GO:0009055; electron carrier activity;<br>Molecular Function GO:0020037; heme<br>binding; Molecular Function |
| 1939 | Heterozygous<br>PS in RH, not<br>shared by DM | PGSC0003DMG40002<br>7377 | PGSC0003DMT4000<br>70419 | chr11 | NO  | NO  |                                                                                                                                                                                                                               |
| 1940 | Heterozygous<br>PS in RH, not<br>shared by DM | PGSC0003DMG40002<br>7384 | PGSC0003DMT4000<br>70437 |       |     |     |                                                                                                                                                                                                                               |
| 1941 | Heterozygous<br>PS in RH, not<br>shared by DM | PGSC0003DMG40002<br>7401 | PGSC0003DMT4000<br>70475 | chr04 | NO  | NO  |                                                                                                                                                                                                                               |
| 1942 | Heterozygous<br>PS in RH, not<br>shared by DM | PGSC0003DMG40002<br>7436 | PGSC0003DMT4000<br>70587 | chr06 | yes | yes |                                                                                                                                                                                                                               |
| 1943 | Heterozygous<br>PS in RH, not<br>shared by DM | PGSC0003DMG40002<br>7447 | PGSC0003DMT4000<br>70609 | chr12 | NO  | NO  |                                                                                                                                                                                                                               |
| 1944 | Heterozygous<br>PS in RH, not<br>shared by DM | PGSC0003DMG40002<br>7464 | PGSC0003DMT4000<br>70649 | chr05 | NO  | NO  |                                                                                                                                                                                                                               |
| 1945 | Heterozygous<br>PS in RH, not<br>shared by DM | PGSC0003DMG40102<br>7501 | PGSC0003DMT4000<br>70728 | -     | yes | NO  |                                                                                                                                                                                                                               |
| 1946 | Heterozygous<br>PS in RH, not<br>shared by DM | PGSC0003DMG40002<br>7520 | PGSC0003DMT4000<br>70780 | chr01 | NO  | NO  |                                                                                                                                                                                                                               |
| 1947 | Heterozygous<br>PS in RH, not<br>shared by DM | PGSC0003DMG40002<br>7539 | PGSC0003DMT4000<br>70823 | chr02 | yes | NO  |                                                                                                                                                                                                                               |
| 1948 | Heterozygous<br>PS in RH, not<br>shared by DM | PGSC0003DMG40002<br>7540 | PGSC0003DMT4000<br>70825 | chr01 | yes | yes | GO:0005524; ATP binding; Molecular<br>Function GO:0006915; apoptosis;<br>Biological Process                                                                                                                                   |

|      |                                               |                          |                          |       |     |     |                                                                                                                                                                                                                        |
|------|-----------------------------------------------|--------------------------|--------------------------|-------|-----|-----|------------------------------------------------------------------------------------------------------------------------------------------------------------------------------------------------------------------------|
| 1949 | Heterozygous<br>PS in RH, not<br>shared by DM | PGSC0003DMG40202<br>7687 | PGSC0003DMT4000<br>71195 | chr12 | yes | yes | GO:0003700; transcription factor activity;<br>Molecular Function GO:0006355;<br>regulation of transcription, DNA-<br>dependent; Biological Process<br>GO:0043565; sequence-specific DNA<br>binding; Molecular Function |
| 1950 | Heterozygous<br>PS in RH, not<br>shared by DM | PGSC0003DMG40002<br>7710 | PGSC0003DMT4000<br>71263 | chr02 | NO  | NO  |                                                                                                                                                                                                                        |
| 1951 | Heterozygous<br>PS in RH, not<br>shared by DM | PGSC0003DMG40002<br>7758 | PGSC0003DMT4000<br>71348 | chr03 | NO  | NO  |                                                                                                                                                                                                                        |
| 1952 | Heterozygous<br>PS in RH, not<br>shared by DM | PGSC0003DMG40002<br>7789 | PGSC0003DMT4000<br>71421 | chr10 | yes | yes | GO:0004871; signal transducer activity;<br>Molecular Function GO:0005515; protein<br>binding; Molecular Function<br>GO:0009416; response to light stimulus;<br>Biological Process                                      |
| 1953 | Heterozygous<br>PS in RH, not<br>shared by DM | PGSC0003DMG40002<br>7867 | PGSC0003DMT4000<br>71638 | chr08 | NO  | NO  | GO:0004672; protein kinase activity;<br>Molecular Function GO:0005524; ATP<br>binding; Molecular Function<br>GO:0006468; protein amino acid<br>phosphorylation; Biological Process                                     |
| 1954 | Heterozygous<br>PS in RH, not<br>shared by DM | PGSC0003DMG40002<br>7950 | PGSC0003DMT4000<br>71840 | chr08 | yes | NO  | GO:0003676; nucleic acid binding;<br>Molecular Function GO:0005622;<br>intracellular; Cellular Component                                                                                                               |
| 1955 | Heterozygous<br>PS in RH, not<br>shared by DM | PGSC0003DMG40002<br>7956 | PGSC0003DMT4000<br>71854 | chr10 | NO  | NO  |                                                                                                                                                                                                                        |
| 1956 | Heterozygous<br>PS in RH, not<br>shared by DM | PGSC0003DMG40002<br>7966 | PGSC0003DMT4000<br>71871 | chr09 | yes | NO  | GO:0016491; oxidoreductase activity;<br>Molecular Function                                                                                                                                                             |
| 1957 | Heterozygous<br>PS in RH, not<br>shared by DM | PGSC0003DMG40002<br>7971 | PGSC0003DMT4000<br>71897 | -     | NO  | NO  |                                                                                                                                                                                                                        |
| 1958 | Heterozygous<br>PS in RH, not<br>shared by DM | PGSC0003DMG40002<br>8072 | PGSC0003DMT4000<br>72141 | chr11 | NO  | NO  | GO:0005524; ATP binding; Molecular<br>Function                                                                                                                                                                         |

|      |                                               |                          |                          |       |     |     |                                                                                                            |
|------|-----------------------------------------------|--------------------------|--------------------------|-------|-----|-----|------------------------------------------------------------------------------------------------------------|
| 1959 | Heterozygous<br>PS in RH, not<br>shared by DM | PGSC0003DMG40002<br>8085 | PGSC0003DMT4000<br>72173 | chr02 | yes | yes | GO:0008152; metabolic process;<br>Biological Process GO:0016597; amino<br>acid binding; Molecular Function |
| 1960 | Heterozygous<br>PS in RH, not<br>shared by DM | PGSC0003DMG40202<br>8118 | PGSC0003DMT4000<br>72255 | chr08 | yes | yes |                                                                                                            |
| 1961 | Heterozygous<br>PS in RH, not<br>shared by DM | PGSC0003DMG40102<br>8133 | PGSC0003DMT4000<br>72292 | -     | NO  | NO  |                                                                                                            |
| 1962 | Heterozygous<br>PS in RH, not<br>shared by DM | PGSC0003DMG40002<br>8156 | PGSC0003DMT4000<br>72349 | chr10 | NO  | NO  |                                                                                                            |
| 1963 | Heterozygous<br>PS in RH, not<br>shared by DM | PGSC0003DMG40002<br>8221 | PGSC0003DMT4000<br>72533 | chr06 | NO  | NO  | GO:0005515; protein binding; Molecular<br>Function                                                         |
| 1964 | Heterozygous<br>PS in RH, not<br>shared by DM | PGSC0003DMG40202<br>8232 | PGSC0003DMT4000<br>72559 | chr01 | yes | NO  |                                                                                                            |
| 1965 | Heterozygous<br>PS in RH, not<br>shared by DM | PGSC0003DMG40002<br>8241 | PGSC0003DMT4000<br>72574 | chr10 | NO  | NO  |                                                                                                            |
| 1966 | Heterozygous<br>PS in RH, not<br>shared by DM | PGSC0003DMG40002<br>8251 | PGSC0003DMT4000<br>72601 | chr02 | yes | NO  |                                                                                                            |
| 1967 | Heterozygous<br>PS in RH, not<br>shared by DM | PGSC0003DMG40002<br>8267 | PGSC0003DMT4000<br>72644 | -     | yes | NO  |                                                                                                            |
| 1968 | Heterozygous<br>PS in RH, not<br>shared by DM | PGSC0003DMG40002<br>8271 | PGSC0003DMT4000<br>72655 | chr12 | NO  | NO  |                                                                                                            |
| 1969 | Heterozygous<br>PS in RH, not<br>shared by DM | PGSC0003DMG40002<br>8295 | PGSC0003DMT4000<br>72713 | chr04 | NO  | NO  |                                                                                                            |

|      |                                               |                          |                          |       |     |    |                                                                                                                                                                                                                |
|------|-----------------------------------------------|--------------------------|--------------------------|-------|-----|----|----------------------------------------------------------------------------------------------------------------------------------------------------------------------------------------------------------------|
| 1970 | Heterozygous<br>PS in RH, not<br>shared by DM | PGSC0003DMG40302<br>8300 | PGSC0003DMT4000<br>72720 | -     | yes | NO | GO:0005215; transporter activity;<br>Molecular Function GO:0006810;<br>transport; Biological Process<br>GO:0016020; membrane; Cellular<br>Component GO:0055085; transmembrane<br>transport; Biological Process |
| 1971 | Heterozygous<br>PS in RH, not<br>shared by DM | PGSC0003DMG40002<br>8316 | PGSC0003DMT4000<br>72765 | chr01 | NO  | NO |                                                                                                                                                                                                                |
| 1972 | Heterozygous<br>PS in RH, not<br>shared by DM | PGSC0003DMG40102<br>8328 | PGSC0003DMT4000<br>72809 | chr04 | NO  | NO |                                                                                                                                                                                                                |
| 1973 | Heterozygous<br>PS in RH, not<br>shared by DM | PGSC0003DMG40002<br>8338 | PGSC0003DMT4000<br>72841 | -     | NO  | NO |                                                                                                                                                                                                                |
| 1974 | Heterozygous<br>PS in RH, not<br>shared by DM | PGSC0003DMG40002<br>8339 | PGSC0003DMT4000<br>72845 | chr04 | NO  | NO |                                                                                                                                                                                                                |
| 1975 | Heterozygous<br>PS in RH, not<br>shared by DM | PGSC0003DMG40002<br>8349 | PGSC0003DMT4000<br>72874 | chr07 | yes | NO |                                                                                                                                                                                                                |
| 1976 | Heterozygous<br>PS in RH, not<br>shared by DM | PGSC0003DMG40002<br>8350 | PGSC0003DMT4000<br>72875 | chr09 | NO  | NO |                                                                                                                                                                                                                |
| 1977 | Heterozygous<br>PS in RH, not<br>shared by DM | PGSC0003DMG40002<br>8366 | PGSC0003DMT4000<br>72910 | chr12 | NO  | NO |                                                                                                                                                                                                                |
| 1978 | Heterozygous<br>PS in RH, not<br>shared by DM | PGSC0003DMG40102<br>8370 | PGSC0003DMT4000<br>72923 | chr06 | yes | NO |                                                                                                                                                                                                                |
| 1979 | Heterozygous<br>PS in RH, not<br>shared by DM | PGSC0003DMG40002<br>8373 | PGSC0003DMT4000<br>72928 | chr01 | yes | NO |                                                                                                                                                                                                                |

|      |                                               |                          |                          |       |     |    |                                                                                                                                                                                                        |
|------|-----------------------------------------------|--------------------------|--------------------------|-------|-----|----|--------------------------------------------------------------------------------------------------------------------------------------------------------------------------------------------------------|
| 1980 | Heterozygous<br>PS in RH, not<br>shared by DM | PGSC0003DMG40102<br>8385 | PGSC0003DMT4000<br>72977 | chr09 | yes | NO | GO:0003700; transcription factor activity;<br>Molecular Function GO:0043565;<br>sequence-specific DNA binding;<br>Molecular Function GO:0045449;<br>regulation of transcription; Biological<br>Process |
| 1981 | Heterozygous<br>PS in RH, not<br>shared by DM | PGSC0003DMG40002<br>8405 | PGSC0003DMT4000<br>73019 | chr06 | yes | NO | GO:0009058; biosynthetic process;<br>Biological Process                                                                                                                                                |
| 1982 | Heterozygous<br>PS in RH, not<br>shared by DM | PGSC0003DMG40002<br>8448 | PGSC0003DMT4000<br>73150 | chr07 | yes | NO | GO:0003677; DNA binding; Molecular<br>Function GO:0005634; nucleus; Cellular<br>Component                                                                                                              |
| 1983 | Heterozygous<br>PS in RH, not<br>shared by DM | PGSC0003DMG40002<br>8474 | PGSC0003DMT4000<br>73281 | chr06 | NO  | NO | GO:0008152; metabolic process;<br>Biological Process GO:0016758;<br>transferase activity, transferring hexosyl<br>groups; Molecular Function                                                           |
| 1984 | Heterozygous<br>PS in RH, not<br>shared by DM | PGSC0003DMG40002<br>8493 | PGSC0003DMT4000<br>73320 | chr10 | NO  | NO | GO:0004672; protein kinase activity;<br>Molecular Function GO:0005524; ATP<br>binding; Molecular Function<br>GO:0006468; protein amino acid<br>phosphorylation; Biological Process                     |
| 1985 | Heterozygous<br>PS in RH, not<br>shared by DM | PGSC0003DMG40002<br>8505 | PGSC0003DMT4000<br>73342 | chr12 | NO  | NO |                                                                                                                                                                                                        |
| 1986 | Heterozygous<br>PS in RH, not<br>shared by DM | PGSC0003DMG40102<br>8565 | PGSC0003DMT4000<br>73530 | chr05 | yes | NO |                                                                                                                                                                                                        |
| 1987 | Heterozygous<br>PS in RH, not<br>shared by DM | PGSC0003DMG40202<br>8577 | PGSC0003DMT4000<br>73573 | chr10 | NO  | NO |                                                                                                                                                                                                        |
| 1988 | Heterozygous<br>PS in RH, not<br>shared by DM | PGSC0003DMG40002<br>8653 | PGSC0003DMT4000<br>73754 | -     | yes | NO |                                                                                                                                                                                                        |
| 1989 | Heterozygous<br>PS in RH, not<br>shared by DM | PGSC0003DMG40202<br>8683 | PGSC0003DMT4000<br>73827 | chr05 | yes | NO |                                                                                                                                                                                                        |

|      |                                               |                          |                          |       |     |     |                                                                                                                                                                                                                                                                                        |
|------|-----------------------------------------------|--------------------------|--------------------------|-------|-----|-----|----------------------------------------------------------------------------------------------------------------------------------------------------------------------------------------------------------------------------------------------------------------------------------------|
| 1990 | Heterozygous<br>PS in RH, not<br>shared by DM | PGSC0003DMG40002<br>8706 | PGSC0003DMT4000<br>73876 | chr01 | yes | NO  |                                                                                                                                                                                                                                                                                        |
| 1991 | Heterozygous<br>PS in RH, not<br>shared by DM | PGSC0003DMG40102<br>8714 | PGSC0003DMT4000<br>73897 | chr01 | yes | NO  | GO:0004672; protein kinase activity;<br>Molecular Function GO:0005524; ATP<br>binding; Molecular Function<br>GO:0006468; protein amino acid<br>phosphorylation; Biological Process                                                                                                     |
| 1992 | Heterozygous<br>PS in RH, not<br>shared by DM | PGSC0003DMG40002<br>8732 | PGSC0003DMT4000<br>73939 | chr06 | yes | yes |                                                                                                                                                                                                                                                                                        |
| 1993 | Heterozygous<br>PS in RH, not<br>shared by DM | PGSC0003DMG40002<br>8768 | PGSC0003DMT4000<br>74009 | chr01 | yes | NO  |                                                                                                                                                                                                                                                                                        |
| 1994 | Heterozygous<br>PS in RH, not<br>shared by DM | PGSC0003DMG40202<br>8796 | PGSC0003DMT4000<br>74096 | chr01 | yes | NO  | GO:0005975; carbohydrate metabolic<br>process; Biological Process GO:0042578;<br>phosphoric ester hydrolase activity;<br>Molecular Function                                                                                                                                            |
| 1995 | Heterozygous<br>PS in RH, not<br>shared by DM | PGSC0003DMG40002<br>8804 | PGSC0003DMT4000<br>74108 | chr04 | yes | NO  | GO:0004497; monooxygenase activity;<br>Molecular Function GO:0005506; iron ion<br>binding; Molecular Function<br>GO:0009055; electron carrier activity;<br>Molecular Function GO:0020037; heme<br>binding; Molecular Function<br>GO:0016787; hydrolase activity;<br>Molecular Function |
| 1996 | Heterozygous<br>PS in RH, not<br>shared by DM | PGSC0003DMG40002<br>8808 | PGSC0003DMT4000<br>74117 | chr08 | yes | NO  |                                                                                                                                                                                                                                                                                        |
| 1997 | Heterozygous<br>PS in RH, not<br>shared by DM | PGSC0003DMG40002<br>8825 | PGSC0003DMT4000<br>74161 | chr11 | NO  | NO  |                                                                                                                                                                                                                                                                                        |
| 1998 | Heterozygous<br>PS in RH, not<br>shared by DM | PGSC0003DMG40102<br>8829 | PGSC0003DMT4000<br>74177 | chr10 | yes | yes |                                                                                                                                                                                                                                                                                        |
| 1999 | Heterozygous<br>PS in RH, not<br>shared by DM | PGSC0003DMG40002<br>8833 | PGSC0003DMT4000<br>74187 | -     | NO  | NO  |                                                                                                                                                                                                                                                                                        |

|      |                                               |                          |                          |       |     |     |                                                                                                                       |
|------|-----------------------------------------------|--------------------------|--------------------------|-------|-----|-----|-----------------------------------------------------------------------------------------------------------------------|
| 2000 | Heterozygous<br>PS in RH, not<br>shared by DM | PGSC0003DMG40002<br>8846 | PGSC0003DMT4000<br>74230 | chr05 | NO  | NO  |                                                                                                                       |
| 2001 | Heterozygous<br>PS in RH, not<br>shared by DM | PGSC0003DMG40002<br>8873 | PGSC0003DMT4000<br>74290 | chr11 | yes | yes |                                                                                                                       |
| 2002 | Heterozygous<br>PS in RH, not<br>shared by DM | PGSC0003DMG40002<br>8893 | PGSC0003DMT4000<br>74333 | chr11 | NO  | NO  |                                                                                                                       |
| 2003 | Heterozygous<br>PS in RH, not<br>shared by DM | PGSC0003DMG40002<br>8912 | PGSC0003DMT4000<br>74393 | chr07 | NO  | NO  |                                                                                                                       |
| 2004 | Heterozygous<br>PS in RH, not<br>shared by DM | PGSC0003DMG40002<br>9069 | PGSC0003DMT4000<br>74755 | chr11 | NO  | NO  |                                                                                                                       |
| 2005 | Heterozygous<br>PS in RH, not<br>shared by DM | PGSC0003DMG40002<br>9141 | PGSC0003DMT4000<br>74927 | chr09 | NO  | NO  |                                                                                                                       |
| 2006 | Heterozygous<br>PS in RH, not<br>shared by DM | PGSC0003DMG40002<br>9160 | PGSC0003DMT4000<br>74970 | chr12 | NO  | NO  |                                                                                                                       |
| 2007 | Heterozygous<br>PS in RH, not<br>shared by DM | PGSC0003DMG40002<br>9192 | PGSC0003DMT4000<br>75052 | chr06 | yes | NO  | GO:0008152; metabolic process;<br>Biological Process GO:0008168;<br>methyltransferase activity; Molecular<br>Function |
| 2008 | Heterozygous<br>PS in RH, not<br>shared by DM | PGSC0003DMG40002<br>9193 | PGSC0003DMT4000<br>75055 | chr04 | NO  | NO  |                                                                                                                       |
| 2009 | Heterozygous<br>PS in RH, not<br>shared by DM | PGSC0003DMG40102<br>9202 | PGSC0003DMT4000<br>75073 | chr09 | yes | NO  |                                                                                                                       |
| 2010 | Heterozygous<br>PS in RH, not<br>shared by DM | PGSC0003DMG40202<br>9202 | PGSC0003DMT4000<br>75074 | chr02 | yes | NO  |                                                                                                                       |
| 2011 | Heterozygous<br>PS in RH, not<br>shared by DM | PGSC0003DMG40002<br>9218 | PGSC0003DMT4000<br>75117 | chr11 | yes | NO  |                                                                                                                       |



|      |                                               |                          |                          |       |     |     |                                                                                                                                                                                                              |
|------|-----------------------------------------------|--------------------------|--------------------------|-------|-----|-----|--------------------------------------------------------------------------------------------------------------------------------------------------------------------------------------------------------------|
| 2012 | Heterozygous<br>PS in RH, not<br>shared by DM | PGSC0003DMG40002<br>9220 | PGSC0003DMT4000<br>75120 | -     | NO  | NO  |                                                                                                                                                                                                              |
| 2013 | Heterozygous<br>PS in RH, not<br>shared by DM | PGSC0003DMG40002<br>9229 | PGSC0003DMT4000<br>75135 | chr08 | yes | NO  | GO:0003676; nucleic acid binding;<br>Molecular Function GO:0003950; NAD+<br>ADP-ribosyltransferase activity;<br>Molecular Function GO:0006471; protein<br>amino acid ADP-ribosylation; Biological<br>Process |
| 2014 | Heterozygous<br>PS in RH, not<br>shared by DM | PGSC0003DMG40002<br>9282 | PGSC0003DMT4000<br>75285 | -     | NO  | NO  |                                                                                                                                                                                                              |
| 2015 | Heterozygous<br>PS in RH, not<br>shared by DM | PGSC0003DMG40002<br>9301 | PGSC0003DMT4000<br>75342 | chr11 | yes | yes |                                                                                                                                                                                                              |
| 2016 | Heterozygous<br>PS in RH, not<br>shared by DM | PGSC0003DMG40002<br>9342 | PGSC0003DMT4000<br>75431 | chr08 | yes | NO  |                                                                                                                                                                                                              |
| 2017 | Heterozygous<br>PS in RH, not<br>shared by DM | PGSC0003DMG40102<br>9345 | PGSC0003DMT4000<br>75441 | chr12 | yes | NO  | GO:0005737; cytoplasm; Cellular<br>Component GO:0006364; rRNA<br>processing; Biological Process<br>GO:0008168; methyltransferase activity;<br>Molecular Function                                             |
| 2018 | Heterozygous<br>PS in RH, not<br>shared by DM | PGSC0003DMG40002<br>9360 | PGSC0003DMT4000<br>75504 | chr06 | yes | NO  | GO:0006807; nitrogen compound<br>metabolic process; Biological Process<br>GO:0016810; hydrolase activity, acting on<br>carbon-nitrogen (but not peptide) bonds;<br>Molecular Function                        |
| 2019 | Heterozygous<br>PS in RH, not<br>shared by DM | PGSC0003DMG40002<br>9382 | PGSC0003DMT4000<br>75558 | chr12 | NO  | NO  |                                                                                                                                                                                                              |
| 2020 | Heterozygous<br>PS in RH, not<br>shared by DM | PGSC0003DMG40002<br>9415 | PGSC0003DMT4000<br>75625 | chr05 | NO  | NO  |                                                                                                                                                                                                              |
| 2021 | Heterozygous<br>PS in RH, not<br>shared by DM | PGSC0003DMG40002<br>9504 | PGSC0003DMT4000<br>75881 | -     | yes | yes |                                                                                                                                                                                                              |

|      |                                               |                          |                          |       |     |     |                                                                                                                                                                 |
|------|-----------------------------------------------|--------------------------|--------------------------|-------|-----|-----|-----------------------------------------------------------------------------------------------------------------------------------------------------------------|
| 2022 | Heterozygous<br>PS in RH, not<br>shared by DM | PGSC0003DMG40002<br>9592 | PGSC0003DMT4000<br>76100 | chr04 | yes | NO  | GO:0006950; response to stress;<br>Biological Process                                                                                                           |
| 2023 | Heterozygous<br>PS in RH, not<br>shared by DM | PGSC0003DMG40302<br>9595 | PGSC0003DMT4000<br>76108 | chr11 | yes | yes |                                                                                                                                                                 |
| 2024 | Heterozygous<br>PS in RH, not<br>shared by DM | PGSC0003DMG40002<br>9623 | PGSC0003DMT4000<br>76187 |       |     |     |                                                                                                                                                                 |
| 2025 | Heterozygous<br>PS in RH, not<br>shared by DM | PGSC0003DMG40002<br>9638 | PGSC0003DMT4000<br>76240 | chr09 | yes | NO  | GO:0004553; hydrolase activity,<br>hydrolyzing O-glycosyl compounds;<br>Molecular Function GO:0005975;<br>carbohydrate metabolic process;<br>Biological Process |
| 2026 | Heterozygous<br>PS in RH, not<br>shared by DM | PGSC0003DMG40002<br>9644 | PGSC0003DMT4000<br>76250 | chr01 | yes | NO  | GO:0008168; methyltransferase activity;<br>Molecular Function                                                                                                   |
| 2027 | Heterozygous<br>PS in RH, not<br>shared by DM | PGSC0003DMG40002<br>9712 | PGSC0003DMT4000<br>76407 | chr06 | NO  | NO  |                                                                                                                                                                 |
| 2028 | Heterozygous<br>PS in RH, not<br>shared by DM | PGSC0003DMG40002<br>9748 | PGSC0003DMT4000<br>76507 | chr11 | yes | NO  | GO:0031072; heat shock protein binding;<br>Molecular Function                                                                                                   |
| 2029 | Heterozygous<br>PS in RH, not<br>shared by DM | PGSC0003DMG40002<br>9846 | PGSC0003DMT4000<br>76743 | chr11 | yes | NO  |                                                                                                                                                                 |
| 2030 | Heterozygous<br>PS in RH, not<br>shared by DM | PGSC0003DMG40102<br>9918 | PGSC0003DMT4000<br>76918 | chr11 | yes | NO  |                                                                                                                                                                 |
| 2031 | Heterozygous<br>PS in RH, not<br>shared by DM | PGSC0003DMG40002<br>9936 | PGSC0003DMT4000<br>76960 | chr12 | NO  | NO  |                                                                                                                                                                 |

|      |                                               |                          |                          |       |     |     |                                                                                                                                                                                                                                                                                                                                                                                                                                                                                                                                               |
|------|-----------------------------------------------|--------------------------|--------------------------|-------|-----|-----|-----------------------------------------------------------------------------------------------------------------------------------------------------------------------------------------------------------------------------------------------------------------------------------------------------------------------------------------------------------------------------------------------------------------------------------------------------------------------------------------------------------------------------------------------|
| 2032 | Heterozygous<br>PS in RH, not<br>shared by DM | PGSC0003DMG40002<br>9952 | PGSC0003DMT4000<br>77008 | chr03 | yes | yes | GO:0000166; nucleotide binding;<br>Molecular Function GO:0003676; nucleic<br>acid binding; Molecular Function<br>GO:0004812; aminoacyl-tRNA ligase<br>activity; Molecular Function<br>GO:0005524; ATP binding; Molecular<br>Function GO:0005737; cytoplasm;<br>Cellular Component GO:0006412;<br>translation; Biological Process<br>GO:0006418; tRNA aminoacylation for<br>protein translation; Biological Process                                                                                                                            |
| 2033 | Heterozygous<br>PS in RH, not<br>shared by DM | PGSC0003DMG40002<br>9986 | PGSC0003DMT4000<br>77096 | chr09 | NO  | NO  |                                                                                                                                                                                                                                                                                                                                                                                                                                                                                                                                               |
| 2034 | Heterozygous<br>PS in RH, not<br>shared by DM | PGSC0003DMG40002<br>9988 | PGSC0003DMT4000<br>77099 | chr10 | yes | NO  | GO:0004497; monooxygenase activity;<br>Molecular Function GO:0005506; iron ion<br>binding; Molecular Function<br>GO:0009055; electron carrier activity;<br>Molecular Function GO:0020037; heme<br>binding; Molecular Function<br>GO:0003677; DNA binding; Molecular<br>Function GO:0005634; nucleus; Cellular<br>Component GO:0006355; regulation of<br>transcription, DNA-dependent; Biological<br>Process GO:0009725; response to<br>hormone stimulus; Biological Process<br>GO:0045449; regulation of transcription;<br>Biological Process |
| 2035 | Heterozygous<br>PS in RH, not<br>shared by DM | PGSC0003DMG40002<br>9989 | PGSC0003DMT4000<br>77106 | chr09 | yes | yes |                                                                                                                                                                                                                                                                                                                                                                                                                                                                                                                                               |
| 2036 | Heterozygous<br>PS in RH, not<br>shared by DM | PGSC0003DMG40002<br>9994 | PGSC0003DMT4000<br>77126 | chr03 | yes | NO  |                                                                                                                                                                                                                                                                                                                                                                                                                                                                                                                                               |
| 2037 | Heterozygous<br>PS in RH, not<br>shared by DM | PGSC0003DMG40003<br>0038 | PGSC0003DMT4000<br>77231 | chr06 | yes | NO  |                                                                                                                                                                                                                                                                                                                                                                                                                                                                                                                                               |
| 2038 | Heterozygous<br>PS in RH, not<br>shared by DM | PGSC0003DMG40003<br>0041 | PGSC0003DMT4000<br>77234 | chr11 | yes | NO  |                                                                                                                                                                                                                                                                                                                                                                                                                                                                                                                                               |

|      |                                               |                          |                          |       |     |     |                                                                                                                                                                                                                                                                                         |
|------|-----------------------------------------------|--------------------------|--------------------------|-------|-----|-----|-----------------------------------------------------------------------------------------------------------------------------------------------------------------------------------------------------------------------------------------------------------------------------------------|
| 2039 | Heterozygous<br>PS in RH, not<br>shared by DM | PGSC0003DMG40003<br>0049 | PGSC0003DMT4000<br>77254 | chr05 | NO  | NO  | GO:0003700; transcription factor activity;<br>Molecular Function GO:0005634;<br>nucleus; Cellular Component<br>GO:0006355; regulation of transcription,<br>DNA-dependent; Biological Process<br>GO:0043565; sequence-specific DNA<br>binding; Molecular Function                        |
| 2040 | Heterozygous<br>PS in RH, not<br>shared by DM | PGSC0003DMG40003<br>0050 | PGSC0003DMT4000<br>77254 | chr10 | yes | yes | GO:0006855; multidrug transport;<br>Biological Process GO:0015238; drug<br>transporter activity; Molecular Function<br>GO:0015297; antiporter activity;<br>Molecular Function GO:0016020;<br>membrane; Cellular Component<br>GO:0055085; transmembrane transport;<br>Biological Process |
| 2041 | Heterozygous<br>PS in RH, not<br>shared by DM | PGSC0003DMG40103<br>0070 | PGSC0003DMT4000<br>77302 | chr09 | yes | NO  |                                                                                                                                                                                                                                                                                         |
| 2042 | Heterozygous<br>PS in RH, not<br>shared by DM | PGSC0003DMG40003<br>0071 | PGSC0003DMT4000<br>77313 | chr01 | yes | NO  | GO:0003676; nucleic acid binding;<br>Molecular Function                                                                                                                                                                                                                                 |
| 2043 | Heterozygous<br>PS in RH, not<br>shared by DM | PGSC0003DMG40003<br>0072 | PGSC0003DMT4000<br>77321 | chr01 | NO  | NO  |                                                                                                                                                                                                                                                                                         |
| 2044 | Heterozygous<br>PS in RH, not<br>shared by DM | PGSC0003DMG40003<br>0073 | PGSC0003DMT4000<br>77322 | chr12 | yes | NO  |                                                                                                                                                                                                                                                                                         |
| 2045 | Heterozygous<br>PS in RH, not<br>shared by DM | PGSC0003DMG40003<br>0087 | PGSC0003DMT4000<br>77354 | chr03 | NO  | NO  | GO:0008061; chitin binding; Molecular<br>Function                                                                                                                                                                                                                                       |
| 2046 | Heterozygous<br>PS in RH, not<br>shared by DM | PGSC0003DMG40003<br>0098 | PGSC0003DMT4000<br>77375 | chr11 | yes | NO  |                                                                                                                                                                                                                                                                                         |
| 2047 | Heterozygous<br>PS in RH, not<br>shared by DM | PGSC0003DMG40003<br>0103 | PGSC0003DMT4000<br>77390 | chr02 | yes | NO  |                                                                                                                                                                                                                                                                                         |

|      |                                               |                          |                          |       |     |     |                                                                                                                                                                                                                       |
|------|-----------------------------------------------|--------------------------|--------------------------|-------|-----|-----|-----------------------------------------------------------------------------------------------------------------------------------------------------------------------------------------------------------------------|
| 2048 | Heterozygous<br>PS in RH, not<br>shared by DM | PGSC0003DMG40003<br>0167 | PGSC0003DMT4000<br>77570 | chr07 | yes | NO  |                                                                                                                                                                                                                       |
| 2049 | Heterozygous<br>PS in RH, not<br>shared by DM | PGSC0003DMG40003<br>0174 | PGSC0003DMT4000<br>77583 | chr06 | yes | NO  | GO:0008152; metabolic process;<br>Biological Process GO:0016491;<br>oxidoreductase activity; Molecular<br>Function                                                                                                    |
| 2050 | Heterozygous<br>PS in RH, not<br>shared by DM | PGSC0003DMG40003<br>0216 | PGSC0003DMT4000<br>77655 | -     | yes | NO  | GO:0005737; cytoplasm; Cellular<br>Component GO:0016788; hydrolase<br>activity, acting on ester bonds; Molecular<br>Function GO:0019478; D-amino acid<br>catabolic process; Biological Process                        |
| 2051 | Heterozygous<br>PS in RH, not<br>shared by DM | PGSC0003DMG40103<br>0227 | PGSC0003DMT4000<br>77696 | -     | yes | yes |                                                                                                                                                                                                                       |
| 2052 | Heterozygous<br>PS in RH, not<br>shared by DM | PGSC0003DMG40003<br>0280 | PGSC0003DMT4000<br>77840 | chr07 | NO  | NO  |                                                                                                                                                                                                                       |
| 2053 | Heterozygous<br>PS in RH, not<br>shared by DM | PGSC0003DMG40003<br>0282 | PGSC0003DMT4000<br>77845 | chr01 | yes | yes |                                                                                                                                                                                                                       |
| 2054 | Heterozygous<br>PS in RH, not<br>shared by DM | PGSC0003DMG40003<br>0290 | PGSC0003DMT4000<br>77862 | chr08 | NO  | NO  |                                                                                                                                                                                                                       |
| 2055 | Heterozygous<br>PS in RH, not<br>shared by DM | PGSC0003DMG40003<br>0291 | PGSC0003DMT4000<br>77864 | chr08 | yes | yes | GO:0005515; protein binding; Molecular<br>Function GO:0005524; ATP binding;<br>Molecular Function GO:0006915;<br>apoptosis; Biological Process                                                                        |
| 2056 | Heterozygous<br>PS in RH, not<br>shared by DM | PGSC0003DMG40003<br>0335 | PGSC0003DMT4000<br>77996 | chr02 | yes | yes |                                                                                                                                                                                                                       |
| 2057 | Heterozygous<br>PS in RH, not<br>shared by DM | PGSC0003DMG40003<br>0336 | PGSC0003DMT4000<br>78001 | chr04 | yes | NO  | GO:0009058; biosynthetic process;<br>Biological Process GO:0016769;<br>transferase activity, transferring<br>nitrogenous groups; Molecular Function<br>GO:0030170; pyridoxal phosphate<br>binding; Molecular Function |

|      |                                               |                          |                          |       |     |     |                                                                                                                                                                                                                                                                                                                                                                                                                                                                                                                                                              |
|------|-----------------------------------------------|--------------------------|--------------------------|-------|-----|-----|--------------------------------------------------------------------------------------------------------------------------------------------------------------------------------------------------------------------------------------------------------------------------------------------------------------------------------------------------------------------------------------------------------------------------------------------------------------------------------------------------------------------------------------------------------------|
| 2058 | Heterozygous<br>PS in RH, not<br>shared by DM | PGSC0003DMG40003<br>0434 | PGSC0003DMT4000<br>78213 | chr08 | NO  | NO  | GO:0004497; monooxygenase activity;<br>Molecular Function GO:0005506; iron ion<br>binding; Molecular Function<br>GO:0009055; electron carrier activity;<br>Molecular Function GO:0020037; heme<br>binding; Molecular Function<br>GO:0005506; iron ion binding; Molecular<br>Function GO:0009055; electron carrier<br>activity; Molecular Function<br>GO:0016021; integral to membrane;<br>Cellular Component GO:0016491;<br>oxidoreductase activity; Molecular<br>Function GO:0050660; FAD binding;<br>Molecular Function                                    |
| 2059 | Heterozygous<br>PS in RH, not<br>shared by DM | PGSC0003DMG40003<br>0465 | PGSC0003DMT4000<br>78274 | chr05 | yes | NO  | GO:0005506; iron ion binding; Molecular<br>Function GO:0009055; electron carrier<br>activity; Molecular Function<br>GO:0016021; integral to membrane;<br>Cellular Component GO:0016491;<br>oxidoreductase activity; Molecular<br>Function GO:0050660; FAD binding;<br>Molecular Function                                                                                                                                                                                                                                                                     |
| 2060 | Heterozygous<br>PS in RH, not<br>shared by DM | PGSC0003DMG40003<br>0471 | PGSC0003DMT4000<br>78293 | chr12 | yes | yes |                                                                                                                                                                                                                                                                                                                                                                                                                                                                                                                                                              |
| 2061 | Heterozygous<br>PS in RH, not<br>shared by DM | PGSC0003DMG40203<br>0499 | PGSC0003DMT4000<br>78339 | chr08 | yes | NO  |                                                                                                                                                                                                                                                                                                                                                                                                                                                                                                                                                              |
| 2062 | Heterozygous<br>PS in RH, not<br>shared by DM | PGSC0003DMG40003<br>0510 | PGSC0003DMT4000<br>78360 | chr05 | yes | NO  | GO:0005507; copper ion binding;<br>Molecular Function GO:0016491;<br>oxidoreductase activity; Molecular<br>Function GO:0055114; oxidation<br>reduction; Biological Process<br>GO:0005524; ATP binding; Molecular<br>Function GO:0006810; transport;<br>Biological Process GO:0016021; integral<br>to membrane; Cellular Component<br>GO:0016887; ATPase activity; Molecular<br>Function GO:0042626; ATPase activity,<br>coupled to transmembrane movement of<br>substances; Molecular Function<br>GO:0055085; transmembrane transport;<br>Biological Process |
| 2063 | Heterozygous<br>PS in RH, not<br>shared by DM | PGSC0003DMG40103<br>0515 | PGSC0003DMT4000<br>78371 | chr06 | yes | NO  | GO:0005524; ATP binding; Molecular<br>Function GO:0006810; transport;<br>Biological Process GO:0016021; integral<br>to membrane; Cellular Component<br>GO:0016887; ATPase activity; Molecular<br>Function GO:0042626; ATPase activity,<br>coupled to transmembrane movement of<br>substances; Molecular Function<br>GO:0055085; transmembrane transport;<br>Biological Process                                                                                                                                                                               |
| 2064 | Heterozygous<br>PS in RH, not<br>shared by DM | PGSC0003DMG40203<br>0517 | PGSC0003DMT4000<br>78381 | chr12 | NO  | NO  |                                                                                                                                                                                                                                                                                                                                                                                                                                                                                                                                                              |

|      |                                               |                          |                          |       |     |     |                                                                                                                                                                                                                                             |
|------|-----------------------------------------------|--------------------------|--------------------------|-------|-----|-----|---------------------------------------------------------------------------------------------------------------------------------------------------------------------------------------------------------------------------------------------|
| 2065 | Heterozygous<br>PS in RH, not<br>shared by DM | PGSC0003DMG40003<br>0522 | PGSC0003DMT4000<br>78400 | chr02 | yes | NO  |                                                                                                                                                                                                                                             |
| 2066 | Heterozygous<br>PS in RH, not<br>shared by DM | PGSC0003DMG40003<br>0533 | PGSC0003DMT4000<br>78441 | chr01 | yes | NO  |                                                                                                                                                                                                                                             |
| 2067 | Heterozygous<br>PS in RH, not<br>shared by DM | PGSC0003DMG40003<br>0538 | PGSC0003DMT4000<br>78455 | chr02 | yes | yes | GO:0004672; protein kinase activity;<br>Molecular Function GO:0005515; protein<br>binding; Molecular Function<br>GO:0005524; ATP binding; Molecular<br>Function GO:0006468; protein amino acid<br>phosphorylation; Biological Process       |
| 2068 | Heterozygous<br>PS in RH, not<br>shared by DM | PGSC0003DMG40003<br>0542 | PGSC0003DMT4000<br>78463 | chr07 | NO  | NO  |                                                                                                                                                                                                                                             |
| 2069 | Heterozygous<br>PS in RH, not<br>shared by DM | PGSC0003DMG40003<br>0551 | PGSC0003DMT4000<br>78485 | chr07 | NO  | NO  |                                                                                                                                                                                                                                             |
| 2070 | Heterozygous<br>PS in RH, not<br>shared by DM | PGSC0003DMG40003<br>0594 | PGSC0003DMT4000<br>78610 | chr09 | yes | NO  |                                                                                                                                                                                                                                             |
| 2071 | Heterozygous<br>PS in RH, not<br>shared by DM | PGSC0003DMG40003<br>0618 | PGSC0003DMT4000<br>78678 | chr10 | yes | NO  | GO:0005643; nuclear pore; Cellular<br>Component GO:0006810; transport;<br>Biological Process                                                                                                                                                |
| 2072 | Heterozygous<br>PS in RH, not<br>shared by DM | PGSC0003DMG40003<br>0636 | PGSC0003DMT4000<br>78748 | chr04 | yes | NO  |                                                                                                                                                                                                                                             |
| 2073 | Heterozygous<br>PS in RH, not<br>shared by DM | PGSC0003DMG40003<br>0740 | PGSC0003DMT4000<br>78996 | chr06 | yes | yes | GO:0005524; ATP binding; Molecular<br>Function                                                                                                                                                                                              |
| 2074 | Heterozygous<br>PS in RH, not<br>shared by DM | PGSC0003DMG40003<br>0745 | PGSC0003DMT4000<br>79001 | chr08 | yes | NO  | GO:0003824; catalytic activity; Molecular<br>Function GO:0006631; fatty acid<br>metabolic process; Biological Process<br>GO:0008152; metabolic process;<br>Biological Process GO:0016491;<br>oxidoreductase activity; Molecular<br>Function |

|      |                                               |                          |                          |       |     |     |                                                                                                                                                                                                        |
|------|-----------------------------------------------|--------------------------|--------------------------|-------|-----|-----|--------------------------------------------------------------------------------------------------------------------------------------------------------------------------------------------------------|
| 2075 | Heterozygous<br>PS in RH, not<br>shared by DM | PGSC0003DMG40003<br>0803 | PGSC0003DMT4000<br>79144 | chr04 | yes | NO  | GO:0009507; chloroplast; Cellular<br>Component GO:0046422; violaxanthin de-<br>epoxidase activity; Molecular Function<br>GO:0055114; oxidation reduction;<br>Biological Process                        |
| 2076 | Heterozygous<br>PS in RH, not<br>shared by DM | PGSC0003DMG40003<br>0806 | PGSC0003DMT4000<br>79154 | chr06 | NO  | NO  |                                                                                                                                                                                                        |
| 2077 | Heterozygous<br>PS in RH, not<br>shared by DM | PGSC0003DMG40103<br>0822 | PGSC0003DMT4000<br>79197 | chr08 | yes | yes |                                                                                                                                                                                                        |
| 2078 | Heterozygous<br>PS in RH, not<br>shared by DM | PGSC0003DMG40003<br>0823 | PGSC0003DMT4000<br>79201 | chr04 | yes | NO  |                                                                                                                                                                                                        |
| 2079 | Heterozygous<br>PS in RH, not<br>shared by DM | PGSC0003DMG40103<br>0883 | PGSC0003DMT4000<br>79342 | chr04 | NO  | NO  | GO:0009055; electron carrier activity;<br>Molecular Function GO:0015035; protein<br>disulfide oxidoreductase activity;<br>Molecular Function GO:0045454; cell<br>redox homeostasis; Biological Process |
| 2080 | Heterozygous<br>PS in RH, not<br>shared by DM | PGSC0003DMG40003<br>0906 | PGSC0003DMT4000<br>79395 | chr03 | yes | NO  |                                                                                                                                                                                                        |
| 2081 | Heterozygous<br>PS in RH, not<br>shared by DM | PGSC0003DMG40003<br>0918 | PGSC0003DMT4000<br>79424 | chr07 | yes | yes | GO:0008152; metabolic process;<br>Biological Process GO:0016491;<br>oxidoreductase activity; Molecular<br>Function                                                                                     |
| 2082 | Heterozygous<br>PS in RH, not<br>shared by DM | PGSC0003DMG40003<br>1000 | PGSC0003DMT4000<br>79611 | chr03 | yes | yes |                                                                                                                                                                                                        |
| 2083 | Heterozygous<br>PS in RH, not<br>shared by DM | PGSC0003DMG40003<br>1005 | PGSC0003DMT4000<br>79617 | chr04 | yes | NO  |                                                                                                                                                                                                        |
| 2084 | Heterozygous<br>PS in RH, not<br>shared by DM | PGSC0003DMG40103<br>1036 | PGSC0003DMT4000<br>79684 | -     | yes | NO  |                                                                                                                                                                                                        |



|      |                                               |                          |                          |       |     |     |                                                                                                                                                                 |
|------|-----------------------------------------------|--------------------------|--------------------------|-------|-----|-----|-----------------------------------------------------------------------------------------------------------------------------------------------------------------|
| 2085 | Heterozygous<br>PS in RH, not<br>shared by DM | PGSC0003DMG40203<br>1036 | PGSC0003DMT4000<br>79683 | chr11 | NO  | NO  | GO:0004553; hydrolase activity,<br>hydrolyzing O-glycosyl compounds;<br>Molecular Function GO:0005975;<br>carbohydrate metabolic process;<br>Biological Process |
| 2086 | Heterozygous<br>PS in RH, not<br>shared by DM | PGSC0003DMG40003<br>1039 | PGSC0003DMT4000<br>79690 | -     | NO  | NO  |                                                                                                                                                                 |
| 2087 | Heterozygous<br>PS in RH, not<br>shared by DM | PGSC0003DMG40003<br>1087 | PGSC0003DMT4000<br>79832 | chr04 | NO  | NO  |                                                                                                                                                                 |
| 2088 | Heterozygous<br>PS in RH, not<br>shared by DM | PGSC0003DMG40103<br>1089 | PGSC0003DMT4000<br>79836 | chr07 | yes | NO  |                                                                                                                                                                 |
| 2089 | Heterozygous<br>PS in RH, not<br>shared by DM | PGSC0003DMG40003<br>1091 | PGSC0003DMT4000<br>79839 | -     | NO  | NO  |                                                                                                                                                                 |
| 2090 | Heterozygous<br>PS in RH, not<br>shared by DM | PGSC0003DMG40003<br>1137 | PGSC0003DMT4000<br>79969 | chr02 | yes | NO  |                                                                                                                                                                 |
| 2091 | Heterozygous<br>PS in RH, not<br>shared by DM | PGSC0003DMG40003<br>1153 | PGSC0003DMT4000<br>80005 | chr09 | NO  | NO  |                                                                                                                                                                 |
| 2092 | Heterozygous<br>PS in RH, not<br>shared by DM | PGSC0003DMG40003<br>1173 | PGSC0003DMT4000<br>80060 | chr07 | NO  | NO  | GO:0003676; nucleic acid binding;<br>Molecular Function GO:0008270; zinc ion<br>binding; Molecular Function                                                     |
| 2093 | Heterozygous<br>PS in RH, not<br>shared by DM | PGSC0003DMG40003<br>1184 | PGSC0003DMT4000<br>80083 | chr08 | yes | yes |                                                                                                                                                                 |
| 2094 | Heterozygous<br>PS in RH, not<br>shared by DM | PGSC0003DMG40003<br>1185 | PGSC0003DMT4000<br>80085 | chr09 | NO  | NO  |                                                                                                                                                                 |
| 2095 | Heterozygous<br>PS in RH, not<br>shared by DM | PGSC0003DMG40003<br>1208 | PGSC0003DMT4000<br>80173 | chr12 | NO  | NO  |                                                                                                                                                                 |
| 2096 | Heterozygous<br>PS in RH, not<br>shared by DM | PGSC0003DMG40103<br>1260 | PGSC0003DMT4000<br>80293 | chr05 | yes | yes |                                                                                                                                                                 |

|      |                                               |                          |                          |       |     |    |                                                                                                                                                                  |
|------|-----------------------------------------------|--------------------------|--------------------------|-------|-----|----|------------------------------------------------------------------------------------------------------------------------------------------------------------------|
| 2097 | Heterozygous<br>PS in RH, not<br>shared by DM | PGSC0003DMG40003<br>1271 | PGSC0003DMT4000<br>80327 | chr07 | yes | NO | GO:0016787; hydrolase activity;<br>Molecular Function                                                                                                            |
| 2098 | Heterozygous<br>PS in RH, not<br>shared by DM | PGSC0003DMG40003<br>1292 | PGSC0003DMT4000<br>80369 | chr02 | NO  | NO |                                                                                                                                                                  |
| 2099 | Heterozygous<br>PS in RH, not<br>shared by DM | PGSC0003DMG40003<br>1301 | PGSC0003DMT4000<br>80384 | -     | NO  | NO |                                                                                                                                                                  |
| 2100 | Heterozygous<br>PS in RH, not<br>shared by DM | PGSC0003DMG40003<br>1304 | PGSC0003DMT4000<br>80391 | chr10 | NO  | NO |                                                                                                                                                                  |
| 2101 | Heterozygous<br>PS in RH, not<br>shared by DM | PGSC0003DMG40003<br>1306 | PGSC0003DMT4000<br>80398 | chr12 | yes | NO |                                                                                                                                                                  |
| 2102 | Heterozygous<br>PS in RH, not<br>shared by DM | PGSC0003DMG40003<br>1307 | PGSC0003DMT4000<br>80403 | chr03 | yes | NO | GO:0004222; metalloendopeptidase<br>activity; Molecular Function<br>GO:0006508; proteolysis; Biological<br>Process GO:0016020; membrane; Cellular<br>Component   |
| 2103 | Heterozygous<br>PS in RH, not<br>shared by DM | PGSC0003DMG40003<br>1313 | PGSC0003DMT4000<br>80416 | chr07 | NO  | NO |                                                                                                                                                                  |
| 2104 | Heterozygous<br>PS in RH, not<br>shared by DM | PGSC0003DMG40203<br>1319 | PGSC0003DMT4000<br>80442 | chr11 | yes | NO | GO:0005524; ATP binding; Molecular<br>Function GO:0006915; apoptosis;<br>Biological Process                                                                      |
| 2105 | Heterozygous<br>PS in RH, not<br>shared by DM | PGSC0003DMG40003<br>1428 | PGSC0003DMT4000<br>80700 | chr01 | NO  | NO |                                                                                                                                                                  |
| 2106 | Heterozygous<br>PS in RH, not<br>shared by DM | PGSC0003DMG40003<br>1477 | PGSC0003DMT4000<br>80822 | chr05 | yes | NO | GO:0005524; ATP binding; Molecular<br>Function GO:0006915; apoptosis;<br>Biological Process                                                                      |
| 2107 | Heterozygous<br>PS in RH, not<br>shared by DM | PGSC0003DMG40003<br>1491 | PGSC0003DMT4000<br>80864 | chr05 | yes | NO | GO:0005215; transporter activity;<br>Molecular Function GO:0006857;<br>oligopeptide transport; Biological Process<br>GO:0016020; membrane; Cellular<br>Component |

|      |                                               |                          |                          |       |     |    |                                                                                                                                                                                                                                                                  |
|------|-----------------------------------------------|--------------------------|--------------------------|-------|-----|----|------------------------------------------------------------------------------------------------------------------------------------------------------------------------------------------------------------------------------------------------------------------|
| 2108 | Heterozygous<br>PS in RH, not<br>shared by DM | PGSC0003DMG40003<br>1525 | PGSC0003DMT4000<br>80940 | chr06 | yes | NO |                                                                                                                                                                                                                                                                  |
| 2109 | Heterozygous<br>PS in RH, not<br>shared by DM | PGSC0003DMG40003<br>1799 | PGSC0003DMT4000<br>81334 | chr05 | yes | NO | GO:0005524; ATP binding; Molecular<br>Function GO:0006915; apoptosis;<br>Biological Process                                                                                                                                                                      |
| 2110 | Heterozygous<br>PS in RH, not<br>shared by DM | PGSC0003DMG40003<br>1834 | PGSC0003DMT4000<br>81430 | chr01 | NO  | NO | GO:0004221; ubiquitin thiolesterase<br>activity; Molecular Function<br>GO:0005622; intracellular; Cellular<br>Component GO:0006511; ubiquitin-<br>dependent protein catabolic process;<br>Biological Process                                                     |
| 2111 | Heterozygous<br>PS in RH, not<br>shared by DM | PGSC0003DMG40103<br>1907 | PGSC0003DMT4000<br>81529 | chr07 | NO  | NO | GO:0003676; nucleic acid binding;<br>Molecular Function GO:0003677; DNA<br>binding; Molecular Function<br>GO:0004386; helicase activity; Molecular<br>Function GO:0005524; ATP binding;<br>Molecular Function                                                    |
| 2112 | Heterozygous<br>PS in RH, not<br>shared by DM | PGSC0003DMG40003<br>1908 | PGSC0003DMT4000<br>81531 | chr12 | NO  | NO |                                                                                                                                                                                                                                                                  |
| 2113 | Heterozygous<br>PS in RH, not<br>shared by DM | PGSC0003DMG40003<br>2101 | PGSC0003DMT4000<br>81746 | chr10 | yes | NO | GO:0004190; aspartic-type endopeptidase<br>activity; Molecular Function<br>GO:0006508; proteolysis; Biological<br>Process                                                                                                                                        |
| 2114 | Heterozygous<br>PS in RH, not<br>shared by DM | PGSC0003DMG40003<br>2132 | PGSC0003DMT4000<br>81835 | chr05 | NO  | NO |                                                                                                                                                                                                                                                                  |
| 2115 | Heterozygous<br>PS in RH, not<br>shared by DM | PGSC0003DMG40003<br>2151 | PGSC0003DMT4000<br>81902 | chr01 | NO  | NO | GO:0003700; transcription factor activity;<br>Molecular Function GO:0005634;<br>nucleus; Cellular Component<br>GO:0006355; regulation of transcription,<br>DNA-dependent; Biological Process<br>GO:0043565; sequence-specific DNA<br>binding; Molecular Function |

|      |                                               |                          |                          |       |     |     |                                                                                                                                                                                                                                                                                            |
|------|-----------------------------------------------|--------------------------|--------------------------|-------|-----|-----|--------------------------------------------------------------------------------------------------------------------------------------------------------------------------------------------------------------------------------------------------------------------------------------------|
| 2116 | Heterozygous<br>PS in RH, not<br>shared by DM | PGSC0003DMG40003<br>2269 | PGSC0003DMT4000<br>82118 | chr11 | yes | yes | GO:0003824; catalytic activity; Molecular<br>Function GO:0044237; cellular metabolic<br>process; Biological Process GO:0050662;<br>coenzyme binding; Molecular Function                                                                                                                    |
| 2117 | Heterozygous<br>PS in RH, not<br>shared by DM | PGSC0003DMG40003<br>2496 | PGSC0003DMT4000<br>82356 | chr05 | yes | NO  | GO:0004672; protein kinase activity;<br>Molecular Function GO:0005524; ATP<br>binding; Molecular Function<br>GO:0006468; protein amino acid<br>phosphorylation; Biological Process                                                                                                         |
| 2118 | Heterozygous<br>PS in RH, not<br>shared by DM | PGSC0003DMG40003<br>2509 | PGSC0003DMT4000<br>82384 | chr10 | yes | yes |                                                                                                                                                                                                                                                                                            |
| 2119 | Heterozygous<br>PS in RH, not<br>shared by DM | PGSC0003DMG40003<br>2554 | PGSC0003DMT4000<br>82469 | chr09 | NO  | NO  |                                                                                                                                                                                                                                                                                            |
| 2120 | Heterozygous<br>PS in RH, not<br>shared by DM | PGSC0003DMG40003<br>2773 | PGSC0003DMT4000<br>82703 | -     | yes | NO  |                                                                                                                                                                                                                                                                                            |
| 2121 | Heterozygous<br>PS in RH, not<br>shared by DM | PGSC0003DMG40003<br>2781 | PGSC0003DMT4000<br>82722 | chr09 | NO  | NO  |                                                                                                                                                                                                                                                                                            |
| 2122 | Heterozygous<br>PS in RH, not<br>shared by DM | PGSC0003DMG40003<br>2795 | PGSC0003DMT4000<br>82754 | chr12 | NO  | NO  |                                                                                                                                                                                                                                                                                            |
| 2123 | Heterozygous<br>PS in RH, not<br>shared by DM | PGSC0003DMG40003<br>3031 | PGSC0003DMT4000<br>83037 | chr11 | yes | yes |                                                                                                                                                                                                                                                                                            |
| 2124 | Heterozygous<br>PS in RH, not<br>shared by DM | PGSC0003DMG40003<br>3145 | PGSC0003DMT4000<br>83259 | chr05 | NO  | NO  | GO:0003700; transcription factor activity;<br>Molecular Function GO:0006355;<br>regulation of transcription, DNA-<br>dependent; Biological Process<br>GO:0043565; sequence-specific DNA<br>binding; Molecular Function<br>GO:0046983; protein dimerization<br>activity; Molecular Function |

|      |                                               |                          |                          |       |     |     |                                                                                                                                                                                    |
|------|-----------------------------------------------|--------------------------|--------------------------|-------|-----|-----|------------------------------------------------------------------------------------------------------------------------------------------------------------------------------------|
| 2125 | Heterozygous<br>PS in RH, not<br>shared by DM | PGSC0003DMG40003<br>3332 | PGSC0003DMT4000<br>83467 | chr04 | yes | yes | GO:0005507; copper ion binding;<br>Molecular Function GO:0009055; electron<br>carrier activity; Molecular Function                                                                 |
| 2126 | Heterozygous<br>PS in RH, not<br>shared by DM | PGSC0003DMG40003<br>3357 | PGSC0003DMT4000<br>83502 | chr12 | yes | NO  |                                                                                                                                                                                    |
| 2127 | Heterozygous<br>PS in RH, not<br>shared by DM | PGSC0003DMG40003<br>3567 | PGSC0003DMT4000<br>83733 | chr04 | yes | NO  |                                                                                                                                                                                    |
| 2128 | Heterozygous<br>PS in RH, not<br>shared by DM | PGSC0003DMG40103<br>3568 | PGSC0003DMT4000<br>83734 | chr05 | NO  | NO  |                                                                                                                                                                                    |
| 2129 | Heterozygous<br>PS in RH, not<br>shared by DM | PGSC0003DMG40003<br>3583 | PGSC0003DMT4000<br>83785 | chr01 | yes | NO  |                                                                                                                                                                                    |
| 2130 | Heterozygous<br>PS in RH, not<br>shared by DM | PGSC0003DMG40003<br>3664 | PGSC0003DMT4000<br>83937 | chr12 | yes | yes | GO:0004190; aspartic-type endopeptidase<br>activity; Molecular Function<br>GO:0016021; integral to membrane;<br>Cellular Component                                                 |
| 2131 | Heterozygous<br>PS in RH, not<br>shared by DM | PGSC0003DMG40003<br>3681 | PGSC0003DMT4000<br>83956 | chr10 | yes | NO  | GO:0004672; protein kinase activity;<br>Molecular Function GO:0005524; ATP<br>binding; Molecular Function<br>GO:0006468; protein amino acid<br>phosphorylation; Biological Process |
| 2132 | Heterozygous<br>PS in RH, not<br>shared by DM | PGSC0003DMG40003<br>3873 | PGSC0003DMT4000<br>84199 | -     | NO  | NO  |                                                                                                                                                                                    |
| 2133 | Heterozygous<br>PS in RH, not<br>shared by DM | PGSC0003DMG40203<br>3880 | PGSC0003DMT4000<br>84215 | chr01 | yes | NO  |                                                                                                                                                                                    |
| 2134 | Heterozygous<br>PS in RH, not<br>shared by DM | PGSC0003DMG40203<br>3888 | PGSC0003DMT4000<br>84232 | -     | NO  | NO  |                                                                                                                                                                                    |
| 2135 | Heterozygous<br>PS in RH, not<br>shared by DM | PGSC0003DMG40003<br>3913 | PGSC0003DMT4000<br>84286 | chr09 | NO  | NO  |                                                                                                                                                                                    |

|      |                                         |                          |                          |       |     |     |                                                                                                                                                                                                                         |
|------|-----------------------------------------|--------------------------|--------------------------|-------|-----|-----|-------------------------------------------------------------------------------------------------------------------------------------------------------------------------------------------------------------------------|
| 2136 | Heterozygous PS in RH, not shared by DM | PGSC0003DMG40003<br>3933 | PGSC0003DMT4000<br>84315 | chr01 | yes | NO  | GO:0005515; protein binding; Molecular Function                                                                                                                                                                         |
| 2137 | Heterozygous PS in RH, not shared by DM | PGSC0003DMG40003<br>4106 | PGSC0003DMT4000<br>84511 | chr10 | yes | yes |                                                                                                                                                                                                                         |
| 2138 | Heterozygous PS in RH, not shared by DM | PGSC0003DMG40003<br>4328 | PGSC0003DMT4000<br>84757 | chr03 | yes | yes |                                                                                                                                                                                                                         |
| 2139 | Heterozygous PS in RH, not shared by DM | PGSC0003DMG40003<br>4368 | PGSC0003DMT4000<br>84797 | chr04 | yes | NO  | GO:0004222; metalloendopeptidase activity; Molecular Function<br>GO:0006508; proteolysis; Biological Process<br>GO:0008270; zinc ion binding; Molecular Function                                                        |
| 2140 | Heterozygous PS in RH, not shared by DM | PGSC0003DMG40003<br>4436 | PGSC0003DMT4000<br>84865 | chr07 | NO  | NO  |                                                                                                                                                                                                                         |
| 2141 | Heterozygous PS in RH, not shared by DM | PGSC0003DMG40003<br>4442 | PGSC0003DMT4000<br>84871 | chr03 | NO  | NO  |                                                                                                                                                                                                                         |
| 2142 | Heterozygous PS in RH, not shared by DM | PGSC0003DMG40003<br>4453 | PGSC0003DMT4000<br>84882 | chr04 | NO  | NO  |                                                                                                                                                                                                                         |
| 2143 | Heterozygous PS in RH, not shared by DM | PGSC0003DMG40003<br>4467 | PGSC0003DMT4000<br>84896 | chr08 | yes | yes | GO:0005524; ATP binding; Molecular Function<br>GO:0006915; apoptosis; Biological Process                                                                                                                                |
| 2144 | Heterozygous PS in RH, not shared by DM | PGSC0003DMG40003<br>4493 | PGSC0003DMT4000<br>84922 | chr07 | yes | NO  | GO:0004497; monooxygenase activity; Molecular Function<br>GO:0005506; iron ion binding; Molecular Function<br>GO:0009055; electron carrier activity; Molecular Function<br>GO:0020037; heme binding; Molecular Function |
| 2145 | Heterozygous PS in RH, not shared by DM | PGSC0003DMG40003<br>4532 | PGSC0003DMT4000<br>84961 | chr06 | NO  | NO  |                                                                                                                                                                                                                         |
| 2146 | Heterozygous PS in RH, not shared by DM | PGSC0003DMG40003<br>4537 | PGSC0003DMT4000<br>84966 | chr10 | NO  | NO  |                                                                                                                                                                                                                         |

|      |                                               |                          |                          |       |     |     |                                                                                                                    |
|------|-----------------------------------------------|--------------------------|--------------------------|-------|-----|-----|--------------------------------------------------------------------------------------------------------------------|
| 2147 | Heterozygous<br>PS in RH, not<br>shared by DM | PGSC0003DMG40003<br>4550 | PGSC0003DMT4000<br>84979 |       |     |     |                                                                                                                    |
| 2148 | Heterozygous<br>PS in RH, not<br>shared by DM | PGSC0003DMG40003<br>4551 | PGSC0003DMT4000<br>84980 | chr10 | yes | yes |                                                                                                                    |
| 2149 | Heterozygous<br>PS in RH, not<br>shared by DM | PGSC0003DMG40003<br>4576 | PGSC0003DMT4000<br>85005 | chr06 | yes | NO  | GO:0005622; intracellular; Cellular<br>Component GO:0008270; zinc ion<br>binding; Molecular Function               |
| 2150 | Heterozygous<br>PS in RH, not<br>shared by DM | PGSC0003DMG40003<br>4597 | PGSC0003DMT4000<br>85026 | chr12 | NO  | NO  |                                                                                                                    |
| 2151 | Heterozygous<br>PS in RH, not<br>shared by DM | PGSC0003DMG40003<br>4599 | PGSC0003DMT4000<br>85028 | chr01 | yes | NO  |                                                                                                                    |
| 2152 | Heterozygous<br>PS in RH, not<br>shared by DM | PGSC0003DMG40003<br>4645 | PGSC0003DMT4000<br>85074 | chr03 | NO  | NO  | GO:0008152; metabolic process;<br>Biological Process GO:0016491;<br>oxidoreductase activity; Molecular<br>Function |
| 2153 | Heterozygous<br>PS in RH, not<br>shared by DM | PGSC0003DMG40003<br>4646 | PGSC0003DMT4000<br>85075 | -     | yes | NO  |                                                                                                                    |
| 2154 | Heterozygous<br>PS in RH, not<br>shared by DM | PGSC0003DMG40003<br>4677 | PGSC0003DMT4000<br>85106 | chr06 | NO  | NO  |                                                                                                                    |
| 2155 | Heterozygous<br>PS in RH, not<br>shared by DM | PGSC0003DMG40003<br>4683 | PGSC0003DMT4000<br>85112 | chr01 | yes | NO  |                                                                                                                    |
| 2156 | Heterozygous<br>PS in RH, not<br>shared by DM | PGSC0003DMG40003<br>4699 | PGSC0003DMT4000<br>85128 | chr03 | yes | NO  |                                                                                                                    |

|      |                                               |                          |                          |       |     |     |                                                                                                                                                                                                                                                                                                 |
|------|-----------------------------------------------|--------------------------|--------------------------|-------|-----|-----|-------------------------------------------------------------------------------------------------------------------------------------------------------------------------------------------------------------------------------------------------------------------------------------------------|
| 2157 | Heterozygous<br>PS in RH, not<br>shared by DM | PGSC0003DMG40003<br>4702 | PGSC0003DMT4000<br>85131 | chr04 | yes | yes | GO:0004672; protein kinase activity;<br>Molecular Function GO:0005524; ATP<br>binding; Molecular Function<br>GO:0005529; sugar binding; Molecular<br>Function GO:0006468; protein amino acid<br>phosphorylation; Biological Process<br>GO:0048544; recognition of pollen;<br>Biological Process |
| 2158 | Heterozygous<br>PS in RH, not<br>shared by DM | PGSC0003DMG40003<br>4710 | PGSC0003DMT4000<br>85139 | chr03 | yes | NO  |                                                                                                                                                                                                                                                                                                 |
| 2159 | Heterozygous<br>PS in RH, not<br>shared by DM | PGSC0003DMG40003<br>4716 | PGSC0003DMT4000<br>85145 | chr06 | yes | NO  | GO:0004221; ubiquitin thiolesterase<br>activity; Molecular Function<br>GO:0005622; intracellular; Cellular<br>Component GO:0006511; ubiquitin-<br>dependent protein catabolic process;<br>Biological Process                                                                                    |
| 2160 | Heterozygous<br>PS in RH, not<br>shared by DM | PGSC0003DMG40003<br>4786 | PGSC0003DMT4000<br>85215 | chr08 | NO  | NO  |                                                                                                                                                                                                                                                                                                 |
| 2161 | Heterozygous<br>PS in RH, not<br>shared by DM | PGSC0003DMG40003<br>4798 | PGSC0003DMT4000<br>85227 | chr07 | NO  | NO  | GO:0004721; phosphoprotein phosphatase<br>activity; Molecular Function                                                                                                                                                                                                                          |
| 2162 | Heterozygous<br>PS in RH, not<br>shared by DM | PGSC0003DMG40003<br>4801 | PGSC0003DMT4000<br>85230 | chr03 | NO  | NO  |                                                                                                                                                                                                                                                                                                 |
| 2163 | Heterozygous<br>PS in RH, not<br>shared by DM | PGSC0003DMG40003<br>4829 | PGSC0003DMT4000<br>85258 | chr12 | NO  | NO  |                                                                                                                                                                                                                                                                                                 |
| 2164 | Heterozygous<br>PS in RH, not<br>shared by DM | PGSC0003DMG40003<br>4869 | PGSC0003DMT4000<br>85298 | chr05 | NO  | NO  |                                                                                                                                                                                                                                                                                                 |
| 2165 | Heterozygous<br>PS in RH, not<br>shared by DM | PGSC0003DMG40003<br>4906 | PGSC0003DMT4000<br>85335 | chr06 | NO  | NO  |                                                                                                                                                                                                                                                                                                 |



|      |                                               |                          |                          |       |     |     |                                                                                                                                                                                                                               |
|------|-----------------------------------------------|--------------------------|--------------------------|-------|-----|-----|-------------------------------------------------------------------------------------------------------------------------------------------------------------------------------------------------------------------------------|
| 2166 | Heterozygous<br>PS in RH, not<br>shared by DM | PGSC0003DMG40003<br>4953 | PGSC0003DMT4000<br>85382 | chr02 | yes | NO  | GO:0005215; transporter activity;<br>Molecular Function GO:0006810;<br>transport; Biological Process<br>GO:0016021; integral to membrane;<br>Cellular Component GO:0055085;<br>transmembrane transport; Biological<br>Process |
| 2167 | Heterozygous<br>PS in RH, not<br>shared by DM | PGSC0003DMG40003<br>4954 | PGSC0003DMT4000<br>85383 | chr02 | yes | NO  | GO:0005681; spliceosomal complex;<br>Cellular Component GO:0007067;<br>mitosis; Biological Process                                                                                                                            |
| 2168 | Heterozygous<br>PS in RH, not<br>shared by DM | PGSC0003DMG40003<br>4957 | PGSC0003DMT4000<br>85386 | chr10 | NO  | NO  |                                                                                                                                                                                                                               |
| 2169 | Heterozygous<br>PS in RH, not<br>shared by DM | PGSC0003DMG40003<br>4982 | PGSC0003DMT4000<br>85411 | chr06 | yes | NO  |                                                                                                                                                                                                                               |
| 2170 | Heterozygous<br>PS in RH, not<br>shared by DM | PGSC0003DMG40003<br>4997 | PGSC0003DMT4000<br>85426 | -     | NO  | NO  |                                                                                                                                                                                                                               |
| 2171 | Heterozygous<br>PS in RH, not<br>shared by DM | PGSC0003DMG40003<br>5022 | PGSC0003DMT4000<br>85451 | chr05 | NO  | NO  |                                                                                                                                                                                                                               |
| 2172 | Heterozygous<br>PS in RH, not<br>shared by DM | PGSC0003DMG40003<br>5026 | PGSC0003DMT4000<br>85455 | chr05 | yes | yes |                                                                                                                                                                                                                               |
| 2173 | Heterozygous<br>PS in RH, not<br>shared by DM | PGSC0003DMG40003<br>5051 | PGSC0003DMT4000<br>85480 | chr01 | yes | NO  | GO:0005215; transporter activity;<br>Molecular Function GO:0006810;<br>transport; Biological Process<br>GO:0016021; integral to membrane;<br>Cellular Component GO:0055085;<br>transmembrane transport; Biological<br>Process |
| 2174 | Heterozygous<br>PS in RH, not<br>shared by DM | PGSC0003DMG40003<br>5066 | PGSC0003DMT4000<br>85495 | chr12 | yes | yes | GO:0005515; protein binding; Molecular<br>Function                                                                                                                                                                            |
| 2175 | Heterozygous<br>PS in RH, not<br>shared by DM | PGSC0003DMG40003<br>5092 | PGSC0003DMT4000<br>85521 | -     | NO  | NO  |                                                                                                                                                                                                                               |

|      |                                               |                          |                          |       |     |     |                                                                                                                                                                                                                                                                                                      |
|------|-----------------------------------------------|--------------------------|--------------------------|-------|-----|-----|------------------------------------------------------------------------------------------------------------------------------------------------------------------------------------------------------------------------------------------------------------------------------------------------------|
| 2176 | Heterozygous<br>PS in RH, not<br>shared by DM | PGSC0003DMG40003<br>5124 | PGSC0003DMT4000<br>85553 | chr03 | NO  | NO  | GO:0009058; biosynthetic process;<br>Biological Process GO:0016769;<br>transferase activity, transferring<br>nitrogenous groups; Molecular Function<br>GO:0030170; pyridoxal phosphate<br>binding; Molecular Function                                                                                |
| 2177 | Heterozygous<br>PS in RH, not<br>shared by DM | PGSC0003DMG40003<br>5168 | PGSC0003DMT4000<br>85597 | chr01 | NO  | NO  |                                                                                                                                                                                                                                                                                                      |
| 2178 | Heterozygous<br>PS in RH, not<br>shared by DM | PGSC0003DMG40003<br>5180 | PGSC0003DMT4000<br>85609 | chr02 | yes | yes | GO:0006505; GPI anchor metabolic<br>process; Biological Process GO:0006886;<br>intracellular protein transport; Biological<br>Process GO:0016788; hydrolase activity,<br>acting on ester bonds; Molecular Function<br>GO:0031227; intrinsic to endoplasmic<br>reticulum membrane; Cellular Component |
| 2179 | Heterozygous<br>PS in RH, not<br>shared by DM | PGSC0003DMG40003<br>5237 | PGSC0003DMT4000<br>85666 | chr12 | NO  | NO  |                                                                                                                                                                                                                                                                                                      |
| 2180 | Heterozygous<br>PS in RH, not<br>shared by DM | PGSC0003DMG40003<br>5238 | PGSC0003DMT4000<br>85667 | chr03 | yes | yes |                                                                                                                                                                                                                                                                                                      |
| 2181 | Heterozygous<br>PS in RH, not<br>shared by DM | PGSC0003DMG40003<br>5245 | PGSC0003DMT4000<br>85674 | chr06 | yes | NO  | GO:0004672; protein kinase activity;<br>Molecular Function GO:0005524; ATP<br>binding; Molecular Function<br>GO:0006468; protein amino acid<br>phosphorylation; Biological Process                                                                                                                   |
| 2182 | Heterozygous<br>PS in RH, not<br>shared by DM | PGSC0003DMG40003<br>5273 | PGSC0003DMT4000<br>85702 | chr06 | NO  | NO  |                                                                                                                                                                                                                                                                                                      |
| 2183 | Heterozygous<br>PS in RH, not<br>shared by DM | PGSC0003DMG40003<br>5293 | PGSC0003DMT4000<br>85722 | -     | NO  | NO  | GO:0003723; RNA binding; Molecular<br>Function GO:0033897; ribonuclease T2<br>activity; Molecular Function                                                                                                                                                                                           |
| 2184 | Heterozygous<br>PS in RH, not<br>shared by DM | PGSC0003DMG40003<br>5324 | PGSC0003DMT4000<br>85753 | chr02 | yes | NO  |                                                                                                                                                                                                                                                                                                      |

|      |                                               |                          |                          |       |     |     |                                                                                                                                                                                                                                                                                                                                                                                                                                |
|------|-----------------------------------------------|--------------------------|--------------------------|-------|-----|-----|--------------------------------------------------------------------------------------------------------------------------------------------------------------------------------------------------------------------------------------------------------------------------------------------------------------------------------------------------------------------------------------------------------------------------------|
| 2185 | Heterozygous<br>PS in RH, not<br>shared by DM | PGSC0003DMG40003<br>5358 | PGSC0003DMT4000<br>85787 | chr09 | NO  | NO  |                                                                                                                                                                                                                                                                                                                                                                                                                                |
| 2186 | Heterozygous<br>PS in RH, not<br>shared by DM | PGSC0003DMG40003<br>5362 | PGSC0003DMT4000<br>85791 | chr01 | yes | NO  | GO:0003824; catalytic activity; Molecular<br>Function GO:0008152; metabolic process;<br>Biological Process                                                                                                                                                                                                                                                                                                                     |
| 2187 | Heterozygous<br>PS in RH, not<br>shared by DM | PGSC0003DMG40003<br>5364 | PGSC0003DMT4000<br>85793 | chr10 | yes | yes |                                                                                                                                                                                                                                                                                                                                                                                                                                |
| 2188 | Heterozygous<br>PS in RH, not<br>shared by DM | PGSC0003DMG40003<br>5426 | PGSC0003DMT4000<br>85855 | chr06 | yes | NO  | GO:0016491; oxidoreductase activity;<br>Molecular Function                                                                                                                                                                                                                                                                                                                                                                     |
| 2189 | Heterozygous<br>PS in RH, not<br>shared by DM | PGSC0003DMG40003<br>5432 | PGSC0003DMT4000<br>85861 | chr03 | yes | NO  | GO:0016491; oxidoreductase activity;<br>Molecular Function GO:0055114;<br>oxidation reduction; Biological Process                                                                                                                                                                                                                                                                                                              |
| 2190 | Heterozygous<br>PS in RH, not<br>shared by DM | PGSC0003DMG40003<br>5455 | PGSC0003DMT4000<br>85884 | chr12 | NO  | NO  | GO:0003735; structural constituent of<br>ribosome; Molecular Function<br>GO:0005622; intracellular; Cellular<br>Component GO:0005840; ribosome;<br>Cellular Component GO:0006412;<br>translation; Biological Process                                                                                                                                                                                                           |
| 2191 | Heterozygous<br>PS in RH, not<br>shared by DM | PGSC0003DMG40003<br>5461 | PGSC0003DMT4000<br>85890 | chr10 | NO  | NO  |                                                                                                                                                                                                                                                                                                                                                                                                                                |
| 2192 | Heterozygous<br>PS in RH, not<br>shared by DM | PGSC0003DMG40003<br>5475 | PGSC0003DMT4000<br>85904 | chr01 | yes | yes | GO:0003723; RNA binding; Molecular<br>Function GO:0003746; translation<br>elongation factor activity; Molecular<br>Function GO:0006452; translational<br>frameshifting; Biological Process<br>GO:0043022; ribosome binding;<br>Molecular Function GO:0045901; positive<br>regulation of translational elongation;<br>Biological Process GO:0045905; positive<br>regulation of translational termination;<br>Biological Process |

|      |                                               |                          |                          |       |     |     |                                                                                                                                                                                                                                                                                         |
|------|-----------------------------------------------|--------------------------|--------------------------|-------|-----|-----|-----------------------------------------------------------------------------------------------------------------------------------------------------------------------------------------------------------------------------------------------------------------------------------------|
| 2193 | Heterozygous<br>PS in RH, not<br>shared by DM | PGSC0003DMG40003<br>5479 | PGSC0003DMT4000<br>85908 | chr08 | yes | yes |                                                                                                                                                                                                                                                                                         |
| 2194 | Heterozygous<br>PS in RH, not<br>shared by DM | PGSC0003DMG40003<br>5483 | PGSC0003DMT4000<br>85912 | chr03 | yes | NO  |                                                                                                                                                                                                                                                                                         |
| 2195 | Heterozygous<br>PS in RH, not<br>shared by DM | PGSC0003DMG40003<br>5529 | PGSC0003DMT4000<br>85958 | chr10 | NO  | NO  |                                                                                                                                                                                                                                                                                         |
| 2196 | Heterozygous<br>PS in RH, not<br>shared by DM | PGSC0003DMG40003<br>5534 | PGSC0003DMT4000<br>85963 | chr04 | yes | NO  | GO:0006855; multidrug transport;<br>Biological Process GO:0015238; drug<br>transporter activity; Molecular Function<br>GO:0015297; antiporter activity;<br>Molecular Function GO:0016020;<br>membrane; Cellular Component<br>GO:0055085; transmembrane transport;<br>Biological Process |
| 2197 | Heterozygous<br>PS in RH, not<br>shared by DM | PGSC0003DMG40003<br>5552 | PGSC0003DMT4000<br>85981 | chr06 | yes | yes |                                                                                                                                                                                                                                                                                         |
| 2198 | Heterozygous<br>PS in RH, not<br>shared by DM | PGSC0003DMG40003<br>5553 | PGSC0003DMT4000<br>85982 | chr07 | yes | NO  | GO:0003824; catalytic activity; Molecular<br>Function GO:0008152; metabolic process;<br>Biological Process                                                                                                                                                                              |
| 2199 | Heterozygous<br>PS in RH, not<br>shared by DM | PGSC0003DMG40003<br>5594 | PGSC0003DMT4000<br>86023 | chr06 | yes | NO  |                                                                                                                                                                                                                                                                                         |
| 2200 | Heterozygous<br>PS in RH, not<br>shared by DM | PGSC0003DMG40003<br>5609 | PGSC0003DMT4000<br>86038 | chr12 | yes | NO  | GO:0005515; protein binding; Molecular<br>Function                                                                                                                                                                                                                                      |
| 2201 | Heterozygous<br>PS in RH, not<br>shared by DM | PGSC0003DMG40003<br>5629 | PGSC0003DMT4000<br>86058 | chr11 | yes | NO  |                                                                                                                                                                                                                                                                                         |
| 2202 | Heterozygous<br>PS in RH, not<br>shared by DM | PGSC0003DMG40003<br>5671 | PGSC0003DMT4000<br>86100 |       |     |     |                                                                                                                                                                                                                                                                                         |
| 2203 | Heterozygous<br>PS in RH, not<br>shared by DM | PGSC0003DMG40003<br>5678 | PGSC0003DMT4000<br>86107 | chr05 | yes | NO  |                                                                                                                                                                                                                                                                                         |

|      |                                         |                          |                          |       |     |     |                                                                                                                                                                                                                                                           |
|------|-----------------------------------------|--------------------------|--------------------------|-------|-----|-----|-----------------------------------------------------------------------------------------------------------------------------------------------------------------------------------------------------------------------------------------------------------|
| 2204 | Heterozygous PS in RH, not shared by DM | PGSC0003DMG40003<br>5704 | PGSC0003DMT4000<br>86133 | chr05 | NO  | NO  |                                                                                                                                                                                                                                                           |
| 2205 | Heterozygous PS in RH, not shared by DM | PGSC0003DMG40003<br>5713 | PGSC0003DMT4000<br>86142 | chr08 | yes | yes |                                                                                                                                                                                                                                                           |
| 2206 | Heterozygous PS in RH, not shared by DM | PGSC0003DMG40003<br>5723 | PGSC0003DMT4000<br>86152 | chr05 | yes | NO  | GO:0005669; transcription factor TFIID complex; Cellular Component<br>GO:0006367; transcription initiation from RNA polymerase II promoter; Biological Process<br>GO:0016251; general RNA polymerase II transcription factor activity; Molecular Function |
| 2207 | Heterozygous PS in RH, not shared by DM | PGSC0003DMG40003<br>5757 | PGSC0003DMT4000<br>86186 | chr05 | NO  | NO  |                                                                                                                                                                                                                                                           |
| 2208 | Heterozygous PS in RH, not shared by DM | PGSC0003DMG40003<br>5763 | PGSC0003DMT4000<br>86192 | -     | yes | yes | GO:0005198; structural molecule activity; Molecular Function                                                                                                                                                                                              |
| 2209 | Heterozygous PS in RH, not shared by DM | PGSC0003DMG40003<br>5782 | PGSC0003DMT4000<br>86211 | chr10 | yes | yes |                                                                                                                                                                                                                                                           |
| 2210 | Heterozygous PS in RH, not shared by DM | PGSC0003DMG40003<br>5801 | PGSC0003DMT4000<br>86230 | chr03 | yes | yes | GO:0003723; RNA binding; Molecular Function<br>GO:0003964; RNA-directed DNA polymerase activity; Molecular Function<br>GO:0006278; RNA-dependent DNA replication; Biological Process<br>GO:0008380; RNA splicing; Biological Process                      |
| 2211 | Heterozygous PS in RH, not shared by DM | PGSC0003DMG40003<br>5810 | PGSC0003DMT4000<br>86239 | -     | yes | NO  |                                                                                                                                                                                                                                                           |
| 2212 | Heterozygous PS in RH, not shared by DM | PGSC0003DMG40003<br>5851 | PGSC0003DMT4000<br>86280 | chr02 | yes | NO  |                                                                                                                                                                                                                                                           |
| 2213 | Heterozygous PS in RH, not shared by DM | PGSC0003DMG40003<br>5919 | PGSC0003DMT4000<br>86348 | chr07 | yes | NO  |                                                                                                                                                                                                                                                           |

|      |                                               |                          |                          |       |     |    |                                                                                                                                                                                                                                                                                                                                                                                                                |
|------|-----------------------------------------------|--------------------------|--------------------------|-------|-----|----|----------------------------------------------------------------------------------------------------------------------------------------------------------------------------------------------------------------------------------------------------------------------------------------------------------------------------------------------------------------------------------------------------------------|
| 2214 | Heterozygous<br>PS in RH, not<br>shared by DM | PGSC0003DMG40003<br>5997 | PGSC0003DMT4000<br>86426 | -     | yes | NO |                                                                                                                                                                                                                                                                                                                                                                                                                |
| 2215 | Heterozygous<br>PS in RH, not<br>shared by DM | PGSC0003DMG40003<br>6076 | PGSC0003DMT4000<br>86505 | chr08 | yes | NO |                                                                                                                                                                                                                                                                                                                                                                                                                |
| 2216 | Heterozygous<br>PS in RH, not<br>shared by DM | PGSC0003DMG40003<br>6089 | PGSC0003DMT4000<br>86518 | chr06 | NO  | NO |                                                                                                                                                                                                                                                                                                                                                                                                                |
| 2217 | Heterozygous<br>PS in RH, not<br>shared by DM | PGSC0003DMG40003<br>6107 | PGSC0003DMT4000<br>86536 | chr09 | NO  | NO |                                                                                                                                                                                                                                                                                                                                                                                                                |
| 2218 | Heterozygous<br>PS in RH, not<br>shared by DM | PGSC0003DMG40003<br>6165 | PGSC0003DMT4000<br>86594 | chr10 | NO  | NO |                                                                                                                                                                                                                                                                                                                                                                                                                |
| 2219 | Heterozygous<br>PS in RH, not<br>shared by DM | PGSC0003DMG40003<br>6178 | PGSC0003DMT4000<br>86607 | chr10 | yes | NO | GO:0003995; acyl-CoA dehydrogenase<br>activity; Molecular Function<br>GO:0003997; acyl-CoA oxidase activity;<br>Molecular Function GO:0005777;<br>peroxisome; Cellular Component<br>GO:0006635; fatty acid beta-oxidation;<br>Biological Process GO:0016627;<br>oxidoreductase activity, acting on the CH-<br>CH group of donors; Molecular Function<br>GO:0055114; oxidation reduction;<br>Biological Process |
| 2220 | Heterozygous<br>PS in RH, not<br>shared by DM | PGSC0003DMG40003<br>6236 | PGSC0003DMT4000<br>86665 | -     | yes | NO |                                                                                                                                                                                                                                                                                                                                                                                                                |
| 2221 | Heterozygous<br>PS in RH, not<br>shared by DM | PGSC0003DMG40003<br>6257 | PGSC0003DMT4000<br>86686 | chr05 | yes | NO | GO:0016491; oxidoreductase activity;<br>Molecular Function                                                                                                                                                                                                                                                                                                                                                     |
| 2222 | Heterozygous<br>PS in RH, not<br>shared by DM | PGSC0003DMG40003<br>6315 | PGSC0003DMT4000<br>86744 | chr05 | yes | NO |                                                                                                                                                                                                                                                                                                                                                                                                                |
| 2223 | Heterozygous<br>PS in RH, not<br>shared by DM | PGSC0003DMG40003<br>6369 | PGSC0003DMT4000<br>86798 | chr09 | yes | NO |                                                                                                                                                                                                                                                                                                                                                                                                                |

|      |                                               |                          |                          |       |     |     |                                                                                                                                                                                    |
|------|-----------------------------------------------|--------------------------|--------------------------|-------|-----|-----|------------------------------------------------------------------------------------------------------------------------------------------------------------------------------------|
| 2224 | Heterozygous<br>PS in RH, not<br>shared by DM | PGSC0003DMG40003<br>6448 | PGSC0003DMT4000<br>86877 | chr04 | yes | NO  | GO:0004672; protein kinase activity;<br>Molecular Function GO:0005524; ATP<br>binding; Molecular Function<br>GO:0006468; protein amino acid<br>phosphorylation; Biological Process |
| 2225 | Heterozygous<br>PS in RH, not<br>shared by DM | PGSC0003DMG40003<br>6567 | PGSC0003DMT4000<br>86996 | chr07 | yes | NO  |                                                                                                                                                                                    |
| 2226 | Heterozygous<br>PS in RH, not<br>shared by DM | PGSC0003DMG40003<br>6575 | PGSC0003DMT4000<br>87004 | chr02 | yes | NO  |                                                                                                                                                                                    |
| 2227 | Heterozygous<br>PS in RH, not<br>shared by DM | PGSC0003DMG40003<br>6598 | PGSC0003DMT4000<br>87027 | chr06 | NO  | NO  |                                                                                                                                                                                    |
| 2228 | Heterozygous<br>PS in RH, not<br>shared by DM | PGSC0003DMG40003<br>6600 | PGSC0003DMT4000<br>87029 | chr04 | NO  | NO  |                                                                                                                                                                                    |
| 2229 | Heterozygous<br>PS in RH, not<br>shared by DM | PGSC0003DMG40003<br>6615 | PGSC0003DMT4000<br>87044 | chr08 | NO  | NO  |                                                                                                                                                                                    |
| 2230 | Heterozygous<br>PS in RH, not<br>shared by DM | PGSC0003DMG40003<br>6621 | PGSC0003DMT4000<br>87050 | chr06 | yes | NO  |                                                                                                                                                                                    |
| 2231 | Heterozygous<br>PS in RH, not<br>shared by DM | PGSC0003DMG40003<br>6686 | PGSC0003DMT4000<br>87115 | chr06 | yes | NO  |                                                                                                                                                                                    |
| 2232 | Heterozygous<br>PS in RH, not<br>shared by DM | PGSC0003DMG40003<br>6690 | PGSC0003DMT4000<br>87119 | chr07 | yes | yes |                                                                                                                                                                                    |
| 2233 | Heterozygous<br>PS in RH, not<br>shared by DM | PGSC0003DMG40003<br>6700 | PGSC0003DMT4000<br>87129 | chr01 | yes | NO  | GO:0008152; metabolic process;<br>Biological Process GO:0016491;<br>oxidoreductase activity; Molecular<br>Function                                                                 |
| 2234 | Heterozygous<br>PS in RH, not<br>shared by DM | PGSC0003DMG40003<br>6707 | PGSC0003DMT4000<br>87136 | chr11 | NO  | NO  |                                                                                                                                                                                    |

|      |                                               |                          |                          |       |     |     |                                                                                                                                                                                                                                       |
|------|-----------------------------------------------|--------------------------|--------------------------|-------|-----|-----|---------------------------------------------------------------------------------------------------------------------------------------------------------------------------------------------------------------------------------------|
| 2235 | Heterozygous<br>PS in RH, not<br>shared by DM | PGSC0003DMG40003<br>6709 | PGSC0003DMT4000<br>87138 | chr04 | yes | NO  |                                                                                                                                                                                                                                       |
| 2236 | Heterozygous<br>PS in RH, not<br>shared by DM | PGSC0003DMG40003<br>6712 | PGSC0003DMT4000<br>87141 | -     | NO  | NO  |                                                                                                                                                                                                                                       |
| 2237 | Heterozygous<br>PS in RH, not<br>shared by DM | PGSC0003DMG40003<br>6743 | PGSC0003DMT4000<br>87172 | chr01 | NO  | NO  |                                                                                                                                                                                                                                       |
| 2238 | Heterozygous<br>PS in RH, not<br>shared by DM | PGSC0003DMG40003<br>6854 | PGSC0003DMT4000<br>87283 | chr04 | NO  | NO  | GO:0004672; protein kinase activity;<br>Molecular Function GO:0005524; ATP<br>binding; Molecular Function<br>GO:0006468; protein amino acid<br>phosphorylation; Biological Process                                                    |
| 2239 | Heterozygous<br>PS in RH, not<br>shared by DM | PGSC0003DMG40003<br>6859 | PGSC0003DMT4000<br>87288 | -     | yes | NO  | GO:0004497; monooxygenase activity;<br>Molecular Function GO:0005506; iron ion<br>binding; Molecular Function<br>GO:0009055; electron carrier activity;<br>Molecular Function GO:0020037; heme<br>binding; Molecular Function         |
| 2240 | Heterozygous<br>PS in RH, not<br>shared by DM | PGSC0003DMG40003<br>6860 | PGSC0003DMT4000<br>87289 | -     | NO  | NO  |                                                                                                                                                                                                                                       |
| 2241 | Heterozygous<br>PS in RH, not<br>shared by DM | PGSC0003DMG40003<br>6884 | PGSC0003DMT4000<br>87313 | chr01 | yes | NO  | GO:0004672; protein kinase activity;<br>Molecular Function GO:0005515; protein<br>binding; Molecular Function<br>GO:0005524; ATP binding; Molecular<br>Function GO:0006468; protein amino acid<br>phosphorylation; Biological Process |
| 2242 | Heterozygous<br>PS in RH, not<br>shared by DM | PGSC0003DMG40003<br>6920 | PGSC0003DMT4000<br>87349 | chr08 | yes | NO  |                                                                                                                                                                                                                                       |
| 2243 | Heterozygous<br>PS in RH, not<br>shared by DM | PGSC0003DMG40003<br>6950 | PGSC0003DMT4000<br>87379 | chr10 | NO  | NO  |                                                                                                                                                                                                                                       |
| 2244 | Heterozygous<br>PS in RH, not<br>shared by DM | PGSC0003DMG40003<br>6976 | PGSC0003DMT4000<br>87405 | chr04 | yes | yes |                                                                                                                                                                                                                                       |



|      |                                               |                          |                          |       |     |    |                                                                                                                                                                                                                                                                                                                                                                                                                                                                                 |
|------|-----------------------------------------------|--------------------------|--------------------------|-------|-----|----|---------------------------------------------------------------------------------------------------------------------------------------------------------------------------------------------------------------------------------------------------------------------------------------------------------------------------------------------------------------------------------------------------------------------------------------------------------------------------------|
| 2245 | Heterozygous<br>PS in RH, not<br>shared by DM | PGSC0003DMG40003<br>6994 | PGSC0003DMT4000<br>87423 | chr11 | NO  | NO |                                                                                                                                                                                                                                                                                                                                                                                                                                                                                 |
| 2246 | Heterozygous<br>PS in RH, not<br>shared by DM | PGSC0003DMG40003<br>7026 | PGSC0003DMT4000<br>87455 | -     | NO  | NO |                                                                                                                                                                                                                                                                                                                                                                                                                                                                                 |
| 2247 | Heterozygous<br>PS in RH, not<br>shared by DM | PGSC0003DMG40003<br>7031 | PGSC0003DMT4000<br>87460 | chr05 | NO  | NO |                                                                                                                                                                                                                                                                                                                                                                                                                                                                                 |
| 2248 | Heterozygous<br>PS in RH, not<br>shared by DM | PGSC0003DMG40003<br>7033 | PGSC0003DMT4000<br>87462 | chr12 | yes | NO | GO:0000166; nucleotide binding;<br>Molecular Function GO:0004814;<br>arginine-tRNA ligase activity; Molecular<br>Function GO:0005524; ATP binding;<br>Molecular Function GO:0005737;<br>cytoplasm; Cellular Component<br>GO:0006412; translation; Biological<br>Process GO:0006420; arginyl-tRNA<br>aminoacylation; Biological Process<br>GO:0012511; monolayer-surrounded lipid<br>storage body; Cellular Component<br>GO:0016021; integral to membrane;<br>Cellular Component |
| 2249 | Heterozygous<br>PS in RH, not<br>shared by DM | PGSC0003DMG40003<br>7040 | PGSC0003DMT4000<br>87469 | chr06 | yes | NO | GO:0009055; electron carrier activity;<br>Molecular Function GO:0016491;<br>oxidoreductase activity; Molecular<br>Function                                                                                                                                                                                                                                                                                                                                                      |
| 2250 | Heterozygous<br>PS in RH, not<br>shared by DM | PGSC0003DMG40003<br>7098 | PGSC0003DMT4000<br>87527 | chr01 | yes | NO |                                                                                                                                                                                                                                                                                                                                                                                                                                                                                 |
| 2251 | Heterozygous<br>PS in RH, not<br>shared by DM | PGSC0003DMG40003<br>7112 | PGSC0003DMT4000<br>87541 | chr10 | yes | NO |                                                                                                                                                                                                                                                                                                                                                                                                                                                                                 |
| 2252 | Heterozygous<br>PS in RH, not<br>shared by DM | PGSC0003DMG40003<br>7143 | PGSC0003DMT4000<br>87572 | -     | NO  | NO |                                                                                                                                                                                                                                                                                                                                                                                                                                                                                 |
| 2253 | Heterozygous<br>PS in RH, not<br>shared by DM | PGSC0003DMG40003<br>7147 | PGSC0003DMT4000<br>87576 | chr03 | NO  | NO |                                                                                                                                                                                                                                                                                                                                                                                                                                                                                 |

|      |                                               |                          |                          |       |     |     |                                                                                                                                                                                                                                                                                 |
|------|-----------------------------------------------|--------------------------|--------------------------|-------|-----|-----|---------------------------------------------------------------------------------------------------------------------------------------------------------------------------------------------------------------------------------------------------------------------------------|
| 2254 | Heterozygous<br>PS in RH, not<br>shared by DM | PGSC0003DMG40003<br>7192 | PGSC0003DMT4000<br>87621 | chr08 | yes | NO  | GO:0004553; hydrolase activity,<br>hydrolyzing O-glycosyl compounds;<br>Molecular Function GO:0005576;<br>extracellular region; Cellular Component<br>GO:0005975; carbohydrate metabolic<br>process; Biological Process GO:0030246;<br>carbohydrate binding; Molecular Function |
| 2255 | Heterozygous<br>PS in RH, not<br>shared by DM | PGSC0003DMG40003<br>7213 | PGSC0003DMT4000<br>87642 | -     | NO  | NO  |                                                                                                                                                                                                                                                                                 |
| 2256 | Heterozygous<br>PS in RH, not<br>shared by DM | PGSC0003DMG40003<br>7266 | PGSC0003DMT4000<br>87695 | chr05 | yes | NO  |                                                                                                                                                                                                                                                                                 |
| 2257 | Heterozygous<br>PS in RH, not<br>shared by DM | PGSC0003DMG40003<br>7274 | PGSC0003DMT4000<br>87703 | chr10 | NO  | NO  | GO:0006457; protein folding; Biological<br>Process                                                                                                                                                                                                                              |
| 2258 | Heterozygous<br>PS in RH, not<br>shared by DM | PGSC0003DMG40003<br>7288 | PGSC0003DMT4000<br>87717 | chr05 | yes | yes |                                                                                                                                                                                                                                                                                 |
| 2259 | Heterozygous<br>PS in RH, not<br>shared by DM | PGSC0003DMG40003<br>7342 | PGSC0003DMT4000<br>87771 | chr08 | yes | NO  | GO:0003824; catalytic activity; Molecular<br>Function GO:0008152; metabolic process;<br>Biological Process GO:0030170;<br>pyridoxal phosphate binding; Molecular<br>Function                                                                                                    |
| 2260 | Heterozygous<br>PS in RH, not<br>shared by DM | PGSC0003DMG40003<br>7352 | PGSC0003DMT4000<br>87781 | chr02 | yes | yes |                                                                                                                                                                                                                                                                                 |
| 2261 | Heterozygous<br>PS in RH, not<br>shared by DM | PGSC0003DMG40003<br>7431 | PGSC0003DMT4000<br>87860 | chr09 | NO  | NO  |                                                                                                                                                                                                                                                                                 |
| 2262 | Heterozygous<br>PS in RH, not<br>shared by DM | PGSC0003DMG40003<br>7447 | PGSC0003DMT4000<br>87876 | chr11 | yes | NO  |                                                                                                                                                                                                                                                                                 |
| 2263 | Heterozygous<br>PS in RH, not<br>shared by DM | PGSC0003DMG40003<br>7456 | PGSC0003DMT4000<br>87885 | chr01 | yes | NO  |                                                                                                                                                                                                                                                                                 |

|      |                                               |                          |                          |       |     |    |                                                                                                                                                                                                                                                                                         |
|------|-----------------------------------------------|--------------------------|--------------------------|-------|-----|----|-----------------------------------------------------------------------------------------------------------------------------------------------------------------------------------------------------------------------------------------------------------------------------------------|
| 2264 | Heterozygous<br>PS in RH, not<br>shared by DM | PGSC0003DMG40003<br>7533 | PGSC0003DMT4000<br>87962 | chr06 | NO  | NO |                                                                                                                                                                                                                                                                                         |
| 2265 | Heterozygous<br>PS in RH, not<br>shared by DM | PGSC0003DMG40003<br>7539 | PGSC0003DMT4000<br>87968 | chr09 | NO  | NO |                                                                                                                                                                                                                                                                                         |
| 2266 | Heterozygous<br>PS in RH, not<br>shared by DM | PGSC0003DMG40003<br>7558 | PGSC0003DMT4000<br>87987 | chr12 | NO  | NO |                                                                                                                                                                                                                                                                                         |
| 2267 | Heterozygous<br>PS in RH, not<br>shared by DM | PGSC0003DMG40003<br>7586 | PGSC0003DMT4000<br>88015 | chr08 | yes | NO |                                                                                                                                                                                                                                                                                         |
| 2268 | Heterozygous<br>PS in RH, not<br>shared by DM | PGSC0003DMG40003<br>7590 | PGSC0003DMT4000<br>88019 | chr06 | NO  | NO |                                                                                                                                                                                                                                                                                         |
| 2269 | Heterozygous<br>PS in RH, not<br>shared by DM | PGSC0003DMG40003<br>7616 | PGSC0003DMT4000<br>88045 | chr02 | yes | NO |                                                                                                                                                                                                                                                                                         |
| 2270 | Heterozygous<br>PS in RH, not<br>shared by DM | PGSC0003DMG40003<br>7628 | PGSC0003DMT4000<br>88057 | chr12 | yes | NO | GO:0006855; multidrug transport;<br>Biological Process GO:0015238; drug<br>transporter activity; Molecular Function<br>GO:0015297; antiporter activity;<br>Molecular Function GO:0016020;<br>membrane; Cellular Component<br>GO:0055085; transmembrane transport;<br>Biological Process |
| 2271 | Heterozygous<br>PS in RH, not<br>shared by DM | PGSC0003DMG40003<br>7700 | PGSC0003DMT4000<br>88129 | chr02 | NO  | NO |                                                                                                                                                                                                                                                                                         |
| 2272 | Heterozygous<br>PS in RH, not<br>shared by DM | PGSC0003DMG40003<br>7701 | PGSC0003DMT4000<br>88130 | chr09 | NO  | NO |                                                                                                                                                                                                                                                                                         |
| 2273 | Heterozygous<br>PS in RH, not<br>shared by DM | PGSC0003DMG40003<br>7729 | PGSC0003DMT4000<br>88158 | chr03 | yes | NO |                                                                                                                                                                                                                                                                                         |
| 2274 | Heterozygous<br>PS in RH, not<br>shared by DM | PGSC0003DMG40003<br>7774 | PGSC0003DMT4000<br>88203 | chr11 | NO  | NO |                                                                                                                                                                                                                                                                                         |

|      |                                               |                          |                          |       |     |     |                                                                                                                                                                                                                                                                                                                                                                                                      |
|------|-----------------------------------------------|--------------------------|--------------------------|-------|-----|-----|------------------------------------------------------------------------------------------------------------------------------------------------------------------------------------------------------------------------------------------------------------------------------------------------------------------------------------------------------------------------------------------------------|
| 2275 | Heterozygous<br>PS in RH, not<br>shared by DM | PGSC0003DMG40003<br>7798 | PGSC0003DMT4000<br>88227 | chr11 | yes | yes | GO:0004888; transmembrane receptor<br>activity; Molecular Function<br>GO:0005515; protein binding; Molecular<br>Function GO:0005524; ATP binding;<br>Molecular Function GO:0006915;<br>apoptosis; Biological Process<br>GO:0007165; signal transduction;<br>Biological Process GO:0031224; intrinsic<br>to membrane; Cellular Component<br>GO:0045087; innate immune response;<br>Biological Process |
| 2276 | Heterozygous<br>PS in RH, not<br>shared by DM | PGSC0003DMG40003<br>7832 | PGSC0003DMT4000<br>88261 | -     | NO  | NO  | GO:0005524; ATP binding; Molecular<br>Function GO:0006915; apoptosis;<br>Biological Process                                                                                                                                                                                                                                                                                                          |
| 2277 | Heterozygous<br>PS in RH, not<br>shared by DM | PGSC0003DMG40003<br>7875 | PGSC0003DMT4000<br>88304 | chr03 | NO  | NO  |                                                                                                                                                                                                                                                                                                                                                                                                      |
| 2278 | Heterozygous<br>PS in RH, not<br>shared by DM | PGSC0003DMG40003<br>7895 | PGSC0003DMT4000<br>88324 | chr06 | NO  | NO  |                                                                                                                                                                                                                                                                                                                                                                                                      |
| 2279 | Heterozygous<br>PS in RH, not<br>shared by DM | PGSC0003DMG40003<br>7923 | PGSC0003DMT4000<br>88352 | chr06 | yes | NO  |                                                                                                                                                                                                                                                                                                                                                                                                      |
| 2280 | Heterozygous<br>PS in RH, not<br>shared by DM | PGSC0003DMG40003<br>7943 | PGSC0003DMT4000<br>88372 | chr05 | yes | yes |                                                                                                                                                                                                                                                                                                                                                                                                      |
| 2281 | Heterozygous<br>PS in RH, not<br>shared by DM | PGSC0003DMG40003<br>7974 | PGSC0003DMT4000<br>88403 | chr07 | NO  | NO  | GO:0003677; DNA binding; Molecular<br>Function GO:0006355; regulation of<br>transcription, DNA-dependent; Biological<br>Process                                                                                                                                                                                                                                                                      |
| 2282 | Heterozygous<br>PS in RH, not<br>shared by DM | PGSC0003DMG40003<br>7979 | PGSC0003DMT4000<br>88408 | -     | yes | yes |                                                                                                                                                                                                                                                                                                                                                                                                      |

|      |                                               |                          |                          |       |     |     |                                                                                                                                                                                                                                                                                                           |
|------|-----------------------------------------------|--------------------------|--------------------------|-------|-----|-----|-----------------------------------------------------------------------------------------------------------------------------------------------------------------------------------------------------------------------------------------------------------------------------------------------------------|
| 2283 | Heterozygous<br>PS in RH, not<br>shared by DM | PGSC0003DMG40003<br>7991 | PGSC0003DMT4000<br>88420 | chr01 | yes | NO  | GO:0009055; electron carrier activity;<br>Molecular Function GO:0016491;<br>oxidoreductase activity; Molecular<br>Function GO:0046872; metal ion binding;<br>Molecular Function GO:0051536; iron-<br>sulfur cluster binding; Molecular Function<br>GO:0055114; oxidation reduction;<br>Biological Process |
| 2284 | Heterozygous<br>PS in RH, not<br>shared by DM | PGSC0003DMG40003<br>8044 | PGSC0003DMT4000<br>88473 | chr05 | yes | yes |                                                                                                                                                                                                                                                                                                           |
| 2285 | Heterozygous<br>PS in RH, not<br>shared by DM | PGSC0003DMG40003<br>8052 | PGSC0003DMT4000<br>88481 | chr06 | yes | NO  |                                                                                                                                                                                                                                                                                                           |
| 2286 | Heterozygous<br>PS in RH, not<br>shared by DM | PGSC0003DMG40003<br>8095 | PGSC0003DMT4000<br>88524 | chr08 | yes | yes | GO:0005524; ATP binding; Molecular<br>Function GO:0005634; nucleus; Cellular<br>Component GO:0016818; hydrolase<br>activity, acting on acid anhydrides, in<br>phosphorus-containing anhydrides;<br>Molecular Function GO:0045449;<br>regulation of transcription; Biological<br>Process                   |
| 2287 | Heterozygous<br>PS in RH, not<br>shared by DM | PGSC0003DMG40003<br>8177 | PGSC0003DMT4000<br>88606 | chr02 | yes | NO  |                                                                                                                                                                                                                                                                                                           |
| 2288 | Heterozygous<br>PS in RH, not<br>shared by DM | PGSC0003DMG40003<br>8181 | PGSC0003DMT4000<br>88610 | chr04 | NO  | NO  |                                                                                                                                                                                                                                                                                                           |
| 2289 | Heterozygous<br>PS in RH, not<br>shared by DM | PGSC0003DMG40003<br>8205 | PGSC0003DMT4000<br>88634 | chr08 | yes | yes |                                                                                                                                                                                                                                                                                                           |
| 2290 | Heterozygous<br>PS in RH, not<br>shared by DM | PGSC0003DMG40003<br>8206 | PGSC0003DMT4000<br>88635 | chr01 | yes | yes | GO:0003723; RNA binding; Molecular<br>Function                                                                                                                                                                                                                                                            |
| 2291 | Heterozygous<br>PS in RH, not<br>shared by DM | PGSC0003DMG40003<br>8255 | PGSC0003DMT4000<br>88684 | chr11 | yes | NO  |                                                                                                                                                                                                                                                                                                           |

|      |                                         |                          |                          |       |     |     |                                                                                                                                                                                                                |
|------|-----------------------------------------|--------------------------|--------------------------|-------|-----|-----|----------------------------------------------------------------------------------------------------------------------------------------------------------------------------------------------------------------|
| 2292 | Heterozygous PS in RH, not shared by DM | PGSC0003DMG40003<br>8280 | PGSC0003DMT4000<br>88709 | -     | NO  | NO  |                                                                                                                                                                                                                |
| 2293 | Heterozygous PS in RH, not shared by DM | PGSC0003DMG40003<br>8281 | PGSC0003DMT4000<br>88710 | chr11 | yes | NO  |                                                                                                                                                                                                                |
| 2294 | Heterozygous PS in RH, not shared by DM | PGSC0003DMG40003<br>8339 | PGSC0003DMT4000<br>88768 | chr09 | yes | NO  | GO:0004497; monooxygenase activity; Molecular Function GO:0005506; iron ion binding; Molecular Function GO:0009055; electron carrier activity; Molecular Function GO:0020037; heme binding; Molecular Function |
| 2295 | Heterozygous PS in RH, not shared by DM | PGSC0003DMG40003<br>8355 | PGSC0003DMT4000<br>88784 | chr09 | yes | NO  |                                                                                                                                                                                                                |
| 2296 | Heterozygous PS in RH, not shared by DM | PGSC0003DMG40003<br>8359 | PGSC0003DMT4000<br>88788 | -     | yes | yes | GO:0003676; nucleic acid binding; Molecular Function GO:0003677; DNA binding; Molecular Function GO:0004386; helicase activity; Molecular Function GO:0005524; ATP binding; Molecular Function                 |
| 2297 | Heterozygous PS in RH, not shared by DM | PGSC0003DMG40003<br>8383 | PGSC0003DMT4000<br>88812 | chr03 | yes | NO  |                                                                                                                                                                                                                |
| 2298 | Heterozygous PS in RH, not shared by DM | PGSC0003DMG40003<br>8403 | PGSC0003DMT4000<br>88832 | chr03 | yes | yes | GO:0008152; metabolic process; Biological Process GO:0016491; oxidoreductase activity; Molecular Function                                                                                                      |
| 2299 | Heterozygous PS in RH, not shared by DM | PGSC0003DMG40003<br>8416 | PGSC0003DMT4000<br>88845 | chr10 | yes | NO  | GO:0003735; structural constituent of ribosome; Molecular Function GO:0005622; intracellular; Cellular Component GO:0005840; ribosome; Cellular Component GO:0006412; translation; Biological Process          |
| 2300 | Heterozygous PS in RH, not shared by DM | PGSC0003DMG40003<br>8426 | PGSC0003DMT4000<br>88855 | chr01 | yes | NO  | GO:0004185; serine-type carboxypeptidase activity; Molecular Function GO:0006508; proteolysis; Biological Process                                                                                              |

|      |                                               |                          |                          |       |     |     |                                                                                                                                              |
|------|-----------------------------------------------|--------------------------|--------------------------|-------|-----|-----|----------------------------------------------------------------------------------------------------------------------------------------------|
| 2301 | Heterozygous<br>PS in RH, not<br>shared by DM | PGSC0003DMG40003<br>8427 | PGSC0003DMT4000<br>88856 | chr10 | yes | yes |                                                                                                                                              |
| 2302 | Heterozygous<br>PS in RH, not<br>shared by DM | PGSC0003DMG40003<br>8438 | PGSC0003DMT4000<br>88867 | chr10 | NO  | NO  |                                                                                                                                              |
| 2303 | Heterozygous<br>PS in RH, not<br>shared by DM | PGSC0003DMG40003<br>8459 | PGSC0003DMT4000<br>88888 | chr10 | NO  | NO  |                                                                                                                                              |
| 2304 | Heterozygous<br>PS in RH, not<br>shared by DM | PGSC0003DMG40003<br>8520 | PGSC0003DMT4000<br>88949 | chr11 | NO  | NO  |                                                                                                                                              |
| 2305 | Heterozygous<br>PS in RH, not<br>shared by DM | PGSC0003DMG40003<br>8523 | PGSC0003DMT4000<br>88952 | chr04 | yes | NO  | GO:0008152; metabolic process;<br>Biological Process GO:0016758;<br>transferase activity, transferring hexosyl<br>groups; Molecular Function |
| 2306 | Heterozygous<br>PS in RH, not<br>shared by DM | PGSC0003DMG40003<br>8540 | PGSC0003DMT4000<br>88969 | chr01 | NO  | NO  |                                                                                                                                              |
| 2307 | Heterozygous<br>PS in RH, not<br>shared by DM | PGSC0003DMG40003<br>8554 | PGSC0003DMT4000<br>88983 | chr10 | yes | yes |                                                                                                                                              |
| 2308 | Heterozygous<br>PS in RH, not<br>shared by DM | PGSC0003DMG40003<br>8560 | PGSC0003DMT4000<br>88989 | chr08 | yes | NO  |                                                                                                                                              |
| 2309 | Heterozygous<br>PS in RH, not<br>shared by DM | PGSC0003DMG40003<br>8567 | PGSC0003DMT4000<br>88996 | chr02 | NO  | NO  |                                                                                                                                              |
| 2310 | Heterozygous<br>PS in RH, not<br>shared by DM | PGSC0003DMG40003<br>8588 | PGSC0003DMT4000<br>89017 | chr02 | yes | NO  |                                                                                                                                              |
| 2311 | Heterozygous<br>PS in RH, not<br>shared by DM | PGSC0003DMG40003<br>8596 | PGSC0003DMT4000<br>89025 | -     | NO  | NO  |                                                                                                                                              |
| 2312 | Heterozygous<br>PS in RH, not<br>shared by DM | PGSC0003DMG40003<br>8609 | PGSC0003DMT4000<br>89038 | chr11 | yes | NO  |                                                                                                                                              |

|      |                                         |                          |                          |       |     |     |                                                                                                                                                                                                                                                                                                                                                     |
|------|-----------------------------------------|--------------------------|--------------------------|-------|-----|-----|-----------------------------------------------------------------------------------------------------------------------------------------------------------------------------------------------------------------------------------------------------------------------------------------------------------------------------------------------------|
| 2313 | Heterozygous PS in RH, not shared by DM | PGSC0003DMG40003<br>8622 | PGSC0003DMT4000<br>89051 | chr12 | NO  | NO  |                                                                                                                                                                                                                                                                                                                                                     |
| 2314 | Heterozygous PS in RH, not shared by DM | PGSC0003DMG40003<br>8639 | PGSC0003DMT4000<br>89068 | chr07 | yes | NO  |                                                                                                                                                                                                                                                                                                                                                     |
| 2315 | Heterozygous PS in RH, not shared by DM | PGSC0003DMG40003<br>8641 | PGSC0003DMT4000<br>89070 | chr11 | NO  | NO  | GO:0004553; hydrolase activity, hydrolyzing O-glycosyl compounds; Molecular Function GO:0005975; carbohydrate metabolic process; Biological Process                                                                                                                                                                                                 |
| 2316 | Heterozygous PS in RH, not shared by DM | PGSC0003DMG40003<br>8646 | PGSC0003DMT4000<br>89075 | chr02 | NO  | NO  |                                                                                                                                                                                                                                                                                                                                                     |
| 2317 | Heterozygous PS in RH, not shared by DM | PGSC0003DMG40003<br>8648 | PGSC0003DMT4000<br>89077 | chr05 | yes | NO  | GO:0045735; nutrient reservoir activity; Molecular Function                                                                                                                                                                                                                                                                                         |
| 2318 | Heterozygous PS in RH, not shared by DM | PGSC0003DMG40003<br>8650 | PGSC0003DMT4000<br>89079 | chr01 | yes | yes | GO:0005506; iron ion binding; Molecular Function GO:0005783; endoplasmic reticulum; Cellular Component GO:0006633; fatty acid biosynthetic process; Biological Process GO:0016491; oxidoreductase activity; Molecular Function GO:0055114; oxidation reduction; Biological Process                                                                  |
| 2319 | Heterozygous PS in RH, not shared by DM | PGSC0003DMG40003<br>8656 | PGSC0003DMT4000<br>89085 | chr12 | yes | NO  | GO:0005524; ATP binding; Molecular Function GO:0006810; transport; Biological Process GO:0016021; integral to membrane; Cellular Component GO:0016887; ATPase activity; Molecular Function GO:0042626; ATPase activity, coupled to transmembrane movement of substances; Molecular Function GO:0055085; transmembrane transport; Biological Process |
| 2320 | Heterozygous PS in RH, not shared by DM | PGSC0003DMG40003<br>8695 | PGSC0003DMT4000<br>89124 | chr03 | NO  | NO  |                                                                                                                                                                                                                                                                                                                                                     |



|      |                                               |                          |                          |       |     |     |                                                                                                                                                                                                                                                                                             |
|------|-----------------------------------------------|--------------------------|--------------------------|-------|-----|-----|---------------------------------------------------------------------------------------------------------------------------------------------------------------------------------------------------------------------------------------------------------------------------------------------|
| 2321 | Heterozygous<br>PS in RH, not<br>shared by DM | PGSC0003DMG40003<br>8696 | PGSC0003DMT4000<br>89125 | chr08 | NO  | NO  | GO:0004497; monooxygenase activity;<br>Molecular Function GO:0005506; iron ion<br>binding; Molecular Function<br>GO:0006629; lipid metabolic process;<br>Biological Process GO:0009055; electron<br>carrier activity; Molecular Function<br>GO:0020037; heme binding; Molecular<br>Function |
| 2322 | Heterozygous<br>PS in RH, not<br>shared by DM | PGSC0003DMG40003<br>8706 | PGSC0003DMT4000<br>89135 | chr07 | NO  | NO  |                                                                                                                                                                                                                                                                                             |
| 2323 | Heterozygous<br>PS in RH, not<br>shared by DM | PGSC0003DMG40003<br>8769 | PGSC0003DMT4000<br>89198 | chr09 | NO  | NO  |                                                                                                                                                                                                                                                                                             |
| 2324 | Heterozygous<br>PS in RH, not<br>shared by DM | PGSC0003DMG40003<br>8773 | PGSC0003DMT4000<br>89202 | chr01 | yes | NO  |                                                                                                                                                                                                                                                                                             |
| 2325 | Heterozygous<br>PS in RH, not<br>shared by DM | PGSC0003DMG40003<br>8814 | PGSC0003DMT4000<br>89243 |       |     |     |                                                                                                                                                                                                                                                                                             |
| 2326 | Heterozygous<br>PS in RH, not<br>shared by DM | PGSC0003DMG40003<br>8841 | PGSC0003DMT4000<br>89270 | chr10 | yes | yes |                                                                                                                                                                                                                                                                                             |
| 2327 | Heterozygous<br>PS in RH, not<br>shared by DM | PGSC0003DMG40003<br>8863 | PGSC0003DMT4000<br>89292 | chr01 | yes | yes | GO:0004672; protein kinase activity;<br>Molecular Function GO:0005524; ATP<br>binding; Molecular Function<br>GO:0006468; protein amino acid<br>phosphorylation; Biological Process                                                                                                          |
| 2328 | Heterozygous<br>PS in RH, not<br>shared by DM | PGSC0003DMG40003<br>8872 | PGSC0003DMT4000<br>89301 | chr10 | NO  | NO  |                                                                                                                                                                                                                                                                                             |
| 2329 | Heterozygous<br>PS in RH, not<br>shared by DM | PGSC0003DMG40003<br>8894 | PGSC0003DMT4000<br>89323 | chr06 | NO  | NO  |                                                                                                                                                                                                                                                                                             |
| 2330 | Heterozygous<br>PS in RH, not<br>shared by DM | PGSC0003DMG40003<br>8991 | PGSC0003DMT4000<br>89420 | chr12 | yes | NO  |                                                                                                                                                                                                                                                                                             |

|      |                                               |                          |                          |       |     |     |                                                                                                                                                                                                                                                                                                                                                                                              |
|------|-----------------------------------------------|--------------------------|--------------------------|-------|-----|-----|----------------------------------------------------------------------------------------------------------------------------------------------------------------------------------------------------------------------------------------------------------------------------------------------------------------------------------------------------------------------------------------------|
| 2331 | Heterozygous<br>PS in RH, not<br>shared by DM | PGSC0003DMG40003<br>9002 | PGSC0003DMT4000<br>89431 | chr10 | NO  | NO  |                                                                                                                                                                                                                                                                                                                                                                                              |
| 2332 | Heterozygous<br>PS in RH, not<br>shared by DM | PGSC0003DMG40003<br>9004 | PGSC0003DMT4000<br>89433 | -     | yes | yes | GO:0016765; transferase activity,<br>transferring alkyl or aryl (other than<br>methyl) groups; Molecular Function                                                                                                                                                                                                                                                                            |
| 2333 | Heterozygous<br>PS in RH, not<br>shared by DM | PGSC0003DMG40003<br>9007 | PGSC0003DMT4000<br>89436 | chr04 | NO  | NO  |                                                                                                                                                                                                                                                                                                                                                                                              |
| 2334 | Heterozygous<br>PS in RH, not<br>shared by DM | PGSC0003DMG40003<br>9017 | PGSC0003DMT4000<br>89446 | chr01 | yes | NO  |                                                                                                                                                                                                                                                                                                                                                                                              |
| 2335 | Heterozygous<br>PS in RH, not<br>shared by DM | PGSC0003DMG40003<br>9019 | PGSC0003DMT4000<br>89448 | chr06 | NO  | NO  |                                                                                                                                                                                                                                                                                                                                                                                              |
| 2336 | Heterozygous<br>PS in RH, not<br>shared by DM | PGSC0003DMG40003<br>9048 | PGSC0003DMT4000<br>89477 | chr04 | yes | NO  |                                                                                                                                                                                                                                                                                                                                                                                              |
| 2337 | Heterozygous<br>PS in RH, not<br>shared by DM | PGSC0003DMG40003<br>9073 | PGSC0003DMT4000<br>89502 | chr03 | NO  | NO  |                                                                                                                                                                                                                                                                                                                                                                                              |
| 2338 | Heterozygous<br>PS in RH, not<br>shared by DM | PGSC0003DMG40003<br>9096 | PGSC0003DMT4000<br>89525 | chr12 | NO  | NO  |                                                                                                                                                                                                                                                                                                                                                                                              |
| 2339 | Heterozygous<br>PS in RH, not<br>shared by DM | PGSC0003DMG40003<br>9163 | PGSC0003DMT4000<br>89592 | chr09 | yes | NO  | GO:0004672; protein kinase activity;<br>Molecular Function GO:0005524; ATP<br>binding; Molecular Function<br>GO:0006468; protein amino acid<br>phosphorylation; Biological Process<br>GO:0004652; polynucleotide<br>adenyltransferase activity; Molecular<br>Function GO:0006350; transcription;<br>Biological Process GO:0016779;<br>nucleotidyltransferase activity; Molecular<br>Function |
| 2340 | Heterozygous<br>PS in RH, not<br>shared by DM | PGSC0003DMG40003<br>9165 | PGSC0003DMT4000<br>89594 | chr06 | yes | yes |                                                                                                                                                                                                                                                                                                                                                                                              |
| 2341 | Heterozygous<br>PS in RH, not<br>shared by DM | PGSC0003DMG40003<br>9182 | PGSC0003DMT4000<br>89611 | chr06 | yes | yes |                                                                                                                                                                                                                                                                                                                                                                                              |

|      |                                               |                          |                          |       |     |     |                                                                                                                                                                                                                                        |
|------|-----------------------------------------------|--------------------------|--------------------------|-------|-----|-----|----------------------------------------------------------------------------------------------------------------------------------------------------------------------------------------------------------------------------------------|
| 2342 | Heterozygous<br>PS in RH, not<br>shared by DM | PGSC0003DMG40003<br>9204 | PGSC0003DMT4000<br>89633 | -     | yes | NO  | GO:0005198; structural molecule activity;<br>Molecular Function                                                                                                                                                                        |
| 2343 | Heterozygous<br>PS in RH, not<br>shared by DM | PGSC0003DMG40003<br>9207 | PGSC0003DMT4000<br>89636 |       |     |     |                                                                                                                                                                                                                                        |
| 2344 | Heterozygous<br>PS in RH, not<br>shared by DM | PGSC0003DMG40003<br>9248 | PGSC0003DMT4000<br>89677 | chr06 | NO  | NO  |                                                                                                                                                                                                                                        |
| 2345 | Heterozygous<br>PS in RH, not<br>shared by DM | PGSC0003DMG40003<br>9256 | PGSC0003DMT4000<br>89685 | chr02 | NO  | NO  |                                                                                                                                                                                                                                        |
| 2346 | Heterozygous<br>PS in RH, not<br>shared by DM | PGSC0003DMG40003<br>9265 | PGSC0003DMT4000<br>89694 | chr07 | yes | yes |                                                                                                                                                                                                                                        |
| 2347 | Heterozygous<br>PS in RH, not<br>shared by DM | PGSC0003DMG40003<br>9272 | PGSC0003DMT4000<br>89701 | chr02 | yes | NO  | GO:0005524; ATP binding; Molecular<br>Function GO:0006915; apoptosis;<br>Biological Process                                                                                                                                            |
| 2348 | Heterozygous<br>PS in RH, not<br>shared by DM | PGSC0003DMG40003<br>9305 | PGSC0003DMT4000<br>89734 | chr04 | yes | NO  | GO:0001522; pseudouridine synthesis;<br>Biological Process GO:0003723; RNA<br>binding; Molecular Function<br>GO:0009451; RNA modification;<br>Biological Process GO:0009982;<br>pseudouridine synthase activity;<br>Molecular Function |
| 2349 | Heterozygous<br>PS in RH, not<br>shared by DM | PGSC0003DMG40003<br>9328 | PGSC0003DMT4000<br>89757 | chr10 | yes | NO  | GO:0005515; protein binding; Molecular<br>Function                                                                                                                                                                                     |
| 2350 | Heterozygous<br>PS in RH, not<br>shared by DM | PGSC0003DMG40003<br>9347 | PGSC0003DMT4000<br>89776 | chr01 | NO  | NO  |                                                                                                                                                                                                                                        |
| 2351 | Heterozygous<br>PS in RH, not<br>shared by DM | PGSC0003DMG40003<br>9360 | PGSC0003DMT4000<br>89789 | chr05 | yes | yes |                                                                                                                                                                                                                                        |

|      |                                         |                          |                          |       |     |     |                                                                                                                                                                                                                |
|------|-----------------------------------------|--------------------------|--------------------------|-------|-----|-----|----------------------------------------------------------------------------------------------------------------------------------------------------------------------------------------------------------------|
| 2352 | Heterozygous PS in RH, not shared by DM | PGSC0003DMG40003<br>9361 | PGSC0003DMT4000<br>89790 | chr02 | NO  | NO  | GO:0003735; structural constituent of ribosome; Molecular Function GO:0005622; intracellular; Cellular Component GO:0005840; ribosome; Cellular Component GO:0006412; translation; Biological Process          |
| 2353 | Heterozygous PS in RH, not shared by DM | PGSC0003DMG40003<br>9474 | PGSC0003DMT4000<br>89903 | chr11 | NO  | NO  |                                                                                                                                                                                                                |
| 2354 | Heterozygous PS in RH, not shared by DM | PGSC0003DMG40003<br>9475 | PGSC0003DMT4000<br>89904 | chr10 | NO  | NO  |                                                                                                                                                                                                                |
| 2355 | Heterozygous PS in RH, not shared by DM | PGSC0003DMG40003<br>9476 | PGSC0003DMT4000<br>89905 | chr10 | yes | yes |                                                                                                                                                                                                                |
| 2356 | Heterozygous PS in RH, not shared by DM | PGSC0003DMG40003<br>9524 | PGSC0003DMT4000<br>89953 | chr07 | yes | NO  | GO:0004497; monooxygenase activity; Molecular Function GO:0005506; iron ion binding; Molecular Function GO:0009055; electron carrier activity; Molecular Function GO:0020037; heme binding; Molecular Function |
| 2357 | Heterozygous PS in RH, not shared by DM | PGSC0003DMG40003<br>9537 | PGSC0003DMT4000<br>89966 | chr09 | yes | yes |                                                                                                                                                                                                                |
| 2358 | Heterozygous PS in RH, not shared by DM | PGSC0003DMG40003<br>9542 | PGSC0003DMT4000<br>89971 | chr02 | yes | NO  |                                                                                                                                                                                                                |
| 2359 | Heterozygous PS in RH, not shared by DM | PGSC0003DMG40003<br>9597 | PGSC0003DMT4000<br>90026 | chr05 | yes | NO  |                                                                                                                                                                                                                |
| 2360 | Heterozygous PS in RH, not shared by DM | PGSC0003DMG40003<br>9637 | PGSC0003DMT4000<br>90066 | chr12 | NO  | NO  |                                                                                                                                                                                                                |
| 2361 | Heterozygous PS in RH, not shared by DM | PGSC0003DMG40003<br>9647 | PGSC0003DMT4000<br>90076 | chr10 | NO  | NO  |                                                                                                                                                                                                                |

|      |                                               |                          |                          |       |     |     |                                                                                                                                                                                                                                                                                                                                                                                |
|------|-----------------------------------------------|--------------------------|--------------------------|-------|-----|-----|--------------------------------------------------------------------------------------------------------------------------------------------------------------------------------------------------------------------------------------------------------------------------------------------------------------------------------------------------------------------------------|
| 2362 | Heterozygous<br>PS in RH, not<br>shared by DM | PGSC0003DMG40003<br>9707 | PGSC0003DMT4000<br>90136 | chr04 | yes | NO  |                                                                                                                                                                                                                                                                                                                                                                                |
| 2363 | Heterozygous<br>PS in RH, not<br>shared by DM | PGSC0003DMG40003<br>9728 | PGSC0003DMT4000<br>90157 | chr12 | NO  | NO  |                                                                                                                                                                                                                                                                                                                                                                                |
| 2364 | Heterozygous<br>PS in RH, not<br>shared by DM | PGSC0003DMG40003<br>9732 | PGSC0003DMT4000<br>90161 | chr11 | NO  | NO  | GO:0005515; protein binding; Molecular<br>Function                                                                                                                                                                                                                                                                                                                             |
| 2365 | Heterozygous<br>PS in RH, not<br>shared by DM | PGSC0003DMG40003<br>9759 | PGSC0003DMT4000<br>90188 | chr05 | yes | yes | GO:0004650; polygalacturonase activity;<br>Molecular Function GO:0005975;<br>carbohydrate metabolic process;<br>Biological Process                                                                                                                                                                                                                                             |
| 2366 | Heterozygous<br>PS in RH, not<br>shared by DM | PGSC0003DMG40003<br>9761 | PGSC0003DMT4000<br>90190 | chr11 | yes | NO  |                                                                                                                                                                                                                                                                                                                                                                                |
| 2367 | Heterozygous<br>PS in RH, not<br>shared by DM | PGSC0003DMG40003<br>9806 | PGSC0003DMT4000<br>90235 | chr08 | yes | yes | GO:0003924; GTPase activity; Molecular<br>Function GO:0005525; GTP binding;<br>Molecular Function                                                                                                                                                                                                                                                                              |
| 2368 | Heterozygous<br>PS in RH, not<br>shared by DM | PGSC0003DMG40003<br>9811 | PGSC0003DMT4000<br>90240 | chr12 | NO  | NO  |                                                                                                                                                                                                                                                                                                                                                                                |
| 2369 | Heterozygous<br>PS in RH, not<br>shared by DM | PGSC0003DMG40003<br>9842 | PGSC0003DMT4000<br>90271 | chr11 | NO  | NO  |                                                                                                                                                                                                                                                                                                                                                                                |
| 2370 | Heterozygous<br>PS in RH, not<br>shared by DM | PGSC0003DMG40003<br>9843 | PGSC0003DMT4000<br>90272 | chr10 | NO  | NO  | GO:0005524; ATP binding; Molecular<br>Function GO:0006810; transport;<br>Biological Process GO:0016021; integral<br>to membrane; Cellular Component<br>GO:0016887; ATPase activity; Molecular<br>Function GO:0042626; ATPase activity,<br>coupled to transmembrane movement of<br>substances; Molecular Function<br>GO:0055085; transmembrane transport;<br>Biological Process |
| 2371 | Heterozygous<br>PS in RH, not<br>shared by DM | PGSC0003DMG40003<br>9845 | PGSC0003DMT4000<br>90274 | chr10 | NO  | NO  |                                                                                                                                                                                                                                                                                                                                                                                |

|      |                                               |                          |                          |       |     |     |                                                                                                                                                                            |
|------|-----------------------------------------------|--------------------------|--------------------------|-------|-----|-----|----------------------------------------------------------------------------------------------------------------------------------------------------------------------------|
| 2372 | Heterozygous<br>PS in RH, not<br>shared by DM | PGSC0003DMG40003<br>9874 | PGSC0003DMT4000<br>90303 | chr02 | yes | yes |                                                                                                                                                                            |
| 2373 | Heterozygous<br>PS in RH, not<br>shared by DM | PGSC0003DMG40003<br>9878 | PGSC0003DMT4000<br>90307 | chr09 | yes | NO  | GO:0005515; protein binding; Molecular<br>Function                                                                                                                         |
| 2374 | Heterozygous<br>PS in RH, not<br>shared by DM | PGSC0003DMG40003<br>9917 | PGSC0003DMT4000<br>90346 | chr05 | yes | yes |                                                                                                                                                                            |
| 2375 | Heterozygous<br>PS in RH, not<br>shared by DM | PGSC0003DMG40003<br>9921 | PGSC0003DMT4000<br>90350 | chr08 | yes | yes |                                                                                                                                                                            |
| 2376 | Heterozygous<br>PS in RH, not<br>shared by DM | PGSC0003DMG40003<br>9982 | PGSC0003DMT4000<br>90411 | chr07 | yes | yes |                                                                                                                                                                            |
| 2377 | Heterozygous<br>PS in RH, not<br>shared by DM | PGSC0003DMG40003<br>9985 | PGSC0003DMT4000<br>90414 | chr05 | yes | NO  | GO:0004252; serine-type endopeptidase<br>activity; Molecular Function<br>GO:0006508; proteolysis; Biological<br>Process                                                    |
| 2378 | Heterozygous<br>PS in RH, not<br>shared by DM | PGSC0003DMG40004<br>0003 | PGSC0003DMT4000<br>90432 |       |     |     |                                                                                                                                                                            |
| 2379 | Heterozygous<br>PS in RH, not<br>shared by DM | PGSC0003DMG40004<br>0009 | PGSC0003DMT4000<br>90438 | chr06 | NO  | NO  |                                                                                                                                                                            |
| 2380 | Heterozygous<br>PS in RH, not<br>shared by DM | PGSC0003DMG40004<br>0029 | PGSC0003DMT4000<br>90458 | chr07 | yes | yes | GO:0005507; copper ion binding;<br>Molecular Function GO:0016491;<br>oxidoreductase activity; Molecular<br>Function GO:0055114; oxidation<br>reduction; Biological Process |
| 2381 | Heterozygous<br>PS in RH, not<br>shared by DM | PGSC0003DMG40004<br>0071 | PGSC0003DMT4000<br>90500 | chr02 | NO  | NO  |                                                                                                                                                                            |
| 2382 | Heterozygous<br>PS in RH, not<br>shared by DM | PGSC0003DMG40004<br>0094 | PGSC0003DMT4000<br>90523 | chr11 | NO  | NO  |                                                                                                                                                                            |

|      |                                               |                          |                          |       |     |     |                                                                                                                                                                                                                                                                                                                              |
|------|-----------------------------------------------|--------------------------|--------------------------|-------|-----|-----|------------------------------------------------------------------------------------------------------------------------------------------------------------------------------------------------------------------------------------------------------------------------------------------------------------------------------|
| 2383 | Heterozygous<br>PS in RH, not<br>shared by DM | PGSC0003DMG40004<br>0102 | PGSC0003DMT4000<br>90531 | chr03 | yes | yes | GO:0003677; DNA binding; Molecular<br>Function GO:0003700; transcription<br>factor activity; Molecular Function<br>GO:0006352; transcription initiation;<br>Biological Process GO:0006355;<br>regulation of transcription, DNA-<br>dependent; Biological Process<br>GO:0016987; sigma factor activity;<br>Molecular Function |
| 2384 | Heterozygous<br>PS in RH, not<br>shared by DM | PGSC0003DMG40004<br>0109 | PGSC0003DMT4000<br>90538 | chr08 | yes | yes | GO:0005737; cytoplasm; Cellular<br>Component GO:0008119; thiopurine S-<br>methyltransferase activity; Molecular<br>Function GO:0008152; metabolic process;<br>Biological Process                                                                                                                                             |
| 2385 | Heterozygous<br>PS in RH, not<br>shared by DM | PGSC0003DMG40004<br>0121 | PGSC0003DMT4000<br>90550 | chr05 | yes | NO  |                                                                                                                                                                                                                                                                                                                              |
| 2386 | Heterozygous<br>PS in RH, not<br>shared by DM | PGSC0003DMG40004<br>0141 | PGSC0003DMT4000<br>90570 | chr06 | yes | NO  | GO:0004497; monooxygenase activity;<br>Molecular Function GO:0005506; iron ion<br>binding; Molecular Function<br>GO:0009055; electron carrier activity;<br>Molecular Function GO:0020037; heme<br>binding; Molecular Function                                                                                                |
| 2387 | Heterozygous<br>PS in RH, not<br>shared by DM | PGSC0003DMG40004<br>0149 | PGSC0003DMT4000<br>90578 | chr01 | NO  | NO  | GO:0005524; ATP binding; Molecular<br>Function GO:0006915; apoptosis;<br>Biological Process                                                                                                                                                                                                                                  |
| 2388 | Heterozygous<br>PS in RH, not<br>shared by DM | PGSC0003DMG40004<br>0152 | PGSC0003DMT4000<br>90581 | chr12 | NO  | NO  |                                                                                                                                                                                                                                                                                                                              |
| 2389 | Heterozygous<br>PS in RH, not<br>shared by DM | PGSC0003DMG40004<br>0177 | PGSC0003DMT4000<br>90606 | chr11 | yes | NO  | GO:0016021; integral to membrane;<br>Cellular Component                                                                                                                                                                                                                                                                      |
| 2390 | Heterozygous<br>PS in RH, not<br>shared by DM | PGSC0003DMG40004<br>0207 | PGSC0003DMT4000<br>90636 | chr07 | NO  | NO  |                                                                                                                                                                                                                                                                                                                              |
| 2391 | Heterozygous<br>PS in RH, not<br>shared by DM | PGSC0003DMG40004<br>0271 | PGSC0003DMT4000<br>90700 | chr03 | yes | NO  |                                                                                                                                                                                                                                                                                                                              |

|      |                                               |                          |                          |       |     |     |                                                                                                                                                                                    |
|------|-----------------------------------------------|--------------------------|--------------------------|-------|-----|-----|------------------------------------------------------------------------------------------------------------------------------------------------------------------------------------|
| 2392 | Heterozygous<br>PS in RH, not<br>shared by DM | PGSC0003DMG40004<br>0283 | PGSC0003DMT4000<br>90712 | chr11 | yes | NO  |                                                                                                                                                                                    |
| 2393 | Heterozygous<br>PS in RH, not<br>shared by DM | PGSC0003DMG40004<br>0293 | PGSC0003DMT4000<br>90722 | chr03 | yes | yes | GO:0005524; ATP binding; Molecular<br>Function                                                                                                                                     |
| 2394 | Heterozygous<br>PS in RH, not<br>shared by DM | PGSC0003DMG40004<br>0297 | PGSC0003DMT4000<br>90726 | chr05 | NO  | NO  |                                                                                                                                                                                    |
| 2395 | Heterozygous<br>PS in RH, not<br>shared by DM | PGSC0003DMG40004<br>0313 | PGSC0003DMT4000<br>90742 | chr02 | yes | yes |                                                                                                                                                                                    |
| 2396 | Heterozygous<br>PS in RH, not<br>shared by DM | PGSC0003DMG40004<br>0320 | PGSC0003DMT4000<br>90749 | chr06 | yes | yes | GO:0005515; protein binding; Molecular<br>Function GO:0006915; apoptosis;<br>Biological Process                                                                                    |
| 2397 | Heterozygous<br>PS in RH, not<br>shared by DM | PGSC0003DMG40004<br>0327 | PGSC0003DMT4000<br>90756 | chr06 | NO  | NO  |                                                                                                                                                                                    |
| 2398 | Heterozygous<br>PS in RH, not<br>shared by DM | PGSC0003DMG40004<br>0353 | PGSC0003DMT4000<br>90782 | chr07 | NO  | NO  | GO:0016791; phosphatase activity;<br>Molecular Function                                                                                                                            |
| 2399 | Heterozygous<br>PS in RH, not<br>shared by DM | PGSC0003DMG40004<br>0407 | PGSC0003DMT4000<br>90836 | chr11 | yes | NO  | GO:0004672; protein kinase activity;<br>Molecular Function GO:0005524; ATP<br>binding; Molecular Function<br>GO:0006468; protein amino acid<br>phosphorylation; Biological Process |
| 2400 | Heterozygous<br>PS in RH, not<br>shared by DM | PGSC0003DMG40004<br>0427 | PGSC0003DMT4000<br>90856 | chr12 | yes | NO  |                                                                                                                                                                                    |
| 2401 | Heterozygous<br>PS in RH, not<br>shared by DM | PGSC0003DMG40004<br>0439 | PGSC0003DMT4000<br>90868 | -     | NO  | NO  |                                                                                                                                                                                    |
| 2402 | Heterozygous<br>PS in RH, not<br>shared by DM | PGSC0003DMG40004<br>0448 | PGSC0003DMT4000<br>90877 | chr06 | NO  | NO  |                                                                                                                                                                                    |
| 2403 | Heterozygous<br>PS in RH, not<br>shared by DM | PGSC0003DMG40004<br>0494 | PGSC0003DMT4000<br>90923 | -     | NO  | NO  |                                                                                                                                                                                    |



|      |                                               |                          |                          |       |     |     |                                                                                                                                                                                                                                                                     |
|------|-----------------------------------------------|--------------------------|--------------------------|-------|-----|-----|---------------------------------------------------------------------------------------------------------------------------------------------------------------------------------------------------------------------------------------------------------------------|
| 2404 | Heterozygous<br>PS in RH, not<br>shared by DM | PGSC0003DMG40004<br>0499 | PGSC0003DMT4000<br>90928 | chr04 | NO  | NO  |                                                                                                                                                                                                                                                                     |
| 2405 | Heterozygous<br>PS in RH, not<br>shared by DM | PGSC0003DMG40004<br>0546 | PGSC0003DMT4000<br>90975 | -     | yes | NO  | GO:0004672; protein kinase activity;<br>Molecular Function GO:0005524; ATP<br>binding; Molecular Function<br>GO:0006355; regulation of transcription,<br>DNA-dependent; Biological Process<br>GO:0006468; protein amino acid<br>phosphorylation; Biological Process |
| 2406 | Heterozygous<br>PS in RH, not<br>shared by DM | PGSC0003DMG40004<br>0597 | PGSC0003DMT4000<br>91026 | chr10 | yes | yes |                                                                                                                                                                                                                                                                     |
| 2407 | Heterozygous<br>PS in RH, not<br>shared by DM | PGSC0003DMG40004<br>0684 | PGSC0003DMT4000<br>91113 | chr10 | NO  | NO  |                                                                                                                                                                                                                                                                     |
| 2408 | Heterozygous<br>PS in RH, not<br>shared by DM | PGSC0003DMG40004<br>0723 | PGSC0003DMT4000<br>91152 | chr04 | NO  | NO  |                                                                                                                                                                                                                                                                     |
| 2409 | Heterozygous<br>PS in RH, not<br>shared by DM | PGSC0003DMG40004<br>0754 | PGSC0003DMT4000<br>91183 | chr12 | NO  | NO  |                                                                                                                                                                                                                                                                     |
| 2410 | Heterozygous<br>PS in RH, not<br>shared by DM | PGSC0003DMG40004<br>0763 | PGSC0003DMT4000<br>91192 | chr12 | yes | NO  | GO:0005515; protein binding; Molecular<br>Function GO:0005524; ATP binding;<br>Molecular Function GO:0006915;<br>apoptosis; Biological Process                                                                                                                      |
| 2411 | Heterozygous<br>PS in RH, not<br>shared by DM | PGSC0003DMG40004<br>0768 | PGSC0003DMT4000<br>91197 | -     | yes | yes | GO:0004601; peroxidase activity;<br>Molecular Function GO:0006979;<br>response to oxidative stress; Biological<br>Process GO:0020037; heme binding;<br>Molecular Function GO:0055114;<br>oxidation reduction; Biological Process                                    |
| 2412 | Heterozygous<br>PS in RH, not<br>shared by DM | PGSC0003DMG40004<br>0770 | PGSC0003DMT4000<br>91199 | chr01 | yes | NO  |                                                                                                                                                                                                                                                                     |

|      |                                               |                          |                          |       |     |     |                                                                                                                            |
|------|-----------------------------------------------|--------------------------|--------------------------|-------|-----|-----|----------------------------------------------------------------------------------------------------------------------------|
| 2413 | Heterozygous<br>PS in RH, not<br>shared by DM | PGSC0003DMG40004<br>0815 | PGSC0003DMT4000<br>91244 | chr03 | yes | yes | GO:0009055; electron carrier activity;<br>Molecular Function GO:0016491;<br>oxidoreductase activity; Molecular<br>Function |
| 2414 | Heterozygous<br>PS in RH, not<br>shared by DM | PGSC0003DMG40004<br>0947 | PGSC0003DMT4000<br>91376 | chr05 | yes | yes |                                                                                                                            |
| 2415 | Heterozygous<br>PS in RH, not<br>shared by DM | PGSC0003DMG40004<br>0948 | PGSC0003DMT4000<br>91377 | -     | yes | NO  |                                                                                                                            |
| 2416 | Heterozygous<br>PS in RH, not<br>shared by DM | PGSC0003DMG40004<br>0961 | PGSC0003DMT4000<br>91390 | chr04 | NO  | NO  |                                                                                                                            |
| 2417 | Heterozygous<br>PS in RH, not<br>shared by DM | PGSC0003DMG40004<br>1006 | PGSC0003DMT4000<br>91435 | chr07 | yes | NO  |                                                                                                                            |
| 2418 | Heterozygous<br>PS in RH, not<br>shared by DM | PGSC0003DMG40004<br>1016 | PGSC0003DMT4000<br>91445 | chr11 | yes | NO  |                                                                                                                            |
| 2419 | Heterozygous<br>PS in RH, not<br>shared by DM | PGSC0003DMG40004<br>1023 | PGSC0003DMT4000<br>91452 | chr05 | NO  | NO  |                                                                                                                            |
| 2420 | Heterozygous<br>PS in RH, not<br>shared by DM | PGSC0003DMG40004<br>1052 | PGSC0003DMT4000<br>91481 | chr12 | yes | NO  |                                                                                                                            |
| 2421 | Heterozygous<br>PS in RH, not<br>shared by DM | PGSC0003DMG40004<br>1053 | PGSC0003DMT4000<br>91482 | chr02 | NO  | NO  |                                                                                                                            |
| 2422 | Heterozygous<br>PS in RH, not<br>shared by DM | PGSC0003DMG40004<br>1099 | PGSC0003DMT4000<br>91528 | chr12 | NO  | NO  |                                                                                                                            |
| 2423 | Heterozygous<br>PS in RH, not<br>shared by DM | PGSC0003DMG40004<br>1123 | PGSC0003DMT4000<br>91552 | chr10 | yes | NO  |                                                                                                                            |

|      |                                               |                          |                          |       |     |     |                                                                                                                                                                                                                                                                                                                                                                                |
|------|-----------------------------------------------|--------------------------|--------------------------|-------|-----|-----|--------------------------------------------------------------------------------------------------------------------------------------------------------------------------------------------------------------------------------------------------------------------------------------------------------------------------------------------------------------------------------|
| 2424 | Heterozygous<br>PS in RH, not<br>shared by DM | PGSC0003DMG40004<br>1131 | PGSC0003DMT4000<br>91560 | chr03 | yes | NO  | GO:0004672; protein kinase activity;<br>Molecular Function GO:0005515; protein<br>binding; Molecular Function<br>GO:0005524; ATP binding; Molecular<br>Function GO:0006468; protein amino acid<br>phosphorylation; Biological Process                                                                                                                                          |
| 2425 | Heterozygous<br>PS in RH, not<br>shared by DM | PGSC0003DMG40004<br>1140 | PGSC0003DMT4000<br>91569 | chr01 | yes | NO  |                                                                                                                                                                                                                                                                                                                                                                                |
| 2426 | Heterozygous<br>PS in RH, not<br>shared by DM | PGSC0003DMG40004<br>1147 | PGSC0003DMT4000<br>91576 | chr12 | NO  | NO  |                                                                                                                                                                                                                                                                                                                                                                                |
| 2427 | Heterozygous<br>PS in RH, not<br>shared by DM | PGSC0003DMG40004<br>1172 | PGSC0003DMT4000<br>91601 | chr08 | yes | NO  | GO:0003700; transcription factor activity;<br>Molecular Function GO:0006355;<br>regulation of transcription, DNA-<br>dependent; Biological Process                                                                                                                                                                                                                             |
| 2428 | Heterozygous<br>PS in RH, not<br>shared by DM | PGSC0003DMG40004<br>1182 | PGSC0003DMT4000<br>91611 | chr09 | NO  | NO  |                                                                                                                                                                                                                                                                                                                                                                                |
| 2429 | Heterozygous<br>PS in RH, not<br>shared by DM | PGSC0003DMG40004<br>1187 | PGSC0003DMT4000<br>91616 | chr05 | yes | yes | GO:0008146; sulfotransferase activity;<br>Molecular Function                                                                                                                                                                                                                                                                                                                   |
| 2430 | Heterozygous<br>PS in RH, not<br>shared by DM | PGSC0003DMG40004<br>1198 | PGSC0003DMT4000<br>91627 | chr09 | yes | yes | GO:0005515; protein binding; Molecular<br>Function                                                                                                                                                                                                                                                                                                                             |
| 2431 | Heterozygous<br>PS in RH, not<br>shared by DM | PGSC0003DMG40004<br>1202 | PGSC0003DMT4000<br>91631 | chr11 | yes | NO  | GO:0005524; ATP binding; Molecular<br>Function GO:0006810; transport;<br>Biological Process GO:0016021; integral<br>to membrane; Cellular Component<br>GO:0016887; ATPase activity; Molecular<br>Function GO:0042626; ATPase activity,<br>coupled to transmembrane movement of<br>substances; Molecular Function<br>GO:0055085; transmembrane transport;<br>Biological Process |

|      |                                               |                          |                          |       |     |    |                                                                                                                                                                                                                                                                                                                                                                                     |
|------|-----------------------------------------------|--------------------------|--------------------------|-------|-----|----|-------------------------------------------------------------------------------------------------------------------------------------------------------------------------------------------------------------------------------------------------------------------------------------------------------------------------------------------------------------------------------------|
| 2432 | Heterozygous<br>PS in RH, not<br>shared by DM | PGSC0003DMG40004<br>1267 | PGSC0003DMT4000<br>91696 | chr10 | yes | NO | GO:0004497; monooxygenase activity;<br>Molecular Function GO:0005506; iron ion<br>binding; Molecular Function<br>GO:0009055; electron carrier activity;<br>Molecular Function GO:0020037; heme<br>binding; Molecular Function                                                                                                                                                       |
| 2433 | Heterozygous<br>PS in RH, not<br>shared by DM | PGSC0003DMG40004<br>1281 | PGSC0003DMT4000<br>91710 | chr04 | NO  | NO |                                                                                                                                                                                                                                                                                                                                                                                     |
| 2434 | Heterozygous<br>PS in RH, not<br>shared by DM | PGSC0003DMG40004<br>1297 | PGSC0003DMT4000<br>91726 | chr11 | yes | NO | GO:0005515; protein binding; Molecular<br>Function                                                                                                                                                                                                                                                                                                                                  |
| 2435 | Heterozygous<br>PS in RH, not<br>shared by DM | PGSC0003DMG40004<br>1312 | PGSC0003DMT4000<br>91741 | chr11 | NO  | NO |                                                                                                                                                                                                                                                                                                                                                                                     |
| 2436 | Heterozygous<br>PS in RH, not<br>shared by DM | PGSC0003DMG40004<br>1329 | PGSC0003DMT4000<br>91758 | chr08 | NO  | NO | GO:0004252; serine-type endopeptidase<br>activity; Molecular Function<br>GO:0006508; proteolysis; Biological<br>Process                                                                                                                                                                                                                                                             |
| 2437 | Heterozygous<br>PS in RH, not<br>shared by DM | PGSC0003DMG40004<br>1330 | PGSC0003DMT4000<br>91759 | chr06 | yes | NO | GO:0000151; ubiquitin ligase complex;<br>Cellular Component GO:0004672; protein<br>kinase activity; Molecular Function<br>GO:0004842; ubiquitin-protein ligase<br>activity; Molecular Function<br>GO:0005524; ATP binding; Molecular<br>Function GO:0006468; protein amino acid<br>phosphorylation; Biological Process<br>GO:0016567; protein ubiquitination;<br>Biological Process |
| 2438 | Heterozygous<br>PS in RH, not<br>shared by DM | PGSC0003DMG40004<br>1356 | PGSC0003DMT4000<br>91785 | chr11 | yes | NO |                                                                                                                                                                                                                                                                                                                                                                                     |
| 2439 | Heterozygous<br>PS in RH, not<br>shared by DM | PGSC0003DMG40004<br>1444 | PGSC0003DMT4000<br>91873 | chr01 | NO  | NO |                                                                                                                                                                                                                                                                                                                                                                                     |
| 2440 | Heterozygous<br>PS in RH, not<br>shared by DM | PGSC0003DMG40004<br>1455 | PGSC0003DMT4000<br>91884 | chr06 | NO  | NO |                                                                                                                                                                                                                                                                                                                                                                                     |

|      |                                               |                          |                          |       |     |     |                                                                                                                                                                                                                                  |
|------|-----------------------------------------------|--------------------------|--------------------------|-------|-----|-----|----------------------------------------------------------------------------------------------------------------------------------------------------------------------------------------------------------------------------------|
| 2441 | Heterozygous<br>PS in RH, not<br>shared by DM | PGSC0003DMG40004<br>1620 | PGSC0003DMT4000<br>92049 | chr08 | NO  | NO  |                                                                                                                                                                                                                                  |
| 2442 | Heterozygous<br>PS in RH, not<br>shared by DM | PGSC0003DMG40004<br>1631 | PGSC0003DMT4000<br>92060 | chr09 | NO  | NO  |                                                                                                                                                                                                                                  |
| 2443 | Heterozygous<br>PS in RH, not<br>shared by DM | PGSC0003DMG40004<br>1636 | PGSC0003DMT4000<br>92065 | chr01 | yes | NO  | GO:0005515; protein binding; Molecular<br>Function GO:0005524; ATP binding;<br>Molecular Function GO:0006915;<br>apoptosis; Biological Process                                                                                   |
| 2444 | Heterozygous<br>PS in RH, not<br>shared by DM | PGSC0003DMG40004<br>1644 | PGSC0003DMT4000<br>92073 | chr12 | yes | NO  |                                                                                                                                                                                                                                  |
| 2445 | Heterozygous<br>PS in RH, not<br>shared by DM | PGSC0003DMG40004<br>1674 | PGSC0003DMT4000<br>92103 | chr02 | yes | NO  | GO:0004601; peroxidase activity;<br>Molecular Function GO:0006979;<br>response to oxidative stress; Biological<br>Process GO:0020037; heme binding;<br>Molecular Function GO:0055114;<br>oxidation reduction; Biological Process |
| 2446 | Heterozygous<br>PS in RH, not<br>shared by DM | PGSC0003DMG40004<br>1679 | PGSC0003DMT4000<br>92108 | chr12 | yes | NO  |                                                                                                                                                                                                                                  |
| 2447 | Heterozygous<br>PS in RH, not<br>shared by DM | PGSC0003DMG40004<br>1685 | PGSC0003DMT4000<br>92114 | chr03 | yes | yes | GO:0006486; protein amino acid<br>glycosylation; Biological Process<br>GO:0008378; galactosyltransferase<br>activity; Molecular Function<br>GO:0016020; membrane; Cellular<br>Component                                          |
| 2448 | Heterozygous<br>PS in RH, not<br>shared by DM | PGSC0003DMG40004<br>1698 | PGSC0003DMT4000<br>92127 | chr01 | yes | NO  |                                                                                                                                                                                                                                  |
| 2449 | Heterozygous<br>PS in RH, not<br>shared by DM | PGSC0003DMG40004<br>1710 | PGSC0003DMT4000<br>92139 | chr01 | yes | yes |                                                                                                                                                                                                                                  |

|      |                                         |                          |                          |       |     |    |                                                                                                                                                                                                                                                                                                              |
|------|-----------------------------------------|--------------------------|--------------------------|-------|-----|----|--------------------------------------------------------------------------------------------------------------------------------------------------------------------------------------------------------------------------------------------------------------------------------------------------------------|
| 2450 | Heterozygous PS in RH, not shared by DM | PGSC0003DMG40004<br>1730 | PGSC0003DMT4000<br>92159 | -     | yes | NO | GO:0003824; catalytic activity; Molecular Function GO:0004086; carbamoyl-phosphate synthase activity; Molecular Function GO:0005524; ATP binding; Molecular Function GO:0006807; nitrogen compound metabolic process; Biological Process GO:0008152; metabolic process; Biological Process                   |
| 2451 | Heterozygous PS in RH, not shared by DM | PGSC0003DMG40004<br>1737 | PGSC0003DMT4000<br>92166 | chr01 | NO  | NO |                                                                                                                                                                                                                                                                                                              |
| 2452 | Heterozygous PS in RH, not shared by DM | PGSC0003DMG40004<br>1788 | PGSC0003DMT4000<br>92217 | chr12 | yes | NO |                                                                                                                                                                                                                                                                                                              |
| 2453 | Heterozygous PS in RH, not shared by DM | PGSC0003DMG40004<br>1790 | PGSC0003DMT4000<br>92219 | chr05 | NO  | NO | GO:0004672; protein kinase activity; Molecular Function GO:0005524; ATP binding; Molecular Function GO:0006468; protein amino acid phosphorylation; Biological Process GO:0005515; protein binding; Molecular Function GO:0005524; ATP binding; Molecular Function GO:0006915; apoptosis; Biological Process |
| 2454 | Heterozygous PS in RH, not shared by DM | PGSC0003DMG40004<br>1804 | PGSC0003DMT4000<br>92233 | chr01 | yes | NO |                                                                                                                                                                                                                                                                                                              |
| 2455 | Heterozygous PS in RH, not shared by DM | PGSC0003DMG40004<br>1837 | PGSC0003DMT4000<br>92266 | chr04 | NO  | NO |                                                                                                                                                                                                                                                                                                              |
| 2456 | Heterozygous PS in RH, not shared by DM | PGSC0003DMG40004<br>1853 | PGSC0003DMT4000<br>92282 | chr02 | yes | NO |                                                                                                                                                                                                                                                                                                              |
| 2457 | Heterozygous PS in RH, not shared by DM | PGSC0003DMG40004<br>2055 | PGSC0003DMT4000<br>92484 | chr05 | yes | NO | GO:0003676; nucleic acid binding; Molecular Function GO:0004523; ribonuclease H activity; Molecular Function                                                                                                                                                                                                 |
| 2458 | Heterozygous PS in RH, not shared by DM | PGSC0003DMG40004<br>2060 | PGSC0003DMT4000<br>92489 | chr04 | yes | NO | GO:0015031; protein transport; Biological Process                                                                                                                                                                                                                                                            |

|      |                                               |                          |                          |       |     |     |                                                                                                                                                                                                                    |
|------|-----------------------------------------------|--------------------------|--------------------------|-------|-----|-----|--------------------------------------------------------------------------------------------------------------------------------------------------------------------------------------------------------------------|
| 2459 | Heterozygous<br>PS in RH, not<br>shared by DM | PGSC0003DMG40004<br>2065 | PGSC0003DMT4000<br>92494 | chr07 | NO  | NO  |                                                                                                                                                                                                                    |
| 2460 | Heterozygous<br>PS in RH, not<br>shared by DM | PGSC0003DMG40004<br>2114 | PGSC0003DMT4000<br>92543 | chr01 | yes | NO  |                                                                                                                                                                                                                    |
| 2461 | Heterozygous<br>PS in RH, not<br>shared by DM | PGSC0003DMG40004<br>2130 | PGSC0003DMT4000<br>92559 | chr10 | NO  | NO  | GO:0003924; GTPase activity; Molecular<br>Function GO:0005525; GTP binding;<br>Molecular Function                                                                                                                  |
| 2462 | Heterozygous<br>PS in RH, not<br>shared by DM | PGSC0003DMG40004<br>2143 | PGSC0003DMT4000<br>92572 | chr04 | NO  | NO  |                                                                                                                                                                                                                    |
| 2463 | Heterozygous<br>PS in RH, not<br>shared by DM | PGSC0003DMG40004<br>2170 | PGSC0003DMT4000<br>92599 | chr04 | yes | NO  | GO:0005515; protein binding; Molecular<br>Function                                                                                                                                                                 |
| 2464 | Heterozygous<br>PS in RH, not<br>shared by DM | PGSC0003DMG40004<br>2192 | PGSC0003DMT4000<br>92621 | chr06 | yes | yes | GO:0004970; ionotropic glutamate<br>receptor activity; Molecular Function<br>GO:0005234; extracellular-glutamate-<br>gated ion channel activity; Molecular<br>Function GO:0016020; membrane;<br>Cellular Component |
| 2465 | Heterozygous<br>PS in RH, not<br>shared by DM | PGSC0003DMG40004<br>2205 | PGSC0003DMT4000<br>92634 | chr07 | yes | NO  |                                                                                                                                                                                                                    |
| 2466 | Heterozygous<br>PS in RH, not<br>shared by DM | PGSC0003DMG40004<br>2223 | PGSC0003DMT4000<br>92652 | chr05 | NO  | NO  |                                                                                                                                                                                                                    |
| 2467 | Heterozygous<br>PS in RH, not<br>shared by DM | PGSC0003DMG40004<br>2224 | PGSC0003DMT4000<br>92653 | chr01 | yes | NO  |                                                                                                                                                                                                                    |
| 2468 | Heterozygous<br>PS in RH, not<br>shared by DM | PGSC0003DMG40004<br>2283 | PGSC0003DMT4000<br>92712 | chr12 | NO  | NO  |                                                                                                                                                                                                                    |
| 2469 | Heterozygous<br>PS in RH, not<br>shared by DM | PGSC0003DMG40004<br>2286 | PGSC0003DMT4000<br>92715 | chr06 | yes | NO  |                                                                                                                                                                                                                    |

|      |                                               |                          |                          |       |     |     |                                                                                                                                                      |
|------|-----------------------------------------------|--------------------------|--------------------------|-------|-----|-----|------------------------------------------------------------------------------------------------------------------------------------------------------|
| 2470 | Heterozygous<br>PS in RH, not<br>shared by DM | PGSC0003DMG40004<br>2379 | PGSC0003DMT4000<br>92808 | chr11 | NO  | NO  | GO:0003700; transcription factor activity;<br>Molecular Function GO:0006355;<br>regulation of transcription, DNA-<br>dependent; Biological Process   |
| 2471 | Heterozygous<br>PS in RH, not<br>shared by DM | PGSC0003DMG40004<br>2402 | PGSC0003DMT4000<br>92831 | chr04 | yes | NO  |                                                                                                                                                      |
| 2472 | Heterozygous<br>PS in RH, not<br>shared by DM | PGSC0003DMG40004<br>2405 | PGSC0003DMT4000<br>92834 | chr07 | yes | yes | GO:0006071; glycerol metabolic process;<br>Biological Process GO:0008889;<br>glycerophosphodiester phosphodiesterase<br>activity; Molecular Function |
| 2473 | Heterozygous<br>PS in RH, not<br>shared by DM | PGSC0003DMG40004<br>2422 | PGSC0003DMT4000<br>92851 | chr09 | NO  | NO  |                                                                                                                                                      |
| 2474 | Heterozygous<br>PS in RH, not<br>shared by DM | PGSC0003DMG40004<br>2425 | PGSC0003DMT4000<br>92854 | chr06 | NO  | NO  |                                                                                                                                                      |
| 2475 | Heterozygous<br>PS in RH, not<br>shared by DM | PGSC0003DMG40004<br>2434 | PGSC0003DMT4000<br>92863 | chr02 | yes | NO  |                                                                                                                                                      |
| 2476 | Heterozygous<br>PS in RH, not<br>shared by DM | PGSC0003DMG40004<br>2439 | PGSC0003DMT4000<br>92868 | chr06 | NO  | NO  |                                                                                                                                                      |
| 2477 | Heterozygous<br>PS in RH, not<br>shared by DM | PGSC0003DMG40004<br>2480 | PGSC0003DMT4000<br>92909 | chr06 | yes | NO  |                                                                                                                                                      |
| 2478 | Heterozygous<br>PS in RH, not<br>shared by DM | PGSC0003DMG40004<br>2484 | PGSC0003DMT4000<br>92913 | chr06 | yes | NO  | GO:0045454; cell redox homeostasis;<br>Biological Process                                                                                            |
| 2479 | Heterozygous<br>PS in RH, not<br>shared by DM | PGSC0003DMG40004<br>2520 | PGSC0003DMT4000<br>92949 | chr07 | yes | NO  |                                                                                                                                                      |



|      |                                               |                          |                          |       |     |     |                                                                                                                                                                                                                                                              |
|------|-----------------------------------------------|--------------------------|--------------------------|-------|-----|-----|--------------------------------------------------------------------------------------------------------------------------------------------------------------------------------------------------------------------------------------------------------------|
| 2480 | Heterozygous<br>PS in RH, not<br>shared by DM | PGSC0003DMG40004<br>2529 | PGSC0003DMT4000<br>92958 | chr06 | yes | NO  | GO:0004427; inorganic diphosphatase<br>activity; Molecular Function<br>GO:0009678; hydrogen-translocating<br>pyrophosphatase activity; Molecular<br>Function GO:0015992; proton transport;<br>Biological Process GO:0016020;<br>membrane; Cellular Component |
| 2481 | Heterozygous<br>PS in RH, not<br>shared by DM | PGSC0003DMG40004<br>2545 | PGSC0003DMT4000<br>92974 | chr03 | yes | yes |                                                                                                                                                                                                                                                              |
| 2482 | Heterozygous<br>PS in RH, not<br>shared by DM | PGSC0003DMG40004<br>2551 | PGSC0003DMT4000<br>92980 | chr10 | NO  | NO  |                                                                                                                                                                                                                                                              |
| 2483 | Heterozygous<br>PS in RH, not<br>shared by DM | PGSC0003DMG40004<br>2570 | PGSC0003DMT4000<br>92999 | chr01 | NO  | NO  |                                                                                                                                                                                                                                                              |
| 2484 | Heterozygous<br>PS in RH, not<br>shared by DM | PGSC0003DMG40004<br>2588 | PGSC0003DMT4000<br>93017 | chr06 | NO  | NO  |                                                                                                                                                                                                                                                              |
| 2485 | Heterozygous<br>PS in RH, not<br>shared by DM | PGSC0003DMG40004<br>2589 | PGSC0003DMT4000<br>93018 | chr10 | NO  | NO  |                                                                                                                                                                                                                                                              |
| 2486 | Heterozygous<br>PS in RH, not<br>shared by DM | PGSC0003DMG40004<br>2602 | PGSC0003DMT4000<br>93031 | chr11 | NO  | NO  | GO:0010181; FMN binding; Molecular<br>Function GO:0016491; oxidoreductase<br>activity; Molecular Function                                                                                                                                                    |
| 2487 | Heterozygous<br>PS in RH, not<br>shared by DM | PGSC0003DMG40004<br>2630 | PGSC0003DMT4000<br>93059 | chr12 | yes | NO  |                                                                                                                                                                                                                                                              |
| 2488 | Heterozygous<br>PS in RH, not<br>shared by DM | PGSC0003DMG40004<br>2633 | PGSC0003DMT4000<br>93062 |       |     |     |                                                                                                                                                                                                                                                              |
| 2489 | Heterozygous<br>PS in RH, not<br>shared by DM | PGSC0003DMG40004<br>2643 | PGSC0003DMT4000<br>93072 | chr10 | yes | NO  |                                                                                                                                                                                                                                                              |
| 2490 | Heterozygous<br>PS in RH, not<br>shared by DM | PGSC0003DMG40004<br>2645 | PGSC0003DMT4000<br>93074 | chr05 | yes | NO  |                                                                                                                                                                                                                                                              |

|      |                                               |                          |                          |       |     |     |                                                                                             |
|------|-----------------------------------------------|--------------------------|--------------------------|-------|-----|-----|---------------------------------------------------------------------------------------------|
| 2491 | Heterozygous<br>PS in RH, not<br>shared by DM | PGSC0003DMG40004<br>2646 | PGSC0003DMT4000<br>93075 | -     | yes | yes |                                                                                             |
| 2492 | Heterozygous<br>PS in RH, not<br>shared by DM | PGSC0003DMG40004<br>2664 | PGSC0003DMT4000<br>93093 | chr12 | NO  | NO  |                                                                                             |
| 2493 | Heterozygous<br>PS in RH, not<br>shared by DM | PGSC0003DMG40004<br>2754 | PGSC0003DMT4000<br>93183 | chr12 | yes | NO  |                                                                                             |
| 2494 | Heterozygous<br>PS in RH, not<br>shared by DM | PGSC0003DMG40004<br>2781 | PGSC0003DMT4000<br>93210 |       |     |     |                                                                                             |
| 2495 | Heterozygous<br>PS in RH, not<br>shared by DM | PGSC0003DMG40004<br>2855 | PGSC0003DMT4000<br>93284 | chr09 | yes | NO  |                                                                                             |
| 2496 | Heterozygous<br>PS in RH, not<br>shared by DM | PGSC0003DMG40004<br>2870 | PGSC0003DMT4000<br>93299 | chr01 | NO  | NO  |                                                                                             |
| 2497 | Heterozygous<br>PS in RH, not<br>shared by DM | PGSC0003DMG40004<br>2882 | PGSC0003DMT4000<br>93311 | chr09 | yes | NO  |                                                                                             |
| 2498 | Heterozygous<br>PS in RH, not<br>shared by DM | PGSC0003DMG40004<br>2890 | PGSC0003DMT4000<br>93319 | chr08 | yes | NO  |                                                                                             |
| 2499 | Heterozygous<br>PS in RH, not<br>shared by DM | PGSC0003DMG40004<br>2897 | PGSC0003DMT4000<br>93326 | chr12 | NO  | NO  |                                                                                             |
| 2500 | Heterozygous<br>PS in RH, not<br>shared by DM | PGSC0003DMG40004<br>2921 | PGSC0003DMT4000<br>93350 | -     | yes | yes | GO:0005524; ATP binding; Molecular<br>Function GO:0006915; apoptosis;<br>Biological Process |
| 2501 | Heterozygous<br>PS in RH, not<br>shared by DM | PGSC0003DMG40004<br>2927 | PGSC0003DMT4000<br>93356 |       |     |     |                                                                                             |
| 2502 | Heterozygous<br>PS in RH, not<br>shared by DM | PGSC0003DMG40004<br>2943 | PGSC0003DMT4000<br>93372 | chr09 | yes | NO  |                                                                                             |

|      |                                               |                          |                          |       |     |     |                                                                                                                                                                                                                                       |
|------|-----------------------------------------------|--------------------------|--------------------------|-------|-----|-----|---------------------------------------------------------------------------------------------------------------------------------------------------------------------------------------------------------------------------------------|
| 2503 | Heterozygous<br>PS in RH, not<br>shared by DM | PGSC0003DMG40004<br>2955 | PGSC0003DMT4000<br>93384 |       |     |     |                                                                                                                                                                                                                                       |
| 2504 | Heterozygous<br>PS in RH, not<br>shared by DM | PGSC0003DMG40004<br>2985 | PGSC0003DMT4000<br>93414 | chr01 | yes | NO  | GO:0031072; heat shock protein binding;<br>Molecular Function                                                                                                                                                                         |
| 2505 | Heterozygous<br>PS in RH, not<br>shared by DM | PGSC0003DMG40004<br>2997 | PGSC0003DMT4000<br>93426 | chr04 | yes | yes | GO:0004672; protein kinase activity;<br>Molecular Function GO:0005515; protein<br>binding; Molecular Function<br>GO:0005524; ATP binding; Molecular<br>Function GO:0006468; protein amino acid<br>phosphorylation; Biological Process |
| 2506 | Heterozygous<br>PS in RH, not<br>shared by DM | PGSC0003DMG40004<br>3009 | PGSC0003DMT4000<br>93438 | chr10 | NO  | NO  |                                                                                                                                                                                                                                       |
| 2507 | Heterozygous<br>PS in RH, not<br>shared by DM | PGSC0003DMG40004<br>3013 | PGSC0003DMT4000<br>93442 | -     | NO  | NO  |                                                                                                                                                                                                                                       |
| 2508 | Heterozygous<br>PS in RH, not<br>shared by DM | PGSC0003DMG40004<br>3032 | PGSC0003DMT4000<br>93461 | -     | yes | NO  | GO:0005515; protein binding; Molecular<br>Function GO:0016070; RNA metabolic<br>process; Biological Process                                                                                                                           |
| 2509 | Heterozygous<br>PS in RH, not<br>shared by DM | PGSC0003DMG40004<br>3178 | PGSC0003DMT4000<br>93607 | chr03 | yes | NO  | GO:0004672; protein kinase activity;<br>Molecular Function GO:0005515; protein<br>binding; Molecular Function<br>GO:0005524; ATP binding; Molecular<br>Function GO:0006468; protein amino acid<br>phosphorylation; Biological Process |
| 2510 | Heterozygous<br>PS in RH, not<br>shared by DM | PGSC0003DMG40004<br>3182 | PGSC0003DMT4000<br>93611 | chr05 | yes | NO  |                                                                                                                                                                                                                                       |
| 2511 | Heterozygous<br>PS in RH, not<br>shared by DM | PGSC0003DMG40004<br>3204 | PGSC0003DMT4000<br>93633 | chr04 | yes | NO  |                                                                                                                                                                                                                                       |
| 2512 | Heterozygous<br>PS in RH, not<br>shared by DM | PGSC0003DMG40004<br>3226 | PGSC0003DMT4000<br>93655 | chr10 | yes | NO  | GO:0004713; protein tyrosine kinase<br>activity; Molecular Function<br>GO:0005524; ATP binding; Molecular<br>Function GO:0006468; protein amino acid<br>phosphorylation; Biological Process                                           |

|      |                                               |                          |                          |       |     |     |                                                                                                                    |
|------|-----------------------------------------------|--------------------------|--------------------------|-------|-----|-----|--------------------------------------------------------------------------------------------------------------------|
| 2513 | Heterozygous<br>PS in RH, not<br>shared by DM | PGSC0003DMG40004<br>3228 | PGSC0003DMT4000<br>93657 | chr07 | NO  | NO  |                                                                                                                    |
| 2514 | Heterozygous<br>PS in RH, not<br>shared by DM | PGSC0003DMG40004<br>3254 | PGSC0003DMT4000<br>93683 | chr11 | yes | NO  | GO:0045735; nutrient reservoir activity;<br>Molecular Function                                                     |
| 2515 | Heterozygous<br>PS in RH, not<br>shared by DM | PGSC0003DMG40004<br>3262 | PGSC0003DMT4000<br>93691 | chr04 | yes | NO  |                                                                                                                    |
| 2516 | Heterozygous<br>PS in RH, not<br>shared by DM | PGSC0003DMG40004<br>3346 | PGSC0003DMT4000<br>93775 | chr04 | yes | NO  |                                                                                                                    |
| 2517 | Heterozygous<br>PS in RH, not<br>shared by DM | PGSC0003DMG40004<br>3370 | PGSC0003DMT4000<br>93799 | -     | NO  | NO  |                                                                                                                    |
| 2518 | Heterozygous<br>PS in RH, not<br>shared by DM | PGSC0003DMG40004<br>3420 | PGSC0003DMT4000<br>93849 | chr03 | yes | yes |                                                                                                                    |
| 2519 | Heterozygous<br>PS in RH, not<br>shared by DM | PGSC0003DMG40004<br>3438 | PGSC0003DMT4000<br>93867 | chr03 | yes | NO  | GO:0016747; transferase activity,<br>transferring acyl groups other than amino-<br>acyl groups; Molecular Function |
| 2520 | Heterozygous<br>PS in RH, not<br>shared by DM | PGSC0003DMG40004<br>3456 | PGSC0003DMT4000<br>93885 | chr06 | NO  | NO  |                                                                                                                    |
| 2521 | Heterozygous<br>PS in RH, not<br>shared by DM | PGSC0003DMG40004<br>3461 | PGSC0003DMT4000<br>93890 | -     | NO  | NO  |                                                                                                                    |
| 2522 | Heterozygous<br>PS in RH, not<br>shared by DM | PGSC0003DMG40004<br>3521 | PGSC0003DMT4000<br>93950 | chr01 | yes | NO  |                                                                                                                    |
| 2523 | Heterozygous<br>PS in RH, not<br>shared by DM | PGSC0003DMG40004<br>3525 | PGSC0003DMT4000<br>93954 | chr12 | yes | NO  |                                                                                                                    |

|      |                                               |                          |                          |       |     |     |                                                                                                                                                                                                                                                    |
|------|-----------------------------------------------|--------------------------|--------------------------|-------|-----|-----|----------------------------------------------------------------------------------------------------------------------------------------------------------------------------------------------------------------------------------------------------|
| 2524 | Heterozygous<br>PS in RH, not<br>shared by DM | PGSC0003DMG40004<br>3542 | PGSC0003DMT4000<br>93971 | -     | yes | NO  | GO:0003735; structural constituent of<br>ribosome; Molecular Function<br>GO:0005622; intracellular; Cellular<br>Component GO:0005840; ribosome;<br>Cellular Component GO:0006412;<br>translation; Biological Process                               |
| 2525 | Heterozygous<br>PS in RH, not<br>shared by DM | PGSC0003DMG40004<br>3550 | PGSC0003DMT4000<br>93979 | chr02 | NO  | NO  | GO:0004888; transmembrane receptor<br>activity; Molecular Function<br>GO:0007165; signal transduction;<br>Biological Process GO:0031224; intrinsic<br>to membrane; Cellular Component<br>GO:0045087; innate immune response;<br>Biological Process |
| 2526 | Heterozygous<br>PS in RH, not<br>shared by DM | PGSC0003DMG40004<br>3553 | PGSC0003DMT4000<br>93982 | chr02 | NO  | NO  | GO:0030528; transcription regulator<br>activity; Molecular Function<br>GO:0045449; regulation of transcription;<br>Biological Process                                                                                                              |
| 2527 | Heterozygous<br>PS in RH, not<br>shared by DM | PGSC0003DMG40004<br>3564 | PGSC0003DMT4000<br>93993 | chr01 | yes | yes |                                                                                                                                                                                                                                                    |
| 2528 | Heterozygous<br>PS in RH, not<br>shared by DM | PGSC0003DMG40004<br>3566 | PGSC0003DMT4000<br>93995 | chr06 | yes | NO  | GO:0003824; catalytic activity; Molecular<br>Function GO:0044237; cellular metabolic<br>process; Biological Process GO:0050662;<br>coenzyme binding; Molecular Function                                                                            |
| 2529 | Heterozygous<br>PS in RH, not<br>shared by DM | PGSC0003DMG40004<br>3592 | PGSC0003DMT4000<br>94021 | chr01 | NO  | NO  |                                                                                                                                                                                                                                                    |
| 2530 | Heterozygous<br>PS in RH, not<br>shared by DM | PGSC0003DMG40004<br>3600 | PGSC0003DMT4000<br>94029 | chr12 | yes | NO  |                                                                                                                                                                                                                                                    |
| 2531 | Heterozygous<br>PS in RH, not<br>shared by DM | PGSC0003DMG40004<br>3603 | PGSC0003DMT4000<br>94032 | chr04 | yes | NO  | GO:0004672; protein kinase activity;<br>Molecular Function GO:0005515; protein<br>binding; Molecular Function<br>GO:0005524; ATP binding; Molecular<br>Function GO:0006468; protein amino acid<br>phosphorylation; Biological Process              |

|      |                                               |                          |                          |       |     |     |                                                                                                                 |
|------|-----------------------------------------------|--------------------------|--------------------------|-------|-----|-----|-----------------------------------------------------------------------------------------------------------------|
| 2532 | Heterozygous<br>PS in RH, not<br>shared by DM | PGSC0003DMG40004<br>3626 | PGSC0003DMT4000<br>94055 | chr12 | yes | yes |                                                                                                                 |
| 2533 | Heterozygous<br>PS in RH, not<br>shared by DM | PGSC0003DMG40004<br>3628 | PGSC0003DMT4000<br>94057 | chr02 | yes | yes |                                                                                                                 |
| 2534 | Heterozygous<br>PS in RH, not<br>shared by DM | PGSC0003DMG40004<br>3629 | PGSC0003DMT4000<br>94058 | chr06 | NO  | NO  |                                                                                                                 |
| 2535 | Heterozygous<br>PS in RH, not<br>shared by DM | PGSC0003DMG40004<br>3638 | PGSC0003DMT4000<br>94067 | chr06 | yes | NO  |                                                                                                                 |
| 2536 | Heterozygous<br>PS in RH, not<br>shared by DM | PGSC0003DMG40004<br>3680 | PGSC0003DMT4000<br>94109 | chr06 | yes | NO  |                                                                                                                 |
| 2537 | Heterozygous<br>PS in RH, not<br>shared by DM | PGSC0003DMG40004<br>3704 | PGSC0003DMT4000<br>94133 | chr06 | yes | NO  |                                                                                                                 |
| 2538 | Heterozygous<br>PS in RH, not<br>shared by DM | PGSC0003DMG40004<br>3705 | PGSC0003DMT4000<br>94134 | chr06 | NO  | NO  |                                                                                                                 |
| 2539 | Heterozygous<br>PS in RH, not<br>shared by DM | PGSC0003DMG40004<br>3714 | PGSC0003DMT4000<br>94143 | chr12 | NO  | NO  | GO:0009058; biosynthetic process;<br>Biological Process GO:0016740;<br>transferase activity; Molecular Function |
| 2540 | Heterozygous<br>PS in RH, not<br>shared by DM | PGSC0003DMG40004<br>3739 | PGSC0003DMT4000<br>94168 | chr07 | yes | NO  |                                                                                                                 |
| 2541 | Heterozygous<br>PS in RH, not<br>shared by DM | PGSC0003DMG40004<br>3748 | PGSC0003DMT4000<br>94177 | chr09 | yes | NO  |                                                                                                                 |
| 2542 | Heterozygous<br>PS in RH, not<br>shared by DM | PGSC0003DMG40004<br>3773 | PGSC0003DMT4000<br>94202 | chr04 | yes | yes |                                                                                                                 |
| 2543 | Heterozygous<br>PS in RH, not<br>shared by DM | PGSC0003DMG40004<br>3792 | PGSC0003DMT4000<br>94221 | chr04 | NO  | NO  |                                                                                                                 |

|      |                                         |                          |                          |       |     |     |                                                                                                                                                                                                                                                                              |
|------|-----------------------------------------|--------------------------|--------------------------|-------|-----|-----|------------------------------------------------------------------------------------------------------------------------------------------------------------------------------------------------------------------------------------------------------------------------------|
| 2544 | Heterozygous PS in RH, not shared by DM | PGSC0003DMG40004<br>3811 | PGSC0003DMT4000<br>94240 | chr08 | yes | NO  | GO:0008237; metallopeptidase activity; Molecular Function GO:0008270; zinc ion binding; Molecular Function                                                                                                                                                                   |
| 2545 | Heterozygous PS in RH, not shared by DM | PGSC0003DMG40004<br>3828 | PGSC0003DMT4000<br>94257 | chr04 | yes | NO  |                                                                                                                                                                                                                                                                              |
| 2546 | Heterozygous PS in RH, not shared by DM | PGSC0003DMG40004<br>3868 | PGSC0003DMT4000<br>94297 | chr02 | NO  | NO  | GO:0000148; 1,3-beta-glucan synthase complex; Cellular Component GO:0003843; 1,3-beta-glucan synthase activity; Molecular Function GO:0006075; 1,3-beta-glucan biosynthetic process; Biological Process GO:0016020; membrane; Cellular Component                             |
| 2547 | Heterozygous PS in RH, not shared by DM | PGSC0003DMG40004<br>3911 | PGSC0003DMT4000<br>94340 | chr08 | yes | yes | GO:0008152; metabolic process; Biological Process GO:0016616; oxidoreductase activity, acting on the CH-OH group of donors, NAD or NADP as acceptor; Molecular Function GO:0048037; cofactor binding; Molecular Function GO:0051287; NAD or NADH binding; Molecular Function |
| 2548 | Heterozygous PS in RH, not shared by DM | PGSC0003DMG40004<br>3912 | PGSC0003DMT4000<br>94341 | chr09 | NO  | NO  |                                                                                                                                                                                                                                                                              |
| 2549 | Heterozygous PS in RH, not shared by DM | PGSC0003DMG40004<br>3928 | PGSC0003DMT4000<br>94357 | chr08 | NO  | NO  |                                                                                                                                                                                                                                                                              |
| 2550 | Heterozygous PS in RH, not shared by DM | PGSC0003DMG40004<br>4005 | PGSC0003DMT4000<br>94434 | chr06 | yes | NO  |                                                                                                                                                                                                                                                                              |
| 2551 | Heterozygous PS in RH, not shared by DM | PGSC0003DMG40004<br>4045 | PGSC0003DMT4000<br>94474 | chr01 | yes | NO  |                                                                                                                                                                                                                                                                              |
| 2552 | Heterozygous PS in RH, not shared by DM | PGSC0003DMG40004<br>4049 | PGSC0003DMT4000<br>94478 | -     | NO  | NO  |                                                                                                                                                                                                                                                                              |

|      |                                               |                          |                          |       |     |    |                                                                                                                                                                                                                               |
|------|-----------------------------------------------|--------------------------|--------------------------|-------|-----|----|-------------------------------------------------------------------------------------------------------------------------------------------------------------------------------------------------------------------------------|
| 2553 | Heterozygous<br>PS in RH, not<br>shared by DM | PGSC0003DMG40004<br>4115 | PGSC0003DMT4000<br>94544 | chr01 | yes | NO | GO:0004672; protein kinase activity;<br>Molecular Function GO:0005524; ATP<br>binding; Molecular Function<br>GO:0006468; protein amino acid<br>phosphorylation; Biological Process                                            |
| 2554 | Heterozygous<br>PS in RH, not<br>shared by DM | PGSC0003DMG40004<br>4146 | PGSC0003DMT4000<br>94575 | -     | NO  | NO |                                                                                                                                                                                                                               |
| 2555 | Heterozygous<br>PS in RH, not<br>shared by DM | PGSC0003DMG40004<br>4159 | PGSC0003DMT4000<br>94588 | chr09 | NO  | NO | GO:0008168; methyltransferase activity;<br>Molecular Function                                                                                                                                                                 |
| 2556 | Heterozygous<br>PS in RH, not<br>shared by DM | PGSC0003DMG40004<br>4193 | PGSC0003DMT4000<br>94622 | chr10 | yes | NO |                                                                                                                                                                                                                               |
| 2557 | Heterozygous<br>PS in RH, not<br>shared by DM | PGSC0003DMG40004<br>4203 | PGSC0003DMT4000<br>94632 | chr04 | yes | NO | GO:0004497; monooxygenase activity;<br>Molecular Function GO:0005506; iron ion<br>binding; Molecular Function<br>GO:0009055; electron carrier activity;<br>Molecular Function GO:0020037; heme<br>binding; Molecular Function |
| 2558 | Heterozygous<br>PS in RH, not<br>shared by DM | PGSC0003DMG40004<br>4266 | PGSC0003DMT4000<br>94695 | chr10 | yes | NO | GO:0008152; metabolic process;<br>Biological Process GO:0008415;<br>acyltransferase activity; Molecular<br>Function                                                                                                           |
| 2559 | Heterozygous<br>PS in RH, not<br>shared by DM | PGSC0003DMG40004<br>4270 | PGSC0003DMT4000<br>94699 | chr04 | NO  | NO |                                                                                                                                                                                                                               |
| 2560 | Heterozygous<br>PS in RH, not<br>shared by DM | PGSC0003DMG40004<br>4288 | PGSC0003DMT4000<br>94717 | chr01 | NO  | NO |                                                                                                                                                                                                                               |
| 2561 | Heterozygous<br>PS in RH, not<br>shared by DM | PGSC0003DMG40004<br>4318 | PGSC0003DMT4000<br>94747 | chr03 | yes | NO | GO:0005515; protein binding; Molecular<br>Function GO:0005524; ATP binding;<br>Molecular Function GO:0019538; protein<br>metabolic process; Biological Process                                                                |
| 2562 | Heterozygous<br>PS in RH, not<br>shared by DM | PGSC0003DMG40004<br>4342 | PGSC0003DMT4000<br>94771 | chr02 | NO  | NO |                                                                                                                                                                                                                               |



|      |                                               |                          |                          |       |     |    |                                                                                                                                                                                    |
|------|-----------------------------------------------|--------------------------|--------------------------|-------|-----|----|------------------------------------------------------------------------------------------------------------------------------------------------------------------------------------|
| 2563 | Heterozygous<br>PS in RH, not<br>shared by DM | PGSC0003DMG40004<br>4375 | PGSC0003DMT4000<br>94804 | chr06 | yes | NO |                                                                                                                                                                                    |
| 2564 | Heterozygous<br>PS in RH, not<br>shared by DM | PGSC0003DMG40004<br>4383 | PGSC0003DMT4000<br>94812 | chr12 | yes | NO |                                                                                                                                                                                    |
| 2565 | Heterozygous<br>PS in RH, not<br>shared by DM | PGSC0003DMG40004<br>4458 | PGSC0003DMT4000<br>94887 | chr02 | yes | NO |                                                                                                                                                                                    |
| 2566 | Heterozygous<br>PS in RH, not<br>shared by DM | PGSC0003DMG40004<br>4484 | PGSC0003DMT4000<br>94913 | chr11 | yes | NO |                                                                                                                                                                                    |
| 2567 | Heterozygous<br>PS in RH, not<br>shared by DM | PGSC0003DMG40004<br>4485 | PGSC0003DMT4000<br>94914 | -     | NO  | NO |                                                                                                                                                                                    |
| 2568 | Heterozygous<br>PS in RH, not<br>shared by DM | PGSC0003DMG40004<br>4560 | PGSC0003DMT4000<br>94989 | chr09 | yes | NO | GO:0000287; magnesium ion binding;<br>Molecular Function GO:0008152;<br>metabolic process; Biological Process<br>GO:0016829; lyase activity; Molecular<br>Function                 |
| 2569 | Heterozygous<br>PS in RH, not<br>shared by DM | PGSC0003DMG40004<br>4584 | PGSC0003DMT4000<br>95013 | -     | yes | NO | GO:0015031; protein transport; Biological<br>Process                                                                                                                               |
| 2570 | Heterozygous<br>PS in RH, not<br>shared by DM | PGSC0003DMG40004<br>4650 | PGSC0003DMT4000<br>95079 | -     | NO  | NO | GO:0004806; triacylglycerol lipase<br>activity; Molecular Function<br>GO:0006629; lipid metabolic process;<br>Biological Process                                                   |
| 2571 | Heterozygous<br>PS in RH, not<br>shared by DM | PGSC0003DMG40004<br>4679 | PGSC0003DMT4000<br>95108 | chr09 | yes | NO | GO:0004672; protein kinase activity;<br>Molecular Function GO:0005524; ATP<br>binding; Molecular Function<br>GO:0006468; protein amino acid<br>phosphorylation; Biological Process |
| 2572 | Heterozygous<br>PS in RH, not<br>shared by DM | PGSC0003DMG40004<br>4688 | PGSC0003DMT4000<br>95117 | chr04 | yes | NO |                                                                                                                                                                                    |
| 2573 | Heterozygous<br>PS in RH, not<br>shared by DM | PGSC0003DMG40004<br>4692 | PGSC0003DMT4000<br>95121 | chr07 | yes | NO | GO:0003677; DNA binding; Molecular<br>Function GO:0015074; DNA integration;<br>Biological Process                                                                                  |

|      |                                               |                          |                          |       |     |     |                                                                                                                       |
|------|-----------------------------------------------|--------------------------|--------------------------|-------|-----|-----|-----------------------------------------------------------------------------------------------------------------------|
| 2574 | Heterozygous<br>PS in RH, not<br>shared by DM | PGSC0003DMG40004<br>4698 | PGSC0003DMT4000<br>95127 | chr03 | NO  | NO  |                                                                                                                       |
| 2575 | Heterozygous<br>PS in RH, not<br>shared by DM | PGSC0003DMG40004<br>4702 | PGSC0003DMT4000<br>95131 | chr08 | yes | yes |                                                                                                                       |
| 2576 | Heterozygous<br>PS in RH, not<br>shared by DM | PGSC0003DMG40004<br>4708 | PGSC0003DMT4000<br>95137 | chr10 | NO  | NO  | GO:0005525; GTP binding; Molecular<br>Function                                                                        |
| 2577 | Heterozygous<br>PS in RH, not<br>shared by DM | PGSC0003DMG40004<br>4715 | PGSC0003DMT4000<br>95144 | chr12 | yes | NO  | GO:0005515; protein binding; Molecular<br>Function                                                                    |
| 2578 | Heterozygous<br>PS in RH, not<br>shared by DM | PGSC0003DMG40004<br>4732 | PGSC0003DMT4000<br>95161 | chr03 | yes | NO  | GO:0008152; metabolic process;<br>Biological Process GO:0008168;<br>methyltransferase activity; Molecular<br>Function |
| 2579 | Heterozygous<br>PS in RH, not<br>shared by DM | PGSC0003DMG40004<br>4791 | PGSC0003DMT4000<br>95220 | chr02 | NO  | NO  |                                                                                                                       |
| 2580 | Heterozygous<br>PS in RH, not<br>shared by DM | PGSC0003DMG40004<br>4804 | PGSC0003DMT4000<br>95233 | chr09 | NO  | NO  |                                                                                                                       |
| 2581 | Heterozygous<br>PS in RH, not<br>shared by DM | PGSC0003DMG40004<br>4834 | PGSC0003DMT4000<br>95263 | chr04 | NO  | NO  |                                                                                                                       |
| 2582 | Heterozygous<br>PS in RH, not<br>shared by DM | PGSC0003DMG40004<br>4835 | PGSC0003DMT4000<br>95264 | chr10 | NO  | NO  |                                                                                                                       |
| 2583 | Heterozygous<br>PS in RH, not<br>shared by DM | PGSC0003DMG40004<br>4843 | PGSC0003DMT4000<br>95272 | chr07 | yes | yes |                                                                                                                       |
| 2584 | Heterozygous<br>PS in RH, not<br>shared by DM | PGSC0003DMG40004<br>4853 | PGSC0003DMT4000<br>95282 | -     | NO  | NO  |                                                                                                                       |
| 2585 | Heterozygous<br>PS in RH, not<br>shared by DM | PGSC0003DMG40004<br>4862 | PGSC0003DMT4000<br>95291 | -     | yes | NO  |                                                                                                                       |

|      |                                               |                          |                          |       |     |     |                                                                                                                                                                                                                                                                  |
|------|-----------------------------------------------|--------------------------|--------------------------|-------|-----|-----|------------------------------------------------------------------------------------------------------------------------------------------------------------------------------------------------------------------------------------------------------------------|
| 2586 | Heterozygous<br>PS in RH, not<br>shared by DM | PGSC0003DMG40004<br>4885 | PGSC0003DMT4000<br>95314 | chr09 | NO  | NO  | GO:0003700; transcription factor activity;<br>Molecular Function GO:0005634;<br>nucleus; Cellular Component<br>GO:0006355; regulation of transcription,<br>DNA-dependent; Biological Process<br>GO:0043565; sequence-specific DNA<br>binding; Molecular Function |
| 2587 | Heterozygous<br>PS in RH, not<br>shared by DM | PGSC0003DMG40004<br>4933 | PGSC0003DMT4000<br>95362 | chr04 | yes | NO  |                                                                                                                                                                                                                                                                  |
| 2588 | Heterozygous<br>PS in RH, not<br>shared by DM | PGSC0003DMG40004<br>4939 | PGSC0003DMT4000<br>95368 | chr07 | yes | yes | GO:0004672; protein kinase activity;<br>Molecular Function GO:0005524; ATP<br>binding; Molecular Function<br>GO:0006468; protein amino acid<br>phosphorylation; Biological Process                                                                               |
| 2589 | Heterozygous<br>PS in RH, not<br>shared by DM | PGSC0003DMG40004<br>4954 | PGSC0003DMT4000<br>95383 | chr06 | NO  | NO  |                                                                                                                                                                                                                                                                  |
| 2590 | Heterozygous<br>PS in RH, not<br>shared by DM | PGSC0003DMG40004<br>4965 | PGSC0003DMT4000<br>95394 | chr10 | yes | NO  |                                                                                                                                                                                                                                                                  |
| 2591 | Heterozygous<br>PS in RH, not<br>shared by DM | PGSC0003DMG40004<br>5035 | PGSC0003DMT4000<br>95464 | chr01 | yes | NO  |                                                                                                                                                                                                                                                                  |
| 2592 | Heterozygous<br>PS in RH, not<br>shared by DM | PGSC0003DMG40004<br>5053 | PGSC0003DMT4000<br>95482 | chr10 | yes | yes |                                                                                                                                                                                                                                                                  |
| 2593 | Heterozygous<br>PS in RH, not<br>shared by DM | PGSC0003DMG40004<br>5071 | PGSC0003DMT4000<br>95500 | -     | NO  | NO  |                                                                                                                                                                                                                                                                  |
| 2594 | Heterozygous<br>PS in RH, not<br>shared by DM | PGSC0003DMG40004<br>5082 | PGSC0003DMT4000<br>95511 | chr04 | yes | yes | GO:0003723; RNA binding; Molecular<br>Function GO:0003964; RNA-directed<br>DNA polymerase activity; Molecular<br>Function GO:0006278; RNA-dependent<br>DNA replication; Biological Process                                                                       |

|      |                                               |                          |                          |       |     |     |                                                                                                                                                              |
|------|-----------------------------------------------|--------------------------|--------------------------|-------|-----|-----|--------------------------------------------------------------------------------------------------------------------------------------------------------------|
| 2595 | Heterozygous<br>PS in RH, not<br>shared by DM | PGSC0003DMG40004<br>5095 | PGSC0003DMT4000<br>95524 | chr04 | yes | yes |                                                                                                                                                              |
| 2596 | Heterozygous<br>PS in RH, not<br>shared by DM | PGSC0003DMG40004<br>5125 | PGSC0003DMT4000<br>95554 | chr02 | NO  | NO  |                                                                                                                                                              |
| 2597 | Heterozygous<br>PS in RH, not<br>shared by DM | PGSC0003DMG40004<br>5131 | PGSC0003DMT4000<br>95560 | -     | NO  | NO  |                                                                                                                                                              |
| 2598 | Heterozygous<br>PS in RH, not<br>shared by DM | PGSC0003DMG40004<br>5164 | PGSC0003DMT4000<br>95593 | chr07 | yes | yes | GO:0004751; ribose-5-phosphate<br>isomerase activity; Molecular Function<br>GO:0009052; pentose-phosphate shunt,<br>non-oxidative branch; Biological Process |
| 2599 | Heterozygous<br>PS in RH, not<br>shared by DM | PGSC0003DMG40004<br>5176 | PGSC0003DMT4000<br>95605 |       |     |     |                                                                                                                                                              |
| 2600 | Heterozygous<br>PS in RH, not<br>shared by DM | PGSC0003DMG40004<br>5252 | PGSC0003DMT4000<br>95681 | chr01 | NO  | NO  |                                                                                                                                                              |
| 2601 | Heterozygous<br>PS in RH, not<br>shared by DM | PGSC0003DMG40004<br>5258 | PGSC0003DMT4000<br>95687 | chr01 | yes | NO  |                                                                                                                                                              |
| 2602 | Heterozygous<br>PS in RH, not<br>shared by DM | PGSC0003DMG40004<br>5260 | PGSC0003DMT4000<br>95689 | chr02 | yes | NO  |                                                                                                                                                              |
| 2603 | Heterozygous<br>PS in RH, not<br>shared by DM | PGSC0003DMG40004<br>5271 | PGSC0003DMT4000<br>95700 | chr11 | yes | NO  | GO:0016311; dephosphorylation;<br>Biological Process GO:0016791;<br>phosphatase activity; Molecular Function                                                 |
| 2604 | Heterozygous<br>PS in RH, not<br>shared by DM | PGSC0003DMG40004<br>5288 | PGSC0003DMT4000<br>95717 | chr07 | yes | NO  |                                                                                                                                                              |
| 2605 | Heterozygous<br>PS in RH, not<br>shared by DM | PGSC0003DMG40004<br>5330 | PGSC0003DMT4000<br>95759 | chr12 | NO  | NO  |                                                                                                                                                              |

|      |                                               |                          |                          |       |     |    |                                                                                                                                                                                                                                                                                                                                           |
|------|-----------------------------------------------|--------------------------|--------------------------|-------|-----|----|-------------------------------------------------------------------------------------------------------------------------------------------------------------------------------------------------------------------------------------------------------------------------------------------------------------------------------------------|
| 2606 | Heterozygous<br>PS in RH, not<br>shared by DM | PGSC0003DMG40004<br>5335 | PGSC0003DMT4000<br>95764 | chr10 | yes | NO | GO:0004332; fructose-bisphosphate<br>aldolase activity; Molecular Function<br>GO:0005515; protein binding; Molecular<br>Function GO:0005524; ATP binding;<br>Molecular Function GO:0006096;<br>glycolysis; Biological Process<br>GO:0006915; apoptosis; Biological<br>Process                                                             |
| 2607 | Heterozygous<br>PS in RH, not<br>shared by DM | PGSC0003DMG40004<br>5356 | PGSC0003DMT4000<br>95785 | chr05 | NO  | NO |                                                                                                                                                                                                                                                                                                                                           |
| 2608 | Heterozygous<br>PS in RH, not<br>shared by DM | PGSC0003DMG40004<br>5398 | PGSC0003DMT4000<br>95827 | chr08 | NO  | NO | GO:0004190; aspartic-type endopeptidase<br>activity; Molecular Function<br>GO:0006508; proteolysis; Biological<br>Process                                                                                                                                                                                                                 |
| 2609 | Heterozygous<br>PS in RH, not<br>shared by DM | PGSC0003DMG40004<br>5416 | PGSC0003DMT4000<br>95845 |       |     |    |                                                                                                                                                                                                                                                                                                                                           |
| 2610 | Heterozygous<br>PS in RH, not<br>shared by DM | PGSC0003DMG40004<br>5427 | PGSC0003DMT4000<br>95856 | chr10 | NO  | NO |                                                                                                                                                                                                                                                                                                                                           |
| 2611 | Heterozygous<br>PS in RH, not<br>shared by DM | PGSC0003DMG40004<br>5434 | PGSC0003DMT4000<br>95863 | chr04 | yes | NO |                                                                                                                                                                                                                                                                                                                                           |
| 2612 | Heterozygous<br>PS in RH, not<br>shared by DM | PGSC0003DMG40004<br>5449 | PGSC0003DMT4000<br>95878 | -     | NO  | NO |                                                                                                                                                                                                                                                                                                                                           |
| 2613 | Heterozygous<br>PS in RH, not<br>shared by DM | PGSC0003DMG40004<br>5453 | PGSC0003DMT4000<br>95882 | chr04 | NO  | NO | GO:0003735; structural constituent of<br>ribosome; Molecular Function<br>GO:0005622; intracellular; Cellular<br>Component GO:0005840; ribosome;<br>Cellular Component GO:0006412;<br>translation; Biological Process<br>GO:0016491; oxidoreductase activity;<br>Molecular Function GO:0055114;<br>oxidation reduction; Biological Process |

|      |                                               |                          |                          |       |     |     |                                                                                                                                                                           |
|------|-----------------------------------------------|--------------------------|--------------------------|-------|-----|-----|---------------------------------------------------------------------------------------------------------------------------------------------------------------------------|
| 2614 | Heterozygous<br>PS in RH, not<br>shared by DM | PGSC0003DMG40004<br>5511 | PGSC0003DMT4000<br>95940 | chr12 | yes | yes | GO:0004553; hydrolase activity,<br>hydrolyzing O-glycosyl compounds;<br>Molecular Function GO:0005975;<br>carbohydrate metabolic process;<br>Biological Process           |
| 2615 | Heterozygous<br>PS in RH, not<br>shared by DM | PGSC0003DMG40004<br>5583 | PGSC0003DMT4000<br>96012 | chr03 | yes | NO  | GO:0008152; metabolic process;<br>Biological Process GO:0016758;<br>transferase activity, transferring hexosyl<br>groups; Molecular Function                              |
| 2616 | Heterozygous<br>PS in RH, not<br>shared by DM | PGSC0003DMG40004<br>5598 | PGSC0003DMT4000<br>96027 | -     | NO  | NO  |                                                                                                                                                                           |
| 2617 | Heterozygous<br>PS in RH, not<br>shared by DM | PGSC0003DMG40004<br>5690 | PGSC0003DMT4000<br>96119 | chr10 | yes | NO  |                                                                                                                                                                           |
| 2618 | Heterozygous<br>PS in RH, not<br>shared by DM | PGSC0003DMG40004<br>5706 | PGSC0003DMT4000<br>96135 | -     | yes | NO  |                                                                                                                                                                           |
| 2619 | Heterozygous<br>PS in RH, not<br>shared by DM | PGSC0003DMG40004<br>5726 | PGSC0003DMT4000<br>96155 | chr04 | NO  | NO  |                                                                                                                                                                           |
| 2620 | Heterozygous<br>PS in RH, not<br>shared by DM | PGSC0003DMG40004<br>5738 | PGSC0003DMT4000<br>96167 | chr09 | yes | NO  | GO:0008152; metabolic process;<br>Biological Process GO:0016491;<br>oxidoreductase activity; Molecular<br>Function GO:0055114; oxidation<br>reduction; Biological Process |
| 2621 | Heterozygous<br>PS in RH, not<br>shared by DM | PGSC0003DMG40004<br>5754 | PGSC0003DMT4000<br>96183 | chr07 | yes | NO  | GO:0005507; copper ion binding;<br>Molecular Function GO:0009055; electron<br>carrier activity; Molecular Function                                                        |
| 2622 | Heterozygous<br>PS in RH, not<br>shared by DM | PGSC0003DMG40004<br>5777 | PGSC0003DMT4000<br>96206 | chr10 | yes | NO  |                                                                                                                                                                           |
| 2623 | Heterozygous<br>PS in RH, not<br>shared by DM | PGSC0003DMG40004<br>5783 | PGSC0003DMT4000<br>96212 | chr01 | NO  | NO  |                                                                                                                                                                           |

|      |                                         |                          |                          |       |     |     |                                                                                                                                                         |
|------|-----------------------------------------|--------------------------|--------------------------|-------|-----|-----|---------------------------------------------------------------------------------------------------------------------------------------------------------|
| 2624 | Heterozygous PS in RH, not shared by DM | PGSC0003DMG40004<br>5803 | PGSC0003DMT4000<br>96232 | chr09 | NO  | NO  |                                                                                                                                                         |
| 2625 | Heterozygous PS in RH, not shared by DM | PGSC0003DMG40004<br>5804 | PGSC0003DMT4000<br>96233 | chr02 | yes | NO  | GO:0005506; iron ion binding; Molecular Function GO:0009055; electron carrier activity; Molecular Function GO:0020037; heme binding; Molecular Function |
| 2626 | Heterozygous PS in RH, not shared by DM | PGSC0003DMG40004<br>5810 | PGSC0003DMT4000<br>96239 | chr04 | yes | NO  |                                                                                                                                                         |
| 2627 | Heterozygous PS in RH, not shared by DM | PGSC0003DMG40004<br>5819 | PGSC0003DMT4000<br>96248 | chr03 | yes | NO  | GO:0005515; protein binding; Molecular Function                                                                                                         |
| 2628 | Heterozygous PS in RH, not shared by DM | PGSC0003DMG40004<br>5827 | PGSC0003DMT4000<br>96256 | chr12 | NO  | NO  |                                                                                                                                                         |
| 2629 | Heterozygous PS in RH, not shared by DM | PGSC0003DMG40004<br>5828 | PGSC0003DMT4000<br>96257 | chr08 | NO  | NO  |                                                                                                                                                         |
| 2630 | Heterozygous PS in RH, not shared by DM | PGSC0003DMG40004<br>5833 | PGSC0003DMT4000<br>96262 | chr02 | yes | yes | GO:0016429; tRNA (adenine-N1-)-methyltransferase activity; Molecular Function GO:0030488; tRNA methylation; Biological Process                          |
| 2631 | Heterozygous PS in RH, not shared by DM | PGSC0003DMG40004<br>5844 | PGSC0003DMT4000<br>96273 | chr01 | yes | NO  |                                                                                                                                                         |
| 2632 | Heterozygous PS in RH, not shared by DM | PGSC0003DMG40004<br>5918 | PGSC0003DMT4000<br>96347 | chr12 | NO  | NO  |                                                                                                                                                         |
| 2633 | Heterozygous PS in RH, not shared by DM | PGSC0003DMG40004<br>5943 | PGSC0003DMT4000<br>96372 | chr10 | yes | NO  |                                                                                                                                                         |
| 2634 | Heterozygous PS in RH, not shared by DM | PGSC0003DMG40004<br>5962 | PGSC0003DMT4000<br>96391 | chr09 | NO  | NO  | GO:0006284; base-excision repair; Biological Process                                                                                                    |

|      |                                               |                          |                          |       |     |     |                                                                                                                                                                                                                                                |
|------|-----------------------------------------------|--------------------------|--------------------------|-------|-----|-----|------------------------------------------------------------------------------------------------------------------------------------------------------------------------------------------------------------------------------------------------|
| 2635 | Heterozygous<br>PS in RH, not<br>shared by DM | PGSC0003DMG40004<br>5968 | PGSC0003DMT4000<br>96397 | chr01 | yes | NO  |                                                                                                                                                                                                                                                |
| 2636 | Heterozygous<br>PS in RH, not<br>shared by DM | PGSC0003DMG40004<br>5982 | PGSC0003DMT4000<br>96411 | chr04 | yes | NO  | GO:0016020; membrane; Cellular<br>Component                                                                                                                                                                                                    |
| 2637 | Heterozygous<br>PS in RH, not<br>shared by DM | PGSC0003DMG40004<br>5989 | PGSC0003DMT4000<br>96418 | chr06 | yes | NO  | GO:0003700; transcription factor activity;<br>Molecular Function GO:0006355;<br>regulation of transcription, DNA-<br>dependent; Biological Process                                                                                             |
| 2638 | Heterozygous<br>PS in RH, not<br>shared by DM | PGSC0003DMG40004<br>5992 | PGSC0003DMT4000<br>96421 | -     | yes | yes |                                                                                                                                                                                                                                                |
| 2639 | Heterozygous<br>PS in RH, not<br>shared by DM | PGSC0003DMG40004<br>6009 | PGSC0003DMT4000<br>96438 | chr07 | yes | NO  |                                                                                                                                                                                                                                                |
| 2640 | Heterozygous<br>PS in RH, not<br>shared by DM | PGSC0003DMG40004<br>6033 | PGSC0003DMT4000<br>96462 | -     | yes | NO  |                                                                                                                                                                                                                                                |
| 2641 | Heterozygous<br>PS in RH, not<br>shared by DM | PGSC0003DMG40004<br>6064 | PGSC0003DMT4000<br>96493 | chr06 | NO  | NO  |                                                                                                                                                                                                                                                |
| 2642 | Heterozygous<br>PS in RH, not<br>shared by DM | PGSC0003DMG40004<br>6084 | PGSC0003DMT4000<br>96513 | -     | NO  | NO  |                                                                                                                                                                                                                                                |
| 2643 | Heterozygous<br>PS in RH, not<br>shared by DM | PGSC0003DMG40004<br>6102 | PGSC0003DMT4000<br>96531 | chr04 | NO  | NO  |                                                                                                                                                                                                                                                |
| 2644 | Heterozygous<br>PS in RH, not<br>shared by DM | PGSC0003DMG40004<br>6162 | PGSC0003DMT4000<br>96591 | chr02 | yes | NO  |                                                                                                                                                                                                                                                |
| 2645 | Heterozygous<br>PS in RH, not<br>shared by DM | PGSC0003DMG40004<br>6178 | PGSC0003DMT4000<br>96607 | chr03 | NO  | NO  | GO:0005634; nucleus; Cellular<br>Component GO:0008270; zinc ion<br>binding; Molecular Function<br>GO:0016568; chromatin modification;<br>Biological Process GO:0018024; histone-<br>lysine N-methyltransferase activity;<br>Molecular Function |



|      |                                               |                          |                          |       |     |     |                                                                                                                                                                                                                                                                                                                                       |
|------|-----------------------------------------------|--------------------------|--------------------------|-------|-----|-----|---------------------------------------------------------------------------------------------------------------------------------------------------------------------------------------------------------------------------------------------------------------------------------------------------------------------------------------|
| 2646 | Heterozygous<br>PS in RH, not<br>shared by DM | PGSC0003DMG40004<br>6180 | PGSC0003DMT4000<br>96609 | chr05 | yes | NO  |                                                                                                                                                                                                                                                                                                                                       |
| 2647 | Heterozygous<br>PS in RH, not<br>shared by DM | PGSC0003DMG40004<br>6201 | PGSC0003DMT4000<br>96630 | chr03 | yes | NO  |                                                                                                                                                                                                                                                                                                                                       |
| 2648 | Heterozygous<br>PS in RH, not<br>shared by DM | PGSC0003DMG40004<br>6243 | PGSC0003DMT4000<br>96672 | chr08 | yes | NO  |                                                                                                                                                                                                                                                                                                                                       |
| 2649 | Heterozygous<br>PS in RH, not<br>shared by DM | PGSC0003DMG40004<br>6265 | PGSC0003DMT4000<br>96694 | chr10 | yes | yes | GO:0000103; sulfate assimilation;<br>Biological Process GO:0005524; ATP<br>binding; Molecular Function<br>GO:0016301; kinase activity; Molecular<br>Function GO:0016772; transferase<br>activity, transferring phosphorus-<br>containing groups; Molecular Function<br>GO:0045735; nutrient reservoir activity;<br>Molecular Function |
| 2650 | Heterozygous<br>PS in RH, not<br>shared by DM | PGSC0003DMG40004<br>6266 | PGSC0003DMT4000<br>96695 | chr01 | NO  | NO  |                                                                                                                                                                                                                                                                                                                                       |
| 2651 | Heterozygous<br>PS in RH, not<br>shared by DM | PGSC0003DMG40004<br>6297 | PGSC0003DMT4000<br>96726 | chr07 | yes | NO  | GO:0019787; small conjugating protein<br>ligase activity; Molecular Function<br>GO:0043687; post-translational protein<br>modification; Biological Process<br>GO:0051246; regulation of protein<br>metabolic process; Biological Process                                                                                              |
| 2652 | Heterozygous<br>PS in RH, not<br>shared by DM | PGSC0003DMG40004<br>6305 | PGSC0003DMT4000<br>96734 | chr11 | NO  | NO  |                                                                                                                                                                                                                                                                                                                                       |
| 2653 | Heterozygous<br>PS in RH, not<br>shared by DM | PGSC0003DMG40004<br>6306 | PGSC0003DMT4000<br>96735 | chr02 | NO  | NO  | GO:0003676; nucleic acid binding;<br>Molecular Function GO:0005524; ATP<br>binding; Molecular Function<br>GO:0008026; ATP-dependent helicase<br>activity; Molecular Function                                                                                                                                                          |
| 2654 | Heterozygous<br>PS in RH, not<br>shared by DM | PGSC0003DMG40004<br>6312 | PGSC0003DMT4000<br>96741 | chr10 | yes | NO  | GO:0003676; nucleic acid binding;<br>Molecular Function                                                                                                                                                                                                                                                                               |

|      |                                               |                          |                          |       |     |     |                                                                                                                                                                                                                                                                                                                                                                                                     |
|------|-----------------------------------------------|--------------------------|--------------------------|-------|-----|-----|-----------------------------------------------------------------------------------------------------------------------------------------------------------------------------------------------------------------------------------------------------------------------------------------------------------------------------------------------------------------------------------------------------|
| 2655 | Heterozygous<br>PS in RH, not<br>shared by DM | PGSC0003DMG40004<br>6357 | PGSC0003DMT4000<br>96786 | -     | NO  | NO  |                                                                                                                                                                                                                                                                                                                                                                                                     |
| 2656 | Heterozygous<br>PS in RH, not<br>shared by DM | PGSC0003DMG40004<br>6375 | PGSC0003DMT4000<br>96804 | chr08 | NO  | NO  | GO:0004190; aspartic-type endopeptidase<br>activity; Molecular Function<br>GO:0006508; proteolysis; Biological<br>Process                                                                                                                                                                                                                                                                           |
| 2657 | Heterozygous<br>PS in RH, not<br>shared by DM | PGSC0003DMG40004<br>6382 | PGSC0003DMT4000<br>96811 | chr07 | NO  | NO  |                                                                                                                                                                                                                                                                                                                                                                                                     |
| 2658 | Heterozygous<br>PS in RH, not<br>shared by DM | PGSC0003DMG40004<br>6415 | PGSC0003DMT4000<br>96844 | chr09 | yes | NO  |                                                                                                                                                                                                                                                                                                                                                                                                     |
| 2659 | Heterozygous<br>PS in RH, not<br>shared by DM | PGSC0003DMG40004<br>6419 | PGSC0003DMT4000<br>96848 | chr09 | yes | NO  | GO:0004497; monooxygenase activity;<br>Molecular Function GO:0005506; iron ion<br>binding; Molecular Function<br>GO:0009055; electron carrier activity;<br>Molecular Function GO:0020037; heme<br>binding; Molecular Function<br>GO:0000287; magnesium ion binding;<br>Molecular Function GO:0008152;<br>metabolic process; Biological Process<br>GO:0016829; lyase activity; Molecular<br>Function |
| 2660 | Heterozygous<br>PS in RH, not<br>shared by DM | PGSC0003DMG40004<br>6427 | PGSC0003DMT4000<br>96856 | chr12 | NO  | NO  |                                                                                                                                                                                                                                                                                                                                                                                                     |
| 2661 | Heterozygous<br>PS in RH, not<br>shared by DM | PGSC0003DMG40004<br>6437 | PGSC0003DMT4000<br>96866 | chr01 | yes | NO  |                                                                                                                                                                                                                                                                                                                                                                                                     |
| 2662 | Heterozygous<br>PS in RH, not<br>shared by DM | PGSC0003DMG40004<br>6445 | PGSC0003DMT4000<br>96874 | chr06 | yes | yes |                                                                                                                                                                                                                                                                                                                                                                                                     |
| 2663 | Heterozygous<br>PS in RH, not<br>shared by DM | PGSC0003DMG40004<br>6512 | PGSC0003DMT4000<br>96941 | chr11 | yes | NO  |                                                                                                                                                                                                                                                                                                                                                                                                     |
| 2664 | Heterozygous<br>PS in RH, not<br>shared by DM | PGSC0003DMG40004<br>6549 | PGSC0003DMT4000<br>96978 | chr05 | yes | yes |                                                                                                                                                                                                                                                                                                                                                                                                     |

|      |                                               |                          |                          |       |     |     |                                                                                                                                                                                                                                                                                                       |
|------|-----------------------------------------------|--------------------------|--------------------------|-------|-----|-----|-------------------------------------------------------------------------------------------------------------------------------------------------------------------------------------------------------------------------------------------------------------------------------------------------------|
| 2665 | Heterozygous<br>PS in RH, not<br>shared by DM | PGSC0003DMG40004<br>6578 | PGSC0003DMT4000<br>97007 | chr07 | yes | NO  |                                                                                                                                                                                                                                                                                                       |
| 2666 | Heterozygous<br>PS in RH, not<br>shared by DM | PGSC0003DMG40004<br>6594 | PGSC0003DMT4000<br>97023 | chr02 | yes | yes |                                                                                                                                                                                                                                                                                                       |
| 2667 | Heterozygous<br>PS in RH, not<br>shared by DM | PGSC0003DMG40004<br>6621 | PGSC0003DMT4000<br>97050 | chr12 | NO  | NO  | GO:0016491; oxidoreductase activity;<br>Molecular Function                                                                                                                                                                                                                                            |
| 2668 | Heterozygous<br>PS in RH, not<br>shared by DM | PGSC0003DMG40004<br>6647 | PGSC0003DMT4000<br>97076 | chr12 | yes | yes |                                                                                                                                                                                                                                                                                                       |
| 2669 | Heterozygous<br>PS in RH, not<br>shared by DM | PGSC0003DMG40004<br>6659 | PGSC0003DMT4000<br>97088 | chr06 | NO  | NO  |                                                                                                                                                                                                                                                                                                       |
| 2670 | Heterozygous<br>PS in RH, not<br>shared by DM | PGSC0003DMG40004<br>6722 | PGSC0003DMT4000<br>97151 | chr11 | yes | NO  | GO:0004888; transmembrane receptor<br>activity; Molecular Function<br>GO:0005515; protein binding; Molecular<br>Function GO:0007165; signal<br>transduction; Biological Process<br>GO:0031224; intrinsic to membrane;<br>Cellular Component GO:0045087; innate<br>immune response; Biological Process |
| 2671 | Heterozygous<br>PS in RH, not<br>shared by DM | PGSC0003DMG40004<br>6727 | PGSC0003DMT4000<br>97156 | chr03 | NO  | NO  |                                                                                                                                                                                                                                                                                                       |
| 2672 | Heterozygous<br>PS in RH, not<br>shared by DM | PGSC0003DMG40004<br>6744 | PGSC0003DMT4000<br>97173 | -     | NO  | NO  |                                                                                                                                                                                                                                                                                                       |
| 2673 | Heterozygous<br>PS in RH, not<br>shared by DM | PGSC0003DMG40004<br>6780 | PGSC0003DMT4000<br>97209 | chr03 | yes | NO  | GO:0003735; structural constituent of<br>ribosome; Molecular Function<br>GO:0005622; intracellular; Cellular<br>Component GO:0005840; ribosome;<br>Cellular Component GO:0006412;<br>translation; Biological Process                                                                                  |
| 2674 | Heterozygous<br>PS in RH, not<br>shared by DM | PGSC0003DMG40004<br>6789 | PGSC0003DMT4000<br>97218 | chr12 | yes | yes | GO:0005524; ATP binding; Molecular<br>Function GO:0006915; apoptosis;<br>Biological Process                                                                                                                                                                                                           |

|      |                                               |                          |                          |       |     |     |                                                                                                                                                                                                                                                                                       |
|------|-----------------------------------------------|--------------------------|--------------------------|-------|-----|-----|---------------------------------------------------------------------------------------------------------------------------------------------------------------------------------------------------------------------------------------------------------------------------------------|
| 2675 | Heterozygous<br>PS in RH, not<br>shared by DM | PGSC0003DMG40004<br>6796 | PGSC0003DMT4000<br>97225 | chr04 | yes | NO  | GO:0004867; serine-type endopeptidase<br>inhibitor activity; Molecular Function                                                                                                                                                                                                       |
| 2676 | Heterozygous<br>PS in RH, not<br>shared by DM | PGSC0003DMG40004<br>6800 | PGSC0003DMT4000<br>97229 | chr11 | NO  | NO  |                                                                                                                                                                                                                                                                                       |
| 2677 | Heterozygous<br>PS in RH, not<br>shared by DM | PGSC0003DMG40004<br>6845 | PGSC0003DMT4000<br>97274 | chr12 | yes | yes |                                                                                                                                                                                                                                                                                       |
| 2678 | Heterozygous<br>PS in RH, not<br>shared by DM | PGSC0003DMG40004<br>6847 | PGSC0003DMT4000<br>97276 | chr05 | yes | yes |                                                                                                                                                                                                                                                                                       |
| 2679 | Heterozygous<br>PS in RH, not<br>shared by DM | PGSC0003DMG40004<br>6848 | PGSC0003DMT4000<br>97277 | chr10 | NO  | NO  | GO:0016702; oxidoreductase activity,<br>acting on single donors with incorporation<br>of molecular oxygen, incorporation of two<br>atoms of oxygen; Molecular Function<br>GO:0046872; metal ion binding;<br>Molecular Function GO:0055114;<br>oxidation reduction; Biological Process |
| 2680 | Heterozygous<br>PS in RH, not<br>shared by DM | PGSC0003DMG40004<br>6882 | PGSC0003DMT4000<br>97311 | chr03 | yes | NO  | GO:0003700; transcription factor activity;<br>Molecular Function GO:0043565;<br>sequence-specific DNA binding;<br>Molecular Function GO:0045449;<br>regulation of transcription; Biological<br>Process                                                                                |
| 2681 | Heterozygous<br>PS in RH, not<br>shared by DM | PGSC0003DMG40004<br>6903 | PGSC0003DMT4000<br>97332 | chr01 | yes | yes |                                                                                                                                                                                                                                                                                       |
| 2682 | Heterozygous<br>PS in RH, not<br>shared by DM | PGSC0003DMG40004<br>6916 | PGSC0003DMT4000<br>97345 | chr01 | yes | yes |                                                                                                                                                                                                                                                                                       |
| 2683 | Heterozygous<br>PS in RH, not<br>shared by DM | PGSC0003DMG40004<br>6938 | PGSC0003DMT4000<br>97367 | chr04 | yes | yes | GO:0016787; hydrolase activity;<br>Molecular Function                                                                                                                                                                                                                                 |

|      |                                               |                          |                          |       |     |     |                                                                                                                                                                                                                                                                                                                                                                                                                                                                                                                                                                                                                                           |
|------|-----------------------------------------------|--------------------------|--------------------------|-------|-----|-----|-------------------------------------------------------------------------------------------------------------------------------------------------------------------------------------------------------------------------------------------------------------------------------------------------------------------------------------------------------------------------------------------------------------------------------------------------------------------------------------------------------------------------------------------------------------------------------------------------------------------------------------------|
| 2684 | Heterozygous<br>PS in RH, not<br>shared by DM | PGSC0003DMG40004<br>6977 | PGSC0003DMT4000<br>97406 | chr02 | yes | NO  | GO:0000155; two-component sensor<br>activity; Molecular Function<br>GO:0004872; receptor activity; Molecular<br>Function GO:0005524; ATP binding;<br>Molecular Function GO:0006355;<br>regulation of transcription, DNA-<br>dependent; Biological Process<br>GO:0007165; signal transduction;<br>Biological Process GO:0007600; sensory<br>perception; Biological Process<br>GO:0008020; G-protein coupled<br>photoreceptor activity; Molecular<br>Function GO:0016020; membrane;<br>Cellular Component GO:0018298; protein-<br>chromophore linkage; Biological Process<br>GO:0045449; regulation of transcription;<br>Biological Process |
| 2685 | Heterozygous<br>PS in RH, not<br>shared by DM | PGSC0003DMG40004<br>6995 | PGSC0003DMT4000<br>97424 | chr04 | yes | NO  | GO:0008152; metabolic process;<br>Biological Process GO:0016758;<br>transferase activity, transferring hexosyl<br>groups; Molecular Function                                                                                                                                                                                                                                                                                                                                                                                                                                                                                              |
| 2686 | Heterozygous<br>PS in RH, not<br>shared by DM | PGSC0003DMG40004<br>7004 | PGSC0003DMT4000<br>97433 | chr05 | yes | NO  |                                                                                                                                                                                                                                                                                                                                                                                                                                                                                                                                                                                                                                           |
| 2687 | Heterozygous<br>PS in RH, not<br>shared by DM | PGSC0003DMG40004<br>7005 | PGSC0003DMT4000<br>97434 | chr06 | NO  | NO  |                                                                                                                                                                                                                                                                                                                                                                                                                                                                                                                                                                                                                                           |
| 2688 | Heterozygous<br>PS in RH, not<br>shared by DM | PGSC0003DMG40004<br>7037 | PGSC0003DMT4000<br>97466 | chr03 | yes | NO  |                                                                                                                                                                                                                                                                                                                                                                                                                                                                                                                                                                                                                                           |
| 2689 | Heterozygous<br>PS in RH, not<br>shared by DM | PGSC0003DMG40004<br>7075 | PGSC0003DMT4000<br>97504 | -     | yes | NO  |                                                                                                                                                                                                                                                                                                                                                                                                                                                                                                                                                                                                                                           |
| 2690 | Heterozygous<br>PS in RH, not<br>shared by DM | PGSC0003DMG40004<br>7078 | PGSC0003DMT4000<br>97507 | chr08 | yes | yes |                                                                                                                                                                                                                                                                                                                                                                                                                                                                                                                                                                                                                                           |

|      |                                               |                          |                          |       |     |     |                                                                                                                                                                                                        |
|------|-----------------------------------------------|--------------------------|--------------------------|-------|-----|-----|--------------------------------------------------------------------------------------------------------------------------------------------------------------------------------------------------------|
| 2691 | Heterozygous<br>PS in RH, not<br>shared by DM | PGSC0003DMG40004<br>7088 | PGSC0003DMT4000<br>97517 | chr04 | yes | NO  |                                                                                                                                                                                                        |
| 2692 | Heterozygous<br>PS in RH, not<br>shared by DM | PGSC0003DMG40004<br>7103 | PGSC0003DMT4000<br>97532 | chr03 | yes | NO  |                                                                                                                                                                                                        |
| 2693 | Heterozygous<br>PS in RH, not<br>shared by DM | PGSC0003DMG40004<br>7120 | PGSC0003DMT4000<br>97549 | chr04 | yes | NO  |                                                                                                                                                                                                        |
| 2694 | Heterozygous<br>PS in RH, not<br>shared by DM | PGSC0003DMG40004<br>7153 | PGSC0003DMT4000<br>97582 | -     | yes | yes |                                                                                                                                                                                                        |
| 2695 | Heterozygous<br>PS in RH, not<br>shared by DM | PGSC0003DMG40004<br>7170 | PGSC0003DMT4000<br>97599 | chr10 | yes | NO  |                                                                                                                                                                                                        |
| 2696 | Heterozygous<br>PS in RH, not<br>shared by DM | PGSC0003DMG40004<br>7244 | PGSC0003DMT4000<br>97673 | chr05 | yes | yes |                                                                                                                                                                                                        |
| 2697 | Heterozygous<br>PS in RH, not<br>shared by DM | PGSC0003DMG40004<br>7266 | PGSC0003DMT4000<br>97695 | chr12 | NO  | NO  | GO:0003700; transcription factor activity;<br>Molecular Function GO:0043565;<br>sequence-specific DNA binding;<br>Molecular Function GO:0045449;<br>regulation of transcription; Biological<br>Process |
| 2698 | Heterozygous<br>PS in RH, not<br>shared by DM | PGSC0003DMG40004<br>7275 | PGSC0003DMT4000<br>97704 | chr04 | NO  | NO  |                                                                                                                                                                                                        |
| 2699 | Heterozygous<br>PS in RH, not<br>shared by DM | PGSC0003DMG40004<br>7304 | PGSC0003DMT4000<br>97733 | chr10 | yes | NO  |                                                                                                                                                                                                        |
| 2700 | Heterozygous<br>PS in RH, not<br>shared by DM | PGSC0003DMG40004<br>7351 | PGSC0003DMT4000<br>97780 | chr05 | yes | NO  | GO:0003676; nucleic acid binding;<br>Molecular Function GO:0004523;<br>ribonuclease H activity; Molecular<br>Function                                                                                  |
| 2701 | Homozygous<br>PS in RH                        | PGSC0003DMG40100<br>0097 | PGSC0003DMT4000<br>00290 | chr05 | yes | NO  |                                                                                                                                                                                                        |

|      |                        |                          |                          |       |     |     |                                                                                                                                                                                                                      |
|------|------------------------|--------------------------|--------------------------|-------|-----|-----|----------------------------------------------------------------------------------------------------------------------------------------------------------------------------------------------------------------------|
| 2702 | Homozygous<br>PS in RH | PGSC0003DMG40000<br>0098 | PGSC0003DMT4000<br>00293 | chr05 | NO  | NO  | GO:0006629; lipid metabolic process;<br>Biological Process GO:0016788;<br>hydrolase activity, acting on ester bonds;<br>Molecular Function                                                                           |
| 2703 | Homozygous<br>PS in RH | PGSC0003DMG40000<br>0252 | PGSC0003DMT4000<br>00701 | chr12 | yes | NO  | GO:0003735; structural constituent of<br>ribosome; Molecular Function<br>GO:0005622; intracellular; Cellular<br>Component GO:0005840; ribosome;<br>Cellular Component GO:0006412;<br>translation; Biological Process |
| 2704 | Homozygous<br>PS in RH | PGSC0003DMG40000<br>0255 | PGSC0003DMT4000<br>00704 | chr04 | NO  | NO  |                                                                                                                                                                                                                      |
| 2705 | Homozygous<br>PS in RH | PGSC0003DMG40000<br>0358 | PGSC0003DMT4000<br>00956 | chr02 | yes | NO  | GO:0003700; transcription factor activity;<br>Molecular Function GO:0043565;<br>sequence-specific DNA binding;<br>Molecular Function GO:0045449;<br>regulation of transcription; Biological<br>Process               |
| 2706 | Homozygous<br>PS in RH | PGSC0003DMG40000<br>0483 | PGSC0003DMT4000<br>01270 | chr02 | yes | NO  | GO:0045735; nutrient reservoir activity;<br>Molecular Function                                                                                                                                                       |
| 2707 | Homozygous<br>PS in RH | PGSC0003DMG40000<br>0578 | PGSC0003DMT4000<br>01565 | chr07 | NO  | NO  |                                                                                                                                                                                                                      |
| 2708 | Homozygous<br>PS in RH | PGSC0003DMG40300<br>0585 | PGSC0003DMT4000<br>01582 | chr02 | NO  | NO  |                                                                                                                                                                                                                      |
| 2709 | Homozygous<br>PS in RH | PGSC0003DMG40000<br>0595 | PGSC0003DMT4000<br>01611 | chr06 | NO  | NO  |                                                                                                                                                                                                                      |
| 2710 | Homozygous<br>PS in RH | PGSC0003DMG40000<br>0599 | PGSC0003DMT4000<br>01617 | chr10 | yes | yes |                                                                                                                                                                                                                      |
| 2711 | Homozygous<br>PS in RH | PGSC0003DMG40000<br>0637 | PGSC0003DMT4000<br>01705 | chr07 | NO  | NO  | GO:0003677; DNA binding; Molecular<br>Function GO:0005634; nucleus; Cellular<br>Component                                                                                                                            |
| 2712 | Homozygous<br>PS in RH | PGSC0003DMG40000<br>0682 | PGSC0003DMT4000<br>01821 | chr08 | yes | yes | GO:0004421; hydroxymethylglutaryl-CoA<br>synthase activity; Molecular Function<br>GO:0008299; isoprenoid biosynthetic<br>process; Biological Process                                                                 |
| 2713 | Homozygous<br>PS in RH | PGSC0003DMG40000<br>0799 | PGSC0003DMT4000<br>02100 | chr04 | NO  | NO  |                                                                                                                                                                                                                      |

|      |                        |                          |                          |       |     |     |                                                                                                                                                                                                    |
|------|------------------------|--------------------------|--------------------------|-------|-----|-----|----------------------------------------------------------------------------------------------------------------------------------------------------------------------------------------------------|
| 2714 | Homozygous<br>PS in RH | PGSC0003DMG40000<br>0806 | PGSC0003DMT4000<br>02115 | chr05 | yes | NO  | GO:0003924; GTPase activity; Molecular<br>Function GO:0005525; GTP binding;<br>Molecular Function                                                                                                  |
| 2715 | Homozygous<br>PS in RH | PGSC0003DMG40000<br>0885 | PGSC0003DMT4000<br>02312 | chr12 | NO  | NO  |                                                                                                                                                                                                    |
| 2716 | Homozygous<br>PS in RH | PGSC0003DMG40200<br>0911 | PGSC0003DMT4000<br>02377 | chr11 | yes | NO  |                                                                                                                                                                                                    |
| 2717 | Homozygous<br>PS in RH | PGSC0003DMG40200<br>0914 | PGSC0003DMT4000<br>02382 | chr07 | NO  | NO  |                                                                                                                                                                                                    |
| 2718 | Homozygous<br>PS in RH | PGSC0003DMG40000<br>1155 | PGSC0003DMT4000<br>02955 | -     | NO  | NO  | GO:0008152; metabolic process;<br>Biological Process GO:0016758;<br>transferase activity, transferring hexosyl<br>groups; Molecular Function                                                       |
| 2719 | Homozygous<br>PS in RH | PGSC0003DMG40000<br>1242 | PGSC0003DMT4000<br>03131 | chr06 | NO  | NO  |                                                                                                                                                                                                    |
| 2720 | Homozygous<br>PS in RH | PGSC0003DMG40000<br>1597 | PGSC0003DMT4000<br>04045 | -     | yes | yes |                                                                                                                                                                                                    |
| 2721 | Homozygous<br>PS in RH | PGSC0003DMG40000<br>1637 | PGSC0003DMT4000<br>04139 | chr10 | yes | NO  | GO:0005515; protein binding; Molecular<br>Function GO:0005524; ATP binding;<br>Molecular Function GO:0006915;<br>apoptosis; Biological Process                                                     |
| 2722 | Homozygous<br>PS in RH | PGSC0003DMG40000<br>1867 | PGSC0003DMT4000<br>04722 | chr04 | NO  | NO  |                                                                                                                                                                                                    |
| 2723 | Homozygous<br>PS in RH | PGSC0003DMG40200<br>1968 | PGSC0003DMT4000<br>04975 | chr12 | NO  | NO  |                                                                                                                                                                                                    |
| 2724 | Homozygous<br>PS in RH | PGSC0003DMG40000<br>1970 | PGSC0003DMT4000<br>04986 | chr10 | yes | NO  | GO:0008168; methyltransferase activity;<br>Molecular Function GO:0008171; O-<br>methyltransferase activity; Molecular<br>Function GO:0046983; protein<br>dimerization activity; Molecular Function |
| 2725 | Homozygous<br>PS in RH | PGSC0003DMG40000<br>2203 | PGSC0003DMT4000<br>05615 | chr04 | yes | NO  | GO:0004672; protein kinase activity;<br>Molecular Function GO:0005524; ATP<br>binding; Molecular Function<br>GO:0006468; protein amino acid<br>phosphorylation; Biological Process                 |
| 2726 | Homozygous<br>PS in RH | PGSC0003DMG40000<br>2213 | PGSC0003DMT4000<br>05645 | chr07 | yes | NO  |                                                                                                                                                                                                    |



|      |                        |                          |                          |       |     |     |                                                                                                                                                                                                                                                                                                   |
|------|------------------------|--------------------------|--------------------------|-------|-----|-----|---------------------------------------------------------------------------------------------------------------------------------------------------------------------------------------------------------------------------------------------------------------------------------------------------|
| 2727 | Homozygous<br>PS in RH | PGSC0003DMG40000<br>2401 | PGSC0003DMT4000<br>06174 | -     | NO  | NO  |                                                                                                                                                                                                                                                                                                   |
| 2728 | Homozygous<br>PS in RH | PGSC0003DMG40100<br>2538 | PGSC0003DMT4000<br>06502 | chr11 | yes | NO  | GO:0004497; monooxygenase activity;<br>Molecular Function GO:0005506; iron ion<br>binding; Molecular Function<br>GO:0009055; electron carrier activity;<br>Molecular Function GO:0020037; heme<br>binding; Molecular Function                                                                     |
| 2729 | Homozygous<br>PS in RH | PGSC0003DMG40000<br>2541 | PGSC0003DMT4000<br>06512 | -     | yes | NO  |                                                                                                                                                                                                                                                                                                   |
| 2730 | Homozygous<br>PS in RH | PGSC0003DMG40000<br>2560 | PGSC0003DMT4000<br>06581 | chr02 | yes | yes |                                                                                                                                                                                                                                                                                                   |
| 2731 | Homozygous<br>PS in RH | PGSC0003DMG40000<br>2682 | PGSC0003DMT4000<br>06915 | chr10 | yes | NO  | GO:0004672; protein kinase activity;<br>Molecular Function GO:0005524; ATP<br>binding; Molecular Function<br>GO:0006468; protein amino acid<br>phosphorylation; Biological Process<br>GO:0003676; nucleic acid binding;<br>Molecular Function GO:0008270; zinc ion<br>binding; Molecular Function |
| 2732 | Homozygous<br>PS in RH | PGSC0003DMG40000<br>2740 | PGSC0003DMT4000<br>07079 | chr02 | yes | yes |                                                                                                                                                                                                                                                                                                   |
| 2733 | Homozygous<br>PS in RH | PGSC0003DMG40000<br>2924 | PGSC0003DMT4000<br>07575 | chr04 | yes | yes |                                                                                                                                                                                                                                                                                                   |
| 2734 | Homozygous<br>PS in RH | PGSC0003DMG40000<br>2984 | PGSC0003DMT4000<br>07723 | chr08 | NO  | NO  |                                                                                                                                                                                                                                                                                                   |
| 2735 | Homozygous<br>PS in RH | PGSC0003DMG40000<br>3097 | PGSC0003DMT4000<br>08016 | chr05 | NO  | NO  |                                                                                                                                                                                                                                                                                                   |
| 2736 | Homozygous<br>PS in RH | PGSC0003DMG40000<br>3119 | PGSC0003DMT4000<br>08091 | chr01 | yes | yes | GO:0003677; DNA binding; Molecular<br>Function GO:0005634; nucleus; Cellular<br>Component                                                                                                                                                                                                         |
| 2737 | Homozygous<br>PS in RH | PGSC0003DMG40000<br>3134 | PGSC0003DMT4000<br>08126 | chr08 | yes | NO  |                                                                                                                                                                                                                                                                                                   |
| 2738 | Homozygous<br>PS in RH | PGSC0003DMG40000<br>3158 | PGSC0003DMT4000<br>08191 | chr10 | NO  | NO  |                                                                                                                                                                                                                                                                                                   |
| 2739 | Homozygous<br>PS in RH | PGSC0003DMG40200<br>3185 | PGSC0003DMT4000<br>08258 | chr12 | NO  | NO  |                                                                                                                                                                                                                                                                                                   |
| 2740 | Homozygous<br>PS in RH | PGSC0003DMG40000<br>3351 | PGSC0003DMT4000<br>08648 | chr05 | NO  | NO  |                                                                                                                                                                                                                                                                                                   |

|      |                        |                          |                          |       |     |     |                                                                                                                                                                            |
|------|------------------------|--------------------------|--------------------------|-------|-----|-----|----------------------------------------------------------------------------------------------------------------------------------------------------------------------------|
| 2741 | Homozygous<br>PS in RH | PGSC0003DMG40000<br>3374 | PGSC0003DMT4000<br>08698 | -     | NO  | NO  |                                                                                                                                                                            |
| 2742 | Homozygous<br>PS in RH | PGSC0003DMG40000<br>3421 | PGSC0003DMT4000<br>08810 | chr06 | NO  | NO  |                                                                                                                                                                            |
| 2743 | Homozygous<br>PS in RH | PGSC0003DMG40000<br>3587 | PGSC0003DMT4000<br>09240 | chr07 | NO  | NO  |                                                                                                                                                                            |
| 2744 | Homozygous<br>PS in RH | PGSC0003DMG40000<br>3593 | PGSC0003DMT4000<br>09258 | chr10 | NO  | NO  |                                                                                                                                                                            |
| 2745 | Homozygous<br>PS in RH | PGSC0003DMG40000<br>3814 | PGSC0003DMT4000<br>09748 | chr05 | yes | NO  | GO:0008146; sulfotransferase activity;<br>Molecular Function                                                                                                               |
| 2746 | Homozygous<br>PS in RH | PGSC0003DMG40000<br>3836 | PGSC0003DMT4000<br>09801 | chr04 | yes | NO  |                                                                                                                                                                            |
| 2747 | Homozygous<br>PS in RH | PGSC0003DMG40000<br>3879 | PGSC0003DMT4000<br>09897 | chr06 | yes | yes |                                                                                                                                                                            |
| 2748 | Homozygous<br>PS in RH | PGSC0003DMG40000<br>3903 | PGSC0003DMT4000<br>09973 | chr09 | NO  | NO  |                                                                                                                                                                            |
| 2749 | Homozygous<br>PS in RH | PGSC0003DMG40000<br>3946 | PGSC0003DMT4000<br>10077 | chr05 | yes | yes | GO:0005515; protein binding; Molecular<br>Function GO:0005524; ATP binding;<br>Molecular Function GO:0044267; cellular<br>protein metabolic process; Biological<br>Process |
| 2750 | Homozygous<br>PS in RH | PGSC0003DMG40200<br>3998 | PGSC0003DMT4000<br>10206 | chr10 | NO  | NO  |                                                                                                                                                                            |
| 2751 | Homozygous<br>PS in RH | PGSC0003DMG40000<br>4134 | PGSC0003DMT4000<br>10582 | chr02 | yes | NO  |                                                                                                                                                                            |
| 2752 | Homozygous<br>PS in RH | PGSC0003DMG40000<br>4271 | PGSC0003DMT4000<br>10905 | chr09 | yes | yes |                                                                                                                                                                            |
| 2753 | Homozygous<br>PS in RH | PGSC0003DMG40000<br>4307 | PGSC0003DMT4000<br>10994 | chr01 | NO  | NO  |                                                                                                                                                                            |
| 2754 | Homozygous<br>PS in RH | PGSC0003DMG40000<br>4360 | PGSC0003DMT4000<br>11144 | chr11 | yes | NO  |                                                                                                                                                                            |
| 2755 | Homozygous<br>PS in RH | PGSC0003DMG40000<br>4711 | PGSC0003DMT4000<br>12003 | chr08 | NO  | NO  |                                                                                                                                                                            |
| 2756 | Homozygous<br>PS in RH | PGSC0003DMG40000<br>4714 | PGSC0003DMT4000<br>12008 | -     | yes | yes | GO:0003824; catalytic activity; Molecular<br>Function GO:0008152; metabolic process;<br>Biological Process                                                                 |
| 2757 | Homozygous<br>PS in RH | PGSC0003DMG40000<br>4721 | PGSC0003DMT4000<br>12031 | chr03 | yes | NO  | GO:0003723; RNA binding; Molecular<br>Function                                                                                                                             |

|      |                        |                          |                          |       |     |     |                                                                                                                                                                                                                                               |
|------|------------------------|--------------------------|--------------------------|-------|-----|-----|-----------------------------------------------------------------------------------------------------------------------------------------------------------------------------------------------------------------------------------------------|
| 2758 | Homozygous<br>PS in RH | PGSC0003DMG40000<br>4780 | PGSC0003DMT4000<br>12203 | chr12 | yes | yes |                                                                                                                                                                                                                                               |
| 2759 | Homozygous<br>PS in RH | PGSC0003DMG40000<br>4814 | PGSC0003DMT4000<br>12266 | -     | NO  | NO  |                                                                                                                                                                                                                                               |
| 2760 | Homozygous<br>PS in RH | PGSC0003DMG40000<br>4828 | PGSC0003DMT4000<br>12322 | chr06 | yes | NO  | GO:0016491; oxidoreductase activity;<br>Molecular Function                                                                                                                                                                                    |
| 2761 | Homozygous<br>PS in RH | PGSC0003DMG40000<br>4829 | PGSC0003DMT4000<br>12323 | chr06 | NO  | NO  |                                                                                                                                                                                                                                               |
| 2762 | Homozygous<br>PS in RH | PGSC0003DMG40000<br>4915 | PGSC0003DMT4000<br>12574 | chr03 | NO  | NO  |                                                                                                                                                                                                                                               |
| 2763 | Homozygous<br>PS in RH | PGSC0003DMG40000<br>4961 | PGSC0003DMT4000<br>12730 | chr06 | yes | yes | GO:0005515; protein binding; Molecular<br>Function                                                                                                                                                                                            |
| 2764 | Homozygous<br>PS in RH | PGSC0003DMG40000<br>4966 | PGSC0003DMT4000<br>12744 | chr03 | NO  | NO  | GO:0004867; serine-type endopeptidase<br>inhibitor activity; Molecular Function                                                                                                                                                               |
| 2765 | Homozygous<br>PS in RH | PGSC0003DMG40000<br>5010 | PGSC0003DMT4000<br>12867 | chr04 | NO  | NO  |                                                                                                                                                                                                                                               |
| 2766 | Homozygous<br>PS in RH | PGSC0003DMG40000<br>5046 | PGSC0003DMT4000<br>12949 | chr07 | yes | NO  | GO:0006812; cation transport; Biological<br>Process GO:0008324; cation<br>transmembrane transporter activity;<br>Molecular Function GO:0016020;<br>membrane; Cellular Component<br>GO:0055085; transmembrane transport;<br>Biological Process |
| 2767 | Homozygous<br>PS in RH | PGSC0003DMG40000<br>5076 | PGSC0003DMT4000<br>13028 | chr06 | yes | yes | GO:0005524; ATP binding; Molecular<br>Function GO:0006915; apoptosis;<br>Biological Process                                                                                                                                                   |
| 2768 | Homozygous<br>PS in RH | PGSC0003DMG40000<br>5207 | PGSC0003DMT4000<br>13354 | chr03 | yes | yes | GO:0031072; heat shock protein binding;<br>Molecular Function                                                                                                                                                                                 |
| 2769 | Homozygous<br>PS in RH | PGSC0003DMG40000<br>5351 | PGSC0003DMT4000<br>13687 | chr06 | NO  | NO  | GO:0005743; mitochondrial inner<br>membrane; Cellular Component<br>GO:0008565; protein transporter activity;<br>Molecular Function GO:0015031; protein<br>transport; Biological Process                                                       |
| 2770 | Homozygous<br>PS in RH | PGSC0003DMG40000<br>5566 | PGSC0003DMT4000<br>14199 | chr01 | yes | NO  |                                                                                                                                                                                                                                               |
| 2771 | Homozygous<br>PS in RH | PGSC0003DMG40000<br>5613 | PGSC0003DMT4000<br>14305 | chr09 | NO  | NO  |                                                                                                                                                                                                                                               |

|      |                        |                          |                          |       |     |     |                                                                                                                                                                                                                                                                                                                                                     |
|------|------------------------|--------------------------|--------------------------|-------|-----|-----|-----------------------------------------------------------------------------------------------------------------------------------------------------------------------------------------------------------------------------------------------------------------------------------------------------------------------------------------------------|
| 2772 | Homozygous<br>PS in RH | PGSC0003DMG40000<br>5666 | PGSC0003DMT4000<br>14442 | chr09 | NO  | NO  |                                                                                                                                                                                                                                                                                                                                                     |
| 2773 | Homozygous<br>PS in RH | PGSC0003DMG40000<br>5722 | PGSC0003DMT4000<br>14646 | chr11 | NO  | NO  | GO:0005524; ATP binding; Molecular Function GO:0006810; transport; Biological Process GO:0016021; integral to membrane; Cellular Component GO:0016887; ATPase activity; Molecular Function GO:0042626; ATPase activity, coupled to transmembrane movement of substances; Molecular Function GO:0055085; transmembrane transport; Biological Process |
| 2774 | Homozygous<br>PS in RH | PGSC0003DMG40000<br>5749 | PGSC0003DMT4000<br>14749 | chr09 | yes | NO  |                                                                                                                                                                                                                                                                                                                                                     |
| 2775 | Homozygous<br>PS in RH | PGSC0003DMG40000<br>5901 | PGSC0003DMT4000<br>15093 | chr12 | NO  | NO  |                                                                                                                                                                                                                                                                                                                                                     |
| 2776 | Homozygous<br>PS in RH | PGSC0003DMG40000<br>5920 | PGSC0003DMT4000<br>15160 | chr10 | yes | NO  |                                                                                                                                                                                                                                                                                                                                                     |
| 2777 | Homozygous<br>PS in RH | PGSC0003DMG40000<br>6044 | PGSC0003DMT4000<br>15480 | chr12 | NO  | NO  |                                                                                                                                                                                                                                                                                                                                                     |
| 2778 | Homozygous<br>PS in RH | PGSC0003DMG40000<br>6048 | PGSC0003DMT4000<br>15484 | chr07 | yes | yes |                                                                                                                                                                                                                                                                                                                                                     |
| 2779 | Homozygous<br>PS in RH | PGSC0003DMG40200<br>6174 | PGSC0003DMT4000<br>15796 | -     | NO  | NO  |                                                                                                                                                                                                                                                                                                                                                     |
| 2780 | Homozygous<br>PS in RH | PGSC0003DMG40000<br>6318 | PGSC0003DMT4000<br>16166 | chr10 | NO  | NO  |                                                                                                                                                                                                                                                                                                                                                     |
| 2781 | Homozygous<br>PS in RH | PGSC0003DMG40000<br>6384 | PGSC0003DMT4000<br>16336 | chr09 | yes | NO  |                                                                                                                                                                                                                                                                                                                                                     |
| 2782 | Homozygous<br>PS in RH | PGSC0003DMG40000<br>6556 | PGSC0003DMT4000<br>16766 | chr07 | yes | yes |                                                                                                                                                                                                                                                                                                                                                     |
| 2783 | Homozygous<br>PS in RH | PGSC0003DMG40100<br>6819 | PGSC0003DMT4000<br>17577 | chr02 | yes | NO  | GO:0016021; integral to membrane; Cellular Component                                                                                                                                                                                                                                                                                                |
| 2784 | Homozygous<br>PS in RH | PGSC0003DMG40000<br>6838 | PGSC0003DMT4000<br>17631 | chr06 | NO  | NO  |                                                                                                                                                                                                                                                                                                                                                     |
| 2785 | Homozygous<br>PS in RH | PGSC0003DMG40000<br>6972 | PGSC0003DMT4000<br>17957 | chr09 | NO  | NO  |                                                                                                                                                                                                                                                                                                                                                     |
| 2786 | Homozygous<br>PS in RH | PGSC0003DMG40100<br>7052 | PGSC0003DMT4000<br>18165 | chr09 | NO  | NO  |                                                                                                                                                                                                                                                                                                                                                     |

|      |                        |                          |                          |       |     |     |                                                                                                                                                                                                                                     |
|------|------------------------|--------------------------|--------------------------|-------|-----|-----|-------------------------------------------------------------------------------------------------------------------------------------------------------------------------------------------------------------------------------------|
| 2787 | Homozygous<br>PS in RH | PGSC0003DMG40000<br>7205 | PGSC0003DMT4000<br>18569 | chr06 | yes | NO  |                                                                                                                                                                                                                                     |
| 2788 | Homozygous<br>PS in RH | PGSC0003DMG40000<br>7217 | PGSC0003DMT4000<br>18596 | chr05 | yes | NO  | GO:0006508; proteolysis; Biological Process<br>GO:0008234; cysteine-type peptidase activity; Molecular Function                                                                                                                     |
| 2789 | Homozygous<br>PS in RH | PGSC0003DMG40000<br>7219 | PGSC0003DMT4000<br>18608 | chr06 | NO  | NO  |                                                                                                                                                                                                                                     |
| 2790 | Homozygous<br>PS in RH | PGSC0003DMG40000<br>7301 | PGSC0003DMT4000<br>18832 | chr01 | yes | yes |                                                                                                                                                                                                                                     |
| 2791 | Homozygous<br>PS in RH | PGSC0003DMG40000<br>7340 | PGSC0003DMT4000<br>18927 | -     | NO  | NO  |                                                                                                                                                                                                                                     |
| 2792 | Homozygous<br>PS in RH | PGSC0003DMG40000<br>7341 | PGSC0003DMT4000<br>18933 | chr02 | yes | yes | GO:0008152; metabolic process; Biological Process<br>GO:0016787; hydrolase activity; Molecular Function                                                                                                                             |
| 2793 | Homozygous<br>PS in RH | PGSC0003DMG40100<br>7356 | PGSC0003DMT4000<br>18985 | chr10 | yes | NO  |                                                                                                                                                                                                                                     |
| 2794 | Homozygous<br>PS in RH | PGSC0003DMG40000<br>7485 | PGSC0003DMT4000<br>19352 | chr10 | NO  | NO  |                                                                                                                                                                                                                                     |
| 2795 | Homozygous<br>PS in RH | PGSC0003DMG40000<br>7505 | PGSC0003DMT4000<br>19413 | chr01 | NO  | NO  |                                                                                                                                                                                                                                     |
| 2796 | Homozygous<br>PS in RH | PGSC0003DMG40100<br>7615 | PGSC0003DMT4000<br>19715 | -     | yes | NO  | GO:0005515; protein binding; Molecular Function                                                                                                                                                                                     |
| 2797 | Homozygous<br>PS in RH | PGSC0003DMG40000<br>7687 | PGSC0003DMT4000<br>19872 | -     | yes | NO  |                                                                                                                                                                                                                                     |
| 2798 | Homozygous<br>PS in RH | PGSC0003DMG40200<br>7845 | PGSC0003DMT4000<br>20293 | chr10 | NO  | NO  | GO:0004672; protein kinase activity; Molecular Function<br>GO:0005524; ATP binding; Molecular Function<br>GO:0006468; protein amino acid phosphorylation; Biological Process                                                        |
| 2799 | Homozygous<br>PS in RH | PGSC0003DMG40100<br>7901 | PGSC0003DMT4000<br>20450 | chr07 | NO  | NO  |                                                                                                                                                                                                                                     |
| 2800 | Homozygous<br>PS in RH | PGSC0003DMG40000<br>7946 | PGSC0003DMT4000<br>20516 | chr05 | yes | yes | GO:0004672; protein kinase activity; Molecular Function<br>GO:0005524; ATP binding; Molecular Function<br>GO:0006468; protein amino acid phosphorylation; Biological Process<br>GO:0007165; signal transduction; Biological Process |

|      |                        |                          |                          |       |     |     |                                                                                                                     |
|------|------------------------|--------------------------|--------------------------|-------|-----|-----|---------------------------------------------------------------------------------------------------------------------|
| 2801 | Homozygous<br>PS in RH | PGSC0003DMG40000<br>8142 | PGSC0003DMT4000<br>21030 | -     | NO  | NO  | GO:0004190; aspartic-type endopeptidase activity; Molecular Function<br>GO:0006508; proteolysis; Biological Process |
| 2802 | Homozygous<br>PS in RH | PGSC0003DMG40000<br>8189 | PGSC0003DMT4000<br>21145 | chr01 | yes | NO  |                                                                                                                     |
| 2803 | Homozygous<br>PS in RH | PGSC0003DMG40000<br>8191 | PGSC0003DMT4000<br>21155 | chr12 | yes | NO  |                                                                                                                     |
| 2804 | Homozygous<br>PS in RH | PGSC0003DMG40100<br>8350 | PGSC0003DMT4000<br>21529 | -     | yes | NO  |                                                                                                                     |
| 2805 | Homozygous<br>PS in RH | PGSC0003DMG40000<br>8396 | PGSC0003DMT4000<br>21640 | chr10 | NO  | NO  |                                                                                                                     |
| 2806 | Homozygous<br>PS in RH | PGSC0003DMG40000<br>8425 | PGSC0003DMT4000<br>21711 | chr08 | yes | NO  |                                                                                                                     |
| 2807 | Homozygous<br>PS in RH | PGSC0003DMG40000<br>8507 | PGSC0003DMT4000<br>21933 | chr01 | NO  | NO  |                                                                                                                     |
| 2808 | Homozygous<br>PS in RH | PGSC0003DMG40000<br>8611 | PGSC0003DMT4000<br>22191 | chr02 | yes | NO  |                                                                                                                     |
| 2809 | Homozygous<br>PS in RH | PGSC0003DMG40000<br>8914 | PGSC0003DMT4000<br>23033 | -     | NO  | NO  |                                                                                                                     |
| 2810 | Homozygous<br>PS in RH | PGSC0003DMG40000<br>8981 | PGSC0003DMT4000<br>23188 | chr11 | yes | NO  | GO:0005524; ATP binding; Molecular Function<br>GO:0006915; apoptosis; Biological Process                            |
| 2811 | Homozygous<br>PS in RH | PGSC0003DMG40000<br>9006 | PGSC0003DMT4000<br>23253 | chr11 | yes | yes |                                                                                                                     |
| 2812 | Homozygous<br>PS in RH | PGSC0003DMG40000<br>9035 | PGSC0003DMT4000<br>23324 | chr04 | NO  | NO  |                                                                                                                     |
| 2813 | Homozygous<br>PS in RH | PGSC0003DMG40000<br>9059 | PGSC0003DMT4000<br>23388 | chr12 | yes | NO  |                                                                                                                     |
| 2814 | Homozygous<br>PS in RH | PGSC0003DMG40000<br>9195 | PGSC0003DMT4000<br>23774 | chr01 | NO  | NO  |                                                                                                                     |
| 2815 | Homozygous<br>PS in RH | PGSC0003DMG40000<br>9239 | PGSC0003DMT4000<br>23895 | chr12 | NO  | NO  |                                                                                                                     |
| 2816 | Homozygous<br>PS in RH | PGSC0003DMG40000<br>9253 | PGSC0003DMT4000<br>23930 | chr12 | NO  | NO  |                                                                                                                     |
| 2817 | Homozygous<br>PS in RH | PGSC0003DMG40200<br>9322 | PGSC0003DMT4000<br>24106 | -     | yes | NO  |                                                                                                                     |

|      |                        |                          |                          |       |     |     |                                                                                                                                 |
|------|------------------------|--------------------------|--------------------------|-------|-----|-----|---------------------------------------------------------------------------------------------------------------------------------|
| 2818 | Homozygous<br>PS in RH | PGSC0003DMG40200<br>9323 | PGSC0003DMT4000<br>24109 | chr03 | NO  | NO  |                                                                                                                                 |
| 2819 | Homozygous<br>PS in RH | PGSC0003DMG40000<br>9404 | PGSC0003DMT4000<br>24325 | chr06 | NO  | NO  |                                                                                                                                 |
| 2820 | Homozygous<br>PS in RH | PGSC0003DMG40000<br>9707 | PGSC0003DMT4000<br>25123 | chr08 | yes | NO  |                                                                                                                                 |
| 2821 | Homozygous<br>PS in RH | PGSC0003DMG40000<br>9747 | PGSC0003DMT4000<br>25228 | chr09 | yes | NO  |                                                                                                                                 |
| 2822 | Homozygous<br>PS in RH | PGSC0003DMG40200<br>9879 | PGSC0003DMT4000<br>25569 | chr10 | yes | NO  | GO:0030528; transcription regulator activity; Molecular Function<br>GO:0045449; regulation of transcription; Biological Process |
| 2823 | Homozygous<br>PS in RH | PGSC0003DMG40000<br>9880 | PGSC0003DMT4000<br>25571 | chr12 | yes | NO  | GO:0004650; polygalacturonase activity; Molecular Function<br>GO:0005975; carbohydrate metabolic process; Biological Process    |
| 2824 | Homozygous<br>PS in RH | PGSC0003DMG40001<br>0031 | PGSC0003DMT4000<br>25989 | chr10 | yes | NO  |                                                                                                                                 |
| 2825 | Homozygous<br>PS in RH | PGSC0003DMG40001<br>0084 | PGSC0003DMT4000<br>26168 | chr09 | yes | NO  |                                                                                                                                 |
| 2826 | Homozygous<br>PS in RH | PGSC0003DMG40001<br>0228 | PGSC0003DMT4000<br>26499 | chr03 | NO  | NO  |                                                                                                                                 |
| 2827 | Homozygous<br>PS in RH | PGSC0003DMG40001<br>0386 | PGSC0003DMT4000<br>26930 | chr09 | NO  | NO  |                                                                                                                                 |
| 2828 | Homozygous<br>PS in RH | PGSC0003DMG40001<br>0442 | PGSC0003DMT4000<br>27073 | chr03 | yes | NO  |                                                                                                                                 |
| 2829 | Homozygous<br>PS in RH | PGSC0003DMG40001<br>0559 | PGSC0003DMT4000<br>27382 | chr06 | NO  | NO  |                                                                                                                                 |
| 2830 | Homozygous<br>PS in RH | PGSC0003DMG40001<br>0604 | PGSC0003DMT4000<br>27512 | chr06 | NO  | NO  |                                                                                                                                 |
| 2831 | Homozygous<br>PS in RH | PGSC0003DMG40001<br>0672 | PGSC0003DMT4000<br>27685 | chr03 | NO  | NO  |                                                                                                                                 |
| 2832 | Homozygous<br>PS in RH | PGSC0003DMG40001<br>0683 | PGSC0003DMT4000<br>27724 | chr05 | NO  | NO  |                                                                                                                                 |
| 2833 | Homozygous<br>PS in RH | PGSC0003DMG40001<br>0774 | PGSC0003DMT4000<br>27962 | chr08 | yes | yes | GO:0005524; ATP binding; Molecular Function<br>GO:0006915; apoptosis; Biological Process                                        |

|      |                        |                          |                          |       |     |     |                                                                                                                                                                                        |
|------|------------------------|--------------------------|--------------------------|-------|-----|-----|----------------------------------------------------------------------------------------------------------------------------------------------------------------------------------------|
| 2834 | Homozygous<br>PS in RH | PGSC0003DMG40001<br>0813 | PGSC0003DMT4000<br>28038 | chr12 | NO  | NO  | GO:0008060; ARF GTPase activator activity; Molecular Function<br>GO:0008270; zinc ion binding; Molecular Function<br>GO:0032312; regulation of ARF GTPase activity; Biological Process |
| 2835 | Homozygous<br>PS in RH | PGSC0003DMG40201<br>0918 | PGSC0003DMT4000<br>28324 | chr09 | yes | NO  |                                                                                                                                                                                        |
| 2836 | Homozygous<br>PS in RH | PGSC0003DMG40201<br>1001 | PGSC0003DMT4000<br>28574 | chr09 | yes | NO  | GO:0016491; oxidoreductase activity; Molecular Function                                                                                                                                |
| 2837 | Homozygous<br>PS in RH | PGSC0003DMG40001<br>1035 | PGSC0003DMT4000<br>28660 | -     | NO  | NO  |                                                                                                                                                                                        |
| 2838 | Homozygous<br>PS in RH | PGSC0003DMG40001<br>1116 | PGSC0003DMT4000<br>28886 | chr03 | yes | NO  | GO:0005524; ATP binding; Molecular Function<br>GO:0006915; apoptosis; Biological Process                                                                                               |
| 2839 | Homozygous<br>PS in RH | PGSC0003DMG40001<br>1236 | PGSC0003DMT4000<br>29207 | chr12 | yes | NO  |                                                                                                                                                                                        |
| 2840 | Homozygous<br>PS in RH | PGSC0003DMG40001<br>1359 | PGSC0003DMT4000<br>29528 | chr05 | NO  | NO  |                                                                                                                                                                                        |
| 2841 | Homozygous<br>PS in RH | PGSC0003DMG40001<br>1661 | PGSC0003DMT4000<br>30446 | chr09 | NO  | NO  |                                                                                                                                                                                        |
| 2842 | Homozygous<br>PS in RH | PGSC0003DMG40001<br>1788 | PGSC0003DMT4000<br>30773 | chr08 | NO  | NO  |                                                                                                                                                                                        |
| 2843 | Homozygous<br>PS in RH | PGSC0003DMG40001<br>1885 | PGSC0003DMT4000<br>31020 | chr06 | yes | yes |                                                                                                                                                                                        |
| 2844 | Homozygous<br>PS in RH | PGSC0003DMG40001<br>2041 | PGSC0003DMT4000<br>31411 | chr05 | NO  | NO  |                                                                                                                                                                                        |
| 2845 | Homozygous<br>PS in RH | PGSC0003DMG40001<br>2045 | PGSC0003DMT4000<br>31418 | chr01 | NO  | NO  |                                                                                                                                                                                        |
| 2846 | Homozygous<br>PS in RH | PGSC0003DMG40001<br>2073 | PGSC0003DMT4000<br>31487 | chr10 | yes | yes |                                                                                                                                                                                        |
| 2847 | Homozygous<br>PS in RH | PGSC0003DMG40001<br>2181 | PGSC0003DMT4000<br>31751 | -     | yes | NO  |                                                                                                                                                                                        |
| 2848 | Homozygous<br>PS in RH | PGSC0003DMG40001<br>2424 | PGSC0003DMT4000<br>32345 | chr01 | yes | NO  |                                                                                                                                                                                        |



|      |                        |                          |                          |       |     |     |                                                                                                                                                                                                                         |
|------|------------------------|--------------------------|--------------------------|-------|-----|-----|-------------------------------------------------------------------------------------------------------------------------------------------------------------------------------------------------------------------------|
| 2849 | Homozygous<br>PS in RH | PGSC0003DMG40001<br>2563 | PGSC0003DMT4000<br>32716 | chr03 | yes | yes | GO:0004672; protein kinase activity;<br>Molecular Function GO:0005524; ATP<br>binding; Molecular Function<br>GO:0006468; protein amino acid<br>phosphorylation; Biological Process                                      |
| 2850 | Homozygous<br>PS in RH | PGSC0003DMG40001<br>2616 | PGSC0003DMT4000<br>32846 | chr09 | yes | yes | GO:0003677; DNA binding; Molecular<br>Function GO:0003916; DNA<br>topoisomerase activity; Molecular<br>Function GO:0005694; chromosome;<br>Cellular Component GO:0006265; DNA<br>topological change; Biological Process |
| 2851 | Homozygous<br>PS in RH | PGSC0003DMG40001<br>2645 | PGSC0003DMT4000<br>32922 | chr11 | yes | NO  |                                                                                                                                                                                                                         |
| 2852 | Homozygous<br>PS in RH | PGSC0003DMG40001<br>2661 | PGSC0003DMT4000<br>32968 | chr12 | NO  | NO  |                                                                                                                                                                                                                         |
| 2853 | Homozygous<br>PS in RH | PGSC0003DMG40001<br>2702 | PGSC0003DMT4000<br>33080 | -     | NO  | NO  |                                                                                                                                                                                                                         |
| 2854 | Homozygous<br>PS in RH | PGSC0003DMG40001<br>2705 | PGSC0003DMT4000<br>33085 | chr12 | NO  | NO  |                                                                                                                                                                                                                         |
| 2855 | Homozygous<br>PS in RH | PGSC0003DMG40001<br>2721 | PGSC0003DMT4000<br>33129 | -     | NO  | NO  |                                                                                                                                                                                                                         |
| 2856 | Homozygous<br>PS in RH | PGSC0003DMG40001<br>2749 | PGSC0003DMT4000<br>33202 | chr10 | NO  | NO  |                                                                                                                                                                                                                         |
| 2857 | Homozygous<br>PS in RH | PGSC0003DMG40001<br>2831 | PGSC0003DMT4000<br>33396 | chr05 | yes | NO  |                                                                                                                                                                                                                         |
| 2858 | Homozygous<br>PS in RH | PGSC0003DMG40001<br>2857 | PGSC0003DMT4000<br>33471 | chr02 | NO  | NO  |                                                                                                                                                                                                                         |
| 2859 | Homozygous<br>PS in RH | PGSC0003DMG40001<br>2876 | PGSC0003DMT4000<br>33518 | chr03 | yes | yes |                                                                                                                                                                                                                         |
| 2860 | Homozygous<br>PS in RH | PGSC0003DMG40001<br>3079 | PGSC0003DMT4000<br>34025 | chr06 | NO  | NO  |                                                                                                                                                                                                                         |
| 2861 | Homozygous<br>PS in RH | PGSC0003DMG40001<br>3181 | PGSC0003DMT4000<br>34284 | chr01 | yes | NO  | GO:0004356; glutamate-ammonia ligase<br>activity; Molecular Function<br>GO:0006807; nitrogen compound<br>metabolic process; Biological Process                                                                          |
| 2862 | Homozygous<br>PS in RH | PGSC0003DMG40001<br>3222 | PGSC0003DMT4000<br>34384 | chr07 | NO  | NO  |                                                                                                                                                                                                                         |

|      |                        |                          |                          |       |     |     |                                                                                                                                                                                                                                                                                                                                                                                                  |
|------|------------------------|--------------------------|--------------------------|-------|-----|-----|--------------------------------------------------------------------------------------------------------------------------------------------------------------------------------------------------------------------------------------------------------------------------------------------------------------------------------------------------------------------------------------------------|
| 2863 | Homozygous<br>PS in RH | PGSC0003DMG40101<br>3254 | PGSC0003DMT4000<br>34481 | chr04 | NO  | NO  |                                                                                                                                                                                                                                                                                                                                                                                                  |
| 2864 | Homozygous<br>PS in RH | PGSC0003DMG40001<br>3294 | PGSC0003DMT4000<br>34588 | chr09 | NO  | NO  | GO:0006508; proteolysis; Biological Process GO:0008234; cysteine-type peptidase activity; Molecular Function GO:0004672; protein kinase activity; Molecular Function GO:0005515; protein binding; Molecular Function GO:0005524; ATP binding; Molecular Function GO:0006468; protein amino acid phosphorylation; Biological Process GO:0005198; structural molecule activity; Molecular Function |
| 2865 | Homozygous<br>PS in RH | PGSC0003DMG40201<br>3295 | PGSC0003DMT4000<br>34593 | chr06 | yes | yes | GO:0005524; ATP binding; Molecular Function GO:0006468; protein amino acid phosphorylation; Biological Process                                                                                                                                                                                                                                                                                   |
| 2866 | Homozygous<br>PS in RH | PGSC0003DMG40001<br>3320 | PGSC0003DMT4000<br>34659 | chr08 | NO  | NO  | GO:0005198; structural molecule activity; Molecular Function                                                                                                                                                                                                                                                                                                                                     |
| 2867 | Homozygous<br>PS in RH | PGSC0003DMG40001<br>3407 | PGSC0003DMT4000<br>34883 | chr05 | yes | yes | GO:0005524; ATP binding; Molecular Function GO:0006915; apoptosis; Biological Process                                                                                                                                                                                                                                                                                                            |
| 2868 | Homozygous<br>PS in RH | PGSC0003DMG40001<br>3498 | PGSC0003DMT4000<br>35105 | chr07 | yes | yes | GO:0006855; multidrug transport; Biological Process GO:0015238; drug transporter activity; Molecular Function GO:0015297; antiporter activity; Molecular Function GO:0016020; membrane; Cellular Component GO:0055085; transmembrane transport; Biological Process                                                                                                                               |
| 2869 | Homozygous<br>PS in RH | PGSC0003DMG40001<br>3511 | PGSC0003DMT4000<br>35152 | chr02 | yes | NO  |                                                                                                                                                                                                                                                                                                                                                                                                  |
| 2870 | Homozygous<br>PS in RH | PGSC0003DMG40001<br>3518 | PGSC0003DMT4000<br>35172 | chr04 | yes | NO  | GO:0004672; protein kinase activity; Molecular Function GO:0005515; protein binding; Molecular Function GO:0005524; ATP binding; Molecular Function GO:0006468; protein amino acid phosphorylation; Biological Process                                                                                                                                                                           |
| 2871 | Homozygous<br>PS in RH | PGSC0003DMG40201<br>3630 | PGSC0003DMT4000<br>35459 | chr01 | yes | NO  |                                                                                                                                                                                                                                                                                                                                                                                                  |
| 2872 | Homozygous<br>PS in RH | PGSC0003DMG40001<br>3736 | PGSC0003DMT4000<br>35714 | chr02 | NO  | NO  |                                                                                                                                                                                                                                                                                                                                                                                                  |
| 2873 | Homozygous<br>PS in RH | PGSC0003DMG40001<br>3889 | PGSC0003DMT4000<br>36058 | chr01 | yes | NO  |                                                                                                                                                                                                                                                                                                                                                                                                  |

|      |                        |                          |                          |       |     |     |                                                                                                                                                                                                                                                                                                 |
|------|------------------------|--------------------------|--------------------------|-------|-----|-----|-------------------------------------------------------------------------------------------------------------------------------------------------------------------------------------------------------------------------------------------------------------------------------------------------|
| 2874 | Homozygous<br>PS in RH | PGSC0003DMG40101<br>3919 | PGSC0003DMT4000<br>36145 | chr01 | NO  | NO  | GO:0004672; protein kinase activity;<br>Molecular Function GO:0005524; ATP<br>binding; Molecular Function<br>GO:0005529; sugar binding; Molecular<br>Function GO:0006468; protein amino acid<br>phosphorylation; Biological Process<br>GO:0048544; recognition of pollen;<br>Biological Process |
| 2875 | Homozygous<br>PS in RH | PGSC0003DMG40001<br>4125 | PGSC0003DMT4000<br>36630 | chr02 | NO  | NO  |                                                                                                                                                                                                                                                                                                 |
| 2876 | Homozygous<br>PS in RH | PGSC0003DMG40001<br>4130 | PGSC0003DMT4000<br>36638 | chr04 | yes | NO  | GO:0005515; protein binding; Molecular<br>Function                                                                                                                                                                                                                                              |
| 2877 | Homozygous<br>PS in RH | PGSC0003DMG40101<br>4139 | PGSC0003DMT4000<br>36656 | chr04 | NO  | NO  |                                                                                                                                                                                                                                                                                                 |
| 2878 | Homozygous<br>PS in RH | PGSC0003DMG40001<br>4152 | PGSC0003DMT4000<br>36695 | chr12 | yes | NO  | GO:0016021; integral to membrane;<br>Cellular Component GO:0016758;<br>transferase activity, transferring hexosyl<br>groups; Molecular Function                                                                                                                                                 |
| 2879 | Homozygous<br>PS in RH | PGSC0003DMG40001<br>4382 | PGSC0003DMT4000<br>37280 | chr09 | yes | yes |                                                                                                                                                                                                                                                                                                 |
| 2880 | Homozygous<br>PS in RH | PGSC0003DMG40001<br>4424 | PGSC0003DMT4000<br>37390 | chr12 | yes | NO  | GO:0005524; ATP binding; Molecular<br>Function GO:0006915; apoptosis;<br>Biological Process                                                                                                                                                                                                     |
| 2881 | Homozygous<br>PS in RH | PGSC0003DMG40001<br>4492 | PGSC0003DMT4000<br>37569 | -     | yes | NO  |                                                                                                                                                                                                                                                                                                 |
| 2882 | Homozygous<br>PS in RH | PGSC0003DMG40001<br>4585 | PGSC0003DMT4000<br>37804 | chr06 | yes | NO  |                                                                                                                                                                                                                                                                                                 |
| 2883 | Homozygous<br>PS in RH | PGSC0003DMG40001<br>4600 | PGSC0003DMT4000<br>37843 | chr12 | NO  | NO  | GO:0005779; integral to peroxisomal<br>membrane; Cellular Component<br>GO:0007031; peroxisome organization;<br>Biological Process                                                                                                                                                               |
| 2884 | Homozygous<br>PS in RH | PGSC0003DMG40001<br>4616 | PGSC0003DMT4000<br>37885 | chr11 | yes | NO  |                                                                                                                                                                                                                                                                                                 |
| 2885 | Homozygous<br>PS in RH | PGSC0003DMG40001<br>4678 | PGSC0003DMT4000<br>38068 |       |     |     |                                                                                                                                                                                                                                                                                                 |
| 2886 | Homozygous<br>PS in RH | PGSC0003DMG40001<br>4766 | PGSC0003DMT4000<br>38273 | chr05 | yes | NO  |                                                                                                                                                                                                                                                                                                 |

|      |                        |                          |                          |       |     |     |                                                                                                                                                                                                                                                                                         |
|------|------------------------|--------------------------|--------------------------|-------|-----|-----|-----------------------------------------------------------------------------------------------------------------------------------------------------------------------------------------------------------------------------------------------------------------------------------------|
| 2887 | Homozygous<br>PS in RH | PGSC0003DMG40001<br>4862 | PGSC0003DMT4000<br>38500 | -     | NO  | NO  |                                                                                                                                                                                                                                                                                         |
| 2888 | Homozygous<br>PS in RH | PGSC0003DMG40001<br>4888 | PGSC0003DMT4000<br>38548 | -     | yes | NO  | GO:0004568; chitinase activity;<br>Molecular Function GO:0006032; chitin<br>catabolic process; Biological Process<br>GO:0008061; chitin binding; Molecular<br>Function GO:0016998; cell wall<br>macromolecule catabolic process;<br>Biological Process                                  |
| 2889 | Homozygous<br>PS in RH | PGSC0003DMG40001<br>4982 | PGSC0003DMT4000<br>38769 | -     | NO  | NO  |                                                                                                                                                                                                                                                                                         |
| 2890 | Homozygous<br>PS in RH | PGSC0003DMG40001<br>5020 | PGSC0003DMT4000<br>38863 | chr08 | yes | yes | GO:0003676; nucleic acid binding;<br>Molecular Function GO:0008270; zinc ion<br>binding; Molecular Function                                                                                                                                                                             |
| 2891 | Homozygous<br>PS in RH | PGSC0003DMG40001<br>5073 | PGSC0003DMT4000<br>38971 | chr06 | yes | NO  | GO:0016021; integral to membrane;<br>Cellular Component                                                                                                                                                                                                                                 |
| 2892 | Homozygous<br>PS in RH | PGSC0003DMG40001<br>5156 | PGSC0003DMT4000<br>39197 | chr06 | yes | yes | GO:0003677; DNA binding; Molecular<br>Function                                                                                                                                                                                                                                          |
| 2893 | Homozygous<br>PS in RH | PGSC0003DMG40001<br>5328 | PGSC0003DMT4000<br>39630 | chr01 | NO  | NO  |                                                                                                                                                                                                                                                                                         |
| 2894 | Homozygous<br>PS in RH | PGSC0003DMG40001<br>5340 | PGSC0003DMT4000<br>39662 | chr04 | yes | yes |                                                                                                                                                                                                                                                                                         |
| 2895 | Homozygous<br>PS in RH | PGSC0003DMG40001<br>5366 | PGSC0003DMT4000<br>39764 | chr09 | yes | NO  |                                                                                                                                                                                                                                                                                         |
| 2896 | Homozygous<br>PS in RH | PGSC0003DMG40001<br>5594 | PGSC0003DMT4000<br>40284 | chr08 | NO  | NO  | GO:0005515; protein binding; Molecular<br>Function                                                                                                                                                                                                                                      |
| 2897 | Homozygous<br>PS in RH | PGSC0003DMG40001<br>5801 | PGSC0003DMT4000<br>40868 | chr07 | yes | NO  |                                                                                                                                                                                                                                                                                         |
| 2898 | Homozygous<br>PS in RH | PGSC0003DMG40001<br>5821 | PGSC0003DMT4000<br>40902 | chr10 | yes | NO  | GO:0006855; multidrug transport;<br>Biological Process GO:0015238; drug<br>transporter activity; Molecular Function<br>GO:0015297; antiporter activity;<br>Molecular Function GO:0016020;<br>membrane; Cellular Component<br>GO:0055085; transmembrane transport;<br>Biological Process |
| 2899 | Homozygous<br>PS in RH | PGSC0003DMG40201<br>5867 | PGSC0003DMT4000<br>41013 | chr06 | yes | yes |                                                                                                                                                                                                                                                                                         |

|      |                        |                          |                          |       |     |    |                                                                                                                                              |
|------|------------------------|--------------------------|--------------------------|-------|-----|----|----------------------------------------------------------------------------------------------------------------------------------------------|
| 2900 | Homozygous<br>PS in RH | PGSC0003DMG40001<br>6061 | PGSC0003DMT4000<br>41441 | chr10 | NO  | NO |                                                                                                                                              |
| 2901 | Homozygous<br>PS in RH | PGSC0003DMG40001<br>6238 | PGSC0003DMT4000<br>41847 | -     | yes | NO | GO:0008152; metabolic process;<br>Biological Process GO:0016758;<br>transferase activity, transferring hexosyl<br>groups; Molecular Function |
| 2902 | Homozygous<br>PS in RH | PGSC0003DMG40001<br>6372 | PGSC0003DMT4000<br>42194 |       |     |    |                                                                                                                                              |
| 2903 | Homozygous<br>PS in RH | PGSC0003DMG40001<br>6524 | PGSC0003DMT4000<br>42609 |       |     |    |                                                                                                                                              |
| 2904 | Homozygous<br>PS in RH | PGSC0003DMG40001<br>6690 | PGSC0003DMT4000<br>43037 |       |     |    |                                                                                                                                              |
| 2905 | Homozygous<br>PS in RH | PGSC0003DMG40001<br>6734 | PGSC0003DMT4000<br>43126 |       |     |    |                                                                                                                                              |
| 2906 | Homozygous<br>PS in RH | PGSC0003DMG40001<br>6849 | PGSC0003DMT4000<br>43405 |       |     |    |                                                                                                                                              |
| 2907 | Homozygous<br>PS in RH | PGSC0003DMG40101<br>6929 | PGSC0003DMT4000<br>43597 |       |     |    |                                                                                                                                              |
| 2908 | Homozygous<br>PS in RH | PGSC0003DMG40001<br>7106 | PGSC0003DMT4000<br>44088 |       |     |    |                                                                                                                                              |
| 2909 | Homozygous<br>PS in RH | PGSC0003DMG40001<br>7125 | PGSC0003DMT4000<br>44123 |       |     |    |                                                                                                                                              |
| 2910 | Homozygous<br>PS in RH | PGSC0003DMG40001<br>7237 | PGSC0003DMT4000<br>44397 |       |     |    |                                                                                                                                              |
| 2911 | Homozygous<br>PS in RH | PGSC0003DMG40001<br>7332 | PGSC0003DMT4000<br>44679 |       |     |    |                                                                                                                                              |
| 2912 | Homozygous<br>PS in RH | PGSC0003DMG40001<br>7454 | PGSC0003DMT4000<br>45006 |       |     |    |                                                                                                                                              |
| 2913 | Homozygous<br>PS in RH | PGSC0003DMG40001<br>7458 | PGSC0003DMT4000<br>45026 |       |     |    |                                                                                                                                              |
| 2914 | Homozygous<br>PS in RH | PGSC0003DMG40001<br>7502 | PGSC0003DMT4000<br>45124 |       |     |    |                                                                                                                                              |
| 2915 | Homozygous<br>PS in RH | PGSC0003DMG40001<br>7637 | PGSC0003DMT4000<br>45466 |       |     |    |                                                                                                                                              |
| 2916 | Homozygous<br>PS in RH | PGSC0003DMG40001<br>7712 | PGSC0003DMT4000<br>45656 |       |     |    |                                                                                                                                              |
| 2917 | Homozygous<br>PS in RH | PGSC0003DMG40001<br>7801 | PGSC0003DMT4000<br>45890 |       |     |    |                                                                                                                                              |

|      |                        |                          |                          |
|------|------------------------|--------------------------|--------------------------|
| 2918 | Homozygous<br>PS in RH | PGSC0003DMG40001<br>7990 | PGSC0003DMT4000<br>46351 |
| 2919 | Homozygous<br>PS in RH | PGSC0003DMG40001<br>8163 | PGSC0003DMT4000<br>46778 |
| 2920 | Homozygous<br>PS in RH | PGSC0003DMG40001<br>8420 | PGSC0003DMT4000<br>47396 |
| 2921 | Homozygous<br>PS in RH | PGSC0003DMG40101<br>8597 | PGSC0003DMT4000<br>47844 |
| 2922 | Homozygous<br>PS in RH | PGSC0003DMG40001<br>8631 | PGSC0003DMT4000<br>47936 |
| 2923 | Homozygous<br>PS in RH | PGSC0003DMG40001<br>8665 | PGSC0003DMT4000<br>48037 |
| 2924 | Homozygous<br>PS in RH | PGSC0003DMG40201<br>8705 | PGSC0003DMT4000<br>48142 |
| 2925 | Homozygous<br>PS in RH | PGSC0003DMG40001<br>8820 | PGSC0003DMT4000<br>48455 |
| 2926 | Homozygous<br>PS in RH | PGSC0003DMG40001<br>8924 | PGSC0003DMT4000<br>48703 |
| 2927 | Homozygous<br>PS in RH | PGSC0003DMG40001<br>9170 | PGSC0003DMT4000<br>49324 |
| 2928 | Homozygous<br>PS in RH | PGSC0003DMG40001<br>9171 | PGSC0003DMT4000<br>49334 |
| 2929 | Homozygous<br>PS in RH | PGSC0003DMG40001<br>9384 | PGSC0003DMT4000<br>49882 |
| 2930 | Homozygous<br>PS in RH | PGSC0003DMG40001<br>9513 | PGSC0003DMT4000<br>50239 |
| 2931 | Homozygous<br>PS in RH | PGSC0003DMG40001<br>9517 | PGSC0003DMT4000<br>50249 |
| 2932 | Homozygous<br>PS in RH | PGSC0003DMG40001<br>9519 | PGSC0003DMT4000<br>50253 |
| 2933 | Homozygous<br>PS in RH | PGSC0003DMG40001<br>9525 | PGSC0003DMT4000<br>50265 |
| 2934 | Homozygous<br>PS in RH | PGSC0003DMG40001<br>9578 | PGSC0003DMT4000<br>50367 |
| 2935 | Homozygous<br>PS in RH | PGSC0003DMG40001<br>9818 | PGSC0003DMT4000<br>51038 |
| 2936 | Homozygous<br>PS in RH | PGSC0003DMG40201<br>9826 | PGSC0003DMT4000<br>51061 |

|      |                        |                          |                          |
|------|------------------------|--------------------------|--------------------------|
| 2937 | Homozygous<br>PS in RH | PGSC0003DMG40001<br>9943 | PGSC0003DMT4000<br>51347 |
| 2938 | Homozygous<br>PS in RH | PGSC0003DMG40002<br>0063 | PGSC0003DMT4000<br>51665 |
| 2939 | Homozygous<br>PS in RH | PGSC0003DMG40202<br>0091 | PGSC0003DMT4000<br>51759 |
| 2940 | Homozygous<br>PS in RH | PGSC0003DMG40002<br>0118 | PGSC0003DMT4000<br>51838 |
| 2941 | Homozygous<br>PS in RH | PGSC0003DMG40002<br>0168 | PGSC0003DMT4000<br>51962 |
| 2942 | Homozygous<br>PS in RH | PGSC0003DMG40002<br>0261 | PGSC0003DMT4000<br>52233 |
| 2943 | Homozygous<br>PS in RH | PGSC0003DMG40302<br>0339 | PGSC0003DMT4000<br>52398 |
| 2944 | Homozygous<br>PS in RH | PGSC0003DMG40002<br>0375 | PGSC0003DMT4000<br>52499 |
| 2945 | Homozygous<br>PS in RH | PGSC0003DMG40002<br>0665 | PGSC0003DMT4000<br>53242 |
| 2946 | Homozygous<br>PS in RH | PGSC0003DMG40002<br>0720 | PGSC0003DMT4000<br>53412 |
| 2947 | Homozygous<br>PS in RH | PGSC0003DMG40002<br>0804 | PGSC0003DMT4000<br>53627 |
| 2948 | Homozygous<br>PS in RH | PGSC0003DMG40002<br>0920 | PGSC0003DMT4000<br>53921 |
| 2949 | Homozygous<br>PS in RH | PGSC0003DMG40002<br>0941 | PGSC0003DMT4000<br>53974 |
| 2950 | Homozygous<br>PS in RH | PGSC0003DMG40002<br>1037 | PGSC0003DMT4000<br>54229 |
| 2951 | Homozygous<br>PS in RH | PGSC0003DMG40002<br>1105 | PGSC0003DMT4000<br>54379 |
| 2952 | Homozygous<br>PS in RH | PGSC0003DMG40002<br>1151 | PGSC0003DMT4000<br>54501 |
| 2953 | Homozygous<br>PS in RH | PGSC0003DMG40002<br>1224 | PGSC0003DMT4000<br>54681 |
| 2954 | Homozygous<br>PS in RH | PGSC0003DMG40002<br>1244 | PGSC0003DMT4000<br>54721 |
| 2955 | Homozygous<br>PS in RH | PGSC0003DMG40002<br>1284 | PGSC0003DMT4000<br>54830 |

|      |                        |                          |                          |
|------|------------------------|--------------------------|--------------------------|
| 2956 | Homozygous<br>PS in RH | PGSC0003DMG40002<br>1286 | PGSC0003DMT4000<br>54835 |
| 2957 | Homozygous<br>PS in RH | PGSC0003DMG40002<br>1319 | PGSC0003DMT4000<br>54936 |
| 2958 | Homozygous<br>PS in RH | PGSC0003DMG40002<br>1345 | PGSC0003DMT4000<br>55002 |
| 2959 | Homozygous<br>PS in RH | PGSC0003DMG40002<br>1371 | PGSC0003DMT4000<br>55076 |
| 2960 | Homozygous<br>PS in RH | PGSC0003DMG40002<br>1377 | PGSC0003DMT4000<br>55090 |
| 2961 | Homozygous<br>PS in RH | PGSC0003DMG40002<br>1541 | PGSC0003DMT4000<br>55477 |
| 2962 | Homozygous<br>PS in RH | PGSC0003DMG40002<br>1668 | PGSC0003DMT4000<br>55790 |
| 2963 | Homozygous<br>PS in RH | PGSC0003DMG40002<br>1755 | PGSC0003DMT4000<br>56008 |
| 2964 | Homozygous<br>PS in RH | PGSC0003DMG40002<br>1941 | PGSC0003DMT4000<br>56476 |
| 2965 | Homozygous<br>PS in RH | PGSC0003DMG40002<br>2158 | PGSC0003DMT4000<br>57001 |
| 2966 | Homozygous<br>PS in RH | PGSC0003DMG40202<br>2202 | PGSC0003DMT4000<br>57155 |
| 2967 | Homozygous<br>PS in RH | PGSC0003DMG40002<br>2217 | PGSC0003DMT4000<br>57197 |
| 2968 | Homozygous<br>PS in RH | PGSC0003DMG40002<br>2221 | PGSC0003DMT4000<br>57204 |
| 2969 | Homozygous<br>PS in RH | PGSC0003DMG40002<br>2234 | PGSC0003DMT4000<br>57239 |
| 2970 | Homozygous<br>PS in RH | PGSC0003DMG40002<br>2250 | PGSC0003DMT4000<br>57282 |
| 2971 | Homozygous<br>PS in RH | PGSC0003DMG40102<br>2274 | PGSC0003DMT4000<br>57370 |
| 2972 | Homozygous<br>PS in RH | PGSC0003DMG40002<br>2291 | PGSC0003DMT4000<br>57410 |
| 2973 | Homozygous<br>PS in RH | PGSC0003DMG40002<br>2347 | PGSC0003DMT4000<br>57534 |
| 2974 | Homozygous<br>PS in RH | PGSC0003DMG40002<br>2359 | PGSC0003DMT4000<br>57581 |



|      |                        |                          |                          |
|------|------------------------|--------------------------|--------------------------|
| 2975 | Homozygous<br>PS in RH | PGSC0003DMG40002<br>2379 | PGSC0003DMT4000<br>57633 |
| 2976 | Homozygous<br>PS in RH | PGSC0003DMG40002<br>2452 | PGSC0003DMT4000<br>57823 |
| 2977 | Homozygous<br>PS in RH | PGSC0003DMG40202<br>2603 | PGSC0003DMT4000<br>58215 |
| 2978 | Homozygous<br>PS in RH | PGSC0003DMG40002<br>2632 | PGSC0003DMT4000<br>58291 |
| 2979 | Homozygous<br>PS in RH | PGSC0003DMG40002<br>2639 | PGSC0003DMT4000<br>58304 |
| 2980 | Homozygous<br>PS in RH | PGSC0003DMG40202<br>2640 | PGSC0003DMT4000<br>58306 |
| 2981 | Homozygous<br>PS in RH | PGSC0003DMG40202<br>2737 | PGSC0003DMT4000<br>58533 |
| 2982 | Homozygous<br>PS in RH | PGSC0003DMG40002<br>2750 | PGSC0003DMT4000<br>58564 |
| 2983 | Homozygous<br>PS in RH | PGSC0003DMG40002<br>2845 | PGSC0003DMT4000<br>58793 |
| 2984 | Homozygous<br>PS in RH | PGSC0003DMG40002<br>2948 | PGSC0003DMT4000<br>59079 |
| 2985 | Homozygous<br>PS in RH | PGSC0003DMG40002<br>2958 | PGSC0003DMT4000<br>59106 |
| 2986 | Homozygous<br>PS in RH | PGSC0003DMG40002<br>2981 | PGSC0003DMT4000<br>59166 |
| 2987 | Homozygous<br>PS in RH | PGSC0003DMG40002<br>3008 | PGSC0003DMT4000<br>59227 |
| 2988 | Homozygous<br>PS in RH | PGSC0003DMG40002<br>3119 | PGSC0003DMT4000<br>59511 |
| 2989 | Homozygous<br>PS in RH | PGSC0003DMG40202<br>3186 | PGSC0003DMT4000<br>59655 |
| 2990 | Homozygous<br>PS in RH | PGSC0003DMG40002<br>3207 | PGSC0003DMT4000<br>59697 |
| 2991 | Homozygous<br>PS in RH | PGSC0003DMG40002<br>3209 | PGSC0003DMT4000<br>59699 |
| 2992 | Homozygous<br>PS in RH | PGSC0003DMG40002<br>3404 | PGSC0003DMT4000<br>60165 |
| 2993 | Homozygous<br>PS in RH | PGSC0003DMG40002<br>3529 | PGSC0003DMT4000<br>60486 |

|      |                        |                          |                          |
|------|------------------------|--------------------------|--------------------------|
| 2994 | Homozygous<br>PS in RH | PGSC0003DMG40002<br>3551 | PGSC0003DMT4000<br>60532 |
| 2995 | Homozygous<br>PS in RH | PGSC0003DMG40002<br>3662 | PGSC0003DMT4000<br>60832 |
| 2996 | Homozygous<br>PS in RH | PGSC0003DMG40002<br>3712 | PGSC0003DMT4000<br>60959 |
| 2997 | Homozygous<br>PS in RH | PGSC0003DMG40002<br>3997 | PGSC0003DMT4000<br>61646 |
| 2998 | Homozygous<br>PS in RH | PGSC0003DMG40202<br>4031 | PGSC0003DMT4000<br>61749 |
| 2999 | Homozygous<br>PS in RH | PGSC0003DMG40002<br>4061 | PGSC0003DMT4000<br>61842 |
| 3000 | Homozygous<br>PS in RH | PGSC0003DMG40002<br>4075 | PGSC0003DMT4000<br>61875 |
| 3001 | Homozygous<br>PS in RH | PGSC0003DMG40002<br>4152 | PGSC0003DMT4000<br>62064 |
| 3002 | Homozygous<br>PS in RH | PGSC0003DMG40002<br>4362 | PGSC0003DMT4000<br>62607 |
| 3003 | Homozygous<br>PS in RH | PGSC0003DMG40002<br>4524 | PGSC0003DMT4000<br>63032 |
| 3004 | Homozygous<br>PS in RH | PGSC0003DMG40202<br>4548 | PGSC0003DMT4000<br>63107 |
| 3005 | Homozygous<br>PS in RH | PGSC0003DMG40002<br>4560 | PGSC0003DMT4000<br>63143 |
| 3006 | Homozygous<br>PS in RH | PGSC0003DMG40002<br>4644 | PGSC0003DMT4000<br>63352 |
| 3007 | Homozygous<br>PS in RH | PGSC0003DMG40002<br>4759 | PGSC0003DMT4000<br>63701 |
| 3008 | Homozygous<br>PS in RH | PGSC0003DMG40002<br>4952 | PGSC0003DMT4000<br>64226 |
| 3009 | Homozygous<br>PS in RH | PGSC0003DMG40002<br>4978 | PGSC0003DMT4000<br>64290 |
| 3010 | Homozygous<br>PS in RH | PGSC0003DMG40002<br>5024 | PGSC0003DMT4000<br>64406 |
| 3011 | Homozygous<br>PS in RH | PGSC0003DMG40002<br>5069 | PGSC0003DMT4000<br>64516 |
| 3012 | Homozygous<br>PS in RH | PGSC0003DMG40002<br>5112 | PGSC0003DMT4000<br>64634 |

|      |                        |                          |                          |
|------|------------------------|--------------------------|--------------------------|
| 3013 | Homozygous<br>PS in RH | PGSC0003DMG40002<br>5198 | PGSC0003DMT4000<br>64888 |
| 3014 | Homozygous<br>PS in RH | PGSC0003DMG40002<br>5267 | PGSC0003DMT4000<br>65035 |
| 3015 | Homozygous<br>PS in RH | PGSC0003DMG40002<br>5339 | PGSC0003DMT4000<br>65200 |
| 3016 | Homozygous<br>PS in RH | PGSC0003DMG40002<br>5361 | PGSC0003DMT4000<br>65251 |
| 3017 | Homozygous<br>PS in RH | PGSC0003DMG40002<br>5409 | PGSC0003DMT4000<br>65369 |
| 3018 | Homozygous<br>PS in RH | PGSC0003DMG40002<br>5560 | PGSC0003DMT4000<br>65698 |
| 3019 | Homozygous<br>PS in RH | PGSC0003DMG40002<br>5584 | PGSC0003DMT4000<br>65736 |
| 3020 | Homozygous<br>PS in RH | PGSC0003DMG40002<br>5606 | PGSC0003DMT4000<br>65778 |
| 3021 | Homozygous<br>PS in RH | PGSC0003DMG40002<br>5633 | PGSC0003DMT4000<br>65852 |
| 3022 | Homozygous<br>PS in RH | PGSC0003DMG40002<br>5670 | PGSC0003DMT4000<br>65948 |
| 3023 | Homozygous<br>PS in RH | PGSC0003DMG40002<br>5701 | PGSC0003DMT4000<br>66027 |
| 3024 | Homozygous<br>PS in RH | PGSC0003DMG40002<br>5748 | PGSC0003DMT4000<br>66158 |
| 3025 | Homozygous<br>PS in RH | PGSC0003DMG40202<br>5785 | PGSC0003DMT4000<br>66275 |
| 3026 | Homozygous<br>PS in RH | PGSC0003DMG40002<br>5803 | PGSC0003DMT4000<br>66354 |
| 3027 | Homozygous<br>PS in RH | PGSC0003DMG40002<br>5842 | PGSC0003DMT4000<br>66505 |
| 3028 | Homozygous<br>PS in RH | PGSC0003DMG40202<br>5898 | PGSC0003DMT4000<br>66624 |
| 3029 | Homozygous<br>PS in RH | PGSC0003DMG40102<br>5908 | PGSC0003DMT4000<br>66676 |
| 3030 | Homozygous<br>PS in RH | PGSC0003DMG40002<br>5940 | PGSC0003DMT4000<br>66745 |
| 3031 | Homozygous<br>PS in RH | PGSC0003DMG40002<br>6167 | PGSC0003DMT4000<br>67292 |

|      |                        |                          |                          |
|------|------------------------|--------------------------|--------------------------|
| 3032 | Homozygous<br>PS in RH | PGSC0003DMG40002<br>6233 | PGSC0003DMT4000<br>67474 |
| 3033 | Homozygous<br>PS in RH | PGSC0003DMG40102<br>6624 | PGSC0003DMT4000<br>68472 |
| 3034 | Homozygous<br>PS in RH | PGSC0003DMG40002<br>6777 | PGSC0003DMT4000<br>68844 |
| 3035 | Homozygous<br>PS in RH | PGSC0003DMG40002<br>6847 | PGSC0003DMT4000<br>69023 |
| 3036 | Homozygous<br>PS in RH | PGSC0003DMG40002<br>6853 | PGSC0003DMT4000<br>69030 |
| 3037 | Homozygous<br>PS in RH | PGSC0003DMG40002<br>6988 | PGSC0003DMT4000<br>69411 |
| 3038 | Homozygous<br>PS in RH | PGSC0003DMG40002<br>6990 | PGSC0003DMT4000<br>69420 |
| 3039 | Homozygous<br>PS in RH | PGSC0003DMG40102<br>7084 | PGSC0003DMT4000<br>69666 |
| 3040 | Homozygous<br>PS in RH | PGSC0003DMG40202<br>7248 | PGSC0003DMT4000<br>70080 |
| 3041 | Homozygous<br>PS in RH | PGSC0003DMG40002<br>7303 | PGSC0003DMT4000<br>70232 |
| 3042 | Homozygous<br>PS in RH | PGSC0003DMG40202<br>7320 | PGSC0003DMT4000<br>70260 |
| 3043 | Homozygous<br>PS in RH | PGSC0003DMG40102<br>7350 | PGSC0003DMT4000<br>70340 |
| 3044 | Homozygous<br>PS in RH | PGSC0003DMG40002<br>7378 | PGSC0003DMT4000<br>70424 |
| 3045 | Homozygous<br>PS in RH | PGSC0003DMG40002<br>7453 | PGSC0003DMT4000<br>70621 |
| 3046 | Homozygous<br>PS in RH | PGSC0003DMG40002<br>7482 | PGSC0003DMT4000<br>70694 |
| 3047 | Homozygous<br>PS in RH | PGSC0003DMG40002<br>7674 | PGSC0003DMT4000<br>71160 |
| 3048 | Homozygous<br>PS in RH | PGSC0003DMG40202<br>7812 | PGSC0003DMT4000<br>71490 |
| 3049 | Homozygous<br>PS in RH | PGSC0003DMG40102<br>7896 | PGSC0003DMT4000<br>71707 |
| 3050 | Homozygous<br>PS in RH | PGSC0003DMG40002<br>7919 | PGSC0003DMT4000<br>71776 |

|      |                        |                          |                          |
|------|------------------------|--------------------------|--------------------------|
| 3051 | Homozygous<br>PS in RH | PGSC0003DMG40002<br>7962 | PGSC0003DMT4000<br>71865 |
| 3052 | Homozygous<br>PS in RH | PGSC0003DMG40002<br>8108 | PGSC0003DMT4000<br>72226 |
| 3053 | Homozygous<br>PS in RH | PGSC0003DMG40002<br>8255 | PGSC0003DMT4000<br>72619 |
| 3054 | Homozygous<br>PS in RH | PGSC0003DMG40002<br>8277 | PGSC0003DMT4000<br>72666 |
| 3055 | Homozygous<br>PS in RH | PGSC0003DMG40002<br>8492 | PGSC0003DMT4000<br>73318 |
| 3056 | Homozygous<br>PS in RH | PGSC0003DMG40302<br>8522 | PGSC0003DMT4000<br>73404 |
| 3057 | Homozygous<br>PS in RH | PGSC0003DMG40002<br>8525 | PGSC0003DMT4000<br>73432 |
| 3058 | Homozygous<br>PS in RH | PGSC0003DMG40102<br>8529 | PGSC0003DMT4000<br>73438 |
| 3059 | Homozygous<br>PS in RH | PGSC0003DMG40002<br>8567 | PGSC0003DMT4000<br>73537 |
| 3060 | Homozygous<br>PS in RH | PGSC0003DMG40002<br>8662 | PGSC0003DMT4000<br>73779 |
| 3061 | Homozygous<br>PS in RH | PGSC0003DMG40002<br>8679 | PGSC0003DMT4000<br>73812 |
| 3062 | Homozygous<br>PS in RH | PGSC0003DMG40002<br>8688 | PGSC0003DMT4000<br>73837 |
| 3063 | Homozygous<br>PS in RH | PGSC0003DMG40002<br>8698 | PGSC0003DMT4000<br>73851 |
| 3064 | Homozygous<br>PS in RH | PGSC0003DMG40202<br>8788 | PGSC0003DMT4000<br>74077 |
| 3065 | Homozygous<br>PS in RH | PGSC0003DMG40002<br>9033 | PGSC0003DMT4000<br>74671 |
| 3066 | Homozygous<br>PS in RH | PGSC0003DMG40002<br>9086 | PGSC0003DMT4000<br>74806 |
| 3067 | Homozygous<br>PS in RH | PGSC0003DMG40002<br>9156 | PGSC0003DMT4000<br>74958 |
| 3068 | Homozygous<br>PS in RH | PGSC0003DMG40102<br>9267 | PGSC0003DMT4000<br>75243 |
| 3069 | Homozygous<br>PS in RH | PGSC0003DMG40002<br>9276 | PGSC0003DMT4000<br>75273 |

|      |                        |                          |                          |
|------|------------------------|--------------------------|--------------------------|
| 3070 | Homozygous<br>PS in RH | PGSC0003DMG40002<br>9287 | PGSC0003DMT4000<br>75309 |
| 3071 | Homozygous<br>PS in RH | PGSC0003DMG40002<br>9376 | PGSC0003DMT4000<br>75540 |
| 3072 | Homozygous<br>PS in RH | PGSC0003DMG40002<br>9574 | PGSC0003DMT4000<br>76052 |
| 3073 | Homozygous<br>PS in RH | PGSC0003DMG40002<br>9636 | PGSC0003DMT4000<br>76234 |
| 3074 | Homozygous<br>PS in RH | PGSC0003DMG40002<br>9753 | PGSC0003DMT4000<br>76528 |
| 3075 | Homozygous<br>PS in RH | PGSC0003DMG40002<br>9902 | PGSC0003DMT4000<br>76874 |
| 3076 | Homozygous<br>PS in RH | PGSC0003DMG40003<br>0150 | PGSC0003DMT4000<br>77533 |
| 3077 | Homozygous<br>PS in RH | PGSC0003DMG40003<br>0383 | PGSC0003DMT4000<br>78124 |
| 3078 | Homozygous<br>PS in RH | PGSC0003DMG40003<br>0390 | PGSC0003DMT4000<br>78138 |
| 3079 | Homozygous<br>PS in RH | PGSC0003DMG40003<br>0441 | PGSC0003DMT4000<br>78227 |
| 3080 | Homozygous<br>PS in RH | PGSC0003DMG40003<br>0490 | PGSC0003DMT4000<br>78318 |
| 3081 | Homozygous<br>PS in RH | PGSC0003DMG40103<br>0531 | PGSC0003DMT4000<br>78426 |
| 3082 | Homozygous<br>PS in RH | PGSC0003DMG40203<br>0532 | PGSC0003DMT4000<br>78437 |
| 3083 | Homozygous<br>PS in RH | PGSC0003DMG40003<br>0554 | PGSC0003DMT4000<br>78490 |
| 3084 | Homozygous<br>PS in RH | PGSC0003DMG40003<br>0759 | PGSC0003DMT4000<br>79021 |
| 3085 | Homozygous<br>PS in RH | PGSC0003DMG40003<br>0780 | PGSC0003DMT4000<br>79091 |
| 3086 | Homozygous<br>PS in RH | PGSC0003DMG40003<br>0835 | PGSC0003DMT4000<br>79224 |
| 3087 | Homozygous<br>PS in RH | PGSC0003DMG40003<br>0893 | PGSC0003DMT4000<br>79360 |
| 3088 | Homozygous<br>PS in RH | PGSC0003DMG40003<br>0962 | PGSC0003DMT4000<br>79518 |

|      |                        |                          |                          |
|------|------------------------|--------------------------|--------------------------|
| 3089 | Homozygous<br>PS in RH | PGSC0003DMG40003<br>0987 | PGSC0003DMT4000<br>79576 |
| 3090 | Homozygous<br>PS in RH | PGSC0003DMG40003<br>0993 | PGSC0003DMT4000<br>79598 |
| 3091 | Homozygous<br>PS in RH | PGSC0003DMG40003<br>1102 | PGSC0003DMT4000<br>79862 |
| 3092 | Homozygous<br>PS in RH | PGSC0003DMG40003<br>1140 | PGSC0003DMT4000<br>79980 |
| 3093 | Homozygous<br>PS in RH | PGSC0003DMG40003<br>1152 | PGSC0003DMT4000<br>80004 |
| 3094 | Homozygous<br>PS in RH | PGSC0003DMG40003<br>1154 | PGSC0003DMT4000<br>80013 |
| 3095 | Homozygous<br>PS in RH | PGSC0003DMG40003<br>1281 | PGSC0003DMT4000<br>80339 |
| 3096 | Homozygous<br>PS in RH | PGSC0003DMG40003<br>1818 | PGSC0003DMT4000<br>81395 |
| 3097 | Homozygous<br>PS in RH | PGSC0003DMG40003<br>2103 | PGSC0003DMT4000<br>81750 |
| 3098 | Homozygous<br>PS in RH | PGSC0003DMG40003<br>2162 | PGSC0003DMT4000<br>81934 |
| 3099 | Homozygous<br>PS in RH | PGSC0003DMG40003<br>2784 | PGSC0003DMT4000<br>82725 |
| 3100 | Homozygous<br>PS in RH | PGSC0003DMG40003<br>2786 | PGSC0003DMT4000<br>82729 |
| 3101 | Homozygous<br>PS in RH | PGSC0003DMG40003<br>3067 | PGSC0003DMT4000<br>83129 |
| 3102 | Homozygous<br>PS in RH | PGSC0003DMG40003<br>3085 | PGSC0003DMT4000<br>83161 |
| 3103 | Homozygous<br>PS in RH | PGSC0003DMG40203<br>3165 | PGSC0003DMT4000<br>83286 |
| 3104 | Homozygous<br>PS in RH | PGSC0003DMG40003<br>3584 | PGSC0003DMT4000<br>83786 |
| 3105 | Homozygous<br>PS in RH | PGSC0003DMG40003<br>3673 | PGSC0003DMT4000<br>83948 |
| 3106 | Homozygous<br>PS in RH | PGSC0003DMG40003<br>3682 | PGSC0003DMT4000<br>83961 |
| 3107 | Homozygous<br>PS in RH | PGSC0003DMG40003<br>3694 | PGSC0003DMT4000<br>83993 |

|      |                        |                          |                          |
|------|------------------------|--------------------------|--------------------------|
| 3108 | Homozygous<br>PS in RH | PGSC0003DMG40003<br>3878 | PGSC0003DMT4000<br>84209 |
| 3109 | Homozygous<br>PS in RH | PGSC0003DMG40003<br>3884 | PGSC0003DMT4000<br>84227 |
| 3110 | Homozygous<br>PS in RH | PGSC0003DMG40003<br>4401 | PGSC0003DMT4000<br>84830 |
| 3111 | Homozygous<br>PS in RH | PGSC0003DMG40003<br>4476 | PGSC0003DMT4000<br>84905 |
| 3112 | Homozygous<br>PS in RH | PGSC0003DMG40003<br>4552 | PGSC0003DMT4000<br>84981 |
| 3113 | Homozygous<br>PS in RH | PGSC0003DMG40003<br>4577 | PGSC0003DMT4000<br>85006 |
| 3114 | Homozygous<br>PS in RH | PGSC0003DMG40003<br>4667 | PGSC0003DMT4000<br>85096 |
| 3115 | Homozygous<br>PS in RH | PGSC0003DMG40003<br>4675 | PGSC0003DMT4000<br>85104 |
| 3116 | Homozygous<br>PS in RH | PGSC0003DMG40003<br>4717 | PGSC0003DMT4000<br>85146 |
| 3117 | Homozygous<br>PS in RH | PGSC0003DMG40003<br>4730 | PGSC0003DMT4000<br>85159 |
| 3118 | Homozygous<br>PS in RH | PGSC0003DMG40003<br>4880 | PGSC0003DMT4000<br>85309 |
| 3119 | Homozygous<br>PS in RH | PGSC0003DMG40003<br>4941 | PGSC0003DMT4000<br>85370 |
| 3120 | Homozygous<br>PS in RH | PGSC0003DMG40003<br>5013 | PGSC0003DMT4000<br>85442 |
| 3121 | Homozygous<br>PS in RH | PGSC0003DMG40003<br>5085 | PGSC0003DMT4000<br>85514 |
| 3122 | Homozygous<br>PS in RH | PGSC0003DMG40003<br>5095 | PGSC0003DMT4000<br>85524 |
| 3123 | Homozygous<br>PS in RH | PGSC0003DMG40003<br>5096 | PGSC0003DMT4000<br>85525 |
| 3124 | Homozygous<br>PS in RH | PGSC0003DMG40003<br>5097 | PGSC0003DMT4000<br>85526 |
| 3125 | Homozygous<br>PS in RH | PGSC0003DMG40003<br>5125 | PGSC0003DMT4000<br>85554 |
| 3126 | Homozygous<br>PS in RH | PGSC0003DMG40003<br>5363 | PGSC0003DMT4000<br>85792 |



|      |                        |                          |                          |
|------|------------------------|--------------------------|--------------------------|
| 3127 | Homozygous<br>PS in RH | PGSC0003DMG40003<br>5395 | PGSC0003DMT4000<br>85824 |
| 3128 | Homozygous<br>PS in RH | PGSC0003DMG40003<br>5437 | PGSC0003DMT4000<br>85866 |
| 3129 | Homozygous<br>PS in RH | PGSC0003DMG40003<br>5694 | PGSC0003DMT4000<br>86123 |
| 3130 | Homozygous<br>PS in RH | PGSC0003DMG40003<br>5747 | PGSC0003DMT4000<br>86176 |
| 3131 | Homozygous<br>PS in RH | PGSC0003DMG40003<br>5760 | PGSC0003DMT4000<br>86189 |
| 3132 | Homozygous<br>PS in RH | PGSC0003DMG40003<br>5877 | PGSC0003DMT4000<br>86306 |
| 3133 | Homozygous<br>PS in RH | PGSC0003DMG40003<br>5949 | PGSC0003DMT4000<br>86378 |
| 3134 | Homozygous<br>PS in RH | PGSC0003DMG40003<br>5952 | PGSC0003DMT4000<br>86381 |
| 3135 | Homozygous<br>PS in RH | PGSC0003DMG40003<br>6001 | PGSC0003DMT4000<br>86430 |
| 3136 | Homozygous<br>PS in RH | PGSC0003DMG40003<br>6032 | PGSC0003DMT4000<br>86461 |
| 3137 | Homozygous<br>PS in RH | PGSC0003DMG40003<br>6077 | PGSC0003DMT4000<br>86506 |
| 3138 | Homozygous<br>PS in RH | PGSC0003DMG40003<br>6079 | PGSC0003DMT4000<br>86508 |
| 3139 | Homozygous<br>PS in RH | PGSC0003DMG40003<br>6153 | PGSC0003DMT4000<br>86582 |
| 3140 | Homozygous<br>PS in RH | PGSC0003DMG40003<br>6207 | PGSC0003DMT4000<br>86636 |
| 3141 | Homozygous<br>PS in RH | PGSC0003DMG40003<br>6263 | PGSC0003DMT4000<br>86692 |
| 3142 | Homozygous<br>PS in RH | PGSC0003DMG40003<br>6393 | PGSC0003DMT4000<br>86822 |
| 3143 | Homozygous<br>PS in RH | PGSC0003DMG40003<br>6442 | PGSC0003DMT4000<br>86871 |
| 3144 | Homozygous<br>PS in RH | PGSC0003DMG40003<br>6502 | PGSC0003DMT4000<br>86931 |
| 3145 | Homozygous<br>PS in RH | PGSC0003DMG40003<br>6534 | PGSC0003DMT4000<br>86963 |

|      |                        |                          |                          |
|------|------------------------|--------------------------|--------------------------|
| 3146 | Homozygous<br>PS in RH | PGSC0003DMG40003<br>6540 | PGSC0003DMT4000<br>86969 |
| 3147 | Homozygous<br>PS in RH | PGSC0003DMG40003<br>6543 | PGSC0003DMT4000<br>86972 |
| 3148 | Homozygous<br>PS in RH | PGSC0003DMG40003<br>6866 | PGSC0003DMT4000<br>87295 |
| 3149 | Homozygous<br>PS in RH | PGSC0003DMG40003<br>6893 | PGSC0003DMT4000<br>87322 |
| 3150 | Homozygous<br>PS in RH | PGSC0003DMG40003<br>6929 | PGSC0003DMT4000<br>87358 |
| 3151 | Homozygous<br>PS in RH | PGSC0003DMG40003<br>6951 | PGSC0003DMT4000<br>87380 |
| 3152 | Homozygous<br>PS in RH | PGSC0003DMG40003<br>6982 | PGSC0003DMT4000<br>87411 |
| 3153 | Homozygous<br>PS in RH | PGSC0003DMG40003<br>7146 | PGSC0003DMT4000<br>87575 |
| 3154 | Homozygous<br>PS in RH | PGSC0003DMG40003<br>7250 | PGSC0003DMT4000<br>87679 |
| 3155 | Homozygous<br>PS in RH | PGSC0003DMG40003<br>7282 | PGSC0003DMT4000<br>87711 |
| 3156 | Homozygous<br>PS in RH | PGSC0003DMG40003<br>7357 | PGSC0003DMT4000<br>87786 |
| 3157 | Homozygous<br>PS in RH | PGSC0003DMG40003<br>7372 | PGSC0003DMT4000<br>87801 |
| 3158 | Homozygous<br>PS in RH | PGSC0003DMG40003<br>7492 | PGSC0003DMT4000<br>87921 |
| 3159 | Homozygous<br>PS in RH | PGSC0003DMG40003<br>7637 | PGSC0003DMT4000<br>88066 |
| 3160 | Homozygous<br>PS in RH | PGSC0003DMG40003<br>7664 | PGSC0003DMT4000<br>88093 |
| 3161 | Homozygous<br>PS in RH | PGSC0003DMG40003<br>7689 | PGSC0003DMT4000<br>88118 |
| 3162 | Homozygous<br>PS in RH | PGSC0003DMG40003<br>7704 | PGSC0003DMT4000<br>88133 |
| 3163 | Homozygous<br>PS in RH | PGSC0003DMG40003<br>7728 | PGSC0003DMT4000<br>88157 |
| 3164 | Homozygous<br>PS in RH | PGSC0003DMG40003<br>7847 | PGSC0003DMT4000<br>88276 |

|      |                        |                          |                          |
|------|------------------------|--------------------------|--------------------------|
| 3165 | Homozygous<br>PS in RH | PGSC0003DMG40003<br>7928 | PGSC0003DMT4000<br>88357 |
| 3166 | Homozygous<br>PS in RH | PGSC0003DMG40003<br>7946 | PGSC0003DMT4000<br>88375 |
| 3167 | Homozygous<br>PS in RH | PGSC0003DMG40003<br>8055 | PGSC0003DMT4000<br>88484 |
| 3168 | Homozygous<br>PS in RH | PGSC0003DMG40003<br>8066 | PGSC0003DMT4000<br>88495 |
| 3169 | Homozygous<br>PS in RH | PGSC0003DMG40003<br>8082 | PGSC0003DMT4000<br>88511 |
| 3170 | Homozygous<br>PS in RH | PGSC0003DMG40003<br>8119 | PGSC0003DMT4000<br>88548 |
| 3171 | Homozygous<br>PS in RH | PGSC0003DMG40003<br>8217 | PGSC0003DMT4000<br>88646 |
| 3172 | Homozygous<br>PS in RH | PGSC0003DMG40003<br>8223 | PGSC0003DMT4000<br>88652 |
| 3173 | Homozygous<br>PS in RH | PGSC0003DMG40003<br>8271 | PGSC0003DMT4000<br>88700 |
| 3174 | Homozygous<br>PS in RH | PGSC0003DMG40003<br>8425 | PGSC0003DMT4000<br>88854 |
| 3175 | Homozygous<br>PS in RH | PGSC0003DMG40003<br>8439 | PGSC0003DMT4000<br>88868 |
| 3176 | Homozygous<br>PS in RH | PGSC0003DMG40003<br>8654 | PGSC0003DMT4000<br>89083 |
| 3177 | Homozygous<br>PS in RH | PGSC0003DMG40003<br>8662 | PGSC0003DMT4000<br>89091 |
| 3178 | Homozygous<br>PS in RH | PGSC0003DMG40003<br>8757 | PGSC0003DMT4000<br>89186 |
| 3179 | Homozygous<br>PS in RH | PGSC0003DMG40003<br>8802 | PGSC0003DMT4000<br>89231 |
| 3180 | Homozygous<br>PS in RH | PGSC0003DMG40003<br>8833 | PGSC0003DMT4000<br>89262 |
| 3181 | Homozygous<br>PS in RH | PGSC0003DMG40003<br>8848 | PGSC0003DMT4000<br>89277 |
| 3182 | Homozygous<br>PS in RH | PGSC0003DMG40003<br>8891 | PGSC0003DMT4000<br>89320 |
| 3183 | Homozygous<br>PS in RH | PGSC0003DMG40003<br>8893 | PGSC0003DMT4000<br>89322 |

|      |                        |                          |                          |
|------|------------------------|--------------------------|--------------------------|
| 3184 | Homozygous<br>PS in RH | PGSC0003DMG40003<br>8897 | PGSC0003DMT4000<br>89326 |
| 3185 | Homozygous<br>PS in RH | PGSC0003DMG40003<br>8977 | PGSC0003DMT4000<br>89406 |
| 3186 | Homozygous<br>PS in RH | PGSC0003DMG40003<br>8978 | PGSC0003DMT4000<br>89407 |
| 3187 | Homozygous<br>PS in RH | PGSC0003DMG40003<br>8993 | PGSC0003DMT4000<br>89422 |
| 3188 | Homozygous<br>PS in RH | PGSC0003DMG40003<br>9011 | PGSC0003DMT4000<br>89440 |
| 3189 | Homozygous<br>PS in RH | PGSC0003DMG40003<br>9083 | PGSC0003DMT4000<br>89512 |
| 3190 | Homozygous<br>PS in RH | PGSC0003DMG40003<br>9118 | PGSC0003DMT4000<br>89547 |
| 3191 | Homozygous<br>PS in RH | PGSC0003DMG40003<br>9479 | PGSC0003DMT4000<br>89908 |
| 3192 | Homozygous<br>PS in RH | PGSC0003DMG40003<br>9580 | PGSC0003DMT4000<br>90009 |
| 3193 | Homozygous<br>PS in RH | PGSC0003DMG40003<br>9676 | PGSC0003DMT4000<br>90105 |
| 3194 | Homozygous<br>PS in RH | PGSC0003DMG40003<br>9714 | PGSC0003DMT4000<br>90143 |
| 3195 | Homozygous<br>PS in RH | PGSC0003DMG40003<br>9739 | PGSC0003DMT4000<br>90168 |
| 3196 | Homozygous<br>PS in RH | PGSC0003DMG40003<br>9768 | PGSC0003DMT4000<br>90197 |
| 3197 | Homozygous<br>PS in RH | PGSC0003DMG40003<br>9778 | PGSC0003DMT4000<br>90207 |
| 3198 | Homozygous<br>PS in RH | PGSC0003DMG40003<br>9856 | PGSC0003DMT4000<br>90285 |
| 3199 | Homozygous<br>PS in RH | PGSC0003DMG40003<br>9867 | PGSC0003DMT4000<br>90296 |
| 3200 | Homozygous<br>PS in RH | PGSC0003DMG40003<br>9949 | PGSC0003DMT4000<br>90378 |
| 3201 | Homozygous<br>PS in RH | PGSC0003DMG40004<br>0010 | PGSC0003DMT4000<br>90439 |
| 3202 | Homozygous<br>PS in RH | PGSC0003DMG40004<br>0099 | PGSC0003DMT4000<br>90528 |

|      |                        |                          |                          |
|------|------------------------|--------------------------|--------------------------|
| 3203 | Homozygous<br>PS in RH | PGSC0003DMG40004<br>0148 | PGSC0003DMT4000<br>90577 |
| 3204 | Homozygous<br>PS in RH | PGSC0003DMG40004<br>0214 | PGSC0003DMT4000<br>90643 |
| 3205 | Homozygous<br>PS in RH | PGSC0003DMG40004<br>0326 | PGSC0003DMT4000<br>90755 |
| 3206 | Homozygous<br>PS in RH | PGSC0003DMG40004<br>0440 | PGSC0003DMT4000<br>90869 |
| 3207 | Homozygous<br>PS in RH | PGSC0003DMG40004<br>0455 | PGSC0003DMT4000<br>90884 |
| 3208 | Homozygous<br>PS in RH | PGSC0003DMG40004<br>0595 | PGSC0003DMT4000<br>91024 |
| 3209 | Homozygous<br>PS in RH | PGSC0003DMG40004<br>0618 | PGSC0003DMT4000<br>91047 |
| 3210 | Homozygous<br>PS in RH | PGSC0003DMG40004<br>0643 | PGSC0003DMT4000<br>91072 |
| 3211 | Homozygous<br>PS in RH | PGSC0003DMG40004<br>0694 | PGSC0003DMT4000<br>91123 |
| 3212 | Homozygous<br>PS in RH | PGSC0003DMG40004<br>0758 | PGSC0003DMT4000<br>91187 |
| 3213 | Homozygous<br>PS in RH | PGSC0003DMG40004<br>0959 | PGSC0003DMT4000<br>91388 |
| 3214 | Homozygous<br>PS in RH | PGSC0003DMG40004<br>1363 | PGSC0003DMT4000<br>91792 |
| 3215 | Homozygous<br>PS in RH | PGSC0003DMG40004<br>1432 | PGSC0003DMT4000<br>91861 |
| 3216 | Homozygous<br>PS in RH | PGSC0003DMG40004<br>1518 | PGSC0003DMT4000<br>91947 |
| 3217 | Homozygous<br>PS in RH | PGSC0003DMG40004<br>1558 | PGSC0003DMT4000<br>91987 |
| 3218 | Homozygous<br>PS in RH | PGSC0003DMG40004<br>1617 | PGSC0003DMT4000<br>92046 |
| 3219 | Homozygous<br>PS in RH | PGSC0003DMG40004<br>1659 | PGSC0003DMT4000<br>92088 |
| 3220 | Homozygous<br>PS in RH | PGSC0003DMG40004<br>1726 | PGSC0003DMT4000<br>92155 |
| 3221 | Homozygous<br>PS in RH | PGSC0003DMG40004<br>1746 | PGSC0003DMT4000<br>92175 |

|      |                        |                          |                          |
|------|------------------------|--------------------------|--------------------------|
| 3222 | Homozygous<br>PS in RH | PGSC0003DMG40004<br>1819 | PGSC0003DMT4000<br>92248 |
| 3223 | Homozygous<br>PS in RH | PGSC0003DMG40004<br>1954 | PGSC0003DMT4000<br>92383 |
| 3224 | Homozygous<br>PS in RH | PGSC0003DMG40004<br>1999 | PGSC0003DMT4000<br>92428 |
| 3225 | Homozygous<br>PS in RH | PGSC0003DMG40004<br>2012 | PGSC0003DMT4000<br>92441 |
| 3226 | Homozygous<br>PS in RH | PGSC0003DMG40004<br>2161 | PGSC0003DMT4000<br>92590 |
| 3227 | Homozygous<br>PS in RH | PGSC0003DMG40004<br>2187 | PGSC0003DMT4000<br>92616 |
| 3228 | Homozygous<br>PS in RH | PGSC0003DMG40004<br>2259 | PGSC0003DMT4000<br>92688 |
| 3229 | Homozygous<br>PS in RH | PGSC0003DMG40004<br>2265 | PGSC0003DMT4000<br>92694 |
| 3230 | Homozygous<br>PS in RH | PGSC0003DMG40004<br>2311 | PGSC0003DMT4000<br>92740 |
| 3231 | Homozygous<br>PS in RH | PGSC0003DMG40004<br>2330 | PGSC0003DMT4000<br>92759 |
| 3232 | Homozygous<br>PS in RH | PGSC0003DMG40004<br>2471 | PGSC0003DMT4000<br>92900 |
| 3233 | Homozygous<br>PS in RH | PGSC0003DMG40004<br>2476 | PGSC0003DMT4000<br>92905 |
| 3234 | Homozygous<br>PS in RH | PGSC0003DMG40004<br>2485 | PGSC0003DMT4000<br>92914 |
| 3235 | Homozygous<br>PS in RH | PGSC0003DMG40004<br>2505 | PGSC0003DMT4000<br>92934 |
| 3236 | Homozygous<br>PS in RH | PGSC0003DMG40004<br>2586 | PGSC0003DMT4000<br>93015 |
| 3237 | Homozygous<br>PS in RH | PGSC0003DMG40004<br>2613 | PGSC0003DMT4000<br>93042 |
| 3238 | Homozygous<br>PS in RH | PGSC0003DMG40004<br>2663 | PGSC0003DMT4000<br>93092 |
| 3239 | Homozygous<br>PS in RH | PGSC0003DMG40004<br>2672 | PGSC0003DMT4000<br>93101 |
| 3240 | Homozygous<br>PS in RH | PGSC0003DMG40004<br>2899 | PGSC0003DMT4000<br>93328 |

|      |                        |                          |                          |
|------|------------------------|--------------------------|--------------------------|
| 3241 | Homozygous<br>PS in RH | PGSC0003DMG40004<br>3072 | PGSC0003DMT4000<br>93501 |
| 3242 | Homozygous<br>PS in RH | PGSC0003DMG40004<br>3218 | PGSC0003DMT4000<br>93647 |
| 3243 | Homozygous<br>PS in RH | PGSC0003DMG40004<br>3275 | PGSC0003DMT4000<br>93704 |
| 3244 | Homozygous<br>PS in RH | PGSC0003DMG40004<br>3396 | PGSC0003DMT4000<br>93825 |
| 3245 | Homozygous<br>PS in RH | PGSC0003DMG40004<br>3411 | PGSC0003DMT4000<br>93840 |
| 3246 | Homozygous<br>PS in RH | PGSC0003DMG40004<br>3452 | PGSC0003DMT4000<br>93881 |
| 3247 | Homozygous<br>PS in RH | PGSC0003DMG40004<br>3634 | PGSC0003DMT4000<br>94063 |
| 3248 | Homozygous<br>PS in RH | PGSC0003DMG40004<br>3793 | PGSC0003DMT4000<br>94222 |
| 3249 | Homozygous<br>PS in RH | PGSC0003DMG40004<br>3806 | PGSC0003DMT4000<br>94235 |
| 3250 | Homozygous<br>PS in RH | PGSC0003DMG40004<br>3810 | PGSC0003DMT4000<br>94239 |
| 3251 | Homozygous<br>PS in RH | PGSC0003DMG40004<br>3821 | PGSC0003DMT4000<br>94250 |
| 3252 | Homozygous<br>PS in RH | PGSC0003DMG40004<br>3905 | PGSC0003DMT4000<br>94334 |
| 3253 | Homozygous<br>PS in RH | PGSC0003DMG40004<br>3933 | PGSC0003DMT4000<br>94362 |
| 3254 | Homozygous<br>PS in RH | PGSC0003DMG40004<br>3951 | PGSC0003DMT4000<br>94380 |
| 3255 | Homozygous<br>PS in RH | PGSC0003DMG40004<br>4006 | PGSC0003DMT4000<br>94435 |
| 3256 | Homozygous<br>PS in RH | PGSC0003DMG40004<br>4145 | PGSC0003DMT4000<br>94574 |
| 3257 | Homozygous<br>PS in RH | PGSC0003DMG40004<br>4155 | PGSC0003DMT4000<br>94584 |
| 3258 | Homozygous<br>PS in RH | PGSC0003DMG40004<br>4174 | PGSC0003DMT4000<br>94603 |
| 3259 | Homozygous<br>PS in RH | PGSC0003DMG40004<br>4211 | PGSC0003DMT4000<br>94640 |

|      |                        |                          |                          |
|------|------------------------|--------------------------|--------------------------|
| 3260 | Homozygous<br>PS in RH | PGSC0003DMG40004<br>4238 | PGSC0003DMT4000<br>94667 |
| 3261 | Homozygous<br>PS in RH | PGSC0003DMG40004<br>4253 | PGSC0003DMT4000<br>94682 |
| 3262 | Homozygous<br>PS in RH | PGSC0003DMG40004<br>4394 | PGSC0003DMT4000<br>94823 |
| 3263 | Homozygous<br>PS in RH | PGSC0003DMG40004<br>4529 | PGSC0003DMT4000<br>94958 |
| 3264 | Homozygous<br>PS in RH | PGSC0003DMG40004<br>4571 | PGSC0003DMT4000<br>95000 |
| 3265 | Homozygous<br>PS in RH | PGSC0003DMG40004<br>4719 | PGSC0003DMT4000<br>95148 |
| 3266 | Homozygous<br>PS in RH | PGSC0003DMG40004<br>4872 | PGSC0003DMT4000<br>95301 |
| 3267 | Homozygous<br>PS in RH | PGSC0003DMG40004<br>4908 | PGSC0003DMT4000<br>95337 |
| 3268 | Homozygous<br>PS in RH | PGSC0003DMG40004<br>4923 | PGSC0003DMT4000<br>95352 |
| 3269 | Homozygous<br>PS in RH | PGSC0003DMG40004<br>4936 | PGSC0003DMT4000<br>95365 |
| 3270 | Homozygous<br>PS in RH | PGSC0003DMG40004<br>5171 | PGSC0003DMT4000<br>95600 |
| 3271 | Homozygous<br>PS in RH | PGSC0003DMG40004<br>5244 | PGSC0003DMT4000<br>95673 |
| 3272 | Homozygous<br>PS in RH | PGSC0003DMG40004<br>5269 | PGSC0003DMT4000<br>95698 |
| 3273 | Homozygous<br>PS in RH | PGSC0003DMG40004<br>5334 | PGSC0003DMT4000<br>95763 |
| 3274 | Homozygous<br>PS in RH | PGSC0003DMG40004<br>5407 | PGSC0003DMT4000<br>95836 |
| 3275 | Homozygous<br>PS in RH | PGSC0003DMG40004<br>5424 | PGSC0003DMT4000<br>95853 |
| 3276 | Homozygous<br>PS in RH | PGSC0003DMG40004<br>5486 | PGSC0003DMT4000<br>95915 |
| 3277 | Homozygous<br>PS in RH | PGSC0003DMG40004<br>5498 | PGSC0003DMT4000<br>95927 |
| 3278 | Homozygous<br>PS in RH | PGSC0003DMG40004<br>5723 | PGSC0003DMT4000<br>96152 |



|      |                        |                          |                          |
|------|------------------------|--------------------------|--------------------------|
| 3279 | Homozygous<br>PS in RH | PGSC0003DMG40004<br>5724 | PGSC0003DMT4000<br>96153 |
| 3280 | Homozygous<br>PS in RH | PGSC0003DMG40004<br>5789 | PGSC0003DMT4000<br>96218 |
| 3281 | Homozygous<br>PS in RH | PGSC0003DMG40004<br>5817 | PGSC0003DMT4000<br>96246 |
| 3282 | Homozygous<br>PS in RH | PGSC0003DMG40004<br>5889 | PGSC0003DMT4000<br>96318 |
| 3283 | Homozygous<br>PS in RH | PGSC0003DMG40004<br>5954 | PGSC0003DMT4000<br>96383 |
| 3284 | Homozygous<br>PS in RH | PGSC0003DMG40004<br>6012 | PGSC0003DMT4000<br>96441 |
| 3285 | Homozygous<br>PS in RH | PGSC0003DMG40004<br>6073 | PGSC0003DMT4000<br>96502 |
| 3286 | Homozygous<br>PS in RH | PGSC0003DMG40004<br>6159 | PGSC0003DMT4000<br>96588 |
| 3287 | Homozygous<br>PS in RH | PGSC0003DMG40004<br>6176 | PGSC0003DMT4000<br>96605 |
| 3288 | Homozygous<br>PS in RH | PGSC0003DMG40004<br>6225 | PGSC0003DMT4000<br>96654 |
| 3289 | Homozygous<br>PS in RH | PGSC0003DMG40004<br>6274 | PGSC0003DMT4000<br>96703 |
| 3290 | Homozygous<br>PS in RH | PGSC0003DMG40004<br>6291 | PGSC0003DMT4000<br>96720 |
| 3291 | Homozygous<br>PS in RH | PGSC0003DMG40004<br>6601 | PGSC0003DMT4000<br>97030 |
| 3292 | Homozygous<br>PS in RH | PGSC0003DMG40004<br>6623 | PGSC0003DMT4000<br>97052 |
| 3293 | Homozygous<br>PS in RH | PGSC0003DMG40004<br>6641 | PGSC0003DMT4000<br>97070 |
| 3294 | Homozygous<br>PS in RH | PGSC0003DMG40004<br>6688 | PGSC0003DMT4000<br>97117 |
| 3295 | Homozygous<br>PS in RH | PGSC0003DMG40004<br>6702 | PGSC0003DMT4000<br>97131 |
| 3296 | Homozygous<br>PS in RH | PGSC0003DMG40004<br>6798 | PGSC0003DMT4000<br>97227 |
| 3297 | Homozygous<br>PS in RH | PGSC0003DMG40004<br>6862 | PGSC0003DMT4000<br>97291 |

|      |            |                  |                 |
|------|------------|------------------|-----------------|
| 3298 | Homozygous | PGSC0003DMG40004 | PGSC0003DMT4000 |
|      | PS in RH   | 6868             | 97297           |
| 3299 | Homozygous | PGSC0003DMG40004 | PGSC0003DMT4000 |
|      | PS in RH   | 6876             | 97305           |
| 3300 | Homozygous | PGSC0003DMG40004 | PGSC0003DMT4000 |
|      | PS in RH   | 6942             | 97371           |
| 3301 | Homozygous | PGSC0003DMG40004 | PGSC0003DMT4000 |
|      | PS in RH   | 6951             | 97380           |
| 3302 | Homozygous | PGSC0003DMG40004 | PGSC0003DMT4000 |
|      | PS in RH   | 6972             | 97401           |
| 3303 | Homozygous | PGSC0003DMG40004 | PGSC0003DMT4000 |
|      | PS in RH   | 6996             | 97425           |
| 3304 | Homozygous | PGSC0003DMG40004 | PGSC0003DMT4000 |
|      | PS in RH   | 7036             | 97465           |
| 3305 | Homozygous | PGSC0003DMG40004 | PGSC0003DMT4000 |
|      | PS in RH   | 7052             | 97481           |
| 3306 | Homozygous | PGSC0003DMG40004 | PGSC0003DMT4000 |
|      | PS in RH   | 7128             | 97557           |

**Supplementary Table 14. Genes with frameshifts.**

| FS Code | Category              | Gene in DM           | Transcript in DM     | Chromosome | RNA-seq support in DM | RNA-seq support in RH | Functional annotation                                                                                                                                         |
|---------|-----------------------|----------------------|----------------------|------------|-----------------------|-----------------------|---------------------------------------------------------------------------------------------------------------------------------------------------------------|
| 1       | Heterozygous FS in RH | PGSC0003DMG402009270 | PGSC0003DMT400023971 | chr11      | yes                   | yes                   |                                                                                                                                                               |
| 2       | Homozygous FS in RH   | PGSC0003DMG400010174 | PGSC0003DMT400026375 | chr03      | yes                   | yes                   | GO:0016021; integral to membrane; Cellular Component                                                                                                          |
| 3       | Homozygous FS in RH   | PGSC0003DMG400015790 | PGSC0003DMT400040840 | chr03      | yes                   | yes                   | GO:0004713; protein tyrosine kinase activity; Molecular Function                                                                                              |
| 4       | Homozygous FS in RH   | PGSC0003DMG400015511 | PGSC0003DMT400040097 | chr02      | yes                   | yes                   | GO:0005524; ATP binding; Molecular Function GO:0006468; protein amino acid phosphorylation; Biological Process                                                |
| 5       | Homozygous FS in RH   | PGSC0003DMG400022832 | PGSC0003DMT400058772 | chr10      | yes                   | yes                   | GO:0003824; catalytic activity; Molecular Function GO:0016020; membrane; Cellular Component                                                                   |
| 6       | Heterozygous FS in RH | PGSC0003DMG400041247 | PGSC0003DMT400091676 | chr01      | NO                    | NO                    |                                                                                                                                                               |
| 7       | Homozygous FS in RH   | PGSC0003DMG400015501 | PGSC0003DMT400040071 | chr02      | yes                   | yes                   |                                                                                                                                                               |
| 8       | Homozygous FS in RH   | PGSC0003DMG400010150 | PGSC0003DMT400026296 | chr03      | yes                   | yes                   |                                                                                                                                                               |
| 9       | Homozygous FS in RH   | PGSC0003DMG400009277 | PGSC0003DMT400023983 | chr11      | yes                   | yes                   |                                                                                                                                                               |
| 10      | Heterozygous FS in RH | PGSC0003DMG400015786 | PGSC0003DMT400040825 | chr03      | yes                   | yes                   |                                                                                                                                                               |
| 11      | Heterozygous FS in RH | PGSC0003DMG400008761 | PGSC0003DMT400022600 | chr01      | yes                   | yes                   |                                                                                                                                                               |
| 12      | Homozygous FS in RH   | PGSC0003DMG400041225 | PGSC0003DMT400091654 | chr12      | yes                   | yes                   |                                                                                                                                                               |
| 13      | Homozygous FS in RH   | PGSC0003DMG400010122 | PGSC0003DMT400026242 | chr03      | yes                   | yes                   |                                                                                                                                                               |
| 14      | Heterozygous FS in RH | PGSC0003DMG400010151 | PGSC0003DMT400026299 | chr03      | yes                   | yes                   |                                                                                                                                                               |
| 15      | Homozygous FS in RH   | PGSC0003DMG400010176 | PGSC0003DMT400026381 | chr03      | yes                   | yes                   |                                                                                                                                                               |
| 16      | Homozygous FS in RH   | PGSC0003DMG400015495 | PGSC0003DMT400040055 | chr02      | yes                   | yes                   | GO:0006950; response to stress; Biological Process GO:0009415; response to water; Biological Process                                                          |
| 17      | Homozygous FS in RH   | PGSC0003DMG401015792 | PGSC0003DMT400040845 | chr03      | yes                   | yes                   |                                                                                                                                                               |
| 18      | Homozygous FS in RH   | PGSC0003DMG400008786 | PGSC0003DMT400022662 | chr11      | yes                   | yes                   |                                                                                                                                                               |
| 19      | Homozygous FS in RH   | PGSC0003DMG400025629 | PGSC0003DMT400065842 | chr03      | yes                   | yes                   |                                                                                                                                                               |
| 20      | Homozygous FS in RH   | PGSC0003DMG400015490 | PGSC0003DMT400040043 | chr02      | yes                   | yes                   | GO:0016757; transferase activity, transferring glycosyl groups; Molecular Function                                                                            |
| 21      | Homozygous FS in RH   | PGSC0003DMG400010167 | PGSC0003DMT400026356 | chr03      | yes                   | yes                   |                                                                                                                                                               |
| 22      | Heterozygous FS in RH | PGSC0003DMG402017902 | PGSC0003DMT400046121 | chr01      | yes                   | yes                   | GO:0006820; anion transport; Biological Process GO:0015380; anion exchanger activity; Molecular Function GO:0016021; integral to membrane; Cellular Component |

|    |                       |                      |                      |       |     |     |                                                                                                                                                                                                                                                                                    |
|----|-----------------------|----------------------|----------------------|-------|-----|-----|------------------------------------------------------------------------------------------------------------------------------------------------------------------------------------------------------------------------------------------------------------------------------------|
| 23 | Heterozygous FS in RH | PGSC0003DMG400013928 | PGSC0003DMT400036188 | chr11 | yes | yes | GO:0004672; protein kinase activity; Molecular Function GO:0005524; ATP binding; Molecular Function GO:0006468; protein amino acid phosphorylation; Biological Process GO:0016491; oxidoreductase activity; Molecular Function GO:0055114; oxidation reduction; Biological Process |
| 24 | Homozygous FS in RH   | PGSC0003DMG400010386 | PGSC0003DMT400026930 | chr02 | yes | yes |                                                                                                                                                                                                                                                                                    |
| 25 | Homozygous FS in RH   | PGSC0003DMG400023281 | PGSC0003DMT400059853 | chr11 | yes | yes |                                                                                                                                                                                                                                                                                    |
| 26 | Homozygous FS in RH   | PGSC0003DMG401026624 | PGSC0003DMT400068472 | chr10 | yes | yes |                                                                                                                                                                                                                                                                                    |
| 27 | Homozygous FS in RH   | PGSC0003DMG400015502 | PGSC0003DMT400040074 | chr02 | yes | yes | GO:0003700; transcription factor activity; Molecular Function GO:0006355; regulation of transcription, DNA-dependent; Biological Process GO:0008270; zinc ion binding; Molecular Function GO:0043565; sequence-specific DNA binding; Molecular Function                            |
| 28 | Heterozygous FS in RH | PGSC0003DMG400026623 | PGSC0003DMT400068470 | chr10 | yes | yes |                                                                                                                                                                                                                                                                                    |
| 29 | Homozygous FS in RH   | PGSC0003DMG400009278 | PGSC0003DMT400023985 | chr11 | yes | yes | GO:0005524; ATP binding; Molecular Function GO:0006139; nucleobase, nucleoside, nucleotide and nucleic acid metabolic process; Biological Process GO:0016773; phosphotransferase activity, alcohol group as acceptor; Molecular Function                                           |
| 30 | Heterozygous FS in RH | PGSC0003DMG400015800 | PGSC0003DMT400040866 | chr03 | yes | yes | GO:0006511; ubiquitin-dependent protein catabolic process; Biological Process                                                                                                                                                                                                      |
| 31 | Homozygous FS in RH   | PGSC0003DMG401033888 | PGSC0003DMT400084231 | chr01 | yes | yes | GO:0006950; response to stress; Biological Process                                                                                                                                                                                                                                 |
| 32 | Homozygous FS in RH   | PGSC0003DMG400013068 | PGSC0003DMT400033993 | chr01 | yes | yes | GO:0005524; ATP binding; Molecular Function                                                                                                                                                                                                                                        |
| 33 | Homozygous FS in RH   | PGSC0003DMG400022836 | PGSC0003DMT400058778 | chr10 | yes | yes | GO:0003677; DNA binding; Molecular Function                                                                                                                                                                                                                                        |
| 34 | Homozygous FS in RH   | PGSC0003DMG400015505 | PGSC0003DMT400040083 | chr02 | yes | yes | GO:0016747; transferase activity, transferring acyl groups other than amino-acyl groups; Molecular Function                                                                                                                                                                        |
| 35 | Homozygous FS in RH   | PGSC0003DMG400009257 | PGSC0003DMT400023939 | chr11 | yes | yes |                                                                                                                                                                                                                                                                                    |
| 36 | Heterozygous FS in RH | PGSC0003DMG400030273 | PGSC0003DMT400077828 | chr05 | yes | yes |                                                                                                                                                                                                                                                                                    |
| 37 | Homozygous FS in RH   | PGSC0003DMG402026624 | PGSC0003DMT400068473 | chr10 | yes | yes | GO:0006629; lipid metabolic process; Biological Process GO:0016788; hydrolase activity, acting on ester bonds; Molecular Function                                                                                                                                                  |

|    |                       |                      |                      |       |     |     |                                                                                                                                                                                                                                                                                    |
|----|-----------------------|----------------------|----------------------|-------|-----|-----|------------------------------------------------------------------------------------------------------------------------------------------------------------------------------------------------------------------------------------------------------------------------------------|
| 38 | Heterozygous FS in RH | PGSC0003DMG400019376 | PGSC0003DMT400049870 | chr12 | yes | yes |                                                                                                                                                                                                                                                                                    |
| 39 | Homozygous FS in RH   | PGSC0003DMG400010168 | PGSC0003DMT400026358 | chr03 | yes | yes | GO:0005524; ATP binding; Molecular Function GO:0009058; biosynthetic process; Biological Process GO:0016874; ligase activity; Molecular Function                                                                                                                                   |
| 40 | Heterozygous FS in RH | PGSC0003DMG400022816 | PGSC0003DMT400058733 | chr10 | yes | yes |                                                                                                                                                                                                                                                                                    |
| 41 | Heterozygous FS in RH | PGSC0003DMG400024185 | PGSC0003DMT400062149 | chr02 | yes | yes |                                                                                                                                                                                                                                                                                    |
| 42 | Homozygous FS in RH   | PGSC0003DMG400010163 | PGSC0003DMT400026334 | chr03 | yes | yes | GO:0000151; ubiquitin ligase complex; Cellular Component GO:0004842; ubiquitin-protein ligase activity; Molecular Function GO:0005634; nucleus; Cellular Component GO:0008270; zinc ion binding; Molecular Function GO:0016567; protein ubiquitination; Biological Process         |
| 43 | Heterozygous FS in RH | PGSC0003DMG400017904 | PGSC0003DMT400046123 | chr01 | yes | yes |                                                                                                                                                                                                                                                                                    |
| 44 | Homozygous FS in RH   | PGSC0003DMG400010186 | PGSC0003DMT400026409 | chr03 | yes | yes |                                                                                                                                                                                                                                                                                    |
| 45 | Homozygous FS in RH   | PGSC0003DMG400022830 | PGSC0003DMT400058762 | chr10 | yes | yes |                                                                                                                                                                                                                                                                                    |
| 46 | Heterozygous FS in RH | PGSC0003DMG400015794 | PGSC0003DMT400040852 | chr03 | yes | yes | GO:0016765; transferase activity, transferring alkyl or aryl (other than methyl) groups; Molecular Function GO:0008152; metabolic process; Biological Process GO:0016491; oxidoreductase activity; Molecular Function                                                              |
| 47 | Heterozygous FS in RH | PGSC0003DMG400015793 | PGSC0003DMT400040848 | chr03 | yes | yes |                                                                                                                                                                                                                                                                                    |
| 48 | Heterozygous FS in RH | PGSC0003DMG400015513 | PGSC0003DMT400040100 | chr02 | yes | yes |                                                                                                                                                                                                                                                                                    |
| 49 | Heterozygous FS in RH | PGSC0003DMG400010118 | PGSC0003DMT400026232 | chr03 | yes | yes |                                                                                                                                                                                                                                                                                    |
| 50 | Heterozygous FS in RH | PGSC0003DMG400010407 | PGSC0003DMT400026983 | chr02 | yes | yes | GO:0005506; iron ion binding; Molecular Function GO:0005783; endoplasmic reticulum; Cellular Component GO:0006633; fatty acid biosynthetic process; Biological Process GO:0016491; oxidoreductase activity; Molecular Function GO:0055114; oxidation reduction; Biological Process |
| 51 | Homozygous FS in RH   | PGSC0003DMG400010169 | PGSC0003DMT400026363 | chr03 | yes | yes |                                                                                                                                                                                                                                                                                    |
| 52 | Heterozygous FS in RH | PGSC0003DMG400010390 | PGSC0003DMT400026945 | chr02 | yes | yes | GO:0006886; intracellular protein transport; Biological Process GO:0016020; membrane; Cellular Component                                                                                                                                                                           |
| 53 | Heterozygous FS in RH | PGSC0003DMG400018832 | PGSC0003DMT400048482 | chr05 | yes | yes |                                                                                                                                                                                                                                                                                    |

|    |                       |                      |                      |       |     |     |                                                                                                                                                                                                                                                                                              |
|----|-----------------------|----------------------|----------------------|-------|-----|-----|----------------------------------------------------------------------------------------------------------------------------------------------------------------------------------------------------------------------------------------------------------------------------------------------|
| 54 | Heterozygous FS in RH | PGSC0003DMG400015484 | PGSC0003DMT400040028 | chr02 | yes | yes | GO:0005507; copper ion binding; Molecular Function GO:0016491; oxidoreductase activity; Molecular Function GO:0055114; oxidation reduction; Biological Process GO:0003747; translation release factor activity; Molecular Function GO:0006415; translational termination; Biological Process |
| 55 | Heterozygous FS in RH | PGSC0003DMG400009256 | PGSC0003DMT400023934 | chr11 | yes | yes | GO:0008080; N-acetyltransferase activity; Molecular Function GO:0008152; metabolic process; Biological Process                                                                                                                                                                               |
| 56 | Homozygous FS in RH   | PGSC0003DMG400020758 | PGSC0003DMT400053512 | chr05 | yes | yes |                                                                                                                                                                                                                                                                                              |
| 57 | Homozygous FS in RH   | PGSC0003DMG400009276 | PGSC0003DMT400023981 | chr11 | yes | yes |                                                                                                                                                                                                                                                                                              |
| 58 | Heterozygous FS in RH | PGSC0003DMG400039256 | PGSC0003DMT400089685 | chr11 | yes | yes |                                                                                                                                                                                                                                                                                              |
| 59 | Homozygous FS in RH   | PGSC0003DMG400010175 | PGSC0003DMT400026377 | chr03 | yes | yes |                                                                                                                                                                                                                                                                                              |
| 60 | Homozygous FS in RH   | PGSC0003DMG400010406 | PGSC0003DMT400026981 | chr02 | yes | yes |                                                                                                                                                                                                                                                                                              |
| 61 | Homozygous FS in RH   | PGSC0003DMG400022829 | PGSC0003DMT400058761 | chr10 | yes | yes |                                                                                                                                                                                                                                                                                              |
| 62 | Homozygous FS in RH   | PGSC0003DMG400010387 | PGSC0003DMT400026935 | chr02 | yes | yes |                                                                                                                                                                                                                                                                                              |
| 63 | Heterozygous FS in RH | PGSC0003DMG400000949 | PGSC0003DMT400002491 | chr09 | yes | yes | GO:0004221; ubiquitin thiolesterase activity; Molecular Function GO:0005622; intracellular; Cellular Component GO:0006511; ubiquitin-dependent protein catabolic process; Biological Process                                                                                                 |
| 64 | Homozygous FS in RH   | PGSC0003DMG400013088 | PGSC0003DMT400034053 | chr01 | yes | yes |                                                                                                                                                                                                                                                                                              |
| 65 | Homozygous FS in RH   | PGSC0003DMG400015802 | PGSC0003DMT400040869 | chr03 | yes | yes | GO:0004672; protein kinase activity; Molecular Function GO:0005524; ATP binding; Molecular Function GO:0006468; protein amino acid phosphorylation; Biological Process                                                                                                                       |
| 66 | Homozygous FS in RH   | PGSC0003DMG400015788 | PGSC0003DMT400040832 | chr03 | yes | yes |                                                                                                                                                                                                                                                                                              |
| 67 | Heterozygous FS in RH | PGSC0003DMG400024181 | PGSC0003DMT400062136 | chr02 | yes | yes | GO:0006633; fatty acid biosynthetic process; Biological Process GO:0008610; lipid biosynthetic process; Biological Process GO:0016020; membrane; Cellular Component GO:0016747; transferase activity, transferring acyl groups other than amino-acyl groups; Molecular Function              |

|    |                       |                      |                      |       |     |     |                                                                                                                                                                                                                                                                                                                                                                             |
|----|-----------------------|----------------------|----------------------|-------|-----|-----|-----------------------------------------------------------------------------------------------------------------------------------------------------------------------------------------------------------------------------------------------------------------------------------------------------------------------------------------------------------------------------|
| 68 | Heterozygous FS in RH | PGSC0003DMG400015476 | PGSC0003DMT400040010 | chr02 | yes | yes | GO:0004713; protein tyrosine kinase activity; Molecular Function<br>GO:0005524; ATP binding; Molecular Function<br>GO:0006468; protein amino acid phosphorylation; Biological Process<br>GO:0015979; photosynthesis; Biological Process<br>GO:0015995; chlorophyll biosynthetic process; Biological Process<br>GO:0016851; magnesium chelatase activity; Molecular Function |
| 69 | Homozygous FS in RH   | PGSC0003DMG400026627 | PGSC0003DMT400068480 | chr10 | yes | yes |                                                                                                                                                                                                                                                                                                                                                                             |
| 70 | Heterozygous FS in RH | PGSC0003DMG400043518 | PGSC0003DMT400093947 | chr11 | yes | yes |                                                                                                                                                                                                                                                                                                                                                                             |
| 71 | Heterozygous FS in RH | PGSC0003DMG400022833 | PGSC0003DMT400058773 | chr10 | yes | yes | GO:0003924; GTPase activity; Molecular Function<br>GO:0005525; GTP binding; Molecular Function<br>GO:0006955; immune response; Biological Process                                                                                                                                                                                                                           |
| 72 | Homozygous FS in RH   | PGSC0003DMG400022839 | PGSC0003DMT400058784 | chr10 | yes | yes |                                                                                                                                                                                                                                                                                                                                                                             |
| 73 | Homozygous FS in RH   | PGSC0003DMG400022819 | PGSC0003DMT400058741 | chr10 | yes | yes |                                                                                                                                                                                                                                                                                                                                                                             |
| 74 | Heterozygous FS in RH | PGSC0003DMG401017902 | PGSC0003DMT400046119 | chr01 | yes | yes |                                                                                                                                                                                                                                                                                                                                                                             |
| 75 | Homozygous FS in RH   | PGSC0003DMG400015507 | PGSC0003DMT400040088 | chr02 | yes | yes |                                                                                                                                                                                                                                                                                                                                                                             |
| 76 | Homozygous FS in RH   | PGSC0003DMG400015491 | PGSC0003DMT400040046 | chr02 | yes | yes |                                                                                                                                                                                                                                                                                                                                                                             |
| 77 | Heterozygous FS in RH | PGSC0003DMG400026621 | PGSC0003DMT400068458 | chr10 | yes | yes |                                                                                                                                                                                                                                                                                                                                                                             |
| 78 | Homozygous FS in RH   | PGSC0003DMG400015492 | PGSC0003DMT400040051 | chr02 | yes | yes | GO:0005524; ATP binding; Molecular Function                                                                                                                                                                                                                                                                                                                                 |
| 79 | Homozygous FS in RH   | PGSC0003DMG400020757 | PGSC0003DMT400053511 | chr05 | yes | yes |                                                                                                                                                                                                                                                                                                                                                                             |
| 80 | Homozygous FS in RH   | PGSC0003DMG402009259 | PGSC0003DMT400023943 | chr11 | yes | yes |                                                                                                                                                                                                                                                                                                                                                                             |

Supplementary Table 15. RH specific genes

| Code | RNA-seq support in RH | Functional annotation                                 | Sequence                                                                                                                                                                                                                                                                                                                                                                                                                                                                                                                                                                                                                                                                                                                                                                                                                                                                                                                                                                                                                                                                                                                                                                                                                                                                                                                                                                                                                                                                                                                             |
|------|-----------------------|-------------------------------------------------------|--------------------------------------------------------------------------------------------------------------------------------------------------------------------------------------------------------------------------------------------------------------------------------------------------------------------------------------------------------------------------------------------------------------------------------------------------------------------------------------------------------------------------------------------------------------------------------------------------------------------------------------------------------------------------------------------------------------------------------------------------------------------------------------------------------------------------------------------------------------------------------------------------------------------------------------------------------------------------------------------------------------------------------------------------------------------------------------------------------------------------------------------------------------------------------------------------------------------------------------------------------------------------------------------------------------------------------------------------------------------------------------------------------------------------------------------------------------------------------------------------------------------------------------|
| 1    | yes                   | GO:0003676; nucleic acid binding; Molecular Function; | <p>ATGAGCCAGACGCTTGTGTCCGAGTATAAAACAACCTAACATGGGGCATGAATGGAAGGACATTATAAACATTCTA<br/> GATTGCAAGTTTTTTGTAAAAAAGAGCATATGGGTAAAGTGAACAGACCTGAGGTTCTATGTGTCAAGATAAAT<br/> TCTGATGGAAGTTGTTTGGAGGGCAATGTGGTGGAGGCGGAGTCATAAGGGACAATGATGGTAAGTTTATTTTT<br/> GGTACTCTCTCAAGTTGGGAAAGGGGACTAGCACCTGGGCAGAAGTTGTGGCGCTTGGGTTTGAATAAAAATG<br/> GTGTTTAGAGAATGGTTTCTCTCTTTTACTGCAGAAAGTGACTCCAAAGTTCTTGTGGATAGTGTCAACAATTGT<br/> CACTCAACTCCTTGGAGAATTATGGATGATGTTAATGAAATTATTAGACTTAAGGAGCTTGCAGGTTTTAATATGGT<br/> GCACTGTTTTTGTACGCCCAAATTCAAGGAGCGCAACTGGCTCCTAA</p>                                                                                                                                                                                                                                                                                                                                                                                                                                                                                                                                                                                                                                                                                                                                                                                                                                                                                                                                                                          |
| 2    | yes                   |                                                       | <p>ATGACCACCAAATCGCCCGGTCAACCTCTCACTGGGGTTGATTTAGATCTGAAGGAAAGAGAACCAACTTCTAG<br/> GCTTGATTTTTTAGCTGCTGTAAGACCATCAAGGGAAGCTAATGCGATGGCGTTGAAACCTATTGTGTATTTTCAT<br/> GGTGAACCAAGAATAGTATGGGAGGAGGAAGAGGGTGAACGGATGATCGTGAAGGAGAACTTAGAGTATGCAG<br/> TGATAGGAAAAATTTCCCTATGGTTGGCCTGAGATTCAAGATTTGAGAAAATTAATTCCAAAGCAATGCAAGTTGA<br/> AAGGTGAATGCAACATAGGATTGTTAAGCAATAAGCATATTCTGATAAGGGCATTGTTCTTGGAGGACTACGTGAA<br/> TCTATTATCAAAGCCGACCTTTTACATATTGCATCGTGGGTGGACATATCCAATGCGAACGTTGAAGTGGGAGCCA<br/> ATGTTTCGATCCGGAGGAGGAAACATCAACGGCCATGGCATTGATTTCTTTTCCATCCCTGCCTCCAAATTTCTTTG<br/> TGAAGGAGGCAGTTTTTTTATTAGCAGCTGCAGTTGGAAAGCCTTTACAGGTTGATCTAGCAACAAGGAATCAG<br/> ACTCGACCTAGTTATGCACGGGTGAAGGTGGATGTGGGTTTATTACGTGAATTTCCAAAAAATAAACGTAGGG<br/> ATGCGAAAGCAATCAGGGGAGATTACAGAGAAATGGATTACAATAAGATATGATCATGTTCCAAAATATTGCAAG<br/> AACTGTAAGATTCAGGGTCATGATGAGGAGCAATGTTATGTGTTACATACGAATTTATATCCCAAGGAAAAAGAAG<br/> GGAAGAAAGAAGAGATGGAACAGGGGAGATTCATGGGAAGGGGAGGGTCCAGAGGGAGGGGGTGGAAAA<br/> CCAGAACAGATATGGCATAAGAAAAATATTCAACATGAGAAAGAGGGAATTACGACTAGCAATAAGTTTGGGGCG<br/> CTGAAAGATCAAGATGAATGTGGGGAGACACAAGGTGGACAAAAGGAAAGGGGGGAGGAGGTAGAGATGAAA<br/> AAATGGGTTGAGGAAGTGCTCCAAAAACAAGCAGAATAGATAAGGGGAGTAGTTTGAAAAATACAGTGGAGG<br/> ATATAACATGGTAGATGAAGAGGAGACGGTAGGGAGTGAAAACCTCAAGAATAGTGGAACATTGAGGTAAGC<br/> GGGAAACAAAAATGCAGTGAACAGGATGCCAGAAGTAGTAATATGGAGAATACATGTTTGGAGATGGTGAATT<br/> TCATGAGGTGCAGGATAACGATGAGGTTTTGCCTGAGAATCAAAGGAGGGAGAATCAGATTCAGGGGGATAAGT<br/> TTCTGATTTGCTAGAGCTGACATCGTAG</p> |



3      yes      ATGACTAACACCTCTCAAGTCTCCCTTCGTCCAAGCAAGAGACTGGAAAACCCCTCGTTCTCTTTCTCTCCTGTT  
GAGATTTCCGACTCTTCTATGGATGATCTCCCTGCTTCCTCTGCCTCTAACAAAAATCTCCCCTTCTGGACATG  
CACGCAAGAAGCACAAAGCAGATTCCGTGGATTTCAAACCAGAAGACCTGCAATTGTTCTGGAGCTCAGTGGAG  
AAGGCCAAGTTCATGGCTTTCAAAGACAGAACTTCGGCTCCTGGACGAGTAATTTGCCTCAATCAACTGGAAGG  
CTCTCATTGCCCTGTGAGTATGTATTTCAATTTCCAGAACTGCATCTTTTCTTCTTGCTCTGTGAAAATGAAGTGT  
TTGAGGAACCCGTTAAAATGTTCTATGCAAATCTTCGCGTCTCTAAGGACAATGGTGAATTAGAAACCCCTTGTT  
GGGGTATCGCATTGTGCTCAGTCAAGATCTCCTTGAAAAGGTTTTTGGAACTAAGTTCTCTGGAAGAATCTCCTTT  
TTTAGCGGAAACTGGCCTGATGATTTTGAAGTTACTCTCGAAGAGGCCAAACGAGCCATTGCTGAGAAAGGTTT  
GAATCTCTCTGATTTTGGACCCCTACTATCTGTTTTGAACATAGAATCCTGGGTCACATCGTTGCTACTACTCTGC  
TTCCCGCAAAGCTCTCTTAGCTCCCTCACTATTTCGAGATGTTTTTGTGTGATTGTCTGATAAGGAAAATCAA  
GATTAATTGGGCTGAATGGTTTTCTCGGTTACATGGAGGAAAGCTCTCAAGACTCCAGCGGGTCTGCTAGTCTACC  
TTATGGGATGGTGATCTCTCGCATCCTTAAGGTTGTTGGGGTAGATCTGTCTGAATACACTGCAAACAAGATCTCT  
GCTACCTATGATCTCACAACTTCGCCAGCATGGGATATACTCTTGCAAATGGAAGGTGGACAAAGAAAGCTCTC  
TTCAAGCCTAAGGTGGGATTTTCAAGACGAAGAAAAGGCTACTGCAACCTCTGAAATAGACATCCTAAAGGTGAG  
TGTAGCAGAATTAATGAAAGAAGCCATGGAGATCAAACACACGTTAGCTGCAGTGGTTGATGGCATAACAGAAGG  
TGCAAGATTCCCTGTCCAGCATTCTACTCTATCTGAAGGCACAAGTTCAGCTTCAACTGAACCACCTGCGCAGT  
GA

4      NO      ATGAAGGATGAAGAGGATTGGACGGTGACATTCAACTATTTTGGTTTAAGACTGTTGGTCTTAGAGCGTGTGATC  
GTGGGATGGGGAAGTGGTTTTGGTTGCTATTGTAACCTTGTTGGGATAGATAGGTTGGAAATCATTGTCGGTTGAAA  
GTAAGGGGATTGTGTGGTGAAGAGTGTGTAAGATTGAGGGCAAGAGGTTTTGCAATGGTGAAGAAGGATATTGT  
TGTGGTGTGAAACCAGAGGAATTGATGGCTGAATTTGAATTGGCAAGAAAGATTGAGAATTACCTGACCGATGG  
AGGCACAGTGGTCTACAGAGGAGAGCAAGAGTGA

5      NO      ATGACTAACAGAAGAATTCAATAGACGTGGGCAGAGCATCAACATATTACTAGTGTTCAGCAGGTGGTTGG  
GCTAGAAGGCCTCCGTTGGGCATAAACCTGGAGTTCCAAGGCATCCTTCATCATTTAAAGAGTCTGGGGGCAGCC  
CCAGCTTTGACAACGTCTTTGGCTACCTTAATTCCTCAATATTCAGTGTTAGGAGGTGTGAGGTCTTACGAGGAAA  
AGGCTAGGCATATCCCCACATTGTTCCCTTCAAATCAGGAGTTAAGTCAGAGATTCATCGGAGGGTTGGCTTAC  
AACTCTGGTTGGTGTGCCTTGAGAGTTACAAAGATAGCGGTAAGGGACCTCGTACCAGTACAATGGTGACAAC  
ATTCCATTTCAAGAGGTAGATAGGGTAGATAACTGTATTGTTACGTTGGGCTTACGCTATAGAGGTTTCTATGAT  
TATGGAGGGCTTGAAGAATGATCTAGAGAGTGCCCCAAGAGGGAGTTTCTTTTCCAGGCATTGCAGATATCTGAT  
ACTCCCCATGGTAGGGCGGTCGTACTTGGTTGTACATGTGAAGAGCTTGGTTGAGGTTGAGAATGATCCGTTCTAT  
ACTTATTGGCCTAAGGCCAAGGCTCTAGGTATTCCTTATTTGGATGTGATTTTCATGGCCTTACCCTTTTGTCTCATT  
TTTGTGTGA

6      NO      ATGAAGGATATGCCTATCAATGTGGGAGTGGGGTTGATGTCTTTCATGTGGAAGGCTAGAGTGCACATAGGTAGA  
CGGTCTGAGATTGGGGACTTGACCACAAGCTTTTACGGAAAAGAAGGGGTTCCCGAGGAGAGTGTAGATTACAT  
AGAACCCCTGTTACCACACCTCTAGATGTCACGAAAATGAAGGGGCCTAAAAATGCTCATAGACCCACCCTCAC  
AATAGCAGAGAACAACAAGAAAGATGATTTGAATATGACCCACATGTATAGGCTTGAATGTTTTTCCACAAAA  
TGGGTGCCAGGCTTCCACTCTGGAGCAGCTGAGTGACAACAACAAGGTAACCTCTCAACTAG

- 7      yes      ATGGAGACTGAAATTGCAGCACTAATTGAGAATGAAACCTGGGAAGTAGTAGAATTACCAAAAGGAAGGAAAGC  
TTTACCATCCAAATGGGTGTATAAGATCAAGCACAACTCTGATGGAAGTATAGAAAGGCTAAAAGCACGATTGGT  
GATTAGAGGAGACATTCAAAGGAAGGGATTGACTTTAATGAGACCTTTTCACCGGTTGTCAAATGACAACAT  
CAGGTGCTTGTGATTATAGCAGTGAAAAAGGTTGGGAAATTCACAAATGGATGTGAATAATGCATTTTTACAT  
GGAGAACTTGATGAGGAGATTTTCATGAAGCTTCCAAATGGAATGCAATCAGTCAATCCGCAACATGTATGCAGG  
CTCAAAAAGTCCTTGTATGGACTTAGACAAGCTTCAAGACAATGGTACTCAAATTTGGCAGAAGCTTTGAATTCA  
AAAGGGTTTTCTTCATCACTGAATGATTATTCACTTTTCTTCAAATATCAGGTTCTCATATTTGTATCGTCGCAGTG  
TATGTTGATGATATTATTCTAACAGGAAACAACAGAGCCGAGATACAACATCTAAAGGAATTTCTGAATTCACAAT  
TCAAGATTAAGGATTTGGGTGATCTACACTATTTTTAGGTCTTGAATCGTAAGAGAACCAACAGGTATGATTGT  
AAGCCAAAGAAAGTTTACTCTAGAACTTTTGAATGAGTTCAATTGTGATCATTACCTCTTGTGACTTCTCCACTC  
GATCCTTCTTCCAACTGGATTTCTCCACTGGTGAGTTGCTCACTGATCCAATTCATATCGGAGGCTGCTTGGTA  
AGCTCAACTATCTCACTCACACTAGACCAGATCTCTCATTGTTGTACATCATCTCAGTCAGTACATGCAGCAACC  
AAGAGGTCCTCACTTTCAGCCGCATTAAGAGTATTGCGGTATCTTCGTTCAAATCCAAGCCAAGGGTTATTATA  
TCTGCTGATCCTTCAATCAAATTACTAGCTTTCTGCGATGCGGATTGGGGGCTTGCCCAATTCTCGTAAATCCAT  
CAGTGGATTCTTCATTAGTCTCGGAGGCTCACCAATCTCATGGAATCGAAGAAATAA
- 8      yes      ATGGATTTTTATTTCATCTAATGAGAAGTATACCGAAGCTTGCAAAGTGTTTCGATGAAATGTCTCATAGAGATACAAT  
AGCTTGGAAATGTGTTGATTTCTGTATACATGCGTAACCGACGAACTCGGGATGTTTTGGGTGTATTTGATATGATGC  
AGAGCTCGTATGATTGCCAACCTGACAATGTTACTTGTGTTGATGTTACTTCAGGCTTGTGCAAATTTGAATGCATT  
GGCATTGGGTGAGAGAGTTCATAGATATTGTGAAGAACATGGTTTTGACAAGGCAATGAATAACTGTAATGCATT  
TATAACTATGTACTCTCGGTGTGGTTGCCTCGAAAAGGCTTTTGAGGTGTTTAAGGGAATGACCGAGAAAGATGT  
GGTGTCTTGGACTGCCATGATATCGGGATTGGCTAGCAATGGTTATGGCAGAGATGCAATTGAGGCATTTCCGGG  
GATGCAAAGTGCAGGTGTTTCCCCTGATGATCAGACTTTCCTGAGGTTCTTCTGCTTGCAGTCACTCTGGACT  
ACTTGATGAGGGTAGGATGTTTTCAATAGTATGAGCAAAGAGTTGGGATTTACCAAACATTCATCATTATGGG  
TGTGTGGTTGATCTAATGGGTCGTGCTGGTATGGTTGATGAAGCTTACAACCTTATAAATTCGATGAAGGTCAAAC  
CAGATGCAACAATATGGAGGACTCTACTAGGAGCTTGTAGGATTCATACCAAGCTGACCTAGGAGAACAAGTCA  
TTGAGCGTTTGATAGAACTTAAAGCACAGAAGCCGGAGACTATGTACTACTGTTGAATATTTATTCATCGCTTGG  
TGATTGGGGTAAGGTAATGAACGTGAGAAAAATGATGAAAGACAGGGGAATCCAAACCAACCCTGCTTGTAGTA  
CTATTGAGTTCAGAGGAAAAATACATCAATTTCGTTGCAAATGACTTTTCGCACCCAAGAAAGACAGAAATTTACG  
AGATGTTGGATGAGATCAATCAGCAACTGAGGATAGCAGGATACGTTGCTGAGACAGTGGCAGAGTTGCACAAT  
GTGGGTACAGAAGAGAAGCAGATTGCATTATCTTATCACAGTGAGAAATTGGCTATAGCTTTTTCGCGTTCTATCAA  
CTCCACCTGGCACGTCAATTAGAGTTGCAAAAGACCTCCGATTTGTGTTGACTGCCATAACTTTGCCAAGATATT  
GTCAGCAGTCTATAGTCGGGAAGTTGTTATTAGAGATCGGAACCGCTTCCATCATTTCAGAGAAGGTCGATGCTC  
GTGCAATGACTATTGGTAA
- 9      NO      ATGCATACATGGCTAGGGAATCAAATCGCAATCCACATTCCTCACACTCATACTGCCTTGGCAAAGTTTTAAAT  
TTGGTCAACTCAGGCATCTTGGAACATTCAAGGTAGATAGTGATCTAAAAAAAAGCCTCAATGCAGTGATCCCAA  
GTGGCTGGGGTTCAATTGGTCCCTCTGGACCTCTCCCAACCATTTTACCATAGAAGTCCCATGTCTCTAAGCCTGAA  
TTGTGCTAATTCAACAGACTTTGTAGGTGAAGGAGGACTTAAGGCAGGGAGCTCTCAAACCCTTGAACCTTGT  
CCATTTAGAAGGAATAGGAGGAGCTGAAGGTGCTGGTGGAGGTCATGTGAGTCCTCGGGACTCCTGA

|    |     |                                                                                                                                                                                         |                                                                                                                                                                                                                                                                                                                                                                                                                                                                                                                                                                                                                                                                                                                                                                                                                                                                                                                                                                                                                                                                                                                                                                                                                                                                                                                                                                                                                                                                                                                                    |
|----|-----|-----------------------------------------------------------------------------------------------------------------------------------------------------------------------------------------|------------------------------------------------------------------------------------------------------------------------------------------------------------------------------------------------------------------------------------------------------------------------------------------------------------------------------------------------------------------------------------------------------------------------------------------------------------------------------------------------------------------------------------------------------------------------------------------------------------------------------------------------------------------------------------------------------------------------------------------------------------------------------------------------------------------------------------------------------------------------------------------------------------------------------------------------------------------------------------------------------------------------------------------------------------------------------------------------------------------------------------------------------------------------------------------------------------------------------------------------------------------------------------------------------------------------------------------------------------------------------------------------------------------------------------------------------------------------------------------------------------------------------------|
| 10 | NO  |                                                                                                                                                                                         | ATGGTAAAATTTACCCGGATGCAATAAATGATCCCTTAGGTACACCACAAAACAGGGCTAAGATGTTACACTT<br>CGAATGAAGCATGACCTTGCCGCTCTAATGGGTTGGTTGACACCCCTCATTTTAGATGTTACTCTTATGTGGATGG<br>TTGATGGAGTGAAGATCAAGAAGAAAGATATCAATATTAGCACCTGGTACTGGTTTATGTTTCATCATTAGCAACAT<br>CATGACATCTTAG                                                                                                                                                                                                                                                                                                                                                                                                                                                                                                                                                                                                                                                                                                                                                                                                                                                                                                                                                                                                                                                                                                                                                                                                                                                                        |
| 11 | NO  | GO:0003676;<br>nucleic acid<br>binding;<br>Molecular<br>Function;GO:000<br>8270; zinc ion<br>binding;<br>Molecular<br>Function;                                                         | ATGTCACCAGATCAGATTACTGATGAGAATAACAATGAGCATACAACTCATTTCACTGTGATTAATACACCACCTG<br>TTAGTGTAGGTAATCCTGCTAACTCTCCTTCTCTTGATCCTTGTTCATCCATACTATTTAAACCCTTATGATAATCTTG<br>GAGTTAATCTAATCAACATTACGTTTGATGGATCCAATTATGGCAATTGGAGGAGAGGAGTTCTTATCTCTCTTTCA<br>GCCAAGAAGAACTGGGGACATCAGTGAGAGTGATTTATTACAAACTGCTGTAGAACTCTGGGATGAACTTGA<br>AACTAGATATGGTCAAGCAGATAGTACCAAACCTCTCCAGCTGCAAAGAGAAATCAACAACATCAGCCAAGGGG<br>CAAGTGATATAGCAGGTTGTGAATGCAAATGTGGGGCTAAAGTTCACAACATTAGGATGAATGAAAATAAAAAAT<br>TAATTCAATTTCTTATGGGTCTGAATGAAGGATATTCTACTGTGAGAGCTAACATTTTGATGATGAAACCATTCCCC<br>ACTATTGCACAAGCATATTCCGTAATTTTGCATCAGGAAAGTCAAAGAGAGGTACTACTCTAACTCTGCTTCTACTA<br>CAGAATCTTCTACTTTTCTAAACACTGGTGGACAAAGATGGGCACCACAGAGGTATTCAGGGACACAAAAATCA<br>GGAAACCCACATGTCTATGGAGAGAACAATGATGATCAATATTGTAGGTACTGCAAGAAAACCTGGGCATCTCATG<br>GTAGATTGTCACAGGTTGATTGGATAACCATGCACATTACAAGATTAATAAGCAAAAAGAAAAGGGTCCACAACAG<br>GCAAATATAGCAAATGCTGCCATAACAGCTCAAACCTCGGGTGAATGAAATTTAGCAAATACTCTTTCTACTCTCG<br>TTGCAGGTCAAGGATTCTCTAGAGAACAGTGTAACCAATTGATTCATATGTTTCAAACCTGTGCATGGAAGTTCTGA<br>GGCTTCTAATTCGGGGACAATTCTAAGGCTAATCCATTTGGTATTCATCATGCTTGTGTTAGTTCTTAGCTCTTTTCT<br>TTCCAAAGTTACTAATTCACCCTGGATACTTGACAGTGGTGCAACCCAATATTTGACCTATAACAAATCTCTTTTAC<br>ACAATCTCACAACCTCTTCATTTTCTATTTATGTCAATTTGGCCAACCTCTCAACAGGTGGAAGCATTTTCTATGGGA<br>AGTCTGGAACCTTCAATAAGGAAGGTACCAATTATTGGTGTGCTGCTGGAGGACTCTATGTGCTGAAGGATGAT<br>ACTTCTACTGTGGAATCCAGTCCAACCACATCTTTTGTTCCTGTTTCTAGTTTTGTCAAAAATAAAGTTGAGTCTA<br>GTTCTTTAGGATCTATTTCTTCTTTTTTTTTAG |
| 12 | yes | GO:0003676;<br>nucleic acid<br>binding;<br>Molecular<br>Function;GO:000<br>3677; DNA<br>binding;<br>Molecular<br>Function;GO:001<br>5074; DNA<br>integration;<br>Biological<br>Process; | ATGAGCACTGCTTACTATCCTCAGACGGATGGCCAATCTGAGGTTCTCAATAAATGTGTTGAACAATATTTGCGTT<br>GTTATGTGGCAGATTCGCCAACTGACTGGGTCAACATGCTTCCCTTGGGCAGAGTATTGGTATAATACTTATTTCCA<br>AACCTCGGCTGATGTGTCTCCTTTTTCAGGCTTTGTATGGTCGTGCCCCACCAACTCTAGCTCGTTATGTTATTGATG<br>GAAGCTCCCATGAACTGGTAGAGCAGTTTTTCTTCATCGCGATGAGGTTTTGCAGTCGCTCAAAGCAAACCTTGT<br>TGCGAGCTCAAGGTCGTATGAAGAAATTTGCTGATAAAAAATGCACATGTGTCACCTTTGGACGTTGGTGATTTCGG<br>CGTATGTCAAATTACAGCCTTACAAACAACATTCCTTGTGTTTACATAAACATCACAAGTTGGATAGGAAGTATTT<br>TGGACCTTTCAAAGTGTACGACGCATCGATTCTGTGGCTTACAAATTAGAGTTACCAGCGGCTACTTCTATTTCAT<br>CCTGTCTTTACGATTTCGTTGCTAAAAAAATGTGTGATCTACCTGAACAACAACAACTACTCCATTAATATCAGTG<br>ACACATCTATTGTTGCTTTTGAACGAACCTTGTGGACAAGGTTCCATTTGGGGTAGGGGTAATGTTATGA                                                                                                                                                                                                                                                                                                                                                                                                                                                                                                                                                                                                                                                                                                                                                                                          |

|    |     |                                                                                                                                                                                                                                                                                                                                                                                                                                                                                                                                                                                                                                                                                                                                                                                                                                                                                                                                                                                  |
|----|-----|----------------------------------------------------------------------------------------------------------------------------------------------------------------------------------------------------------------------------------------------------------------------------------------------------------------------------------------------------------------------------------------------------------------------------------------------------------------------------------------------------------------------------------------------------------------------------------------------------------------------------------------------------------------------------------------------------------------------------------------------------------------------------------------------------------------------------------------------------------------------------------------------------------------------------------------------------------------------------------|
| 13 | NO  | ATGCCAAACTTACCACAACACTATGCTCATCAGATAGAAGACACCAAACAATTACTGCATACACATTTCAACTTAA<br>GAGAACTGGAATATTTCTTGGGAATTGAGTTTCTCAGGTCCAGTCAAGGGATAGTGATGAATCAACGGAAGTATG<br>CTCTAGAGTTGATCTCAGAAGTGGGACTAGCTACTGGAAAGACAATACTCACACCACTAGAAAGCAATATGATAT<br>TGACTAGTGTGGAATATGATGAAGGGGTTGCCACCTATGATGAATTATTTGAAGATGTTGGGAAGTATCAAAGGCT<br>GATAAGTAAGTTGTTATACCTTACAAATCCAGGCCAAACATAGTCTTTGTAGTGCGGTCCTTGAGTCAGCTTATG<br>CAGAAACCAAAGGTGTCACATTGGGATGCAGTGTGAGGGTGATAAGGTATAGAACCACGTAA                                                                                                                                                                                                                                                                                                                                                                                                                                                                                                      |
| 14 | NO  | ATGAATTTCAAGAACTTGACCATTAAGTTTGCCTACAATAACAAGAAACACTTATTGTATGGGAGAACACCTAGA<br>ATAGAGACTATACATGCCAAGTCTTTAGATAAAAATAGACAAGGGAGATGCACAGTTATTCATGATCAGAATTGTGA<br>ATCCAAAAGATACCAATAGTGAGGCTATGTTGCACAATGTGGAGTCTAAACCTGCATTTGTGAATCTAATTCAGGA<br>GTTGTTTGCTGATCCAAAAGGATTACCACCTCAAAGGGACCAATTTGACTACAAAATTTCTTGACAAATAGTAGT<br>AATCCTGTCAACATGAGATCTTATAGGGATATCATTGATGTAGGAGATGTGAGATCAAGGGATGGTGCAGCCTAG                                                                                                                                                                                                                                                                                                                                                                                                                                                                                                                                                                       |
| 15 | yes | ATGCACCTCCGCTATGGAGCTGCTAGATGCCGGTCAACCAATGCTTATCACTCAGCCCAAGGACCCACACTAAG<br>GGTCCGATGACGGTGAAGGATGATGGAGTACAGAAACCCTTTACAGAGAGGCATTTGCTGGAGCCCTAAATATG<br>GATAAGGCACAATCTTCGGCTCCAGTGATAGCAAAACATACGACTCATAATGTTAAGCCGGCAGTCATTTTAAATG<br>CTTCTGATTATTACGGAGTAATAACGGATGAATGTAAATTAACCTTTGGTTGGCAAATTCACGATGGGGAGGCCAAA<br>AATTGAGACCATTAGATCGAAATCTTGGAGCAAACCTCTAAAAGGTAAAGTTCGAATAGGTGCCTATGACTAT<br>CGCCATGTATTTATAGATTTCACTAATGAACTGGATTTTAAATGCTGTTTATTTCAAAAAGATTCATGGATATTGCTGGA<br>TCTCTTATGCACATGTTCAAGTGGTCTCCAGACTTCGACCCCAACGAAGAGACCTCTTTAGCTCCTATCTGGGTAC<br>TATTACCGGAATTGAAATTTCAATTTATTCAAATGGGACTACCTTAAGCAAATACTGGCAGCAGTTGGTACCCCTTTG<br>AAGGAAGATTTGGCAACTATAGGTAATCTAGACCTCATTGGCTAAGGTAAGGGTAGAAGTTGATTTGTTGAAA<br>CCTTTACTGGACTCCATTTGGGTTGGATTAGAAGGAGATGGAGCTGGTAGAAAGGGATATGATCAAAAACCTTGAA<br>TATGAAGGGGTACCTGCATTTGTAGATCTTGCAAGATGCAAGGACACGATTTGGACAAATGTAAAGTGAAGCA<br>AGGAGAAGAGAACAAACAAGAGGCAGAAAAAGAAAAGAAAACAAAGAACTTCAGAGCAATAATACTATAG |
| 16 | NO  | ATGCTCAAAGTGGAGGAAGAGCTTTGGAGAACCAAATCCAGAATGAGTAGGTTGAGTGAGGGAGATGCTAACA<br>CCAAATCTTTTACTACTTCCACTATCAATAGAAAAAGAAGAAACAAAATTTGTAGCCTCAAAGATGATTTTGGCAA<br>CCTCCTCATCAACCATGAGGACATTGCTAAACACATCCACTCCTACGACATTGTTGGTAATAAAAACCTCTAACTTC<br>TTCATAGAGGTCTTCTCCACCAACATGATGCTTGATCACAATGAACTCCACCCTACTTTGCCTCATTCCCAAGTATCT<br>TAATGCTTCCAACATCTGGAATTTTAGGCCATCGGGCTCTGTAACACTGGCTACAAGCTGGTGACAAAATTATT<br>GTCAACAAGATCAAACATTTGCTCTCTCCATCATTGGGCCAACAGGACAGCTTCGTCTCTAATAAGAGTTGTC<br>GACAATGATGTTATTGTCTAA                                                                                                                                                                                                                                                                                                                                                                                                                                                                 |

|    |     |                                                                                                                                                                                                                        |                                                                                                                                                                                                                                                                                                                                                                                                                                                                                                                                                                                                                                                                                                                                                                                                                                                                                                                                                                                                                                                                                                                                                                                                                                                                                                                                                                                                                                                                                                                                                                                                                                                                                                                                               |
|----|-----|------------------------------------------------------------------------------------------------------------------------------------------------------------------------------------------------------------------------|-----------------------------------------------------------------------------------------------------------------------------------------------------------------------------------------------------------------------------------------------------------------------------------------------------------------------------------------------------------------------------------------------------------------------------------------------------------------------------------------------------------------------------------------------------------------------------------------------------------------------------------------------------------------------------------------------------------------------------------------------------------------------------------------------------------------------------------------------------------------------------------------------------------------------------------------------------------------------------------------------------------------------------------------------------------------------------------------------------------------------------------------------------------------------------------------------------------------------------------------------------------------------------------------------------------------------------------------------------------------------------------------------------------------------------------------------------------------------------------------------------------------------------------------------------------------------------------------------------------------------------------------------------------------------------------------------------------------------------------------------|
| 17 | yes |                                                                                                                                                                                                                        | <p>ATGGGGTTTTGGGGATAGATGGATAAAGTGGACCAAGTTTTGTATCACAGCAGTAGAGTATTCAGTGATTGCTAAC<br/> CAAGGGCCTGTGGGATTCTTCTCCCCACAGAAAGGGATCAGACAGGGTGATTCACTTTACCATTCTATTTAATT<br/> TAGCCATGGAAGGTCGTAAAATGCCTGAAAAGGCTAGGCAAATGGGCTGGATCGAGGGTTTCAAGTGTCGGCTC<br/> AAAGAGTGGGATCACAGGCCCATGTGCCTGACCTAGAAGAGCTATCTAGTATTATGGGATGCACTATTGGTTCAC<br/> TTCCTACAACCTATTTAGGTCTTTTCATTGGGGGCGAAATTCAAGAACTGTGAAATTTGGAATGGAATCATAGAGAG<br/> GTTTGAGAAGAGACTTGCATCATGGCAGATTCAATACCTGCCACGGGTGGCAAGTTAACCCATCAACAGTGT<br/> TCTAGATAGCATGCCACATATTTTCATGTTCTATTTCCCATCTCTAAAAAGGTGGAGACTGGAGCATGA</p>                                                                                                                                                                                                                                                                                                                                                                                                                                                                                                                                                                                                                                                                                                                                                                                                                                                                                                                                                                                                                                                                                                                                                              |
| 18 | NO  |                                                                                                                                                                                                                        | <p>ATGCCTGTGGAGCACTCTCGTCTAGAGTCTCTTCTGGGGAAGCGTCAAGAAGGGCACGAATACCCGGCAAAGG<br/> ATCGCTGGAGGCGATTGGGAAGGCTCAATTTGGGCATCAATGCCCTTCTCAGAAGTCAAAGAGATGGGGGAATC<br/> AGAAGTGA</p>                                                                                                                                                                                                                                                                                                                                                                                                                                                                                                                                                                                                                                                                                                                                                                                                                                                                                                                                                                                                                                                                                                                                                                                                                                                                                                                                                                                                                                                                                                                                                                |
| 19 | yes | <p>GO:0003676;<br/> nucleic acid<br/> binding;<br/> Molecular<br/> Function;GO:000<br/> 3677; DNA<br/> binding;<br/> Molecular<br/> Function;GO:001<br/> 5074; DNA<br/> integration;<br/> Biological<br/> Process;</p> | <p>ATGGCGATTGAAGGAGAACCATCGGAAGCTACTGGAGCTAATGTTTCATAGATATGGCCTTGCTGCTAATCCTAGAT<br/> CTATGTTTGATTCCCTTCGATCCGCTGTTTTTACAAAATTCTGATATTCCTGGTGTAATCTAGCTCACTGCGTACTCA<br/> CAGGAATGGAAAATTATACTATCTGGAGTAAATCAATGCGTATTGCCCTGTAGGGAAGAATAAAAATTGGCTTCGT<br/> GGATGGAACCTGCCGGAAGGATATGTATGAAGGTCTAATGGCACAACAATGGGAACGAGTGAATGCAGTAGTGC<br/> TATCCTGGATCATTAAATGCAGTCTCAAAGGATCTCGTAAATGGAATAGTGTATTCTTCGAATGCTCATAAAGTTTGG<br/> GCAGATCTTCAGGAGCGATTTGATAAAGTGAATGCCACGAAAATTTATCATGTTTCATCGAGGAATTGCAACACTC<br/> ACCCAAGGTACATCTTCTATTTTCAGTCTATTTTTCCAAGTTGAGGGAGCTTTGGGAAGAGTATGAATCTCTAGTAG<br/> CACTTCCTTCGTGTTTCATGTGATAAGTCACGAGATTTTATCTCCAATCTGGAACAACA AAAAGCTTATGCAGTTTCT<br/> AGGTGGTTTTAAATGAAACATATAATCAATCAAGAAGCCAAATATTGATGATGCCTAGCATACTTCTGTAAACCAA<br/> GCTTATCCCTTATTATTCATGAAGAGAGTCAAAGAGCACATTTGAGTGCAATTGCACAGACTTCTCATCTCAGAC<br/> CACACTATGAAGAAGGTGAATCCTCTGCATTAGCTGCTACTGTCATGAAATCTACTCCTTACTCCAAAGGAAAATC<br/> AGTAATGGCATCCCACTATGAGGATGGTGGATATAGAGATTCTGGAACCTCGGGTGGCTATAGAGATTCTGGAAAC<br/> TCAAGTGGATATAGAGGTACAAATGGTCAAGGTACAAATGGTTACAGGTCTGGTGGATACAGGGCGCATAATGCT<br/> AATCTGAGTAATCACTCTGGTGATTTTGGAGCAACAACAAGGTTTAGGATTCACAACAGAACAGTTTCAGAAACTT<br/> CTCAATTTGATTGATAAGCAAGATTTCCCTGAGAATGTGGCTAACATGGCAGTTTCATCCTTGGACTTAATGTCATC<br/> TAGTTCTCTACTTCCACCTTCTCCTCAAATCAAGTTCACTTACCAAATGGTGCTATGGCTCAGATTACTCATAAAG<br/> GAACTTGTGATTAGCCAAAGATCAGTTCCTTACAGATGATCTTTACTGGCAAGGTGATGGGAATTGGTAAAG<br/> TCAAAAATGGACTATACATTCTCTCAACCAATTCACCATTATCTCCACAACATCAAATCTGAAAAATGCTTCTGTT<br/> TGTTTTTCCACTCAATCTGCCTCTATCAAGAGTTCTATATGGCATCAAATGCTTGGCCATGCTCCATTTCTAGTCATT<br/> CTTTTCAATTGGTGCACATGGATGTATGGGGTCTTATAAGCATAACACATACAATGGAAATAAATACTTTCTTACT<br/> CTTGTGGATGATTTTCAGTCGAATGA</p> |
| 20 | NO  |                                                                                                                                                                                                                        | <p>ATGCCTTTGAAGGATGATCACAAAGGTCCATATAGAGGTAGTCATCATCATCACTTGCATACTTCAGAACGATTATG<br/> GTCATGCAAATAAAGAGGAACTCTTAGCAACAAGATTTTTTCATGCCTTTCCCTATTCTTATTAGCAAGTTGTGTGC<br/> TCTAGAGGAGATAACCATATTTTGGAGTTGGACAAAGTTTGCCTGCTATTGGGGTAATTGATATTGAGAGGAAGCAG<br/> GATGTTGAGGCTCCTATAAACAAAAAGAAAAGAACGCAAATATGGGAGTGTTTTATAATTCCCCTGCTCAGGAT<br/> GTAAGTTAG</p>                                                                                                                                                                                                                                                                                                                                                                                                                                                                                                                                                                                                                                                                                                                                                                                                                                                                                                                                                                                                                                                                                                                                                                                                                                                                                                                                                                                     |

|    |     |                                                                                                                                                                                                                                                                                                                                                                                                                                                                                                                                                                                                                                                                                      |
|----|-----|--------------------------------------------------------------------------------------------------------------------------------------------------------------------------------------------------------------------------------------------------------------------------------------------------------------------------------------------------------------------------------------------------------------------------------------------------------------------------------------------------------------------------------------------------------------------------------------------------------------------------------------------------------------------------------------|
| 21 | yes | ATGGAACCTGAATTCTCCGATGATACTCAATTTCCATCAAATTTAGTGCAAGATTCAATCTTGACAATTCCTGTTCT<br>GCCACCAGAACTGATCACTGAAATTGTCTTGAAGCTTCCAGCTATTGAAATGGATTTTTCCATTGAAAATGACATT<br>CATGGGCTCTATGCTATGGGTTCTTGCAATGGATTGGTTTATCTTGCCCGTTCTTGTGAAGGATATCCCTTTTGTG<br>GAATCCTTCAACTAGAAAGCACAAGGATTTGCCTCTTTTTAGACAGAGATCGGAAAAACACAAATGTGTTGCATA<br>TGGTTTTGGATATGATGAACTCCATGATGATTATAAGATAGTGCTTATTTCTTAA                                                                                                                                                                                                                                                                                              |
| 22 | NO  | ATGAAGGAGAATAACAAAAGTAGGGAAGAACCACCTTCTGAAGAAGTTTCACACATGCAGCAGTGCGAGACGA<br>CACAACTACTGAAAATAAATCGCAGAATCTGAATCAGACTGAGAAGGATGGAACAGACATAACAAGTACAACAG<br>ATTTTTGAGGCAGAACCAGTGGCAATTCAGAACTCAGCAGATCTTGAAACAGTTGAAACAGAGGCATCAAGCTG<br>GGTGAATTCCCACATTCTAGATTCAAGCAATACTTATGGAGTAGCTTTTGAGGGTTTCAAATCTAAAACCTTTGTCT<br>CTCCTCGTGAGAATTGACGAGAGAAAAGTTGCACTGGACAACAAGGAGATGAGGAAAGCAAATGTGACACCTT<br>AG                                                                                                                                                                                                                                                                            |
| 23 | NO  | ATGTATAAACTGTTCCCTGGTAGTTTTTCTCACTGTGATAATTCTGGTTTTCCCTCCTACTTCCCCTATTTTCTCTGAA<br>TCTTCTCTCCAATCTATCCTTCTGCTTCTCTCTTCTCCTGTTGCAGATTCATCACCTCAATCTCCTACACCTTTCAGT<br>TCATCTACTATGTCTATCCCTTCTTCAAGCACTAGTCCTTCTACTTCTGATGCACCTATACTTTCCACAGGATGA<br>AGTATTGCCACTAGCAGCAGAAGTGTCTCCACGCAGGTCACAAAGACAACATGTGAAACCTAGGTATTTGTCAG<br>ATTATATTTGTGCACTAGCTTTCTCTGTGATCTCGCTTAATCCTCTTATTCATCCATATTATCAGTCGTCTTTTTATGC<br>TTTAACTCCTTCTAATCAGACAACCTATTAGTTCCATTTGTCAAATTAAGTGAACATACTTCTTATCGACAAGCATTGA<br>TGAATCCTGGTTGGAAAGCTGCAATGGAGTCAGAATTACAAGCCTTGAACCTCAATCACACTGGGACCTGGTC<br>AAATTGCCTGCAAATAAGAAACCTTTAGCTTGTAAGTAG                                                         |
| 24 | NO  | ATGAGCCTAATAGTATGGAAGTGTAGAGGGCGCCAATGGACTCGAATTCAGAAGGAACTTTAGGGCCCTCGTTGAT<br>TGGCACAAGTCTCCTTTAGTTGCACTTCTTGAAACCAAGATGCAACATCATCAAATCTTGCTTGATAACTTCCCTT<br>TCAACAAAATGATTGAAGTTCCTGCTATGGGGAACCTCGGGTGGCATTGTTGTCCTATGGGATGATAACCTTCTGGA<br>ACTCGATGAAATCGCCACCATTGGTTCAGGAAATTCATGCCATGATCAAGACCAACCTTAGCATCCATGACCCCGTT<br>GCCATGATCAGAAACAAAGATAGTGCCAACCTGGCTATATGATCTCGACAATATCAATGCTAACGTCTTCAATGTTG<br>AATGGGGGGCAGCCTTCCCATTCTTCTTTGGAACATTTGGCTAAATAGAAATAATAATCTTTATCGGAATACGCG<br>AAGCGAAATCTCCATGTCTCTCCCTATATCCAGAACCCTGGAGTTCATACATTTAGGTCAAGGAGACTTGAGCACT<br>TCGCCAAAACCATCAGTAAACCCCTTATGGTAGTTGGACCCCTTACTAGTCGCTTTAAGCTTAACATAGATG<br>GTTCTTTAATGCGAATACATGA |

|    |     |                                                                                                                                                                                                                                                                                                                                                                                                                                                                                                                                                                                                                                                                                                                                                                                                                                                                                                                                                                                                                                                                                                                                                                                                                                                                                                                          |
|----|-----|--------------------------------------------------------------------------------------------------------------------------------------------------------------------------------------------------------------------------------------------------------------------------------------------------------------------------------------------------------------------------------------------------------------------------------------------------------------------------------------------------------------------------------------------------------------------------------------------------------------------------------------------------------------------------------------------------------------------------------------------------------------------------------------------------------------------------------------------------------------------------------------------------------------------------------------------------------------------------------------------------------------------------------------------------------------------------------------------------------------------------------------------------------------------------------------------------------------------------------------------------------------------------------------------------------------------------|
| 25 | yes | <p>ATGCTCTCCCTCGAGTTTTCTCTTCCAGAAGAATTCGAGAATTCAAACTCTCCTGCGAAGTCTGCAGCGAAAAA<br/>CTCCTTCCTGCTTATTGGGTTTATCATTGTGGTCCTTGCAGATACTTTGTACACGTCAAATGCGCCGGGAAAAAGA<br/>GAATGGCAGCTGATGATAACATCGAGGCCTTTCTAAGTTGAACTTGGCCCTGCTGCCAGAGGCTAATGAACTG<br/>TGCAACTTATAGTAAGGTTTTCTTAATCAAACGGCATTTTAGAAAATCTAATGCCATTGCAGATTGACAATTTTCAA<br/>CACAAGATGCATTTCGTTAGTTCTTTCAAATAACACAAACAAGGATAAATTAGTCTGTGATGGCTGTGTTGGGCCTA<br/>TTGTTGACCGGCGGTATTATAGTTGTCAACAGTGCAGTTACTTTCTACATATAACTTGCTCTCAGTTACCGGGTGT<br/>CTGGAGCTGTATCATCCATTTACCCGGAACATCCACTTTACATAAGGCATCCAGAGTATTGCTGTTTTCTCCGGC<br/>AATGCAGTCATTGTAAATTAGACTAACGGTTGGTGGTTTGAATGCACAGAGAGAGATTGTGTCTCCGCCTTG<br/>ATATGAAGTGTGCTTTTATACCTAAAGCTATTGCTCATAGATCACATAGGCACCCCTTTGTCGAATTCAGTTTCC<br/>AATGTTGATTGCAGTGCTTGTGGCAGACGCCTCTCTGGTTCGTCATACGGTTGTAAAGCCTGTGGTTTTCTACCTAG<br/>GAAATGATTGTGCTCTATTGCCGGCAACTACCACCCACAAATGGGATGAACACCCACTTACCCTCATTTTCCCCC<br/>TTTCACTGACCATCCAGATGAATTCTTGTGTGAGATCTGTGAAACATTTGCACATCCCAAGTATTGGCTCTATCATT<br/>GTAGGGAATGTGATCAATCTTTTCATCCACATTGCATCCCTCGACATGGTATGTCTCGCAATATCAAGTTTGGTAGC<br/>ACCATCCAAATTGCTGAGCACTACTAAAATTAGTCGAAAAAGGTGAATTTAAGTCCCAGTGTGGTGTATGTGCA<br/>AATCATTGTATGAGACAGAAGCCCTGCTCTGCACAGCTTGAATTTGCATATTTGCCGCAATGTATTTGTGTCAA<br/>TCTGAAAAAGGACGATACAGCAATTATATCGCCTTGCAGTAAAACCTTTGGGGATTCTTAA</p> |
| 26 | yes | <p>ATGATGAAATTGGCTTTGCTGTTTCGTGAATTACCCGAGAAATTGTCAATTGTGCCTAATTTAATATCCTATAACGT<br/>CGCGATGAAGCCGTTGTGCAAGGCTGGTTCTGTGTATTCTGCTGTGCTTTTGATGGATGAGATTGAAAAGCATGG<br/>GATTAAGCCGGATATTGTGACTTGTAAATACATTGTAAAAGCACTTTGTGATAGTAAAAGGTTTTCTGAGGCTGAA<br/>AACTTGTGGATTATGATGGAAAAGAGAAATATTCTTCTGAAAACTGA</p>                                                                                                                                                                                                                                                                                                                                                                                                                                                                                                                                                                                                                                                                                                                                                                                                                                                                                                                                                                                                                |
| 27 | NO  | <p>ATGGGGGGACTGCTTGTATCCCATGAATATGAAGACTTTGCTTGTGTGTTAATTCATGTGAGTTGTATGACCT<br/>TAATTTCTCTAGGAATCCTTTTACTTGGTGGTATGGAAGGATGAATGGAGACTGTATCTTCAAAGACTAGACAAG<br/>GTTGTGGCTAATAATTTATTTTCAAGGATATCTTTGGAAGTACTGATTTACAACATTTGGCTAGAACGGGTTCAAACCA<br/>TGCCCCACTATTTCAAACCTTGTAGGATTAGCAATCTGACAATAGCTAAGCCTTTTAGGTTTTTGAAGTTTTGGATTG<br/>AAAGGGAGGATTTCAAGGAGGTTGTTCAACAAAGTTGGGTGGCAGACAACTCTGTTGATTTTTTTTTTACAGTTGA<br/>AGCAAAAGCGAAAGAGCACAAAGTTGGCTTTAGCCAAATGGAGTAAAGAAAAGTTTGGTGTATTTTTCAAGCAG<br/>TTAATTATTAGAGAAGAAATTGTGAAAATCAAGGAAGATCTATTTCAAGAAGAACCTTCTCCTATTAATAGAGCAG<br/>TATTAATCAGGCCCATACAAAATTATAA</p>                                                                                                                                                                                                                                                                                                                                                                                                                                                                                                                                                                                                                                                                                                |
| 28 | NO  | <p>ATGAGGTGGTTTAAAGACGGAGACAGAAACACAAAGTTCTTCCATGCATATGTGAAAGGGATAAGGAGGAAGTT<br/>AAACATTACAGAAATTAGAATGAGGCAGGGGACATTATAACATCTCCACAGAACATTGGGGAGGAAGCTGTCA<br/>ACGTCTTCAAAGAGCAGTTCCAGGAAACACATGAAATTACAGATTTTCAATGCTCCAGTGTATTCCAAATCTTGT<br/>CACAGACGAACAGAATCATGAAATTGAGAGGATGCCGACAAAAGAAAAAGTAAAACATGTGGTTTTTAACTTAT<br/>GGAGATAG</p>                                                                                                                                                                                                                                                                                                                                                                                                                                                                                                                                                                                                                                                                                                                                                                                                                                                                                                                                                                              |

29 NO ATGGTGTGTTTTGAGTGTTCCTTGTACGAGCACATTCGTAAAGTTTGTGGGCACGTTCCAGGCTTGGATTGTGTCT  
ATTATCGGGGAACAACACCCTTGCATAGGGTAGGACCTCCTGACGAATCAACTTTGTGGCTCTCTGCATGGATTG  
GCATCGCTCGGAGGTTCTTTAGAAGGGAAAAGTGTGCGAGTTATAGTTTGTGGTTTTCCGCCTAGAGCATCT  
TCTGACTGCTTTTACTCTTGTGAGCTCGATGTGCCATACGGGGCAGCCTGTTAATTTAGGTCCGAGCTACAACTA  
TCTTTTTCTTATACATTGTTGATAAACTCGATGTATACCCCCGACAACCTCGTTGATATACATATTTGGGTTATTGTT  
AAGCTTGACGTGCCATCGCGGGCGGCCCGTAGATACATCTATCTTAATCTTTTTTCATTGATAAGTTTGTAGGTATCA  
TTCCAGTTGGCTCGATGTCCCTCCGAGCTTCTATTCTCGCTTACTTGGTGTTTTATATTGTATCATAATGAGAATTG  
A

30 NO ATGGAATGGTTCAAAGAAGGAGAAAAGAAACACTAAGTTCTTTCACACCATAATAAAAGGGAGACGAAGCAGAAT  
GAGGATAAACAGAGTACAACTGAGCAAGGGGAATGGTTAGAAGAACAAGAGGCGATTGCGGAGACAGCAATA  
GACTTTTACATAAGACAGTTCACAAAGCAAACATATAGTGAAGATTTTGTAGATGCTAAATGAACTGCCTATTGTGA  
TAAATGATGACAAAAATAAAGAATTACAAAGATTGCCATCAATAGAAGAAGTCAGAAGCGCGGTTATGGGGTTGA  
ATAAGAACAGTGCAGGAGGTCCAGATGGTATGACTGGAGCTTTTTTTCAACAGACGTGGGAGATAGTAGGAAAT  
GATATTCATAACATGGTGAAGGCCTTCTTTTGTGGTGCTGAATTGCCAAGATATATCACACACACTAACTTAGTCCT  
TCTGCCTAAGAAGAGTGTGATAAATATTTTTTTCAGATTTAAGGCCTATTTCTTTGAGTAACTTCATGAACAAGGTTT  
TTTCACGAATTATTCATAAGAGAATCAAATCAGTGCTGCCATTGATTATATCACCTGAATAA

31 NO ATGTTGGATACGAGTGGGAAATTCAGTGTAAAATCAGCTTGGAACTATATCAGACATAAAGAAGTTCCGAATAGA  
GTTTACAAATGGATATGGACTAAAGGGTCCCTTTTCGAAATGACCTTTTCGATGTGGAGGCTATGGAAATTCAGA  
TCCCAGTAGATGATAGATTGAGAAGGTGGGGAATTGAGGGGCCATCGAGGTGTTGGTGTGTTGTGAACAGCCTGATC  
AGGAGACATTGGCCCATGTCTTTCTCAAATCAGATTTTGTCTAATAGGACTTGGTCCTATTTCTATTCTTTTGCAGGT  
TTTAAACATAACAAGATTACCATTGAGAGAGGTGATAATGTTGTGGTGGGAGAAAGTAGCAAACAAAGCTTGAA  
GCCTTATTATAGAGCACTTCCTAGCTTTATAATATGGGAACTACGGAAGAGGAGGAATAAGAGGAAGCACGAAGG  
AAAGAATACATCATTACAAAGAATCATTACATAATGTTACTAAAAGTATGTACATGTTGATAAAAAGTGAGAAGGCCA  
AGGATGAAAGTAGCAGGCAGATGGCCAGATATGCTAAAACAACCTGGAGACAACAGGCTCACAGATGAAGATAAC  
CAAGGTAAGTTGGGATTACCCCCCTGAGGGATGGGTAAAATACAACACAGATGGCGCGTCTAGGGGGAGTAAGT  
TCATATGGATATTGTTTAAAGGATGA



|    |     |                                                                                                                                                                                         |                                                                                                                                                                                                                                                                                                                                                                                                                                                                                                                                                                                                                                                                                                                                                                                                                                                                                                                                                                                                                                                                                                                                                                                                                                                                                                                                                                                                                                                                                                                                                                                                                                                                                                                                                  |
|----|-----|-----------------------------------------------------------------------------------------------------------------------------------------------------------------------------------------|--------------------------------------------------------------------------------------------------------------------------------------------------------------------------------------------------------------------------------------------------------------------------------------------------------------------------------------------------------------------------------------------------------------------------------------------------------------------------------------------------------------------------------------------------------------------------------------------------------------------------------------------------------------------------------------------------------------------------------------------------------------------------------------------------------------------------------------------------------------------------------------------------------------------------------------------------------------------------------------------------------------------------------------------------------------------------------------------------------------------------------------------------------------------------------------------------------------------------------------------------------------------------------------------------------------------------------------------------------------------------------------------------------------------------------------------------------------------------------------------------------------------------------------------------------------------------------------------------------------------------------------------------------------------------------------------------------------------------------------------------|
| 32 | yes | GO:0003676;<br>nucleic acid<br>binding;<br>Molecular<br>Function;GO:000<br>3677; DNA<br>binding;<br>Molecular<br>Function;GO:001<br>5074; DNA<br>integration;<br>Biological<br>Process; | ATGCCAGACCCTCTTCTTGATTCTTCTATGACTGATGAAATGTTGGCTGAGGAGCTTCAAACCTTGAGGTCATGC<br>ATTCGTCCAGTATTTCTTACCACGCTATGGCCGGGGGTGACACTGTTTCTGCTCTCCATTTTACTAGTTATATTCAG<br>GGCCCATCGGTGCATGTCATGCTCGATAACGGCAGCACACACAACCTTTATTCAAACCTCGTGTGGCTAATTTCTTC<br>ACCTGACCGTAGAGACCATTGCTCCGTTCTCAGTTATGGTCGGCAGTGGGCAACGCTACCATGTAATGGAATTG<br>TCCGACAAGTTTCATTAATGATTCAAGGGTGTCTTCTCACTATGGACTTCTTTGTCCTACCGATGCATGGTTCAGAT<br>ATTGCCTTAGAGGTTTCTTGGCTAGCTACTTTAGGTCGTGTTGTTACTGATTATGGTCAGCGGATATTTGAATTTGA<br>GTTAAATGGGCAAAAATTCAATTGGAGAGGTGAGTCATCTATTAATATCCAACCGTCCAGCTTCAATGTTTACGA<br>CACTTATGTGCTACTGATGTTATTGCCACCTACTATCATTGCAATTAATTGGGGCTACACCTTCAAATCTCCTGA<br>GACTACTCCTCTTGCATATCTGCTTTATTGGACTCCTTCGAGGACGTTTTTACTAAATCGCAGGGACTTCCGCCTA<br>CCCATCTTCAAGACCATGCTATTTATTTGGCTCCAGCCACAGGGCATGTTAATACCCTTATTGCTCAGGCTGCCTTC<br>GAGAATCTTAAGAGTTGTCTCAGTTCTACACCAGTATTAGCTTTGCTTGACTTCAGTCAATCGTTTCAGGTTGAAA<br>TTGATGCATCTGGGAAGGGCATTGGGGAGGTTCTCTCTCAAAAAGGACATCTAATTGCTTATTTACGCCAAAAGT<br>TATGTCCTAGGATGCAACAAGCTTCTACTTATGTGCGCGAAATGTTGGCTATTACTGAAGATGTTAGCAAATGGCG<br>TCAATATCTATTGGGTAGATGGTTTATCATCATTACTGACCAGCAGGCTCTTAAGAATCTCACCAATCAAGGACTTC<br>GTGATAATCCTGCAGCATATCCCGGTTATTTGTATCGAAGAAGGCTCTTGTCTTTAAAGGGCGCTTGGTACTACCT<br>GCTGATTCATCACCTCACCTCCACCTTCTCAATGAGTTCACCTCATCACCTGTTGGGGGTCAATCAAGCATTGCTC<br>GTACCTTTCATCGTTTATCTTCCAATTTTTATTGGAAAAATATATGTCATGACGTCAGGTGTTACATCCTCTTGTC<br>AGATTTGCCAGCAAATGAAGGACCACCATCATCCTGCGGGCCTTTTACAGCCTCTCCCAATTTCCCGAGCAGG<br>TATTCGAGGAGATCACAATGGATTTTGTGACTTGCATGCCCCCGTCTCGCGGTAATAATGACTATCATGACTGTAGT<br>CGATAGATTGTCAAATATGGCCACTTCGTACCACTACCTGCCACTTTCACGGCTTTAACTGTTGCTGAAGCTTTT<br>GTGGCCCATATTCTCAAACCTTACGATCCTTCAAAGTCCATTGTCACTGATCGTGATCCTCGTTTCTACATGTGT<br>CTGA |
| 33 | NO  |                                                                                                                                                                                         | ATGTGTGGTATGGGAGAACTGGTGAGTCGGAAATCCCTCAAACCTAAAGTCTTGGCCTCTGCGGCTGTAGAATC<br>TTTCTACTTGTCTTCTCAAATGAAGTTGCCACGTCCTTACCTACTCTTGTACGCTCTCCCTCTCCAAGTAAATC<br>TCAAGATGCCTCAAATAACTCAGAGGCACCGTTTGTGCTCAAACCTCCTACAAATGCCAATCTATCTGACGTAGAT<br>GTCACTTACAATTAGGCCCATATCCTCCACCATGTCTGAACGAGTGTAAATGGAAATCTACTAGTAAGGAAAG<br>AGACTGAATCCAACATTTTTGCAGCCAGTGATGAATGGGTTGTTAG                                                                                                                                                                                                                                                                                                                                                                                                                                                                                                                                                                                                                                                                                                                                                                                                                                                                                                                                                                                                                                                                                                                                                                                                                                                                                                                                                                          |
| 34 | NO  | GO:0003676;<br>nucleic acid<br>binding;<br>Molecular<br>Function;                                                                                                                       | ATGGGGTATCTGATTTTTGCTTATTCCTTGAGGTTAGGTCAAGGCTCTAGTAATTGGGCAGAGGCCAAGGCACTAT<br>TGTTTGGTGTGAACTGGTGCATTGACAATGGTTATGATATAATCCTTACAGAAAGTAACTCTAAGCTTTTGGTTGA<br>ATGTGTTAATGATCTCAACCAAACCTTGGAGAATTCTTAAAGAAGTATCTAACTTGAAAGTCCAGATGGAAAAT<br>ATAGGTTTCATTCTCCAACACTGTTATAGAGAGGCCAAACAAAGTAGCCGACAATCTAGTTTCTTTAAGTTTTGTAG<br>AACCTACAATCAGACATATGAAGCCTTTGTTGACCTGCCCGCCGAAGCAAGAGGCCTTATGACTATGGACAGAT<br>AG                                                                                                                                                                                                                                                                                                                                                                                                                                                                                                                                                                                                                                                                                                                                                                                                                                                                                                                                                                                                                                                                                                                                                                                                                                                                                                                                  |

35 NO ATGGAACATGCAGACATCTGGGAAGTGGTGTCTTTCCCCAGGAAAAGGAACGATGCAGCGCGAAAAGAAAATG  
CAGGCGCATCCAAAGATTCAGTAGGACAACAACAAAGGCAGGTAAGGGCTTATAACCTTTACGCAGGGGCCACA  
ACTCTAAATACTAAGGCCAACACCACAGCTGTAAAAAGCACAAATAATGTTAAACATCAGCTTTTTACAACCATC  
AATGAAGAGAGACAAAATCCCAAGAGGGATAATGGTCTCTCAGTCAGTAATCACGCGGATCTAAATCCCAAAGG  
AAACCTTGGGTCCCAGGGTTTAATGCCTAACACCCTCTTACCTTCCCTAATGCTCTGACGATCCAAATCACCGCC  
GCAGCTCAGGCTAAGGAGATGTGCATCTTGGAGACACTCTTCTTCAAGGAGTTCGAGGAGCCCATCAGCACGAC  
AATGTTAGCTTACTGCCTACAGGAGATGAAAATATGCACTTTGAACCTGAGGAACAAGAAGGAACTCAGTCCTG  
CAGCAGTGGTACTAAACCCCATTTGGAATACCCAAGCAGAGATTTTCGAGCGGAGAAAGAGAAAGGGAAAGGGCTT  
GCAGGAGAAAGCAACACCCTCGTCTTAATGATGAACTATATCATATAG

36 NO ATGGCTCAAAGCCCACACCTCATCTATTTCCACCAAAGTACCTCCGACCTCCAACCTAGCACAGTTACCGAGTAAT  
CCTGCTCACCAAGATATCAGTGTTCTTCTTGGAGTTTGTATCACCTCCGGCCAGCACACAGATTCAGAACAGGAG  
AAGTGCTACAAGAAGGGAAGGGAAGAAGACTTGTGTTGGGTACCTAGAAGTGCTGATGCTACTCTTCCTTTGCA  
ACTACCAGATTTGCAAATCAAGCAGTTTTTGGTTTTTTAG

37 NO ATGGCATCAGAGAACTTAGTTCAACCTTCCATCCCTCATTTTGATGGTCATTATGACCATTGGTGTATGTTGATGGA  
AACTTTTTGAAATCAAAGAAATACTGGCAAGTAGTTTCAGAAGGTATACAACAATTGGAAGCTGGTGAACAG  
AAGCGCGGAAGGTAGAGATAGAAGCAGTGAAATTGAAAGATCTAAAAGCAAAAAACTATTTGTTTCAGGCTATA  
GATCGTTCAATCTTGGAGACAATTCTTTGCAAAGACACCTCCAAGCACATATGGGATTCAATGAGAAGGAAATAT  
CAAGGATATGCCAAGACTAAAAGACAACAACCTTCAGGCACTTCACACTGAATTTGAGACATTGAAAATGAAGTC  
TGGAGAATCAATTACAGATTACTTCTCAAGTCTCAAGAGTAATGACCATTGTCAGCAAGATGAGGCTACACGGTG  
A

38 NO ATGTTGTCTTTGAAGATACGGATATTGAGAGAAGATCTTATCAATGCGTCAAGAGAACCAGATATGAGTGTGATTG  
AGTCTGAGGACATTGTAACGGTAGTCACCAAAGAAGAAAAGAGGTAGAAGGAAAGATTGAACTGCTCGAAGA  
TGGGACTATTGATACAAGGGTGCAAGAGGTAGAGATTCATTTGAGTGAGGATACTCTGAGCATCATCCTGGATGT  
TTCGTGCAAAGGGATTAGGTCAATAGATAGATGTGCGCCATTGGATGAGTATATTCAAAGGTAGACAAATTTGAA  
GGTCTTAAGTGTCTGGGGTTCCCAAGAAATATCTGAAAGGAGATCACCAACTGTACTTTGAATTTGTCAACAAA  
GTATTGCTACCTTGCACTGAGAAAAGAATAGTTGCATCATTAGCAGACCTTTTTTCTTATGGAAATCTTGACAAATA  
TGATGCCATTAACCTTCCCGGTATCATGTTGGAACAAATGCACAGGATCATAATAGTCAAGGATAGAAAACCTGGA  
ATGACTTATGGGTACTTGCTGAACAAAGTGTCTACCATTTCAACGTGCCTGTTGGAAAATGA

39 NO

ATGGTGTGGAGAAGAAACAAGTATAAAAGGGATAAATCAGGGCGAATTGAAGGGGAAATTGAGTACAAAGATGA  
AAACGCTTTTGAGGCACTAAGAGAAGAGAAAGAACGGGACAAAGACGATAGTAATGAAGAAAGGGCTTTAACA  
GAAAGTACAAAGGAATGGGTAAAAAACATTTGAAAGTAAAAATAAAGGAGAGGCAGAGAACAAGAAAGAA  
ACAGGCAAGGGCGCAAATGAAAATGACGCCAATAGAAAAGAAGAGGTGAATAAGGAAAGCAAACAGATCCAA  
AGCCCAAACAAGAGAAGATAGAAAAGCAAGAGGAAAACAACAAAAAAGGGGTAATAGAGTGGTTCAAGTA  
GAACAGAACGAAGGGACAATTATAGTATATGGCATGGACAACGAAGAAGTATTACCACTAGCTATCCATAACGGG  
TATGAAGGCAGCATGGAGAATCACGAAGGTAGTATGGATAAGGTGGATATGCACCATAAAATCAGCAAAGTGGCT  
ATAGAAGGAGATTTATCACCTACACAGGTTGAGAAGATGAAGGACAAGGTGGCCAAAAAGAAGAATCAAGGGG  
AAAAGGATAATGTTGGGGCGCAAGCATCATCTAGGCAATCCAAGAGAACAATTATAAAAAATTCTAAGAGGTTGG  
GGATGCAACATGTTGTGGTCAATAATAATGGGAAGATATGGATCTTCATTGATGAAGTCATGGAGTATGAGGTAAT  
TAGGGATGAAGACCAAATGTAACTGTAAGGGTGAGAAATAGAGAAATGAGCATTGAGGTAATGATCTCAATGGT  
CTATGCCAAATGCACGCAAGGAGAGAGACTTCAGCTATGGGAGTCATTGTACGAATTGGCTATGACAAGTAACAC  
ACCTTGGTTAGTAGGAGGAGATTTTAATGTTATTAGTAATTCGAAGAGAAATTAGGGGGCAGAGCAGTCACAGA  
GGCAGAGGTAAGGGACTTTAATCACTGCCTGAATGTGTGTAATTTGGAGGATCGAGGATTCAAGGGGAGTAAATA  
CACTTGGTGGAAATGGCAGAACTGATGAGGACTGCATATTCAAACGACTGGATAGAGTATTGAGTAATGACTTACT  
CCAGGAAGTATTTCCAGTCTAGAAAGTAGAACACTTAGTGAGGAGTGGATATGATCATGCTCTTTTGGCTATTAAT  
TTTGACACGAAAAAGAAGAAGTGATTAACCATTTTCGCTTCTTGAACTTTTGGGTGATGGAAGATTCTTTTTTG  
GAAGTGATTCAAACAATTGGAATGCGGATTTTGAAGGTGACCCTTTTAGTTTATTCCATCATAAACTAAAAAAG  
TCAAAAAGGCGTTAACCCAGTGGAGTAAAATGACTTTCGGAAATATTTTCCAAGAAATTGCCACATTAGAGGAAG  
TTATTAAGGTTACGAAGCACAGTTTGAGTTGATCCCCTCTGCCAGCAATAGAGCAAGGCTACATAAAGCTCAAG  
CGGATTTGAAGACACAACCTAACAGAGAAGAAGATTTCTGGAGGCAAAAAGCAGGTATGGATTGGTTCAATGAA  
GGAGAAAGAAACACTAAATTTTTTCACTATTGTAAAAGGTAGAAGGAGGAGACTAAGGGTGAACAAGATTCA  
AAATAAGGAAGGGGAGTGGATAGAGCAGCAAGGGCAGATTGCAGATGCAGCAGTGGAGTTTTACAAGAAGCAA  
TTCATAAACAATAACCAGTGAAGAGTTTGAATGTTAGATGAACTACCAGTGGTAATTACTAGTGACATGAAT  
GACAACTACAAGAAATGCCATCGCTAAAGGAAGTCAGGGAAGCAGTCATGGGCTTAAATAAGAACAGTGCGG  
GTGGTCCAGATGGGATGACAGAGGCTTTCTATCAAACCGCATGGGATATAATCGGAGAGGATATTCACATGATGGT  
TAAAGCCTTCATATGTGGAGCTGAACTACCGAGGTATATCACACACAACTTAGTTCTTTTACCTAAGAAGGGT  
GGAATGGTTGTTTCTGACAAAGGTGCTAAGAAGAATAGGATTCAGAGATAG

40 NO

ATGATTTATCAGATGAATAGCCTTCCCGGATCGTTAGATGTTAGAGTTGCACGGGTTTCAGACATATATGCCATGAT  
CATTGATAGAGCTACTGAGAAATCCTTCGCTACATTGCGTGACAAGGTGAGTAGGTGTGAAGGATTGGTTGAGAG  
CAATGATGTGAGGTTTTACCACCTCTCTGCTAAACTTGAGGCCTAA

41      yes      ATGCAGCAGGTCATGAATACAGATCAAAGGAATTGTGATAGTAAACAATGAGCCAATACCTGAAGTAGCAGTAGAG  
GGAAATAATGGTAATGTAGAAGGGCTCTTGGGAGATATGGCTGAGGCTCAACAGGGTCACATGTGCAGGGGTAA  
AGTTGACAAAATGGGTGATACATGTAGAAAGGAACCACATGAATATGATGATGAAGAGTTGAAGAACCAAGTTG  
AGATGAAAGATACATCGACAACACATGGTAGAGAAGAGAATGAAGATAGTCAATCACTCGCTATAATACCTGCAG  
CTGCACAAAAATCTGAGATGGAAGTACTGATGAGCGAGTTGGCAAGTGCTGAATACCATGAACCTTTACAAA  
TAACTGGTGTATCAGATGGTGAAGTAAACAAGAACATTCAAGACCACCAGGAGCCGCTGGAGTTAGAAAATAAC  
AAAGCTGAATCAACATTAGCATCTGTTATTGCTGGAAAATCTGCTCCAATGGACAGGCTATATGAATTGATTTAC  
ATAAATGCCTGAACAAGGACCCTGCAATCATAGCAAAAAGAAGTCATACTATCAGAAAAGAGTATAGGTGTAGAGG  
ATAATGAAGAAGAAAAAATGACACAAATATGCACAACATCTGTAAAGAGGCTGGGCTATCACCAAAGGTGTAC  
TCAAGAGGGAGAAAAGGCAAGGGCAAAGGAGAGACAAGTATTGCAGTGCCTACAGGAGTTCAGACTAGGAGG  
GGAATTTGGGTGTTTGTAAATAACCATATTCAAGTGGGGTGGTGAAGACTCTGACCAACAGTTGACTCTACAT  
CTCACATTAGAAGATGGTAATCAGATCTTAGCTACTGTGGTCTATGCTAAATGCTCTAGCATTGAAAGATTAAGCCT  
TTGGGAAGAGCTTTCTCAATAAGTCAGAATCTTACAATGCCTTGGATGGTAGGTGGTGAATTTCAATGTGATCCTA  
GGGGATGAAGAAAAGATTGGTGGTCTACCTGTTTATCCACAGGAATATGAGGATTTTGCCTGGTGTCTTAATTCAT  
GTGATTTATCAGATGTTTATTCTCTGGAAATCCTTTTACTTGGTGAATGGTAGAGTAGATGAAGAATGTATTTTC  
AAGAGATTAGATAGGGTTGTGATTAACCAACTATTTCTGTAATTGTATGGTAATTCTGGACTACAACACTTAGCTA  
GAACAGGATCTGATCATGCCCTTTACTCCTTACTTGTGGGGTGGCAATATTCCTATTGCTAAGCCTTTCAAATTT  
CTGAAGTTTTGGACTGAAAGTGAAGACTTCAAAGAGATAGTTCAACAGAATTGGATAGCTGATAAGTCTGATAAT  
TCTGTAAACATTTTCATTCAATTGAAGCAGAAACAGAAAAGAACCAAGGCGGCATGTCTAAATGGAGTAGAGATA  
AGTTTGGTGATATTTTAAGCAGCTAA

42      NO      ATGGAAGACTATCTTCATCTTTTATCCATTGTTGCTTTTTACGTAAAGGCGAAAGAAAGTTATTGGCAGATGCGAA  
CTCTTAAATGGGAGCCTTGGTTTGAACCAGAAGTAGAAACAACACTATTGGAGTGGCTTGGATATCTTTTCCAGATTT  
ACCTACAAATTTCTTTGCAAAGGAGGCGCTTTTCTCAGTAGCCAGTGCATTGGAAAACCCCTAACAGTGGATAT  
GGCTACAAAGAATCAGACGAGACCTAGTTGTGCGAAGGTCAAATGAGGTGGATCTCACTGCAAAGCTTCCCC  
AAAGAGTGAGAATAAATGAGGAAGATGACAATACAGGGGAGATCAGATACAGGTGGATTAAGGTACAATATGAT  
CATATGCCAAAATACTGTAAGGATTGTTGCCTTCAAAGGCATGATGAACAAAACCTGTTGGACGCTACACCCTGAA  
CTATATGAGGCAAACAGTGAAGAAGATAAAAAATTAGAGGAGGAAACAAAATCAATACCAATTATGGGAACAAC  
GGCTGATCAAAGAAGAATGGCAAGTGGCAAAGTAGTGGGAACAAAACAAAATCAACAAGAATGGATGGTACGA  
AGAAGAAATAAATACAGGAGAGATAAGTATGGCCATATTGAAGGGGAAATAGATTACTACCATGAAAATGCTTTT  
GAAGCTCTAAGGGAGGAGAAGGAGCACGAAGCTGGTACTGAACAAACGACTAAAGAATGGTTGAACAGTCAAT  
TTGGCAAAGGGAAAGAGAAAGTAGATTACAGAGAAGGAGAAACAACAAGAGGTTGCGGATGCAAGTACAATGCC  
GAATCAAAGCACGAGATCATTCAAAAAGAACAAGGGAAGGAAGGGTCATCACAATGCACACAAGAAGAGACTT  
GTAGAGAATCAAAGGATGAGAATGGTAAAAAGAATGAAGGTGCAATGGTGGTATATGGGATGA

- 43 NO ATGAATCTGCAAGGCAACAAAGTAGCAGAACAACAACCTGGTGATGCGACCTATTGGATAACAATGAAGGTGTACC  
AAGAATCACATGGACGGAGGAGAAGGTTCAACAGATGAATGTAGTTGAGGAGTTACAATTAGCTGTCATAGGAA  
AGTTTTCCCTATGGATGGCCAGAGCTGAATAAATTAAGGACCCTAATTCCTAAACAATGCAAAGTGAAAGGAGACT  
GCAAATAGGATTGTTGAGAAACAGATACATCTTGATACGTTTCAATCTAATGAAGGATTACGTAAACATATTGTC  
GAAAAGCGTCCATTACATAACAACAAGATGGTATAGCATATCAAATGAGAAGTTTCATTTACGATACTACTTTT  
ACGTCGGAGAAGGAAACAACAAGTTATGGCCTGGATTTTCGTTCCAGATCTGCTTCCCCTTTCTTTGCGTAA
- 44 yes ATGCCTGACACACCACCTCCTTTCTCTGTTACTCCTGGCGTTGCAGCTCAAGTCAGAGGACAAGAGCCTATTGAT  
CACTCTCACCTTTTTACCTTCATCCCTTAGATTACCATGTATGCAACTGGTGAGTTTTGTTTTCAATGGCAAAGG  
ATATGGGGGATGGAGAAGAGGAATCCTAATAACCTTGTCTGCTAAAAACAAGGTAGGGTTTTATTGATGGCTCCATT  
TCCCCCTTCATACTTCTCCAGAAGTCTCAAAGTTTGGACTCGATGCAATGATATGGTGATCTCTTGGATCTTAA  
ATTCTTTTCAAAGACATTGCTGAGAGTGTCTCTACTCAAGCACTGCTAGAGAGATCTGGAAGGACCTTGAAG  
AGAGGTTTGGACAAAGTAATGGACCTCAACTGTATCAGCTGCAAAAACAAATTAATGAATCAGTGCAAGGAAAT  
CTTGATGTAGCTGGTTATTATACAAAGCTTAAGCGTCTCTGGGATGAGTTAGACAATTTAGACATGGCACAACATT  
ATAATTGTGCATGTGTTTGTGGTGTCAAGTCTCAACAAGATAATAGGCTCATTCAAGTTCTTATGGGTTTGAATGAT  
GCCTACTCTGGTGCACGCAACAACCTGCTCATGTCATCCCCCTTTGCCTTTTGTAAATCATGCCTATTCCCTTGCTTAT  
TAGGGATGAGAAGCAAAGGGAGGTTCAAAGTTTTACCAAAGTGCAGAATCCTCTTTCTTTGCTGCAAGGAAAC  
ATCAAGGTCCTCAGAAATACAACCTATGGAGGGAATAGTATTTTGAAGCAAAGAAGACCAATTTGCTTTGCACTT  
ACTGTAAGAAAATAATCATGTTATAGCGGATTGTCACAGGTTAATAGGATATCCGGCAGATTTTAAAGTTTACTAA  
GATTAAGAAGATTTTTCTTGGTGCTAAGAGTAATGCTGTGATTACACCAGACGTAGGCCTTTGCAGTCTCTTGCT  
CTTGAGACAGACCCATCACTCGAGATCAGTACCATAACCTCTGTCAGATGTACCAGACTGGACAAAAATTGCCT  
CAAGTTGATTAA
- 45 yes ATGACGTCGATAAAGTCCCTAGCACGTGAGCAGTTAATAGGGTTACCGCCCTTTTTTTCAGAATTTGAAGACCGCTA  
TTTTCTGTTCTTGTGTTGTCTCATTAGCTCTATTGCCTCTTCTACTTCTCTGAGTTTGAAGTAAGACGGGGATTGGGG  
GGTTGGGGAGAGGAGGGGGCAGTACCTAGGATGGAGATGCCACATCGTTCTGGCTCTAGTTTCGAGCTCCTCAAT  
GACCCTACCTGAACCTACTGGGAAAGGAACACCCTAGTAGTACATGTGAATGGGCTTGTAGAGTAGATCTATC  
ATCGGGTTTATCGAAGGGGATGGAAAAAAGGGGTGTCCTCTACTGCACCTCTCAAGGGTGGAGTAGGGGAGT  
CTCCCACGATGGGATGTGGAAGAAGGGAAGATGTGGAATGGGTAGCTGGCTTGAGGTTGAAGTACTGACGACA  
ACCAAACCTGGTTGTTGTAGGATTTCAATTGCCATGTGCATCCCCTCCGAGACTACTTGGGCAATGA
- 46 NO ATGCCTAGTAGTGAGCCATCTCTGAGTGTGCAGTCGAGTGAGGTAAGTATAGATTTGTTGATGATGCTAGTGAG  
AATGATGAGAGGGTCGATGATGATTTGGCCAATGAGACTTATAAGGATGAGCTCAGGAGAGAGGAGGATGAGAA  
AAGCACTGATCCCCCGGATGATGTCACCTCCTAAGACTCCTGATGAGAGCACTCTACACGCATAG
- 47 NO ATGGCTCAGAAATACTTCAATGTAGGTATTACTGGCCATGATTCATAGAGATGCTCACGACTTGGTGAAGAGGC  
ATGATAAATGCCAACGACAAGGGGCTATCTCAAAGTGTCAAGATGTCCATGAATCCAATACTCGAAGTGGAAAC  
TCTATGATGTTTGGGGCATTGATATCATGGGGCCCTTTATCATTTCATACAGACAACAGTATATATTTTTAGCAGTTA  
ACTATGTGTCGAAGTGGGTGGAACCAGATAATGAAGCAAAGAGTGTGTTAGGGTTTTTGAAGAAGAACATTATCT  
CTAGGTTTGGCACAACAAGATCAATCATTAGTTCTCTAGGCTACGAAAATAGAATTGACTCAACACAAAACTTG  
ATGATGCACTTTGGGGTTACCGTACAACCTTTAAGACACCAATATGA

48 NO ATGGCTCCCAAACTGCTGCGCACAGGATTAACAGAATTAGAGAAAAAGCTGGTTTCATGGAAAAAAAATTCC  
TTTCACCTACTTGGGTAGCCTCATTATATTGGAATGAAGAAGATCTTCTACTTTGACGGCATGGTCGCTAAAGTG  
ATGAAAAGACTTAACGGTTGGCAAGGAAGGATTCTATCTTTTGGGGCAAGATCACCTTGATTAACATGTCTTG  
CAGTCTCTCCCTACGTACATATTGACAGCTATATGCCCTCCCAAAGGAACTTTGACCTTCTGGAGAAACACTTTG  
CAAATTTCTTTTGGGGGCTACTGGTGTAAAGGCTAAATGTCACTGGAGTGCATGGGACAAGCTATGCTTATAAAA  
GTAA

49 yes ATGTTTCTCACGGTGGACCTTCCCTGCCCCCGTGACCCACCTCCGCTACATCTGCAACACCCTCACTCACAGATG  
GTCACTAACCCCAACCTTCAAATTCATTTCCACCCTACCAGATCCCAAATACTCTGGCAATTCTGGACTAGTGA  
GGCAGAACCMAAAACAAGCCTGTACAAATGTTGAAATGGGCAAGCAGATCCCCATCAATCCTGGGCTAGCTGCT  
CAAAGGAACAAAGGTATGGCCATACTTCTACGCAAATGCCACTGTAAACAGAACAGTAAGACAAAATCGAAT  
TCGACTAGAGACGAGAGGATATGAAATCCAGGATGGAAAACCATTAGTGGTTTTTACGAAAGAAGAAAACGATC  
TTCTCGCTCAAACCTGCAAATGGACTATAATATGTAATATCTCACATATCCGACCTTCAATTGACATTATTCGAAA  
GAATTTGCCAAAATGATTTCTAGCAAAGGCAATGTTAAAATCGGAGCGTACGATATGCACCATGTTTTTCATTGATT  
TTGACAATGTCGATGACCACCTCAACGTCTACTCGAAAACTTCCCTCACTTTTGGGGAAACTCATATAATGAAAT  
CCTCAGATGGACACCCAACCTTTAAACTAGAAGCTGAAACCACCTTGGCTCCGGTATGGATCAACCTTCCCGACCT  
TCCATGGCACTTTTATGAATGGGATGCGATTCAACGAATATGTAAACCTATAGGAACCCCATGATCATGGATAAAG  
CCACCAGCTCGAAAACAAGACCGGCAACCGGCAAAGTCAGAATTGAAATAGATCTAACAAGACCCCTTGTGTAT  
GAAGTTCTTGTGAAATACGAAATGAGGAAGGCAAGATGGAAGTCATTACTCAAAGGTGGAATATGAGACCAT  
TCCGGCATTCTGCTCCCACTGCAAAGCTCAAGGCCACAGAGATGAAAAGTGCAGGAAACTTCACCCAGAGTTAA  
GACAAGAGCCTGGAAAAACACCAATGATGTTGGACAAAGCAAAAATGTAATGGACAACCAATTTACTGATGGA  
AAGAAAGCTCCAAAGACCAACAAAGAGAAAAATGAGGGTAACAATAAGAATCATATGTCTGCAAACCCACCTCA  
ACAAGATAATGATCCCGACTTAACCAACAAGAGGATGGGTGGCAAACAGTCGAAAGAAGGAAAGGAAGAACA  
ACAAACAATGAGAAACATCAAGGAAACAATGTTATGCCACAAAGAGTTTGGAAAAATGCACAGGAGACAAAAG  
GAAGAAGAGTTCTACCACAGGAGAAACAGAATAGTGGAAACTTCTCTCAACTTACTAATGTGTTGGATAAAATG  
GAGATTACTGAAGATACTACTGCCTCAACCTCCCAAAGAGAGGAAGAATATCACCCAATTCACACAAGGGTACAC  
AACAAAACCACCATCGATAATATGGACAAGAAAAACATAAAACCAAGATCCTCAAAGCTCAAAGCAAGATAAG  
AAGAAACAACATCAGAAGGAAACTAATCCAGACATAAAGCTTCAGGATCAGGATCCAGAGAATCTTTTGA  
TTCGAGTGGAGGGTGAATCTCAACAAAACCAATAAAAAGGGTAGGAAATTTGCTAAGAAAATTTCCATACCC  
CCTGAAGTAACCTTTGTCGCAGAAGAGAGCAGAAACAGGAACAACGACAAGCAGGATATAGGTATCAAACCGTT  
ATTTGGATTGGACCCTATACTATCTGGAATGAACACAAGAAAGAAAGTGAGAGAGATGGAACCTGGAGGAAATCA  
AAAGGAAAAATACAATCTTTGAGCCCGTGGGAGTCAATTGA

50 yes ATGACCCACTTATACCCGAAAAGTAAGCTAACAGCCCTATGGAAAACAAACGAGAAAATCTTACTAATCGACCTA  
GGACATGACTACTTCACGGTAAAATTCCTTAAGGAAGAAAACATGAACATGGCCCTCCATGGGGTCTTTGGTTC  
ATCAATGGTTTCTTCTATCCATAAGGCGATGTCAACCAAACCTTCGTGGCATCAAGTGCAAAGGAACTATCACTG  
CAATCTGGTTGAGATTACGGGAACTCCCTACCCAATACTATGATCATAAGAGATTATATATGAAGGGGACGGTATCC  
TGTGCGTGGAGTGTGGATGTGTGGGCCACACCTACTTGA

|    |     |                                                                                                                                                                                         |                                                                                                                                                                                                                                                                                                                                                                                                                                                                                                                                                                                                                                                                                                                                                                                                                                                                                                                                                                                                                                                                                                                                                                                                                                                                                                                                                                                                                                                                                                                                                                                                                                              |
|----|-----|-----------------------------------------------------------------------------------------------------------------------------------------------------------------------------------------|----------------------------------------------------------------------------------------------------------------------------------------------------------------------------------------------------------------------------------------------------------------------------------------------------------------------------------------------------------------------------------------------------------------------------------------------------------------------------------------------------------------------------------------------------------------------------------------------------------------------------------------------------------------------------------------------------------------------------------------------------------------------------------------------------------------------------------------------------------------------------------------------------------------------------------------------------------------------------------------------------------------------------------------------------------------------------------------------------------------------------------------------------------------------------------------------------------------------------------------------------------------------------------------------------------------------------------------------------------------------------------------------------------------------------------------------------------------------------------------------------------------------------------------------------------------------------------------------------------------------------------------------|
| 51 | yes | GO:0003676;<br>nucleic acid<br>binding;<br>Molecular<br>Function;GO:000<br>3677; DNA<br>binding;<br>Molecular<br>Function;GO:001<br>5074; DNA<br>integration;<br>Biological<br>Process; | GTCAAGTGGATAATAGATACAGGGGCAACAAATCATATGGTTGCCAGTTT<br>TAGATCTGTTGTCAGATATAAATGAGG<br>ACCTTGCCAGTGGGATTTTGAAGGGGATTGGTAAGGAGACTGATGGTTT<br>GTACCTACTTGCTTCACTGCCACATA<br>CTGGAACACATAATGGAACCTGTTTCACTGATACATCTGTGACAAAAGCC<br>AACATTGCAGAGCAGAAAAGAGAT<br>GATATACTGATGTGGCATAAGAGATTAGCTCATACTAGTTTTTCTATGAA<br>AAATTTGTTTGGTTATAGTCTTGAT<br>GAATGTAGGTCAGTCTTAGCTGATTGTGAGAAACTTGTGTCTACACTCCT<br>CAACAAAATGGAGTAGCTGAAAGA<br>AAGCATAGACATTTGCTTGAATTGGCTAGGGCATTGAGGTTTCAGGGTT<br>GCATTCCATTGAAGTTTTGGGGTCACT<br>GCATTTTACATGCTACATATGTGATTAACAGATTGCCATCTACAGTTCTT<br>AAAGGGAAATCTCCTTATGAACTGTTC<br>TTTGGTAGAAAGCCATCATTGATCATATCCGGACTCTTGGGTGTCTTTG<br>TTATGCTAGTATATTGCCTCGAGTGGA<br>CAAATTTGCCCCTAGAGCAGTTCCTCGGTCTTCATGGGTTATTCCAGTCT<br>TACCAAGGGGTACATCTTGTTGAC<br>TTAGCCAAGAAAACCTTTTTTATCAATAGAGATGTGATTTTCAAAGAACA<br>TATCTTCCATTTACAGTGTACTGC<br>ACCTGTTACTTCTGTTGCTCAGTTCCTGGTTCCTTCGATTATGATCTTTT<br>TGAACCAATTACTCCTGTGGATATCCA<br>TATAGACCTGCCTGTTCCCTAGCCCAATTGATACTGAATCTGATTCTCCT<br>GCCTTAGATCATCATTCTCCTTCTATGGA<br>CCCTGTTCCCTATGCCATTCCTTCTTCTGAAGTTTCTCATTCTGATCCTT<br>GTTCATCCACAACACTCACTTACCTGTTCC<br>CCTGAGAAGATCACAAGGGTGTCTAAGGAGCCTCTTGGCATGTTGACTATA<br>TACCAAGAAATCTTCTGCTCA<br>TGCTTCGTATCCATCAGTGCTTACCTCTTATGAGGCACTCTCCTTCTCACC<br>AAGCTTATCTTGGAACTAAGT<br>CCTATAAGAAAGCTGTTCAAGATAGTAGATGGATAGAGGCTATGAATTCT<br>GAATTGCAGGCCCTTCAAGATAATCG<br>TACATGGAAGTTGGTGCAACTTCCTCCTGGCAAGACTGCCATTGGGTGTC<br>GATGGGTCTATAAGGTGAAGTTAAA<br>GGCTACTGGTGAGGTTGAAAGGTTAAGGCAAGGTTGGTCGCCAAGAGGT<br>ATAACCAACAGGAAGGTCTTGACT<br>ACCATGAAACCTTTTCCCCTATTGTTAAAATTGTCACTATTCGAGTTGTTT<br>TGCTCTGGCTGCTCAACATAATTGA |
| 52 | yes |                                                                                                                                                                                         | ATGCTTGAGAGTTCATTTGAGAACTTCAGGTGGTGCTTTATTGGCATCTAC<br>GGGGCCACATACTAACCAGAAAGA<br>GAGGAGATGTGGGATGAACTAGCACGGATAAGGGGATTATGGGAGAATCG<br>GTGGGTCATTGGGGGTGACTTTAAT<br>ATGTGCAGATCTGAAAGTGAAAGACTCAATTGCACAATGAGATCAAGTGCA<br>ATGGCAACATTCTTAGATACTATTA<br>GAGACCTAGACATCATTGATTTCCCTCAACAGGGAGGCCAATTTACTTGGT<br>CTAGAGGAGATAATAACCAACAAG<br>CATCAAGAATTGACAGATTCCTCATTTCACCAGAATGGACCGACTCTTTC<br>AAGGCAATGAGACAGATAGCAATGC<br>CCAAAGTGATCTCAAACATAGACCCATTTTGTGGAAAATGGCGACTGGGT<br>CTGGGATGCCACTCCATCTTACT<br>TTAAATTTGAAAATATGTGGCTGGCGGTAGAAGACTCTTTCTAG                                                                                                                                                                                                                                                                                                                                                                                                                                                                                                                                                                                                                                                                                                                                                                                                                                                                                                                                                                                                                                                                                |
| 53 | NO  |                                                                                                                                                                                         | ATGAGTATCCACAGGAGTCTTCACACTGCCTTAGCCATGCATGAACTATT<br>CAACATGCAAAAGTGTGACTGGATG<br>ACTGGCCAATCGGGCAAATATAGTGCCATCGTGGTTCGAGAGTTTTATGAC<br>TTGTATGCAACAACGGTGAAGAAT<br>GGCTTACATCTGACTGCCAAAGAGCTTGCCAGCCTTCACTTCTTACCAC<br>TTTGGGTGTTGATGCTGAGTGGGTT<br>CGTGATTTCTCAGCCTTTATCAAGAAGGCTTACCTAATTGTTGCAAAGT<br>TTTGGTGGTCCATTGTCCGTGCTAAAC<br>TATCTCCTATTATGGTAGACAATCAGTTGTCATTGGACCAGGATGTGATGG<br>CGGCATGCATGATGGCTGGGTGTGA<br>GATTGACTTCGCCTGCATCCTGATTGCTCAGATCCACGAGAGGGCAGAC<br>ACTTTTCGTGTGGCTGGGAAGGGTAC<br>ACACACTGAGGCCGGTATGGATAAGGGTGCTGAGGAGCGCAACAGAAAG<br>GAGAGCGGCGTGCAATTGAGAGG<br>GATTAG                                                                                                                                                                                                                                                                                                                                                                                                                                                                                                                                                                                                                                                                                                                                                                                                                                                                                                                                                                                                                                    |

54 yes ATGAACAAAAAGTTCAACAAGAAAGAAGTTTGGGACATCTTCAGCAACAGTGATGCCAGAGACGTACACCATAG  
GAAGCCTGTTTACCATAAGGATGAGTTCTTTGACTGTCTTTCTTATGGTCTACCAGAGCATGAATCCATAGTGATG  
CCCTCTGAACAAATGAGAATAGACAACGAGACCTTTGGAGTAGAGATCCCAATAGTCCATCTGGATCATGAGAAC  
GGACTACACTCGTCTAGGACATCTCAAGCCTCGACCTCGACCTCGACCTCACTTGGTGGCAGAGGACATGTCAAT  
GTGCGTGGTCTGTAAAACAGGTGTGGAGGCGTGTCTCAAATGA

55 NO ATGGAATGGTGTCTGGTGTCTGATCAACTGTCTAAGATGATTTACGTAGCAATCATAACGGATGCTCTTTGGAGGAA  
CTTTCTGTGGCATGGCAACAAGGAGAAAAAAGTTACCATTAAGTCAAATCAAATGGAAAATCTTAGTATTGGCC  
AAGAAACATTTAAAGGTTTGGGTATCAGGAATCTGCGACAAAAGTCTTCTAATGAAATCGCTTTGGAGACTGCCT  
AA

56 NO GCAGAGTGTAGGAGCATGATATCTGTAGTTGCTGAGATTACTTGGCTAGTGGGCTTTTTTAATAAGTTGGTAATGC  
ACATTCAGTTACATGTTACTATATTGAGTAATAGTAAGTTATCTGTTTCAGTTAACAACCAATTCATTTTTTCATGAA  
AGGATCAAGCATATAAAGATAGATTGCCACTTCATCAGGGACAAGATCAAGGCAGGGCTGGTTGAAATTATCTAT  
GGTCATACTCAGGAACACGTTACAGATTTCGCTAACTAAAGGTTTGGGTACACTCAACACTTGCATCTTATAGGC  
AAGCTTGGTGTGCTCAACATCTTGCACCATTCAACTTGA

57 yes ATGACGACAATTGCGTGGATATCTTTTCCAGCATTGCCGCCAAGGTTTTTTTGGAAAGAGAGGGCAGTCTTTTCGTTG  
GCAGCATCAGTGGGAAAGCCACTACATCTACACATGGCGACAAGAAATCAAACAAGGTCAAGTTGTGCGAGGGT  
GAAGGTTCGAAGTGGATTTATTGGGGGAACTTCCCAATGCATAAACATAGGCTTGAAGAAGAAGAATGGAGAAA  
TTGCTGAAAAATGGATAAGGATCAAGTATGACTATGTGCCAAAGTATTGCAAGACGTGCATGATACAAGGACACA  
ATGAGGAGGAATATTATGTGGAACATCCTGAGTTATAACCTAAGGCAGAGACATCTGACATAGTGGGGGAAAAGC  
GCAAGAAGGAGGAAGGAAAGGCTAAGGAGGTTGTCCAAAACAAGAGGAAGAGGGTAAGGCGCAACAAAAC  
ACCATCAAATTTGACAATAGAAAGAATAAAGATGATTTCCAGATACATAAAAACATGAGAGGTGAGTGGCGA  
GGTAATCACCAGGGATAAAGAATCAAGAGATGAGATGTAATAAGGTGGGTGTTATATCACACAATCAGTTTGAA  
GCACTAGGAGTGGAAAACAGGGCACACACTAATGCAACAGATAAAAATACAAGTCCCTCATGCATCAAAGAAGG  
GGTGGAGGAAACATTAGGAAAAGGCTTGCCAAAGATCGATGGGGATAAGATATCAGATTTGGGGAGCAAAGGCG  
AAGGCGATATGAACAACCTCAAATGGGAGCAGCACTTAA

58 NO ATGGATATGAGGTGGCTACGAGATTCACTAGTGGACGAAGAGTACCGGCGTAAGGTATGTCGTCCCACTACCGAG  
GGCATTACCAGTGCTTATTTTCTACTAGGGCACAAAGGTTGTTGTCAATAGGAGTTCGGAGGATTCATTCATCAA  
GACTTTTACAGAGGCAACAAGAAGGGCTTGTTCCTTCCCTGGTTGGTGTCCGCACTTTGTAGACAAGTTGGGGTAC  
CAAAGGATGATACATACCAAACACCAAATATTGACGCCCTATTCAACCCACTGCTGGTGAGGAAGTTACCCGCTC  
TAGAGTGGAAAGAAGAGGAGAGTAGATGAAGTTGGGAGCAACCGTGTCCGAGCAGGTTTAGGCAATGAGGAGGA  
TGAAAATGTTGATGATAATGTCCCTCTTTCCAGTCCCAACACCCTATTTTTGGCGACTACGTGTAG

59 yes ATGGACCTTGCAACTGATCACAAAACAAGACCTAGTATGACAAAGGTGAGGGTGGAGGTCGATCTCACGAAGCC  
TAAATTAACCTCTATTTTTGTGGGATTAGAAGATGATTCTTGTCCATTGAAAGGATACTATATGGTAGATCTAGGCA  
ATAATATGGAAAAACCAATATCAATGAGGAAAAATATGATACTATCAAAGGCAACAATGAAGCAACCGCTAGCT  
CTGATAAAGTGCGCAGCAACGAAGACGATCAACAAGTGAGTAAGAATATTGAACAGCATGGTTGGTATTACAAG  
GAATCATCTTGTGATTGA



60 NO ATGACCAAAAATGTGAATGTATTGCAAGGTATTACCCTGCTGGAGCTGGGTAACAGCTCAAAGGAGAACACGCTA  
ATGGGATCTCTGATGGGAACACTAGTGGGAAGAAATAAAGCTTTGGGGAACACCCAACCAGGAAAGCAAAGCT  
CCGAGAAGACATCTTGGGCAGATATAGTAGAGGAAGAAGATGATCAGCTTAATGAGGGAGACAAAAGTAAGTCG  
GTACGTACATGGAGTAACATTGTGGGAAGGGTAAAACCAATAGAGGGGTTTTATTTGAGTATTGAGGAACAACCA  
AAGGGAAATATAAAAATCACTCTAGAAGATATAACAAGAAGAGGTTGATTATTGGGGAACAGTAGTATTGCTAT  
GTATTGGGGTCAATCCCACCGCATTTCGGTAATGGAGGGCTATTTTAAAGCGGATATGGAAAACCCTACAAATTGACA  
AAATAGCACAGGTCAATAGAGGAGTATTCTTGGTACGGTTTTGCAATGAAATGAACAGAGGGAAAGTGGTTGAG  
GAGGGTGTGTAA

61 yes ATGATCCTAAATGATGAAGGGCAAAGGCAATTACTAGTTTTTCTGTTGGACTACTTGGAAGTGGACCAACTACTT  
CATCACAAGATGAAGCTACACCTTTGTATTCAAACCAGGAAAAGTCTACAAATTAGTGGGGTATCCATCAAGC  
TTCAACAAAAAAGGGAAATACTGATGGTGGAAAAAGAGGAGCATATCAAGGAGCATATCATGTTCAAGCTGAG  
CAGAATCCTATTGTCAGTCAGGGACAAGAAAGTCAGGTTATAGCCAATGTGACTGGCCTCTATCAGAAACAAGAG  
TATGATCCAAGGTGTCAGATGGCTGGAGGAATGAAAGTGCAGCCTGGAGCGTGTGTGTTCTCTAAAGAACAATAT  
GAACAAATACTCCAGATGCTGGAAAAAACCAACTATGCTTCAACAAGTGTCTAATGTGGCAGGATCTCTAAGCAAT  
GCAGGTAAAACCAGTGAGACAGACACTGGAGCAACAAACCACGTGGTATCTGATGTTACATGTTAGATAAGAC  
CTCAGTTACTGCTAATGTCAATCCTAAGAAGGATCTCTCAAGTGGGAAGGTGAAGCAGATAGGTAGACTGGAGG  
ATGGGCTCTATCTACTTAATCTAAAATATGGACACTCTACTCATGAAGTCAAGTTAGCTGTAAACAATACTCAGTCA  
ACAGATAGTGAATCAGATATAAATCTGTGGCATAGGAGGGATGTGGTATTTAAAGAAAATGAATTTCTTCTATGAT  
TAAAACAGTAGATCCACCCTATTTCAAAGTTGGATCCTGTATCTCAAAGCTTAGTTAATTCTGATCCTCTTGATA  
ATCATGTGTGCATTAATTCTGATATATGTCTTGATAGTGTATTCTAATCTTAAAGTTGATCATAGTGATGAAGGTA  
CATGTAGTAATGATCATTACAAACCATGACTCAGGAGGGTCAACAACCTGTAGCCCAGCCTAGTGTTCCTATAA  
GAAGATCAAATAGAGACGAGCAACCACCTATATGGCCAAAGGATTTACATCAATAACCAATATCATTAG

62 yes ATGTCAGATCCTCCAAGAATGGCATTTCGGAGGATCCGAGCAACATAGCTTTCGAAGCACACTTATTCAAAGAA  
GCGTCACTTCACCCAGACAAACAAGGTTCGGTTGGCTAAATATGCCACTCTGCCTGTGTGGCGAGTGCTGTATGCC  
TATTAA

63 NO ATGAAAGGGAAACAAACTTTGGTGGAGGCAACTCCATCGAAGAATCCCAACAGTGTGAACTTGGAAATGACTCT  
GGCTCTAGGAGGAAAACCAACACCAAAACAAGGAATTATCAATGAAGATCTTACTTTGGAAGTGTAGGGGTGAAC  
ACAGTGCTGATTTTAAAGAGGAACCTGCGAGCTTTGATCGATTTGAATTACCAACTATCTTGGCTCTTACGGAGAC  
AAAATGGAAGATCATGACAACCTATTGCAAGCATTGGAATATACTGATGTCATACAAGTCACTGCTTTAGGATAC  
TCTGGAGGAATTGCACTCTTTTGGAAAAGCTCAGAAATTACAATTGAGCCTTTCGTCCTAACTGACCAGGAAATT  
CACTTAACTATCGAGCACTTCTTGTGGCTCCTCCTCAATAAGCTTCTACTTCTCCTCAACCTTTTAAATAGGAA  
AATCACCCTAACAAAAATTGTGGTACTTGCCAGACCTAGAGGAAACACCTAACCACATTTTCATGACTTGCC  
GGTTGCCAGGAAAATTTGGAACCATTACGGCATAACTCTTAGCAACCATGATCTTACAGCACCATAAAGCTCCT  
TTGCTGCTCTAAATCACATGCTACCATCTACAACAATCTTAGAGTGCCTATGGCCATTCTACTATGGCCATTCTAA

64 NO ATGATAGGGGAGGAAGAAGTACTAGAGGTGAAACAATTCATCGTGAGTGGGGAATGGGACAGGCAGAGGTTAAGCA  
ACCTAATTTCCGGAGGAGATGACTGACTTTATTGTAGAGACTATACGAACAATTATTGAAGAAGGGGCATTGGATAT  
TCCTTGGTGGATGGGAAGTAAAAGTGGGAAATTCACTGTGAAGTTTGCTTTTGAGTGCCTAAGGAGGAAAAAGG  
AGAAGGTCTGGTGGTGGAGTTACATTTGGAGCAAAGGAGTTCCTTTTAAAATCAACTTCTTGCTTTGGAGAAGTT  
GGAAAGGTAAAAGTAGCTACATATGATACGCTCAAAAAGATGAGGATCACTGTAGTGTCCAGATGCTACTGTTGTG  
ATGCACATGAGGAGGAGACAATGAATCACCTTTTTCTAATAGCCCCATAGCCCAAAGCTATGGAGAAAGTTTG  
CTTCTTGTGCAGGAATCAAATGGAGGGCGGATTACAACAGGATATCACAGAATGGTGGGAAGCAGCTACCAAG  
CCCAAGTTAAAAGCTATATTTCAAGGCTATCCCTTCTATTTTGATGTGGGAAGTCTGGAAACGAAGGAATTCCAGAA  
GATATGGAAGTGAAGTGAAGTATGAGACATTACTTCAACAATGTCAAGAAGCAGTATTCAAGCTAGTCAAGACAC  
TATACCCTTGGATCATGTTTCAAAAAAGTTGGGAGAATCTAGTAGAAGTGCTAAAAGAGTATAAACCCAAGCTAC  
ATTACCAAGCTATAACTTGGGTGAAACCATAA

65 NO ATGGAAGATGAAGAACAAGCATTTCCTAATGAAGATGAACTTCATGTTGCTTCTGCTCTTCTCCTTTTATCAAATA  
CACATTCTCCATCACCCAAAGTGAAGAGCATATCTGAGATTTACAGATGGCGGCATTGAGTTATACGTCTTCCGGT  
ATCGGATTCGACGTCAAATCGACTGATTCTTCAATTGTAACAGCTGATGATGATGATACACATTCTCCATCTCCTA  
AAATGAAGATCATATCTGAGATTTACAGATAGCTGCATTGAGTTACACGACGTCGGTATCGGATTCGAAATCCAA  
ATCGACTGATTCTTCAACTGTAACAGTTGATGATGATGATACACATTCTGCATCTCCAATAGTGAAGAGCATTCTG  
AGACTTCACAAATAGCTGCATTGAGTTATGCGACGTCCGTATCGGATTCGAAGTCCAATCGACTGATTCTTCAAC  
TATAACAGCTGATGATTACGACGATGAGGATGCTGATTATGATGATGATGCCTCGTTTGCTGAGGCTAAAGCAAAT  
GCTCGTCGGATTAAGATGATTTCGGATGATTTCGTGTCATTAATAAGCTCAAGGCGGTGCGAAGGAGACGATCTAAG  
AGCTTATGCATTTCCGATTGCCTGAAAATCAGCTCCGGCAAGCCTAAACCGGCGTTTTTTCTGGCTACCTCTTGCA  
CATCAGCTTCGTCGTGTGTCCATTGGCTCTACTGCCGCTGGCGACATCTCAAGCGGCGGAAGCTGTGAGGCTA  
ATAGAGTAGTACCAAAGGAAAGAGAGTGTGTTCCGAGGAAGATGAAGTTAGGATTCGTCAGCTTCTTGGTGATA  
GCCCTGATACCAGCAAAGCCTTGA

|    |     |                                                                                                                                                                                                                                                                                                                                              |                                                                                                                                                                                                                                                                                                                                                                                                                                                                                                                                                 |
|----|-----|----------------------------------------------------------------------------------------------------------------------------------------------------------------------------------------------------------------------------------------------------------------------------------------------------------------------------------------------|-------------------------------------------------------------------------------------------------------------------------------------------------------------------------------------------------------------------------------------------------------------------------------------------------------------------------------------------------------------------------------------------------------------------------------------------------------------------------------------------------------------------------------------------------|
| 66 | yes | GO:0003677;<br>DNA binding;<br>Molecular<br>Function;GO:000<br>3899; DNA-<br>directed RNA<br>polymerase<br>activity;<br>Molecular<br>Function;GO:000<br>5666; DNA-<br>directed RNA<br>polymerase III<br>complex; Cellular<br>Component;GO:0<br>006383;<br>transcription<br>from RNA<br>polymerase III<br>promoter;<br>Biological<br>Process; | ATGATTTGGCCTTGAAAAATCCTCATGGGGTAGATCTTGGTGATATTGTACCTCCAGATAAATATGATGAAAACA<br>CCATCAATTGTGCTGCAGAACTTGGTTTGGTGGAGAAAAATGACAAACCACAGATGATTATGTTTCAATTGCCAC<br>ATCATTGCTTAAACAACAGAAGGACGACAATGTCCTGCTCCAGTTCTGAAATTCCCGCAAATGCAAAAGGG<br>AAAGGGAAAGAGAAAGCTTTGGATGATGATCAGGAAGAGGGCTAGCGGACGCAGGTGCAAGCTGTTGGTTTACA<br>AAAGTGGAAATGTTAAAATGAAGATCGGAGATGATATATGGGATGTTTCCCCCGGTGTCAATCGCAGATTTTGTCA<br>AGATGTTGTTGCAATCAATACAAGCGACAAGTACTGTGCTCGCTTAGGTAAAGTTGACAAAAACGCTGTTGTGAG<br>TCTTGACTTGGATTCTTTTGA                                     |
| 67 | yes |                                                                                                                                                                                                                                                                                                                                              | ATGACGATGGAGGAGCCAGGATTGCCGGAAGAAGCGTCCGTGGATAAACAGTCCAGTACCGGAAAGTCCATTAC<br>GCCTTCGTGATGATGGCAGATAATGCCGCAACTTCAATTGCCAATCTCCGCAAACCTCTCTACTCCCTCTTAGCC<br>TTGCAATGCTGCTTCACTGAGTTAAACCACCATATCAATTCCATTTGGTCCATAATCACTCTGTGATACCCGGACT<br>TGCGACTAATATCAGTACTCTTTTACCGCCAGCCGCGGTGTCCTCCGCCCCAACCCAGCCACAGAACCATTCCC<br>AAAGCCAGACACTAACCCAGCCACAGAACCCTCTCAATGCCAGAACCATCTTGGGAATTGTCTTTTCGAAATTC<br>AACTGTGCCTCATAAATTGTGAGGAGGGAGTACTTCATCATGCTTGGGACACACTAAGAGCTCCACCCTTTTCA<br>TTTATCCAACCCGAAACGACAATTTTTATTTTATTTTATTTGGTAACACCGAGTAA |
| 68 | yes |                                                                                                                                                                                                                                                                                                                                              | ATGTTAGAATTGGTCATTCCCTAATAATCTTCTATACAAGCAAATACTAATGCTACTGGATTTTCATCAGCAGTGGC<br>AACTTGGTATGGAGATCCCACTGGAGCTGGAAGTGGGGGAGCTTGTGGACTAGAAGATGATGTAACAAAAGCAC<br>CATAACGCGATGATAACTGCGGGAAATCAAGTTTTATTTCAAACATGGTTTAGGATGTGGTGCATGTTATCAGGT<br>ATTATGTAATCAAATGAAGAATGTTCAAAAATCCAATAACAGTAACTCTTACAGATGAGTGTCCAGGAACATGT<br>AATGATGATCCAATTCATTTTGATTTAAGTGGAAATGCCTTTGGAGCTATGTCAAATTTGGCCAAGCTGACCAAT<br>TACGTAATCTTGGAAAGATTGATATTTATTATAAAAGGTGA                                                                                            |

69 NO ATGTTATGTGATTCACCCGGAATTGTATCCCAAAAAGAGAAGGTAGAGGAGGACCAAACCAAAGAAAAAGGAA  
AAGGGGAGAAGGCCAAGAAACAACAAATAGACAAGGAGAACATGAAGAAGGACGAACATCTAAAAGATACGG  
AAATAAAGCAATTTAGGGAAATACAGTACAGAAATGGTAGAGGAGGAAGAGGCAATGGTAGAGGTAGACCGGA  
AAAGGTTTGGATAAAAAACAAAACCAATTAGTAAGCGAGGGGGTGTAGTACAGACAACAAGTTTGTGCTCTGG  
AAAATCAGGATGAAAATGAAGAACTGGGCAACTAAAGGGGATAACATCAACAAAGAAATGGGTTGAGGAAAA  
ATTCAAGATAAAGAGAAGGATACAGAAGGGAGTGGGGTGA

70 NO ATGCAACCTATTGAGGCTCAAGAGTTATGGAAGGAAATTGCAGAGTTTGTGGATGTCAATGACATAGTGAAATCA  
TTTAGCAGTGGGAGGAAATCATGGGCAGATAAAGTGGAGGAGATGGTAGATGTGCCAGCAAAGAAGAGCTCAAT  
ATGGGGCAATGTTGGCATTGGCAAGATAGTGAATGTTGGATTCAAGCTAAAGTATGTTGCTCCATCTAGCATAGAG  
GATAGGAAGGCACTATGGTCTACTCTAAAAGCAATACACAGATCAAACAGGAAGCCATGGCTATTAATGGAAGAT  
TTTAATTCTACACTTCATGCTGAGGATAGGATAGGTGGAAATCATATCTCTTTGACAGATGGGGTGGATTTTACAGA  
GTGTGTAGATGAGTGTGGATTGATTGAACTTCCTTGA

71 NO ATGGAGAAATTAAGAAGTTTGGAAAGCTATTCAGAACTTAGAACTTTAAAATATGATGATGACCAGTTGATCAAG  
GACAATTTAACAATGAGTAAGAAGAAGTGGCAAAGAATGAAGATCCATTGGAGACAGAGATCTAGAATCCAATG  
TATTAACAACGGGGATAAGAAGACGAAGTTCTTCAAAAAAAAAAATGGCTACAACCTCACAAAAGGATTAA

72 yes ATGGAAGAACTGAAAATGTGGAAGATACTGAAGTATCAGAACTGCTACTCAATGCCGGTCGACTCTGTCTCTA  
AACTCAGAGATCGAAGATGCTGAAGCAGAACTACTAAACGCAAGCCGACGCAAGTGATCGGAGAACTACTA  
AACGTAGGCGGACGCCGTTGAATCCGGAGTGC GGCGAAGATGCGGAAGCATCAGAGACTTCTAACTTTTGTCA  
AAGCCAGTGGATGGAGATGCTTCTAAGCCAGTGGATAGAGATGCCTACGGCAAGATAACCACTGGCATTGCTCT  
CCGGAAATATAACCAAGCTGTGGCAGAATCTGCACCGCCAGATGTTTCGAGCAAAATCCGAAAAAGAAATAGCCGC  
TTATGTGAATAAAATAATCATGCGATATGCTCCTAGTCAGAAAGAGATGGAAGTGCAGAGAAATACAGGGACAAAAT  
CATATCAGACTATCCGCGTTACACGAGAACTATATGCTATTCATCCTACAGAAATTTTTGTCCCTTCCTTTATCA  
AGGCAATCAATGAGAAAAACAGAGGATAGTATCAAGAATATCATTCTAAGCCCTTTCCGGGTATTTAACCTTCGA  
AATCTTTCAACCAGAGTATTGTGAGATGTTGGTGGCTGAGGTAAACCATTTTCAAACCTGGATCCACAAAGCAGA  
CATCCGAAGTGCATCGGAACAATATGAACAACATGACGTATCTTGATGATTTAGGAATGGGATGTATGCTTCAA  
AATCTCATGGACAGTTTTATAAGTCCAATTTCCAAAGTTTTTTTCACTCAGGTTGGGGGATCTACCCTTGATGAAC  
ATGAGTGC GTTGTGAGTGTACATCCGATGGCGAAAATGAATTAGCTGTTCAAGTTGATGACGCGGAACTTACCT  
TAAATGTGTGCTTGGGTGAGCGATTCTCTGGGGGAGAATTGTGCTTCCAGGGTGTATATTGTGAGAAACATGTGG  
ACACTCCGACACGACCTGAGATGATCCCAAGAAAGCTTACTGTAAAGATTGCTACCAAAGAAGAGTGA

|    |     |                                                                                                                                                        |                                                                                                                                                                                                                                                                                                                                                                                                                                                                                                                                                                                                                                                                                                                                                                                                                                                                                                                                                                                                                                                                                                                                                                                                 |
|----|-----|--------------------------------------------------------------------------------------------------------------------------------------------------------|-------------------------------------------------------------------------------------------------------------------------------------------------------------------------------------------------------------------------------------------------------------------------------------------------------------------------------------------------------------------------------------------------------------------------------------------------------------------------------------------------------------------------------------------------------------------------------------------------------------------------------------------------------------------------------------------------------------------------------------------------------------------------------------------------------------------------------------------------------------------------------------------------------------------------------------------------------------------------------------------------------------------------------------------------------------------------------------------------------------------------------------------------------------------------------------------------|
| 73 | yes |                                                                                                                                                        | <p>ATGGAGCTCCTGTCGAACTACATTAATCATCAAGTCGACATCCTCCGATGGGAGCCTATCTCCCTGTCAGCTAACA<br/> GCCCTCAATTCTCGCATCTATTCTTTGCAGATGACTTGACTTTAATTTCTCGGGTGACCCAAAAGTCAATCAATACC<br/> ATGTATGAATGTATGTCTGCTTTTTGTGAACTGTCTGGACAAAAATAAATGTTGCTAAGTCCAAATCCATTTTCTC<br/> TCCATGCTGTGATAACGTCTCTAGGAACCTTGTGCAAGACTGCTTTCGTATTACTCCGTCTTCTGATTTCCGGTAAAT<br/> ATCTTGGCTTCCCCATCCTTAACCGTAATCCTAGAGCTGCTGACTTTCATTACATCCTTGACAACATGAGGAAAAA<br/> ACTTTCCAGTTGGAAGGTGAACTTTCTGACCACTGCAGGACGCATCACTCTTGCTAAATCTACCCTTAATGCCATT<br/> CCGGCCTACGCTATGCAATACTTCCAACCTTCCATGAAGATTTGTAACACTATTGATAAAATTCAACGCGATTTTCT<br/> TTGGGGTTCCACAACCCACTACATTGCTTGGGAGAAAGTGACCTCCCCGAAAGATTGTGGAGGCCTAGGCTTAC<br/> AAAAAGCAGACACCAAGAACAAGCTCTCCTGACCGGTCTTGCTTGGTGCCTCATTACGAACCAATCTTCACTTT<br/> GGGCCAAAACCTTAATCATGAAGTATAAATCTCGAACTACTGCCCTTCCCATTCTTTATATGGAAAAACATTCTC<br/> CTTGGGAGTAATATTTGCTCGAAAGCAATTGCCTGGACTCCGACTAGAGGGCATGCAGATTATTA</p>                                                                                                                                                                                                                                                                     |
| 74 | yes |                                                                                                                                                        | <p>ATGCCGTCACCGATGTTTCCTGATCAACCACCAGTCAATTTCTGTCGTCACCTGTAATTCCTGATCAACCGCCAG<br/> AAATATTTCTTCCATCACCGTTAGTTCCCGATCAAGCACCGCCAGTTGCAGTAATTCGCCATTTGAGTTTCCGCC<br/> TCAGCCGGACTCGCCACCATTGCCTAA</p>                                                                                                                                                                                                                                                                                                                                                                                                                                                                                                                                                                                                                                                                                                                                                                                                                                                                                                                                                                                            |
| 75 | NO  |                                                                                                                                                        | <p>ATGGAATTAAGGTTGAATCGAAGCTGTGGGAGATGAGGCATCTTGAAGTGGAGTTGGCAAAAGAGCGTGCTGC<br/> TCGGTTGGAAGCAGAACAAAATTCAGAAGCAGCTCTAATGAACTTGAAAGATATGAGTTTAAAAAATGGGGAA<br/> TATTTATGTGCTTATTTTATGA</p>                                                                                                                                                                                                                                                                                                                                                                                                                                                                                                                                                                                                                                                                                                                                                                                                                                                                                                                                                                                                     |
| 76 | NO  |                                                                                                                                                        | <p>ATGCCTATACCTCCTCCCCCTTTTCTAAAAAATTAGTCAAGAAAATCGAGGAAGATCAATATCACAAATTTTATCTC<br/> GATGCTGAAGCAACTCTCAATTAACGTCCCTTTAATTAAGTTCTAGAACAATGTCAGGCTATGCAAAGTTCATG<br/> AAGGATCTAGTGACGAAGAAGTGGGCCGCTAGTTTTGAAGGAGATGATAAGTTGCAACATTATAGTGCCATAACC<br/> ACCATATCGTTCGTGCTGAAGAAGGAGGATCCTTGA</p>                                                                                                                                                                                                                                                                                                                                                                                                                                                                                                                                                                                                                                                                                                                                                                                                                                                                                                 |
| 77 | NO  | <p>GO:0003676;<br/> nucleic acid<br/> binding;<br/> Molecular<br/> Function;GO:000<br/> 8270; zinc ion<br/> binding;<br/> Molecular<br/> Function;</p> | <p>ATGACACACTCTGCTGTTTGGATTTCGTCTTCCACAACACTACCAACGAAATTTTATGATGGTTCGCTGGTACAAAAGA<br/> TAGGAGGGGCAATAGGTAAATTGTTAAAAGTCGATGCATGTACGAGTGCCACACTCAAGGGTAGATATGCTCGCC<br/> TATGTGTGGAGGTTCCAATGGACGTCCCTGTTATCAACAAAATTCAAATTTGGGTCCCATACGCAGACAATAACATA<br/> TGAAGGAGAAGGTTTATTATGCAAAACATGTGGGCGCCTAGGTACCTGCAAGCAAATTGTCAGTACATTCCGGT<br/> ATCCAAGACAGATGCTGGCAATAGCGATAGCTCCTCCAGCATAACATGAACCATCACTGAATACCAACCATGACTG<br/> GAAGACGATATCTTTTATGAAGAAAGGGAAACCCATGGTCTCACAGAAAGATCATAGTGTACGCACAGAGCAAC<br/> AAAGTACACGCACAGAGTGGCCCTTACCGGAAAAGAACTCATGTATCAATGTCAAATATTTTTCAGCGGAACCTG<br/> TAAGTTGCCAACACGCTCTGGTGGTGGCGACGCAACCTCTGCATCAACTTCACCAAGCACAATCTTAGATAGAA<br/> CTTGGACTGAAAGACCAGGCGGTCTTTTTTACGATAGATATAAACGGGGTGAATACAATGATAATCCTCCGAAAC<br/> CCCAGCTTCTAGCTCAGCTGGTACAGAAAGGTATGAAGCTGGCGATGGACAACACTATGTGAACCATCTCTAGATG<br/> GAAAACATGTTGAATCCTCTCGCCCCAGCTGTGGCACCAACCCTCTATCACAAACATGCAACCACTCTGGAACCTA<br/> CCACACTACTTCAATACGCCATTGAGCTTGAACCCTCTAGCCCAACTACTATTCTTCACTCCCCAAGAGGTCTTAG<br/> ATGGCAACCCACTTTTCTTTCCATGGGTTCCAATACCTCTTTCAGGGACACGCAACTCAAATCCCTCTCCAATGCC<br/> AATGGACAGTCACCAGCCGCAATATGGCAGACTGGGAACGAAGTGCAAGAGGAAGCTCCGAAGGGTTCTCTC<br/> TCTGA</p> |

78 yes ATGATTGGAAATCCACTTAAAGTAGATAGAGCAACAACCTCAAAAGGAAAGGCTGACATATGCAAGAGTGCTGAT  
AGAGGTACCCCTAAACAAAGAGTATCCAACAGAGATAATGTTTGAGAATGAAGTAGGGAGGATAATCAATCAA  
GAGTGGAGTATGAATGGAAACCGGTACTATGTGGCAAGTGTA AAAACTTTGGGCATGATATAAGTAATTGTAGAA  
GACACATAAGAGATGAACAACAAGGGAAGATAGTTGGGACTGAGGGAAATAAGGAAAATGAAAGGAATAATGA  
GAAGGAAATTCAGAATGTGCAAGAGAAGGTCAAAGGAATAGGAAGGAAGAGGGGAAATGGAAGAGAAGGAAT  
TATGTGGGAACAACATAAAAAGAGTTTGTATTGAAACTACTAATTCTTTTAGTGCATTGGAGAAGGAACAAGG  
AGGTCAGACCATTTTTTAA

79 NO ATGACAGTTGGATCGAGACTAAATAAGGATGTTTCATGAATCCTTGGTTATGTATGCTGGAAGAGGTAATCAATTCA  
TGGGAAAACCATGATTCTGTGATATATCCTGGAAATGAAAGAGGTGTTTACAGTTTTATGGGGGATAATTCTCA  
GATGACTAATTCAATGATATACCCTGGTAATGGAAGAGGTACTCACTATGATCCAATGGCATTTTACTGACGA  
GGTGGATATTTAAGTGGTGGAAATAGCAACTACAATACTACAAGTTAAATAAGAACTGA

80 yes ATGAAACCACGAGATATGGGATTCGCTCTTACTGTTAAGACGTCTGAAACTCTTCTTTCTTTACTACTTTCCGCATC  
GGGGCTGATAAGACGAATGCATGAGGATCAAGATGGGGATGTCGTCCCCTCCTCAGTACGAAGAAGAGAGGGTA  
CTTGTAAGGATTGCGTGAATCCAGACAGTCTCACATTGAAAGCCCGTGTAAGGAATCATTACAGTAA

81 yes ATGACTAACTTCATTACTACTTTTTGCCACCCTTCTGATCAAGCTTCATCAATCCTCACATATCCTATTCAATCCTCC  
CTATCTTATGATTTCTTACAGCCCTCTTACAAATCCTCTCTTGCAGCTTTCACCTCTGTGTTTGAACCTAAGACATT  
TCAGGAGGCTTCTACTGATCCTCTATGGATTGAAGCCATGCAATCAGAGATCAATGCCCTTCAAGACAATAACACA  
TGGGAATTAGTTTTATTGCCTCCACGGAAGTTCCAATTGGTTGCAAGTGGGTTTTCAAATCAAATACCATGCTA  
ATGGTGAGGTGGAGAGGTATAAGGCTAGGTTGGTGACAAAAGGTTATAATCAACTTGAGGGACTGGACTACCAC  
GAGACTTTCTCCCATGTGGTAAAGATTGTCAGTGTAGGACTGTCATATCTATAGCTGCTTCTGCTGGTAGTTCTAT  
TGAGCAAATGGATGTCCACAATGCTTTCTTGATG

82 yes ATGTATGTGGTGGGAGAACCACCGACTATCGCTGCAGTGGAGAGATACATTGCTACCCAGGTAAACACAGTCAGT  
AAGCCCAAGGTGTACTACCATAACGACGGTTATTTCTGGTACAATTTAATAGCATGGATGATAGGAATGAGCTCT  
TATATTCAGGTCCTCATATGATGCATACTAAACCAATCATTGTTACACCATGGTCTGCGGATTTTGATTTAATAAGG  
AAATACTACAGATTGTGCATGTTTGGGTAAAATATCCAAACCTACCTCTGAATTGCTGGAGTGGGGATTGCTTAG  
CAGGATAAGCAGTGGTTTGGGGATTTCACTATATGCAGATGAATGCACCTCAAAAGTTGATAGAATCTCTTATGCA  
CGAGTACTCATTGAAATGGATGTGGCTAGGGAGTTACCTAAGAAAATTAAGGTGGAGGATCCGAATGGAAGAAC  
CTTTTAG

83 NO ATGAGGCGCATCCAGGAACTCCACATGGAGTTTATCTTTGCTCAGCCCCTGAGTGCAACTTGCATGTGGTTAAG  
GAGTTTTATGCCAATTGGGCGATGGAGTTGAGGTCGCACTTTGTGAATGTGCAGGGAGTGAATGTGACCCTCACT  
CAAGCTCTATTGAATGACATATTGGGAAATGTAGCTCACATTGACCCGTTGGTGCTGATGGGATTAAGCATAACGAC  
CTCCGTACCGAGCCATTCAACACACGCTTTGTGGACCTCAGTCAATGGTTCAGTGGACCAACACAGCTCGAAG  
AGGTGTAACCAATCTCTTCTTCTGCACACATGACTAGAGAGGCTCAGTATGTATGGGCTGGAATGCTGAGACA  
CTAGAATGGATATCGGCCTTCCGTTCCAGGAGCAGTTGGGGCAAGTTGA

|    |     |                                                                                                                                                                                                                               |                                                                                                                                                                                                                                                                                                                                                                                                                                                                                                                                                                                                                                                                                                                                                                    |
|----|-----|-------------------------------------------------------------------------------------------------------------------------------------------------------------------------------------------------------------------------------|--------------------------------------------------------------------------------------------------------------------------------------------------------------------------------------------------------------------------------------------------------------------------------------------------------------------------------------------------------------------------------------------------------------------------------------------------------------------------------------------------------------------------------------------------------------------------------------------------------------------------------------------------------------------------------------------------------------------------------------------------------------------|
| 84 | yes |                                                                                                                                                                                                                               | ATGGGGTCTGTTGCAGCATCTCTTCCTGATGTCAACAGAATAACTCTGCACAAAGGCTCTCAACTAACTATGAA<br>CAAAAAGTATGATATGTCAGGAGGTTACAGATAAGAAAATTTATGATGGATTATGGGCTATTGGAGAGGATAAAG<br>CTACGAGGGTTGATGGATTTAATGCATGCTTCAATAAGAAAGCTTGGCCTCACATTAAGGAGGAGTTACTAGAAG<br>CAGTAAAGGATTTTTTCAACACGGGACATATTTATAAAGCTATCAATTGTACGTCTATTACTTTGATTCCGAAAGTT<br>CCAAATCTACCGGTATTAAGGAATTTAGACCAATTTCTGTGGAACACATTTTTGATATGGCTGCAGAAACATCACT<br>TCACAGCAGGCACCTGGGATCAATATGTGGATTGGGCTATCTGTAATGCTAAAGGGAAATCCCAAGCAGCAGCAA<br>TTTTCAAGTTGATCTATGCCGAGGTGATGTATAATGTTTGGAGAGAAAGGAACTGTAAAGTCTTTGAGAAACAGA<br>TCAAGCAAATTGAAGTTCTTGCCAAAGAGGTGGATTTTTTCTGTACTGCTAAAGGAATTTCTTTTTTGGCTACTA<br>G                                                                                                        |
| 85 | NO  |                                                                                                                                                                                                                               | ATGCATGAGGTTTGTCCCAAGATCAAATCGATGAACTCGGGGAAAGTATCGATGAAGTGGATTATAGTGGAGAT<br>TCATTGGATGTGGTATTATTGAATTATGATGAAGAAGAGATTAGTGACTATGATGAGGTGGTTGATTCTCATGTCGA<br>TGTGGGGTCTTCACATCAAATCCAAAGAAGCTAGACATTGTTTTTTAAATCATGAAGTGCCTCCAGCCAAGCA<br>ATCCATAATTGTAATCCAAAATTAGAGTTGAAATGGCTTCTTCCAAATCTTTGA                                                                                                                                                                                                                                                                                                                                                                                                                                                                 |
| 86 | NO  |                                                                                                                                                                                                                               | ATGGAATGTAGAATCTTACATCCAAAAGTAAAGAGAAGAAGTTGACAGAAAAGTGGCAGAAGAGTCCTATGA<br>TGCAGATGCCGATAGTAAACTCTCATTCAAAGGAGTTTCATCAATGGGAGGGTGGTATTCACCAAATGGACTGT<br>GACTAATAGAAGGTTCAATGCTGATAAAGGAAAATAATGGATGAGCCACAATCTAAGGTCACTTCTGAGAACCT<br>TTTTGATGTGTTACAAGATGAGGAAGATTCAAATAAGGAGAAGATACAAGAGGCTGAGCATGGGAGATGA                                                                                                                                                                                                                                                                                                                                                                                                                                                     |
| 87 | NO  | GO:0003723;<br>RNA binding;<br>Molecular<br>Function;GO:000<br>3964; RNA-<br>directed DNA<br>polymerase<br>activity;<br>Molecular<br>Function;GO:000<br>6278; RNA-<br>dependent DNA<br>replication;<br>Biological<br>Process; | ATGATGCCATGGAATGGAATCGAAACAACATTTGGTAACATATCCATAAAAAGAAAAAATATTGAGACGGTTA<br>GAAGAGATCCAAATGTCCAAAATTACAGCCATAGCCCTTTCTAGCAAATTTGGAAAATGACCTTATCAAGGAA<br>TATAACTACATTTTACGTATCGAAGAGGACTTCTGGCAACTAAAATCAAGAGTTAACTGGCTAAATGAAGGGGAT<br>GCTAACACTAAATTTCTCCATACAACCACCTCACTAGAAGAAGAAGGAAAAAATTATAGCCTTACAATCAGAC<br>CAAGGTGAATGGACTTATAATCATGCCGAGATTATAAACTCTACCTATGATTTCTTCAAAAATCTATTTACCACCAA<br>TAAGTTGTTCTTTATAGGACCACCCAACCACCTCAAACCCCTGTAACCCCATAGATCTCTCCAGCTTAGACGAT<br>ATTCCCACTGAAAAAGAAATATTAGGTGTGGTCCAATCTTTCCAGCCCTTCAAGGCACCTGGACCTGACGGACTT<br>CACTCCTTCTTTTACCAAAGGTATAATGAAACCCACATCTTCTTAATACCAAAAATAAAAAATGCTAATAAGTTGA<br>AGGAATTTTCGACCTATAAACCTTTGTAACACAGCATAACAAGATAATTACCAAAATTTTACAAAAGGCTTAGTCC<br>CATCATGGTAAACTAATTGGGCCTTGCTAG |
| 88 | yes |                                                                                                                                                                                                                               | ATGAGAATTGGACTCCAACACTGTTCTCTCTTGAATTTTCGTTTCTCCGAGAATCTTTTAGAGGTAAGAGAAAA<br>AATAGAAAATTTCCCAACGCCATGATTGTCATATTGTCAGCCGCGAGAGCCGGATGTTTGACATGATATTAAGAT<br>TTCTTGAGTACTCTTACTCATTTGATTCTATGTGA                                                                                                                                                                                                                                                                                                                                                                                                                                                                                                                                                                   |

89 yes ATGGACCGCATTTTCGTATGCTTGTATATGTGTTGAAGTAGATGTATCGCAACCTCTAGTTGAAGCCATTGAGATGAT  
TACGCCTACTTGC AATTTCCATCAGCCTATTGAGTATGACTGGAAACCCAAATTTTGTGGACATTGTCTTCGATTTG  
GCCATCAAACAGATGAGTGTAGATCTGGACAGGACAACCCCCAGAAAGAGGAATTTAAGGAGGGTCAAAAAGAG  
GAAGAAAAGGAATAGAAGAAGAAGGAAACATGTGCAACAAGGCTGGAAAGTAAAGGAACCTTCCAAAGAAGC  
AGTAAAAGATGATATGCAAAAAGTAACTACTGTGAATCCAGTGCAGAGTGTGGTGGGACAACCTAAGCAAGTTG  
AACCTAGTACTTCCAGGGTGGGAACAAATTACCTAGCATCAGGGGTGTCTGATCACTCCCCGGTGTATTACACT  
GCACACCAGGTGTGATTTCTAGGCCAAAGCCCTTCAAGTTATTCAAATTTGTCCTGGAGCATCCTAAATTTGTTGA  
TATTGTCGCTGATACATGGGCACAAAGGTATAATGGCACAAGGATGTATCAACTGCAAAGAAAAGTCAAAGCACT  
GAAGGTTAACCTAAAGGACCTCAACACTTATCTAGTATCCTGA

90 NO ATGGAGAACCAGGTAGCCATGATCATTATCCAACACCCGATACTCCTTGCTCAGATAGTGTCCGATGGGATGCGTG  
CGGCAATAAAGACTTTCAACACTCATGTTTGGATGTCGCATGCTCTCACTCTCAATGAGCTACCAGTTTCTGGT  
GATGCTATTCTTCCATGTCTTAACATGGGAAGCCCCTATCCCACCACCCCTTAGCCTTCTCCCACGCTCTGAACCTC  
CAGGAAATAGACCCCATCTTTCACCACTGGATGATGCAAGGACCACACCAGAATGCTGCCCACTATCTCCGATA  
TCGACATTGCCGGAATCAATGGGCAACACAGTTGCTCCATGGGTCCCCGTCATCAACTGCATCACATGTACCT  
CCTTTGAACCCACCACCCTTTGTCCAATGATTACCAGTACCCGAGAGATAGAAGAAACATTAGAGTTAATGAGA  
GAAACTCGAATGGAGATTTTCGGTTCTAAAAGAAATAAGACTAATGATATACAAAGAGAGATTCGACAAAAATACA  
TCATTAGTTATCCGCAGAACCTCTTACAAAGTTCGATAGATATCAAAGCACCTTTCAATCCGGAAGTAGGGAAATA  
TGTGCTAATCATGAACCTACAATGA

91 NO ATGGGGTATGTACTTATTGACACTACTTGGCTTAAAAAGGACTCTGTGAAGGTCAGGATAGAATCCATCAAACCC  
GCAAGGATCTCTGTTGACTCTGCTGCTATTTGGATGAAGGACTCGAATGAGATTAAGGCACGTTTAACTGCTCTTG  
AAGAAGAAATCAGCACTGATGTTGGCAAATTACACTTAGCGATGACCAATCTGAAGCAGGATGGTATCTCTACTG  
TGCATAAACTGATCAAGCAGGTTGACTCTCTCAAGTCTGGAGTCAGCTTTCCAACACAGACCTTGTGTGATTG  
TTCAGAATTCATACTCATCCTTTTCCAAGAATGTTGAGCGCTCTTACAATACCTTCTGCAGGAATGTGCTCAACAC  
TCTCAATATTTTCTTGGTGATCGCTGA

92 yes ATGCCCTGCCAGGGTGTTCATGTGCTGAGTCTAAGAAGTTTCAAGAGCATTGTGAGTATCAACGACTTCTAGAG  
TTTCTAATGGGGTTGAATGAGACCTATGTTGCAGCCAGAGGTCAGATCCTTATGCAAACCTCCAATCTAA  
ATAAGGCCTTCTCCTTCATCATGGATCATGAGAGTCAAAGGAACTTGGCACACATCGGTAGTGATGGTTCTTTACC  
AAGGATTGTGGAAAGCTCTGCTTTACTGAGCCAGAAAGGAGTAAGTGGACCTCGTCTGAGTGGTCACATCAACC  
AGGAGAATGTGGTTAAAGGCTATCCAGTTGGCTGGAGATCCAAAAGAAAACTGGAGGCTTAAATTCCTATGCTA  
ATAATGCTGAAGTTACTCAAAGTGCAGGTTCTCAAACACTGGAGAGAGTACTGGAGCTAATGTCCCTTCATCAC  
CTACAGCTTTCTTCACACAAGATCAATACCAACAAATTTGCATTTGCTGACAAAAGGAAGTGACATTGGTGGAG  
ATCCGTCAACCAGTGGAGAGTAG



|    |     |                                                                                                                                                                    |                                                                                                                                                                                                                                                                                                                                                                                                                                                                                                                                                                                                                                                                                                                                                                                                                                                                                                                                                                                                                                                                                                                                                                                                                                                                                                                                                                                                                                                                                                                                                                                                                                            |
|----|-----|--------------------------------------------------------------------------------------------------------------------------------------------------------------------|--------------------------------------------------------------------------------------------------------------------------------------------------------------------------------------------------------------------------------------------------------------------------------------------------------------------------------------------------------------------------------------------------------------------------------------------------------------------------------------------------------------------------------------------------------------------------------------------------------------------------------------------------------------------------------------------------------------------------------------------------------------------------------------------------------------------------------------------------------------------------------------------------------------------------------------------------------------------------------------------------------------------------------------------------------------------------------------------------------------------------------------------------------------------------------------------------------------------------------------------------------------------------------------------------------------------------------------------------------------------------------------------------------------------------------------------------------------------------------------------------------------------------------------------------------------------------------------------------------------------------------------------|
| 93 | yes |                                                                                                                                                                    | <p>ATGAAGAACTGATCAGTGAAGAATTAGCTAAAAGACCAAACACAGGACAGAATGTGCCTAGCGTTGTGGCCCG<br/> TCTGATGGGACTGGATTCAATATCTGTAGATGAGGAGAGGTTGAGCGAGGTTTCCTCGAGACAAACAGTTTTTGA<br/> TTCCTTTGACAGACGGAGTAGTAATAGCCTGAAGTTCAACGAACTTAAACCCCGAGAACATCCACAGGAAGAGG<br/> AACTACAAAAGTTTAAAGAAAGAGTTTGAAGCATAACAAGCAGCAAGGTCCAAGGAATGCTCAAAGTTTGTGAA<br/> CTTAGCACCAACACGGTTCTCTACGCGAACTCAACAAGAAAGATGGTACTGAGAGATCTATAGATCTTAAAGGA<br/> CTTGCTGCAACAGAAAATATACACGAAAGAGGTTATTCGAAGGTTTCAGAAAGATAAAAATGAATTTCTTGCAGCT<br/> GCACGAAATAAGACTATTCGTGCATTGAACGTTAAGTCGGGTTCTGCTCCTGCAAAGATTGTAATTTTGGGCCTG<br/> TTTCCGACAGGACGGGGAAAAATGAAGAATCATGGGCTAATTCTCCTAGAATATCCGAAGACGGGAGTAGCATGG<br/> AAGAATTTCTTCAGGAGGTTAAGGAAAGACTAAAATTTGAATTGCAAGAGAAGAGTTACCAAAAAATCATTGAG<br/> AAGCCATCAGATGCAAAGATAATAGCTCAATGTATTGCAAACAGGCGGAGAGAGTGTACTAGGGACGTTGG<br/> ACCGACTCACCACCGATCAGAATCAATGCAGTCTTATAGAAGTGAATCCAACACGACGAGGCTAGCTCACCTG<br/> AATTCAGTAATAGAGATAACAAGAAGATTTTACAGAAAGGTTGAGGAATGTCCTGAGGGACGAATCATCTCATG<br/> ATATGGACAAACATGGTCGTGTAAGCTCCAGATCAGTAACACAGAATAGGGAAAAGAGCAAAGCTGAAGAAATC<br/> AGATATGCTTCGAATGAAGTGTGCCACGGGGACGATATGAAAGATGAATCAGACAGGCAGTGCAGATATTCCAGG<br/> CAGGAGCTAGGTAATGATGTTATGCTAGACCAAAAATTTTACAGGAACCTGGTTAGATCTTTATCAGCTCCCG<br/> TATCACGATCATCATTTGGAAAACCTTCTCCTGGAAGATCAAGATATGTTAACGGGGGCTCATATTAGGAGAAAGCA<br/> CGAAGCTATCGAGGAGGTCACAGTGAACGTTAAGAAATGGCGAAAAGAGAAATCAATCTTAAGGAAAAAGTTT<br/> CCAGCTTTAAGTATAGTTTTATACTTAAAGGAAAGCTCTTTGGTAGAAAATTTCAATCTTTGGAGGAATCACATGG<br/> AAACAAACAATGCACATGAAAGATCTTCAGAGCACACACTGTTGCATCCAAATTTTATGTGAGACAAGTAA<br/> GAAGCTTCAACTGTCTCTTTCTTTTCGACTATTGAAAATTTTGAAGATAA</p> |
| 94 | NO  |                                                                                                                                                                    | <p>ATGTTTGAAGTTTTTCAGGCAAGCCCCAAGAATCACATATGAAGGCAGCAAAGCGCATCTTGGGATATCTAAAG<br/> GAAACACTTGACCTAGTCTTGTACTACCCTACTGAAGATTCCTTTGATCTGGTTGGATATGCCGATGCAGACTATA<br/> GAGGGTACCTGGTCGATAGAAACAGCACTTCAGGATGGCTCACTTTCTGGGGTCATCACTAA</p>                                                                                                                                                                                                                                                                                                                                                                                                                                                                                                                                                                                                                                                                                                                                                                                                                                                                                                                                                                                                                                                                                                                                                                                                                                                                                                                                                                                                    |
| 95 | NO  | <p>GO:0003676;<br/> nucleic acid<br/> binding;<br/> Molecular<br/> Function;GO:000<br/> 4523;<br/> ribonuclease H<br/> activity;<br/> Molecular<br/> Function;</p> | <p>ATGTATGCAGAGGCGAAAAGTTTGGGACTAACCACGAACATGGTAGCAGAAGTCACAGCTATTCTACAGGCACT<br/> CAGATATTGTAGAAGAAAGAAGATCAATAATGTTCTTGTAGAAATAGACTCATTGGGTATAGTAAAAATGATAAGA<br/> AGGGAATGGAGGATTCATGGCAACAAACACAAAACATAAAGGAAATACAAGAGATATCGCAAGAGATAGATGC<br/> ACAAATCACACATATATTCAGGGAAGCAAATCAATTAGCAGATAAATTAGCTAATGAGGCGTGTGAGTCAATGG<br/> AAGCATAACGGCTAAACAATTTTCAACAACCTTTCAGTAGATTGTAGAAGAATTCTTAACTCAGATAAAGCACAAT<br/> TTCAACATGGAGGATAAGAACAAGAAGATAGGACAGAATATGCATTAA</p>                                                                                                                                                                                                                                                                                                                                                                                                                                                                                                                                                                                                                                                                                                                                                                                                                                                                                                                                                                                                                                                                                                                                                                 |

|     |     |                                                                                                                |                                                                                                                                                                                                                                                                                                                                                                                                                                                                                                                                                                                                                                                                                                                                                |
|-----|-----|----------------------------------------------------------------------------------------------------------------|------------------------------------------------------------------------------------------------------------------------------------------------------------------------------------------------------------------------------------------------------------------------------------------------------------------------------------------------------------------------------------------------------------------------------------------------------------------------------------------------------------------------------------------------------------------------------------------------------------------------------------------------------------------------------------------------------------------------------------------------|
| 96  | NO  |                                                                                                                | ATGGTGTGGGTTTCATGAATTCTACGAGGCCTATGCCAAGACACTCCTCAAGAAAAGAAAAGTCATGATTTGCAGACCTTTGGAGGAAATTAAGTCTGGGGTAAAATGGTAAAGTTTGACCGGACGTCTATTAATGACATATTGGGCATGGAAGGAATAACGCAGATATGTACAAGCTTCGCATAAAGCATAAGCTTGATGATTTGAAAGGGTGGTTGGTTTCGCTTGTGAGTCATGGAGGGTTGTTGACCTCTTATAGGGAGAGACTTGATAACCTTACCACTCGGGTTGAGGAGCAAGAGAGAGTAAGGGTGATTCTGCTTAGTTGGGAGAGCAGGCCGATGAGGATTATTTGGACGATGATCAGATCTGTGCATTGGCGCTACCAGAGCTACAAGGTATAGAGAAGTTGATTCAGCATCCTACATTGTGGAGATCTCATTTGTTGACCTTTGAGATTTCGACTAATGGGCGTGTCAATCAGTTTCAACTATCCTTCTCCCGATGTGCTCGACATTGATACCTCTAATTGATACTACACTCCTGATTCCTCCTCTAGATGTGTTGGGTACTAATTATCGAGTTGTTTCTACTCCCACCGAGCAACAGGGCTAG                                                                                                        |
| 97  | NO  | GO:0006508; proteolysis; Biological Process; GO:0008234; cysteine-type peptidase activity; Molecular Function; | ATGAATTTTTTGTATCCAGTTGAAGATTATGGAGTGGCCATTTCCGTTGCCGAGAGCAGTCCTTCAAGGGCAATAGATGCATGACGCCAGTGTCTCATCAATTTGGCATTAGTTTCGTGTGTGCCATTTGTCGTCTGTGACGCCGTTAGTGCAGTATCTGCACTGGAAGTTCCCTGGTCATTTACCGTGGAAGCAATCCACTCTCTAAGCAGGAGTTAGTGGATTGCGTTCCAGTTGACAGAAAGGGGGTTCATTTTGAACGTGTTTATAAATACGTAATACAAAGGGGGTTTACATTCAGAA TTCAACTATCCTTATAGGGCTCAGTATGGACTTCCTTGTCTGTGTTTTCCGTTACTGGAAAAGCACAAAGTCGGTATTTTTGGGTTATGAACCGCTCTTGAGCGATGCAGCAGTCATAGATGCTTTAGATAATGCTCCTGTGACCGCAACAATTTGTGTTTTATGAAAGTTTTTAAACCGTGGTCTACTATCGATGTTTATAACCAATTTGGAAGGTGAACAACCAAGTTGAATGAATTTGGGTGTGCATTTACACATGCCGTAATAATTATTGGTTCATGGCACATAAAGGATGAAAAGTATTA TATCATAAAAAATTCATGGGGATTGAATGGGGTCTTAAACGGCTATACACGTGTTTACCACGTATGCTATTCCATT TATTTGTCCGAGAGGTATTGAAATGTTGTAG |
| 98  | yes |                                                                                                                | ATGTCCTCGGAAAAGGAATTATTGAGTACCTTGAAGTTTTCTTACACAATCGGCTATATCTCTTGTGGGAACTATCTCCAGTTCTAGCAGCATTTGCAATTCCTTCATGGTATGAGATTCATATCCCGTTGTCTGTTGAGATTTCTCACAGTGAAGTGATCAATCCTTTTACACCAGTCAGCTTACAGACTTTATATTTTTCGGAGTTTATCGATGAATAG                                                                                                                                                                                                                                                                                                                                                                                                                                                                                                                  |
| 99  | NO  |                                                                                                                | ATGACTATTGCTATAATATCTGATGATCGGCAGGAGCAGGACAAAGGGTTGGAATTACTGGAACCTCTTCAGGTTGCTACTGCTTTAGAAGAAAGTCATCCACCTGCACAAATACAATAACAACCAAAAACATTTGGAGGATGGAAGTAGAGAATCAGAATGTGCTATAATACATGTGGGAGTTAAAAAATCAGTGCCAATGGGGACCTTGCATGCTTTAGTGTAG                                                                                                                                                                                                                                                                                                                                                                                                                                                                                                             |
| 100 | NO  |                                                                                                                | ATGGCACAAATTGCACCTTTCACCCCTTAGTCCTCTAGAATCAGCCTCTAACAATGAAGTATCCAATAGCTCGGAGCTCAGTTTGGAGCCACTATCGAACCACATTCACCCCAAGAGCGTAGATCTCAGATAGATAAAGTAGTTGAGCAGCATGATGCCACTCCTTCCCAGTCTGAAGAGGAGGGAGATGGCTCAGAGATTGAAAATGTGTCTGGACATGAATCCAATGTCTCTAGAAAATAATGTAGTTGGGACTGGGGTGTGGGTAACCAGATAGTTGATCGTCCCACCGATGCCACTA AATACACATCTGCCACCTTGATCAAAAACCTTGCAAATCCATTATATAGAACAAGAAAAGAGATAGATCCTACTAAGGAGAACTACCAGCTGATGCAAGTTCTAACACCACTCCAATACTAATGCCTAG                                                                                                                                                                                                                                                                                                |
| 101 | NO  |                                                                                                                | ATGGATGGCCTCTATGCTAGCTCTGAGTTCCTCAGAGCGTTGGATGTATTGCATAATGTGGCTGGGGATGCTGCTAAGGGAGGATTTTACTAG                                                                                                                                                                                                                                                                                                                                                                                                                                                                                                                                                                                                                                                  |

|     |     |                                                                                                                                                                                                                                                                                                                                                                                                                                                                                                                                                                                                                                                                                                                                                |
|-----|-----|------------------------------------------------------------------------------------------------------------------------------------------------------------------------------------------------------------------------------------------------------------------------------------------------------------------------------------------------------------------------------------------------------------------------------------------------------------------------------------------------------------------------------------------------------------------------------------------------------------------------------------------------------------------------------------------------------------------------------------------------|
| 102 | yes | ATGGGAGAAGAAAACAAGGTAACCTCTACATGGAATGTGGCTTAGCCCTTATGTGAAGAGAGTTGAACTGGCTCT<br>CAAGGTCAAAGGCATACCTTTTGAGTATATAGAAGAAGATTTAAGCAACAAAAGTCCATTGATCCTCAAATACAA<br>CCCAATTCATAAGAAAGTCCCTATACTTGTTCACAATGGAAAGCCAGTAAACGAGTCATTTGTCATCGTTGAATAC<br>ATAGACGAAACATGGAAGAATGGACCTCAACTCTTGCCAGAAGATCCTTATGAAAGATCCAAAGTCCGGTTCTGG<br>GCTGCTTATATTCAACAGGTGATGGAGTGCATGCTTAATATATTCACTGCAGAAGACCAAAAAAAGGCATGTAAG<br>GAATTCATCAGAAATTTAGCGTGCTTGAAGATGGATTGAAGACTTTTTTTCCAGGGGCAATCCTAAAATTGAAA<br>ACAGAAACATAGGGCTCGTAGACATTTGGATCGTCGTAGCATTGGCATGTGCAAAGCACAGGAAGAAGCATTG<br>GAGTGAACCTTCTGGATCCAGAAAAGGCTCCCCTGATTCTCTCATGGGTAAATAGTCTACTCGAATTGCCCTGCT<br>TAAAGAACTGTTCCCTAATCATGACAAGACGGTATCATTCTTCGAGTTTTGAAAGAAAGAAGTACTAATGGTCA<br>AGCTCACTGA |
| 103 | yes | ATGCTGGAGCAAGAGACACAAGAGGCGCAGGATCAAAGGAAAGGAGAAGCAGATGAAAACGAAAATCATGAA<br>GGGCTGGAAAATAAAGAGGCAATGGAAGCAACGCCGGGATAACATGGATGTGACAATATGGAAAATAGGAATAA<br>GAAACACACTAGAACAAGCAAACACTACTGCAATAGATTTGAACAGCAGCTCAAAGGCGAGAATACATCTGAAG<br>GCAGAAGAAGTGGATATAATTATGAACATCAGAAAGAAGGGATATCAGCAGAAAACAGTGAGGAGGTCGTATCA<br>ACAATGAAAAACAAGGGCAATAGGCTGGATGGAACAACCAATGTCAGTGCATCACGCATCGTGCTAGAGGCAAG<br>ATCAGAACCAGAAGAGGAAGATCACTATTCCAAAGGAATGAATGAGGAAGGAGTAGAATTAACATTACTGGGGG<br>AAGATGAATAG                                                                                                                                                                                                                                                  |
| 104 | NO  | ATGGGAGAGAAGGCTATAGAAAGACATGATAACATCAGTACCAACAACCCTTTTGATGTGCTTAATCAAAGGAG<br>CATGATGAAGCAACCAACATGGTCAAAAAATCCATACACAATAAGGAACAAAGAGGAAGGCTGGTAGTAGGGGT<br>CAACTTAGAAGTAGATAGCTCATACAAGGAACAATAAATTCTCACATCAACGTACCAAACATTGAGGTCGCACA<br>ACATAATGTTTCATAGCATTGCAAGGCATATTTTTATGAGAGATAGTAAACAAGGTAATGTTAAAGAAGGTGAAATA<br>ACTGAAGATGGAAAAAGCAGGTGGTAG                                                                                                                                                                                                                                                                                                                                                                                         |

105 yes

ATGATTAGAGCTTACGGAATGAGTGATTCACCGGGATATGGTTTTATGTTGTATCAAGAAATGCTAAGGTCAGGTG  
TGTCACCGAATTCTCTAACATCTTCATTCGTTACAAATTGTTGTATAAAGAGTGGGTCTTTATTTGGTGGGCTACAG  
ATTCATGCTCGAATTTTGAGAGATGGGCATCAATCTGATGGACGACTGCTGACCACATTGATGGATTTTTATTTCATC  
TAATGAGAAGTATAACCGAAGCTTGCAAAGTGTTCGATGAAATGTCTCATAGAGATAACAATAGCTTGGAAATGTGTTG  
ATTTCTGTATACATGCGTAACCGACGAACTCGGGATGTTTTGGGTGTATTTGATATGATGCAGAGCTCGTATGATTG  
CCAACCTGACAATGTTACTTGTGTTGATGTTACTTCAGGCTTGTGCAAATTTGAATGCATTGGCATTGTTGGTGAGAGA  
GTTTCATAGATATTGTGAAGAACATGGTTTTGACAAGGCAATGAATACTGTAATGCACTTATAACTATGTA CTCTCG  
GTGTGGTTGCCTCGAAAAGGCTTTTGAGGTGTTAAGGGAATGACCGAGAAAGATGTGGTGTCTTGGACTGCCA  
TGATATCGGGATTGGCTAGCAATGGTTATGGCAGAGATGCAATTGAGGCATTTTCGGGAGATGCAAAGTGCAGGTG  
TTTCCCCTGATGATCAGACTTTCCTGTTGTTCTTTCTGCTTGCAGTCACTCTGGACTACTTGATGAGGGTAGGAT  
GTTTTTCAATAGTATGAGCAAAGAGTTTGGGATTTACCAACATTTCATCATTATGGGTGTGTGGTTGATCTAATGG  
GTCGTGCTGGTATGGTTGATGAAGCTTACAACCTTATAAATTCGATGAAGGTCAAACCAGATGCAACAATATGGA  
GGACTCTACTAGGAGCTTGTAGGATTCATCACAAGCTGACCTAGGAGAACAAGTCATTGAGCGTTTGATAGAAC  
TTAAAGCACAGAAGCCGGAGACTATGTACTACTGTTGAATATTTATTCATCGCTTGGTGATTGGGGTAAGGTAAT  
GAACGTGAGAAAAATGATGAAAGACAGGGGAATCCAAACCAACCCTGCTTGTAGTACTATTGAGTTCAGAGGAA  
AAATACATCAATTCGTTGCAAATGACTTTTCGCACCCAAGAAAGACAGAAATTTACGAGATGTTGGATGAGATCA  
ATCAGCAACTGAGGATAGCAGGATACGTTGCTGAGACAGTGGCAGAGTTGCACAATGTGGGTACAGAAGAGAA  
GCAGATTGCATTATCTTATCACAGTGAGAAATTGGCTATAGCTTTTTCGGTTCTATCAACTCCACCTGGCAGTCA  
ATTAGAGTTGCAAAGACCTCCGGATTTGTGTTGACTGCCATAACTTTGCCAAGATATTGTCAGCAGTCTATAGTC  
GGGAAGTTGTTATTAGAGATCGGAACCGCTTCCATCATTTCAGAGAAGGTCGATGCTCGTGCAATGACTATTGGTA  
A

106 yes

ATGAGA ACTTTTTGTGAGCAGGGATGTCATCTTCCATGAAGATATATTTTTCTTTTCAGGCTCCAACAGGTGTGCATC  
CTGTTTCTACACTACCAGATTACTCCTTATTCACCAAGAAATCATCAGAAGGCATGGTTGTGATTCTAATATATATG  
GATGATCTCCTTATTACTAGAACTAGCCTTGCCTTAGTTCAAATAACATGGACCATGCTTCAGGGAGCCTTCAAGA  
TTAAGGACTTAGGTGAACTTAAGTTTTTTCTTGGTATTGTTATGCACCAACGCAAATATACCTTGGACCTTATCTCA  
GATATGAGACTTTCTGGTTCTCAATCTTTTGGGGCACCTGTTGAATTGAATCAGAACTCACA ACTACTGAATTC  
ACCATCATA CAGGGTCTACTGTTGATGAGTCATTAGATGATCCAGGTAGCTATCAAAGACTTGTAGGGAGATTGCT  
TTATTTGACAAACACAATGCCTGATATGTCTTTTTCGGGTGCAAAGTATTAGTCAATTCATGCACAATCCAAA ACT  
TCTCACATGAATGCAGCTATCAGGGTGGTCAGATATGTGAAGCACTGTCCAGGCTTAGGCATTTTTTTTGT CAGCTG  
CTAGTGCTCCAAAATTGGAGGCATTTTTCGATGCAGATTGGGGTTCTTTCCCAATACTAGAAGATCTATTACAGG  
TTACATGGTGAATTTTAGAGAATCTCTGATCTCGTGGAAGTCGAAGAAACATTCTACCATTTCCAGGAGCTCAATT  
GAGGTTGAGTATCAAAGCCTAGCCTCCACTGTTGCTGAGTTACTTCGCTGA

|     |     |                                                                                                           |                                                                                                                                                                                                                                                                                                                                                                                                                                                                                                                                                                                                                                                                                                                                                                                                                                                                                                                                                                                                                                                                                                                                                                                                                                                                                                                                                                                                                                                                                                                                                                                                                                                                                                                                                                                                                                                                                                                                                                                                                                                                                                                                                                                                                                                                             |
|-----|-----|-----------------------------------------------------------------------------------------------------------|-----------------------------------------------------------------------------------------------------------------------------------------------------------------------------------------------------------------------------------------------------------------------------------------------------------------------------------------------------------------------------------------------------------------------------------------------------------------------------------------------------------------------------------------------------------------------------------------------------------------------------------------------------------------------------------------------------------------------------------------------------------------------------------------------------------------------------------------------------------------------------------------------------------------------------------------------------------------------------------------------------------------------------------------------------------------------------------------------------------------------------------------------------------------------------------------------------------------------------------------------------------------------------------------------------------------------------------------------------------------------------------------------------------------------------------------------------------------------------------------------------------------------------------------------------------------------------------------------------------------------------------------------------------------------------------------------------------------------------------------------------------------------------------------------------------------------------------------------------------------------------------------------------------------------------------------------------------------------------------------------------------------------------------------------------------------------------------------------------------------------------------------------------------------------------------------------------------------------------------------------------------------------------|
| 107 | yes | GO:0005524;<br>ATP binding;<br>Molecular<br>Function;GO:000<br>6915; apoptosis;<br>Biological<br>Process; | <p>ATGCCTGGTCTTGGCAAACAACCTCTCGCAAATAAGGTTTTCAAGAGTAGTACTGTTGGATATACATTTGACAATC<br/>GCATTTGGGTATATGTCTCTCAATCGTACACCCGAAGAGACCTATTTCTAACATCATCAACCAATTCACCAGAAA<br/>CACTGAACAATATCGATATGTAAGTCTGAGGAGGCTCTAGCTGAAGTTATACGCGAACATTTGTTGCCAGGAAAGTAT<br/>CTGATTGTATTGGATGATGTGTGGACATGGGAACCTTTGGATGATGTCAAATTGCTTTACCAAACAAGATGAGAG<br/>GTAGTAAAGTCTTGTTTACCACTCGAGATGACAAGTTGGGTAAATTTTGTGCAATGAACCTCATCATTTAAAT<br/>CCTAACAGACAACGAATGCTGGGAGCTACTACAGAAGAAGTTTTCCACAAGGATAAATGTCCCGCGGATTTGG<br/>AAGAACTCGGGGAGCGCATAGCTAAGAAATGTATGGGGCTTCCCCTTGCAGCTTTGGTGATTGCGGGAGCCCTAA<br/>CCGGGAGAAGCAAGACAAAAAGTGAGTGGGAAATAGTGCATCAATATGTGAGTGAACACATTATTAGTAGTGATA<br/>TTATGATGACCAAGAAATTTGGTGCAGATGAGTTGTGATAGTTTGTCTGTCAACTGAAAGCTTGCTTCTTATATTG<br/>TGGTGCTTTTCTAAAGGTTCCGAGATCCCTGCTTGGAAAGATAGTCCGGTTGTGGATCGCGGAAGGGTTCATTTCG<br/>AGAAACAATGCAATCAACCGTTGAAATTGTAGCAGAGGGATACTTGAATGAACTTGTGAGCAAGAGCTTACTGAT<br/>GGTAGCACAAAGGACATCCAATGGCCAAATAAAAACATTCCGCGTGCATGACATGTTACATGAGTTCTGTACGCT<br/>CGAAGCAAGTGAGGAAAATCTTTTCAAAGAAATAAAAAGTGGTGTGAGCAATCTTTCCCTAGAAACCAGGTAT<br/>TAGCCACATTTGCGCCGCTTAGCATTGATTCTTCTGTTCAAGAATTCATTTCTACCAACCCTTATGGTGACAGCATT<br/>CGTTCATTCTCTGTTTCTCCTCTCGGAACATTGTGATGTCCCATATGAGTTAGAGACAATCCCGAAATCCTTTCC<br/>ACTACTCAGGGTTCTTGACATTGAGTCCATATTATTTGAGTTAGAGACAATCCCAAAATCCCATTCGAGAAGCAG<br/>TTTTTTCAGCTATATCATTGAGATACCTTGCTATATCGAGTGACTCGTTAAAGATCCTTCTAAATTCATGGAGGA<br/>CCTGTGGAATCTACAAACCCTCATAATTTGACTCAACAAGAGACATTGAACATAGAAGCAGACATATGTAACAT<br/>GCCACAATAAGGCATCTTCACACAAATGCCTCTGCTAAATTGTGTCCCTGTCTAAACAAGAAATCATAAC<br/>TTTACAAACTCTTTCTATAATAGAACCTGAAACCTTCACAGAGAATGTGTTGTTTGAAGGTGTGAAAATCTGAA<br/>GAAGTTGGGTATTCGTGGGGATATGGCCAAGTTGGTTGGGCTATTCGAGTTAGAATACCTCGAAAATGAAGCT<br/>AATGAATTTAGCAAGTGGGGGTTGCATCTTCGTTCCAGAAAATCTATCCCTCGGAGGTTAAAGCAGTTAACTTTA<br/>TCAGGTACCTGGTTTGACTGGAATGAGATACGCAGAGTAGTTGGCTATTTGGAGCTCCTCGAAGTGTCAAGGTG<br/>AAAGAGAATGCATTTACGGGGCATTATTGGGAGTTGAACGATTACGTGTTTCTTGTCTTAAGGTATTATGGATTG<br/>AAAGGTCAGAACTAGTTTATTGGAAGGCTTCTGATGAGAATTTCCGAGCTTAGAGAGGCTTATCCTTCGTAATTT<br/>AAATAAGCTTGGGGAAATCCCTATAAACTTTGCCAACATAAGGCACCTGAAAATGATGGAACCTGGTGAATACAAC<br/>CAAATCAACGGTTAAATCTGCCAGAAATATAGAATCCCGCAGTGATGCACTGGATTCAAGCTAACCATTTTTCT<br/>CCCGATAACAATCTCTGATTGCAACTAA</p> |
| 108 | NO  |                                                                                                           | <p>ATGGGGTTCGGAGAAAGATTCATCGACATGACTTGGAGGATCATGGCTAATAATTGGTACTCTATAATTGTCAATG<br/>GAGCTAGACATGAGTTATTTCACTTAGAGGGCTCAAGCAAGGAGATCCACTTTACCTGCCCTTTTTTATTT<br/>TAGATACAAAGGTTCTTTCAAGGATGATGAACAGGTTGTAAGTAAATCCTCATTATCATGGATTTTATATGGAAATG<br/>AGATGACCTCAAGTCAACCACCTTAG</p>                                                                                                                                                                                                                                                                                                                                                                                                                                                                                                                                                                                                                                                                                                                                                                                                                                                                                                                                                                                                                                                                                                                                                                                                                                                                                                                                                                                                                                                                                                                                                                                                                                                                                                                                                                                                                                                                                                                                                                                            |
| 109 | NO  |                                                                                                           | <p>ATGATTCATTTGATGAAACCACGAGTTGTGCGGCCAACAACTCAATGTGGTGTGCCATACCACGACATTTTTTCA<br/>TCCATCAGGGATGCTCTTTTGTCTGCCTTTTCCGTCAGTGTGCTGCTCATCTGATTCTTCAGACCTTTTCAT<br/>TTTGATTCTACAGCATGGTTGTTTCCATGA</p>                                                                                                                                                                                                                                                                                                                                                                                                                                                                                                                                                                                                                                                                                                                                                                                                                                                                                                                                                                                                                                                                                                                                                                                                                                                                                                                                                                                                                                                                                                                                                                                                                                                                                                                                                                                                                                                                                                                                                                                                                                                                          |

|     |     |                                                                   |                                                                                                                                                                                                                                                                                                                                                                                                                                                                                                                                                                                                                                                                                                                                                                                                                                                                                                                                          |
|-----|-----|-------------------------------------------------------------------|------------------------------------------------------------------------------------------------------------------------------------------------------------------------------------------------------------------------------------------------------------------------------------------------------------------------------------------------------------------------------------------------------------------------------------------------------------------------------------------------------------------------------------------------------------------------------------------------------------------------------------------------------------------------------------------------------------------------------------------------------------------------------------------------------------------------------------------------------------------------------------------------------------------------------------------|
| 110 | yes |                                                                   | <p>ATGCTCATTGACGTTTTTGGTGTAACACATCTTGTATATCCTCTCATGGAGGAAGTTGCAATCCAGGGGAAAGAAA<br/> GAAACCAGAGCTTGGAGTTTGGTTCGCGGAGATTTTCGGTTCGAGTGACTCGATCGGTGCAACGTACTCGGGAT<br/> GGAGTACTTGCTAAATCTACCAAGAAAATTCGTCCAGTGAAAAGAAGTTCCAAGGCACAAGTAGAAAATTATGA<br/> GATTGATGTTAACTCTGAAATACATAAGGCTAGGGTATTGTCATTTGGGAAAAGAAGTGTGATTTCGAGGTTCGGGTT<br/> GTTACTGGGTTTGGGGTGGTGTTCATGAGTGAACACTACTAGTCTGTAGAAAGCCCAAGGGTGGACTGCCTTATTC<br/> CTTTAA</p>                                                                                                                                                                                                                                                                                                                                                                                                                                                                                                    |
| 111 | NO  |                                                                   | <p>ATGCCAAGAATTCCTTAAACTCTCAGAGGAGAAGAGCAAACCTCGAGGCGCTCTCCTCGACGATCGATCCCCGT<br/> GAACTCCCCTGCCCTTCCCCTCAATTCAACATGAACCATCAACAACCAGCTATATTCCAAACCATAACCAATAAC<br/> AATGGGGGGTTCATACCTTTTATGCAACCCAAGCAGGAACTAAACCAACACCCCCACTCTTGGTTGGAACCTGA<br/> GCCTCCAAGGCCAAGCTTTATCATTAGTGCAGGAAAGTGGAAAGGGAGGAATGTGGTTCGTACTAGTGCAGAACCCG<br/> ACTTTCCTAGCCCAAGTAGTATTGGAGGGTATGAGGCTTGAATAGAGACCTACAACAACCATTTATGGTTGTCGA<br/> CGGTCTACAACCCCTTCTGAACCTTCTTCCCCCAAATTCCTTTTTACCATCACTCGACCTGGGAAATACCTCT<br/> CCTTAA</p>                                                                                                                                                                                                                                                                                                                                                                                                                        |
| 112 | NO  |                                                                   | <p>ATGTTTCATCCAAGAACCTATGGTTAATGCGAGGAAGATTGATAGATTCAAAGAATCCTTGAGTATCAACATTGTG<br/> CCCACAATATTTCCAATAAGATATGGATCTTTTGGAAATAATGATCATCAGATAGACATCCTGAAAGACAAAGATCA<br/> ACATATGCTCCTTCATATATCCAAGTCCAACCTATAATATCTTTTACATTAGTGTGTGTATGCTAAATGTGATGA<br/> GGAATTAAGGAGAGAATTATGGGATGACCTTAGAGACATTGCTAACAATGTTAATGGACTATGGGGAGTGATTGG<br/> AGACTTCAATGTCATTACAAAAGCTGAAGAAAAAACAGGTGGAAGACCCTATAAAGCTGAAGAAAGTATTGACT<br/> TCCTTTCCTGCTTAACTGATTACAATCTTCAAGATGGTGGTTATTTGGGATCTAGATTTACGTGGAGTGACAATAGG<br/> GATCCTCCCAATACCATCTGGAAAAGATTGGATAGACTAGCCTACAATGATCAATGGTTTGTGATGTCTTTGGAGGCA<br/> CTACTGTTACTCATCTTTCAAGGACCTGTTCTGATCATGCCCTCTCCTGATCAATTGTGATACCAACAACCTTAAC<br/> CACATCAAGTACTTCAAATTTCTAATGTTTGGACTGAGCATGAAGAGTACTTACCTATTGTCCAAAAAGCTTGGG<br/> ATGAAGCCCAAATTGGCAACCCCTTTTTCTGCCTTCACCAAAAAATTAA</p>                                                                                                                |
| 113 | yes | GO:0003676;<br>nucleic acid<br>binding;<br>Molecular<br>Function; | <p>ATGGTTCTGCAAATCTCTCTCGTCGACCTGAAGAAGGAAAACAGGAGAAGAGGAAAGGAACTCAAGTACAACG<br/> AATCAAGGTGGATCTACGATCCATAACAATGTCTACGTGATGAACATCGTATCCTCACTGTTGTCACCGGCAACTA<br/> CAAGACCGTCGCCAAATGGATCAAGGAGGTTGAGAATACGGCTCCAATAGCAAACATGGTTTTATTTTCGTAC<br/> AATCTGTGTCGAGCGCGATCCCGATATGAGTGGGAACCACTGGGAGATTAAAGATGGCGAGGACTATCCCTACGA<br/> CCTCCTTCAGGTTTGCACAGGCTCTCACTGCTTACTCTACCGCCTTCTTCCCTAAGTACGACGATGATCCTATTC<br/> CCAAGGCTATGAAAGACTTCTTCGCTGATCCTAGGGTTATGGTTATTGGAATGAAAATGCGTCGTATTATGAACAG<br/> GCTTGATGCTGACTTTGATATCAAGTTTGGTAACCCTGTGGACATCAATATTTAGCTGAGCTAGGTTTGCAGAGG<br/> CATGATTTGGATCTACGCCATTATGACCTTAATCGTCTATCCATGACTGTTATGGGAAAATACTGGGACGTGATCAG<br/> GCCTGAAAAGCCGATAGCGTGGTTCGCCAAGGAGGCACGTTGGTGGAGAGATCCTATGAATCCCGAGAAGATAA<br/> AATATGCTACCGTGGATCCCTATCTGTGTTTTATGGTTAGTTCTAAAATTCTGGATGGGATGGATGATACGTGGTAC<br/> CCTGAAGATTTTGGAGATTTCTGGATAAGAAAAAGAAGAAGAAAAGCAAGAGCAAGAATAAGCGGAAGAAGA<br/> AATTCTGA</p> |

|     |     |                                                                                                                                                                                                                                                                  |                                                                                                                                                                                                                                                                                                                                                                                                                                                                                         |
|-----|-----|------------------------------------------------------------------------------------------------------------------------------------------------------------------------------------------------------------------------------------------------------------------|-----------------------------------------------------------------------------------------------------------------------------------------------------------------------------------------------------------------------------------------------------------------------------------------------------------------------------------------------------------------------------------------------------------------------------------------------------------------------------------------|
| 114 | yes |                                                                                                                                                                                                                                                                  | <p>ATGGACGTGGTTAAATTTAATGTTACTATGGTGTATGGGTATAATGATCAAGCTATGAGGATGACTGTGTGGAATGA<br/> AATAATTGGAATCAAGAATAACATATGTGGACCTTGGGCAGTAATGAGGGATTTAATTGTGTGCTGAATATTAATG<br/> AAAGGATAGGGAGGCCTGTCAAAATGGCAGAAATAAGAGACTTTAGGAATTGCGTTGATGAATGTGAGATACATG<br/> ATCTTAAGTCATCAGGATCTTTTTTCACTTGGGAATAATAAGCAGAAAGGGGAAGATAGGGTATGGAGTAAGATTGA<br/> TAGGGTATTGGTGAATGTGGAATGGCTTACACAAATGCCAGCATCAGAAGTTCCTTAA</p>                                                                              |
| 115 | yes | <p>GO:0003723;<br/> RNA binding;<br/> Molecular<br/> Function;GO:000<br/> 3964; RNA-<br/> directed DNA<br/> polymerase<br/> activity;<br/> Molecular<br/> Function;GO:000<br/> 6278; RNA-<br/> dependent DNA<br/> replication;<br/> Biological<br/> Process;</p> | <p>GTAACAGAGATCGTTGTGAATCGCATTAAGCCTCTCATCCCCAACATCATAGGCCCAAGCCAAGCAAGCTTTCTTT<br/> CCAATAGGAGGGCCTCTGACAATGCAATCATTGTACATAAGGACATTTCTATTTTGGGAAAATGAAGGAAAAGA<br/> GCCCTAACATGATTCTCAAAATTGATCTTGAAAAGGCTTTTGATAGACTTGAATGGTCCTATATAAAGGAAACCAT<br/> GGCCTACATCCATATTCTCCCTAAGCTCTTCCAGCTCATCATGTCTTTGTTTCCATTAGTTCCATAGAAGTTCTCAT<br/> AAATGGAAGGAAAATAAATTCTTCCAACCATCAAGAGGAATTAGACAAGGAGATCCAATGTCCCCCTATCTCTT<br/> CATAATGTGCATGGAAAAGTTGCCTGGGAAATTGATGCTGCATTCATTGTAAAATAG</p> |

116      yes      GO:0003676; nucleic acid binding; Molecular Function;GO:0003677; DNA binding; Molecular Function;GO:0015074; DNA integration; Biological Process;

ATGCCTAACGTAGTTAATACTACTAGTACCGCTGGCACTCACTCGAATGCAAACACTGATAATGCTTTTGGTTTTTT  
TCCCTTCACTCTTGACCCATCGCACCCCTTTCTATATCCATCCTTCTGATAATCCTGGTAGTCAACTAGTGGCAGTAC  
CCTTCTCTGGTTGTAGTTTTGTTCTTTGGCGAAGTAGCATGCTCACTTCTCTGTCTGCCAAGAACAAATTAGGGGT  
GTTAGATGGTCGATATCCCCAACCTACACCAGATTCTCCCTATTATTCTTATTGGGAGAGGTGCAATGACATGATTA  
AGGCCTGGATAACCAACTCTGTTTCTAGAGAGGTAGCCACTAGCGTCATGTGTCTTCCGAACTACTAGAGAGGTAT  
GGTTGGATATCAATGAGTGTGTTGGTCCGTCGAATGGTTCCAAATATATCCAAATCCAAAGGGACATTAGTTCCAC  
AATTCAGGGCTCATTGACATAGCTACATATTTTACAAAATTGCGAACTCTTTGGGATGAACTCAATTCTTCTTATG  
TTGGACCTGATTGTACCTGTGGGGCTTTGGTCAAGTTCATAAAGGATCAGAGACTATTTCAATTTCTCAACGGACT  
GAATGATTCTTACTCTACTGTCAAAGCAACATTCTCATGATGAGACCTCTTCCACCGATAACCTCATTTTTTGCTC  
CATCCTCTTCATCTTCTGTATCCAATAGTGGCAGATCATAAATCAAAGGTGAATTTTGATCCCAAAAGGAATATC  
AACTCCTTGTTCTGTAGGTATTGCAAAGGCCAGGACACAGTGTGAAAAGTGTACAAACTCCATGGTTTTCTCCT  
CCAGACTTCAAATTCACCAAGAATAAAAGGTCAGCATCTTGTGTTCAAGCAGAGGGCTCAGTTGAGTTCTGGTGT  
CAGTTGAGCTCTGGCTCTCCCTCTACTTCTCTTAATCCATCTTCTGAGCCTACACCTCATGGATTTAGCAAAGATCA  
ATATGAGCATTGATGACAATGTTTCAGCTGGCCCAAATTTCTCTGGATCACCATCTGATGCTTCTCTCCAGAC  
AATACTACTTATGCACACTTTGCAGGGGGCCCTTACAGAAGAGGGCCTCTGGATATTGGTAAAGCCATTGGGAAG  
CTCTACTATCTACATTAGATGCTGATTTGTTCCCTCCAGCCCTTCTGCTTCTCCATCTACTTCAGTATCATCTGTC  
CTTCATGATTCTAACATTTGGGGACCCTACAACACCAAAACCTATAATGGGTTCAAATATTTTTTAACTCTAGTGAA  
TGACTACTCTAGAGCCACTTGGACTCATCTACTCTCTTGCAAAGGCAATGCTCTTTCAGTTCTTAAAGCTTTTCGCT  
TCCATGGTAAAAGTTCATTTTCATTCCTCAATTCAAACATTTAGATCTGATAATGCTTATGAGTTGGGATGTAGTTC  
TGAAGCTATTGTTTTCTTCACTAGCCAAAGGATACTTCATCAAACCACCATTCCCTTACACTCCTAAACAAAATGGA  
GTTGTAGAAAAGAAAACACAAACATCTTTTAGAGGTTTCTAGGGCTCTACTTTTTCAATCTAATCTTCCCGTCACAT  
ATTGGGGTGAGTGTGTCTCCTACTGCCACCTATTTGATCAACCGGATTCCTTCTGTTATACTCAATAACCTTTCTCCT  
TATGAAAAACTACATGGCAGCCCTCCTACCTATTCTCACTTAAGATCTTTTGGTTGTTTATGTTTTGCCACTTCTCC  
CAAATCAGGGAAAGATAAATTCAAATTTAGAGCCATTCATCAGTATTCTTAGGTTATCCCAATGGAAAAAAGGGA  
TACAAATTAAGTGAATTTGATAACCAACTCTGTTTTCTTTTCTAGAGATGTTATGTTTCATGAAAATATTTTTCTTAT  
AAATCTGATTCTCCTTCCCTATTTCTTTCGGTTCCTACTCCTGACTTTGTGGATATTTCACTTCTCCTGTGCCTTCT  
TTTGTTAGTCCCTCAAATCTTGGATCCTCTTGTGGTCCCTTACCTCCTGGTCCATCTTCTTCTTATTCCCAG  
ACTCCTATCCCTTCTAGACAATCTACTAGACACAATAAGCCTCCTTCCCTACCTTACTGATTATATTTGCTCATCCGTC  
CTACCCACCCAGCTCCCAATTTACATACTATTCTTGCAAATGGGTGTACAAAATTAACGGAAAGCTGATGGTT  
CCATCGAGAGATATAAAGCCGTTTTGGTTATTAGAGGTGACACACAAATAGAAGGTATTGATTTTCATGAGACTTT  
CTCTCCGTTGTCAAACACTCACTACCATTAAGTGCCTTCTTACTCTTGTGTTAAAAGGAACTGGACTGTTTTTCAA  
CTCGATGTTAACAACGCCTTCTTTCATGATGATCTCCATGAAGAAGTATATATAAAGGTTCTCCTGGCCTTACCAT  
TTCTCCTGCTTCTTCTCCTCCTCTAGTTTGCAAACACTCAAGAAGTCTCTTATGGCCTTCGGCAGGCTTCTCGG  
CAATGGTTCTCTAAATGTCTGAAGCTTTGCTGTCCCGAGGTTATATTTCTAGTAAAATGACTACAGCCCTTTCAC



|     |     |                                                                                                                                                                                                                                                                                                                                                                                                                          |                                                                                                                                                                                                                                                                                                                                                                                                                                                                                                                                                                                                                                                                                                                                                                                                                                                                                                                                                                                                                                                                                                                                                                                                                                                                                                                                                                                                                                                                                                                                                                                                                                                                                                                                                                                                                                                                                                                                                                                                                                                                                                                                                                                                                                                                                                                                                                                                                                                                                                                                                                                                                                                                                                                                                                                                                                                                                                                                                                                                                                                           |
|-----|-----|--------------------------------------------------------------------------------------------------------------------------------------------------------------------------------------------------------------------------------------------------------------------------------------------------------------------------------------------------------------------------------------------------------------------------|-----------------------------------------------------------------------------------------------------------------------------------------------------------------------------------------------------------------------------------------------------------------------------------------------------------------------------------------------------------------------------------------------------------------------------------------------------------------------------------------------------------------------------------------------------------------------------------------------------------------------------------------------------------------------------------------------------------------------------------------------------------------------------------------------------------------------------------------------------------------------------------------------------------------------------------------------------------------------------------------------------------------------------------------------------------------------------------------------------------------------------------------------------------------------------------------------------------------------------------------------------------------------------------------------------------------------------------------------------------------------------------------------------------------------------------------------------------------------------------------------------------------------------------------------------------------------------------------------------------------------------------------------------------------------------------------------------------------------------------------------------------------------------------------------------------------------------------------------------------------------------------------------------------------------------------------------------------------------------------------------------------------------------------------------------------------------------------------------------------------------------------------------------------------------------------------------------------------------------------------------------------------------------------------------------------------------------------------------------------------------------------------------------------------------------------------------------------------------------------------------------------------------------------------------------------------------------------------------------------------------------------------------------------------------------------------------------------------------------------------------------------------------------------------------------------------------------------------------------------------------------------------------------------------------------------------------------------------------------------------------------------------------------------------------------------|
| 117 | NO  | GO:0003676;<br>nucleic acid<br>binding;<br>Molecular<br>Function;GO:000<br>3677; DNA<br>binding;<br>Molecular<br>Function;GO:000<br>3723; RNA<br>binding;<br>Molecular<br>Function;GO:000<br>3964; RNA-<br>directed DNA<br>polymerase<br>activity;<br>Molecular<br>Function;GO:000<br>6278; RNA-<br>dependent DNA<br>replication;<br>Biological<br>Process;GO:0015<br>074; DNA<br>integration;<br>Biological<br>Process; | ATGGTTAAATTATTTTTATCTGGGCTCCGTCAGGATATTAAGACAAATGTATTGGTCCATAAGCCCACATCTCTTGAT<br>GAGGCCATCTCGTTGACCCAAACCCATAAGCAACGCCTTCAGTTAGAGAGAGGGGCACATGACTCCAACCCTTGC<br>TAAGACCCAGCCCTTGCTTCCAACACCACAATCCAGATCAATTGTTCCCTGCACGAAATAACCTCAATGCTTTGTCA<br>CGCATTCCAGTCAAGCGGCTCTCGCCGACGGAGATGCAACAACGTCGAGAAAAAGGGTTGTGTTATTATTGCGAT<br>GAGAAATATACAACAAATCAGAGGTGCAAACTCTTCCCCAAATACTCTTTCTTGAAGATGATCCAGACGCCCTT<br>TTGTCTGCAACAGAGCAACTCACCTTTGATGAAATGCTAGCAGAGGAGTTACATGCCTTAGAAATGCAGGCTTAC<br>TTTACAATATCTTATCATGCTTTGTCTGGTGGTCACTCCCCAACTATTCTGCGTTTCAAGGGGCATGTTCCGCGGGTC<br>ACCTATTGTCATATTGGTGGACGGCGGCAGTACCCATATTTTTATTCAACCTCGGATGGATGACTAATTTCAATTC<br>AAGGGGCAGACCTCTTGATGGATTTGTACGTTTTGGCCTTTCATGGAGCGGATGTTATTTTCAGGGTTTCATGGTT<br>GGCCACCTTAGGTCCGGTGCTTACTGACTATTCCACCTGTCACATGGAATTTTATTTGGATGGCAAGCAAGTTAAG<br>TGGGTGGGTAATCCTCCTGATGAATTGCAACCAGCTCAGTTACAAATGTTACGTCGTTACCACACCACTGATGTCG<br>TGGTGGCATGTTTTTATCTATTATGTTGCACGATGATGCCACAATTACCGATGTTATACCCCTAAACTTAGAAGTC<br>TTGTTGGAATCGTATTCTAGGGTTTTCAACAAACCTCAAGGGGTTCCACCTGCTCGAGACACTAATCATGCCATAC<br>ATCTCCAACCACATGTCGACCCTGTTAAAAAGAAAGATGGTTCTTGGCGTTTTTGTGTTGATTACAGGGCCTTGA<br>ACGCCATCACTGTACGAGACAGATTTACAATACCTTCTATTGATGAACTCTTTGATGAGTTGCATGGTGCTCAATTT<br>TTTTCTAAGCTGGACTTATTAGCAGGTTATCATCAGATTTCGAGTTTCGTTCCAACCGACATTCCCAAACTGCCTTTC<br>GAACTCATGATGGCCACTACGAGTTCTTAGTCATGCCATTTGGATTGTCGAATGCTCCATCCACTTTCCAAGCTAC<br>CATGAATGACATTTTTAGGCAATACCTTCGTAAGTTTGTCTTGTGTTCTTTGACGATATTCTGATTTATAGTTCTAC<br>ATGGACCTTACATTTGGAGCGTTTGGAGTTGGTGCTAAAATTGCTCAAACATCACCAGTTGGTTGCTAAGCGTAA<br>CAAATGCCATTTTGGGCAGAGTAAGGTTGATTATCTTGGCCACGTCATTACATCAACCAGACTTGCAGTAGATCCA<br>TTAAAGATTGATGCCATCCAACAATGGGCCACTCCAAAGTCAATTAAGGAGGTTTCGTAGTTTTTTAGGCCTCGCGG<br>GCTACTATCGGTGTTTCATCAGACAATTTGCTACTATTGCTAGTCCCATTCTGACTTGTTGAAAAATGATAGTTTT<br>CAATGGACAAACCAGGCACAACAGGCTTTTGGAGGCTAAAATGTCGTCCTTAGTTCCACACCTATCTTGGCATTG<br>CCTAATTTCTATGAGGATTTTACCTGGAGACAGATGTCTCAGGTGTGGGAATTGGAGCAATCCTCTCACAAAGA<br>AAACATCCAGTTGCTTTTTATAGCCAAAAGTTATGCCCTAGGATGCAAAAAGCCTCAACATATCACAAAGAGATG<br>TATGTCATCACACAAGTAATGGCAAAGTGGAGGCAATATTTGTTAGGGCGCAGATTCATCTTTACTGACCAGC<br>AATCCCTCAAGAACCTCACAAACCAAGTGATTCAAACCTCTAGAACAACAAAAATGGCCGGGGAAGCAGAATAA<br>GGCTGCAGATGCTTTGTCCAGACCCCAAGATGGAGGCGGTCGTTTGGTACTACCACGGGACTCGCCCTTGAAGC<br>AGTTTCTACTTCAAAGTTCCACGATTCGAAAATAGGGGGGCATGCTGGGGTTGCTCGCACTTTTCATAGATTGTC<br>TTCTAATTTCTCTTTGCCAGCAATGCGCAACGATGTTGGTTTATATTGCTTCATGCCAGACTTACAGCGCTTCAAGG<br>ATCGTAATCGATTACCCGAGGCCTTACAACCAATGCTGATCCCATATATGGTTTTTGGAGGAAATTGCTATGGAT<br>TTCATTACTTGCTTACCTAGTTCAAAGGGGAAGACGACAATCATGACAGTGGTGGATAGGTTGTCCAAATACAGT<br>CATTTTATTCCTCTTCCATCTACTTTCTCCGCCATATTGTGGCACAAGCTTTTGTCAATCATATCATCAAATTACATG<br>GTCCTTCTCGAACAATTATAACAGATCGTGACCCTCGTTTCTTGCCATACTTTTTGGCAAGAGATCAATCGCTTGCA<br>ATGGATGCCATACAAGATTGGAAAAGTCAGAAATTATCACATCACGAGTACACAAGAGGGGAATAAGAAAAGGGTC<br>GTCTGAGATGGTTAACCATGTCCAACATAAGCATCCAAATGGACTGGTCTTCAGTGTGACAATATGATGATTGAA<br>ACTGTTGAAAAGAGACTGCGTAGACTTAGAATCACATGGAGAGAAATTTCTTAAAGGACCTATAA |
| 118 | yes |                                                                                                                                                                                                                                                                                                                                                                                                                          |                                                                                                                                                                                                                                                                                                                                                                                                                                                                                                                                                                                                                                                                                                                                                                                                                                                                                                                                                                                                                                                                                                                                                                                                                                                                                                                                                                                                                                                                                                                                                                                                                                                                                                                                                                                                                                                                                                                                                                                                                                                                                                                                                                                                                                                                                                                                                                                                                                                                                                                                                                                                                                                                                                                                                                                                                                                                                                                                                                                                                                                           |

|     |     |                                                                                                                                                                                                                                                                                                                                                                                                                                                                                                                                                                                                                                                                                                                                                                                                                                                                                                                                                                                                                                                                                                                                                                                      |
|-----|-----|--------------------------------------------------------------------------------------------------------------------------------------------------------------------------------------------------------------------------------------------------------------------------------------------------------------------------------------------------------------------------------------------------------------------------------------------------------------------------------------------------------------------------------------------------------------------------------------------------------------------------------------------------------------------------------------------------------------------------------------------------------------------------------------------------------------------------------------------------------------------------------------------------------------------------------------------------------------------------------------------------------------------------------------------------------------------------------------------------------------------------------------------------------------------------------------|
| 119 | yes | ATGCATGTTGAAACAAAGAAAGAACTGAAGTTTGAGAAAGTGAATGAAAAATTTGCTTTTGAGCCATCAGAAAG<br>AACTATTGACAACATGGAAGAATGTCCACTTCAGAAATATCTCTTGGGTTCTTCAGTTGAGTCGCAAGAGATCATA<br>GAGTCTGAGGAAATGCTAAAGCAACAAAAAGGATTACTAGAAGAGTTGACGTTTAAAGAAGAAAAACAAAGATA<br>AGAAGAAGAAAAAAGATGCAGGTCATTTTCATGAAAAAGATATTGCAGAACCCTCCAGCCCAAATCAAAGAGCTCA<br>AATGTCACTGCATCTGTTTCAAGCAAGAAGAACTCCCTCAGGTCACTACTTAA                                                                                                                                                                                                                                                                                                                                                                                                                                                                                                                                                                                                                                                                                                                                                                                                    |
| 120 | yes | ATGAGGACCCTTAAATGGGATCCATGGTTAGAACCTGATGTAGAAACAACGATAGGAGTGGCATGGATATCTTTCC<br>CGGATCTACCACCGAATTTCTTTGCGAAGGAGGCAATTTTTTCAATAGCTGCAGCAGTGGGTAAGCCACTAACCG<br>TAGACATGGCAACAAGAAATCAGATAAGACCAAGTTGCGCCAAGGTTAAAATAGAGGTGGATTTGACGGCCAAG<br>TTACCACAAACGGTTAGAAATACAGAGGAAGACGATATCACAGGGGCTATTAATAACAAATGGATTAAGGTGCAA<br>TATGACTATATGCCTAAATATTGCAAAGAATGCTGCTTACAAGGACATGATGAGCAAACCTATTGGTCATTGCATCC<br>TGAATTATATGAAACAAAGATTGAAGAAGAGAGGAAGAAGGAGGAGATAAAAAGATATAAAAACTATTGGAGGAA<br>CGAAAGGGGAACAAAGTAGGATGCTGGCAAGTGGGAGAGTGGTAGGGCCAAAACAAAATAGACAAGAATGGAT<br>GGTTAAGGGAAGAAATAAATAACAAGCGTGATAAAAATGGGCGAATTGAAGGGGAAAACGATTTGCAAGATGAAA<br>ATCCATTTGAGGCATTGGGAAGAGTAGAGGAGAATGAGGAGGGAGTGGTGGAAAACAAAGAAGAAAGATTGAG<br>CACAAAAGATTGGACCAATGGCGAAGATAACAGAGGGGAGGTGGCGAAGAATCAAGAGGGAACACCACAAGT<br>GCATAAAGTGGGATCAACGGAAGAGCAAGAGAACAAGGAGGATGACTTGAAATATGGCCTAGTATTGTTTCGAGC<br>CAAACAAGGAGGAATTTTTGCCACTAGCAATTCATAATGACAACCATGAAGGAGCAAGTGATATAGAAAAGGCA<br>AATATGGACAAGGCAGACCTAATCAAAAATATTGAAAAGGCAGCAATTGAAGGAGACTTGTCTCCGAAACAGAT<br>TAACAAATTAAGGTGCTCACATGAAATCAAGGAAACAAGGGGAAGGAGAAATTATAGTTGCCCAAGCATCGT<br>CAAGGTCTAAGAGAACGATCATAAAAAATTCTAAGTATCAATGA |
| 121 | yes | ATGAGAATGGTTTCTGCAAGCAAAAAACAAAGAGAAGAGGAGGAGATGGATTTCTCTGATGCAATGGTGGTCAT<br>GTACGCAGATGCAGAACCAATTCCAATTCAGATTGATAGCAGCTCTCAAGAGGGAGATATAGAAGCTAATGCCAC<br>CAAATGGATCCAAGAAAACATGATCAGTTTGAGCCTGCACTTCGGGATGGATCTCAAAGGATGCAAAAAGGAAG<br>CATATGCTCTGTTGATGAATCTGGATCAGAGAACAAGAAAGGACAAGAAGACAGTGGAGGGTCAAAGGATCAAT<br>AATTAA                                                                                                                                                                                                                                                                                                                                                                                                                                                                                                                                                                                                                                                                                                                                                                                                                                                      |
| 122 | NO  | ATGGGATATCCAAATGATGGAATGGACACAAACAAAGGCAGTACTGCAGTGAACAATGTGACTGGTGGTGAAG<br>CTCTTATCCAAAGATAGGATGTGTGGAAGAAAAGTCGACTAATGAGCTTGGAGGAAAAGGAGTTTCACTTAAACG<br>AGGAATAA                                                                                                                                                                                                                                                                                                                                                                                                                                                                                                                                                                                                                                                                                                                                                                                                                                                                                                                                                                                                                 |

|     |     |                                                                                                                                                                                                                                                                                                                                                                                                                                                                                                                                                                                                                                                                                                                                                                                                                                                                                                                                                                                                                                                   |
|-----|-----|---------------------------------------------------------------------------------------------------------------------------------------------------------------------------------------------------------------------------------------------------------------------------------------------------------------------------------------------------------------------------------------------------------------------------------------------------------------------------------------------------------------------------------------------------------------------------------------------------------------------------------------------------------------------------------------------------------------------------------------------------------------------------------------------------------------------------------------------------------------------------------------------------------------------------------------------------------------------------------------------------------------------------------------------------|
| 123 | yes | ATGACCACTGTGAGATGTCTCTTGTCTGTTGTTGTTAAGAGGGGCTGGAAGGTTTACCAATTGGATGTAAATAACG<br>CTTTTTTGTACGGAGATCTACACGAGGAGGTATATATGCAATACCCTCCTGGTCTTGAGTTGCCTATTTTCATCTGTT<br>GTGTGTCGCCTGCATAAGTCTTTGTACGGGTTGAAGCAAGCTTCTCGTCAATGGTACTCGAGACTTTCTTCAGCTC<br>TTGCCACACATGGTTTTGTTTCTCTCAACGATTATTCACTCTTCTTTAAAGTCTCTGGTCAGCTCATCACCATC<br>ATTGCCGTGTATGTTGATGATATCCTGCTTAGTGGTAATGATACATTAGAAATCAATAGGGAAAAAGAGGGACTTG<br>TCGTTACCCAACGTAAATTTGCTCTTGAGCTTATGCAAGAGTTCAATTGCTCTGGATTGTCGTGTTGTGTCTACTCCT<br>TTGGATCCCAATTTGAAACTTTCTGCTACTTCTGGTTCTCCTTTGCCAGATACTTTGGTATATCGACGACTTCTTG<br>AAAGTTGAATTTTTGACCAACACTCGGCCAGATCTTTCCTATGCCGTGCAGACTTTAAGTCAATATATGCACTCT<br>TCACACACCGGGCATCTTGAAGCTACATTACATACCTTCGTTACTTGGCTAGAGATCCGGGATTAGGTCTTCTCA<br>TGAGTTCTTCTGCCTTTTTCCATATTCTTGCCTTTTGCATGCAGATTGGGCGTCTTGTGTTGACACTCGTCGATCC<br>GTAAGTGGTTTTCTCCTTAGCCTGGGGGTTGTCCTGTTTCATGGAAATATAAAAAACAACCTGTTTTGGCATTGT<br>CTTCAGCTGAGGCAGAATACCGCTCTATACGTCGCTTGTGCGCTGAAATCACTTGGATTGTTTCGCTTCTTCATGA<br>CCTTAGTGCTCCACTTTCATTGCCTATTCTCTTTCATTGTGACAACCTAG |
| 124 | NO  | ATGGTCAAGAAGGAAGGTGGTGTATGACAGAGATAAAGGGTATGCTGCAGCATATACTGGGAAAATGGAAATTT<br>GGAACAGAAATACAAGGAGCACTACCAGCAGACTGATGTGAATCCAAAAGATATAGGTCCAAAGCAGATGAT<br>GGTTATGAGTATTCATCACGGAAGGGATCTAGACGCAGAACAAGAAAAGGCTCAGACAATGAAAGAAGAGGTG<br>CAACCTGCTCAACTACCATTGAATTAGATGAGTCTGAGAATCTGACCGATGTGATAGAAGAAACGCCTGAGATA<br>GAAAATCGTCAAGTCAGGGACAAGAAAAGGCCTCTGACACCCTTTCAACAGATCAGATTGGCTATGTATAAGAA<br>GAATGATCAGTATAAGAAGTTCATGGAAATGTTGAAACAAATCCAGTTGAACATTCATTGA                                                                                                                                                                                                                                                                                                                                                                                                                                                                                                                                                                                  |
| 125 | yes | ATGGACTTGAGTCTGTGCGGAGACGGTTATATCAAGAATGAGAAAGGAGCACTGATTAGACAATATGATTGGAAA<br>CCAATCTTATGCAAAACATTGTCGTAAATATGGTCACTCTGAGGAACTTGTAGAAAAGAAACAAAATGGTACAAA<br>GTCCCTATTGTACAGGATCAAACAGTGTCCAATTTACGCATGTGAAAAAATATCAGCAATTAAGAAAACCAAG<br>GTTGGTGACAAGGCAACTTCTCCAGTTAAGGCACAATCTGGACAAAACATGGAATCTGGATGGGTGTCTCCACA<br>GAGGAAGAGTAAAAGTCAGCAGGTGAACGCTCAGCAGGTCGAGAGCTCAAACCTCATTTTAG                                                                                                                                                                                                                                                                                                                                                                                                                                                                                                                                                                                                                                                           |
| 126 | NO  | ATGGTTGAAAAGGTTATTAGTAGAATTACTGGATGGCAATCCAACTTCTCTCAATTGGTGGGAAAGTTGTTCTAA<br>TCAAGCATGTCCTCCTTGCACTCCATATTCATCTCCTAGCAGCGATTCATCCTCCAAAAGGTGTTTTAAACACTT<br>AGAAAGGGTGGTAGCTAGATTTTTCTGGAGTGGTAATGATGAAAAGAAAAGTTTCATTGGGCCTCTTGGGATGA<br>TTTATTCAGACCTTATGACGAAGGTGGTGCCAGTTTAGAAAACCTCAAGACATATGTGATGCTTTCACAACAAA<br>GCAATGGTGGAATCTTAGAACGAGTCAGTCATTATGGAAGAAATTCCTTATGGCTAAATACTGCCAAAGAGTGCA<br>CCCTTTGGTCAAGAAGTGGTACTCAGGTAATGTTACTTTCTGGTATGACAATTGGAGTTCTTTTGGATCTCTTATTG<br>ACTTCCTGCCTGATGGAGCAAAACCTGGTTATCACAAGTCAAAGACATGTTTGTGGATGGACAATGTGATTTGA<br>TGGGCTGGGATAGACTTCTCCCTGAAGAAATTTCTACAATATTTGCAATATGAAGATGGAATTAACCCGAATGA<br>ATTGGACAAGCCTATATGGACTGATGATAGTAAAGGTGTCTTCAAAGTATCTTCTGCTTGGAAAGTTACTAAGAAGT<br>ACTACCAAAGTTCTTGGATTGATACTATGACCTGGAATAAAGTCATTCCCTTTAAATGTCTTTTATTGTTTGGAG<br>AGCTTTAAGGGATAAAAATTCCTACTGATCTAAGGATTATGATATCACCATTGGGGCCAATTGTATAGCATAA                                                                                                                                                   |

127 NO ATGATTAAGATTATTGAGCGAGCGATTAAGGCAGCAATGTGCCTATTTAGGGCTGAGGTTGTGTTGCATAAGGCCA  
CTCTAGCCTCATATGAGGAAAGGTTGGATAACCTCATTGCTAAAGTGGCGCCTAGAGAGCAGGGTGAGGATAGCT  
CTACTGGTTAACTGAGTTGAGTGTAGAGGTTGCTACACTTAGAGCTAATGTGGACCAGATGAGGTCCAGTAATAT  
CTCCATGCTTTGA

128 NO ATGGTAATCGGAGGAAATACGTCCACAGGTA ACTCTAACACTGGGAAGGCAGGGGAAATACATAGTGCAGGTAT  
GAACGTAGGCCAACTGTGGCCGGAGTTGAAAGGGAATAAAACCCCTCTTCTGACCAGTACGCCACAAGGCCCAT  
CTGGGTCAAATCAATGGAACAGGAAATGCAAGGAGACTATGATAAACTGGTGTAGCATCCATCTGCAAAGCAT  
CGACGGATTTATGTCCAGAATCGGTAGGAAAGGGGGAAGAACTTGAGCAGAAAAAATGGGTAAATCTGTTTCAA  
GGGAATTGA

129 NO ATGCCCCAAATCAGGCATGAGTTTAGGGAACAAAATAGGACGGCCGACTTGTTAGCAAGGAATGGGAGAATGCT  
GAAAGAGTTTCTTTTTGAAGAATGGCTAGTTCCCCAGTGTGTTCTTGAAAGTCTAGAAGCAGACAAGGGAG  
GAAC TTCTTTTGCTAGTAATTCAACTATCGTCTGTAATACTAATGGGCACCTAAGCCCAATACTTAAC TTGTTTGT  
AACGCTTCAAGCAATGTGGCTGATCCTGATGTATTGATGCATGTTAACTAA

130 yes ATGGTTGGGGGTGCTTCCAAAGGAGGCTTTAGTAAAGACAGTTCTGCCACTCATATTCAGAAATTTGGATTTCCA  
GCCAGCAAGTCTGTTGTTTCATGCTATCTATGATGAATCAGAAATCACCATTTACAAGTCTCCTATGGAAGATGAGA  
AACCCAAGGTATTCCCTGAAAAAGGTACTAGTATGAATGTTAAGGATATTGGGCAGAAGAGACGAAGCTGTCCTG  
GTTGGCCCAATGATGGAGGAGAGCAAATGTTTGATCTTGTTGACAATAATTTTTGTCACCAGCTTGTAGCCAGTGT  
TACAGAGCCCAGTGGGCCTAAAATTCCAGATGTTGGAAGCATTAAAGATACTTGGGAATGAGGCAAAGTAG

131 yes ATGGTGGATGGAATTATGAAGAAAGTGCCCAAAGATGTGATTGTTGCTATAATTTTGAAATTTCCAATGAAATCTC  
TTGTGCGATTCAAATGCATCTCCCAAATTTGCAAGGCTATCATACAATCATCCACTTTTATCAACCAGCATCACAA  
CCGCTTAACA ACTGCTACAGATGAATTAATACTCTTCAAAGGTCCATCAAACAAGACACCAATCAATATAAAAC  
TATCTTGTCTTTTCTTTCAAGTGATGATTGTAATCAGTTCAACCCCATTTTTCCAGATCTAGATGCGACTTACCTAA  
ACTCTAATTATAGTAGTGATTATGATCAACTCATGGGTCCTTGCCATGGTTTGATTGCATTGATGAATTTCTCTAGCA  
CCATATTAGTTAATCCGTCTACACAAAATTATAGGCTTCTCCACCTAGCCCTTTTAATTGTCACGAGGATTCTATC  
GATCCATTGAAAGTGTTGGGTTTGGCTTCGACTCCATTGCAAAAGATTACAAGATTGTTACAATTTTACATGTTTAT  
TTTGAAGGTCTAGTGGATATCCTGAAGAGATAACGAAAAAGGTTGAGGTTTATGAATTGGAAAATGATTGTTGG  
AGAGAACTGGATCGTGTGAATCAACAGTTGCCAGCTTGTTTTGGTTGCCATGTTCTCAAATTTATTTAGGGGAT  
CTTGTCATTGGATTGCAATCCCAGAGGTAGACCCACTGGTAATTTCTTTCTTTGACATGAGCAAAGAGATTTTTCA  
AACTATGAAAATGCCCCAGACTTGTTATTTTCATTGGTGGGCCAACTTATAGTCTAGTCATCTTAAACGAGTTTTTAA  
CATTGATTTGTTACCGCTATCAACAGCCCACAATTGACCAAACAAAAGATTTGATTGACATTTGGATAATGAATGA  
TTATGGTGTATGTGAATCTTGGAGTAAGGAATACACAGTTGCAGGTCTTCCTATTGAATCCCATTATCAATTTGGA  
ATGATTACTTATTGCTGTTTCAAAGTAAAAGTGGAAGTTTGATGTCATATAATCTCAACTCTAATGAAGTCAAGGA  
ATTAATTTACACGGTTTTCTGGCACTTTGAGAGTTATAGTTTACAAGGAAAGCTTGATTTCCATTCCAAGAGGA  
AGCGAGGTTAGTACACAGGTTGAAAAGTTCTAG



|     |     |                                                                                                                                                                                         |                                                                                                                                                                                                                                                                                                                                                                                                                                                                                                                                                                                                                                                                                                                                                                                                                                                                                                                                                                                                                                                                                                                                                                                                                                                                                                                                                                                                                                                                                                                                                                                                                                                                                                                                                                                                                                                                        |
|-----|-----|-----------------------------------------------------------------------------------------------------------------------------------------------------------------------------------------|------------------------------------------------------------------------------------------------------------------------------------------------------------------------------------------------------------------------------------------------------------------------------------------------------------------------------------------------------------------------------------------------------------------------------------------------------------------------------------------------------------------------------------------------------------------------------------------------------------------------------------------------------------------------------------------------------------------------------------------------------------------------------------------------------------------------------------------------------------------------------------------------------------------------------------------------------------------------------------------------------------------------------------------------------------------------------------------------------------------------------------------------------------------------------------------------------------------------------------------------------------------------------------------------------------------------------------------------------------------------------------------------------------------------------------------------------------------------------------------------------------------------------------------------------------------------------------------------------------------------------------------------------------------------------------------------------------------------------------------------------------------------------------------------------------------------------------------------------------------------|
| 135 | NO  | GO:0003676;<br>nucleic acid<br>binding;<br>Molecular<br>Function;GO:000<br>3677; DNA<br>binding;<br>Molecular<br>Function;GO:001<br>5074; DNA<br>integration;<br>Biological<br>Process; | ATGTCGAAGAAAAGAGGTGAATCGTCCAATTTTGC GGAACAGGAGGAGGAAGAGATATCACTATTACTGGTAAC<br>AAAGGAGGAGATTACCAAAAATCAGTGGTACTTAGACACGGGATGCAACAATCATATGACTGGTGTCAAGGAAG<br>CTTTATCAACCTTGGATGAACTTTTAGAGTCAAAGTGAGGTTTGGAGACGACTCAAACTTCCAGCAATGGGG<br>AAAGGTCAGGTTACAGTACAAACGAAAGGAAATAGAATACATACAATTTCTAATGTACCTTATGTGCCACGCTTG<br>AAGACTAATTTGCTCGGGCAGTTACAAGAAGAAGGTTATGAGTTGAATATAAAGAATGAAAAGTGCAAAATTCA<br>AGAGGCTAAGCTTGGATTAGTGACACAGGACTTAAAATCCTTCAACAAAAGAACATGGTCACTGGCCTTTCAAA<br>GTTTTAGAAACCTTACAGCTTTTGTGAAGATTGTGTCATCGAAAAGCAACACAGAGAATCTTTTCCCAAAGGTAG<br>AACTCAAAGAGCAAATCAGAAAGAAAACGGTAGCCTACACTCCACAACAAAAGGGAGTGAGCGAGAGGAAGA<br>ACCGAGCAATCATGAATATGGTAAGGAGCATGTTGGTTAGAAGCAAAATACCAAAGAAGTTTTGGCCTGAAGCG<br>ACAAACTGGAGTATACATATTTTAAACAGGAGTTCAACTTTTGTGTCGAGATATAACACCAGAAGAAGCCGGG<br>AATGGGAGAAGACCTGATATTATTGTTAGCAGGGATGTGATTTTCTCTGAAGAAGAGTTTTGGCAGTGGGATGAA<br>GGAGGAGTTAAGAAACATACACCAACATTTTTTGGTGATGAAGAACACATCAACAGTCAGCATGATCCAGAGCA<br>GATGCAAGAGGTTGAATCTTCACATCAAAAATGTGAACTAGTTAGCTTTGATAAAGCAGTCCAGCAACCAAATG<br>GCAGAAAGCAATGGAAGAGGAAATATCTTCCATTGAGAAGAAAACACCTGGGAACTTACGACATTACTAGAAG<br>GTCAAAGAGCGTTGGTGTAATAATGA                                                                                                                                                                                                                                                                                                                                                                                                                                                                                                                                                                                                                                                                                                           |
| 136 | yes | GO:0005524;<br>ATP binding;<br>Molecular<br>Function;GO:000<br>6915; apoptosis;<br>Biological<br>Process;                                                                               | ATGCTTGAATCGTACACAACATTAAGCTCTGTTTCATGATGCTGCCGTTAACCTTAGAGAAATCAGCGAGATTG<br>ATCATGTTGATGGCGTTACCAATCAATTGCAAGTCATCATTGAGAAGACTAAGTTGGAATCAGATGTAAATACTT<br>ATTTCCAAAAGTCAACAAGGATGGTATTGTTGTTACCCCAAATTTGTAATCGATTTTCATTGATACTGTTGTATTGA<br>ATCTGGGTGATTTATTGAAGGTTTATTGTTCTAGCTCACTACTTTTTGTTCTGTTGACCTAACAAAGAGATGAGGGA<br>TGTTTTCAAGGAGTTCAAGTTATTGAGAAATTTGTATGCTTTGTTACGGACAGATTCATAGAAGTAAAGCCAA<br>CCTATCAATTTCTTCATTGATGTTTTAGAGGTGACCAGTCACGCTGCAATGGTTGCCTGGTTGTATCTCCCAAGCA<br>ATGACAACGAAAATCAGGAAACGAATGGTTTTCTTTCTAATCATCTGAACATGAAGATTAAGCCATTGACCCAA<br>GCATCCGCAAGATCTATATTGATTTGCTGCAAGATCTACGATCAGAATGGCGTCCGATTATTCCAATTAATCATGTA<br>GCTGATTATGTAGCTGGCTTTGTGGAGACTCTCCAACACAACCTTGAAGGCACTATCGGTTAGTAATCCCAATACTC<br>ATCAAATAGCAGACCTTCAGGAGATGCTCAACGTCTTAATTGCTAATCTGTCCATACAAGATATTGAATTTACCTT<br>AAAGATATCGACACTGTGATGATTGATTCCGGAATACTCGTTTACTCGTTGTGTGAAGATGTGGTGTAGGGAGAG<br>TGACTATTGATTTACCAGTTATGATTGAGCATATCAAGATATTGATCTACCACATCATCCGGAAGAGTTCCAATCT<br>AATTTGCCAAGGATTCATGGAATAGGCTATCTTGATTTTGTCTTAAGTAATTTGAAGGAGTTTCAAACCGTTATCC<br>AGATTCACCTTGCTTTTATGAAGACTCCACTTCAAAAAATTCAAGCAAACTGGAGAGCGTGCAACCTTTTCTGAG<br>GTTTGTTGCAGAACACAATAACATTATTCACGACAACTTCAAGAAATAGTGTGGCTCTACTGATTGGCAAAGCATAT<br>GAGGTAGAATATATCGTTGATGCTTGTGTGAGCAAAAGAGTTCCGGACTGGTGTCTCATGCTTTGGCTCTTGGAC<br>ATTAACGCTGAGGTTGCAGAGATGCAACAAAAGAACTGTTTAAAGTTGACTTAGTGTACCTTATAACCATTGAT<br>ACTGATACTTCCAGTAAGTCGTCAGAACTGAAAAAATGTCAGGGATCAAAGAAAAAATTATAGGTTTTAAAGAT<br>GAGATCGAAACATTAGTACACCGGCTAACACGACGATCCAAAGGGGTGGACATTATCTTCATTGTTGGTATGCCT<br>GGAGCAGGAAAGACAACCTTTGGCCAACAACCTTATTCTTGTGATTCAGTTGTCTCTCACTTTGATATTTCGTGCAT<br>ATTGTCATGTGTCTCCAGTATATTGAAAGAGGCGCTATTATTGTCTCTTCTGGCGACGCTACATGTTTCTATTGATG<br>AGACCTCTAAGACTCGTAAATTAGAACATTCCTTTACAAAATTTACAATCCGGGAGATATCTTATCCTCCTTGAT<br>GACGTATGGGATCGCAAGTTAGTGAACGCTATCACCTTCGCTTGTGTA |

|     |     |                                                                                                                                                                                                                                                                                                                                                                                                                                                                                                                                                                                                                                                                                                                                                                                                                                                                                                                                                                                                                                                                                                                                                                                       |
|-----|-----|---------------------------------------------------------------------------------------------------------------------------------------------------------------------------------------------------------------------------------------------------------------------------------------------------------------------------------------------------------------------------------------------------------------------------------------------------------------------------------------------------------------------------------------------------------------------------------------------------------------------------------------------------------------------------------------------------------------------------------------------------------------------------------------------------------------------------------------------------------------------------------------------------------------------------------------------------------------------------------------------------------------------------------------------------------------------------------------------------------------------------------------------------------------------------------------|
| 137 | yes | ATGAGTAACCTGGTGCTTGGGCCTACACGGGGATTACATATTATCATCTTTTGTTTTTTGGAAAAGTTTGAAGATTG<br>GACCTACTATAGAGAGATCAAGCTCAACAGGCCAAAGAGTGGGCTTGGATCTGAGAAGCTTGGAGAAAAGTTTG<br>CGGCTCAATGGGCTGAATTGAGAGAGAAGAAACACAGAGAAGCTCGGTGGGATGAGTTGAGAGAAAAGCACAT<br>GTTCTTGGGTTTTATGCGTGGATTGATTTTTTATATTTTTTTTTTTATTGTCTCTTTTCTTGGAGAAGATTGGAGTGGAC<br>CTGCTTGAAAGAGAGAAGTGATCAAGCTCAACAGGCTGAAGATTGGGCTTGA                                                                                                                                                                                                                                                                                                                                                                                                                                                                                                                                                                                                                                                                                                                                                                                                  |
| 138 | yes | ATGGACAACTATCTTCTAAAGGAACAATGTTTAGTAAAGAAGAAGGTAGGAGTATCCGCGGCGATGAGATATTT<br>CCTGATGAACATCTCATCACAATTCATGCAATCAGTGAAAATGAGAGAGAATGGCTAAATTCATTGGAGAAGAGC<br>AGAGATTACCTTGACTCATTGCAGAATCCAAAAATTCAAAGGTCCCAAAAATGCATCGCGATATTGAATCAAAC<br>TTAAGGTGTTATGAGCCTCTTGTGGTTTCTATCGGTCCATTTACCATGGAAAACCAGAACTTCAATCTATGGAGA<br>AGTACAAGAAGCTACTTGCAATTCAGTAACTGATGATAAAGTATTTAAAGACCCCTCCTTATCATGGCTTTTCGAC<br>AAATTCAGTGTCTCTTGATGAGCTTTACAGTAAGGTCAAGGACATTATGCCTGTTGTCAAGGAGTGTATGCTGAG<br>GAATCGATCAAAGATTACAACGATGAGGAGTTTGCACAGATGATGTTCTGGATGGATGTTTCATCTTTCAATACC<br>TTCACTGCATTGTGACCAGTAATTATAAAGAGCTGAAAATGAAGAGCCATGATATAGCTTTTCATTTCGTCGTGATCT<br>GTTCTTACTTGAAAATCAGTTACCATTTGAAGTCCTGGATGTGTTAATGAGATGTAAGCTCAAGGACAATGTAGGA<br>ATGAAGATGATAACAACGTTTCATCTCGAGTGCACATACAAATCCTTCTCAACGTAAAGGATTCATTCAAAGTATCA<br>AGGATTTCTTTGTTGAATTCCTTAGTGATCTACATCCTGAAAGCTGTACTGAAAAAGCTATGAACCTTTCTTAGCAA<br>GATTTGTGGAGGAGAATGTCCTGCCCTTAGCAAAGAAGAAAGCACGAAAAAACATGGCTTCCGGCTCATCTCC<br>TTGAGCTATTA AAAACA AATCTCATAAACACAACGGATTTCAAAAAGGTGGATGCTATCTAAGGGGTGAGTGGT<br>GCTCGTATCGTTCAGCTATGGAGCTACGTAGAGCAGGAATCCGTTTCAGGCCTGGAAAGAGTCGTCGTCTTTCAG<br>ACATGATTCAACCAAGTCACACTTTTTAA |
| 139 | NO  | ATGTCAAGAAATCCTGTTGATTGTAGCTCCTCCA ACTATGACATTGATAACTCTCTTTGGGGAATTCGGCCATGGAT<br>AGTCGCTGCTAGAACAGTTCTTTGGAAAACCTACTTCCCCTTGTGTCTCAAGAACTCTCGAAGATAACCCTAG<br>TTTAGTAGGTGAGATAACCACTAGTTGCACTCCTCGACAGGTTTTTGGTCTTGA                                                                                                                                                                                                                                                                                                                                                                                                                                                                                                                                                                                                                                                                                                                                                                                                                                                                                                                                                                 |
| 140 | NO  | CCCATTGGATTAGGCTGGTAGGGCTGGACATCAAATGTTGGGGAAAGAATGCACCTACGAAGATAGCAGAATTA<br>GTGGGAAACCCTCTTAAGGCAGACACAACAACA AATATGGTGAGGCTAACATATGCTAGAGTGTAGTGGGA<br>GATGCCGCTGAATAAGGAATACCCAAATGGGACAATGTTTAAAGAATGAGATTGGGAAAATAATAGGGCAAAGGT<br>GGAGTATGAATGGAAACCAGTTTGGTCCACTAAATGTAAGA ACTATGGGCATAAGCTAAAGGATTGTTGGAGACA<br>ACACAAAGATGCAGATGCATCTAGCAAGAAAGGTAATAAAGAGGGTAAGCAACAAAGGGGCAAGAAAATTCAA<br>GAGGAAGCACAAAGTAGACAAATCTAAAAATGGACAGGGTAAGGGAGGAAACATTTAA                                                                                                                                                                                                                                                                                                                                                                                                                                                                                                                                                                                                                                                                                                                      |
| 141 | yes | ATGAGTAGTACTAGGGGCATAATGAAGAAGCAGATACTGGAAGACTTCTTGAAAGA ACTTGATGTGTTTGAAGA<br>GAAGAAAATTGAGACAAAGGGGACAAAGTTCATAAAGCAAAGATTGGAAAAGGACATTGGGATGTAAGTTTTT<br>ATGAGGAAAGGCACAATGCTAGTAATAGCAGTGGTGAAGGAATGGATTTGTTATGGGAAAAGTACGAAATCGAC<br>TCTATAAAGAAAAGAAAATAGAGATAATAAAAAGAATAAGAAGATGAAGAAAAAAGAAGAGGTGAAGAGCTATGT<br>AAAAGTAGAACAGATAAATGAGCACATTGATCAGTTGTGTTGCTTGCAGGCACTAAAGTTGTCAGCTAGGAAAAT<br>GAATTTGGGGATTGGAAGGTCTAATTTTGTGAGGATTTCAAGGCAATTAAGGGCTTAAATGGATACACCATGT<br>GAGCAAGAATAACAAGAAGGTTCAATTGTGGAGATTGA                                                                                                                                                                                                                                                                                                                                                                                                                                                                                                                                                                                                                                                           |

142 NO

ATGGTGTGTCTTGGTTGCTGAACTCTCTATCCAAGGAGATATCTGGAAGTGTGCATATATTCGAAGACTGCACGGG  
ACCTCTGGGCAGATCTGGAGGCACGTTTTGGCCAAACAAATGGGGCTGAACTCTATCACCTACAAAAGGAGCTA  
AGCGACTTAGTTCAAGGATCAAGTGACATAGCAGGATATTTACCAAATTCAAAAGACTGTGTGATGAATTGGAG  
ACTCTAAATGCTGATGTAACTGTGGATGCACTTGGCTCTTGTGGAGCTGTTAGAGGAAACATTCTGATGCTAGCAC  
CTCTTCCTAGTGTTAGTCATGCTTATTCTCTATTAATTCAAGATGAGAAACAAAGGAGGTATATGTTAACAATCAAT  
ATCCAGGAGACTCCTCTTTTTTTTTAGCTGCTAAATCTCAGAGCAAGTATTCAGGAAACTCTTATTCTTATCCAAC  
AGCTAGTTATCCGAATAACACATCAAATTTGAAAATCTGACTGCAAAGAAAAAGCAAATCTGTTAATCACCT  
AAGGAGAAACAGTTTTGCTTGGCTCTCATTGTAAGAAGATTGGACACTCTATTGATCAGTGTTACAGGATTGTGGG  
GTTTCCCCCTGACTTCAAATTCACAAAACCAAAGAGGCAACAAGGTGGTGCACAAAGTCATGCAGCATTGGCAG  
ACGGAATTTCTGGACAGTCTATGGATGATGGACATGGTGTGGGACTCAACATCTCTCACAGGAGCAGTTCACAC  
AGCTTATCCAACCTCCTGAATCATGTTAAGGAGAACAATCAACAAACACACCAATATCAGAGGCCACTGCTAATT  
CTGTTGCTTATGCTGGTATAACTGACCCTTTTCATCATTGCATTTCTGCATTCATAATAGGACTGCTTGTGACTC  
ACATTAATCCAACCTCCTGGATCTTAGATTACAGGAGCCTCGGAGCATATGGCTTTTGACATCACAATTTTTCTAAT  
CTTACACCTTTGTGTATGCCTTTAACTGTGAATTTGCCAACTCACAACAGGTAAAGGATATTGTGGAACCTCCAA  
TTGATCACAAGCATTACCTTGTAATGGGTCTACAAGGTAAAGCATAATTCTGATGGTGGAAATGAAAGACTCA  
AAGACCGATTGGTTATAAGAGGGGATACACAACGTGCAGAGATTGATTTTCATAAAACATTTCTCCGGTGGTAA  
AGATGACTACCATTTCGTTGCTTATTTACTGTGGCTGTCAAGAATGATTGGAGAGTTTATCAACTAGACGTAATAAT  
GCTTTTTTACATGGAACCTTACAAGAGGAAGTATATATGAAGTTTCCACCTGGTATGGAACCTCCTCACCCCAAAC  
TGGTCTGTCGTCTAAAGAAATCACTTTATGGGCTGCGACAGGCATCCCACAGTGGTATGCCAGATTGACTGTTG  
CTCTTAATTTCAAAGGATATACATCTTCACTCAACGATTATTATCTCTTTTATAAAAAGGTAGGGACTTCTGTTTCTA  
TCGTCGCAGTCTACGTCGATGACATATTGTTAACTGGGAATGATCCCACGGACCTACATACCCTTAAACAATTTCT  
TGATCATGAATTCAAAATTAAGATCTCGGGGAGGTTCACTATTTCTGGGAATGGAAGTCCTTCAAGAGTCTCA  
AGGACTGATTTTGAGCCAACGGAAGTTTACTTCTGATTTGCTTGTGAATTTGATACTCCTGAGTCTCCATCTGTT  
TCTTCTCCTCTTGATCCGTCCCAAAAACCTTCGAGCAGATGAAGGGGAGCTTCTTGCTGATCCTAGTGTATATCGAC  
GTCTCATGGTAAAATTGAACTTTCTTACCATACTCGTCCAGATCTCTCTTTCCAGTGCAACATCTCAGCCAATAT  
ATGCAAAATCCTCGTTTGCTTTGTGA

143 NO

ATGTCATCCTCAGCACCAACTCCTGACTTGCAGATCTCAAAGGGATCACAACCAGCCTAAGTATCTTTCAGATT  
ACTTTTGTGCATAATGCATTTTCAGTCATGTCTCCTAATCCCCCTGTTTATCCTTTTTATTCTTCTTTCTCTGCTTT  
AACTACCTCCAATCACAATGGTTACTTCCGTTTGTCAAATTCAGAACCTGCTTCTTTTTTTTCAAGCCGCAATG  
CATCCTGGTTGGCAGTCTGCTATGGATACTGAGTTTAAAGCATTGATTCCAACAAAACCTGGGACATCGTACCTC  
TATCCCCTGGAAAAATTGCATTGCCCTGCAAATGGGTATACAAAGTTAAGCATAAGTCAGATGGTACACTTGAAA  
GATTAAAGGCACGTTTGGTTATAAGAGGTGATGTTCAACGTGAGGGCGTTGATTATACGGAAAACCTTTTTCTCCAGT  
TGTAATAATGACTACTATCCGTTGTTTATTGGCCATTGCTATCAAGAAGGGTTGGAAATGTATCAGTTGGATGTTA  
ATAATGCATTTCTTTCATGGGGACTTGGATGAAGAAGTATACATGCGTTTGCCTCCTGGTCTTTTTGCTTTATCTCTAT  
CTCATGTTTGTGCGCTTCGTAAATCTTTGTATGGCCTTAAACAAGCCTCTCATCAATAG



|     |     |                                                                                                                                                                                                                                                                  |                                                                                                                                                                                                                                                                                                                                                                                                                                                                                                                                                                                                                                                                                                                                                                                                                                                                                                                                       |
|-----|-----|------------------------------------------------------------------------------------------------------------------------------------------------------------------------------------------------------------------------------------------------------------------|---------------------------------------------------------------------------------------------------------------------------------------------------------------------------------------------------------------------------------------------------------------------------------------------------------------------------------------------------------------------------------------------------------------------------------------------------------------------------------------------------------------------------------------------------------------------------------------------------------------------------------------------------------------------------------------------------------------------------------------------------------------------------------------------------------------------------------------------------------------------------------------------------------------------------------------|
| 144 | yes |                                                                                                                                                                                                                                                                  | <p>ATGCCATGTTTCAGCATGCAAGCTGCTTCGTAGGCGTTGCACTAAAGATTGCATTTTCTTGCCTCATTTTCCACCTG<br/> CTGAACCACATAAATTTATTGTTGTTTCATCGTATTTTTGGTGCTAGCAACATCACCAAATGTTACAAGAGATACCA<br/> ATGGATAATAGAGAAGATGCAGTAATCAGCATGGTTTATGAAGCTACAGCAAGACTCAGAGATCCAGTTTATGGC<br/> AGTGTAGGCATTATTTCTGCCCTCCAGAAACACATATTTCACTTGCAATCCGAGTTAAACAAAGCTTCAGCTGAA<br/> GCAATGTCTCTCAGAACACAATTATCCAATGCTTCAACATCCTTACCCTCATCGTTACTGGAAGTTTCTCCATTAC<br/> TCCCGAGAACCACGAGTTTACCATTCCCAGAAGTCGAGCCAGCAAATGCATATTCTAATAATGACTTGCAGCT<br/> TCTACTTCCAGAAGCAGCAGACTATTGTTTCCAAGAACTGATCAAGTTCTTCCACTGCCTTACTAG</p>                                                                                                                                                                                                                                                                                                                                                    |
| 145 | NO  |                                                                                                                                                                                                                                                                  | <p>ATGTGGTGTGGGCACCCATCCTTCCAACCTCTTGTCCAACCTTGTGTTTGGACAACCAAGATACCCTCAATGGGGTCA<br/> TAAACCTCTTCCCAAAGAGGGCCACCCTTGAATGCCTCTACCTTTGGGAACATTTTCAGAAATATTAGAAAGA<br/> TTCTGGCAAGACTAGATGGGATCCAGAGATTCCCAGCTACCACAATAGCACCTTCCTTCAGGAATTAGAGTCTA<br/> GTCTCCTCAAAGACTATGACCAACTCTTAGCTACTGAAAAAGAATTCTGGAAAACCAAGTCTAGGATAAATTGTC<br/> TTAGTGATGGTGATGTAATAACCAGCTTCTTCCACACTTCCACAATCAATAGAAGGAGAAGAAATTACATTACCTC<br/> CATAAAGGATGATTCTGGAAACCTAATAGAGGACCAAAACCAACTCATGAATCATATTTTTCAGCTTTTTCAAACC<br/> CTCTACACCACTAACCACCACCCTCCAGCAGAAATAAACCAACTGCTGGGGACCAGGAGCACTTCATCTCTAA<br/> AGAAGTGTCACAACATGGACTCCCCCTTAGAGATAGTGAGATCATCAATGCCCTCAAGTCTTCCATCCCCTC<br/> AAAGCTCCAGGCCCTGATGATCTGCACCACATGTTCTACCAAAGTACTGGAACATTGTTGGTAGCAAGACCACA<br/> ACTTTCTGCAAATGGCCTTTGATCAGTCCCACATGCCTGACCAAATAACACCACCCTCTTGTGCATCATCCCAA<br/> TATGCCCTAACTCTCATACTCTCAAAGCTACAGGCCATTAACATGTGCAATACCAATTACAACTTGTACAAA<br/> AATCATTGTGA</p> |
| 146 | NO  | <p>GO:0003723;<br/> RNA binding;<br/> Molecular<br/> Function;GO:000<br/> 3964; RNA-<br/> directed DNA<br/> polymerase<br/> activity;<br/> Molecular<br/> Function;GO:000<br/> 6278; RNA-<br/> dependent DNA<br/> replication;<br/> Biological<br/> Process;</p> | <p>ATGGGAAGAATCCAAATGAAGCTGAGGTAAAGAAGTGGTATTTGGATTGAATGGTGATAGTACAAGTGGGCCT<br/> GATGATTTCTCAGGAATGTTCTTTCAAGCAAGTTGGGAGATAATAAGGAAAGACATCACACAATGGTACAATAT<br/> TTTTTTTGTGGGCAACAACCTCCCAAGATACATAACACACACTAATGTGGTACTACTACCCAAAAAAGAGAAGGTA<br/> TCTTCATTCACAGATCTAAGACCAGTGAGTCTATGCACTTTTGCCAATAAAATTATTTCAAAGTGGTACATGGGA<br/> GAATAGCAAGATTGCTTCCAAATATTATTTCAAAAACCAATCTAGATTTTTAAAAGGGAGAAGTATTACGAAAAA<br/> TTTACTATTGGCTCAGGAAATAATTAGGGAAATTAATTTGAGAAGAAAGTATCACAAATGTGGTGGTAAAGTTAGAT<br/> ATGGCAAAGCTTGTGATAGGGTATCCTGGGTCTTCTTATAAAGGTAATGAGAAGATTTGGATTCTCAGAATTCA<br/> TCATGGATATAGTTTGGAGGTTGATTTCCAATAATTGGTACTCAATTTTGGTGAATGGGAGGGCTTTTGATTTTTTT<br/> CAATCTACAAGGGGATTAATAA</p>                                                                                                                                                                                                                                |

147 NO ATGACAATAGTAGCCTACTGCCACAGGAGATGAAAAGAAAAGGAAGGGATTGCAGGAGCAAGCAGGGATTGC  
AGGAGCAAGCAACATCACTCAACTTAATGATGGACTTTATCATATGGAACGCGAGGGGAGTGAATAATGCGAGCT  
TTAGGCGACAGTGTGGAGCAATAGTGAACATTCACAAGCCCCGATTGCTCGTTCTACAGGAAACAAAAATGACT  
AAGCACCAAAGCCTCACAGAAGAGCTCAAGTTTGACTCTCAAATCCAATCTACTGCTAATGGCCTTCCGGAGG  
GATAGTGATAATGTGGAATGAAGACACCCTGAAGCTTGAGAACCTGTCAATAACCCCCCAAGGAATCCATGTCAC  
CATCAAGGTGGAGACTTCATTGAAGTCCTACATGCCAATGATAAATTAG

148 yes ATGAAAGTGGAATTTCTTTCATGGAATGTAAGGGGCTTAAATTGGGAGAGTAGGAGGGAGCTTGTGAGGATGCT  
GCTGAAGCAATGGGGGGCTGATAGACTAATTTTGGGAGGGGGAATTGTATTTGAATGGGAACCAAAGCTTAACTG  
GAAGAGTCTCTGGGTTAATGATGGTTTCAGCTGGTTAGTCACTGCAGTATACGCAGATTGCAATAGAGGGAGTAG  
GAGTGCTCTGGCAGGAACCTTCTTGA

149 NO ATGAAGATTACCCCAACCTCATCTAGTGGCATCCAGTTGATCAAGGCAGATTACTTGAGGGATGACACGATAAGG  
AGAAAGTTGCAACCGACTGACAACACTATGGTAGTTGATGCGACTACCTTGGAGCCTAACATTGTGCATCAGACT  
GCTACAATGGATCTTCTGGTATTGGAACCTTCTTCAACTGCTACATCTGTTGTACATCCCTCTATATCCCAGCCCC  
ACTTACACATACCTTAATTCGTTGGATGGATGGCCTTGTCCAATCAGAGGACATTAGAGCTTCTCATCTTGAGAAA  
AAGTGCACATATATGATTGATACAACCATTGAGGAAGCTCTTGTCACTTTGTGGCCGAGATGGAATATCACCATTC  
CCTATTTTTTTATTTTGGATGCTCTGAACACTGATGCCCAAGTTGATGTTGTGGTCATTGAGCAACAATGCTAG

150 NO ATGGTGGCACGGGAAATAAGAGGTTCAAGTAGCTGAACTCCATCTAGGAGGGCTGGCAAGCAAGCAGTGGAGCA  
CCACAAAGAAGAGTGGTTTAAAGTGTCCAAAGGAGGCCAAGTATCTCGGTGATGAATATGTCAATGAGGTGGGAT  
AGGAGCAAAGACACCGGTAGACATGCCACTCTCCATTATGCTAATCTAAACCAAGTTGAGAGGGTGTGGTTTAAAG  
ATTGTGAGCACTATTATATTGCCCTGTAAGTACACCTCTGAGGTTACTAGGGACTTGGTTGCTCCTAGTATACATGTT  
AATGAAGGGTATGCCAATAAATGTGGGGACTGTGCTGAGATGA

151 yes ATTAAGGGAACAAAGCAGTCAAAGAAGAAGAAGAATTTTACAGACGCCAAAATTTCCCAACCCAAAGAAAG  
CTACGGCTAGACTTCTTAAGCAGGAAAAGAAAGAGGAGTGGCAATGGATTGCAGAAGAGAGAAAAGCTCATGA  
ACAACCCATACTACAGTTCATTCAAGGTTATGATGAACCAGATTCTCCATACTAGCGTTCATTCAAGGAGGTGAT  
GAAGTGGAATATGGTGAAGACCTGGAGTATGAAAGCGAGGACTATCACTCTGAGGTGGAAGAGCCACTTAAACAA  
TATTGCAGTATAA

152 NO ATGGCTAATACTTACACTCCCAAGCAGTTGATGCGGCGGCTCCGATCGGCACCCCGCTCGTCCCCTTCATGCGG  
CATAAACCGGCTTCGGTTGAGATGCCTCGTTTCCATGGTGATAATCCCGAGAGTTGGGTCTTTCAGGCAGAAAGG  
TATTTTCGATTTTTATAATATTTCTGAGGATCATAAACTATCTCTCGTTCATGCTATTTGGATGGCGAGGCTCGTGAA  
TGGTATCGTTGGTTATTCCGGAACAAGCAATTGAGTGATTGGACTTATTTTGTCTTGAAGTGACAAGTAGATTTT  
TTAAGCGTACCTTGCTTCCCTGCGGAGGTACGTTTGTCCAAACTCCAGCAGACTTCCACCGTCTGTCGATTTTCAGA  
CTGGGTTTGGTCTATTGCTAATGAGACTAATGATGTCCCTGAGTCGTGGTTGGTTTCGGTGTTCATTCTGGCCT  
CCGAGCAGATATTCAAACCTGCAGTTCTGGTCCATAAACCCAAAACATTAGATGAGGCTTTTGAATTAGCCATACT  
CATGAACAACGCCTCTTGTGTTGAGCGGGGTGGGCCTTTTAAACCAGCCTTCACAAATCCCTTCTCTATTGCCAA  
ACCCTAATTTTTCATCCACATAATGTTATCCGCAATCGCTTCCAATTAACGCCTCTCCCTGGTGGAGATCCAGCA  
ACGCCGTGAAGAAGGGTTATGCTTCTGTTGTGATGAAAAGTACTCTACTTGTCAATAATGTAAAGCTCCACCACA  
ATTGTTGTTGCTTGAATACGAAACATAG

|     |     |                                                                                                                                                                                                                               |                                                                                                                                                                                                                                                                                                                                                                                                                                                                                                                                                                                                                                                                                                                                                                                                                                         |
|-----|-----|-------------------------------------------------------------------------------------------------------------------------------------------------------------------------------------------------------------------------------|-----------------------------------------------------------------------------------------------------------------------------------------------------------------------------------------------------------------------------------------------------------------------------------------------------------------------------------------------------------------------------------------------------------------------------------------------------------------------------------------------------------------------------------------------------------------------------------------------------------------------------------------------------------------------------------------------------------------------------------------------------------------------------------------------------------------------------------------|
| 153 | yes | GO:0003723;<br>RNA binding;<br>Molecular<br>Function;GO:000<br>3964; RNA-<br>directed DNA<br>polymerase<br>activity;<br>Molecular<br>Function;GO:000<br>6278; RNA-<br>dependent DNA<br>replication;<br>Biological<br>Process; | ATGGATGAAGATGGTGAATGGATTGAAGGAAATGACGGGATTGCAGAGGCAGCAGTGAGACATTTTGAAAATGC<br>TTTCAGACAGGAAACTCATATCTCCAACCTGGATGCTTTAAACCATATTGGAAGAATGGTGACTGAAGCGGATAA<br>CAAAAGGCTTACCGCCATCCCCACTATGCAAGAAATTAGGGACAGTGTCTTCTCAATTGACAATGAAAGTGCACC<br>TGGTCTGGATGGGTTGAATGGTTGCTTTTACCAAGCTACATGGAGTATTATAAGCAATGATCTTTCTAGAGCTACTG<br>AGGCTTTCTTCAATGGAGCTAAGCTTCCAAAGTTTTTTACTCACACTTGTTTGGTAATGATTCCTAAAATAGAGAA<br>CCCTCATAAGTTCTCTGACCTTAGACCAATCAGTCTGTGTAATGTCTCCACCAAAATCATCTCCAAGATCATCAATT<br>CTAGACTAGCTGGTAGTTTGCCTATGATCATTCTCAAAGCGAGTCAGGATTCATCAAGGGAAGGTCTATCTCAGA<br>GAATATAATGCTAGCTCAGGAGATTATTAACGATATCAAGAAGCCTACTAGAGGTGGGAACATTGTTATAAAGTTA<br>GACATGACAAAAGTTTACGACAGAGTATCGTGGGAGTACTTGTGCTTAATTTGAAAAAGTTTGGCTTCTCAGAT<br>TGGTGGGTTACATTACCAACAACACTACATTCCAACAATTGGTACTCAGTCATACTGA                                   |
| 154 | yes |                                                                                                                                                                                                                               | ATGGAAGATAGGGAAATAAACAGTCAAAGGAACATGGACATGGAGAATGTTGAGGTATCAAGTTCTTCAGTAGA<br>GCATTATAAAATGCATGGAGATAAGCAAGACGAAGAGAGGCAAGAACTCATTGAGATGAAGTACCCGCTGGTT<br>CTACAGATTTGAATAGTACAAGACTAGAGAAACATGGAGAGATTAAGGGGGTTGATTGTGCAACAGTTTTAAATC<br>CTGATGAAGATCAGATTTACAATGCTGCAAATATCTCTCCAAGGGCGATGGCGGTTGTTAAGTCAGCAAGAAAGG<br>GCAAGAAACGGGATGATGGAGAACCACCTCAAACCTTAGAGTTCAACCAAGAAAACAGGTTATATCCCAATAA                                                                                                                                                                                                                                                                                                                                                                                                                                      |
| 155 | yes |                                                                                                                                                                                                                               | ATGGCTTGGATTTCACTCCCGAATCTAAAACCCACGTTTTTTGTTAAGGAATCATTATTCTCATTAGCCAAGGCAGT<br>GGGAAAACCTATTCATCTTGACACGGCTACCATAAATAAGACAACACCTAGTTGTGCTAGTATAAATGTACAGGTA<br>GATTTATGTGCTGAGTTGCCATCATATGTTGAAATGGAGATTGTTAATGAGGAACTAAGAAATCGTGGGTGGAG<br>AAAGTGAAGGTTTCAAGTATGATATGCTACCCAATACTGTGGAAATTGCAAGCTACAGGGACATAATGCTTCTGAG<br>TGTAGAGTCTTGCCTCTAGAATTGCAGCAAGTGTACAAGGAGAATAGGGATAAAGAACTAGAAAGGGGAGACGA<br>TAAGGAGGAAGGAGAGTTAGAAGACACAGCAACAAGGGGCAGAGGAGATCGAACAAATTTGCCTAGACAAAAT<br>TGGAATCCAACAAGGAGAAGATTTATCAAGGAACCAACAAAATACAAACACAAGTGTCAATTTACTGGAGAA<br>AAATCTTTGTACTAGTAACTCCTTTGACTTACTGGCAGTTGAAGATGAAAGGAACGGGAATATGGACGATAATTCT<br>AACAATATTACATCAGTGGTTAACTGGGGGAGGGAATAAGGAGATAACAACAAAGGACTGGGTATCCAAGTC<br>TTTTCTTCATCCTCAAGGTGAAGGTAGGACGTATGGTGTAAGACAAGTCATGCAAAAACAACAGCAAGAGGAAG<br>AGATTGCAAAGACAGAACATTAG |

156 yes ATGGTTAAGCCTGACAAATTTTCCTAGAGCTGAAGTATGTGTCTTAATGGTATATTCTGCAAATCAAAGGGTTA  
TTTTCTGGACAGCATGTCCCAAAGAAGTTTATAGTGAACAGGGATGTTGTGTTTAGAGAAGATGTATTTCTTTTT  
CACCAGAAGACTAATGCACAACAGCATATGCAGCCAGTGTTACAGAAGGTGTTTCTCATAATGTTGCTCTTG  
CCTGAAGACAATGAGGACATGCATGTTATTAGAGAGGACACAATCATGGCAGATAACTTGACAAGACAAGATGG  
AAATCCTTGTGAGGAGAGTGACAATACAGATGCAGTCAATGAAGATATCAATGATACTGATACTACTGAAAGGGT  
TGATAATGCTCTTGAAAGGACAGAGGTCATAAGTGACATTGCAGCACAAGAAGCTCAAGGACCTAGACACTCTT  
CTAGGACCTCTCATCCTCCCATATGGATGAAAGATTATGTCACTCATGGATCTAAATCACATCCTTATTTCCCAAAGC  
AATTATGTTTCTATAGTGGAGTAGCTCCTCAATATAGAGCTTATTTGCCAAAGTTTTCTACAGAAGTTGAGCCCAG  
AACTATGAAGAAGCAGTAAAGGATACAAGATGGGTGAATGCTATGCAACAGGAGATTCAGGCCTTGGAGGAAA  
ATGGAACCTGGGAGCTTGTACCTTGCCAGCAGGGAAGACAACCTATAGGGTGCAAATGGGTATTCAAATCAAG  
TATAAAGCTGATGGTGAATTGACAGGTTAAGGCCAGGTTAGTTGCAAAGGTTACAGCCAACTGATCGAGGG  
GATTGA

157 NO ATGACTAATCAATTTGCAGCTCTAGCAGAACACGAAGAAGAAAATATTGATGAAAGTAAGGGTAAAGCTCTCACA  
GATAATAACAATGGGGAGAAGATAATCGAGGAGTCAACAAAGAGTTGGGTGAAAGACACTTTCAGTCACACCAA  
GGATCAAGAGGAAGACAAGAGTGGATTACAAACAGGGAGGACAGGAACACTTGAAAAAGAAAATGCACCCAC  
ATCACAGACAGATGGAAAGGAAAATAAAGAAGTGGAGGATGAAGGTATCTCGAACAAGGAGAATGTTTCAAGA  
CAAGAGATGGGAGACTCAAGTCCATCACAAAGTAATAATAAGGAGAGAACACCTAATACGAATCCTGGCAAAGA  
ACATGAAATCCAGACCTTGAAGAACTAACAGAGGTAGAAAAAGAAGTAAGGAGAGAAAATGAGGAAGATGAA  
GATCTTGAAGAAAACATGAATAGTGCAGCAAGGAATGAGGATTATCACCCAGGCAGATAG

158 NO ATGATTTCTTAGGTTGTACTTTGATTATTGGAAGGAGGCGGGTTGCTGACTTCTGTGGGATTTTCAACAAGGCAA  
TTAACACAATAAGAGGGTGGTATATTAATTTATATCTATGGGAGGAAGAGCTACCCTCATTAGACATTTGCTTCTT  
GTTATTCCTATTCATATCTTGGCGGCAGCCAGCCATCCCAAAGGTACAATTGATCAGATAGAAAAGAAGGTGGAC  
AAGAATATATATTGGAAGGTTGGGAAAGAGGAAGTGGCCTTTTGGCATGATACTGGTCCTACCTTGGTCCTCTAT  
CCTCGTGGGATCATGTGAACACTGCCCATGATTTGACTAAATCGAATGAAGTTCTGACGAGTGGTACTAGCTTGG  
AGGTGGGAGAACCTGAGCATCCAACCTTCGGGTGA

159 NO ATGGTAGAAATAGCTGATCTTGGAGCCATTGCAAAGGATAGAGATGAATGTGGTGGTATGTGGGACATGATGAG  
TTTGGTGAGCTTGGGGGGGAGGGAGTTTACCATTCCAGTCCATCGAAGTGGGAGGTGACTCTTGGACTATGAT  
GACTGTTAGAGGCCCTCCTCTTAGAGAGAAAGCTAGCTTGGATGGGTCCAATGATAGTAAGGAGGTAGGGCTT  
AGTTATATTGGCAATGATATTGGTAACAATTTTGTAAACCAATATTACACAGGACAATAGGCCTAAAGTTCTTCAATG  
TAGTAGCATTCTGACATTTAAGGATTAG

160 yes ATGGATGTAGGCCATGGTTTCTTTATATAGGACCATTCAAGTCTATCAAAGCCTTTTCAAGATCAATTTTGAGAA  
TCATGTTAGGGCTCTTTTCTTTCATTTTCCCAAATAGGAAATGTCCTTATGTACAATGATTGCATTGTCAGAGGCC  
CTCCTATTGAAAGAAAGCTTGGCTTGGCTTGGGCCTATGATGTTGGGGATGAGAGGCTTAATGCGATTACAACG  
ATCTCTGTTACCTATTTGTAACAGGTATAGAGGATTGCACAAAAGCTTCTTGGCAAACATGTGATGGAGGCTAT  
CTGGTCTTGGAGCTTTGAACGGCTTGAAGAAGCTTGAAGAGCAGTGGTATCTATGTGTCCCTATGGGGGCATCCAG  
CCTTTAG

|     |     |                                                                                                                                                                                                                                                                                                                                                                                                                                                                                                                                                                                                                                                                                                                                                                                                                                                                                                                                                                                                                                                                                                                                                                                                                                                                                                                                                                          |
|-----|-----|--------------------------------------------------------------------------------------------------------------------------------------------------------------------------------------------------------------------------------------------------------------------------------------------------------------------------------------------------------------------------------------------------------------------------------------------------------------------------------------------------------------------------------------------------------------------------------------------------------------------------------------------------------------------------------------------------------------------------------------------------------------------------------------------------------------------------------------------------------------------------------------------------------------------------------------------------------------------------------------------------------------------------------------------------------------------------------------------------------------------------------------------------------------------------------------------------------------------------------------------------------------------------------------------------------------------------------------------------------------------------|
| 161 | NO  | ATGGGAGTGACAGAAGCCCTAGATTTAATTGGGATGTTATCAGACTCACTTCTCGTCAAATTTCTCTCCCTTTTGC<br>CGGCACAAATTGCTTTGACAACAACCTATTCTCTCTAAGTGGTGGCACTATGTCTTGCCTTATGTTGATAGCTTCAAT<br>TTTACTCGTAAAATTTTCTGAAAATAAAAGACTTTGTATTCTTTGTAGAGTATGAAATATAGTTCATTCTTTTGT<br>TCCAAAATAAAAAGACTTAGAGATCACTGCAGTCACTTGATCCATACAAATCACATGTTAGTCGATGGCTTAGTT<br>TTGCTATTGAAAAAATGTGTAA                                                                                                                                                                                                                                                                                                                                                                                                                                                                                                                                                                                                                                                                                                                                                                                                                                                                                                                                                                                                                   |
| 162 | yes | ATGGTGTCTGAAAATGCGCAAACATCTACCAGCAGTGGAAATTCAGGTGACACAAACAGTTGATCTTAATCATCCC<br>CTGCATTTACATACATCTTATTTGAGTGGTGTTCCTTGATTTCTCTTCAATTGACTGGAACAGAGAATTACTCTATT<br>TGGAGTAGATTTATGCGCATAGCTTTGTTAAGAAGAAACAAGCTAGGGTTCATAGATGGTACATGTAAGAAAGAG<br>AAATTTGGAGAAGAATTATGGGCTCAATGGGGGAGGGCTAATGATGTAGTGTATCGTGGTTGATGAAAGTTGTG<br>TCTAATAGTCTGTTAAGTGGTATTGTTTATGCATCTAATGCATATGTTGTGTGGGAAGAATTGAAAGAAAGATTTGA<br>TAAGGTCAATGGTGAAGAATTTCAATCTCCACAAAGAAATTACGTCTTTAACTCAGGGAACCTCATCTGTTTC<br>GACCTATTTTACCAAGCTTAAAGGGTTATGGAATGAGCTTAAATCTCTTGTCCCTACTCTTGGGTGTGAGTGTGAA<br>AAATCCAGGGATTTCTTGATTTATCTGTAA                                                                                                                                                                                                                                                                                                                                                                                                                                                                                                                                                                                                                                                                                                                                                               |
| 163 | NO  | ATGGCTAAGGAGTTGTGCAAGCTCCGTTCCGCTTTCGATAACCAACACAAACTGATGCAGGAGGTCTTCTCTCAG<br>GTGGCCTCAATTGGTTCACAGTTGAAAAGTTCCGGCACGAAAACCTCTCGTTCAAATCAACCGATGTTGCTCTG<br>ACGGCAAACCCTCATGGTGGTGTGCCCATCGCACTCTGGCACAACCGGCGTGGTGGAGTTGAGTCGGTTCTC<br>CGGGGACTAG                                                                                                                                                                                                                                                                                                                                                                                                                                                                                                                                                                                                                                                                                                                                                                                                                                                                                                                                                                                                                                                                                                                      |
| 164 | yes | ATGGTTGTCATTCATCCTTATTTCTACAGGATGGATGATCTGCAGGAGCAGAGGACCAAACCTTTCTCATGACGTGA<br>TGATAGACATCTTGAAGCGACTGCCGGCAACATCCCTGATAAGATTCAAGTGTGTATCTAAAGATTGGTACTCTTT<br>GATAAACAGCCCTGATTTTATCTCTATCCATTACAATTATGATTCTCTCTCAAATCACTTCATATTTTTTAAGCGCTA<br>CCTCAGGATTGAGGAAAGTACGGACTCCATTTATTATAATGGTACAAATATGCTATCCTTTTCAATCAAATGATGAAT<br>CTTTCAAATTCATAGCGCCAAATATAGAGTACTCGGATAATTATGTAGGTGTTAACATTGCAGGTCCTGCAATGGC<br>ATAATCTGCATTTCTAGCTACAGAAGTATTCTTTTATATAATCCAACCTTAAGAGAATTTTGGGAACCTCCGCCTAG<br>TATTCTACCTCCTCCCCATACATATCTACTGATTCTAAAAAGCTTAGCTATCATATGACCATGAACATGGGAATCGG<br>GTTTGATTCTAACACTAATGATTATAAGATTGTTAGAATCCTAAATTCCAGTTATGAACATGAATGTGATGAGTTTG<br>ATAATTATAACAAGTATGTTAGTACGGTAGAGGTCTATCGTTAAGTACAAATTGTTGGAGGAAAATTGAGGATCT<br>AGAATGCATAGTAGATTCCTTTTCATTTTCTCACGTAAGTTTAAACGGAGCTTTTTCATTGGGTTGGATATACGGAGT<br>CAGATGATTATTGCATCGTTTCTTTTCGACTTCAGCACCGAGTCATTCAAACAATAACCTCTCCTGAGGGCTTATTT<br>AGTGACGGAAGAAAGAGTCCTAATCCTTTTCGTTTGAAGCAAACCTAACTCTGATTTGTTTTACAGAGATTAC<br>TATCCTCCAGAGGAGGTATTTACCAATCAATTGATATATGGGTGATGAAAATATATGGTGTGAGGAATTCCTGGAT<br>TAAGGAATTTACTGTTGGACCATTGCTTATAAAAGCACCTTTGTCAGTTTGGATGAATGACACGGAACCTAATGATG<br>GAAAGTTACAATGGAAAACCTGGTCTCTTGTAAATCTCTTTTGAAGAAAACCTAAGGACCTTGATATGTATGGTGTTC<br>CCCAGACATTGGAAGCTATTGTTTGAAGAGAGCTTGGTTTCCATCAAGAAAGAGAGAGAGAGAAATAGTCTC<br>GATCTAACACCACTGTCCATACATGGCATATTGA |
| 165 | yes | ATGTGGAAAACGGGATATGGTGGGACACAAGTCTGGGAGAAGATGCTTCAAGCAAGGGATCAGGTGGAGCATC<br>AAATTTGGTGGCAAACGAAAATGGCACAGCCAGTTTATGGCATGATAATTGGATAGGAATAGGAGATTTATACA<br>CAATTTGTGGGCAAAGATATGAATGGGATACTAATCAACAACCTTATCCAAGAAGCGGTAAGACATGGAGAGTGGG<br>ATGTATAG                                                                                                                                                                                                                                                                                                                                                                                                                                                                                                                                                                                                                                                                                                                                                                                                                                                                                                                                                                                                                                                                                                                      |

|     |     |                                                                                                                                                                                                                                                                  |                                                                                                                                                                                                                                                                                                                                                                                                                                                                                                                                                                                                                                                                                                                                                                                                                                                                                                                                                       |
|-----|-----|------------------------------------------------------------------------------------------------------------------------------------------------------------------------------------------------------------------------------------------------------------------|-------------------------------------------------------------------------------------------------------------------------------------------------------------------------------------------------------------------------------------------------------------------------------------------------------------------------------------------------------------------------------------------------------------------------------------------------------------------------------------------------------------------------------------------------------------------------------------------------------------------------------------------------------------------------------------------------------------------------------------------------------------------------------------------------------------------------------------------------------------------------------------------------------------------------------------------------------|
| 166 | yes |                                                                                                                                                                                                                                                                  | <p>ATGAGGAGTCGCCACACTTTGATTGAAAAGATGTTGAGTTCTCTAGATAATTTGAAGGGGTGGCATGCCCTATTAT<br/> TGACAGATGTTACGCCCCGTGGATTA AAAAGGGAGTGATTATTA AAAAGAAGGGCTTCAACATAGTTGAGAGG<br/> GCATCTAAA ACTAGGGGCGATCATTGGGCCGATGATAACCTTGAGGGCAAGCAAATCAAAC TTCATTGCCTTTT<br/> CTTGGGTTGATCACTTCTTTGTGTCGTAAAGTAGAGGCCAAGTACTCTACGGATAAGGACAATCGAAATAAGAAG<br/> GCGCCAGTTGACGTTTGTCCC GTGGTTGAAATAGAGTCTCTACGGGCTGATCTTGTAGGCCCGCTCCGACTGTT<br/> GAAGCTTTAGAGCGCAAGAAGGCCGAGAGTAGTTCAGATGAGTTGATTGCCTTAAAGGCTAATGTTATTAGGTTG<br/> AGAAAGGACGTGGATGAGCTGA ACTCCACCGATATATATATGTTGTGGAGAGATGTTACCATCCCCGAGGGTCCT<br/> GTGACTGAGATTCCTCCGGCCATTGTGACTAGTAGTGTGGGCGTACAATTGTTGTTGAGCATGCAGTTGATGATG<br/> ACAACTCCAAGACTTTTCGAGAGTAATGTTGAGGACTTAGATGTGACTGACATATAG</p>                                                                                                                                                                                                           |
| 167 | NO  | <p>GO:0003723;<br/> RNA binding;<br/> Molecular<br/> Function;GO:000<br/> 3964; RNA-<br/> directed DNA<br/> polymerase<br/> activity;<br/> Molecular<br/> Function;GO:000<br/> 6278; RNA-<br/> dependent DNA<br/> replication;<br/> Biological<br/> Process;</p> | <p>ATGACAAGCCTGAGAGCTGAGATAACAACAGTTAGCCAATATAGAAGAGATTTTCATGGAGGCCAAAATCTAGGTGC<br/> CTCTGGCTCAAGGAAGGGGATAGGAACACCAAATACTTTCAGAAGATTGCTAATTCTAATAGAAAATCCAATTGC<br/> ATAGACAGATTTCTGGTAGACAATGTGGTCATTAAGATAATGAGACAATTA AAAAGAAGACACTAGAGTTCTTT<br/> GAAGGAGTGACATTGAACAAGAAGAGTGGAGGCCCTACAATCATGTTTGAAGGAATTGCTCCATCACAGCGGA<br/> GAAAAGCAGTAACTTAGAAGCAATTTTTGGAGAGAAGGAAGTACTAGCAACCATTAAATCAAGTGCCCCTGACA<br/> AAGCCCCCGGGCGTACTGATTTTACTATGGCTTTCTTCAAGAGCTCTTGGGAGTTTATCAAGATAGATCTATTAGC<br/> AGTTATGCAACACTACCATCAACATTGCTGGATAGTTAAGTCTTGTAAATGTTTCATTCATACCCTTATTCTTAAGA<br/> AAAATGGGGCAAGCGA ACTTAGGGATTACAGACCTATTAGTTTGATTGGAAGCATGTACAAGATCATTGCAAAAG<br/> TCCTCGCAAATAGATTGAAGACAGTTATGGGGAACTAGTCTCAAACCAACAAAATGCCTTTATCAAATGGAGAC<br/> AAATCATTGATGCCTTACTCAAGAGTGTGATATATCATGTTAATGGGGTGCAGAACATTGAGAAGCTGGCAGACAT<br/> ATTGAGTTGTAGAAATGGAATTTTCCCAATCACTTACTTAGGCCTTCTATTGAGGGCTAAATACAAGCGGAAAGCA<br/> TCTGGAGTGGAATGA</p> |
| 168 | yes |                                                                                                                                                                                                                                                                  | <p>ATGCCAGCACACAAGCCCTGGCTATGGACCCACTATTCTCATATTACTCTCATTTAGGCTTATCAACAGTGGAAC<br/> AACGAGATACAAGAAAGAGGTCATTCAAATTCTACA ACTTTTTAGGAAAACATCCAGATTTACGAGTAAGGTAC<br/> AAGCAAGCTGGCAGACACAAGGTGGAGGTATGAAAGCGGTATGGAAAAATTTGAAGCTAGTGAGGAGAGAATT<br/> GCAGAATTTAAACCATAAGGAATTTATGGGTGTCTCTAATAAAGTCCAGCTTAGAAGAGA ACTCATAGATAAAGA<br/> AAGCAACATGAGGGTTGTTCCAGTACCTCAAAGCATTCTTGATGAAAAGAAAGCACTGAGAATAGAGTTGGACA<br/> TATGGAGTTTGATTGAAGAGGGCATATATAAACA AAAAATTCAGAATACAATGGCTCAAGCTAGCTGATGCTAACAC<br/> TACCTATTTCTTTACTAGTATAAAAAGGAAGGAAGTCCCATAATCAGATCATTATGCTAACCAAAGAGCATGGCACT<br/> CTCATTAGAGAACCATCATTAAATCACC AAGGAAGATGTGGAATTTTACAAAAGTTACTAGGACAAAACCACCGCT<br/> CATATGCCAGTTACACAACCAGAAGTGCTTAAAGTTGGACCTGTCCTTATAAGATCACAATAA</p>                                                                                                                                                                                                   |

169      yes      ATGAATGCAAGACAAGCTCAAACCTCTGCGTGTATTTCGATTGCCTTACGCCAACACCATTTTAAGCCTCATTTCAGATCATCATCGCTCTCCCAAACGCAGCAAGTTCATGCTCATATTCTCAAACCTGGCCATTCCAATGATACCCATTCCACCAACAAGCTCCTTTCCCTCTACGCCAACTTCAACTGCTTTGCTAATGCAGAATCTCTTCTTCACTCGCTTCCCAACCCCAATAGCTTCTCTTTCAAATCTCTCATTACGCTTCTTCAAATCTAATCTTTTTAGTTACACCCTTGTTTTATTTTCTCGGTTACTATCAGCGTATATTTTACCTGATGTACATGTACTTCCTAGTGCTATTAAGCGTGTGCTGGGTTATCGGCGTCGGAAGTTGGGAAACAAGTTCATGGGTATGGTTTAAACAACCTGGGTTGGCGTTGGATTCTTTTGTTGAAGCTTCTTTAGTTTCATATGTATGTGAAATGTGATCAGTTGAAATGTGCACGTAAGGTGTTTGATAAAATGCGTGAGCCGGATGTGGTGTCTGGAGTGCTTTAACTGGTGGTTATGCGAAGAAAGGGGATGTTGTTAATGCTAAAATGGTGTTTGATGAAGGTGGGAAATTGGGTATTGAGCCGAATCTTGTTTTCGTGGAATGGGATGATTGCGGGGTTAATCAGAGTGGATGTTATTCGGAGGCAGTTTTGATGTTTCAGAGGATGAATTCGGACGGGTTTAGGAGTGATGGGACGAGTATATCGAGTGTTCTTCTGCAATTAGTGATTTGGAGGATCTCAAGATGGGTGTTCAAGTTCATAGTCATGTGATTAATGATGGGTTTTGAGTCTGATAACTGTATTATCAGCGCGTTAATTGATATGTATGGGAAGTGATGGTGTACTTCGGAGATGTCACGAGTGTTTGAAGGGGCGGAGGAAATAGATTTGGGTGGTTTTAATGCTTTGGTTGCTGGGCTATCGCGGAA TGGCTTTTAA

170      NO      ATGAATCCATCAATACCAAAGTGGCGCCTAAACCAGTTGTTATGCTACATGGAGAACCTAACATTACGTGGAAATCATCGGAAGTCAGATCGCTAATCTTTCAAGAAAATTTGCAATATGCTATCATAGGCAAGTTTTTCGTATGGCAAACCGCCATAAAGGAATTGAGGAGAACTATAACCAGGCCAATATGGAATAAAGAGTGCATGCACCATAGGGGTTCTAAACACAAGGCATGTGTTGATAAGACTGACGACGATGGAAGATTATGTGAATCTTCTATCTACGTCAGCTTTTTATGTTAAGGCCAAGGAGTGTTATTGGCATATGAGAACCCTTAAATGGGATCCATGGTTTGAAACGGATGTGGAAACAACGATTGTAGCAACATGGATATCATTCCCAAATCTACCACCAATTTTTTTTTGCAAATGAGGCAATCTTTACAATAGCTAATGCAGTAGGTAAACCGTTGACGGTGGATATGGCGACATAA

171      NO      ATGATTGAAACCCCTAATCCACCATATGAAAGAAGAATTAGAAGCAGAAAAGGCATTCAAAAAGAAGACAGGTC AAGTGTAATCAGCAGGATCCTAAGGTTCAAGATAAACACCTAAAAATCCCTACTGACACTGGAAATAACAGCAAACGTGGAGAAGTTGAGGTTTCTAAGGACAACGTCACTATGGATGTGGTGGAAAATATGGACCCAGGGAATAAGAGGATAAAGGAAATGAAAACCTCAGAGGGACATGGAACTGAACTACTAAGGAGCCTATAGTGGATTCAGATAGGAAAGCAACCACGTCAAAGACCACAAACATAACGATGGACAACCAAATGAAGGATGAGTATAAGCACTATGAATC GATGTCAGAGAAGGAGATAAAAAGAACAACAATTTTCATGATGTTTCAGGATCCTAACCAAGACACAGATGCCAACA CAGAGTTGGGAAATAACATGAAAAGAACATTGTCGATACGTCCAAAATACAAGAACAATCTCTGA

172      NO      ATGAGAGATGATGAGTTCCTAGCATCCTAGAAGCAAAGGAATTGGAAATCACTCGACTTAGGTCGTGCTTCAAAAGGAAAGATCTGAGGAACCTAGTCCTAGTGCTGATGTATAGGGTGAATGGACAAATTTTCGAGCACAAAATGTGCAATGCCTCGTTGAATGAGGAAGTTAAGTCTTTTACCAAGCAATATTGCAGGCTCATCCTAAGGCAATAAACAGATGAATATTCTCATGCAGTCTTTTCCAACAAGCCCTCCATCCTAA

|     |     |                                                                                                                                                                                                                                                                                                                                                                                                                                   |                                                                                                                                                                                                                                                                                                                                                                                                                                                                                                                                                                                                                                                                                                                                                                                                                                                                                                                                                                                                                                                                                                                                                                                                                                                                                                                                                                                                                                                                                                                                                                                                                                                                                                                                                                                                                                                                                                                                                                                                                                                                                                                                                                                                                                                                                                                                                                                                                     |
|-----|-----|-----------------------------------------------------------------------------------------------------------------------------------------------------------------------------------------------------------------------------------------------------------------------------------------------------------------------------------------------------------------------------------------------------------------------------------|---------------------------------------------------------------------------------------------------------------------------------------------------------------------------------------------------------------------------------------------------------------------------------------------------------------------------------------------------------------------------------------------------------------------------------------------------------------------------------------------------------------------------------------------------------------------------------------------------------------------------------------------------------------------------------------------------------------------------------------------------------------------------------------------------------------------------------------------------------------------------------------------------------------------------------------------------------------------------------------------------------------------------------------------------------------------------------------------------------------------------------------------------------------------------------------------------------------------------------------------------------------------------------------------------------------------------------------------------------------------------------------------------------------------------------------------------------------------------------------------------------------------------------------------------------------------------------------------------------------------------------------------------------------------------------------------------------------------------------------------------------------------------------------------------------------------------------------------------------------------------------------------------------------------------------------------------------------------------------------------------------------------------------------------------------------------------------------------------------------------------------------------------------------------------------------------------------------------------------------------------------------------------------------------------------------------------------------------------------------------------------------------------------------------|
| 173 | yes |                                                                                                                                                                                                                                                                                                                                                                                                                                   | <p>ATGGACTGTACTCTGGTGAACAGTGATGATCAACAAATAACTTGTGACATTAGTCATGTAATGTCTCCCCATCATG<br/> TTAGGATAACTTTTGTATTATGCAAAATGCAAAGATACCCTCAGAAGACCCCTTTACGATAAAATTCTTCATCAAGA<br/> CAATACTACTTTGGCCCTGGTGCACAGTAGGAGATTTAATGTTATTACTAATCTAGAAGAGAAGCTTGGTGGTGTC<br/> CCCTACAACATGAAAACGAGCTTTGAATTCATAAGCATCATTGAAGCTTGTGGGCAAATGGATTTAGGTTTAATG<br/> GTCAGAAATATACTTGGTCCAACCAAAGAGGTATTAATTTCAAGATTTGGAAAGGACTTGACAGAGCTATGGTTA<br/> ATAATAAATGGTTAAAGGTCATGCCTTATAACCACCATTACTCACTTGCCATCTATGGGGTCTGATCACTCTCCTCTT<br/> CTCATGGAATTAATGGAAAAGCAAAACAACCACATCAGGTACTTCAAGTTCCTCAACTGCTGGACAGAACAAAA<br/> TTCTTTCCTGGACACTATCAAAGAATGTTGGAACAAGAAAATAAAAGGTGATCCTATGTGGAGTTTCCATAAAAA<br/> ATGA</p>                                                                                                                                                                                                                                                                                                                                                                                                                                                                                                                                                                                                                                                                                                                                                                                                                                                                                                                                                                                                                                                                                                                                                                                                                                                                                                                                                                                                                                                                                                                                                                                                                                                                                                                           |
| 174 | NO  | <p>GO:0003723;<br/> RNA binding;<br/> Molecular<br/> Function;GO:000<br/> 3964; RNA-<br/> directed DNA<br/> polymerase<br/> activity;<br/> Molecular<br/> Function;GO:000<br/> 4190; aspartic-<br/> type<br/> endopeptidase<br/> activity;<br/> Molecular<br/> Function;GO:000<br/> 6278; RNA-<br/> dependent DNA<br/> replication;<br/> Biological<br/> Process;GO:0006<br/> 508; proteolysis;<br/> Biological<br/> Process;</p> | <p>ATGGCCGAAGGTACTIONCATTGGAAGGTCACCTTATGACAAGCTAGCTCGACATGATGAACTGTTGACAGATCTGTTG<br/> ACCTCACAAACAGGAGGTACGAAATACACAATTGGGAATTCAAGGCACGCTAGAGTTGATTTTAGAAAGGCTGGG<br/> AACATTGGAAAGGGCTCCTGCTGGCCAGAACAATGGAGGAGGACTTTTGCCTACTCCAAACCAAGACAAGAGG<br/> AACAGACCTCAACAGGCTATGGTCTTACCTCCTAAATGGGAGCTGCCTAATTTGAGGGGCATGAACCTAAGGTA<br/> GCTATTGAGAAAGCTCGGATGAAAGATATGGCCATTGAGGCTGCAGAAAGGAGAAACAAAGGGGCTACCAGATC<br/> TAACCCATCATTAGCACCTGTGGTAGCTAACAAGGCGCCTGTTGTTCCAATTACCAGGAACACCTCTTACAGACT<br/> CACTCCTGAGGTCTACGAGTATAGGAAGTCCAATCACCTATGTTTTCGGTGTGGAGAGAAGTATGGACCGGGGCA<br/> CATTTGTAAGAAGAGGCAGCTGAATTGCCTCATGGGAGTAGTAGAGAGTGAAGTGGAGCTAGATCATTCAAGTGG<br/> TAGAAGAAGAAAACTCGGAGATAATGATTGAAGGAGTACTAGAACAGGAGATACAACAAGTTGTATGTCTAAAT<br/> GCCTTAACAGGACACAATAAAGGGGAGAATACAATTTTGGTTGGGGTACTGTTAAGAAACGACAATTGGCTATA<br/> TTGATAGATTCAGGCAGTACTCATAGCTTTATTGATGAGCAAACGGTCATAGCGACTGGTTATAATCCAAGTCATTG<br/> CCCACCAGTTAGGGTGACAGTGGCAGATGGAATTATGTCATGTGTACTTCTCAGTGCAAGGGTTTTTTGTGGAA<br/> AATGCAAGGTCGATCCTTCCTAGAGGACCTACTAATCATTCAATTTGGGTGGTTGCGCCTTGGTGTAGGGAACGAC<br/> TGGATGAAGAGACACAATCTTACAAAGTTTGATCACGAAAAGAAATGTGTCACTATAGGCAGGAAGGGAAACAA<br/> GTTGGTTTTACCTGGTTTTAGCGGATGAGGGCAGGTTAAGCATGATGTCTAGTGGAGCTATGAGCAAAATGTTGAA<br/> GAAAGGGCAAGCTCTCGTTGCTCACCTCTTTATGATGAGTCTGGTGACAGCAAATGAAGAAGTGGAAATTGACA<br/> TTGGGATCCAGGAGGTGCTAGAGAAGTACCCTGAAGTGTTCGCGGAACCAAAATCTCTACCACCTGCTAGAGCT<br/> TTTGACCACTCCATACCACTCAAGCCTGGGGCTATGCCACTTAGTTTTGAGGCCATACCGATACAACTATCATCAGA<br/> AGAATGAGCTGGAGAGACAGGTAAGGAAATGCTCACTAGTAGGGTAATACAACCAAGCCAATCTCCTTTCTCTT<br/> CACCTGCCTTGCTAGTAAAGAAGAAGGATGGGACATGGAGGTTTTGCGTTGACTATAGAGGCCTCAATAATATCA<br/> CCATTAAAGACAAGTACCCCATTCCTATTGTGAATGATTTGTTAGATGAATTACATGGCGCTTCATTCTTTTCTAAA<br/> GTGGATCTTAGGGCAGGTTACCACCAAATTCGAATGAAGGTAGATGATGTTTACAAAACCTGCTTTTCGAACCCAC<br/> ATAGGACACTATGAGTTCAAAGTGATGCCTTTTGGACTACCAATGCACCAGCAACCTTTCAAGCATTGATGAAT<br/> CAGGTTTTTCAAACCTTTCTTAGGAAGTTTGTCTAGTTTTCTTTGACGACATACTTATATAACAACATGACAAAGGT<br/> GGATCACATAACAACATCTGAAAGTAGTGTGGAGACTCTGAAGTCACACTCATTATTTGCTAAGAGGTCTAAATGT<br/> TCCTTTGGGCAACCTCAAGTGGAGTATCTAGGGCATATCATCAATAAGGAAGAAGTAGCTACAGATCCTCAAAAG<br/> ATCAAGGCTATGGTAGATTGGCCTAGACCTAAAACACTCAGGGCTCTCAGGGGGCTTCTAGGTCTAACTGGCTAT<br/> TACGGGAAATATGTTGAGAACTATGGTACCATGTATAGGCCACTAACAGATTTATTAAGAAGGAGGCTTTCAAAT<br/> GGAATCCTGAAGCTGAAATCGCTTTTGACTTAAATCTGCAATGA</p> |



175 NO ATGGAATCACAAACAATCGACAAAGATGAAAATGATAAGGAAGAGAGAAACAGTTCAGGGGCGAAGTATAGTAG  
GGAAGATGATGAAGATGGGAGAATAAAAGAGATCGTCAGAAATGCATCCGAAGAGATAGATGAACATAAAGAGA  
TTCCGGACCTTCAGGAACCTACAAGAGAAGAGCAACAAGCCAGAAAAGAGGGTGAAAAGGATGAGGAGATAG  
ATGACAACATCGATAAAGTGGCAAGGGAAGGAGATTTATCTCCAAGACAGATTTCTAAGTAAAGTGGAGTG  
AAGAAAGGCAAAACAACCTCAACCTTCACTTCTTTTACAAGACAAAACAAGGATCAGGAAGGCATTATTCTGGAA  
TATTAGGTCTGTCAAATCTCAAAGTCTTTTTGAGAGAGTGATGGAACCTTAATAGAAGACACCAATACAGTTACATA  
GCTCTCATGGAACCTTTTCAAGGACCATATGAGTTAGAACCTTTACAAAATAAAATTTGGGTACAACAAAGGCTTATA  
GTAATTGCTCAGATAAGATTTGGGTTTTCTTAGAGGAAGATTGGGATGGAGAAGTGATTAAGACTGTACACAAC  
AAATAACCATGAGGTTAAGAAGAGACAACTGCAAGTTTTAATCATAGCTGTTTATGGAAGATGTGATGCGATGG  
AAATGATGGAACCTTTGGGAGGAATTTGAGGACATTGCAGAAACAATCAGTCTCTTTGGATGGTGGGTGGAGATT  
TCAATGTTATTACAAAGGAGGAAGAAAAACAAGGCGGATTGGTATTTACTCAGGCAGAGGCAATTCATTTCAATC  
AATGTATTAACAATTGTGCATTGATAGAGATGAAGTATATGGGAAGCAAATTCACCTGGTGGAAATGGTAGTATAGA  
AGATGATTGCATATTTAAACGGTTGGATAGAGTTATGTGCAATCAAGAGCTGCTGGACACTTTTCTAGTAGTGAA  
ATTCATCACTTGGTGAGACGAGGCTCAGATCATGCTCCGTTACATGTCGTTTGAATTCGGAGGAGGAAATTAATA  
TAAAGCCGTTCAAATTTCTTAATTTTGGAGTAAACATCCTAATTTTACGAAAGTAGTTGAGGATAATTGGAAGAT  
AGATTTTATGGGCAGTCCGTTTGTGGAGTTTCAAGTAAAGATGAAAAGGTTAAAGGGGCATTAGCTAAATGGAG  
CAAGGAAACTTTTGGGAACATATTCCAACAGATTGCCACTTTAGAAGACGCAATCAGAGTAAAGGAAATTC AATT  
AGA ACTAAATCCCTCAGCAGAAAATAGAGCAACATTAATAAAGGGGAAGTAGAACTGAAGAAATATTTGTATTT  
AGAAGGCGAATTCTGGAAACAGAAGGTTGGAATGAGGTGGTTTAAAGGATGGCGATAGGAAGTCAAAGGAAGAA  
GAAGGAGATTACAGATTACAGAAATTC AAACAGATCAAGGGGACTGGATTACCTCTACAGATAATATAG

176 NO ATGGAACCATTTCAAGATAGACAAGGGCTAGAAGATTATCGAAGAAGGTTAGAGATGCAACATGCTGTTGCAAAC  
TCTAACGGGAAGATATGGGCGTTTATGGATGAGGTAATGGAGTATGAAATAGTGAGAGATGAGGATCAAATGTTA  
ACCCTTAAGTTGCATAATCAAAGTGCTGGAGTGGATGTGATGGTCTCTCTAGTGTATGCTAAGTGCACACGGATTG  
ATAGACTAATCCTGTGGGAGTCTATGTCTGATTTAGCAAGTACAATAAATTTACCATGGATGGTTGGAGGGGACTT  
CAATGTGATATGTAATGAGGAGGAGAAATTAGGAGGTAGACCTGTTACGGAGGCAGAGGTAAGGGACTTTAACTA  
TTGTATAAATGTATGCAATTTGGAGGATAGGGGCTTTAAAGGTAGCAAATACACTTGGTGGAAATGGTAGATTGGAA  
GAGGAATGCATCTTCAAAGACTAGACAGGGTACTGGGGGATGAAAAGCTGCAAGATGATTTTTCCGATATTAGA  
AGTGGAGCATATGGTAAGAAGTGGATCGGATCATACTCTTTATCGATCACTTTCAAACCAATACAGAGGAGGT  
GATTAG

177 yes ATGAAATTCAGCACAAACAATAGAGCATGCCTTATTACAGCAGTCTATGCACGCTGCAATGCTTTGGAGAGGTTG  
GAATTGTGGGAACAAATTGAGGACATTGTTCAAGGGACTCTCTTACCTTGGGTGGTTGGCGGAGATTTCAATGCA  
ATTCTCAATGAAGAAGAAAAGTTGGGGTCTTGA

|     |     |                                                                                                                                                                                                                        |                                                                                                                                                                                                                                                                                                                                                                                                                                                                                                                                                                                                                                                                                                                                                                                                                                                                                                                                                                                                                                                                                                                                                           |
|-----|-----|------------------------------------------------------------------------------------------------------------------------------------------------------------------------------------------------------------------------|-----------------------------------------------------------------------------------------------------------------------------------------------------------------------------------------------------------------------------------------------------------------------------------------------------------------------------------------------------------------------------------------------------------------------------------------------------------------------------------------------------------------------------------------------------------------------------------------------------------------------------------------------------------------------------------------------------------------------------------------------------------------------------------------------------------------------------------------------------------------------------------------------------------------------------------------------------------------------------------------------------------------------------------------------------------------------------------------------------------------------------------------------------------|
| 178 | NO  |                                                                                                                                                                                                                        | <p>ATGAGAAAAAAGGACAGAAGAAATTGTTACCTTTTGAATCAAGTAGTAACTTCCTTCTCTAGATGTTCCAGAA<br/> TATACGCAGTGTGGTGTGCTAATTACACTCATAAGATTGGAGCTGATGCAAATTTGATAGAAAATAGTCGATGTG<br/> ATTTGCCTGAGGATATTGCAAATGATCTACATCATCAAAAACCTCCAAAAGTGCGGTTGATGACGACAATGAAATC<br/> AGATACAATTGTTGCACCTATGGATAAGAGTATCAAGATTTCTCAGAAAAAGAGGAATATGTTTCAAGAAAATGG<br/> TCGCAGGTTTGGGATGAATAACATAGATGGTAAATCAGCAAAAAGATCGAAGGCATGTAATCAAAAATAAAAAAGT<br/> TATGAGGAGTTCTATGAAAAATGTAGTTACTAATTCATGTACAGGAGATAATGGATTTGATGGAGAGAAAATTTGT<br/> CTGCAGAGTGGTAGAGAAAAGTGTCAATATTAAGCATAACAAGTAAAAAGGACTCTGGAGTAAGCAGAAGGAAACA<br/> TAATCAACAGGCTCAAGTTGTGACTGGATGCTCTCTTCAAATTTCTTTGGAAGGAAAAAACAGTGATCTTGACAC<br/> TAGTGGATCTGGTGCTAATGTTTTATTCAATCGTCACATGCTTCTCTAAGTATTGAAAAAGTTCAATGTCATTTGA<br/> GGAATAATAATAAATCATTTCATACAAAAAGCACTCTGATTTGAATAACTTGCTTGAAGATACACATGCCTCTTCT<br/> CATAAGAATGCCATTTCTCAACCAGAAAATGAGGAAACATCTCTCCCTGAAAACGAGATAAACCTTAATGAAGTT<br/> CAAAATCATTCAAATGTAGCAATACCACAAAGCAATCAACAACCTATGAAGCCGATGGAAACAGGACAATCAAC<br/> TTATGTACCAACAATGGGTAATTTACAACCTTTTCGACAGTATAATTTACAAAATAATTGCAATCATGAAAATCGTAA<br/> ACGTGGACAAGATTCCCTTGGATCACCTCAAAAAGGAAAGACTATAA</p> |
| 179 | yes |                                                                                                                                                                                                                        | <p>ATGTCAAGAGCCTTGAACCTGTTATTGAAGAAGAAGGAGTTCAAATGTTTAGAATGTCAAGAGGTAGTCCAAA<br/> GATTAATCATCTGGCATTTCAGATGATGTGATCATACTATGCAAAGCAGAACTTGGAAGTATGAACTTATTACG<br/> GGAGTATTGGAACAATATGAGAATATGTCAGGGGAGAAGATCAATAAAGAGAAAAATGGGGGAAAGGAAGACA<br/> CTGGACAAGATGGGCAAACCTTATGTCTACCAGTTGAAGAAGGAGGATTGGGTTTCCGAATGCTACATGATGATC<br/> TATGGCACTATTCTGTAAACTGTGGTGGAACTTTAGGACTCAAGAGTCTATGTGAAGTGAATTCATGA</p>                                                                                                                                                                                                                                                                                                                                                                                                                                                                                                                                                                                                                                                                                                                                                |
| 180 | yes | <p>GO:0003676;<br/> nucleic acid<br/> binding;<br/> Molecular<br/> Function;GO:000<br/> 3677; DNA<br/> binding;<br/> Molecular<br/> Function;GO:001<br/> 5074; DNA<br/> integration;<br/> Biological<br/> Process;</p> | <p>ATGGCCCCTTTTATGAGGAAGGCACAAGCTTTTGGTGTGTTAGAGAAGGTCTATATCTTTTGCAACAGGACAATC<br/> CCCAGTCTAATAAGGGCACTAAGTCTAGTGCAATGTATGTTAATGATATTCCTAGTGTAACCTTTGGAATTGTAGA<br/> CTGGGACATCTTCCTTTTTTTCAGTAACAAAAACCTTCAGTTTCATTGATTTCCCTTCAAATTTCTGAATATGTTTGTGA<br/> TGTGTGTCTCAAGCTAAGCAGACTAGACTCTCCTTTGGTATTAGCACTATCAAATGTAAAGTAATTTTTGATGTGA<br/> TACATATTGATACATGGGATCCATAACAAGACTCATACTCACAATGGTTACAAGTTACAAGTATTTCTTACTATGTA<br/> GATGATTTTAGTAGAGGTACTTGGACATTTGTTTTGACTACTAAAATCAATGCTTTCTCTGTTCTTATAGCTTTTCTG<br/> TCTATGGTGGAAAGGGTCAAAGAAATAGATCAGATAATGCATTTAAACTGGGAAAAGGAAGTCAGGAAGCAGC<br/> TTTTCTTACAAGCAGAAGGTATCATCTACCAAACATCATGTGTTGTTACCCCTCAACAAAATGGAATTGTTGAGAGG<br/> AACCATAGACATTTGCTGGAGATTGCAAGAGGTTTTATGTTTCATTCCAAAGTTCTATCATCAATTGGGGCGACT<br/> GCATTTTAACTGCCACACATCTGATCAATTTGATTCCTTCCAAGGCTCTAAAGGCTCAACATAGGGGAAAGTTTGA<br/> CCATAGAGCTACAGCTTGTGTGTTTCTTGGATATCCACAAAATCAAAAAGGTTACAAGATTTTGGACTGA</p>                                                                                                                                                                                                                      |

|     |     |                                                                                                                                                                                                                                                                                                                                                                                                                                                                                                                                                                                                                                                                                                                     |
|-----|-----|---------------------------------------------------------------------------------------------------------------------------------------------------------------------------------------------------------------------------------------------------------------------------------------------------------------------------------------------------------------------------------------------------------------------------------------------------------------------------------------------------------------------------------------------------------------------------------------------------------------------------------------------------------------------------------------------------------------------|
| 181 | yes | ATGAACTATGTAGGTATTCCTAAGAACTTTTAAATGGGGATTATCAATTACTATTTGAGTTAGTCAACAAAGTGCT<br>CCTTCCAAGATATGAGAAAAGAATAGTTGATTCTGCGGCTACTATGTTTCTGATGGAGGCACTTAGCAAGTTCGAT<br>CTCTTGAATCTTCCAGTCTTTATTTTAGAACACGTGCACAAGATAGTAGTAAAGCAAAAGGGAAAAGTTGGGATG<br>GCGTATCGCTACTTCCACCAAAGTATTCAAACATTTGGAGATTTCTCTTAGAGCAGGTACTGTAGGAACAATGA<br>AGCAACCCTTCTCCATGTACACTCTGGTTGAGTGTGAGTGTATGGAAGGCCGACCAGGGCAACTGAGCAAAAAG<br>TCTCAATTGGTAGTTGAGAAGAGACAATTAAGCATGAGCTAGAGGAGATGACTGCCCTGGTGACCAAAGAGAA<br>TGCAGAGATAGCCTTACTAAAGGCGCAGTTGGCAAAGGAACAAACAGAGGCATCTGGTTCAGCCGAAGTCACA<br>AAATTGAGGGCTAAGTCTGAATCTCTATTGGCCCAAAATGCTGAACTTACAGAAAAGTTGATCAAAGCACATGAT<br>GCTGCCAATGATCATCTTACTCTTGTTCATCCAATCCCTTACTCAAAGCCTCCCTTCTCCTAG |
| 182 | yes | ATGAGAACCTTAAAATGGGATCCAATGTTTAAATCCAGAGGAGGAGACGTCAACATCGATCGCATGGATATCATTCC<br>CAGCGCTTCCCAAAGTCTTTTGGGAAGGAAGCAGTTTTCTCACTAGCTGCAGCAGTTGGAAAGCCCTACAA<br>GTGGACATGGCGACAAAAACCAAACAAGGCTGAGTTGTGCGCGAGTTAAGGTAGAGGTGGATTTATTGAAGG<br>AATTTCCAAGCGTATCAAATTTGGGATGAGGAAACAGAATGAAGAGGTAGCAGAGAAGTGGATTAAAATCAAA<br>TATGACTATGTTCCAAAGTACTGTCAAAGTGTATGATTCAGGGGCACAATGCATAA                                                                                                                                                                                                                                                                                                                                       |
| 183 | NO  | ATGTTGTATATAGACCAATTTGATGCTATGAACCATAATCAAGTACGAGCATTGCATTGCATTATCATATGAGCACT<br>CAGATGAAGCGAGATGTTACTAATGGAACAACATGGAAATGGGCTGAGAATTATGCACCTCCAGATGAGCATGCC<br>GATGGTCCACCAATAAATCTTCTGCAGGTGGTGGTGGTGGTTCGTGCTCGAGGTTGTACTCACATGTCGTAA                                                                                                                                                                                                                                                                                                                                                                                                                                                                            |

184      yes      GO:0005524;      ATGGCCAGAGAATCTTGCATTGATGTGAGAAGAACCATCAGTTGCTGTGTGGAGACAGGACATTTAGACAATTCA  
 ATP binding;      ACCAAGGATCAATTGGAATATGCTAGTAGTCAACTAGTTCCTTTACTTCCGTTTTCTACGTGTTCTGGAGAAGGATA  
 Molecular      ACTTTGAGAATGTGATATCTAAAAATCTTAGGCCCTATTTCAGAGAAGCTGACCATGGCTTTTTCTGAGATACATTC  
 Function;GO:000      TCACATGAAGGATCAAGGCCTGACGAGTGATACTAGCAGAATGATTTTCAGAGGCGTTAAAAATAATTGAACTCGG  
 6915; apoptosis;      AAACATTGCTGAGCAAATCAAAGCTTCAAAGCCATTTCATACCCTATCCCAATCACTGTGGATATGGTGAAGCAC  
 Biological      ACAGTAGCGTGCCTTGATGGTGCTTTTCAACTGGCAAACATCGTAAATGTTGATCCAATTCCACAGGAAAAGCTG  
 Process;      GAAAACCTGGAAAATCTAGGATGCTTTCTCATGGTTACTGCAAAGTGGTGCATTGAACATGAGAAAATGAAGGAT  
                          CTCTTCAACATCGCTGAGGACGTAGCTTATACTGCCACCTGCACAGCTATCCCATTTTCATACGAGTGCTAAGAAAT  
                          CTCAACATCGGGAATGCTTTCTTAAGTTTTTCAGAATTGCTGGAAAGGATAAACCCCTATTATTAAGCCTGAGTTTAG  
                          GCACCTTTATATCAGTGTCTTGAAAGCATCATATTCATCCAGATCAAAAATTTCAATGACAGGTGATAGTCTTCGGT  
                          ATCTATCCGATGATGTGCTTGTGACATGGAAGTTTACTCATTTTGTGAGAAACAATCTGGAAACGCTACGACGTCA  
                          TAAAGCCATCTTAACTCATGTTGCCTTTTCTAGTCGATTTCAATGGCTCCTTCTTGGACAACATAAGCTTTGTCAAT  
                          TTCTCTCACTTGAAAGACAAAAGATTTCAGTATGAAGAATTACTTTCTTTTTTACTATCTTATATGGAACCTCTA  
                          GCCATTGAGGCAGCAAGTCAAATCTACTCCTTGTATGATGTGGATTTGGAGAAAAATATTGAAATAGACAGTATGC  
                          TTCTTCCCTTGC GGATGAAGTTTAATCATTTCAAATTAGAGAAAATTTCTTTTTGAGAAACTATCAAAAACCATGAT  
                          AGATCTTCCGTATCTACTGACATTTTAGAACTTTTCTCATGGATACATTGGAGCAGTGCAAAGATCAAGCTCAG  
                          CTAAGTATGTTTTGACCCTAATTCAATCTGCGACTACTGTAACAAGGGAACCTTGTCGATTCTCTTTCTGGACAAT  
                          TGTTATGGGAAACTAATCTCGTGCAGCATCACTTGCATATAAAGTATAAATTTTATAGGACAGCAATTAGACAGATA  
                          TGTCCCGTCTTTTCATCATCAACACCAGAGCATCCTACAATAAATCTTCTGAACTTTCTTCTGTTAACTTTGAGGA  
                          CATTGATTTATTTAAACCATTCTGAGATTCCAGCAACATCATCCCTCCCTAATAACCTGGATTTTAAACGAGTATTT  
                          CATGGGGTTGCAGGGATATATTCTCGAAAAGCTACTACTCAACGATGAAGGCAATCTAAAACCTACTAATACAGAT  
                          ATGGTCAAAGGCTACACAACGGGTTGTTGGTCCTGGTAACATTTCTTCTTGATCCCACTACTGAGTACATCGAAT  
                          ACAAGAACCAAAATGATCTCTCGACAGAAATTGGAACCATAGTACTTGAGGCCGAAGCTGCTATCCGTTTATCTA  
                          ACGAGGATGGTTTTGATAGCAGCAAAAAGTATGAAGCTCAATCTTGTGCTTCAGCATTTGACTATTGCTTTTCAGTCT  
                          AATCAAGTCCGAGGGAAACTTCATGGATCTACTAAAGCACAAATACACTTTGGAAAGTCAAATTCAGGATCTGAT  
                          AGAAAATGCTCACGAAGAGCTTATGTTCTTTAGAGCCTTTCTTATAGATCTTCTTAGGCAACAAAAAGAGCTTCA  
                          GAAATTGGATGATCTCATAAAGCATGCTGAAGTTGCTGCCCCGAAGGCAGCATTAAATTAGCCGTTGTAGCTATGGA  
                          AGTTTCATGGATGGAAGCAGCTCCGGGAAAATATCTGATTTCTGGAGGAGATCGAGTCTGTCAAGGTAGTGGTC  
                          AGAGAAAATAGCTTTGAAATCTTGATGCTTCACCTTGCAATATGGCATTAAATAGATGTTGAAGGCCTTATCAACTT  
                          TTTATTAGACCTCCTGGACAGAATGCTTGACTGTGATGTTGTTTCAGTCTCTTGTGTTGAAGAACGGAATCCCAGTA  
                          ATCAAAGAGAGACTAGTGTACTGGGGATCTTTTCTTGCAGATATTGTACAGTACCGCAACATGCATCAAGAACTC  
                          CAACACCTTGTCAAACGTGTTTCAGGATGTTGCTAATGGTACAAGGTACGTCTTTAACTTCTCTTTCAAGGGCTATG  
                          TACCTGCTTGGTTTAAACATGCTATGTCTCTCCGATGTCAAGCAATTGCTCAAGTATGTCGAGGAAGAGATCAAAAT  
                          GATTTGTTTTGAAGTTCCCGATTTGTCAAGTTATACCTTCCCCAAGACAAATGGATTAGGATTTATTGAAATTTTTT

|     |     |                                                                                                                                           |                                                                                                                                                                                                                                                                                                                                                                                                                                                                                                                                                                                                                                                                                                                                                                                                                          |
|-----|-----|-------------------------------------------------------------------------------------------------------------------------------------------|--------------------------------------------------------------------------------------------------------------------------------------------------------------------------------------------------------------------------------------------------------------------------------------------------------------------------------------------------------------------------------------------------------------------------------------------------------------------------------------------------------------------------------------------------------------------------------------------------------------------------------------------------------------------------------------------------------------------------------------------------------------------------------------------------------------------------|
| 185 | NO  |                                                                                                                                           | <p>ATGGCTAGACCAAAGTTTCAGGAAAGGGTCCACTGCCCCGAAAAAGAGAAAAATGGGAGGTTATTGTTGCGA<br/> AGGCTGCACCTCCTGGACCTTCAAGGCCTCGACCTACTCAAACAAGTACTCGTGGAAATGGAAAAACAACAGCG<br/> GAGCCCAGATCAAGCAGTTCTAGTTATGACAGCATGGGAGTATATTCCACCTACCTACCCACATCTAGTTCAGAGA<br/> GTGAGAATGATGCAGGTTCTAAGACTCCCATTTGTCATTCAGTGCCAGCAAACGACCATACTGAAAGGAAGA<br/> CGTGCTGAGTTTCACTCCGAAGAATTTCATTATCCAGCACGCCTTCTGGCTCATCCAACACCTCCAGCAGAGGCA<br/> GAAGAATAG</p>                                                                                                                                                                                                                                                                                                                                                                                          |
| 186 | NO  |                                                                                                                                           | <p>ATGATGCAGCAGGTTCCAAAACCTTCAAAAAGGTAGAGCTAGAATTCATTCTAGTGGGAAAGTAGTTGGTGACCC<br/> GGGCCGCTGGAATGTTGTTAAAGATAAAATGTGCATTGGCAGTAGTAATGAGCAACCCTTACCTACTTTGACAAA<br/> CAAATTTCAAGATTTAGCAAACGAGGAATACATGCAGCATGAACAACACAAAGGTGATGAAGATGATAGGGATAT<br/> AGAGAGAAATGAGAAGCAGAAACAAAATCTAATTGATGAGACAAAAATGGCTCTTGTGGTAGTAGATCAAGCAG<br/> CTACATCAGACCCCAAAAAAAAAAATTC AACCTGCACAACAACATGCAGTAGAGATCGATACTGATGATTCCAAGG<br/> AGGAAAAATCCACAAATTTATCAATTTTCAAAGAGGAGAAAATTTTTAAAGATGCAGATCTCTCTCCTAGGGTGA<br/> TGAAAGTAGTAAAGACTACTAGAAATGGCAAGAAACAAGGTGTCTCTGCTGATGATAATGCAGTTTTAGGAGTAA<br/> TTCCAGTTTTCAGGTTAAATGGAGACAGCGTTATGGTCCTGATGGGTTGTGCGGTAGATTTTTTCAAGAATGTCT<br/> GGATATAGTAAAGTCTGACATTATCAGAAAGGTAAAAGACTTCTTTGCTGGTAACTCTCCCAAATCCATTGCT<br/> CACACCAATTTAGTTCTCATACCGGAAAAGAGAATGTTGAAACTTTCTCCAATATGA</p> |
| 187 | NO  |                                                                                                                                           | <p>ATGTCTGGAATCAGAGAGCGGGAAAAGAGGTTGCGTCTAGAGGTCGTAAGAGGGTGAGGACTGGAACCACCA<br/> TCCCTCAGGCACATGCAATCCCAGGAGGTACACCCCGCGCTATGGTAGCAAGGCAGTTACCCTTGAGGGCAA<br/> AAGTTGTACAAAACACACAGCGAAGTAATTTATTTTTCGGATGTGGTGATTGAAGATGTGCACCTGGAGAGGGAT<br/> TTCCCTCAAATCATACTACCTTCAAGAGTTCAATTTGGGATTCATCTTCCAAGATCCTATGGAGTTCAATGTGA<br/> GTGTGGTTTCGGGAATTCTACCCAAACAGACCCCGCATGCTCAGTCTCATTTTGTATAGTGCGTGACGTGGAGG<br/> TTCCCTCACACCCTTGGCCATAAATAAATTTATTCGGTATTATGGAGGATCCTTCGGCCGTTCTAACTTGGTTAAAC<br/> ATCAGCATATCAACAAATTTGCCATACCTTGTGTGGAGTACAAAACCACCGCTAA</p>                                                                                                                                                                                                                                                           |
| 188 | yes | GO:0003676;<br>nucleic acid<br>binding;<br>Molecular<br>Function;GO:000<br>4523;<br>ribonuclease H<br>activity;<br>Molecular<br>Function; | <p>ATGGGAATTCAGAGAGCAATTCAGCCATGATAATGTGGGCTCTGTGGAAGAGGAGGAATACATTCAAGCATGGA<br/> GGAAGTTGGAGTTTTAATCAGATGAAGGAACACATAAGCATAACAGATACATCAATTGATTCAAGTTAAATACCCTT<br/> GGATAAAAAGAATTCCTAGAGATTGGGAAAATATAATCAGGGAGGAAACAGGGAATCTGATATATGCACAAGGAG<br/> ATGATATTGGTATAGGAACTAATATGGAAGAAGAAATCATTGCAATGTTGGAGGCACTAAGATACTGTAAGAGTGT<br/> TGGATTAGAGGACATTTGGCTGGAGTCTGACTCACTCAGTCTTGTAAATATCTAACAACTCTTGGAAAGTTCC<br/> AGGGAATAGAATAGAGCAGGTGGAAGAATGTAGAAGCTTAATGGTGATCACAAAAGCAAAGATTCAGCATACT<br/> TGAGGGAGGGGAACAAATTAGCAGATTCCATAGCAAACACAGTAATAGGATCAGAGGGAGTGGTTCAATTCGAC<br/> ACATTTCTAAATCTACCTACTAAAGGAAAGTGCATTATCAATTCGGACAAGGCGCAAATACCGACATTGAGAATC<br/> CGAACCAGGCCAATCAAGAATCAGTTAACACAGCATATAGAGGGATAG</p>                                                                                             |
| 189 | NO  |                                                                                                                                           | <p>ATGTCGAATCCAATATATAGGGTAAGCGCGGGTCCAAAAGCACCATTGGCTATTGTGCCAAATCTACCAGCCGAGT<br/> CAGCACCAAATGAGGATGGAGATAGAGATACCACAGATGGTACAACCCAAGAAATCTTGGGAGTTAGGCCTACA<br/> GCAGTACCTGACTTTTTATCCGTAGGTACAGTTGTACGATGCCCATGGAATTCTAG</p>                                                                                                                                                                                                                                                                                                                                                                                                                                                                                                                                                                                        |

190 NO ATGCAACATTTGCAACTTATATACCAATTGAACAACCTTCGTCAACTACTCACTACAACAAATGCTGGGCATCCAAG  
GGGCAGACCTTCCCAACGAGAACAACCGGTGAGCGAAGAGGACGACCATATGGAGGATCAGGTGGTACCACA  
AATGTACACGAGGGGGCCATCACCGCCTATACACCATGCAACGACCATAGAAATGAGAGAAGATGCACTAAACAT  
CCCAGAGCTACACTTGCAAACCTCTACTTGGAGAACTACTTGACAATAGACATGCAACAAAACATAGAAAGGA  
AAATCATGATCAAAGTTCCCAAAGAATTTCCAAAAAATCTCTAAACATACGATGCTAA

191 yes ATGAATGAACCAACAACAAGAAGTCAATCTGGGGTAATTTTGACATAGGCAAGGTGGTCAATGCTGGATTTAAA  
CTGGAGTATGTTGCTCCAACAAATCAAGGGCAGAATGAGGTTATTCAAGCTGGAATCTACCACTTCTATAGTAAG  
CCATTCATAGTAAAGGCTTGGCATGCTGATATGGATTTTTCACTAGAAGAAGTGCACACAGTGCCTATTTGGATCA  
AGCTTCCTGGTCTGGACTTTAAGTATTGGAGTCCCAAAGGATTGAGTAAGCTAGGAAGTTAATTGGGAAACCTC  
TAATGGTGGATCAAATACTGAGAGGAAAATTGGATTGAATTTTGCTAGACTTATGGTGGAGGTCGACATGAATG  
CTGCACTTCCAGATATAATTAATTTTAGGAATGAAAATGGGCAATTGATAGAACAAAAGTGACATATGAACAAA  
AAGTTTCATTAATTTTCATGGGACAGAGTATGTTTTCCAAAAGTGTAG

192 NO ATGTCCTTATCTTTAAATGTGCTCATGCAGAATAAAGATTTTAAAGGTTTGAGATGCCAAGAGGGAGCCTAAAGA  
TCAATCATATGTCATTTGCGGATGTTATGATCATAATGTGCAAAGTGGAGGTTGGTACGATGAAAATGACCAACGA  
CACTTTAAGGAAGTACGAGAAGATATCAGCGTAG

193 NO ATGTATCATTCAAGGTTGAAGGAACTATGGGACGAATATGATATGATTGTACCAGTGCCGAGTTGTGGTTGTGATA  
AATCGAAGGATTATGTGGAACATCTTCAGGAGCAGTTGCAATTTCTAGCTTGTTTGAATTATTCCTATGATCACACC  
AAAAGGCAGATACTACTTAAAATTGTTGCTCCTTCAGTGAATCATGCATACGCGATGATAATTGAGGTAGAAAGTG  
ATCAATCCATAGGTAATAATTCTACAAATCAGAATCAGTCAGATCCTTTAGTAATGAGCTTTGGTAGGGGAAGAGG  
CCATGCTTATCAGGGAACCACTGATAGAGGACAACCCTATCAAGGTAAGTACTGTTGGGAGAGGATAA

194 yes ATGAATGCTCCTCTTACTGATCCTAGTGTGTATAAGAGGCTTGTGGCAAACCTCAATTTTTTACAACACACTCGTC  
CAGACATTGCCTTTTAGTTCAACACCTAAGTCAGTTTCTACAAAAACCCCAAGTGCCCATATGATGGTTGCTCT  
CCATGTGCTCCGCTACCTTTTGAATGCTCCTGCTCAGGGTATTTTGTCCCAACACACCTGACATGTCTCTTGT  
GCTTTTTCTGATTCTGACTGGGATTCATGTGCTATTACTCGCAAATCTGTTACGGCTGAATATCGGGCTCTTAGAAA  
GGTTGTTGCTGAGGTCTCTTGGTTGATCAGATTGCTTGGTGACCTAGGTTTATCCATTTCTGCTCCTGTTCCCATTT  
TTTGTGATAGCCAGGCTGCTTTTCATATTGCTAAGAACCCCATATTTTCATGAGCGCACCAAACACATTGAAGTTGA  
TTGCCACTATGTTGCGTATTGTCTTAATTCGGATTTGATCTCATTGCATTTTGTACGCAGCTCTGCCAGCTTGCTG  
ATATTATGACCAAGACCCTTGCTGGTCTGCTTCATCGTGGAATTTTATGCAAGCTTGGAGTGTGTCCCCCTCCAG  
CTTGAGGGGGGGTGTAAACCGAGACTCCACCGACTAA

195 NO ATGGTTCCACCATTGGTCTTCAGAATGCCCGTCAATTTTAAATGGAGGTATGACAATGTGGATGCTATCAATAAGCTT  
TGCTCCTCCGATACAGGAGACACTTGTATGACGATTGCAAAAATTCATAAAAAGGAGTTGAGCAACAGAAGA  
ATGGGTTGAATTCGGGCTGA

|     |     |                                                           |                                                                                                                                                                                                                                                                                                                                                                                                                                                                                                                                                                                                                                                                                                                                                                                                                                                                                                                                                                                                                                                                                                                                                                                                                                                                                                                                                                                                                                                                                                                                                                                                                                                                                                                                                                                                                                                                                                                                                                                                                                                                                                                                                                                                                                                                                                                                                                                                                                                                                                                                                                                                                                                                                                                                                                                     |
|-----|-----|-----------------------------------------------------------|-------------------------------------------------------------------------------------------------------------------------------------------------------------------------------------------------------------------------------------------------------------------------------------------------------------------------------------------------------------------------------------------------------------------------------------------------------------------------------------------------------------------------------------------------------------------------------------------------------------------------------------------------------------------------------------------------------------------------------------------------------------------------------------------------------------------------------------------------------------------------------------------------------------------------------------------------------------------------------------------------------------------------------------------------------------------------------------------------------------------------------------------------------------------------------------------------------------------------------------------------------------------------------------------------------------------------------------------------------------------------------------------------------------------------------------------------------------------------------------------------------------------------------------------------------------------------------------------------------------------------------------------------------------------------------------------------------------------------------------------------------------------------------------------------------------------------------------------------------------------------------------------------------------------------------------------------------------------------------------------------------------------------------------------------------------------------------------------------------------------------------------------------------------------------------------------------------------------------------------------------------------------------------------------------------------------------------------------------------------------------------------------------------------------------------------------------------------------------------------------------------------------------------------------------------------------------------------------------------------------------------------------------------------------------------------------------------------------------------------------------------------------------------------|
| 196 | yes | GO:0005515;<br>protein binding;<br>Molecular<br>Function; | ATGGCACCAGCATCTTTCCGTAATAATATGCTTCAAATTTGGAACAGTTATATAGTAAGTTAAAATCTGAAGGTA<br>AGAAAAGGATCATCCTCACTGGGAAAGACGTCGAAATCGAGGACTTAACATGGATTGCAAAAAAGTCAAGTGGT<br>CGTGCTATTGTAGAAGGAATATTTGATTTACAATATTGTGGGAAGTGTCTTTCCAAATGGTGATATTGATGAAAG<br>ACTAGCTTGTAACCTGTGATGTTTATCTCCTCTCGATGAGTGGGAGCTTGAAAATAACAAGAAGGATATAATAAAG<br>GAGGAAAAAGAGACGAGGAAGGAAAAGTTATTGGAGGATCAGATGATAAAAAACTTGAAAGCAAGAAGGTTG<br>TCTTGATATTTGTTGATGGAGCAGGTGAAATGGATGAGCTGAGCATGAATAAGGTGTCTCGTCGCATAAAAGGATT<br>AAAAGCTAATCATGTACAAGAAATTCCTGTTACCACAGCACATGACAATGCTGAAAACCAAGGTCTTGAGGGAG<br>TTATCAAAGTGGAACATAATAAGGACCAAATCAATGGCAATGAGTCACTTTCTTCATGTTGTGAACCTATTGGAAA<br>GACAATCCATACAACTCCAGGGTTACAGTCTAAGTTGCTGCTGGAAAGCATCTTAATTGACTTATGTTGCCGCGAA<br>AACAAGTTCCCTTTAAGAGTGGAAGGGCACATTACAGTGAGTTGATCACTTATTGGATACTGGAAGGCTTTCTT<br>GGTCTTTCAATTGTTTTGAGAATGCTTATGAAAAGGGACACCGTGTCTTATGGCGCTTGCTCATCATGGCTTCA<br>TTGAAAAGCTAGCTGCAGGGTATGTTAGGAAAAATAGGAAACCGTGTGTTTTGAGTGCTTGTGATCGTTGTAGAA<br>TGGAGGAGACTGTCCGTCTAGGTCTGGCGAATGTTTTGAAGGTGATCTTGGACGAATCGACAAGCAGATGGG<br>ATCATAAGAACAACCTGGTAAGGTTGTAAGAGAGAAAAAAGCATCAACATTGTTGATTGATAGGAACCTTTCTCAAT<br>GGGGAAGTCTTAGTTGATCTCTTTCAAACCATGGAGGAGATAGAAGCTCTTGCAATCTTCAACCCAACATCCAAA<br>CCCGAGCCATTATCCTTGGAGATGCAGAATCTTAGGCTTCTTGTTCTTAGAGGTTGTAATTTTTAGGGGGCATTG<br>AGAATCTCTTGGAACATAAGACCAACTAAAGCTGACAACATTTCAATCCAGAACTTACTGTTCTTGAAATATCTGG<br>TCCTAGCCCTTCGTTAACAATCCCTGACAATCTTTTTAAACATATGCCTCATATCAAAGTCTTAATTTATCATCTCT<br>TCAAGTTTCTTCACTCCCTCATCCCTTTGTCTACTGAACTAGTTTGGCTCATTCTGAGAGACTGCTCCAGC<br>CTAAAGGAAATAGGAAGTTTAAAAAGCATGACAAGACTTCAGGTTCTCGATCTTTCTGGTTCTACATCTCTAGAG<br>AAGTTCCCTTGACAAGAGCTTTGCAATAAATAAGGAGCTTCGAATGCTTAATCTTTCAAACACCAAAAATAAATG<br>TTACCTTTGATCAAAGACTTGAGAAATCTCACTTATCTCTTGTACGTGATTGTAATCACTAAGAAGGTTACGCA<br>TGCTTGGTTCACTAAGCAGCCTGCAAATCTTGAATGTCAGGTGCCACAAATTTGTTGAATTTTATGATCAATC<br>CCTAGAACAACCTGGTTATCTCGAAGAAATAAATGTTTCACAACTCAAATGAGAAGCTTCCCTCAGATATCTGC<br>AACATACGTCGTCTTTCTTTGAGAGGGTGCTCCATGTTCAAAGGATTTCCACACTTTAAAAACCCCGATGCCCTTC<br>AATTTCTTGACCTTTCAGCCACAAACCTCATTAGTGTGCCATCCATTTCCAATCTTAGTAATCTTAGAGAAGTCTT<br>CTTTCATGCTGCTGCTCCTTGGTGAAATTTGGGAGACTTAAGTTCAATAAAAGATTTGCTGGTGCTTATCTTTAG<br>GTTGTAAGGCTCTAACTAGATTGGCGGATAACTCATTTGAAAACATGCATTGCCTTCAAATCTGAACCTCTCTGA<br>GACAAGCATTGAGTATCTGCCATCCCTGTCACATTTGAGTAACCTCCGTTGCCTTTTTCTACAGAAGTGCCTAAA<br>TTGAAAAGATTTCCATCACTTGAATCCCTAACAAACCTGGAGGAGCTAAATCTTGCTGGTCTCAAGTGCCTAGGA<br>GAAGTTGATTTCTTGAAGAATATGGTGAATCTTACCTTCTTGATATTTCTGAAACTGGGGTAACACATTTGCCATC<br>CTTATCAAACCTCAAAAAGCTTAAGCATCTTTCTCTAAGAGGTTGTCAGCAGCTTCCGAATCTGGAAGGAGTCAC<br>AACACTTGAAGTTCTGGATATTTCTGGTTCTCGCATTGTAGACTTGCCCTCCTTCGAGGATTTTCAATCTTCGTC<br>GCCTTATCCTCAGAGATTGCCAAACATAAAAGAGTTCAAGGATCTGGAGATATCTGAAGTCTTGAAGGCGCCGA |
|-----|-----|-----------------------------------------------------------|-------------------------------------------------------------------------------------------------------------------------------------------------------------------------------------------------------------------------------------------------------------------------------------------------------------------------------------------------------------------------------------------------------------------------------------------------------------------------------------------------------------------------------------------------------------------------------------------------------------------------------------------------------------------------------------------------------------------------------------------------------------------------------------------------------------------------------------------------------------------------------------------------------------------------------------------------------------------------------------------------------------------------------------------------------------------------------------------------------------------------------------------------------------------------------------------------------------------------------------------------------------------------------------------------------------------------------------------------------------------------------------------------------------------------------------------------------------------------------------------------------------------------------------------------------------------------------------------------------------------------------------------------------------------------------------------------------------------------------------------------------------------------------------------------------------------------------------------------------------------------------------------------------------------------------------------------------------------------------------------------------------------------------------------------------------------------------------------------------------------------------------------------------------------------------------------------------------------------------------------------------------------------------------------------------------------------------------------------------------------------------------------------------------------------------------------------------------------------------------------------------------------------------------------------------------------------------------------------------------------------------------------------------------------------------------------------------------------------------------------------------------------------------------|

|     |     |                                                       |                                                                                                                                                                                                                                                                                                                                                                                                                                                                                                                                                                                                                                                                                                                                                                                                                                                                                                                                                                                                                                                                                                                                                                                                                                                                                                                                                                                                                                                                                                                                                                                                                                                                                                                                                                                                                                                                                      |
|-----|-----|-------------------------------------------------------|--------------------------------------------------------------------------------------------------------------------------------------------------------------------------------------------------------------------------------------------------------------------------------------------------------------------------------------------------------------------------------------------------------------------------------------------------------------------------------------------------------------------------------------------------------------------------------------------------------------------------------------------------------------------------------------------------------------------------------------------------------------------------------------------------------------------------------------------------------------------------------------------------------------------------------------------------------------------------------------------------------------------------------------------------------------------------------------------------------------------------------------------------------------------------------------------------------------------------------------------------------------------------------------------------------------------------------------------------------------------------------------------------------------------------------------------------------------------------------------------------------------------------------------------------------------------------------------------------------------------------------------------------------------------------------------------------------------------------------------------------------------------------------------------------------------------------------------------------------------------------------------|
| 197 | yes |                                                       | <p>ATGATCATCACTCAACGCAAATACACTTTGGAGCTTTTATCAGAATACGATTGTTCTCATCTCCCTCTTGCGTCATC<br/> TCCTCTTGACCCTACACAGAAATTAGGGGCTGATATAGGATATTTATTAATAGATCCTACTTACTATCGAGGGCTCG<br/> TAGCTTTTTGCGATGCTGATTGGGGTCTTGCATTGACTCTCGAAGATCTGTTAGTGGATTTGTTACTACCCTTGGT<br/> GGTTCTCCAATTTCTTGGAGATCAAAGAAACAAACCTCTATTTCCATCTCTTCAACAGAAGATGAGTATCGATCTA<br/> TGCGTCGGGTCATTGCTAAATTAACCTGGCTTAATCACTTTCTTGTGATTTGGGTTCTTCGTCGGACCTTCCAATT<br/> CCGGTTCATTAGATAGCTAA</p>                                                                                                                                                                                                                                                                                                                                                                                                                                                                                                                                                                                                                                                                                                                                                                                                                                                                                                                                                                                                                                                                                                                                                                                                                                                                                                                                                                                                                              |
| 198 | NO  | GO:0005525;<br>GTP binding;<br>Molecular<br>Function; | <p>ATGATTGTGGTCTTTACTGGAGGAGATGAGCTTGAAGAAAATGATGTGATTTTGGATGATTACTTGGACCACTGCC<br/> CTGTGCCTTTAAAGGAACTCTTGAAAAATGTGGCAATAGACTTGTACTTTTCGACAATAAGACTGAGGATCCAG<br/> TGAAGAAAGATGAACAATTGTGA</p>                                                                                                                                                                                                                                                                                                                                                                                                                                                                                                                                                                                                                                                                                                                                                                                                                                                                                                                                                                                                                                                                                                                                                                                                                                                                                                                                                                                                                                                                                                                                                                                                                                                                                     |
| 199 | NO  |                                                       | <p>ATGCCAAAGGGCGAAAGTATTGAGGGCCAGATCCAGTGGAACTGTACTTCGGGCTATTGGGAGGCTCAAGAA<br/> GGTGGCGAACCGATTTCTGATAGAGAACATGCCATTGGGGCAAAGGGACCAATATGGCATGTCATTGCGATTTTCAT<br/> TCAATCTCACAGTACTAGGCTTAATCCTAATATCCTCAGGGATAGTCACGGAGAAGCTTTCCCAATTCCTACCTTCA<br/> TGACTCCAGAAATTCCTCAATTCAGAATGCGTTCATTACAGTTCAACGGCCCTTGGATAAGAGATCTGAGAGAT<br/> GGAGCATGTGGAATCCATTTATGTGTCCATACGTCGATGATTTTACCCGTACCCACTGTCCAAGCTAG</p>                                                                                                                                                                                                                                                                                                                                                                                                                                                                                                                                                                                                                                                                                                                                                                                                                                                                                                                                                                                                                                                                                                                                                                                                                                                                                                                                                                                                                                                                      |
| 200 | NO  |                                                       | <p>ATGTCATATGCAGCCACTTTACAACCTACGATGACAACCTCGCGCTCATGTACCAATAAAACCCTTGTCTCTTCTGC<br/> ATGGGGAACCAAGGGTTATTTGGGAGGAAGAAGAGGTATCTCAGATGATTGTTAATGAAGATTTGGAATATGCAG<br/> TTGTTGGGAAATTCTCCTATGGATGGCCAGACATACATGAATTAAGGAAAATTTTCGAAACAGTGTGAATTA<br/> AGGAGACGTCAATATTGGTCTATTGTGTAATCGATACGTAATAAGGGCCTCAAGGATGGAGGATTATGTGAAT<br/> CTGCTCTCTAAACCTATATTCTACATTGCCATAGAAATTTGGTATTATCCAATGAGGACATTTAAATGGGATCCTTTC<br/> TTTGATCCATTGGAGGAAACGTCGATCGCAGTTGCATGGATCTCACTGCCAGCACTGCCTCCCAATTTATTTGGAA<br/> AAGAAACGATCTTTTCTATTGCTGCTGCAGTGGGTAAACCTTTACAAGTGGATACGGCTACTAGCAACAAGACTA<br/> GGCCTAGCTGTGCTAGAGTCAAGGTGGAAGTTGATCTAATGGGTGAATTTCCAAAGCGGGTTAATGTTGGTATTA<br/> AAAAGAAGTTTGGGGAATAGCTGCTAAGTGGGTCACCATAAGGTATGATTATCTGCCCAAGTACTGCAAAAATT<br/> GTAAATTGCAGGGTCATAATGAGAATGAGTGTCTTTGTTTTGCATCCTGAACTATAACCCTAAAGAGGAAGACGTGA<br/> GTGAAAAGGAAGCCACTGCAAAAAGAAGAGATGAAGAAAGATAGGGGCCAGGTGAATGATGAAAAAGGGGTAG<br/> AGGACACAGGGAAAGGGAAAGGAAAAATGGCATCAGGAGAATAAAACAAAGAACGAAAATAGAAGAGGGTATC<br/> AAAACAAAGGGGGATTGACTCAGAGATGGAATCATAAGGAGAAAGCGAATGAGGAACTAATGTTATTATAGGC<br/> AACAAATTTGATGCATTAACCGAAGAAAAAGGGAAAGATGAATCAAAGCAACAACAAAATGAAAGGGATACAA<br/> CATCAATGAATAGTGCAGGGAAAGAAGTAATGAGTAAAGGGCCTGGTAAAACAAAGAAATGGGTAGAAGAGATT<br/> TTTGGGGCACAGAGAGAAGAGGGGGAATTGCCTGTCAAAGCAACAAAATAGAGGGAGCCACAACAGAAAGA<br/> GAAGACTCTGTAAGAGTCTACGCAGAAAAATGACAAAACAAGGGAGGCAAGTATAAGATAATTAGCAAGG<br/> ATACTGATACACAAGACAAAAATAATGTGGAGGAAGTCAAAGGGAAAGAAAGTGAAGCAGCAAGATGATAA<br/> ATCAGAACAATAAATGTGGAAGAGAAGCCATCAGACCCTCAAATGCAGATCACACTAATTTGGAGGGAGAGG<br/> GATCATCTATAAATAAGACAGACGAGAGTACCAATGAAGAACGAGAAGTCTTTCTTTGAGGCAAATGCAAGAA<br/> GAACCTGATAAAACATTTGAAAGCAGGGATGAAGAAGAGGATGAGAACATCATGGAGAATATTGTTGAAGTGTG<br/> AAAAGATGGTGACCTTTCACCAAGGCATATCAAGGAATTGAGAACGGGAATGAAGATCAATAAACTTGAAGGTA<br/> AAGTTAGAAGTACAAGAAGTAGTTCGGCAAGACCGCCTTTGTCTAAATGA</p> |



201 NO ATGGCTGAAATACATGCTAAGTTTGTCTTTAAAAAGACTGAACTTAAGCAGATTTTGCCTTCACTAACGCGGATAC  
CTTGCTTGCAAATGCGGAGCGAGTTCTGCAAACGTGGAAGTATTGGAAGCCACCCCTTACGAATACGGAATCCT  
CCCTACGAATGCGAAGGCAAGAGGGTCAACCCTACGAGAACGCCTTGAGGCATATGCAAACGCGGAGGTTTAAG  
ATTTTGAGCTCTCTGAACGCGATCAAAGATCTGCGTTCGCAAAGAAAGAACCAGTGTTGCACCAACAACAAC  
AAGGCAAGGAATTTCTCCGTTGGGAGTCCAAAACCTCGTTCGAAGACCTGTCAACGCAAACCATATATGCTACTTG  
GATTAAGATGACATTCAAGACGTAA

202 yes ATGCCGGACGAGACTCATGCTAGGAAGCTTACCCTCTCAGTAGGGTCTCACAATACCCCAAACCTCTAAAGTTGAT  
CAGAGGACAACGGCGGAAGTAGTGCGGGGCAACAACAATTTAAAATGCAGCTTCCACAAGAACTCTATATTGA  
AAAGCCTGATGGAACCTTGATCACTCAAGCGATAAAGTATGAGTGGACACCACAGTTTTGTCATACCTGTATGAA  
GATGGAAAATAAGGAAGGTGAATGTAAGCATGGCAAGCCAGCTCCACCAGTTATACATCTAGCAAGGAGAAGAA  
GACCTCCTCCACCTGTATGGCAAGCTAGGCCTGTAAGCACCAAGAGCACCCGGCAAAGGGGAAGGAAAAGGA  
GGACAATAATAAGGAGAATGTCAATGAAGAGAAATCCACTCCTTTCCAAATAGTCAATCCAAAGCTAGGGTATGG  
GGATATTGAGGCTGATTTGTAGACCCAGGACGTTCTGATCATAACCTATTGTAGTGAATACATGCACTGTTTCA  
TTCAGGTTAAAAGGCCATTTAGACCGTTAAATGTGGTGATGAAGCACCATAGCTTTAAGGACCTTGTGATCTCTAC  
TTGGAATCAACAGGTGAATGGATATGAGATGTTTATTATATGTACCAAGCTACAGAAAATAGCCCACCAGGCTCAA  
CACATTCAAAGAGAGTACTCCTCTGTTAATAACAAGAAAATGACCTTTAGCGAGAGGAAATTTGGTTGTGAAAAG  
TCCAAATTCGGTCGCTAA

203 NO ATGAACGTTAGCGACAATAATCCCAAAAAACATATGCTCCTGAAGTTCAAGAAGAAAATATCGTTCCAAAAAAT  
AGTAAGGTTATTGGAACATGCAAGAATTCACAAGTCATCGAGGACGTTACACCATATTTATTTACATCAGATGATAT  
TCAAGCTCCCGAGGAAAAAGATGTTTCCAATAAAGGTAGGTAA

204 NO ATGAACAAAGTTCAGAGAGACTTCATCTGGGGGACAACAGATGAGAAGAGGAAACTGCATCTCCTTAATTGGGA  
CACCATAACTAACAGGAAAATCATGGGAGGCCTAGGTATTCAGAAAAGTGAGATAAAAAATAGGGTTATTCTCTC  
AAGCCTAGTATGGAGGGTAGCCCAGAACCCAAATAGACTTTGGAGCAAGGTTTTAACGAGTAAATATTGTAATC  
AAATACGAGCTCCAACTCAATAATTGTCTCCAGAACATGGAAAAATATCCAAAATGGCTGGATAGACATAACCAA  
GGCAACCAAGTGGATAGTGCATAAAGGAAACAAAGTGAATTTCTTGAGTGACAACCTGGCTCCCGCACCATGACA  
CTCTGCGCAGCGTCATCCAAGGCTCAATGGCCTATGGAGAAGAAAACATAGAGGTCTCTAAAATCTACCATCAAG  
GGAATTGGGACTTCGATAAGATCTCCTTTGAACTACCTGGAAATATCAAGACCATAATCAAGAGCTATCTCTTCCC  
ACAAGAAAGCACTAAGGAGGACAAGTTGGTCTGGGGACTGAAAAGTAATGGACTATTCTCAACTAGCTCGGCCT  
ACAATCATATCAAAGAGGAAACCTCCAAGCACTTTTCGCAAGCCCAATGAGAAGTTGAAATGGATCTGGAATGCA  
AACGCACCAATAGAATCAAGACTTTCCCTATGGCTCTTGTAACCATCGTAGGCTCCCCACAAACCATTCCCTCCAGC  
AAAAAGAAATAAATGTTAATCCAAAATGTCCTACTGTGATTACCAAGGAAAGACTCTAACTACATCTTCTTTTA  
TTGCCAAAATCACTCAATTTATGGAACCTCAATCCAAGCGAGAAGTAGCAATCAAGGATCACCATCACTGACAT  
CATAAATGAGACTAACTGGATTGATGAATGGAACAAGCTGAGAGGGAAACAGTTCAACCAATGGTTAGATTGGA  
ATACTCTTATACCTTTCTGCCTATGGAATATTTGGATCACCGGGAATAACAATACTTTTAATGACCAAAAAGAATTCC  
ATTAGTAGCCATCAAACCATTTACAGATCAACGAGTACAGTTTACTCATTGGCAAGCAAGGCAATACAAAGGCA  
AGAAAGACAACCATGATAGTCAAAGAGGAAACCTCCTAACCCAGGATCATAAAGTTGAATGTGGATGCCTCTGT  
GAAACACATCCCTGGCCCATGGGGTATATGA

|     |     |                                                                                                           |                                                                                                                                                                                                                                                                                                                                                                                                                                                                                                                                                                                                                                                                                                                                                                                                                                                                                                                                                                                                                                                                                                                                                                                                                                                                                                                                                                                                                                                                                                                                                                                                                                                                                                                                                                                                                                                                                                                                                                          |
|-----|-----|-----------------------------------------------------------------------------------------------------------|--------------------------------------------------------------------------------------------------------------------------------------------------------------------------------------------------------------------------------------------------------------------------------------------------------------------------------------------------------------------------------------------------------------------------------------------------------------------------------------------------------------------------------------------------------------------------------------------------------------------------------------------------------------------------------------------------------------------------------------------------------------------------------------------------------------------------------------------------------------------------------------------------------------------------------------------------------------------------------------------------------------------------------------------------------------------------------------------------------------------------------------------------------------------------------------------------------------------------------------------------------------------------------------------------------------------------------------------------------------------------------------------------------------------------------------------------------------------------------------------------------------------------------------------------------------------------------------------------------------------------------------------------------------------------------------------------------------------------------------------------------------------------------------------------------------------------------------------------------------------------------------------------------------------------------------------------------------------------|
| 205 | yes | GO:0005524;<br>ATP binding;<br>Molecular<br>Function;GO:000<br>6915; apoptosis;<br>Biological<br>Process; | <p>ATGCATGTAACTCCGAAGTTCATGCTTACCAAATGATGCCATTGAGTTTATATGATAGTTGGAAGTTACTTCACAA<br/>GAAGTTATTTGGTGTAGAACAAAGTTGTCCTGCAGAATTGGAGGAAATAGGTAGGGAAATAGTTGGAAAATGCC<br/>AAGGACTGCCGCTAGCTATATTGGTGGTTGCAGGGCATCTCTCCAAAGTTCCCATGACAAAAGTAACCTGGGAAA<br/>TAGTAGCTAAAAATGTTAATAGAGTTGTTACAAGTGATCCGGAAGGACGCATAGGATTACTTGCTATGGGTTACCA<br/>GTACTTGCCTATTCACCTAAAACCCTGCTTCTCCATATCGGAACATTTCCCGAGGGTAATGAGATTGATGCTTGG<br/>ACATTGATCAGATTGTGGGTTGCTGAGGGATTCTAAAGAGTGACAAGTTGAGAAGTCCTGAAGAAGTGGCTGA<br/>GGAATGTTTGGAGGATCTTGTTCAGTAGAAATTTAGTAATGGTTACAAGGAAGAAGGTGGATGGTCAGATCAAAAAG<br/>TTGCAGTATGCACGAAGTGTACGGGATTTGAGTGTGAGAGAAGCTGAAAAGGAAAAGCTTTTGAATGTGATTA<br/>CAAATAATGAAGTTCCTAATTTTTTCAGCAGCAAATGAACAGAGTGCTCCGAACCTTTAGTTTGCATACCTCTATTTT<br/>CTTGGAAAAGTTTATGAAGTCCTCACAAAGTTGTACGTTTCTTGTACCTCTTCAAGGAACCAACAGGAAAAACTTC<br/>GGAATTCAAAGCTTTGAGAGTGTGACCATTCTAAGTCTTCTTTATCTTTCGCCATCACATGACATTAGGTTCA<br/>GCTATCCTGAGATACCTTGAAGTTACTAGTGACAATGATTTAACGGAATTACTCGGATATATGCACAACCTTCAAG<br/>CCTTTATATTTTACACCCGTAAAATATTAAGGTTCTACCTTTGCCAGAGAATTCTGGAATCTTAAGCAGTTGAGG<br/>CATCTCCATGTTATGCATAACATTCATTTACCAATCCTCAAGGCAATAACTCGTCTGATGTTGATATGCATCATCTA<br/>CAGGAGCTTTCCAATCTCTGTGTGCTAGTTGTACAAAGGAGGTACTATCTCGCCTTACGAATCTGAAGAAATTGA<br/>GGATCAATGATTTCAGAAGATACATCAAAGACAACGAGATAGAAACATCTTGGAGCTTACTCAATCTTGTCTGCTT<br/>AAATAAACTTGAATCCCTTTACCTATGTTTCAAGATGTGCTCACTGTCGTCACCCCTGGCAAATTTGTTGTTTCC<br/>CAACATCTCTTAAGAGGTTGACCATGTTTGTGATGGTACCTTCCCTGGGAAGACTTGGCAACTATTGCGAAGTTGC<br/>CCAATCTCGAAGTGCTCAAACCTCAGGAACAATTCATTCTATGGTGACATGTGGAAACTAAATGATGATGTTTCAGTT<br/>CAAGCAGCTAAAGTTTCTGCTACTTCATAACGTGTACATAAAACGGTGGGAGGCTTGCAGTGATAACTTTCCAAA<br/>TCTTCGCCTCCTAGTGTTACAGCTGATGTGTCACCTGGATAGAATCCCTCTGGAGTTTGCAGGATATATGCACCTTG<br/>GAGTCAATTGAGTTATATTTCTCCTTGAATCTCTTCAAATCAGCAAGAGAAATTGAAGAGGAAGTTAATTCAGTG<br/>GCGGGATACGATTTCTTTCATGTTGGCATCTACGATGATTATTATGAATTGGTTAAAAAACGCGGTGGAAAGGCTT<br/>TTGCTTCTTCAAGCAGGGTGA AAAAATTAGCCATAA</p> |
| 206 | yes |                                                                                                           | <p>ATGAACAAGACTCAACCAAGTTATGCAAGGGTGAAGGTTCAATTGGATCTACTAGTGGACAAACCTGAATTTGTT<br/>CAAATGCAGATAGGAAATAACAACAATCAGGAGAACAACCTTGGTAAAGTTAAAATCCAATATGACTCACTCCCA<br/>TCATATGGCAAGAGATGTAGAATTCAGGGTCATAAAGAGAAGGAACGCATGATACTTCATCCAGAACTATAA</p>                                                                                                                                                                                                                                                                                                                                                                                                                                                                                                                                                                                                                                                                                                                                                                                                                                                                                                                                                                                                                                                                                                                                                                                                                                                                                                                                                                                                                                                                                                                                                                                                                                                                                                                          |
| 207 | yes |                                                                                                           | <p>ATGAAAGTAAGAGATCAAAACAAGAAGCATGTTGGTACTTCTAAAGATCAGGAGATCACCGACAACAACATAGA<br/>AGTCGTACAACAGGAGAATCTGAACAAAAAGGGGACTAAGAAGGCTAAGGCAAGTATGAATCGAGCGACAACA<br/>AATAGCTTCTTGAAACAGATAATGTGGGCTAAGCAAAGATTGAAACAAACACCTGATGAGAAAAGTAAAACAGG<br/>CACAAGGAAAGACAACAAAAAGGAAAATAAGCAAAAAAAGATCTGAATCTTGTAACTGCAAAAAGAGACGGGA<br/>TATCAAAAACAAGGGAACATGACTACTTCAACAAAAGAGAATATTAATCAGAAGAGTCATAGCAACAATAACCA<br/>ACACCAGCAGGAAGATCAAATTAGCAAGGCTGGATGTAATATTGATAGAGGGGAAATGAAGTCACGCTCCACT<br/>GACAGTTGACCCCAATAACTGGGTTGTGGAACGAGGTCCAGCGGATGGTATTAAGCATCCAAATGAGCAGATTGA<br/>TAATCCAGATCAGAGCATCAACAATACTTTCAACAAAAGAAGAGGAAGCAGACTCTTCATATGAGGAGGAAGAAA<br/>ACAAAGAAGATTGGTCAAACCTCATCTGATGAGGAAGTGGCAGAAAGTCTGATTGAACTTTTGTCCAGAAAG<br/>CAAAAAGAAGTAGATCATGTTACAAAAGAACTTCTACGATGATAAGTCAACAAGGTTTATCTCCTAGGGCTAAT<br/>AAGTACAAACAGAAGAAGGTAAGGGAGGTCAATCTAGACTTCTAATAACTAG</p>                                                                                                                                                                                                                                                                                                                                                                                                                                                                                                                                                                                                                                                                                                                                                                                                                                                                                                                                                                                                                                                                                           |

208 NO ATGATAGGGAATCCACTGAAAGCAGATAGGGCAACAACACAGAAGGATAGGCTGTCGTTTACAAGAGTCTTGAT  
AGAAATACCTCTTAATAAGGAATATCCGAAAACAATAATGTTTGAGAATGAAATGGGGAAGATAGTGTACCAGGA  
GGTTGAGTATGAATGGAAACCAATATTGTGCACGAAATGTAAAAGTTTTGGGCATGATATCAGTGAATGTGAAG  
ACAATTAAGAAGAATGAGCAGAATCATAAAGAAGAACCAGTGAGGAATGGAGAAGGTAAGGAGAGAGCAGAT  
AAGGCTGAGGAATTAGAAGGTGATACAAAATCAGTAAGGATCCCAAGTAGAATAAAGATAAAAAGGGGGAAAA  
CTAAAACAGAGGTGACTGAGACGAATAACACATTAGTGTGATGGGAATGGAAGGGCAAGGAAGCATGGAGAC  
AAACAAAGGGACTAGTGAGATAGGGATTAAGAGAGCCAAAGAAGCAAGAGCGGCTCTTAATCTGTGTAGGGGG  
TGGTCATTTACAACCTAATTTAGCAGCTCACAATAGAGGGATATGGATTTTGTGGAAGCTAGAGGTCTATAATGTTG  
ATGTGAAGGTGGTAACAGGGCAAATAATTCACAGCAAAGTGGAGCATAGAGGAACAAGAAGGGAGAAAATTTGG  
CGACATTGAGAGGAAAGCTGAAGAGGGCAAGGAGGAACCTAAGGCAGTGTGAGTTGAAGTTGAGAAGGAATCC  
AACAAATAACAGCCTGATTGACCATGAATTGGAGATAACAAAAAATATGGGAAATTTAAGGAGGCTAGAGATCA  
GTTCTTGAAACAAAAGACAAAGATTAGTGGATAACAAGAAGGTGACCAGAATACGAAGTTCTATCACAACCTACA  
TAAAGGCAAGAAGGAATACAAATAGAGTATTTGCAATAAAAAGATAAATATGATGAACGACAGGAAAGGATGGAA  
GGAATCAGTAAAGCTTTTTTAGCGTATTACAAAGAGTTGATAGGGCAGTCAAATATGAAGAGGAAGCATGTATGC  
AGGGAGATACTCATGAATGGACCAATGGTGAACGAGGAACAATGTACACAGCTAAAAGCAATGTTACAGAAAA  
TTATGTGAAAGAAGCAATTTGGAGCATAGATGGGAACAAATCTCCAGGACCAGATGGCTATGTAAGTCAATTTTT  
TAAGGACAATTGGGAGATAGTAGTCAAAGATGTGGTGAAAGGAGTGATGGAGTTCTTTAGGACAAAGAAGATAC  
TTACGGGGATGAACAATACCACAATAACTTTGATACAAAAGGAAGTCATGCTGACACAGGAGGGGACTATTAA

209 yes ATGAGAATCTTGTTTGCTATTCAGACACAAGGATGCCAGCAAGTGGCAGATGAAGCTGAAAGGGAGTACAAAA  
GATGTCTGAGCGAATCACTGAAGGCAGGGAGGCAATGAAGGGTTCATATTCGACGTTTCATGGCAGAACTTCAAG  
CTAGTGGTGCTCGCTTGTGCAAACAAGCCATTCTGAGCTGTCACAATCCGTCGAGAAAGCAATAGATACTCTCA  
AGAACCGTTATGGGATCCATTAA

210 NO ATGGATTTCAAGCATTGTGCATATCTTATGATTGATGCCACGACTAGATATGAGACAATGTGTTTTATGGATGGTTC  
ATCTGGATACAATCAAATTTGTATTGCACCAAACAATGAAGAACTTACTGCATTTTCGTACTCCTAAAGGAATATATT  
GCTACAATGTAATGTCATTCCGGTTTAAAAAATGTTGGAGTTAAATCAAGAAAAAAGGATGACCATTTCAAAGATTT  
GAGAATGGTGTGTTGAACGACTTCGAATATACCATCTCAAATGAACCCTTTAAAACGTGCCTTTGGGGTTACTTCA  
GGGAAGTTTCTTGGTTTAATTGTTTCGACATCGAGGGATCGAAATTGACCAAGACAAAATAGATGTTATTTTGAAGA  
TGCCCGCGCTAAAAATATTCATGAGTTGAAAAGCTTGCAGGGAAAATGGCATACTTAGAAGGTTTATCTCTAA  
TCAAGATGCCAACCATTCAGTCATCTTATGA

- 211 NO ATGAATAGGCTAAAGAGGATGCTTAGCAAGTGGAGCAAGGAATCATATGGAGACATCTTTCAAAAAGTATCCACA  
CTTGAAGATGTGATTAAGGTAAAGGAAGTGCAGTTGGAAGTACATTGTTTCAGATGAAAACATGAGAGACTTAAA  
CAAGGCAGAAGAGGAGTTGCAGAAATTTTATCAACTGGAGGAGGATTTTTGAAAACAAAATCAGGTATGAAAT  
GGTTAATGATGGCGACAGGAACACGAAATTTTCATTCATATGTGAAAGGCAGAAGGAGGAGGCTGCTTATAA  
ATGAAATAGAGGATGAAAATAGAGCTATACTGAGGGAGGATAAAAAGCATAGGTGAGGAAGCTGTGAAAGTCTTT  
GAGGATCAATTTGCAGCTGGAGCAGTTAGTGACGATCAGGCCATGCTAAATTGCATCCCACACATAATTACAGAA  
GAACAAAAGAGAAGATGGATAGAACTCCGGAGGAAGAGGAAGTGAGGGATGCTATTTTTTTCATTAACAGTGA  
AAGCGCTAGTGGCCTAGATGGTTTTTCGGGCAAATTTCCAAGCTTGTTGGGAGATCATAAAGGAGGACATTGT  
AAAATTAGTGATTGCTTTGTTTTGTGGATGGGAACTACCAAGATATGTAATCATACAAATCTGGTTCTCATTCCAAA  
GAAGGAAAAAGTCACTAGTTTTAAGGACTTGA
- 212 NO ATGGGCATCGGCTCCACCCATCTCACCTCCCCTGGATCTGAGAGTGAGGAAGTTGTGGGGTCCAAGACTCCAGT  
GCACACACCGGCAACAGAGGGAAAGTTGCTAAAGCGAAGGCGCTCAGTACTACGTTCTAAAGAAGTTCATGATC  
CATTAGCCCAACTTCTAGCACCTCTAGCACCTCCAAGGCATCTAAAGTGCCCCCAGCCCCAGCACAAAC  
CTCCTAGATCAATGAATCGACTGAAAGATACTTTCTTACAACTATTCTGGAGGAGAAGTGGTTGTCCACGGATTG  
TGTGGTGGATATATATGCAATTTTGTGGGAGAGCCTGCATTTCCATCTACTCCAATAG
- 213 NO ATGTTACTAGATAGAAGTTATGACGTGTTCTACTTTGGGGTGAGGCTTAATAATCTTAGGACTAAGATGAGATCTTC  
CATGAGGATGGAAAATCCTTATTATCATATGGCTGAAAAGAGCGATGACGATTCTCAAGGCTTGGACCTTTCTTTA  
TGTGATGAGACGAGCCAATTCGTGTTCACTGTTGAATGGTTTGAAGCCGACCTAAGCCATGAAATCATCCCTTCTA  
CACACGAACTGAGGTGACATTAGATAGGGATTTGTTGATTTCTGCTAGAATGGATGGCATGGGGGTTGATGTTTG  
GAGATTGACTATTCACTTGATTTCTGTGTTGGCTAACGGGAGAGCCAAGAATAATGAGAATAAGCCGGCCAAAGA  
TATCCATCCTTTGAGGAAAGGGAAGTTGGGAGAGAGAAGCTTGATTCAGTATAGAAATGCTACCTTGAGACATTC  
TTCCTCCAATATCCGCAAGGTTAGGGAGATGATGTGAGCATTCTTCTGGATCATCTAAAGCCACCACTGCAGAG  
GGTGTTCCTCAACCTACTATTCTTCTATAGCTGTTGCACAAAGAGTGATGTACGACAGGCTTATGCACTTTAGTC  
AGAGGCAAGGAAGGATAAGAGTAGATGTGAATGACGTTCTGATAGCATTAGTGGATGAAGATAAAGTTCCTGAG  
CTAGATGATGGGAATCTTAA
- 214 yes ATGTTGCCAGTATATCAAGAGGAGAGTGAGCTGCTAGAGAATGTATTTGAGGAAGAAGAGGTACACGTAATTCGG  
TCATGTGCACCAAACAAGCACCTAGCCTTGATGGACTTACTATGGCATTCTTTCCGAAGTCATGGGACTTCATTA  
AACCAGAGGTAATGGGAGCCATCAACATTTCCACCAGCAGTGTTACATGGTCAAATCTTGCAATGTCTTCTCCAT  
TGCATGATTCCCAAAGGAAGGGGGTTGTTGAGCTTTGA
- 215 NO ATGGTAATTTTCATGATTCAGTTGGCACTTGGAGTTTTGAGAGTTTTCTCTACAGGAATCCTCTTGTTTTATAGGTC  
AAAGGTTGAGGAAGACCATCTAAACATCATTGATGAGTTTGGGAAGCAAAGGGTGAGGAGTTCATGAGTATCA  
AACAGGAAGAAACGAGTGTGAAAGAGTATAGCCTCAAGTTCATTAGCTATCTCGATATGCTCTCGGAGTGGTGT  
CGACCATGAGGGAAAGGATGAAGATTTTGTGTCAAGAATGGAAAGATGTGTATCTAAGGAGTGTGCTGCAACCA  
TGCTTCACATGCAAGGATATGGATATCTCCAACTTATGGTTTATGCCAACAGGTTAAGGTAGAAAAGTTGTGTT  
GGATTGAGAAAGATTTTGTGATTGA

216 NO ATGGGGCCAGAACTTGATACTAATAATGGAATTATTTTTAGGTCTATTAAGAAGACTCTAGAAGATGTCTCATTGTT  
ATGGCTTCTAAAAGACCACGATCATCCAGAGGTCCGACGTAGTGCACCAAAGAGGGATCTAAAAGAGAGGAC  
TAGTTGATGAATCCAATGATAGTTCTAATAGTGACAACAATGTAGTCTCATCTGAACTCTAGGAGATGATGATATT  
GAGGATGATGTGGTTCAAGAAAACCTGGAGGATGGGTATTCTATTGAAAACATCAAAGATAGTCTTGATGCTCGT  
ACACGTAGGATAGTCAACTTTACTCTAAGAAATGTAATAAGGGAAAGGTTAATGATTGGGTTTGGAGGGCGGCTG  
AAATGGATGAATTACTGGTAA

217 yes ATGGATCGTCCCCTGCAGGACTATGAAATAACTCAAGCTCTTTTCTCCTTCAAACCGTTCAAAGCTCCAGGGCCT  
GATGGCATAACCCACATTTTTTTCAATCCCAATGGAAAGTAGTGGGTAATTCTGTCATCGAAAGCTGCCAGCAA  
TTTTAAGACCCTTCTCTGCCTCATACTAAGTTCCCTAATGCTAACCATCTGAAGA ACTATAGGCCTATTGGTCTA  
TGTAATACCATCTATAAAATCATTGCGAACCGCCTTAAGCCCCACCTCAATAATCTTATCAGTCCCTGCCAACTAG  
CTTTCAGAAGGGGAGAAGAGCTTGCCATAATGCCATCCTTATTCAGGA ACTTATGACGCCTTAA

218 NO ATGGAGAAAATGCAAAGTCAACAAAGTGATGATAACAATCAATCAATTGATGCATTTGCAGCAGTCATGAGACAT  
GAACATCTAGGGTGCTTGATATTGTATGGACGAGGAGTTACAAA ACTACTTTGAAAAGGAAAGCACATTCTGAA  
CCCTATTTAAGTGCTAATGATGAGATGATGCAAAAACAATGGAGGAATTGGAAGATGCATCAGAGGATGGCGGA  
AAAATTAGAAGAATAAAAGTAACCATACACCGAGAAGTTACATATGATATCCTTGGACGACTTAATCATATGTATCA  
TGA ACTTCAATTTGAATGA

219 NO ATGTTGGATGGAAAAGCTTTGTTTGCTAATGCTCTAGACGCAAAAACCCCTATGGAATTGGAACATGCAGGGATG  
AGAGAAGACATCACTCGCGGAAGACCCTTACCCCTAACTCCAATCAATCATAATGCCTACCATGCGTTGATCGAA  
GCCACATATTCTAATGATTGCCAACAGAAAAGCTTGCACAATCTCTACCCAATATTCTTGGTTCGCTGGAGAAA  
AAGAAATTAAGGCGTAACCAGTAACATAGACAATTTGTGCAAATGGGTTGAGGTAGTAGAAGAAGTTATCACA  
ACTTTGAAAACAACATGAATGACTTAAAGGGGAAAGCTCTAGTAGAAA ACTGTGAAATGGATAAGTTGGTTGA  
AGTAAGTAGGGCATCGAGAAACACCTTTGGACCCATAGATGCTTTGATGCGGAGCATGAGAATTGTTGAAGAAG  
GAGGATGA

220 NO ATGGATAGA ACTGGTGCTGACACAAGACATGATGAGTCTAGTGAGGTTAGGGGGAAAGTTGAAAAGATGAGGG  
AGTCTCTAATGAAGGACCACTCCAGCTTGTCAAAGGCTTTCTCAAGGTCTATTTTGAGGATCATATTGGCCTTTTT  
GCCTTTCATTTTGTTAAAGTGGCTTGTAGGTGGTGTTCAAAACCAATGGGTCTGAAGTTCCTGATGCTGGTGGC  
ATTGGAGATCTTAGGAATGAGGCAGAGGAGAGTGTTCATATGTTGAGGCATCCTGCTTGTGCGAGAAGACTTCCTT  
GCAGAATGCACTAGCTTTTGGACCAACAATTCCCAGAACTTTTGGTAGAAAAGCGGGTGAAACCATCAGGTCC  
AGGGGCTTTGGTAGCCTTGAAGGATTGGAGGGCTTGGGTGGTAGGAGGTTTGGTTGGTTATGAAGAGATTGATG  
AAATAGGAGAGAATGTGGCCGGTGATTTGACTCTGGTTGTGCGAATGTTGCCAGAGTCATCCTGGAGATTGTTT  
ATCCTATTTCTCCTCCTTATGTTGATGGTGGAGGTATGGAAGAACTGATGTTGGCATCCCATGGGACA ACTAGT  
AAATTCTAGATTTGGTTCTCCAGAATTCAGCCTCCA ACTTGAGAAGATTGTCATACTCTTTGAAGAGGTTCGGACTC  
TAA

221 NO ATGAGGTCATACCTGGGTAGAGGAAGTCCCGATGTCCGGAACCACTTAAGGAGAGCTCTCCCTCACATTGCCATT  
GTCCATGGGGATTATTACTTCCCTCTAAGGAGAGAGCTTGCCCCCGCATGCTCATCTCCAACCATGAGTGTCAAGT  
CTGGTTTGGGTTTGGGAAGTGAGTCGTATAGAACGTCTGACCTCCCAGGGTTATTGGTAGGGTGGGAAGAGTTAC  
AAAAGGTCTTGGGGAGTCTTGTTGTGGACAGTGGCTTGGGAGTTTTTGGTTCTCTTATGGTTTGTCTTCTGGGA  
AGAAATGGGAATTCTTGTCTTTTTTAGGGCTCTATTAAGTCGATATAAATGGAGTTAA

222      yes      ATGAGAGCTTTAATATGGAATATTAGATCGGTAAACACTCAAAAAGGCGTTTACTCGACTTATTAATTTGCACAAAA  
GATACCAATTCTACTTTGTGGGTTTGATGGAGCCGTTTGAAGATAGACATGAAATAGAGGAGTTTAGAAGAAGAT  
TGGGGATGCAACAGGCAGTAGCCAATGCGAATGGGAAGATATGGGCATTTATTGATGAGGTCCTGGAGTATGAAA  
TCATAAGGGATGATGATCAAATGCTAACTGTAATTGTGAAGAATCAATGGATGGGAAGTGAGGTTATGATTTCTTT  
AGTATATGCTAAATGCACACAAAGAGAAAAGATTGCAACTATGGGAGTCGATGTATGATCTGGCAAACACGACTAA  
TCTCCCATGGGTGATAGGTGGTGATTTTAATGTGATTAGTAATGAGGAAGAGAAAAGTTGGGTGGTAGGCCAGTAAC  
TGAGGCGGAGATTAGGGACTTTAATCATTGGATTAATGTGTGCAATTTGGAGGATAAAGGTTTTAAGGGCAGCAA  
ATACACATGGTGGAAATGGCAGAACAGAAAAAGATTGCATATTCAAGAGACTAGACAGGGTCTTATGTAATGAACA  
ATTGCAAAATATATTTCCAGTAATGGAAATAGAACATTTGGTGCGAAATGGGTCTGATCATAACACCATTATTGATTG  
TGTTAAAATCAAGTAATGAGAATGTGATTAAGCCTTTCAAATTCCTGAACTTTTGA

223      NO      ATGCAAAAGGGGAGACCTGTTGCTTTTCTTAGCAAAGTGTTAGCCCCTAAGCATAGAGGCAGATCCATCTATGAG  
AAAGAATATATGACTTTACTTAATGCAGTTGATAAATGGAGGCATTACCTCCAGTTCAAACATTTTGTGGTCAAAA  
CTGACCAACATAGTTTGAAGTATTTGCTCGAACAAAAGGTGACCTCTACTATCCAACAAAAGGTTTAAACCAAGA  
TGCTGGGACTTGACTATGAAGTGCGATACAAGAGAGGAGCAGAAAATAGAGTTGTGATGCTTTGTCCAGGAAA  
TAG

224      yes      ATGAGGACACTAGGTTGTTTATGCTATGCTACTGATCGTAATCCTCATGACAAATTTTCTCGAAGAGCAATACCTG  
CTGTTTTTCATGGGCTACTCTCCTATTCAGAAAGGTTACAGACTATATAATCTTCAAACCTCATGTTTTCTTTGTTAGC  
CGTGATGTTCAATTCAGAGAACATATTTTCCCTTTTAAAGAGTTCTTCTATCTCTAGTTCTGATGCTTCCCTACCCTCT  
ATATCAAATGAACTTCCATCTTATCTCCTTGATTGATGATAGTCCAACATTTTTTCACTCTGCGATCCCTTCCAGTTCA  
GCTCCTGCTCTTGTTCCTGCTGACATCCATCACCTCTTCTACTACTCTTGATCCTTCCAACCCATCTCCTACATCT  
TCTTCTTTATCTCCAGTTCCACTTCCCTGCTCAATCACCTGTGCCACCAGGAAAACCTCTAGAGCTACCAAACCTC  
CGATCTGGCTGTCTGATTATGTTCAATCACATCCACATCACAATCACACTCTCATTCCATCAATCATGTTGTCAAC  
TATTCTCACCTTTCTCCTAGTTATCAAGTTTATCTTTCAAATTTTCTACAACGACTGAACCTCACTCCTACTCTGA  
AGCCATCTTAGATGACAGATGGGTCCAGGCTATGAAACAAGAAATTGATGCCCTTGAGGAAAACAAAACCTGGG  
AAATAGTTGATCTACCAGCTGGAAAACCTCCAATAGGCTGTAAGTGGGTATATAAAATCAAATACCATGTTGATGG  
TTCTATAGAAAGGTTTAAAGGCTCGACTGGTGGCCAAGGGTTATACTCAAAGGAAGGTGTGGACTTTTCATGACAC  
TTTCTCCTGTTGCAAAGATGGACACAGTTAGATGTGTTCTTGCTTTGGCTGCAATGCATGACTGGCCTGTGTTT  
CAAATGGATGTCTTTAATGCCTTTCTTCAAGGTGATCTGCATGAGGAGGTTTTTATGGTACTGCCTCAGGGTTTTG  
GCAGTAAGGGGGAGTCAACACAGGTATGCAGATTAAGAAGTCTTTGTATGGACTTAAACAAGCATCTAGGCAG  
TGGAATATAAAGCTTACTACTGCATTGATTGATTCTGGTTTTCCATCAAAGCAAACATGATTATTCTTTGTTTACTAA  
AAGAGTGAAGGAGAAGTTTGTGATGATACTCATATATGTGGATGATTTACTGATCACCGGAAATGATTTGACACTG  
ATCAAGGATTCACAGGCAAGTCTACAACAAACCTTTAAAATCAAGGACCTAGGTGAGTTAAGGTACTTCTTGGGA  
ATAGAGTTCTTGAGATCTAGCAAGGGGATATTGATGACACAGAGAAAAGTATATACTAGAATTGATTTCAGAATGGG  
GTTTAGCAGGAGCAAACCTGCTATAACACCACTGGAACAACACATGAAGTTCACTACATCTGAGTATGACAAAC  
AGCTGAAAAGGGCAGAAGATGATCCACAATTGGTGGATAAAAATGCTTATAAAAAACTGGTAGGAAAACACTCTG  
TATCTAGCAATGACCAGGCCAGATATTTCTATGCAGTGCAAACCTTGAGTCAATTCATGCATGACCCAAAGTAG

225 NO ATGAAGTTGAATTATGTAGCTCATACTGTTTCGAAATGGAGATACAATAGTAGAGCTGTGCAAAGACGAAGTAGAG  
CTCGAGACTGTGAGATGGAAACACGCTTTAATTCTCTATGTGGTGGGGGCTGACCCAACCTATTGCTGCAGTAGAA  
CGATATATTTTCGGCACAATGGAACACATAGCAAAACCCAAGGTATTTTACCATAATGATGGCTACTTCCTTGTGCG  
TTTTAATAGTTTTAAGGATAGGGGTGAATTGCTATATTCAGGGCCTCACATGCTCGGAAACAAGCCAATAATAGTG  
AAGACTTGGTCGCCGGAGTTTGTATCTCAGCAAAGAGATTATGAAAACCTTCCAATATGGGTAAAGTTCCCGAAC  
CTTCTTTGAATTGCTGGGAATGCAGTCATTAAGCAGACTTAGTAGTTGGTTGAGTATTCCATTGTACGCTGATG  
AATGCACAACACAGATTGACAGAGTCTCTTATGCTAAAGTTCTAGTTAAGATGGACATCAGTCAAAGATGCCAA  
CGGAGGTTAAGGTGGAAGATCTCAATGGGAGAGAATTCCTCAAAGGTAGTATACGAATGGGTGCCGGCTTATT  
GTTCAAAGTGTCTGATAATTGGACACAAGTGTGAGCCAAAAGGGGACACACTGAAGCCTAAAGACAAGTTCGTC  
AAGCCAAGAACAGAGTGGCAACAAAAGATGGTGGAGCCTCGAGGTGAACAAAGTAATGACCTGAGGAACAA  
AGGGCTGAGGTGGTAAGGCCAATGACTGTAGAACAGCATGAAGGAAAAGGTGTAGCTAATACAACACAAAAAG  
AAGGAGAACATGTACTAGTTCATGAGAGTGAGGAGAATTGGGAGGAAGCTAGAGGAAAATCGACAACAAAAGG  
GAAAAGACAATACATGGGTAAGGCTATAATTCCCACAGCAAATGAGTTTGACATATTTCCATAACCATGATACTAGA  
CATATAGCTGGTATGGGAAAAGGGGGAGGAGGATCAAAGGAGGTGGGGAAAAGGCAACAATTTTGTCTATCCTAA  
ATGA

226 yes ATGAGGCATGTTTTTCATCGACTTTGATAATATTGAAGACCACCTCGATGTCGCTTCAAGAAGCTATATGCCACTCG  
GAGGAGACATCATTATGAAAATTGAAAAGTGGAGTACGAACCTCAAACCTGAATCCAACGACACCACTGCCCCCT  
ATCTGGATTACCCTTCCAATCTGCCATGGCATTACTACGAGTGGGATGCAATTTGCCGTATTGTTGAACCAATAG  
GAATCCCGCTAGTGTGGACAAAGCTACTGTTTCAAAAACAAGACCAACTACGGCAAACTGAGAGTAGAAATC  
GACCTTGCAAAACCAATTCTAAGAGAAATTACAGTTGAAATAAGAGACAAAAATGGCTTCTTTGTGCAAAAGGT  
AGAATATGATACTCTACCAGCCTTTTGTGGCATTGTAAAATGCAAGGCCACAACGATAAAAACTGCAGAATTCTT  
CATCCCGAATTAAGAGAGGAACAAAGAGGAGCGGGGGATAACCAATCTATGAAGGCAGACCCCTCATCCAGTGG  
CAGGACAGAGTTGGCAAAGAACCTCAAAAAGGATACACTGCCAAGAAATGAAAAGGGGCATAAAATTGGACAG  
CAACAGTCACAAGCTATTACTCTCACTAAGTCAGTAGACACACAACCTTGATTTCATATTCAGAAACATCCACAGGT  
GCTGGTGGATGGAAAACCTGTTACAAGAAAGAAGGGAAATGTAGCTAATCCACAAGTCAATAAAAACAAGAACG  
GAAAATGCAATAGTGTTGGTATGATGATGGCTGAAAAAACAATACACATACTTGTAGCTCCATAGGTACTCAA  
ATGCAGTGGTAGTAACCTCACAACTACAGAAGTGGAAAATATGGAGATATCACTCTTGAATGCTCCAGCATATG  
CAACAACCTCAACACCCAGGTGA

227 yes ATGGATGTATCCATTCTCCCTGATCAATGGAGACGGCGTGAACATGCTATGACACCAACAACTTTGGCATATCAT  
TTACAACCTCTACTATTAACCGGCTAGAGACATTTCTGGGGTATAAACTTCCATCCCAAACCTTGAGGGCAAGGT  
TCATATCAGGGATGAACTGATGTATGTTATGAACCAACCAAGATGGAGGATAGTTTCAGAAAAGTTACAACTAT  
TTGTGGGACCTGAGTTAG

228 NO ATGATAGCAGACAGAAGGAGGTTATGGGAGCAATTAGTGAATATACACAGCAACAAACAGACACCTTGGCTGGA  
TATGGGAGACTATAACCTTCCATAGAGGAGAAGATAGATTGGTGGGAACCCCTGTCCAAGAGGTAGAGATAAG  
AGACTTTGCTGATTTTTTGGAGGACACAAGTATGACAATACAAAAGCACAAAGGTCGTGATTATACTTGGATAAA  
TGGACACACATATAGTAGAATTGATTGGGATCTAGTAAACACCAAATGGATGCTGGATAAGCCAACTTGGAGGT  
GCAGATTCTTGATCCGGGCTGTTCTGATCATTCCCCACTAAGTATTAACCTTTGGCCAACCTGGATGAGATGAGACCT  
AGGCCGTTTAAATTCCTAAATCATCTAGCAAAGCATGTATAG

229 NO GO:0003723; ATGGTATCAGAGCCTCCTGGTGCCTCGACGCTTCCCGGAATGTCATCACCTCCGGAGCTTCAGAGCTTGCAAGAC  
 RNA binding; GATATCCGTATGGTGC GAAGCCAACTCTCTGTTTTTCGTGGGTGATGTGGGCAAACGTTTTCGAAACCCTCGAGTTA  
 Molecular AATCACTCACAATTTCAAGTTCAGCTGGGTGAGATTTGTGAGACGAACAAGAACTCGAATTTATCATTTCGAAT  
 Function;GO:000 ATGGGATTGCAGAACA CTCTAGCTCTCCCATGACCACCCCAACTGATTTGACTCCACAGGCGACACCAGGAGG  
 3964; RNA- AGGTCAGGGAACCCAGTTCCGTTTGGAAACTGGCCAGACTTCGAATAGCACAGTTCCGATGGTAACTTCCTCTTC  
 directed DNA TCATATGGTAGGTTCTCAATCTCCATTCCTCCATCTGTTTTTGAAGTAGGTAGGGGATTCACTTTTCCCCCAGCAC  
 polymerase CTCTCTTCTCGAGCCCTCCTTTGTTTCGGAACCCCTTTATTCTTCTGCTCCCCGTTACTCCCCACTCCAATCATA  
 activity; CATACTCCAGAATCTGCCTCTCCTCACAGATCTTTCAAACCTAAAATTAATTTCCAGAATTTGATGGCACTAATCC  
 Molecular TCGGAGCTGGTAAAGGAAATGTGAAAAGTTTTTGA ACTATAACAATATAGGTGAACAGGAGAAGCTTAGTTATGC  
 Function;GO:000 ATCCGTCCACCTTGGTGAAAGGGTGGATATCTGGTTTGATAGCTTTTTAGTCAACCAGAGGGGAAGGTTGACATG  
 4190; aspartic- GCCAAGGTTCTGCACTGAAGTTTGCAGAAGATTCGGAAATATTAGGCCCAAGACATTGTTGATGAATCAACAA  
 type ACTCATACAAATGGGGTCTGTGGATCAATACCAGGACAAGTTTGAAGA ACTTACTAGCTATATGACTATAATTAAC  
 endopeptidase CCTTTGTTGAATGAACTCACTTTGTAGCAAGTTTCATTAGTGGTCTTAGACCAGAATTGAAGCCCTTGGTAAAAC  
 activity; TGGCTAATCCCACA ACTGTGCTGGATGCTTATGAGGTCGCTAAGTTGTATGAAGAGTCATTAGGGCACTTATTCC  
 Molecular GTTAGTACCCAACCCAAGGCCATTAGCCATTACCTATCCCAGAAACCCACAACCAAATGCCATGAGACCTCCGAT  
 Function;GO:000 TGTTCCCTCAAATCAGTCACCATTGAGGATAACTTACCATAATCAAAGACCACAAGTTAGGGCTCCATTCAAGCC  
 6278; RNA- AAACATGTTGCCACCTAACTTGAAGCATTGAGGGAACAAGGTCTTTGTTATAAGTGTAAGAGAAGTATTTTCC  
 dependent DNA TGGTCATCAGTGCAAGCAGAAGGGGTTACATGCTATTGATGGGGTTGAAGTTGAAGGAGAAGTGGAGCAACCTG  
 replication; AGGAGTTTTTGGATGTACCTGATACTCTAGAGGAAGAAGAGGCAATTCCAGCTGAAGTATCTTTAAACGCACTGT  
 Biological TGGGACTGAGTACCTCTAGTGGAAATTGTGTCTACCATTAAGATTGTAGGCTATGCTAGAAAGTTGCCAATGACAAT  
 Process;GO:0006 CTTAATTGACAGTGGCTCTACTCACTCTTTTGTGACCCTCACATTGTTAAACTACTGAGAGTGCCCGTACAACCA  
 508; proteolysis; ATGCAGAGACCTCTGCGAGTCACAGTGGCCAATGGGCAGCTAATGAGTTGCCAACTGGAAAGTCCATCATTGG  
 Biological ATGGAAGATGCAGAGTGAACAGTTTAATTTCAATATGAGATTAATGAAAGTAGGAGGTTGTGACATGATATTGGG  
 Process; AATGGACTGGATAGACATGGTTGCCCTGTAATTTTGCACACCAGGCCACACAGCCTAAGTTTTATGACTGATGG  
 AAAAATGGTCACATTGTACGGGGAGACAGAGGATTCTGAAGTAACCACAATGGATACTGAAGCACTTAAAAGGA  
 TGCTCCAGTGTGGGACTTGTGAAATTATAGCGGAATTATCTATGGTGAGTGTTGGATTAGCTATCAAGGACGAACG  
 TGAAGTACATCCAGAAATCACTAAGCTGCTAACAGTTCATAAAGATGTGTTCCAAGAGCCTAAAGAATTACCACC  
 CAAAAGAGATTGTGATCATGTGATCAATTTTGTACCAGGAGCTCAGCCTTTCAACCTCCGACCCTATAGATATTCT  
 TTTGACCAAAAAGAATGCTATTGAAGCTATCATAATGACATGCTCAAGGCCGAAACAGTAGTGAAGAGTCAGTCT  
 TCTTTTGCATCACCAGCTCTACTGGTGA AAAAAGAAAGACTCCACTTGGAGACTTTGTGTGGACTACAGGAGATTG  
 AACAGCCTTACTGTTAAGAACAAGTACCCAATCCCTATGATTGATGACTTGTTAGACGAGCTGTTTGGGGCAACT  
 ATATTTTCCAAAGTGGATTTAAGGGCTGGGTACCATCAGGTTAGAATGAAGACGGGTGAGGAATTCAAAAACAGCA  
 TTCAGAACACATCATGGGCTATGGGAGTTCAGGGTTATGCCTTTTCGGGCTTACCAATGCACCAGCAACATTTCACT  
 CTCTGATGAACTCTGTGTTCCAGGATCAACTGAGGAAATTTATACTAGTGTCTTTGACGATATACTAGTATATAGC



230 NO ATGGTAGCACTTTTGGAAACCAGGATGACCAGTCATGTTGGACTTAAGGACGAATTTGGATTTGATGACTTCTTTG  
AGGTCCCTGTGGTGGGTAGATCTGGGGGTTTGGTCTTGCTTTGGAACACTGCTTGGGTTACTGTTACTCGTCTTAG  
GCATTCTGATCAAGAGATACATGCAATGATTCAGGAGAAATGGGATGGTAATCCACTAACCGTTCTAGGAGCTCC  
CGTTTCTGGTCATGTGTGAATCACTGTAACTTAATTGGCCTAGGGTTTAAAGGAAGCCATTACACTTGGTATAATCA  
TATGAATCATAATAAAGGCCTGATTTTAGAGCGACTAGATAGATGTTTTGCTAATGAAAAATGGCTAGCTTATTACC  
CCAACGCGATAGTCACTCACCTCCCTAAAACCCATTTCGGACCATCATCCTCTCCTTGTCACCTTAAAGTCTTCGTGC  
TAATACCCGCACTTCTAGATCCTTTAGACTAGAGAGTAACTGGTTACAACATCCTAAATTTAGAAATATTGTTAATA  
GTAGTTGGTTGAATAGGGACCTCGTTACCGCTACTGACCATTTTAAAGGGCATACTCACTTACAGGAGCAAGAATA  
CCTTTGGTGATATATTCAAAGGAAAAATAGGTTGCTCGCTAGATTAGATGGTATTCAAAAATCTATGTCTATCCC  
TACAGTATCTTCTCCATCAGTTAGAGCAGGATCTTATTAAGGAATACAATAATACTCCAAGCCGAGGAAGATTA  
CTAG

231 yes ATGGGAAATGAGTCCTATTATAAATCTAAAACGGTCTTATGGGGTAGAACTATTCATCCAGAAATTAGGGAGACTC  
CGGCTGTCAAAAGATTACTGGTCTTGTTTTCGGCTCAGGGGTGGGTAAATGTGTTCTTAAATACTGATGAAATGG  
TCTATGATAATGAGGTGATTGAGTTCTACACTAACTTGATTGTGTTGGACAATACTGTGGTTTCTTCGTTTGTTCAT  
AGTGTGGACTTAGTCTTTGACAAGGTTAAACTAGGAGAAATCTTTCATATTCCTTGATTTGGGTTGGATGAGTATA  
ACTGGTCGAAGGAGGAAAATTGTATGTTAACTTCAAATTCACAGGGCAGGGTTACTGTTTCGTCCTAGGAAGG  
TATTAAGGGGAGATGTCGTTGTTTACAAGTTGGTGTGTTGAGGTGGTACATAAGGGGATACTACCACGGGGTG  
AGCGACGTCATGAAGCTAGCTTTAGGGATATGGGCATTGGTCATGCCTTAGAAAACATGGACCCAATTGACTGGC  
CCTCTTATGATCAAACATATGGCCAGAGTTGTGGATCCTAAAAGACCTCACCAGTTAGCCTATGGAAATTTGTT  
GATCACTGTGTTTAAAGGAGTTTGGGGTACCCCTTAAAGGAAGGTAGGCTTTTGAACAAGAATGACATTTACCAGG  
TCGACTCTCGCTGAATGTTCTGTTGTCCCTCCTCGTGTGCTGGGAATGTTGCTACTCTTCTCAATGAACTCCGT  
GTGGCTAAAGATCAGAATGAGGAGTTAAGGGGTGAAATTCTCACTTTCAGGCGAACTTAGCTGATTCTCAGGG  
GGAAGTTTCACGGTTGAAAGATCAACTAATCCAGCAACAAATTGCCAATAATGTTTCGTATGGATCACATGATGCA  
AGTCCTTGCTTTGCTTCCACCCATCCTCATCCCTCTTCCCCAGCTCACTAA

|     |     |                                                                                                                                                                                                                                                                                                   |                                                                                                                                                                                                                                                                                                                                                                                                                                                                                                                                                                                                                                                                                                                                                                                                                                                                                                                                                                                                                                                                                                                                                                                                               |
|-----|-----|---------------------------------------------------------------------------------------------------------------------------------------------------------------------------------------------------------------------------------------------------------------------------------------------------|---------------------------------------------------------------------------------------------------------------------------------------------------------------------------------------------------------------------------------------------------------------------------------------------------------------------------------------------------------------------------------------------------------------------------------------------------------------------------------------------------------------------------------------------------------------------------------------------------------------------------------------------------------------------------------------------------------------------------------------------------------------------------------------------------------------------------------------------------------------------------------------------------------------------------------------------------------------------------------------------------------------------------------------------------------------------------------------------------------------------------------------------------------------------------------------------------------------|
| 232 | yes | GO:0004672;<br>protein kinase<br>activity;<br>Molecular<br>Function;GO:000<br>4713; protein<br>tyrosine kinase<br>activity;<br>Molecular<br>Function;GO:000<br>5524; ATP<br>binding;<br>Molecular<br>Function;GO:000<br>6468; protein<br>amino acid<br>phosphorylation;<br>Biological<br>Process; | ATGATGAATTCCACTCACATTGCAGTCAAGATTTTTGAATTCGAGGAATTAGCAGCTGCAACAAGCAATTTTCATG<br>AGGATTGTCTTCTTGGAGAGAGTGATTACGGAAGAGTTTACAAAGGACAGATCGATTCTAATCAGGTTGTTGCTA<br>TCCAGAAAGTGGATCATGATAGAATAAGGAATTTTCTTGTGAACTTTATTCCGCTCCTGATAAGAAGCAACTTGA<br>TTGGAACACTAGGATGAAAATTGCTTCCGAAGCAGCAAAAGGATTAGAGTATTTACATGACAAACAACAGCCAA<br>CTGTAATACACCGCGGTATAAACTGCTCTAACATTTTGCTTGGGGAGGGATATCAAGCTAAGCTATCTGGCTTTGG<br>CTTTCGCAAACTGGGGCCTCCAGATGGAAGGAAAGATATCGGAAATTCAAAAGATGGAGAAGAGTCCAATCTTA<br>TTGCTTGGGCAAGACCATCGATCAAAGACGACAAATTTTCAGAAATGGCAGATCCAGCACTTCAAGGCCATTATC<br>CTGCAACAGGCTTGAAGCAAGCACGTGTGTCCAAAAGCAACCTCACGGGCGTCTACCATGGCAGAGGTAG                                                                                                                                                                                                                                                                                                                                                                                                                                                                                                                                                               |
| 233 | yes |                                                                                                                                                                                                                                                                                                   | ATGAAACCATCCCTGCCTACTGCTTTCCTGCAAAATCCAAGGACACCAAGATAAGAAAGAAATGCATAAAGCTT<br>CACCCTGAGTTAAGAGGCATAGGCCCACTAAAGGAAGCTTATTTAACAATCAGAAGAAACAACAACCTTACTCC<br>AAGGACAGGAAATGGTATCACTACTATCAACACCGAAAGTGTAGCAACTCATCAGGACAATTCCAGTGATATTAA<br>GGTGCCTGAAAATGTCGAAGGATGGCAAACAGTTACGAAGAGGAAAGGAAAAACAAGGATGTCCCTACCAAA<br>TCAGAAATCGTGATTTGCCCGGGCTCTAATACTAAGGAGAATATGAATGCTTCAAGAGGATCTACTAGTCAAGCTC<br>ACTCCACAAAACAAGAAAAGAACCAAATCAACACTACTCACAAAATAGGAACTTCAGAGGACAATATGGATATC<br>ACCATCTCAAAAATCCCATCAAGACAACCAACCTACTCAACAACCTAACCCCAACCTCAGATCGTACACA<br>AGAAAAGACAAAATGAAACCCCCCAAAAAGAGCCCTCATCTGAAGAATGTTTCAAGAAGAACATGAGGAAAGTGA<br>CACATAAAAAGGAATCTGTATTCGCAGATGCTCAAGATCAGAATCAAGTTTTGAACTCTAAACTGGTCCATAATTA<br>TTCAGCCAACCTTTTGTCTCCTTTGTTTGGCCTGAACCACAAGTTATTATCAGGGAAAACAGGCAGAAAGAATGA<br>AAATAAGGATCATCTGACTTTGAATTCTGTACTAAATCCACTCCAACCTATTGGATTAGTTACCGAGTCCCTCAGTA<br>ACAAAGACATATGGGAGGACACCTCTTACAAAGACTGTGTGGAAGACTTGAGTTTAGATATAATGATTGAAGATC<br>CTGGACATTCCCTATCTGATGATGAACTCATTAGAGGTCAAAGTCTATTCTTCTTAAGATAAAGACTGTGGGTAA<br>GGACTCTCAAGTGCAGCAAAACGTTGCTTATTACAACAACCTATCTCCGAGTGGTAACTTTGATTCCAATTATTTT<br>GTAGTGGATCAAAGCAAATCTCAAATTCAAATGGATCTAATCTAGACCCGATTTTCCATGATTAA |

|     |     |                                                                                                                                                                                                                                                                                                                                                                                                                                                                                                                                                                                                                                                                                                                           |
|-----|-----|---------------------------------------------------------------------------------------------------------------------------------------------------------------------------------------------------------------------------------------------------------------------------------------------------------------------------------------------------------------------------------------------------------------------------------------------------------------------------------------------------------------------------------------------------------------------------------------------------------------------------------------------------------------------------------------------------------------------------|
| 234 | NO  | ATGCTTGAATTCTCCAGTTGGATAGAGGAGCTAGAACTTAAAGATCCAACCTTCGATGGGTAGGAGTTACACTTGT<br>TTTAGGGGGATTAATCACCAAAGTGCTGCTAAGTTGGACAGTTTTTTGTATTCTATGGAATGGGAGGAGAAGTTCA<br>AAAGTATCAGACTGAGAATTCTTCCAAGAGTAGCTTCTGATCAATGTCCTATAATTCTTGAATGTGAACACAGCGA<br>ACAGAGACAACCTTATTTCAAATTCGAAAATTGGTGGCTCAAGGTGGAGGGATTTAAGGATATGGTACAGGACTG<br>GTGA                                                                                                                                                                                                                                                                                                                                                                                       |
| 235 | yes | ATGAATGGTGACTTGGTGTATGCTGCAACTAAGGGGATTGAGGAAGGAACATAACATCATTGCTAAGGCAAGGCA<br>AAAAAGGAAGGGATAACAATGGTGGATTGTCCAGTGAAGAAAAAAGACTTCTTAATATGATAAGACACAAACTTC<br>AACTTGGCTATACGAAGACATCAAAGAGCAGCACAAACCAATGCAAATCACATCATGGAGCAAATAGTCAA<br>GTAGAAGTTGATTGA                                                                                                                                                                                                                                                                                                                                                                                                                                                                  |
| 236 | NO  | ATGTTCACTTGGTGGAAATGGCATAGCAGAGAAGGAGTGTATATTCAAGAGACTGGACAGAATCCTGAGGATTGCA<br>ACATTGGAGGACTTGATCAAGGTAAGAAGTGCAGCTAGAAACCCAACCAACCCCAACTAATAGATGTGAGCT<br>GAGTAAGGCGGAAGCAGAGTTAAGGAAGTACCCAGTAATTGAGGATGAGTATTGGAGACAAAAAGCTGGTATGA<br>AAAGGTTAAGGAAGAGGATAGTAATACAAAGTTCTTCCACTCTTATGTAAGAGGAAGAAGGAAGAAATTGCAC<br>CTATCTTGGATTAAGATATCAGAAGAAATAAAGTAATTAATAATGAACAAATGAGAGAAGCAACTATTGAATACT<br>TTCAAGATCAATTTTCAGAGGAGAACAAAAACCTAGACTTTGATATGCTTCAAATAATTCTGAATCTAATCAGTGA<br>TGCACAGAATGCAAAGATCATCAAGCTTCCAAGCATAAAAAAATGGAAGAAGTAG                                                                                                                                                                             |
| 237 | yes | ATGCTCTCCAACCTTTCTGAACCTATCAGTTTCAATCAAGCTTGGGAACATCCAGAATGGAGAAAGGCTATGGAG<br>GAAGAGGTTAAAGCTTTACAGGTCAATCACACTTGGGATGTGGTTTTGCTTACCTTTGGGAAAGAAACCATTGCCG<br>TGTAATTGATCTACAAGGTGAAACATAAATCAGATGGAAGTGTGGAGAGACTAAAGGCTAGACTTCTGGTGAG<br>GGGGGACATTCAAAGGGAAAGGATTGACTACACCGAGACTTTTTCTCCTGAGGAAGAAGTCTACATGAAGTTTC<br>CTGCAGTTTTTACTCCTCCTAACCTAATCAAGTTTGTCTATTGAGGAAATCACTATATGGGTTGAAGCAGACATCT<br>AGGCAATGGTATGCTAGGCTTGCAGGTGCACTACAATTCAAAGGGTATTCCAATCCCTGAATGATTACTCCCTAT<br>TTTTCAAGAAAACAGGAAGTGCAATTTCAATCATACCCGTGTATGTGGATGATATATTATTGACAGGAGATGATGC<br>TTCTGAGATAGCTGACATCACAAAGTTTTCTCAACGCAGAGTTCAAGGCAGAATGGGCGTCATGTAAAGATACAAG<br>GAGATCAGTTCAGTCCCTAG                                             |
| 238 | yes | ATGCTGATTGAAGCCATTAAGAACAAGGGGAAGAAGGCTGAGCTGATATCTTATTTCGAAGAATCCTCTTTCACAT<br>GATAATAATAATAGCACAAAGTAGAAACTCCAATCACATCACTTTGACAATAAAGAAGAGGCTGCAGCTTGCCAT<br>ACTAAGGACTATAAGGGCAAAGCTAAAGTTGGTGTGACAACATGAAAAGAAATGAACATTGTTGGAATAGTAG<br>TGATGATCATGAGACTTGTGATGATCAGTACTGTGAAGATTATCATGTGTCACCAAAGAATAAAAAGTGTGAAGAT<br>TTTTGTCAACCAAAAACAAGCAAAAATATCATAAGCTGAAGCTTATGTGGCCCTCAAGGAGTTGATCCAAAC<br>ATCTGCAGGGATCGCTACTGCAAAATACATAGAAGAGGTGGAGGCATGCGAGATTATGTTACTCAAGAAGAAAG<br>ACAGAAAAAGTATGCTATGTTTATGCAAATGGGAGGTCAACCTGCTGGATTTTTCAATGGAGAAGCTGCAACTTA<br>CATGCCAATTCCTCCATATCAATATGGGCATTATGGTCCGGACCTGGATTATGGGTTTTATCCGCCCGCCAGCCCA<br>TGTCAGGGTTAAATGACTTCACTCGTTATTTTGGTGACCAAGATTCTCGCACTTGCACCATTATGTAA |

239      yes      GO:0005524;      ATGGCATACACCTCTGTAACTATTCCGTGAATCATCTGATCCGCCTTCTGAGCTCTCGGGGCCTGATCTTTTCAA  
 ATP binding;      AGAAGGCCAGATCCCCATGCTTAACTGGAGCTCATCTTCTGAGAACTTTTCTCTGGTGGACTGCAAAACGCTG  
 Molecular      TACGGAGAATCAGAATTTGGAAGTACTCTTACGGCAAATCGAAGTTGTGGTGCGAAATGCAATTAGTCATATCAA  
 Function;GO:000      AGCCAGAGATTCCGATGAGTGGTCTCTTCAAGTATTGCATCACACACGACTTCTCAAGCCAGAGATTGAGAAGA  
 6915; apoptosis;      CTTACATCAAATTTGTTAAGTCTTCTCCTCCTATGCCCGACACACGGGTGGTGGTAGAGTTCATGAACAATCTGAT  
 Biological      TGACAATCTGAAGAATCTGCTTTGCTATCCGGACTCTTCCACTTTTTCCCCAGAGGAAGAAGTCAAGCAACTTGT  
 Process;      AACTAAGCTAAGGTTCTTGAGAAATCTTCTTAGCTTTGTAGCTACACGTTGCACCGACCATGAGAAGCTGAAACA  
                          TCTCTCAATTATGCTGAAGCTATAGCTATAGAAGCAGCATGTCTTCTTTCATGTGTTTCATTTGACCAAAAAGATG  
                          GAAACAGTACAAGTTCATTAAGGACAAGCTCACGGAAATGACACGGAAAATTAATCCTATCACTCCAGACATCA  
                          GAAGGATTTACGTGGAAGTCCCTCGAAGCACTGAGTCCATTAACAACAGAGACTGACATTTGAGATCCAGACTTG  
                          GCATCCTTCATAGATACTCTCCAAGATTGTCTAACAGAGCTAAAACACAATCAGCCGCCTTGGATTTCGTTTCGTTGA  
                          AGGTTAACTTTGAAGCCCTCCACCATGAACTCGCCTTCTCAGCTCTTTCGTAAGGACCTCCGGAGCAATTCA  
                          TTGAGAGTTACAAGTCGGATGATCCTAAAGTTGATCCAATTCAACTTCTCTTGGGAGAGATGAGAGACTGGAGCG  
                          CTTCTAGCGCACATCTGTTCAAGCACTATACAGAACATTTGACATTGAAAGGTCAGTTCACCCGATTCAAGATCT  
                          GGCTGTTAAGGTGGGATGTACCATCTTTTTCTTCTTTAATTTCAACGAAATGGAAGAGCACAAGCTTGCGGAAGA  
                          AGAAGCTACACTTGTTGATTTAATCGAAAAGATCAAGCACCTTAAGTCGGAGATCGGAGTTCCCATGTTGACATT  
                          GCCTGAGGTGAATATCATAAGGACAGATGACCTGGGTTTTATCAGAAATTTGATAGAGCTGATTAACCAGCAGGC  
                          AGGTCCACTCGACTGCCTGAAGCGTCGTGTACAGGGAATTGCTGACGAGCTGGAATTCCTAAGTTCCTTTCTCAA  
                          AAAATGTGGAGAGAGGGCGCCATGAGCACGAGAACTGAGGAATCTTGCAGGCCAAATAATGACTGTTGCATACA  
                          GAGCTGAATATGTCATTGACTCGTTATTGGTAAGAGATGGTACTCTATTCTACCATTCAATTTGTATTGTTGATGTCG  
                          TTGGAGAGATGAAGAGAATCAGAAGGGAGGTCATGGTGTGTTGACGAAAAGATGAGCAATGTCATTGAGCCCAAG  
                          GTCCTTAATTCGACAATGCCCTCCAGAGACATGGTAAGTGTGCTATGTCAGAGGAACTAGTGGGCTTAGAGGAT  
                          GAAAAGGAGAGATTAAGAGATCAACTGATAAATGGATCTCATGCGTTAAGTGTCTATAACCAATTCTTGGTATTTGTG  
                          GACTGGGAAAGACAACCTTTGCCATGAGTCTTACCACGATGAGCTTGTGTCAGACACTTTGATATTCGTGCAG  
                          CCGTTTCTGTTTCCCATGTATATGACACTGAAAAATTGGTACTTGCAGTGTGTCACAATATCAATGGATATCCTGAC  
                          ACATCTAATGGAGGGGATGGTGTCTGTTGAAAGTCAAAAAAATGATATATTTGTCTTTGAAAGGAAAGAGGTTT  
                          TTGATCTTAATAGATGATCTGCGGGATACTGAAGCATAACGTTGATTTGGGAAACCTGTTTCCAAACGATTTTACTG  
                          GAAGTAGAATTCTCCTCACCACTCGATCATATCAAATAGCTTCATGTGCTGCGCATAGTACTAAAATACATAATCTT  
                          CGATTTCTTACAGAAGAAGAGAGTTGGAAATTACTTAAAAAGAAGATATTTACCAACAATTTTGTCTTCCAGAA  
                          CTGGAGGAAGCAGGAAAGCGCATGGTCAAACAATGTCACGGGATACCTGCCATGATAGTTTGGATGGCGGATATT  
                          GTTGAAGAACAAGGACAGAAGCCGATTGGATACAAGTTGGGGAATGTAACCAAATGATGAATATCTTTTCAGC  
                          ATTAATGAAAAGAATACAGTGTACATACCAGATCATCTCCGTCCATGCTTCTTTATTTTGGAGCATTTCGGTTGGA  
                          GGAAGAAATCCAGTATCCAAATTGATCAAGTTGTGGGCTGCAGAAGGTTTCATTCAACAACTGAAGCAGAGA  
                          GCTCTGAGGCTGTCGCAATGGATTACCTAAGGTATCTTGTGTAACGAGGTTTTGTAATGGCCTGCAAACGAAGCT

|     |     |                                                                                                                                                                                         |                                                                                                                                                                                                                                                                                                                                                                                                                                                                                                                                                    |
|-----|-----|-----------------------------------------------------------------------------------------------------------------------------------------------------------------------------------------|----------------------------------------------------------------------------------------------------------------------------------------------------------------------------------------------------------------------------------------------------------------------------------------------------------------------------------------------------------------------------------------------------------------------------------------------------------------------------------------------------------------------------------------------------|
| 240 | yes | GO:0003676;<br>nucleic acid<br>binding;<br>Molecular<br>Function;GO:000<br>3677; DNA<br>binding;<br>Molecular<br>Function;GO:001<br>5074; DNA<br>integration;<br>Biological<br>Process; | ATGAAAAGTGATGTGTTTCCCATATTAAGTCTTTCTTTGCTTTAGTTCAAATCAGTTTAATAAGCATGTGAGGA<br>AGATAAGAAGTACAAATGGTACAGAATCTTTAATTCTGAATGTGGTACTTTGTTTAAAACACTTGGCATTGTACA<br>TGAAAGTAGTTGTCCACATAATCCACAGCTGAATGGAGTAGTGGAAAGAAAACATAGGCATATTCTTGAAGTAGC<br>AAGGGCATTGAGGTTTCAAGGTGCTATCCCTATCAGATTTTGGGGAGAATGTGTGTTAGCTACTGTTTATTTGATTA<br>ACAGGTTGCCAACTGAGGTGTTAAAAGGGAAATCTCCTTATGAGCAGTTCAAGCAAAGCTTGACCACCTCAGAA<br>CAATAG                                                                                                                                  |
| 241 | yes |                                                                                                                                                                                         | ATGCCATTTTATCAATCTTTTGTGAGCATGGACGTTCCGAGGACTTGTATGAAACCCATCCGAATGAAGTTGCTG<br>GGCAGGTTGGACGCCATGCTGTTCTGGTCATTGGATTCCGGTACTAGGTATGTTGATGGCGTTTCGTAGGGGGACTTC<br>TTTATTGTGA                                                                                                                                                                                                                                                                                                                                                                        |
| 242 | yes |                                                                                                                                                                                         | ATGAAAGATCTTGGAGAGTTGAAGTTCTTTTTGGGTATAGAATTCTCTAGGTCACACAAAGGCATCCCAATTAATC<br>AGAGAAAATATGCTTTTGAATTGATAGAAGAGCTGGGGTTAAGTGATTCAAATCAGCTTGGACACCTTTAGAGA<br>TCAATCAAAGTTCACAACAAGGAAGTTGATGAACTCACAACAATAAGGATGATGATCTTTTAGAAGATAAG<br>GAAAATACCAAAAATTGATTGGAAAGCTTTTGTACTTGACACTAATAATGCGGGATATTGCATTTGTTGTTTAG                                                                                                                                                                                                                                |
| 243 | yes |                                                                                                                                                                                         | ATGTCTGAGCGACTATTTGATGGAGATCTCCCGGCAGAAAAGGAGATGAAGTCGAATATCTTATACGTAGGGGAT<br>GAATGGGTCGTGCAAAGCTTGACTGACATGAACGAAGATATCCAAACATCATTCTTCTGAAGTGGGGTACAAATCA<br>CTAGATCTAGTTGAACACACCATGGTACATGTGCTTGATCACACTCTAGAGACTCGATTACACCTGGATAATGTTT<br>AAGATGACTTGGTGGAAAGATGAGGATAATGTTTCTTAGTGTGGAAAAGGAAGGGCAGGCGGGGAGTGAATGAA<br>CAAGAACCTACTCCAAGTAAATAATTGCTCAGCCCTCTTTGGTATCCAAGGATTCACAACAACAACAGGGTCTG<br>AGAAGTGGGTTCCCTGAGGAAATCTCAATGTCAGACAAAGGAAAAAGGAAAAATGA                                                                                |
| 244 | NO  |                                                                                                                                                                                         | ATGGTTGCAGCTGCTAGAGTGATCAAGTATGTGAAACAGTCACCTGGACTTGGTGTATTTCATGTCAGCCTCTGCAT<br>CTCCTCTTCTTACAGCATACTGTGATGCAGACAAGGCTGCGTGTGTCAACACAAGACGATCAGTCACCAGATACT<br>TACTTAAGCTTGGTGATTCCATCATTCTGGAATCCAAGAAGCAGCAAACCATTCTACAAGTTCAACTGAGG<br>CTGAATACATGAGTCTCGCTTCCATAGTGGCCGAGGTTGTTTGGCTTACAGGTTTACTGGCAGAGTTAGGTATAAA<br>CTCTGATGGACCAGTTGCTCTGCTTTGTGACAGTAAATATGCTATTTCAGATTGCCACTAACCAGTATTTCATGAAC<br>ATACAAAACACAAGATATAGACTGTCATTTTATACGAGAAAAAATGCAGCTTGGTTTGGTGAATTTGTTGCATAT<br>TTCTACTAACGAACAACAGGTTGATATATTGACAAAAGGTCTTGGCGTGGCTTAG |

245 NO ATGAGGGATCTTGAAAATAAACATAGATCGGACAGAGCTTTCCTGTTGGCGAATGGGTTTATCTAAAATTCAGC  
CTTACACACAAGTTTCTGTAGTTTTTATGCCCTTCAATATGCTTGCAGCCAAATATTTGGGCCTTACCCTATTGATG  
CTAAGATTGGTGTGTGGCCTATATGCTCTTACTACCAGCGGATATGCTAATTCATCCTGCATTCCATGTGTCTCAG  
CTTAATAGGTGTCATGAGTTACCATTGGTGACTACACACACTCTAGTGTTTCACTTATCCAGTCCTTATTGTCCTTC  
TCCTGAGACTATGTTGGACAGGAGATTAGTAAAGAGGGGTAACAAAGTTGTTGAATAG

246 NO ATGGGGGTGATCAATGACTACCCGACCATATGGGACACCATCATGTTGAATAGATTTGAGCATTTCATAAGAACTC  
GACCCCTTATGTTAAGCTTGGGTTTCGTGAGTTCTGCATGGCCTATGCAAAGTCCTTGCCCCAAAAAGGAAGGGA  
TTTATTTGGA AACCTTGGAAGAGGTTCGAAATAGGGTAAAGATTGAAAAGAAGGACATCAACATCGTTGCTCAG  
ATTTGGTTCGGGTTTATCAGTAGCAACCTCATGCCATCCAAGAACGAGTGTATCCTTTTTACCTAAAGGACGTAT  
TGGTTGGAACATTATTGACCGGAAGGACATCCATGTTGGTGCCATCATAGAAGAGGAGATACTCATGAGATCAG  
ATGCTAGGGCCTCTAGGCTTGAGAGGGAGATGCCCAAATATATGGAGAGGTTGATTGAAGCCGCCATATGCCCTG  
TTAAGGTTCTCTTGCCCAAGTTGCCTAAGGTTGTGCCTCCTATTAAGATGAGAGTTGATGCACCTGGTGGGGTAGC  
TAAGAAGCCACCTGATGTTTCATGATAAGGCTGATGATGATGTAGTTGAGGAGCTGATGAGGCTGAATTTGGAGA  
GAGGATGAGCAGTGATACCCGAGATGATTCCATCCTCTCCAAGCCTGGGGTTCAGAGTTCTTCACATGCATAG

**Supplementary Table 16. DM specific genes**

| Code | DM Gene              | Transcript in DM     | Chromosome | RNA-seq support in DM | Functional annotation                                                                                         |
|------|----------------------|----------------------|------------|-----------------------|---------------------------------------------------------------------------------------------------------------|
| 1    | PGSC0003DMG400006617 | PGSC0003DMT400016927 | chr01      | NO                    |                                                                                                               |
| 2    | PGSC0003DMG400008518 | PGSC0003DMT400021967 | chr07      | NO                    | GO:0016884; carbon-nitrogen ligase activity, with glutamine as amido-N-donor; Molecular Function              |
| 3    | PGSC0003DMG400002666 | PGSC0003DMT400006867 | chr09      | yes                   |                                                                                                               |
| 4    | PGSC0003DMG400020031 | PGSC0003DMT400051570 | -          | NO                    |                                                                                                               |
| 5    | PGSC0003DMG400043280 | PGSC0003DMT400093709 | chr04      | NO                    |                                                                                                               |
| 6    | PGSC0003DMG400007077 | PGSC0003DMT400018233 | chr07      | NO                    |                                                                                                               |
| 7    | PGSC0003DMG400001404 | PGSC0003DMT400003553 | chr02      | NO                    | GO:0008152; metabolic process; Biological Process<br>GO:0008415; acyltransferase activity; Molecular Function |
| 8    | PGSC0003DMG400007550 | PGSC0003DMT400019527 | chr09      | yes                   |                                                                                                               |
| 9    | PGSC0003DMG400029541 | PGSC0003DMT400075948 | chr08      | yes                   |                                                                                                               |
| 10   | PGSC0003DMG400036156 | PGSC0003DMT400086585 | -          | NO                    |                                                                                                               |
| 11   | PGSC0003DMG400034450 | PGSC0003DMT400084879 | -          | NO                    |                                                                                                               |
| 12   | PGSC0003DMG400010729 | PGSC0003DMT400027856 | chr11      | yes                   |                                                                                                               |
| 13   | PGSC0003DMG400042139 | PGSC0003DMT400092568 | -          | NO                    |                                                                                                               |
| 14   | PGSC0003DMG400038266 | PGSC0003DMT400088695 | -          | NO                    |                                                                                                               |
| 15   | PGSC0003DMG400036460 | PGSC0003DMT400086889 | chr03      | NO                    |                                                                                                               |
| 16   | PGSC0003DMG401000497 | PGSC0003DMT400001304 | chr02      | NO                    |                                                                                                               |
| 17   | PGSC0003DMG400040508 | PGSC0003DMT400090937 | chr05      | NO                    |                                                                                                               |
| 18   | PGSC0003DMG400047221 | PGSC0003DMT400097650 | -          | NO                    |                                                                                                               |
| 19   | PGSC0003DMG400042878 | PGSC0003DMT400093307 | chr08      | NO                    |                                                                                                               |

|    |                      |                      |       |     |                                                                                                               |
|----|----------------------|----------------------|-------|-----|---------------------------------------------------------------------------------------------------------------|
| 20 | PGSC0003DMG400038794 | PGSC0003DMT400089223 | -     | NO  |                                                                                                               |
| 21 | PGSC0003DMG400009674 | PGSC0003DMT400025045 | chr06 | NO  |                                                                                                               |
| 22 | PGSC0003DMG400028523 | PGSC0003DMT400073428 | chr06 | NO  | GO:0008152; metabolic process; Biological Process<br>GO:0008415; acyltransferase activity; Molecular Function |
| 23 | PGSC0003DMG400017450 | PGSC0003DMT400044992 | chr10 | NO  |                                                                                                               |
| 24 | PGSC0003DMG400032524 | PGSC0003DMT400082405 | -     | yes |                                                                                                               |
| 25 | PGSC0003DMG400038980 | PGSC0003DMT400089409 | chr10 | NO  |                                                                                                               |
| 26 | PGSC0003DMG400038106 | PGSC0003DMT400088535 | -     | NO  |                                                                                                               |
| 27 | PGSC0003DMG400024431 | PGSC0003DMT400062770 | -     | NO  |                                                                                                               |
| 28 | PGSC0003DMG400033868 | PGSC0003DMT400084187 | -     | yes |                                                                                                               |
| 29 | PGSC0003DMG400045276 | PGSC0003DMT400095705 | chr08 | NO  |                                                                                                               |



**Supplementary Table 17. Genes annotated in DM in Figure 3d.**

| DM Gene Code | Gene in DM           | Functional annotation                                                                                                                                                                                                                                                             | RNA-seq support<br>in DM | Premature Stop (PS) |
|--------------|----------------------|-----------------------------------------------------------------------------------------------------------------------------------------------------------------------------------------------------------------------------------------------------------------------------------|--------------------------|---------------------|
| A            | PGSC0003DMG400030563 |                                                                                                                                                                                                                                                                                   | yes                      |                     |
| B            | PGSC0003DMG400030516 |                                                                                                                                                                                                                                                                                   | yes                      |                     |
| C1           | PGSC0003DMG402030515 | GO:0006855; multidrug transport; Biological Process<br>GO:0015238; drug transporter activity; Molecular<br>Function GO:0015297; antiporter activity; Molecular<br>Function GO:0016020; membrane; Cellular Component<br>GO:0055085; transmembrane transport; Biological<br>Process | yes                      |                     |
| C2           | PGSC0003DMG401030515 |                                                                                                                                                                                                                                                                                   | yes                      |                     |
| D            | PGSC0003DMG400030562 |                                                                                                                                                                                                                                                                                   | NO                       | PS in RH            |
| E            | PGSC0003DMG400030514 | GO:0005634; nucleus; Cellular Component GO:0006333;<br>chromatin assembly or disassembly; Biological Process                                                                                                                                                                      | yes                      |                     |
| F            | PGSC0003DMG400030561 | GO:0005515; protein binding; Molecular Function                                                                                                                                                                                                                                   | yes                      |                     |
| G            | PGSC0003DMG400042076 |                                                                                                                                                                                                                                                                                   | NO                       |                     |

|   |                      |                                                                                                                                                                                                                                                                                                                                                                                                                                                                                                                                                                                                                                                                                            |     |          |
|---|----------------------|--------------------------------------------------------------------------------------------------------------------------------------------------------------------------------------------------------------------------------------------------------------------------------------------------------------------------------------------------------------------------------------------------------------------------------------------------------------------------------------------------------------------------------------------------------------------------------------------------------------------------------------------------------------------------------------------|-----|----------|
| H | PGSC0003DMG400030560 | GO:0015986; ATP synthesis coupled proton transport; Biological Process GO:0015992; proton transport; Biological Process GO:0016469; proton-transporting two-sector ATPase complex; Cellular Component GO:0016820; hydrolase activity, acting on acid anhydrides, catalyzing transmembrane movement of substances; Molecular Function GO:0033178; proton-transporting two-sector ATPase complex, catalytic domain; Cellular Component GO:0046034; ATP metabolic process; Biological Process GO:0046933; hydrogen ion transporting ATP synthase activity, rotational mechanism; Molecular Function GO:0046961; proton-transporting ATPase activity, rotational mechanism; Molecular Function | yes |          |
| I | PGSC0003DMG400030559 | GO:0009055; electron carrier activity; Molecular Function GO:0016491; oxidoreductase activity; Molecular Function GO:0055114; oxidation reduction; Biological Process                                                                                                                                                                                                                                                                                                                                                                                                                                                                                                                      | yes |          |
| J | PGSC0003DMG400030513 |                                                                                                                                                                                                                                                                                                                                                                                                                                                                                                                                                                                                                                                                                            | yes |          |
| K | PGSC0003DMG400030558 |                                                                                                                                                                                                                                                                                                                                                                                                                                                                                                                                                                                                                                                                                            | yes |          |
| L | PGSC0003DMG400035916 |                                                                                                                                                                                                                                                                                                                                                                                                                                                                                                                                                                                                                                                                                            | yes |          |
| M | PGSC0003DMG400030511 |                                                                                                                                                                                                                                                                                                                                                                                                                                                                                                                                                                                                                                                                                            | yes | PS in RH |
| N | PGSC0003DMG400030557 |                                                                                                                                                                                                                                                                                                                                                                                                                                                                                                                                                                                                                                                                                            | yes |          |

|   |                      |                                                                                                                                                                         |     |          |
|---|----------------------|-------------------------------------------------------------------------------------------------------------------------------------------------------------------------|-----|----------|
| O | PGSC0003DMG400030556 |                                                                                                                                                                         | yes |          |
| P | PGSC0003DMG400030510 |                                                                                                                                                                         | yes | PS in RH |
| Q | PGSC0003DMG400010740 | GO:0016021; integral to membrane; Cellular Component<br>GO:0051205; protein insertion into membrane; Biological<br>Process                                              | yes |          |
| R | PGSC0003DMG400010739 |                                                                                                                                                                         | yes |          |
| S | PGSC0003DMG400010771 |                                                                                                                                                                         | yes |          |
| T | PGSC0003DMG400010776 | GO:0005515; protein binding; Molecular Function<br>GO:0005524; ATP binding; Molecular Function<br>GO:0044267; cellular protein metabolic process;<br>Biological Process | yes | PS in DM |
| U | PGSC0003DMG400010777 |                                                                                                                                                                         | yes |          |
| V | PGSC0003DMG400010778 | GO:0003676; nucleic acid binding; Molecular Function                                                                                                                    | yes | PS in RH |
| W | PGSC0003DMG400010779 | GO:0008202; steroid metabolic process; Biological<br>Process                                                                                                            | yes |          |

---

**Supplementary Table 18. RH specific genes in Figure 3d.**

| Code | Function annotation                             | RNA-seq support in RH | Sequence                                                                                                                                                                                                                                                                                                                                                                                                                                                                                                                                                                                                                                                                                                                                                                                                                                                                                                                                                                                                                                                                                                                                                                                                                                                                                                                                                                                                                                                                                                                                                                                                                                                                                                                                        |
|------|-------------------------------------------------|-----------------------|-------------------------------------------------------------------------------------------------------------------------------------------------------------------------------------------------------------------------------------------------------------------------------------------------------------------------------------------------------------------------------------------------------------------------------------------------------------------------------------------------------------------------------------------------------------------------------------------------------------------------------------------------------------------------------------------------------------------------------------------------------------------------------------------------------------------------------------------------------------------------------------------------------------------------------------------------------------------------------------------------------------------------------------------------------------------------------------------------------------------------------------------------------------------------------------------------------------------------------------------------------------------------------------------------------------------------------------------------------------------------------------------------------------------------------------------------------------------------------------------------------------------------------------------------------------------------------------------------------------------------------------------------------------------------------------------------------------------------------------------------|
| 1    | Actin related protein ; K05692 actin beta/gamma | NO                    | ATGATAATGGACCCTGCTACCTCTCGCCCTGCTCTAGTCATTGATAATGGAACCTGGG<br>TATACTAAATGGGTTTTGCTGGAAATGTTGAACCAAGTTTTATTTTACCAGCGGTG<br>GTTGCTGTTAATGAGTCGTTTTCTGAATCAGACTCGAGCTACGACTAAGAACAGCAA<br>TTGGCTAGCGCAGCATAGTGCAGGGTTATGGCGGATCTGGATTTTTTATTGGGG<br>AAGAGGCATTGACTAGATCTAAATCTAGTAATACTTATAATCTTAGTTATCCTATTA<br>ACATGGTCAAGTTGATAATTGGGATGCTATAGAGCGTTTTTGGCAGCAATGTATATT<br>TAATTATCTTCGTTGTGACCCTGAGGATCACTATTTTTTATTGACTGAAAGCCCCAT<br>GACTGCACCAGAAAAGTCGAGAATATACCGGTGAGATTATGTTTGAGACTTTCAATA<br>TACCGGGCTTTATATTGCTGTGCAGCCGGTGTGCTTTGGCGGCTGGATATACA<br>ACATCTAAG                                                                                                                                                                                                                                                                                                                                                                                                                                                                                                                                                                                                                                                                                                                                                                                                                                                                                                                                                                                                                                                                                                                                                                         |
| 2    |                                                 | yes                   | ATGGGAAAAGGGGAGGGAAATTTGGAATCATGGAAGGATGGTGTATTGCACTCAA<br>CAGATATGGCACAAGCACCAAGTGGGCATGCAAGCACGCTTGTGCTGGCGGGAA<br>ACAGGACGAGGAGGCCAGACTTTCTTTCTGGTTCCACAAATACAGAGGTGGATG<br>GGATATTGCCAATAAACACTACTGGACATCTGTTGGTTTTACAGGAGTTGCTGGTAT<br>CATACTCGCTCTGCTGTGGTTCAATTTCTTTGGATTGGCTCTTGTAGTGCATTATTGC<br>TGCGGATGGAAGATCAATATTAGAGATGGAGAACGACATTTTTTCAGAGAGAATTTG<br>CCTGATCGTGCTTATCATCTTGACATGTGCTGCAGCTATCGGTTGCATTCTCTTTCT<br>GTTGGACAAGATGATTTTACCGGTGAAGCATTGGACACTCTAAAATATGTTGTAAA<br>CCAGTCAGATTACACTGAACAGACATTGAGAAATGTAACACAATATCTGTTACTCG<br>CAAAAAGTAAATGTGGCCAGATTTTCTCCCTTCAGACGTAAAAGATGATATT<br>GATCGCCTAAATGGAGACCTAACTTCTGCAGCAGATAACCTCAAGGAGAAAAACA<br>ATGAAAAGTCAAGGAAAGATACGAAAAGTCTTCAATGCTGTGCGGTGACGTTTGAT<br>CACTGTTGCTGTGCTTATGCTTCTCATATCCATTCTGGGTCTTTGCCTCTCTATCCTT<br>GGCCATCAACACACAATTCACATATTTATCATTAGCGGATGGTTGCTGGTGGCATT<br>ACATTTGTTCTCTATGGAGTTTTTGTATCATTAACAATGCAATTTTCAGACACTGTC<br>ATGGCAATGGGAGAGTGGGTGGACAATCCTCATGCTGAAAGTGTCTTTAGCAACA<br>TCCTTCCATGTGTTGACCCGAGAATAACAAACCAACCCTATTCAAGAGCAAAACA<br>AGTCACTGTGATCTCGTAAATATTGTCAACGGATTATAGACACATATGCAATTC<br>CAATCCATTAATCATCTCAATTCAAATTAATAACCAGTCAAGACCCGTTATGCC<br>ACGTCCTGCTATCCATATGACTCCCAATTGCAAGATCTGCCATGCCCGACTGATCA<br>AGTGTCTATGGCAAATTTCTCAACGGTTTGGCAGAATTAIACCTGCAATATCTGA<br>GGCCGGAATGTGTACTAGCATCGGTAGGCTGACACCCGACATGTACGAACAGCTA<br>GTGGCAACGGTCAACATAAGCTACGCTCTTGAACATTATGCACCGCCACTGCTTAA<br>TCTCCAGAACTGCAATTTTGTCCGGGATACATTCAAGAACATCACGGCCAATCACT<br>GCCCTCCATTGGAACACCATCTCCGAGTCGTTAATGCAGGGCTAGCCGTCATCTCA<br>GTTGGAGTCATGCTAAGCCTTGCCTTGTGGATAGTATATGCAAAACCGCCCAAAAG<br>GGAGGAAGTGTGCGAAGCTCTTTCGCGTATAAAAAGCAGCTGCAATGGTAAG<br>AATGTTAGCTGCAGCAATAGCAACATTGATTTGTATCAAGAGGCACAACCTCCAAA<br>AATTGGAGTGTAG |
| 3    |                                                 | yes                   | ATGCACATTGCTCGGAATCCGGTTTTCCATGAGAGAACGAAAACGCTAGAGCTTG<br>ACTGTCACTTTGTTCGACAACAATATCTCTTGGCCTCATTCTCTCTTTTTGTTTC<br>CCTCCAAAGATCAACCAGCCGACATTCTCACAAAGCCTTTGTCCGCGCCTTCTCAC<br>CATCATCTTCTCGCAAGATGGGTATCACTTTGCTCCCTCCATCTTGAGGGGGGAT<br>GTAAAAATACACAGACCTTGAACCTCACATTCATCAATGGTGAAGCCATTTTCAAG<br>GAGAAAGAAGAGTTGTTTCAGACAATGAGACAAAAGGCACCTTTGAAGAATGCAAA<br>GTGTTTTAAGCCTTGAATAGTCAGCAGCAACGTGACATAGATCAGCCCTTAATA<br>CTGATTTAGTCAAAGAAAAGATTTGTGCCGTCCACATCAGTGAATCAGGAAAGTTT<br>CCTTACAAAGCACGTGACAAGCACAAGCTTGGCATAGACAAGGAA                                                                                                                                                                                                                                                                                                                                                                                                                                                                                                                                                                                                                                                                                                                                                                                                                                                                                                                                                                                                                                                                                                                                                                                                        |

|   |                                                                                              |     |                                                                                                                                                                                                                                                                                                                                                                                                                                                                                                                                                                                                                                                                                                                                                                                                                                                                                                                                                                                                                                                                                                                                                                                                                                                                                                                                                                                                                                                                                                                                                                                                                                                                                                                                                                                                                                                                                                                                                                                                                                                                                       |
|---|----------------------------------------------------------------------------------------------|-----|---------------------------------------------------------------------------------------------------------------------------------------------------------------------------------------------------------------------------------------------------------------------------------------------------------------------------------------------------------------------------------------------------------------------------------------------------------------------------------------------------------------------------------------------------------------------------------------------------------------------------------------------------------------------------------------------------------------------------------------------------------------------------------------------------------------------------------------------------------------------------------------------------------------------------------------------------------------------------------------------------------------------------------------------------------------------------------------------------------------------------------------------------------------------------------------------------------------------------------------------------------------------------------------------------------------------------------------------------------------------------------------------------------------------------------------------------------------------------------------------------------------------------------------------------------------------------------------------------------------------------------------------------------------------------------------------------------------------------------------------------------------------------------------------------------------------------------------------------------------------------------------------------------------------------------------------------------------------------------------------------------------------------------------------------------------------------------------|
| 4 |                                                                                              | yes | GTGTCACGCAACGAGTCTACACCTGGGCGGGACCGGCACTCGGAGACCATCACT<br>GGCCCCAAGCGAACCCCTTGGCCTGGCGTTCTTAACTCAGCGAAAACCTCAACAAG<br>AATAACTCAAAGCAATGCAGTATTTCAAAAACAACCTTATAAAAAATATGGCCC<br>TAAGGCAAACCGAATCCCAAAAATAGGATATTTACATATATAAGAGACTCAAACTA<br>ACTGATTGTCTGTCTGTCTATGAAGCCTCTAAATTTCTGAGATGGATGTTGGGACA<br>GACCCCGCAACATCCTAATAAGACAAAAGCTAAGAACGCAAAAACAATGAGTCCTC<br>CAGAATGCAAGGAGGCTCACCCTGACTCTGGAGTGCTCAGCTGGATCAACGAC<br>GTTCAGGCTGTGATCTGGGATACCTGAATCTGCATCATGAAACGATGCAGGCCAA<br>CTGGCATCAGTACATGGAATGTACGAGTATGCAAGCTGGAAAACTAAGCAACAAC                                                                                                                                                                                                                                                                                                                                                                                                                                                                                                                                                                                                                                                                                                                                                                                                                                                                                                                                                                                                                                                                                                                                                                                                                                                                                                                                                                                                                                                                                                                                       |
| 5 | estExt_fgenesh<br>4_pg.C_LG_X<br>0521; . ;<br>K10251 beta-<br>keto reductase<br>[EC:1.1.1.-] | yes | TATATCGATCAGTTTTCAAGATGTTTATACGTTGAATACAAACAACATGGTATAGAT<br>GTACCATTATATGTTAAAAACAAAGATGACTTCAAGAGTTGCAAGCATAGAGAAATC<br>ATCATTGTTTAGTCCAACACCAGAGAAGTATGCAAAAGCAGGAGTAGCACAAATA<br>GGATATGGTTGGAGAAGCATGCCTTATGGCCACATCAATCAATGGTGGTTTGTCT<br>TCTTATTGCCTCAACCTCTCTTGTGATGCATGGCGCCTCTCCATTGGCCTTAATAGG<br>AGGATAAAACT                                                                                                                                                                                                                                                                                                                                                                                                                                                                                                                                                                                                                                                                                                                                                                                                                                                                                                                                                                                                                                                                                                                                                                                                                                                                                                                                                                                                                                                                                                                                                                                                                                                                                                                                                              |
| 6 |                                                                                              | yes | ATGGTGAACGACGTCGCGAAGAAATTGATTCCGATGGAGCAACGGAAACGGAA<br>AATACGACCTCATACAAAACGGTTTTTCATAGATACCAACCTTGATACCCACTTGGC<br>TGTAATTGTCTCCGATTCCGATACTATCTCCGATCTTAAAAAAAAGCTCGTGTGTA<br>ACACTTAAAGGTGTTTTCTGAAATGAGTGAGTTGAAGATTTCTTCTGTGAAGGTGA<br>AACGAAAACGACATTACTATCATCTGCCTGACACTATGCTTGTAGAGGTGTTTTT<br>GAGGGTAGCAAGAAGGAATGGTTCCTTTCTGTTGATGCTTCTAGATTCAATGCCT<br>TGAAAATGACCAAGGGTTACTTTGCATAGCGTATCCGCAAATTGAAGCTGAAAATC<br>TTCTCCCATGTGATTCATCAATGCAATGGATAAGCAGAAGGTTTTTGATACTAGTG<br>AATCTTACCCAGCTAATGGGAACCTTGGCATCTAGCTCCATCGTGAAAACAAGGA<br>AGTTGCCAAGGTCATAGGTGAACCTCAAGAGTGTGAAGCGCAGGTAATTCTCAA<br>GAACTTTCTCCAGATCTGGTCACTGTGGCTAAGAAGCGTAAAAATAAGCACAAAG<br>AAGACAGAGTCAACCACCCGGTAACAGGTACCAGCGCTTCAAATCATGGCATAGA<br>TAATGGTTTTGAATTTAAAATGTGGAAATGATACTACTTTGACAAATCTAATGA<br>AGGAGAGCGGGAAAATATAAATGAAACTGGTAGATGTCAATGCTGAACCCTTA<br>ATAAACCAACGTTCTGATCCAGTAAGGTGTCAAAAATTGGGAATGAAGAAAAGCA<br>GGAAGGGTAGGGCAAGTGCTGAAATCCTTGGTGTGCAGGATGAGCTCTGTGGAG<br>ATAGGAACAATGATGCACTTGGTGAACATCACACTCTGGGACTCTTGCAAATAA<br>AGTTAAAATTTGGGTAGCAAGGAAAGCAGTGGAGCTTCCACCGAGTTCAATCAT<br>AGGGATAGCTTGAAGATCGCAATTCAGAGAATCCACAGCAGGTAACCAATAA<br>AGGCAGCTTTAGCAGAAGAAAACATTAGGGGACCAATCTGTGAGAACAGATACAAC<br>CCATAATAAGAGGAAGAAGAAAATTAAGAAGGGGAAGGACTCATCCACGTGCCAT<br>GATGAGGTTGCCTGCATGGCTCTGGGTTCCAATGATAAATTTGTGGGAAGTGGGG<br>ATTAGAGCAAAAAGGAAGGAGTTGAAATGAAGATCTTTGACAAGTTGACTGATGTT<br>GACTCTACTATTCATGCTACTCAATCTAGACTGAAAGAAACATCTTTTGTAAAGAT<br>CATGCGTCAAAACAAAAGAGTGTCCAGCACCAGTCAGCAAGGGTATTTGTGAAATGA<br>ATTTAGTTGGCCAACCTATTCTTGAATCCAATGTCTCTGGAGACGATGAACCTTGG<br>ATTGATGTTGCTAACACAACCTGGGAGAACAGGAGCTGATACCGAAGTGTGATTTG<br>AAATGCCATGAGTGAAAAGTTGAGTGATCCAAGTACCAGGGGTCCAGTGCCTTC<br>CTACCAGTTGGGAGAATTACAAGGAGCAGCAGAAAATAGCTTTGGGAGGAAGAG<br>AAGCAGGGCCAAGAAGTCAACTTCTCATCAGGAGTTAGATATGAAAAAATATTGTT<br>GGGGCTTCTCAAAAATGCTTATGCATCTGACCAAGATATAGTCCGTAATGATGGTTCA<br>AGTGATGCAACAACAAAGGTTGGTAGTATGCCAAAAACTGATGTGGATCATATAAA<br>TGAAATAGGGATCGAAGGCAAGTTGTGAGTTACTCAAGGTGCTGAGACATCCCT<br>CTTTAGATAACAATGAACCAACTGGGGATACTAAAGAACAAAGTTCTCTCAGCAA |

7

yes

ATGAAAGAAATTAGTGTTTCATCATCATCGATAATAATATCGAAATACATATTTTCA  
TCGTCCATACAATAACCAATCCTCCTTTTCTCTCATCGGAACTCATCTTCTTC  
CGCTTTCATCTCCACCACAACAACCTCAAATTCGATTCTGATCTCAAAATTCGTCC  
CGGATATCCACCTACGATTCCATTAAGAAACAGCTAAACAAAACACTCAATC  
CAAACTCAGAAAAATCTGGACGACTCGTGATTGGGATAGAAAAATTGAAGTTTT  
CTCAAAATCTTCGGAGAACTTAGAAATGGAAATTTACTCTCAGATTCATCGAAGG  
TACTCTGATTGGTGCTCGTATGGGTCAGGAAGTGAAGCACTGAAACGAGTCGG  
AGTTTCGGATTCCGTCGGAATGGACCTGTACCGTATCCGCCATTGGTGGTTAAAG  
GAGATTTTATAATCAGCCGTTGACGATGAGATTTTGTCTGGAATTCTCCAATG  
TGTCGATCACGCGCTTTCCCGGAGAAATTTGTATCGGAGATCGAACGGACATTG  
AAGACCGCGGGGTTTGTGTGTACACGTGTCGTTATCTAAACGAGCGGATAAGTA  
TTCGGCGAATGATTGTTTAGTGTGAACCGTTGAAGAAACTGTTAAGCGGTCTG  
AGTTGGTTCATACTCGAACCGTTGATGGGTTCCGGTTTAGATACGGAAGTTGTTTT  
AGAAAAACCGA

---

Supplementary Table 19 is too large to place in this combined PDF file. It is provided as two XLS files as separate datasets.

**Supplementary Table 20. Disease resistance proteins in potato.**

| Predicted Domains | <i>Solanum phureja</i> |       | <i>Populus trichocarpa</i> |       | <i>Oryza sativa</i> |       | <i>Arabidopsis thaliana</i> |       |
|-------------------|------------------------|-------|----------------------------|-------|---------------------|-------|-----------------------------|-------|
|                   | #                      | %     | #                          | %     | #                   | %     | #                           | %     |
| TIR NBS           | 14                     | 3.43  | 13                         | 3.23  | -                   | -     | 21                          | 10.14 |
| TIR NBS LRR       | 35                     | 8.58  | 78                         | 19.40 | -                   | -     | 83                          | 40.10 |
| CC NBS            | 22                     | 5.39  | 19                         | 4.73  | 7                   | 1.31  | 4                           | 1.93  |
| CC NBS LRR        | 60                     | 14.70 | 119                        | 29.60 | 159                 | 29.72 | 51                          | 24.64 |
| NBS LRR           | 172                    | 42.16 | 80                         | 19.90 | 40                  | 7.48  | 6                           | 2.90  |
| NBS               | 105                    | 25.74 | 49                         | 12.19 | 45                  | 8.41  | 1                           | 0.48  |
| Other             | NA*                    | NA*   | 44                         | 10.95 | 284                 | 53.08 | 41                          | 19.81 |
| Total             | 408                    |       | 402                        |       | 535                 |       | 207                         |       |

  

|                            |             |                                                     |                                             |                      |
|----------------------------|-------------|-----------------------------------------------------|---------------------------------------------|----------------------|
| Total # of predicted genes | 39031       | 45550                                               | 37544                                       | 25498                |
| Genome Size                | ~ 800Mb     | 485 Mb                                              | 389Mb                                       | 125 Mb               |
| Source                     | PGSC (2010) | Kohler et al. (2008)<br>G. A. Tuskan, et al. (2006) | IRGSP (2005)<br>G. A. Tuskan, et al. (2006) | Meyers et al. (2003) |



**Supplementary Table 21. Sequencing statistics for each Illumina DM DNA library**

| Library ID       | Insert Size (bp) | Read length(bp) | Total bases (Gbp) |
|------------------|------------------|-----------------|-------------------|
| TUBhswDAADBAAPE  | 200              | 40,45           | 4.53              |
| TUBhswDAADCFBPE  | 206              | 40,39,45        | 0.64              |
| TUBhswDAADCBAPE  | 220              | 40,39,41        | 9.9               |
| TUBhswDAADCCAPE  | 230              | 37              | 6.12              |
| TUBhswfDAADEBAPE | 356              | 42              | 5.31              |
| TUBhswfDAADEAAPE | 400              | 42              | 5.22              |
| TUBhswDAADGHAPE  | 470              | 40              | 0.9               |
| TUBhswDAADGHBPE  | 478              | 42,73,61        | 8.6               |
| TUBhswDAADHGBPE  | 481              | 39              | 0.52              |
| TUBhswfDAADIAAPE | 509              | 67              | 4.45              |
| TUBhswDAADHDAPE  | 519              | 40              | 0.6               |
| TUBhswDAADIJBPE  | 545              | 40              | 3.17              |
| TUBhswDAADIJAPE  | 549              | 39,66           | 3.92              |
| TUBhswDAADIEAPE  | 553              | 38              | 0.33              |
| TUBhswfDABDOBAPE | 800              | 69              | 6.68              |
| TUBhswfDABDOAAPE | 811              | 70              | 9.67              |
| TUBhswDAADWBAPE  | 2180             | 42              | 2.6               |
| TUBhswDAADWAAPE  | 2320             | 41              | 2.57              |
| TUBhswfDAADWAAPE | 2340             | 43              | 2.63              |
| TUBhswDADLAAPE   | 4540             | 45              | 0.79              |
| TUBhswDADLCCPE   | 5060             | 45              | 1.21              |
| TUBhswfDAADLBBPE | 6570             | 43              | 1.98              |
| TUBhswDADLBBPE   | 8170             | 45              | 1.35              |
| TUBhswDBDLAAPE   | 8890             | 45              | 1.41              |
| TUBhswfDAADLAAPE | 9600             | 43              | 2.88              |
| TUBhswDCDLAAPE   | 9770             | 43              | 1.3               |

**Supplementary Table 22. Production of Illumina reads from the DM potato genome**

| Sequencing Data | Insert Size | Total Length (Gb) | Sequence  |                  |
|-----------------|-------------|-------------------|-----------|------------------|
|                 |             |                   | Depth (X) | Read Length (bp) |
| Solexa Reads    | 200-356 bp  | 26.5              | 36.45     | 40,45            |
|                 | 400 -811bp  | 44.06             | 60.61     | 38,39,40,42,67   |
|                 | 2-4kb       | 8.59              | 11.82     | 41,42,43,45      |
|                 | 5-6 Kb      | 3.19              | 4.39      | 45,43            |
|                 | 8-10 Kb     | 6.94              | 9.55      | 45,43            |
| Total           | --          | 89.28             | 122.81    | --               |

**Supplementary Table 23. Statistics of number and length for each assembly level**

| Step                          | Paired-end insert size | Sequence coverage                                         | Physical coverage (X) | N50 (bp)  | N90 (bp) | Total length (bp) |
|-------------------------------|------------------------|-----------------------------------------------------------|-----------------------|-----------|----------|-------------------|
| Initial contig                |                        |                                                           |                       | 697       | 125      | 461,978,406       |
| Scaffold 1                    | 205~330 bp             | 35X                                                       | 90.36                 | 8,659     | 1,203    | 561,466,364       |
| Scaffold 2                    | 420~562 bp             | 51.86X                                                    | 192.77                | 16,454    | 2,822    | 601,449,361       |
| Scaffold 3                    | 729~811bp              | 61.21X                                                    | 241.43                | 22,424    | 6,346    | 620,452,457       |
| Scaffold 4                    | Add 2 kb               | 72.3X                                                     | 399.78                | 67,456    | 14,569   | 640,198,017       |
| Scaffold 5                    | Add 5~6 kb             | 76.7X                                                     | 603.75                | 173,731   | 37,830   | 665,731,592       |
| Scaffold 6                    | Add 8~10 kb            | 79.2X                                                     | 1,484                 | 389,563   | 95,432   | 727,233,046       |
| Final contig                  | All                    | 79.2X                                                     | 1,484                 | 31,429    | 6,858    | 682,695,621       |
| Fosmid end & BAC end & 454 PE | 8K~150 kb              | (fosmid end: 90407;<br>BAC end: 71375; 454<br>PE:1018623) | 14                    | 1,318,511 | 253,760  | 727,424,546       |

**Supplementary Table 24. DM scaffold N50 (N90) size.**

|                      | Contig Size | Contig Number | Scaffold Size | Scaffold Number | Super scaffold (DM data) | Super scaffold (DM data) number | Super scaffold (DM and RH data) | Super scaffold (DM and RH data) number |
|----------------------|-------------|---------------|---------------|-----------------|--------------------------|---------------------------------|---------------------------------|----------------------------------------|
| N90                  | 6,858       | 23,392        | 92,035        | 1,935           | 253,760                  | 622                             | 349,019                         | 443                                    |
| N80                  | 13,084      | 16,371        | 168,472       | 1,366           | 510,824                  | 423                             | 759,501                         | 301                                    |
| N70                  | 18,866      | 12,046        | 240,175       | 1,003           | 784,705                  | 307                             | 1,104,492                       | 222                                    |
| N60                  | 24,812      | 8,893         | 307,947       | 735             | 1,068,563                | 228                             | 1,476,584                       | 165                                    |
| N50                  | 31,429      | 6,446         | 386,629       | 524             | 1,318,511                | 167                             | 1,782,249                       | 121                                    |
| Total Size           | 682,695,621 | -             | 727,233,046   | -               | 727,424,546              | -                               | 727,451,546                     | -                                      |
| Total Number(>100bp) | 111,187     |               | 66,301        |                 | 64,386                   |                                 | 64,116                          |                                        |
| Total Number(>2Kb)   | 34,457      |               | 4,208         |                 | 2,309                    |                                 | 2,043                           |                                        |

**Supplementary Table 25. RH whole-genome Illumina data per insert size.**

| Library type | Insert size | Read length | Total reads   | Total bp        |
|--------------|-------------|-------------|---------------|-----------------|
| Single-end   | 500 bp      | 75          | 107,492,068   | 8,061,905,100   |
| Paired-end   | 200 bp      | 75          | 174,979,788   | 13,123,484,100  |
| Paired-end   | 200 bp      | 125         | 326,814,010   | 40,851,751,250  |
| Paired-end   | 300 bp      | 100         | 82,324,780    | 8,232,478,000   |
| Paired-end   | 500 bp      | 75          | 528,763,314   | 39,657,248,550  |
| Paired-end   | 500 bp      | 125         | 200,147,478   | 25,018,434,750  |
| Matepair     | 2 kb        | 35          | 72,401,032    | 2,534,036,120   |
| Matepair     | 5 kb        | 35          | 167,488,622   | 5,862,101,770   |
| Matepair     | 10 kb       | 35          | 41,822,754    | 1,463,796,390   |
| Total        |             |             | 1,702,233,846 | 144,805,236,030 |

**Supplementary Table 26. RH whole-genome 454 data**

| Library type | Insert size | Average read length | Total reads | Total bp    |
|--------------|-------------|---------------------|-------------|-------------|
| Matepair     | 20 kb       | 259                 | 686,844     | 178,053,005 |
| Matepair     | 20 kb       | 255                 | 653,410     | 166,359,937 |
| Matepair     | 20 kb       | 310                 | 765,621     | 237,055,547 |
| Matepair     | 20 kb       | 293                 | 643,577     | 188,612,498 |
| Total        |             |                     | 2,105,875   | 581,468,489 |

Supplementary Table 27. (A) Anchoring statistics by chromosome for the three different physical maps, de novo (DM) and *in silico* (RH and Tomato).

A.

| Chromosome No. | DM Map              |                   |                   | RH-WGP Map          |                   |                   | Tomato-SGN Map      |                   |                   |
|----------------|---------------------|-------------------|-------------------|---------------------|-------------------|-------------------|---------------------|-------------------|-------------------|
|                | Superscaffold count | Total length (Mb) | Number of markers | Superscaffold count | Total length (Mb) | Number of markers | Superscaffold count | Total length (Mb) | Number of markers |
| 1              | 39                  | 45                | 162               | 69                  | 80                | 208               | 43                  | 41                | 271               |
| 2              | 35                  | 43                | 175               | 35                  | 43                | 120               | 33                  | 40                | 233               |
| 3              | 19                  | 24                | 108               | 28                  | 27                | 73                | 41                  | 45                | 194               |
| 4              | 34                  | 47                | 138               | 51                  | 57                | 168               | 40                  | 39                | 174               |
| 5              | 20                  | 27                | 74                | 33                  | 45                | 137               | 25                  | 30                | 112               |
| 6              | 29                  | 34                | 108               | 44                  | 46                | 119               | 34                  | 34                | 133               |
| 7              | 26                  | 24                | 89                | 35                  | 39                | 122               | 32                  | 31                | 136               |
| 8              | 32                  | 32                | 152               | 24                  | 23                | 57                | 40                  | 32                | 129               |
| 9              | 27                  | 28                | 109               | 34                  | 33                | 91                | 40                  | 39                | 136               |
| 10             | 31                  | 38                | 106               | 34                  | 44                | 102               | 26                  | 32                | 110               |
| 11             | 20                  | 26                | 113               | 36                  | 38                | 110               | 22                  | 26                | 116               |
| 12             | 22                  | 26                | 72                | 47                  | 52                | 164               | 26                  | 28                | 109               |
| <b>Total</b>   | <b>334</b>          | <b>394</b>        | <b>1406</b>       | <b>470</b>          | <b>527</b>        | <b>1471</b>       | <b>402</b>          | <b>417</b>        | <b>1853</b>       |

In each map, the number and length (in Mb) of superscaffolds is given for each chromosome along with the number of markers.

**B) Combination of the three physical maps.**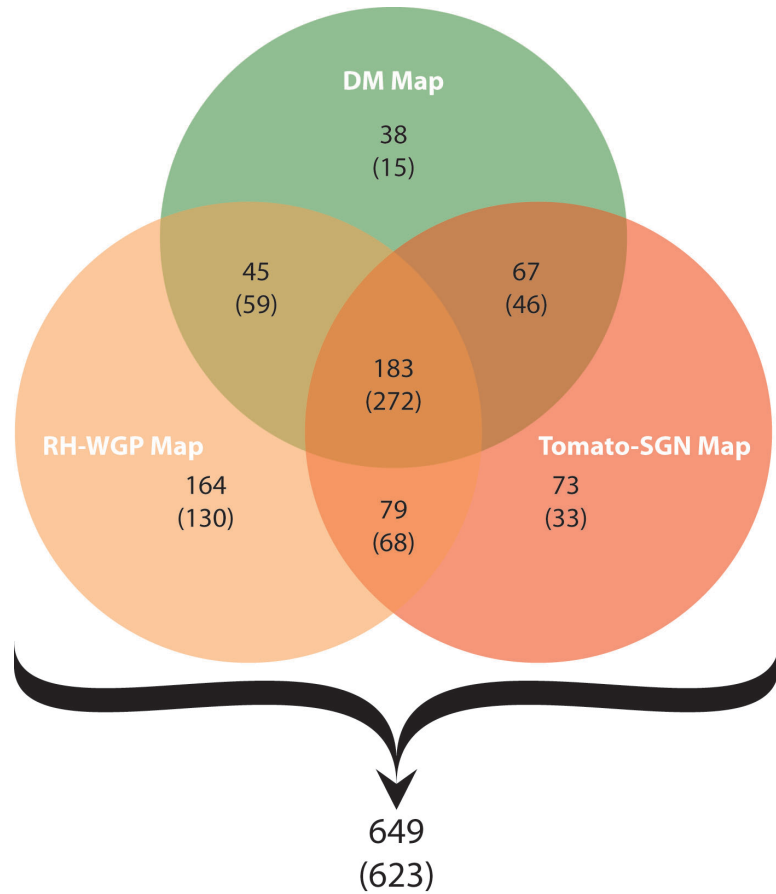

The number of mapped superscaffolds is given in the appropriate intersection of the three different maps and the length/size (in Mb) of chromosome/genome assembly anchored by these superscaffolds is shown in parenthesis. The total number of mapped superscaffolds is 649 which together anchors 623 Mb of the assembled potato genome.



**Supplementary Table 28. The source of proteomes of 11 plant species for OrthoMCL.**

| Species                          | URL                                                                                                                                                                                                                                                                           |
|----------------------------------|-------------------------------------------------------------------------------------------------------------------------------------------------------------------------------------------------------------------------------------------------------------------------------|
| <i>Arabidopsis thaliana</i>      | <a href="ftp://ftp.arabidopsis.org/home/tair/Genes/TAIR9_genome_release/TAIR9_sequences/TAIR9_pep_20090619">ftp://ftp.arabidopsis.org/home/tair/Genes/TAIR9_genome_release/TAIR9_sequences/TAIR9_pep_20090619</a>                                                             |
| <i>Brachypodium distachyon</i>   | <a href="ftp://ftp.jgi-psf.org/pub/JGI_data/phytozome/v5.0/Bdistachyon/annot/Bradi_1.0.pep.fa.gz">ftp://ftp.jgi-psf.org/pub/JGI_data/phytozome/v5.0/Bdistachyon/annot/Bradi_1.0.pep.fa.gz</a>                                                                                 |
| <i>Carica papaya</i>             | <a href="ftp://asgpb.mhpcce.hawaii.edu/papaya/annotation/">ftp://asgpb.mhpcce.hawaii.edu/papaya/annotation/</a>                                                                                                                                                               |
| <i>Chlamydomonas reinhardtii</i> | <a href="ftp://ftp.jgi-psf.org/pub/JGI_data/phytozome/v6.0/Creinhardtii/annotation/Creinhardtii_153_peptide.fa.gz">ftp://ftp.jgi-psf.org/pub/JGI_data/phytozome/v6.0/Creinhardtii/annotation/Creinhardtii_153_peptide.fa.gz</a>                                               |
| <i>Glycine max</i>               | <a href="ftp://ftp.jgi-psf.org/pub/JGI_data/phytozome/v5.0/Gmax/annotation/Glyma1_highConfidence.pep.fa.gz">ftp://ftp.jgi-psf.org/pub/JGI_data/phytozome/v5.0/Gmax/annotation/Glyma1_highConfidence.pep.fa.gz</a>                                                             |
| <i>Oryza sativa</i> *            | <a href="ftp://ftp.plantbiology.msu.edu/pub/data/Eukaryotic_Projects/o_sativa/annotation_dbs/pseudomolecules/version_6.1/all.dir/all.pep">ftp://ftp.plantbiology.msu.edu/pub/data/Eukaryotic_Projects/o_sativa/annotation_dbs/pseudomolecules/version_6.1/all.dir/all.pep</a> |
| <i>Physcomitrella patens</i>     | <a href="ftp://ftp.jgi-psf.org/pub/JGI_data/phytozome/v6.0/Ppatens/annotation/Ppatens_152_peptide.fa.gz">ftp://ftp.jgi-psf.org/pub/JGI_data/phytozome/v6.0/Ppatens/annotation/Ppatens_152_peptide.fa.gz</a>                                                                   |
| <i>Populus trichocarpa</i>       | <a href="ftp://ftp.jgi-psf.org/pub/JGI_data/phytozome/v6.0/Ptrichocarpa/annotation/Ptrichocarpa_156_peptide.fa.gz">ftp://ftp.jgi-psf.org/pub/JGI_data/phytozome/v6.0/Ptrichocarpa/annotation/Ptrichocarpa_156_peptide.fa.gz</a>                                               |
| <i>Sorghum bicolor</i>           | <a href="ftp://ftp.jgi-psf.org/pub/JGI_data/Sorghum_bicolor/v1.0/Sorbi1_GeneModels_Sbi1_4_aa.fasta.gz">ftp://ftp.jgi-psf.org/pub/JGI_data/Sorghum_bicolor/v1.0/Sorbi1_GeneModels_Sbi1_4_aa.fasta.gz</a>                                                                       |
| <i>Vitis vinifera</i>            | <a href="ftp://ftp.jgi-psf.org/pub/JGI_data/phytozome/v6.0/Vvinifera/annotation/Vvinifera_145_peptide.fa.gz">ftp://ftp.jgi-psf.org/pub/JGI_data/phytozome/v6.0/Vvinifera/annotation/Vvinifera_145_peptide.fa.gz</a>                                                           |
| <i>Zea mays</i>                  | <a href="http://ftp.maizesequence.org/current/filtered-set/ZmB73_4a.53_filtered_translations.fasta.gz">http://ftp.maizesequence.org/current/filtered-set/ZmB73_4a.53_filtered_translations.fasta.gz</a>                                                                       |

\*: pseudogenes and TE-related genes are excluded

**Supplementary Table 29. List of transcript assemblies used to define Asterid specific genes.**

**A. List of non-Asterid Species**

| <b>non-Asterid Species Name</b>                | <b>Number of PUTs</b> | <b>PUT version</b> |
|------------------------------------------------|-----------------------|--------------------|
| <i>Adiantum capillus-veneris</i>               | 16,944                | 171a               |
| <i>Agrostis stolonifera</i>                    | 9,039                 | 173a               |
| <i>Allium cepa</i>                             | 12,990                | 161a               |
| <i>Amborella trichopoda</i>                    | 15,772                | 165a               |
| <i>Aquilegia formosa x Aquilegia pubescens</i> | 19,615                | 157a               |
| <i>Arabidopsis thaliana</i>                    | 543,450               | 169a               |
| <i>Arachis duranensis</i>                      | 18,183                | 179a               |
| <i>Arachis hypogaea</i>                        | 30,391                | 171a               |
| <i>Arachis ipaensis</i>                        | 19,201                | 179a               |
| <i>Aristolochia fimbriata</i>                  | 7,967                 | 165a               |
| <i>Avena barbata</i>                           | 21,360                | 173a               |
| <i>Avena sativa</i>                            | 13,499                | 173a               |
| <i>Beta vulgaris</i>                           | 18,009                | 157a               |
| <i>Brachypodium distachyon</i>                 | 30,991                | 175a               |
| <i>Brassica napus</i>                          | 145,002               | 173a               |
| <i>Brassica oleracea</i>                       | 12,843                | 163a               |
| <i>Brassica oleracea var. alboglabra</i>       | 13,513                | 159a               |
| <i>Brassica rapa</i>                           | 44,998                | 171a               |
| <i>Bruguiera gymnorhiza</i>                    | 13,332                | 175a               |
| <i>Cajanus cajan</i>                           | 18,151                | 177a               |
| <i>Cannabis sativa</i>                         | 2,671                 | 177a               |
| <i>Carica papaya</i>                           | 42,169                | 167a               |
| <i>Cenchrus ciliaris</i>                       | 12,364                | 165a               |
| <i>Ceratopteris richardii</i>                  | 4,234                 | 157a               |
| <i>Chlamydomonas reinhardtii</i>               | 50,380                | 163a               |
| <i>Cicer arietinum</i>                         | 14,386                | 175a               |
| <i>Citrus aurantium</i>                        | 11,427                | 167a               |
| <i>Citrus clementina</i>                       | 39,468                | 171a               |
| <i>Citrus limonia</i>                          | 9,857                 | 173a               |
| <i>Citrus reticulata</i>                       | 46,876                | 167a               |
| <i>Citrus sinensis</i>                         | 105,294               | 167a               |
| <i>Citrus trifoliata</i>                       | 35,130                | 173a               |
| <i>Citrus unshiu</i>                           | 10,489                | 169a               |
| <i>Cryptomeria japonica</i>                    | 24,299                | 167a               |
| <i>Cucumis melo subsp. melo</i>                | 13,692                | 163a               |
| <i>Cucumis sativus</i>                         | 5,799                 | 175a               |
| <i>Curcuma longa</i>                           | 6,627                 | 157a               |
| <i>Cyamopsis tetragonoloba</i>                 | 7,618                 | 157a               |
| <i>Cycas rumphii</i>                           | 10,901                | 163a               |

|                                                 |         |      |
|-------------------------------------------------|---------|------|
| <i>Cynodon dactylon</i>                         | 12,782  | 169a |
| <i>Elaeis guineensis</i>                        | 20,874  | 171a |
| <i>Elymus wawawaiensis/Elymus lanceolatus n</i> | 8,782   | 169a |
| <i>Eragrostis curvula</i>                       | 10,948  | 165a |
| <i>Eschscholzia californica</i>                 | 7,546   | 177a |
| <i>Eucalyptus globulus</i>                      | 7,106   | 179a |
| <i>Eucalyptus gunnii</i>                        | 8,171   | 165a |
| <i>Euphorbia esula</i>                          | 27,994  | 157a |
| <i>Fagus sylvatica</i>                          | 8,700   | 179a |
| <i>Festuca arundinacea</i>                      | 32,650  | 175a |
| <i>Festuca pratensis</i>                        | 36,007  | 173a |
| <i>Fragaria vesca</i>                           | 11,527  | 163a |
| <i>Fragaria x ananassa</i>                      | 9,391   | 177a |
| <i>Ginkgo biloba</i>                            | 10,210  | 169a |
| <i>Glycine max</i>                              | 259,849 | 169a |
| <i>Glycine soja</i>                             | 11,332  | 157a |
| <i>Glycyrrhiza uralensis</i>                    | 12,020  | 173a |
| <i>Gnetum gnemon</i>                            | 6,193   | 163a |
| <i>Gossypium arboreum</i>                       | 24,597  | 157a |
| <i>Gossypium barbadense</i>                     | 1,175   | 179a |
| <i>Gossypium hirsutum</i>                       | 98,420  | 165a |
| <i>Gossypium raimondii</i>                      | 27,355  | 157a |
| <i>Hevea brasiliensis</i>                       | 4,896   | 179a |
| <i>Hordeum vulgare</i>                          | 134,482 | 169a |
| <i>Humulus lupulus</i>                          | 9,789   | 168a |
| <i>Jatropha curcas</i>                          | 13,775  | 179a |
| <i>Juglans hindsii x Juglans regia</i>          | 7,753   | 159a |
| <i>Leymus cinereus x Leymus triticoides</i>     | 13,567  | 163a |
| <i>Limnanthes alba</i>                          | 4,359   | 165a |
| <i>Linum usitatissimum</i>                      | 11,026  | 177a |
| <i>Liriodendron tulipifera</i>                  | 14,232  | 165a |
| <i>Lolium perenne</i>                           | 10,937  | 179a |
| <i>Lotus japonicus</i>                          | 56,525  | 177a |
| <i>Malus x domestica</i>                        | 89,158  | 173a |
| <i>Manihot esculenta</i>                        | 30,401  | 165a |
| <i>Marchantia polymorpha</i>                    | 10,959  | 157a |
| <i>Medicago sativa</i>                          | 6,104   | 163a |
| <i>Medicago truncatula</i>                      | 65,628  | 169a |
| <i>Mesembryanthemum crystallinum</i>            | 11,317  | 157a |
| <i>Mesostigma viride</i>                        | 7,371   | 157a |
| <i>Musa ABB Group</i>                           | 5,167   | 169a |
| <i>Musa acuminata</i>                           | 4,510   | 175a |
| <i>Nuphar advena</i>                            | 13,789  | 165a |

|                                                  |         |      |
|--------------------------------------------------|---------|------|
| <i>Oryza sativa</i>                              | 44,644  | 163a |
| <i>Oryza sativa Indica Group</i>                 | 92,900  | 171a |
| <i>Oryza sativa Japonica Group</i>               | 146,642 | 163a |
| <i>Ostreococcus lucimarinus CCE9901</i>          | 13,940  | 161a |
| <i>Panicum virgatum</i>                          | 101,077 | 169a |
| <i>Papaver somniferum</i>                        | 16,486  | 167a |
| <i>Paullinia cupana var. sorbilis</i>            | 10,672  | 167a |
| <i>Persea americana</i>                          | 10,928  | 165a |
| <i>Phaseolus angustissimus</i>                   | 3,499   | 165a |
| <i>Phaseolus coccineus</i>                       | 221,911 | 179a |
| <i>Phaseolus vulgaris</i>                        | 21,361  | 165a |
| <i>Phyllostachys edulis</i>                      | 10,954  | 175a |
| <i>Physcomitrella patens</i>                     | 60,395  | 169a |
| <i>Picea abies</i>                               | 8,715   | 175a |
| <i>Picea engelmannii x Picea glauca</i>          | 13,880  | 157a |
| <i>Picea glauca</i>                              | 48,619  | 175a |
| <i>Picea sitchensis</i>                          | 31,054  | 175a |
| <i>Pinus banksiana</i>                           | 13,040  | 177a |
| <i>Pinus contorta</i>                            | 13,570  | 175a |
| <i>Pinus pinaster</i>                            | 15,648  | 177a |
| <i>Pinus taeda</i>                               | 72,829  | 157a |
| <i>Populus deltoides</i>                         | 8,186   | 163a |
| <i>Populus euphratica</i>                        | 9,117   | 163a |
| <i>Populus nigra</i>                             | 32,718  | 163a |
| <i>Populus tremula</i>                           | 19,633  | 163a |
| <i>Populus tremula x Populus alba</i>            | 15,946  | 169a |
| <i>Populus tremula x Populus tremuloides</i>     | 35,128  | 157a |
| <i>Populus tremuloides</i>                       | 5,730   | 157a |
| <i>Populus trichocarpa</i>                       | 29,682  | 157a |
| <i>Populus trichocarpa x Populus deltoides</i>   | 23,686  | 157a |
| <i>Populus trichocarpa x Populus nigra</i>       | 9,740   | 157a |
| <i>Populus x canadensis</i>                      | 4,940   | 157a |
| <i>Prosopis juliflora</i>                        | 1,125   | 179a |
| <i>Prunus armeniaca</i>                          | 5,637   | 157a |
| <i>Prunus persica</i>                            | 28,475  | 171a |
| <i>Pseudoroegneria spicata</i>                   | 10,168  | 169a |
| <i>Pseudotsuga menziesii var. menziesii</i>      | 9,857   | 161a |
| <i>Quercus petraea</i>                           | 23,740  | 177a |
| <i>Quercus robur</i>                             | 26,509  | 177a |
| <i>Raphanus raphanistrum subsp. landra</i>       | 17,564  | 165a |
| <i>Raphanus raphanistrum subsp. maritimus</i>    | 17,333  | 165a |
| <i>Raphanus raphanistrum subsp. raphanistrum</i> | 33,369  | 165a |
| <i>Raphanus sativus</i>                          | 32,502  | 165a |

|                                                |         |      |
|------------------------------------------------|---------|------|
| <i>Raphanus sativus</i> var. <i>oleiformis</i> | 19,390  | 173a |
| <i>Ricinus communis</i>                        | 12,382  | 163a |
| <i>Saccharum hybrid cultivar</i>               | 48,295  | 177a |
| <i>Saccharum hybrid cultivar SP70-1143</i>     | 18,963  | 177a |
| <i>Saccharum hybrid cultivar SP80-3280</i>     | 81,835  | 177a |
| <i>Saccharum officinarum</i>                   | 131,381 | 157a |
| <i>Saruma henryi</i>                           | 6,754   | 157a |
| <i>Secale cereale</i>                          | 5,977   | 157a |
| <i>Selaginella moellendorffii</i>              | 20,542  | 165a |
| <i>Sorghum bicolor</i>                         | 44,954  | 157a |
| <i>Sorghum propinquum</i>                      | 9,061   | 157a |
| <i>Syntrichia ruralis</i>                      | 7,087   | 169a |
| <i>Tamarix hispida</i>                         | 8,616   | 157a |
| <i>Thellungiella halophila</i>                 | 16,783  | 169a |
| <i>Theobroma cacao</i>                         | 57,035  | 169a |
| <i>Trifolium pratense</i>                      | 12,746  | 157a |
| <i>Triticum aestivum</i>                       | 301,765 | 163b |
| <i>Triticum monococcum</i>                     | 6,987   | 157a |
| <i>Triticum turgidum</i> subsp. <i>durum</i>   | 8,460   | 169a |
| <i>Tropaeolum majus</i>                        | 4,696   | 169a |
| <i>Vigna unguiculata</i>                       | 34,736  | 167a |
| <i>Vitis shuttleworthii</i>                    | 5,905   | 157a |
| <i>Vitis vinifera</i>                          | 64,796  | 169a |
| <i>Volvox carteri</i> f. <i>nagariensis</i>    | 20,687  | 165a |
| <i>Welwitschia mirabilis</i>                   | 6,606   | 157a |
| <i>Zamia vazquezii</i>                         | 7,657   | 165a |
| <i>Zea mays</i>                                | 181,717 | 171a |
| <i>Zingiber officinale</i>                     | 16,495  | 157a |

### B. List of Asterid species

| Asterid Species Name          | Number of PUTs | PUTs version |
|-------------------------------|----------------|--------------|
| <i>Actinidia chinensis</i>    | 18,734         | 167a         |
| <i>Actinidia deliciosa</i>    | 24,981         | 167a         |
| <i>Actinidia eriantha</i>     | 5,282          | 167a         |
| <i>Antirrhinum majus</i>      | 13,801         | 157a         |
| <i>Artemisia annua</i>        | 28,799         | 177a         |
| <i>Barnadesia spinosa</i>     | 21,811         | 169a         |
| <i>Capsicum annuum</i>        | 32,336         | 171a         |
| <i>Carthamus tinctorius</i>   | 22,428         | 159a         |
| <i>Catharanthus roseus</i>    | 9,675          | 165a         |
| <i>Centaurea maculosa</i>     | 28,506         | 161a         |
| <i>Centaurea solstitialis</i> | 26,496         | 169a         |

|                                                           |         |      |
|-----------------------------------------------------------|---------|------|
| <i>Cichorium endivia</i>                                  | 21,603  | 159a |
| <i>Cichorium intybus</i>                                  | 32,617  | 171a |
| <i>Coffea arabica</i>                                     | 10,013  | 175a |
| <i>Coffea canephora</i>                                   | 20,168  | 157a |
| <i>Cynara cardunculus</i> var. <i>scolymus</i>            | 20,915  | 179a |
| <i>Gerbera hybrid cultivar</i>                            | 9,660   | 171a |
| <i>Guizotia abyssinica</i>                                | 20,579  | 169a |
| <i>Helianthus annuus</i>                                  | 61,175  | 169a |
| <i>Helianthus argophyllus</i>                             | 20,511  | 157a |
| <i>Helianthus ciliaris</i>                                | 16,353  | 159a |
| <i>Helianthus exilis</i>                                  | 21,776  | 157a |
| <i>Helianthus paradoxus</i>                               | 20,645  | 159a |
| <i>Helianthus petiolaris</i>                              | 14,885  | 157a |
| <i>Helianthus tuberosus</i>                               | 25,708  | 159a |
| <i>Ipomoea batatas</i>                                    | 12,464  | 169a |
| <i>Ipomoea nil</i>                                        | 22,946  | 157a |
| <i>Lactuca perennis</i>                                   | 12,747  | 157a |
| <i>Lactuca saligna</i>                                    | 12,186  | 157a |
| <i>Lactuca sativa</i>                                     | 29,977  | 157a |
| <i>Lactuca serriola</i>                                   | 22,957  | 157a |
| <i>Lactuca virosa</i>                                     | 12,839  | 157a |
| <i>Mimulus guttatus</i>                                   | 39,577  | 173a |
| <i>Mimulus guttatus</i> var. <i>nasutus</i>               | 9,469   | 175a |
| <i>Mimulus lewisii</i>                                    | 9,950   | 175a |
| <i>Nicotiana benthamiana</i>                              | 25,297  | 173a |
| <i>Nicotiana langsdorffii</i> x <i>Nicotiana sanderae</i> | 6,791   | 157a |
| <i>Nicotiana sylvestris</i>                               | 7,612   | 163a |
| <i>Nicotiana tabacum</i>                                  | 131,942 | 173a |
| <i>Ocimum basilicum</i>                                   | 8,926   | 157a |
| <i>Panax quinquefolius</i>                                | 3,803   | 177a |
| <i>Parthenium argentatum</i>                              | 8,547   | 177a |
| <i>Petunia axillaris</i> subsp. <i>axillaris</i>          | 19,609  | 173a |
| <i>Petunia</i> x <i>hybrida</i>                           | 9,884   | 159a |
| <i>Salvia miltiorrhiza</i>                                | 5,624   | 157a |
| <i>Solanum chacoense</i>                                  | 7,110   | 163a |
| <i>Solanum habrochaites</i>                               | 12,011  | 175a |
| <i>Solanum lycopersicum</i>                               | 56,845  | 171a |
| <i>Solanum melongena</i>                                  | 25,443  | 175a |
| <i>Solanum pennellii</i>                                  | 5,008   | 175a |
| <i>Solanum torvum</i>                                     | 9,182   | 175a |
| <i>Striga hermonthica</i>                                 | 23,747  | 177a |
| <i>Taraxacum kok-saghyz</i>                               | 6,995   | 177a |
| <i>Taraxacum officinale</i>                               | 18,333  | 157a |

|                               |        |      |
|-------------------------------|--------|------|
| <i>Triphysaria pusilla</i>    | 25,947 | 162b |
| <i>Triphysaria versicolor</i> | 15,255 | 162b |
| <i>Zinnia violacea</i>        | 17,011 | 171a |

---

**Supplementary Table 30.** Corrections made to RH BAC sequences using whole-genome Illumina data.

| <b>Substitution</b> | <b>Number of changes</b> |
|---------------------|--------------------------|
| A > T substitution  | 1,223                    |
| C > G substitution  | 322                      |
| A > C substitution  | 505                      |
| A > G substitution  | 1,108                    |
| C > A substitution  | 734                      |
| G > A substitution  | 910                      |
| N substitution      | 230                      |
| A / T insertion     | 3,854                    |
| C / G insertion     | 569                      |
| A/T deletion        | 4,789                    |
| C/G deletion        | 2,763                    |
| N deletion          | 107                      |
| total deletions     | 7,659                    |
| total insertions    | 4,423                    |
| total substitutions | 5,032                    |
| total               | 17,114                   |



**Supplementary Table 31. Metrics of potato gene models**

|                          | Transcript<br>Number | Total Transcript<br>Length (bp) | Ave<br>Transcript<br>Length (bp) | Ave Exon<br>Length<br>(bp) | Ave Intron<br>Length (bp) | Ave CDS<br>Length (bp) | Ave 5'UTR<br>Length (bp) <sup>d</sup> | Ave 3'UTR<br>Length (bp) <sup>e</sup> |
|--------------------------|----------------------|---------------------------------|----------------------------------|----------------------------|---------------------------|------------------------|---------------------------------------|---------------------------------------|
| Potato                   | 56,218               | 79,572,067                      | 1,415                            | 356                        | 592                       | 905                    | 298                                   | 467                                   |
| Arabidopsis <sup>b</sup> | 33,200               | 50,088,890                      | 1,508                            | 265                        | 164                       | 1,212                  | 149                                   | 237                                   |
| Rice <sup>c</sup>        | 50,692               | 78,281,992                      | 1,544                            | 312                        | 414                       | 1,081                  | 254                                   | 464                                   |

<sup>a</sup> For potato, only protein coding nuclear transcripts were used.

<sup>b</sup> For Arabidopsis (TAIR9), all protein coding transcripts were included except for TE and pseudogenes.

<sup>c</sup> For rice, all protein coding transcripts (MSU Release 6.3) were included except for TE, pseudogenes, organellar insertion, and small genes.

<sup>d</sup> 5'UTR (avg) = Total length of 5'UTR/number of transcripts with 5'UTR

<sup>e</sup> 3'UTR (avg) = Total length of 3'UTR/number of transcripts with 3'UTR

**Supplementary Table 32. Comparison of predicted plant proteomes**

A. Pfam domains, Gene Ontologies (GO), KEGG, and InterPro assignments to plant proteomes.

|             | Total Proteins | Pfam Domain | GO     | KEGG   | Interpro |
|-------------|----------------|-------------|--------|--------|----------|
| Potato      | 56,218         | 32,442      | 20,961 | 23,817 | 32,442   |
| Arabidopsis | 33,200         | 25,272      | 17,890 | 16,501 | 26,280   |
| Grapevine   | 26,346         | 17,751      | 13,368 | 13,715 | 18,584   |
| Soybean     | 46,384         | 36,637      | 26,551 | 25,788 | 38,266   |
| Poplar      | 45,554         | 30,777      | 23,116 | 21,686 | 32,381   |
| Cucumber    | 26,820         | 17,355      | 12,649 | 11,864 | 18,099   |
| Rice        | 40,337         | 24,662      | 18,113 | 17,653 | 25,900   |

B. Total Pfam domains and proteins with multiple Pfam domains across plant genomes.

|             | Total Proteins | Total Pfam Domain | No. Proteins with $\geq 1$ Pfam domain |
|-------------|----------------|-------------------|----------------------------------------|
| Potato      | 56,218         | 55,572            | 32,442                                 |
| Arabidopsis | 33,200         | 45,883            | 25,272                                 |
| Cucumber    | 26,820         | 31,072            | 17,355                                 |
| Poplar      | 45,554         | 53,579            | 30,777                                 |
| Soybean     | 46,384         | 67,463            | 36,637                                 |
| Grapevine   | 26,346         | 34,112            | 17,751                                 |
| Rice        | 40,337         | 41,756            | 24,662                                 |

**Supplementary Table 33. Levels of individual carotenoids in DM and RH tuber tissues (mgm/gram fresh weight).**

|           | Neoxanthin   | Vioxanthin    | Anthera-xanthin | Lutein       | Zeaxanthin   | Zea/Lut isomers | Mono hydroxy | Cis/Trans Carotenes | Total Carotenoids |
|-----------|--------------|---------------|-----------------|--------------|--------------|-----------------|--------------|---------------------|-------------------|
| <b>DM</b> | 0.55 +/-0.05 | 11.51 +/-0.93 | 2.63 +/-0.45    | 1.49 +/-0.15 | 0.29 +/-0.07 | 0.26 +/-0.02    | 2.42 +/-0.29 | 3.05 +/-0.24        | 22.19 +/-1.57     |
| <b>RH</b> | 0.16 +/-0.02 | 0.18 +/-0.03  | 0.10 +/-0.01    | 0.60 +/-0.01 | 0.02 +/-0.00 | nd              | 0.50 +/-0.05 | 0.24 +/-0.04        | 1.80 +/-0.10      |

Data are averages and standard deviation of 5 independent extractions and HPLC analyses (refer to Figure S9 for a representative HPLC trace of each variety). Zea/Lut isomers are the sum of various cis isomers of lutein and zeaxanthin; Mono hydroxy is the sum of a complex mixture of alpha, beta and delta-carotene isomers that migrate in a region containing cyclized carotenes with a single hydroxyl group; Cis/trans carotenes, are a complex mixture of various cyclized isomers (e.g., alpha, beta, delta) carotenes and uncyclized (e.g., zeta-carotene, neurosporene, phytofluene) carotenes. nd, not detected.

**Supplementary Table 34. List of Carotenoid biosynthetic genes and their genetic position.**

| Best Transcript      | Description | DM super-scaffold ID | DM scaffold ID       | Chr | Chr position supported by following maps |
|----------------------|-------------|----------------------|----------------------|-----|------------------------------------------|
| PGSC0003DMT400074346 | CHY1        | PGSC0003DMB000000315 | PGSC0003DMS000000935 | 6   | DM, wgp, tom                             |
| PGSC0003DMT400026363 | CHY2        | PGSC0003DMB000000159 | PGSC0003DMS000000374 | 3   | wgp,tom                                  |
| PGSC0003DMT400024575 | CHY3        | PGSC0003DMB000000400 | PGSC0003DMS000000023 | 3   | tom                                      |
| PGSC0003DMT400072543 | CrtISO      | PGSC0003DMB000000008 | PGSC0003DMS000001421 | 10  | DM, wgp                                  |
| PGSC0003DMT400015066 | CycB        | PGSC0003DMB000000345 | PGSC0003DMS000002348 | 6   | DM, wgp, tom                             |
| PGSC0003DMT400027593 | LCYb1       | PGSC0003DMB000000480 | PGSC0003DMS000000051 | 4   | tom                                      |
| PGSC0003DMT400021074 | LCYb2       | PGSC0003DMB000000129 | PGSC0003DMS000003447 | 10  | DM, wgp, tom                             |
| PGSC0003DMT400071048 | NCED3       | PGSC0003DMB000000096 | PGSC0003DMS000002396 | 7   | DM, wgp, tom                             |
| PGSC0003DMT400039054 | NCED5       | PGSC0003DMB000000232 | PGSC0003DMS000000052 | 1   | RH                                       |
| PGSC0003DMT400049305 | NCED6       | PGSC0003DMB000000106 | PGSC0003DMS000000777 | 10  | DM, wgp, tom                             |
| PGSC0003DMT400023667 | PDS         | PGSC0003DMB000000040 | PGSC0003DMS000001764 | 3   | DM, wgp, tom                             |
| PGSC0003DMT400061846 | PSY1        | PGSC0003DMB000000039 | PGSC0003DMS000001131 | 3   | DM, wgp, tom                             |
| PGSC0003DMT400043104 | PSY2        | PGSC0003DMB000000099 | PGSC0003DMS000002349 | 2   | DM, wgp, tom                             |
| PGSC0003DMT400034708 | pTOX1       | PGSC0003DMB000000148 | PGSC0003DMS000000825 | 11  | DM, wgp                                  |
| PGSC0003DMT400027760 | VDE         | PGSC0003DMB000000018 | PGSC0003DMS000002115 | 4   | DM, wgp, tom                             |
| PGSC0003DMT400057865 | ZDS         | PGSC0003DMB000000092 | PGSC0003DMS000001954 | 1   | DM, wgp, tom                             |
| PGSC0003DMT400010287 | ZEP         | PGSC0003DMB000000012 | PGSC0003DMS000002087 | 2   | DM, wgp, tom                             |
| PGSC0003DMT400011667 | ZISO        | PGSC0003DMB000000114 | PGSC0003DMS000000879 | 12  | DM, wgp, tom                             |
